# Supplementary material for: Overexpression of a Cinnamyl Alcohol Dehydrogenase-Coding Gene, GsCAD1, from Wild Soybean Enhances Resistance to Soybean Mosaic Virus
Source: MDPI journal article supplement (doi:10.3390/ijms232315206), 2022-12-02
Supplement: s1 [file s1]

**Table S9.** Primers for qRT-PCR

| Primers            | Sequences                |
|--------------------|--------------------------|
| <i>GmActin11-F</i> | ATCTTGACTGAGCGTGGTTATTCC |
| <i>GmActin11-R</i> | GCTGGTCCTGGCTGTCTCC      |
| <i>SMV-CP-F</i>    | AACAGGGCAAGGGAAGCAAT     |
| <i>SMV-CP-R</i>    | CCATGCCCAAAAGAGTGTGC     |
| <i>GmPAL-02G-F</i> | GGATAATGCACGTTTAGCTGTT   |
| <i>GmPAL-02G-R</i> | CTTCGACAGTTTTCAAAGCAGA   |
| <i>GmPAL-03G-F</i> | ACTGAATCAAGCCATACCCTG    |
| <i>GmPAL-03G-R</i> | TGTTCAGGAGCTTGGTGATG     |
| <i>GmPAL-10G-F</i> | ACTTCAATATTTGGCGAATCCG   |
| <i>GmPAL-10G-R</i> | AGTCCTCTTAGCAACTTGACTC   |
| <i>GmPAL-13G-F</i> | TTACTCTCCTCGATTTTACCGC   |
| <i>GmPAL-13G-R</i> | ATGTAGCCGTTGTTGTTAACAC   |
| <i>GmICS-01G-F</i> | TCCATCAACTGATACGTTTTGC   |
| <i>GmICS-01G-R</i> | AAGCCAGTAGATGTCATGCTAA   |
| <i>GmICS-03G-F</i> | ATGGGTAAATCAAGGTGCTTG    |
| <i>GmICS-03G-R</i> | AAACAAAATACTGCATCGGTGG   |
| <i>GmPRI-F</i>     | GTGGGTGTTCAAACTTGGC      |
| <i>GmPRI-R</i>     | AGCAAGATTCTCCCCGTATTG    |
| <i>GmCAD1-F</i>    | GAGGTGGGAAGCAAAGTAGAG    |
| <i>GmCAD1-R</i>    | ACCATATGTGAACGTAGATTGAGG |
