# Supplementary material for: Overexpression of a Cinnamyl Alcohol Dehydrogenase-Coding Gene, GsCAD1, from Wild Soybean Enhances Resistance to Soybean Mosaic Virus
Source: MDPI journal article supplement (doi:10.3390/ijms232315206), 2022-12-02
Supplement: s1 [file s1]

# Over-Expression of a Cinnamyl Alcohol Dehydrogenase-Coding Gene, *GsCAD1*, From Wild Soybean Enhances Resistance to Soybean Mosaic Virus

Hongwei Xun<sup>1,2,†</sup>, Xueyan Qian<sup>2,†</sup>, Meng Wang<sup>1</sup>, Jiaxin Yu<sup>1</sup>, Xue Zhang<sup>1</sup>, Jinsong Pang<sup>1</sup>, Shucui Wang<sup>1</sup>, Lili Jiang<sup>1,\*</sup>, Yingshan Dong<sup>2,\*</sup> and Bao Liu<sup>1</sup>

1) Key Laboratory of Molecular Epigenetics of MOE, Northeast Normal University, Changchun 130024 China

2) Jilin Provincial Key Laboratory of Agricultural Biotechnology, Jilin Academy of Agricultural Sciences, Changchun 130033, China

† Hongwei Xun and Xueyan Qian contributed equally to this study

\* Correspondence: jiangll269@nenu.edu.cn (L.J.) ; ysdong@cjaas.com (Y.D.)

This file includes:  
Figure S1 to S3

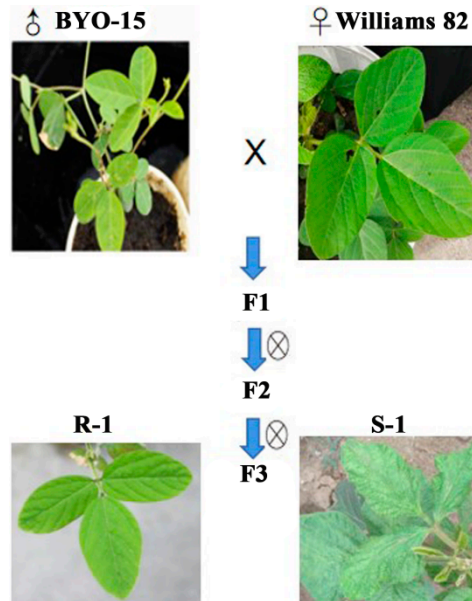

**Figure S1.** Flow chart of cloning the anti-SMV genes from the wild soybean.

The hybrid of Williams 82 and wild soybean accession BYO-15 produced a resistant (R-1) and a susceptible plant (S-1) after two successive generations of selfing. The phenotypes of all types of plants are at one month stage after SMV inoculation.

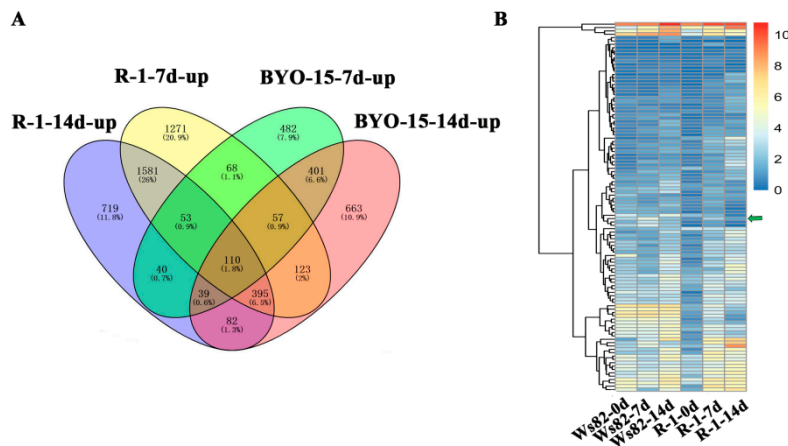

**Figure S2.** Screening of candidate resistance genes.

**A.** The Venny diagram of up-regulated genes (log<sub>2</sub>(fold change) ≥ 2) in different plant types of RNA-Seq including wild soybean (BYO-15) and R-1 (7d and 14d after SMV induction). **B.** The expression level of 110 candidate genes in Williams 82 and S-1 (0d, 7d and 14d before and after SMV induction). The green arrow represents *GmCAD1*. The bar on the right represents log<sub>2</sub>(RPKM+1).

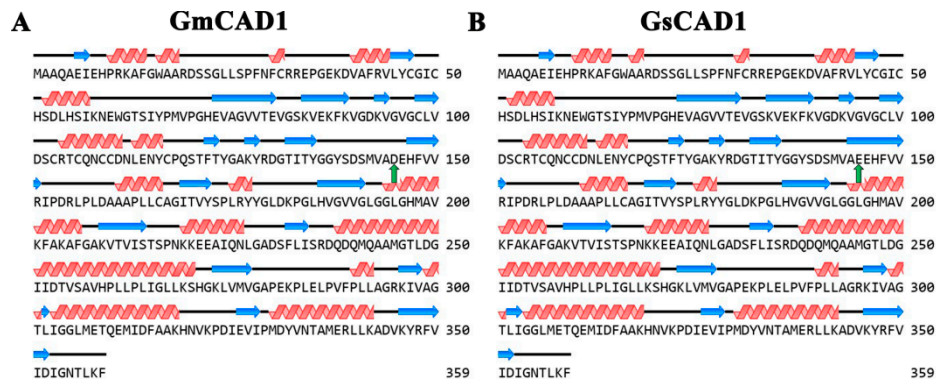

**Figure S3.** Prediction of CAD1 protein secondary structure.

**A.** The protein secondary structure of GmCAD1. **B.** The protein secondary structure of GsCAD1. The green arrow represents the random coil (GmCAD1) was changed to  $\beta$ -sheet (GsCAD1) at the 145 amino acid.
