# Supplementary material for: Overexpression of a Cinnamyl Alcohol Dehydrogenase-Coding Gene, GsCAD1, from Wild Soybean Enhances Resistance to Soybean Mosaic Virus
Source: MDPI journal article supplement (doi:10.3390/ijms232315206), 2022-12-02
Supplement: s1 [file s1]

Archive with 10 entries (10 files):
- ijms-2026041-supplementary.pdf
- Table S1 BYO-15-0D-vs-7D.xlsx
- Table S2 BYO-15-0D-vs-14D.xlsx
- Table S3 Ws82-0D-vs-7D.xlsx
- Table S4 Ws82-0D-vs-14D.xlsx
- Table S5 R-1-0D-vs-7D.xlsx
- Table S6 R-1-0D-vs-14D.xlsx
- Table S7 S-1-0D-vs-7D.xlsx
- Table S8 S-1-0D-vs-14D.xlsx
- Table S9. Primers for qRT-PCR.pdf
