# Supplementary material for: Overexpression of a Cinnamyl Alcohol Dehydrogenase-Coding Gene, GsCAD1, from Wild Soybean Enhances Resistance to Soybean Mosaic Virus
Source: MDPI journal article supplement (doi:10.3390/ijms232315206), 2022-12-02
Supplement: s1 [file s1 › Table S1 BYO-15-0D-vs-7D.xlsx]

## Sheet: Sheet1
test_id	gene_id	gene	locus	sample_1	sample_2	status	value_1	value_2	log2(fold_change)	test_stat	p_value	q_value	significant
Glyma0002s50	Glyma0002s50	Glyma0002s50	Gm02:2248-17672	byo-15-0	byo-15-7	OK	2.59176	3.7924	0.549176	-1.15465	0.248235	0.682963	no
Glyma0003s50	Glyma0003s50	Glyma0003s50	Gm03:8648-28244	byo-15-0	byo-15-7	OK	18.9743	8.40085	-1.17544	2.451	0.0142461	0.140128	no
Glyma0005s50	Glyma0005s50	Glyma0005s50	Gm05:16184-21667	byo-15-0	byo-15-7	OK	0.524059	0.617317	0.236282	-0.304415	0.760812	0.954247	no
Glyma0006s50	Glyma0006s50	Glyma0006s50	Gm06:1757-15096	byo-15-0	byo-15-7	OK	7.18373	5.89179	-0.286028	0.585609	0.558138	0.886803	no
Glyma0007s50	Glyma0007s50	Glyma0007s50	Gm07:1209-3554	byo-15-0	byo-15-7	NOTEST	0	0	0	0	1	1	no
Glyma0010s50	Glyma0010s50	Glyma0010s50	Gm10:10493-13224	byo-15-0	byo-15-7	NOTEST	0.0106343	0.0061472	-0.790723	0.12606	0.899684	1	no
Glyma0011s50	Glyma0011s50	Glyma0011s50	Gm11:1119-5508	byo-15-0	byo-15-7	NOTEST	0	0.00823761	1.79769e+308	1.79769e+308	0.309674	1	no
Glyma0015s50	Glyma0015s50	Glyma0015s50	Gm15:626-2726	byo-15-0	byo-15-7	NOTEST	0	0	0	0	1	1	no
Glyma0017s50	Glyma0017s50	Glyma0017s50	Gm17:405-1845	byo-15-0	byo-15-7	NOTEST	0	0	0	0	1	1	no
Glyma0018s50	Glyma0018s50	Glyma0018s50	Gm18:2484-40137	byo-15-0	byo-15-7	OK	1.89996	2.9002	0.61018	-1.27408	0.202636	0.625195	no
Glyma0021s00410	Glyma0021s00410	Glyma0021s00410	scaffold_21:663659-664067	byo-15-0	byo-15-7	NOTEST	0	0	0	0	1	1	no
Glyma0021s00426	Glyma0021s00426	Glyma0021s00426	scaffold_21:684712-690812	byo-15-0	byo-15-7	OK	1.15058	0.334728	-1.7813	0.939934	0.347251	0.768993	no
Glyma0021s00443	Glyma0021s00443	Glyma0021s00443	scaffold_21:692299-694156	byo-15-0	byo-15-7	OK	0	0.703638	1.79769e+308	1.79769e+308	0.0340106	0.240016	no
Glyma0021s00460	Glyma0021s00460	Glyma0021s00460	scaffold_21:716657-721100	byo-15-0	byo-15-7	OK	1.09073	0.956728	-0.189108	0.234111	0.814899	0.96504	no
Glyma0022s00200	Glyma0022s00200	Glyma0022s00200	scaffold_22:543542-558386	byo-15-0	byo-15-7	NOTEST	0	0	0	0	1	1	no
Glyma0022s00273	Glyma0022s00273	Glyma0022s00273	scaffold_22:561854-563467	byo-15-0	byo-15-7	NOTEST	0	0	0	0	1	1	no
Glyma0022s00346	Glyma0022s00346	Glyma0022s00346	scaffold_22:563726-567494	byo-15-0	byo-15-7	NOTEST	0.118006	0	-1.79769e+308	-1.79769e+308	0.124059	1	no
Glyma0022s00420	Glyma0022s00420	Glyma0022s00420	scaffold_22:722866-725638	byo-15-0	byo-15-7	OK	4.92935	6.49884	0.398784	-0.8133	0.416046	0.815534	no
Glyma0022s00430	Glyma0022s00430	Glyma0022s00430	scaffold_22:728729-731634	byo-15-0	byo-15-7	NOTEST	0	0.103613	1.79769e+308	1.79769e+308	0.233087	1	no
Glyma0022s00443	Glyma0022s00443	Glyma0022s00443	scaffold_22:800491-802362	byo-15-0	byo-15-7	NOTEST	0	0	0	0	1	1	no
Glyma0022s00456	Glyma0022s00456	Glyma0022s00456	scaffold_22:942964-948274	byo-15-0	byo-15-7	OK	2.93729	3.7759	0.362332	-0.380526	0.703555	0.940028	no
Glyma0022s00470	Glyma0022s00470	Glyma0022s00470	scaffold_22:942964-948274	byo-15-0	byo-15-7	NOTEST	0.448146	0.248353	-0.851579	0.20509	0.837502	1	no
Glyma0022s00480	Glyma0022s00480	Glyma0022s00480	scaffold_22:952859-956925	byo-15-0	byo-15-7	OK	1.24175	2.6128	1.07323	-1.60292	0.108952	0.468559	no
Glyma0023s00410	Glyma0023s00410	Glyma0023s00410	scaffold_23:476540-479148	byo-15-0	byo-15-7	OK	4.69195	5.60807	0.257317	-0.497316	0.618966	0.912641	no
Glyma0023s00515	Glyma0023s00515	Glyma0023s00515	scaffold_23:689759-693471	byo-15-0	byo-15-7	OK	0.976791	1.14791	0.232887	-0.257425	0.796851	0.961067	no
Glyma0023s00620	Glyma0023s00620	Glyma0023s00620	scaffold_23:694208-709536	byo-15-0	byo-15-7	OK	4.46611	5.15095	0.205821	-0.338452	0.735023	0.948131	no
Glyma0023s00670	Glyma0023s00670	Glyma0023s00670	scaffold_23:882926-883789	byo-15-0	byo-15-7	NOTEST	0	0	0	0	1	1	no
Glyma0024s00230	Glyma0024s00230	Glyma0024s00230	scaffold_24:8124-13007	byo-15-0	byo-15-7	OK	2.64087	2.25008	-0.231039	0.37442	0.708092	0.941159	no
Glyma0024s00245	Glyma0024s00245	Glyma0024s00245	scaffold_24:191608-197085	byo-15-0	byo-15-7	NOTEST	0	0	0	0	1	1	no
Glyma0024s00260	Glyma0024s00260	Glyma0024s00260	scaffold_24:201620-211808	byo-15-0	byo-15-7	OK	2.9456	1.03361	-1.51087	2.09829	0.0358794	0.247268	no
Glyma0028s00210	Glyma0028s00210	Glyma0028s00210	scaffold_28:233807-247417	byo-15-0	byo-15-7	OK	12.5368	11.7827	-0.0894983	0.180125	0.857055	0.974327	no
Glyma0028s00260	Glyma0028s00260	Glyma0028s00260	scaffold_28:250538-253655	byo-15-0	byo-15-7	NOTEST	0	0	0	0	1	1	no
Glyma0041s00210	Glyma0041s00210	Glyma0041s00210	scaffold_41:27189-31640	byo-15-0	byo-15-7	OK	2.35086	2.12223	-0.147608	0.273949	0.784124	0.957673	no
Glyma0041s00225	Glyma0041s00225	Glyma0041s00225	scaffold_41:41035-42513	byo-15-0	byo-15-7	NOTEST	0	0	0	0	1	1	no
Glyma0041s00240	Glyma0041s00240	Glyma0041s00240	scaffold_41:45959-49258	byo-15-0	byo-15-7	OK	0.0760159	5.30662	6.12535	-4.67354	2.96056e-06	0.000254363	yes
Glyma0041s00260	Glyma0041s00260	Glyma0041s00260	scaffold_41:61732-66813	byo-15-0	byo-15-7	OK	3.5485	1.23505	-1.52263	2.37397	0.0175981	0.160792	no
Glyma0041s00271	Glyma0041s00271	Glyma0041s00271	scaffold_41:70024-73638	byo-15-0	byo-15-7	OK	1.78209	1.98748	0.157364	-0.216894	0.828291	0.966595	no
Glyma0041s00280	Glyma0041s00280	Glyma0041s00280	scaffold_41:74056-78241	byo-15-0	byo-15-7	OK	6.12898	3.20527	-0.935202	1.63478	0.102096	0.453174	no
Glyma0041s00290	Glyma0041s00290	Glyma0041s00290	scaffold_41:85372-94695	byo-15-0	byo-15-7	OK	7.63125	0.991397	-2.94438	5.03159	4.8642e-07	5.97586e-05	yes
Glyma0041s00300	Glyma0041s00300	Glyma0041s00300	scaffold_41:96315-98827	byo-15-0	byo-15-7	OK	12.4406	24.7886	0.994614	-2.05916	0.0394785	0.262834	no
Glyma0041s00310	Glyma0041s00310	Glyma0041s00310	scaffold_41:111899-114096	byo-15-0	byo-15-7	NOTEST	0.101909	0.260152	1.35208	-1.02802	0.303942	1	no
Glyma0041s00331	Glyma0041s00331	Glyma0041s00331	scaffold_41:122453-123227	byo-15-0	byo-15-7	NOTEST	0	0	0	0	1	1	no
Glyma0041s00350	Glyma0041s00350	Glyma0041s00350	scaffold_41:149673-152360	byo-15-0	byo-15-7	NOTEST	0.05906	0	-1.79769e+308	-1.79769e+308	0.124059	1	no
Glyma0041s00360	Glyma0041s00360	Glyma0041s00360	scaffold_41:165449-171887	byo-15-0	byo-15-7	NOTEST	0	0	0	0	1	1	no
Glyma0041s50	Glyma0041s50	Glyma0041s50	scaffold_41:4320-9458	byo-15-0	byo-15-7	NOTEST	0.0205321	0.0466915	1.18528	-0.787875	0.43077	1	no
Glyma0042s100	Glyma0042s100	Glyma0042s100	scaffold_42:281628-284115	byo-15-0	byo-15-7	NOTEST	0.193646	0.414419	1.09767	-0.722199	0.470172	1	no
Glyma0042s50	Glyma0042s50	Glyma0042s50	scaffold_42:265872-271658	byo-15-0	byo-15-7	NOTEST	0	0	0	0	1	1	no
Glyma0048s00220	Glyma0048s00220	Glyma0048s00220	scaffold_48:756-13042	byo-15-0	byo-15-7	NOTEST	0	0	0	0	1	1	no
Glyma0048s00230	Glyma0048s00230	Glyma0048s00230	scaffold_48:13316-18869	byo-15-0	byo-15-7	OK	0.510847	2.0937	2.03509	-0.492827	0.622135	0.914098	no
Glyma0048s00240	Glyma0048s00240	Glyma0048s00240	scaffold_48:13316-18869	byo-15-0	byo-15-7	OK	2.54469	6.79157	1.41626	-2.77425	0.00553295	0.076378	no
Glyma0048s00250	Glyma0048s00250	Glyma0048s00250	scaffold_48:24012-27245	byo-15-0	byo-15-7	OK	53.0633	35.1207	-0.595394	1.21572	0.22409	0.653943	no
Glyma0048s00260	Glyma0048s00260	Glyma0048s00260	scaffold_48:30256-31906	byo-15-0	byo-15-7	OK	0.836462	2.00412	1.2606	-1.79585	0.0725177	0.372342	no
Glyma0048s00270	Glyma0048s00270	Glyma0048s00270	scaffold_48:32191-38154	byo-15-0	byo-15-7	OK	24.6246	12.2758	-1.00428	2.10413	0.0353673	0.245042	no
Glyma0048s00280	Glyma0048s00280	Glyma0048s00280	scaffold_48:41005-46815	byo-15-0	byo-15-7	OK	6.11345	6.35956	0.0569385	-0.111003	0.911614	0.983895	no
Glyma0048s00290	Glyma0048s00290	Glyma0048s00290	scaffold_48:51746-58457	byo-15-0	byo-15-7	OK	13.4744	18.4041	0.449805	-0.899093	0.368603	0.78749	no
Glyma0048s00300	Glyma0048s00300	Glyma0048s00300	scaffold_48:62047-65487	byo-15-0	byo-15-7	OK	36.1539	53.0107	0.552131	-0.990193	0.32208	0.748847	no
Glyma0048s00305	Glyma0048s00305	Glyma0048s00305	scaffold_48:62047-65487	byo-15-0	byo-15-7	OK	3.75873	5.71192	0.60373	-0.374377	0.708124	0.941159	no
Glyma0048s00310	Glyma0048s00310	Glyma0048s00310	scaffold_48:73905-75284	byo-15-0	byo-15-7	NOTEST	0.0409727	0.0218367	-0.907907	0.434226	0.664124	1	no
Glyma0048s00320	Glyma0048s00320	Glyma0048s00320	scaffold_48:78264-89175	byo-15-0	byo-15-7	OK	3.13175	3.58378	0.194511	-0.344248	0.73066	0.946858	no
Glyma0048s00330	Glyma0048s00330	Glyma0048s00330	scaffold_48:92831-93821	byo-15-0	byo-15-7	OK	15.0485	14.0794	-0.0960352	0.194794	0.845554	0.970794	no
Glyma0048s00340	Glyma0048s00340	Glyma0048s00340	scaffold_48:93959-105291	byo-15-0	byo-15-7	OK	2.32081	3.66369	0.658671	-1.3748	0.169193	0.578585	no
Glyma0048s00350	Glyma0048s00350	Glyma0048s00350	scaffold_48:115208-118892	byo-15-0	byo-15-7	NOTEST	0	0	0	0	1	1	no
Glyma0048s50	Glyma0048s50	Glyma0048s50	scaffold_48:756-13042	byo-15-0	byo-15-7	NOTEST	0	0.0361571	1.79769e+308	1.79769e+308	0.147546	1	no
Glyma0053s100	Glyma0053s100	Glyma0053s100	scaffold_53:40277-44576	byo-15-0	byo-15-7	NOTEST	0	0	0	0	1	1	no
Glyma0053s150	Glyma0053s150	Glyma0053s150	scaffold_53:60537-64721	byo-15-0	byo-15-7	NOTEST	0	0	0	0	1	1	no
Glyma0053s200	Glyma0053s200	Glyma0053s200	scaffold_53:96299-97317	byo-15-0	byo-15-7	NOTEST	0	0	0	0	1	1	no
Glyma0053s50	Glyma0053s50	Glyma0053s50	scaffold_53:1663-6177	byo-15-0	byo-15-7	NOTEST	0	0	0	0	1	1	no
Glyma0057s100	Glyma0057s100	Glyma0057s100	scaffold_57:113347-115364	byo-15-0	byo-15-7	OK	0.820759	0.614411	-0.417754	0.37838	0.705149	0.940321	no
Glyma0057s50	Glyma0057s50	Glyma0057s50	scaffold_57:98459-99986	byo-15-0	byo-15-7	NOTEST	0	0	0	0	1	1	no
Glyma0060s00220	Glyma0060s00220	Glyma0060s00220	scaffold_60:12548-13243	byo-15-0	byo-15-7	NOTEST	0	0	0	0	1	1	no
Glyma0060s00320	Glyma0060s00320	Glyma0060s00320	scaffold_60:67387-68707	byo-15-0	byo-15-7	NOTEST	0	0	0	0	1	1	no
Glyma0060s00370	Glyma0060s00370	Glyma0060s00370	scaffold_60:104356-106210	byo-15-0	byo-15-7	NOTEST	0	0	0	0	1	1	no
Glyma0066s50	Glyma0066s50	Glyma0066s50	scaffold_66:161914-164286	byo-15-0	byo-15-7	NOTEST	0	0	0	0	1	1	no
Glyma0067s50	Glyma0067s50	Glyma0067s50	scaffold_67:44433-45302	byo-15-0	byo-15-7	NOTEST	0	0	0	0	1	1	no
Glyma0070s50	Glyma0070s50	Glyma0070s50	scaffold_70:35574-40055	byo-15-0	byo-15-7	OK	1.95707	0.962347	-1.02406	1.35027	0.176929	0.589991	no
Glyma0079s00200	Glyma0079s00200	Glyma0079s00200	scaffold_79:9482-9737	byo-15-0	byo-15-7	NOTEST	0	0	0	0	1	1	no
Glyma0079s00210	Glyma0079s00210	Glyma0079s00210	scaffold_79:16304-17051	byo-15-0	byo-15-7	NOTEST	0	0	0	0	1	1	no
Glyma0079s00220	Glyma0079s00220	Glyma0079s00220	scaffold_79:17736-18009	byo-15-0	byo-15-7	NOTEST	0	0	0	0	1	1	no
Glyma0079s00230	Glyma0079s00230	Glyma0079s00230	scaffold_79:18723-19596	byo-15-0	byo-15-7	NOTEST	0	0.0638164	1.79769e+308	1.79769e+308	0.194774	1	no
Glyma0079s00240	Glyma0079s00240	Glyma0079s00240	scaffold_79:20660-20912	byo-15-0	byo-15-7	OK	0.654193	0.530406	-0.302621	0.0942758	0.92489	0.986318	no
Glyma0079s00250	Glyma0079s00250	Glyma0079s00250	scaffold_79:20961-21240	byo-15-0	byo-15-7	OK	2.44739	0.886774	-1.46461	0.916503	0.359403	0.7794	no
Glyma0079s00261	Glyma0079s00261	Glyma0079s00261	scaffold_79:22053-22326	byo-15-0	byo-15-7	NOTEST	0	0	0	0	1	1	no
Glyma0079s00270	Glyma0079s00270	Glyma0079s00270	scaffold_79:25288-26862	byo-15-0	byo-15-7	NOTEST	0	0	0	0	1	1	no
Glyma0079s00280	Glyma0079s00280	Glyma0079s00280	scaffold_79:27077-28537	byo-15-0	byo-15-7	NOTEST	0.0145363	0	-1.79769e+308	-1.79769e+308	0.281812	1	no
Glyma0079s00290	Glyma0079s00290	Glyma0079s00290	scaffold_79:30187-34025	byo-15-0	byo-15-7	NOTEST	0	0	0	0	1	1	no
Glyma0079s00295	Glyma0079s00295	Glyma0079s00295	scaffold_79:54681-55767	byo-15-0	byo-15-7	NOTEST	0.0397851	0.0210403	-0.919073	0.31082	0.755937	1	no
Glyma0079s00300	Glyma0079s00300	Glyma0079s00300	scaffold_79:56320-57461	byo-15-0	byo-15-7	NOTEST	0.019723	0	-1.79769e+308	-1.79769e+308	0.281812	1	no
Glyma0079s00311	Glyma0079s00311	Glyma0079s00311	scaffold_79:123336-123591	byo-15-0	byo-15-7	NOTEST	0	0	0	0	1	1	no
Glyma0079s00320	Glyma0079s00320	Glyma0079s00320	scaffold_79:127744-128017	byo-15-0	byo-15-7	NOTEST	0	0	0	0	1	1	no
Glyma0079s00330	Glyma0079s00330	Glyma0079s00330	scaffold_79:128776-129055	byo-15-0	byo-15-7	NOTEST	0	0	0	0	1	1	no
Glyma0079s00340	Glyma0079s00340	Glyma0079s00340	scaffold_79:161645-161951	byo-15-0	byo-15-7	NOTEST	0	0	0	0	1	1	no
Glyma0079s00350	Glyma0079s00350	Glyma0079s00350	scaffold_79:164291-164540	byo-15-0	byo-15-7	NOTEST	0	0	0	0	1	1	no
Glyma0079s00360	Glyma0079s00360	Glyma0079s00360	scaffold_79:165133-166200	byo-15-0	byo-15-7	NOTEST	0.233583	0	-1.79769e+308	-1.79769e+308	0.0400455	1	no
Glyma0079s00370	Glyma0079s00370	Glyma0079s00370	scaffold_79:167220-167502	byo-15-0	byo-15-7	NOTEST	0	0	0	0	1	1	no
Glyma0080s50	Glyma0080s50	Glyma0080s50	scaffold_80:33970-43733	byo-15-0	byo-15-7	NOTEST	0	0.202493	1.79769e+308	1.79769e+308	0.028347	1	no
Glyma0084s00210	Glyma0084s00210	Glyma0084s00210	scaffold_84:12274-20446	byo-15-0	byo-15-7	OK	118.143	98.7212	-0.259103	0.478157	0.632539	0.918365	no
Glyma0084s00230	Glyma0084s00230	Glyma0084s00230	scaffold_84:53420-54224	byo-15-0	byo-15-7	NOTEST	0	0	0	0	1	1	no
Glyma0086s00200	Glyma0086s00200	Glyma0086s00200	scaffold_86:18942-19924	byo-15-0	byo-15-7	NOTEST	0	0	0	0	1	1	no
Glyma0086s00250	Glyma0086s00250	Glyma0086s00250	scaffold_86:40393-43241	byo-15-0	byo-15-7	NOTEST	0	0	0	0	1	1	no
Glyma0086s00300	Glyma0086s00300	Glyma0086s00300	scaffold_86:91106-93419	byo-15-0	byo-15-7	NOTEST	0	0	0	0	1	1	no
Glyma0090s00200	Glyma0090s00200	Glyma0090s00200	scaffold_90:4631-8816	byo-15-0	byo-15-7	NOTEST	0.31445	0.40555	0.367049	-0.474378	0.635231	1	no
Glyma0090s00250	Glyma0090s00250	Glyma0090s00250	scaffold_90:22827-24762	byo-15-0	byo-15-7	NOTEST	0	0	0	0	1	1	no
Glyma0090s00300	Glyma0090s00300	Glyma0090s00300	scaffold_90:24885-25615	byo-15-0	byo-15-7	NOTEST	0	0	0	0	1	1	no
Glyma0090s00350	Glyma0090s00350	Glyma0090s00350	scaffold_90:44125-48952	byo-15-0	byo-15-7	NOTEST	0.125519	0.203952	0.700319	-0.797519	0.42515	1	no
Glyma0091s00230	Glyma0091s00230	Glyma0091s00230	scaffold_91:29255-30661	byo-15-0	byo-15-7	NOTEST	0	0	0	0	1	1	no
Glyma0092s00200	Glyma0092s00200	Glyma0092s00200	scaffold_92:4798-6418	byo-15-0	byo-15-7	OK	0.524077	0.464593	-0.173811	0.200408	0.841161	0.970163	no
Glyma0092s00210	Glyma0092s00210	Glyma0092s00210	scaffold_92:9477-13080	byo-15-0	byo-15-7	OK	3.7735	11.2454	1.57536	-2.79032	0.00526565	0.0736385	no
Glyma0092s00230	Glyma0092s00230	Glyma0092s00230	scaffold_92:31216-33044	byo-15-0	byo-15-7	OK	15.9587	16.7913	0.0733681	-0.15514	0.876711	0.978066	no
Glyma0092s00240	Glyma0092s00240	Glyma0092s00240	scaffold_92:54198-55797	byo-15-0	byo-15-7	OK	11.7272	20.1667	0.782116	-1.64256	0.100474	0.448913	no
Glyma0096s100	Glyma0096s100	Glyma0096s100	scaffold_96:83938-84651	byo-15-0	byo-15-7	NOTEST	0	0	0	0	1	1	no
Glyma0096s50	Glyma0096s50	Glyma0096s50	scaffold_96:24926-29013	byo-15-0	byo-15-7	NOTEST	0	0	0	0	1	1	no
Glyma0101s00200	Glyma0101s00200	Glyma0101s00200	scaffold_101:409-679	byo-15-0	byo-15-7	NOTEST	0	0	0	0	1	1	no
Glyma0101s00210	Glyma0101s00210	Glyma0101s00210	scaffold_101:1190-2295	byo-15-0	byo-15-7	NOTEST	0	0	0	0	1	1	no
Glyma0101s00230	Glyma0101s00230	Glyma0101s00230	scaffold_101:16731-19812	byo-15-0	byo-15-7	NOTEST	0	0	0	0	1	1	no
Glyma0101s00241	Glyma0101s00241	Glyma0101s00241	scaffold_101:20750-20975	byo-15-0	byo-15-7	NOTEST	0	0	0	0	1	1	no
Glyma0101s00251	Glyma0101s00251	Glyma0101s00251	scaffold_101:42209-42999	byo-15-0	byo-15-7	NOTEST	0	0	0	0	1	1	no
Glyma0101s00260	Glyma0101s00260	Glyma0101s00260	scaffold_101:49116-50221	byo-15-0	byo-15-7	NOTEST	0	0	0	0	1	1	no
Glyma0103s100	Glyma0103s100	Glyma0103s100	scaffold_103:35985-36595	byo-15-0	byo-15-7	OK	1.43583	0.747929	-0.940912	0.990965	0.321703	0.748511	no
Glyma0103s50	Glyma0103s50	Glyma0103s50	scaffold_103:19207-24805	byo-15-0	byo-15-7	NOTEST	0.15136	0.240618	0.668755	-0.488498	0.625197	1	no
Glyma0120s50	Glyma0120s50	Glyma0120s50	scaffold_120:55294-60491	byo-15-0	byo-15-7	NOTEST	0	0	0	0	1	1	no
Glyma0121s00200	Glyma0121s00200	Glyma0121s00200	scaffold_121:11730-14225	byo-15-0	byo-15-7	NOTEST	0	0	0	0	1	1	no
Glyma0121s00230	Glyma0121s00230	Glyma0121s00230	scaffold_121:28095-29760	byo-15-0	byo-15-7	NOTEST	0	0	0	0	1	1	no
Glyma0121s00240	Glyma0121s00240	Glyma0121s00240	scaffold_121:38140-41744	byo-15-0	byo-15-7	NOTEST	0.00371985	0.0573819	3.94728	-0.348373	0.72756	1	no
Glyma0128s50	Glyma0128s50	Glyma0128s50	scaffold_128:8755-9643	byo-15-0	byo-15-7	NOTEST	0	0	0	0	1	1	no
Glyma0146s00210	Glyma0146s00210	Glyma0146s00210	scaffold_146:13454-14636	byo-15-0	byo-15-7	NOTEST	0	0	0	0	1	1	no
Glyma0165s00200	Glyma0165s00200	Glyma0165s00200	scaffold_165:18150-20209	byo-15-0	byo-15-7	NOTEST	0.017198	0.00996716	-0.786989	0.168329	0.866325	1	no
Glyma0165s50	Glyma0165s50	Glyma0165s50	scaffold_165:12356-14234	byo-15-0	byo-15-7	NOTEST	0	0	0	0	1	1	no
Glyma0169s00200	Glyma0169s00200	Glyma0169s00200	scaffold_169:6036-7668	byo-15-0	byo-15-7	OK	54.7349	67.5644	0.303801	-0.614757	0.538715	0.87843	no
Glyma0169s00210	Glyma0169s00210	Glyma0169s00210	scaffold_169:10271-14284	byo-15-0	byo-15-7	OK	164.654	130.233	-0.338342	0.570381	0.568419	0.891368	no
Glyma0174s50	Glyma0174s50	Glyma0174s50	scaffold_174:28-832	byo-15-0	byo-15-7	OK	0.746984	0.105219	-2.82768	1.54782	0.121665	0.495811	no
Glyma0175s50	Glyma0175s50	Glyma0175s50	scaffold_175:15261-16399	byo-15-0	byo-15-7	NOTEST	0	0	0	0	1	1	no
Glyma0196s00210	Glyma0196s00210	Glyma0196s00210	scaffold_196:12292-15573	byo-15-0	byo-15-7	NOTEST	0.178229	0.234447	0.395528	-0.434374	0.664017	1	no
Glyma0196s130	Glyma0196s130	Glyma0196s130	scaffold_196:9547-9835	byo-15-0	byo-15-7	NOTEST	0	0	0	0	1	1	no
Glyma0196s50	Glyma0196s50	Glyma0196s50	scaffold_196:6280-7448	byo-15-0	byo-15-7	NOTEST	0.146269	0.142852	-0.0341031	0.0191637	0.98471	1	no
Glyma01g00210	Glyma01g00210	Glyma01g00210	Gm01:27642-27977	byo-15-0	byo-15-7	OK	8.30387	2.27323	-1.86904	0.986234	0.324018	0.750576	no
Glyma01g00241	Glyma01g00241	Glyma01g00241	Gm01:28504-30546	byo-15-0	byo-15-7	NOTEST	0	0.232841	1.79769e+308	1.79769e+308	0.028347	1	no
Glyma01g00270	Glyma01g00270	Glyma01g00270	Gm01:51480-61502	byo-15-0	byo-15-7	NOTEST	0.216792	0.0484191	-2.16266	1.39285	0.163666	1	no
Glyma01g00280	Glyma01g00280	Glyma01g00280	Gm01:61964-63428	byo-15-0	byo-15-7	NOTEST	0	0	0	0	1	1	no
Glyma01g00291	Glyma01g00291	Glyma01g00291	Gm01:69968-71359	byo-15-0	byo-15-7	OK	0.920872	1.84507	1.0026	-1.2121	0.225476	0.654989	no
Glyma01g00300	Glyma01g00300	Glyma01g00300	Gm01:90229-96102	byo-15-0	byo-15-7	OK	5.29759	3.5513	-0.576991	1.15633	0.247545	0.682441	no
Glyma01g00311	Glyma01g00311	Glyma01g00311	Gm01:111565-114809	byo-15-0	byo-15-7	NOTEST	0	0	0	0	1	1	no
Glyma01g00321	Glyma01g00321	Glyma01g00321	Gm01:116191-128024	byo-15-0	byo-15-7	OK	2.8341	3.95831	0.481993	-0.944654	0.344836	0.766975	no
Glyma01g00341	Glyma01g00341	Glyma01g00341	Gm01:143352-155722	byo-15-0	byo-15-7	OK	0.82027	1.76315	1.10399	-1.30399	0.192236	0.612481	no
Glyma01g00361	Glyma01g00361	Glyma01g00361	Gm01:157174-157917	byo-15-0	byo-15-7	NOTEST	0	0	0	0	1	1	no
Glyma01g00380	Glyma01g00380	Glyma01g00380	Gm01:170678-193544	byo-15-0	byo-15-7	OK	3.35917	3.88958	0.211507	-0.416071	0.677358	0.932168	no
Glyma01g00400	Glyma01g00400	Glyma01g00400	Gm01:196374-202050	byo-15-0	byo-15-7	OK	13.0041	8.65184	-0.58789	1.01225	0.311419	0.740026	no
Glyma01g00410	Glyma01g00410	Glyma01g00410	Gm01:205593-226050	byo-15-0	byo-15-7	OK	25.8444	17.8636	-0.532826	1.0497	0.293857	0.726374	no
Glyma01g00420	Glyma01g00420	Glyma01g00420	Gm01:205593-226050	byo-15-0	byo-15-7	NOTEST	0.116354	0.327551	1.49321	-0.361617	0.717639	1	no
Glyma01g00430	Glyma01g00430	Glyma01g00430	Gm01:227158-238073	byo-15-0	byo-15-7	OK	33.9538	22.3759	-0.601627	1.15224	0.249222	0.68421	no
Glyma01g00440	Glyma01g00440	Glyma01g00440	Gm01:244255-244600	byo-15-0	byo-15-7	NOTEST	0	0	0	0	1	1	no
Glyma01g00450	Glyma01g00450	Glyma01g00450	Gm01:247079-274310	byo-15-0	byo-15-7	NOTEST	0	0	0	0	1	1	no
Glyma01g00460	Glyma01g00460	Glyma01g00460	Gm01:247079-274310	byo-15-0	byo-15-7	OK	1.04732	3.36459	1.68373	-2.12162	0.0338694	0.239956	no
Glyma01g00470	Glyma01g00470	Glyma01g00470	Gm01:247079-274310	byo-15-0	byo-15-7	OK	4.16183	6.13607	0.560095	-0.886284	0.375464	0.791565	no
Glyma01g00481	Glyma01g00481	Glyma01g00481	Gm01:275569-278576	byo-15-0	byo-15-7	NOTEST	0.0268099	0.0303456	0.178722	-0.103774	0.917349	1	no
Glyma01g00490	Glyma01g00490	Glyma01g00490	Gm01:281068-285680	byo-15-0	byo-15-7	NOTEST	0	0	0	0	1	1	no
Glyma01g00500	Glyma01g00500	Glyma01g00500	Gm01:285991-288741	byo-15-0	byo-15-7	OK	93.9696	118.808	0.338371	-0.671301	0.502029	0.861135	no
Glyma01g00510	Glyma01g00510	Glyma01g00510	Gm01:291440-297515	byo-15-0	byo-15-7	OK	3.79206	1.11266	-1.76897	3.01911	0.00253521	0.0450058	yes
Glyma01g00520	Glyma01g00520	Glyma01g00520	Gm01:303945-308194	byo-15-0	byo-15-7	OK	4.45568	2.92969	-0.604896	1.06491	0.286915	0.71982	no
Glyma01g00530	Glyma01g00530	Glyma01g00530	Gm01:318581-323172	byo-15-0	byo-15-7	NOTEST	0	0	0	0	1	1	no
Glyma01g00541	Glyma01g00541	Glyma01g00541	Gm01:329083-331923	byo-15-0	byo-15-7	OK	6.30959	3.28658	-0.940961	1.56024	0.118704	0.489007	no
Glyma01g00551	Glyma01g00551	Glyma01g00551	Gm01:333453-334355	byo-15-0	byo-15-7	NOTEST	0	0	0	0	1	1	no
Glyma01g00560	Glyma01g00560	Glyma01g00560	Gm01:335231-337098	byo-15-0	byo-15-7	OK	6.81409	8.45278	0.310906	-0.646781	0.517774	0.869395	no
Glyma01g00570	Glyma01g00570	Glyma01g00570	Gm01:339899-343391	byo-15-0	byo-15-7	OK	25.1684	20.3668	-0.305397	0.644135	0.519488	0.869741	no
Glyma01g00580	Glyma01g00580	Glyma01g00580	Gm01:344017-344620	byo-15-0	byo-15-7	NOTEST	0	0	0	0	1	1	no
Glyma01g00590	Glyma01g00590	Glyma01g00590	Gm01:346489-350011	byo-15-0	byo-15-7	OK	82.0409	43.1659	-0.92645	1.9231	0.0544678	0.317834	no
Glyma01g00600	Glyma01g00600	Glyma01g00600	Gm01:363275-365404	byo-15-0	byo-15-7	OK	29.1236	7.85064	-1.89131	3.85917	0.000113771	0.00453656	yes
Glyma01g00610	Glyma01g00610	Glyma01g00610	Gm01:369322-375842	byo-15-0	byo-15-7	OK	9.08766	10.9472	0.268578	-0.444224	0.65688	0.925259	no
Glyma01g00620	Glyma01g00620	Glyma01g00620	Gm01:369322-375842	byo-15-0	byo-15-7	NOTEST	0.101042	0.0575778	-0.811365	0.129181	0.897214	1	no
Glyma01g00640	Glyma01g00640	Glyma01g00640	Gm01:380015-381810	byo-15-0	byo-15-7	OK	8.18432	14.4381	0.818949	-1.71871	0.0856671	0.410542	no
Glyma01g00660	Glyma01g00660	Glyma01g00660	Gm01:384777-386898	byo-15-0	byo-15-7	NOTEST	0	0	0	0	1	1	no
Glyma01g00670	Glyma01g00670	Glyma01g00670	Gm01:387855-391000	byo-15-0	byo-15-7	OK	1.83659	4.18105	1.18684	-2.10079	0.035659	0.246459	no
Glyma01g00680	Glyma01g00680	Glyma01g00680	Gm01:391564-396978	byo-15-0	byo-15-7	OK	8.03716	6.20949	-0.37221	0.745168	0.45617	0.836545	no
Glyma01g00690	Glyma01g00690	Glyma01g00690	Gm01:397383-400581	byo-15-0	byo-15-7	OK	9.17836	15.8793	0.790842	-1.57205	0.115938	0.482138	no
Glyma01g00700	Glyma01g00700	Glyma01g00700	Gm01:411261-413277	byo-15-0	byo-15-7	NOTEST	0	0	0	0	1	1	no
Glyma01g00710	Glyma01g00710	Glyma01g00710	Gm01:415321-417655	byo-15-0	byo-15-7	NOTEST	0.0981256	0.0552023	-0.8299	0.396917	0.691428	1	no
Glyma01g00720	Glyma01g00720	Glyma01g00720	Gm01:418762-423973	byo-15-0	byo-15-7	OK	1.66048	2.0593	0.310553	-0.589709	0.555386	0.885631	no
Glyma01g00730	Glyma01g00730	Glyma01g00730	Gm01:425499-427881	byo-15-0	byo-15-7	OK	7.00434	16.3958	1.227	-2.07981	0.0375426	0.254058	no
Glyma01g00740	Glyma01g00740	Glyma01g00740	Gm01:429463-430748	byo-15-0	byo-15-7	OK	92.0474	129.946	0.497465	-0.96145	0.336326	0.7612	no
Glyma01g00750	Glyma01g00750	Glyma01g00750	Gm01:431176-433062	byo-15-0	byo-15-7	NOTEST	0.0448276	0.225633	2.33152	-1.63402	0.102255	1	no
Glyma01g00760	Glyma01g00760	Glyma01g00760	Gm01:434429-437563	byo-15-0	byo-15-7	OK	18.9035	18.5338	-0.0284947	0.0566646	0.954812	0.99147	no
Glyma01g00771	Glyma01g00771	Glyma01g00771	Gm01:438390-439678	byo-15-0	byo-15-7	OK	3.75973	2.79781	-0.42633	0.632544	0.527031	0.873598	no
Glyma01g00780	Glyma01g00780	Glyma01g00780	Gm01:441913-445194	byo-15-0	byo-15-7	OK	0.731628	1.00305	0.455208	-0.573284	0.566453	0.890373	no
Glyma01g00790	Glyma01g00790	Glyma01g00790	Gm01:446961-452958	byo-15-0	byo-15-7	NOTEST	0.0708046	0.0543617	-0.381253	0.333736	0.738578	1	no
Glyma01g00805	Glyma01g00805	Glyma01g00805	Gm01:457615-459673	byo-15-0	byo-15-7	NOTEST	0.0582928	0.0322507	-0.853986	0.408437	0.682953	1	no
Glyma01g00820	Glyma01g00820	Glyma01g00820	Gm01:464651-466721	byo-15-0	byo-15-7	OK	1.79247	3.10088	0.790726	-1.44028	0.149789	0.548417	no
Glyma01g00840	Glyma01g00840	Glyma01g00840	Gm01:505341-508290	byo-15-0	byo-15-7	NOTEST	0.0710393	0.0417232	-0.767768	0.240523	0.809925	1	no
Glyma01g00850	Glyma01g00850	Glyma01g00850	Gm01:512025-517266	byo-15-0	byo-15-7	OK	2.58964	4.5372	0.809047	-1.5862	0.112695	0.474994	no
Glyma01g00860	Glyma01g00860	Glyma01g00860	Gm01:518296-520313	byo-15-0	byo-15-7	OK	13.1386	12.8553	-0.0314474	0.0574135	0.954216	0.991449	no
Glyma01g00870	Glyma01g00870	Glyma01g00870	Gm01:523808-529106	byo-15-0	byo-15-7	OK	16.2392	13.7925	-0.235602	0.42826	0.668462	0.929507	no
Glyma01g00880	Glyma01g00880	Glyma01g00880	Gm01:544620-550750	byo-15-0	byo-15-7	NOTEST	0.05872	0.244152	2.05585	-1.65418	0.0980903	1	no
Glyma01g00890	Glyma01g00890	Glyma01g00890	Gm01:559624-561661	byo-15-0	byo-15-7	NOTEST	0.155866	0.0215079	-2.85737	1.56407	0.1178	1	no
Glyma01g00900	Glyma01g00900	Glyma01g00900	Gm01:562674-567038	byo-15-0	byo-15-7	NOTEST	0.134969	0	-1.79769e+308	-1.79769e+308	0.124059	1	no
Glyma01g00910	Glyma01g00910	Glyma01g00910	Gm01:567202-572032	byo-15-0	byo-15-7	NOTEST	0.183263	0	-1.79769e+308	-1.79769e+308	0.0146834	1	no
Glyma01g00920	Glyma01g00920	Glyma01g00920	Gm01:576437-580149	byo-15-0	byo-15-7	NOTEST	0	0	0	0	1	1	no
Glyma01g00930	Glyma01g00930	Glyma01g00930	Gm01:585699-587056	byo-15-0	byo-15-7	OK	0.266883	0.748691	1.48816	-1.50011	0.133586	0.517749	no
Glyma01g00940	Glyma01g00940	Glyma01g00940	Gm01:588160-598604	byo-15-0	byo-15-7	OK	37.9539	24.0551	-0.65791	1.31602	0.188168	0.606856	no
Glyma01g00950	Glyma01g00950	Glyma01g00950	Gm01:598924-599925	byo-15-0	byo-15-7	OK	0.969191	2.41895	1.31953	-1.7833	0.0745381	0.378186	no
Glyma01g00960	Glyma01g00960	Glyma01g00960	Gm01:604191-612760	byo-15-0	byo-15-7	OK	7.09442	12.1312	0.773971	-1.50121	0.133301	0.51742	no
Glyma01g00975	Glyma01g00975	Glyma01g00975	Gm01:613982-641941	byo-15-0	byo-15-7	OK	1.03847	1.29254	0.315744	-0.53855	0.590197	0.900304	no
Glyma01g00990	Glyma01g00990	Glyma01g00990	Gm01:643213-651111	byo-15-0	byo-15-7	OK	2.11733	2.17622	0.0395769	-0.0787809	0.937207	0.989023	no
Glyma01g01000	Glyma01g01000	Glyma01g01000	Gm01:652294-658333	byo-15-0	byo-15-7	OK	27.0999	25.0697	-0.112345	0.213816	0.830691	0.967353	no
Glyma01g01010	Glyma01g01010	Glyma01g01010	Gm01:663901-668594	byo-15-0	byo-15-7	OK	0.862113	0.124178	-2.79546	2.77667	0.00549189	0.075915	no
Glyma01g01020	Glyma01g01020	Glyma01g01020	Gm01:670826-674335	byo-15-0	byo-15-7	OK	38.0531	34.6548	-0.134959	0.270016	0.787148	0.95816	no
Glyma01g01030	Glyma01g01030	Glyma01g01030	Gm01:681416-683646	byo-15-0	byo-15-7	NOTEST	0.192473	0.174689	-0.139862	0.141507	0.88747	1	no
Glyma01g01050	Glyma01g01050	Glyma01g01050	Gm01:706987-708399	byo-15-0	byo-15-7	NOTEST	0.0430301	0.0705244	0.712778	-0.451026	0.651971	1	no
Glyma01g01060	Glyma01g01060	Glyma01g01060	Gm01:729658-735082	byo-15-0	byo-15-7	OK	7.48135	7.57425	0.017804	-0.037373	0.970188	0.994393	no
Glyma01g01070	Glyma01g01070	Glyma01g01070	Gm01:735854-740661	byo-15-0	byo-15-7	NOTEST	0.0949217	0.161507	0.766782	-0.738611	0.460143	1	no
Glyma01g01080	Glyma01g01080	Glyma01g01080	Gm01:741674-745361	byo-15-0	byo-15-7	OK	0.718072	0.754701	0.0717769	-0.108366	0.913705	0.984387	no
Glyma01g01090	Glyma01g01090	Glyma01g01090	Gm01:746504-750472	byo-15-0	byo-15-7	NOTEST	0.0642473	0.215545	1.74628	-1.78438	0.0743613	1	no
Glyma01g01101	Glyma01g01101	Glyma01g01101	Gm01:752181-756473	byo-15-0	byo-15-7	NOTEST	0	0	0	0	1	1	no
Glyma01g01110	Glyma01g01110	Glyma01g01110	Gm01:757751-761280	byo-15-0	byo-15-7	OK	6.8733	7.99801	0.218639	-0.46222	0.643924	0.921536	no
Glyma01g01120	Glyma01g01120	Glyma01g01120	Gm01:762982-771636	byo-15-0	byo-15-7	OK	0.610698	0.542567	-0.170656	0.241126	0.809457	0.963731	no
Glyma01g01130	Glyma01g01130	Glyma01g01130	Gm01:773986-783534	byo-15-0	byo-15-7	NOTEST	0	0	0	0	1	1	no
Glyma01g01140	Glyma01g01140	Glyma01g01140	Gm01:773986-783534	byo-15-0	byo-15-7	OK	2.72902	4.08239	0.581032	-0.924416	0.35527	0.775302	no
Glyma01g01150	Glyma01g01150	Glyma01g01150	Gm01:786786-790850	byo-15-0	byo-15-7	NOTEST	0.431561	0.448639	0.0559897	-0.0651772	0.948033	1	no
Glyma01g01160	Glyma01g01160	Glyma01g01160	Gm01:801794-812173	byo-15-0	byo-15-7	NOTEST	0.0172387	0.0197112	0.193363	-0.112275	0.910605	1	no
Glyma01g01165	Glyma01g01165	Glyma01g01165	Gm01:813195-815449	byo-15-0	byo-15-7	NOTEST	0	0	0	0	1	1	no
Glyma01g01170	Glyma01g01170	Glyma01g01170	Gm01:817680-822876	byo-15-0	byo-15-7	OK	1.95529	2.0339	0.0568697	-0.078709	0.937264	0.989023	no
Glyma01g01180	Glyma01g01180	Glyma01g01180	Gm01:826828-831862	byo-15-0	byo-15-7	OK	49.5229	40.6418	-0.28513	0.545964	0.585091	0.898336	no
Glyma01g01190	Glyma01g01190	Glyma01g01190	Gm01:837437-839839	byo-15-0	byo-15-7	OK	10.4089	13.8331	0.410302	-0.856529	0.391705	0.801406	no
Glyma01g01210	Glyma01g01210	Glyma01g01210	Gm01:841603-854009	byo-15-0	byo-15-7	NOTEST	0.208238	0.221096	0.0864409	-0.100917	0.919617	1	no
Glyma01g01220	Glyma01g01220	Glyma01g01220	Gm01:861697-864316	byo-15-0	byo-15-7	OK	10.028	16.4566	0.714625	-1.2435	0.213684	0.639951	no
Glyma01g01230	Glyma01g01230	Glyma01g01230	Gm01:864945-873519	byo-15-0	byo-15-7	OK	1.88732	2.43262	0.366177	-0.690842	0.489665	0.85465	no
Glyma01g01240	Glyma01g01240	Glyma01g01240	Gm01:882373-883583	byo-15-0	byo-15-7	OK	0.412436	0.723811	0.811445	-0.946418	0.343935	0.766865	no
Glyma01g01251	Glyma01g01251	Glyma01g01251	Gm01:897328-899783	byo-15-0	byo-15-7	NOTEST	0.0164268	0.00849214	-0.951849	0.275763	0.78273	1	no
Glyma01g01260	Glyma01g01260	Glyma01g01260	Gm01:901470-902792	byo-15-0	byo-15-7	OK	28.2228	46.6279	0.724333	-1.51611	0.129493	0.51038	no
Glyma01g01270	Glyma01g01270	Glyma01g01270	Gm01:908126-916913	byo-15-0	byo-15-7	OK	15.4781	18.8825	0.286818	-0.597353	0.550271	0.883331	no
Glyma01g01280	Glyma01g01280	Glyma01g01280	Gm01:919766-925870	byo-15-0	byo-15-7	OK	0.979036	1.85593	0.922704	-1.64574	0.0998182	0.447019	no
Glyma01g01291	Glyma01g01291	Glyma01g01291	Gm01:934414-936646	byo-15-0	byo-15-7	NOTEST	0.215622	0.373039	0.790823	-0.761769	0.446198	1	no
Glyma01g01300	Glyma01g01300	Glyma01g01300	Gm01:937313-940538	byo-15-0	byo-15-7	OK	0.412577	1.11431	1.43342	-1.76333	0.0778457	0.387323	no
Glyma01g01310	Glyma01g01310	Glyma01g01310	Gm01:952468-956652	byo-15-0	byo-15-7	NOTEST	0.181554	0.0815421	-1.15478	1.11974	0.262825	1	no
Glyma01g01330	Glyma01g01330	Glyma01g01330	Gm01:959531-963281	byo-15-0	byo-15-7	OK	14.001	13.1399	-0.0915749	0.186934	0.851712	0.972751	no
Glyma01g01340	Glyma01g01340	Glyma01g01340	Gm01:966937-971332	byo-15-0	byo-15-7	OK	18.4162	12.403	-0.570288	1.20377	0.228678	0.6591	no
Glyma01g01350	Glyma01g01350	Glyma01g01350	Gm01:972898-978372	byo-15-0	byo-15-7	OK	2.10799	1.8834	-0.162529	0.270422	0.786836	0.958097	no
Glyma01g01360	Glyma01g01360	Glyma01g01360	Gm01:980271-987366	byo-15-0	byo-15-7	OK	2.43489	1.94754	-0.322206	0.581061	0.5612	0.887884	no
Glyma01g01365	Glyma01g01365	Glyma01g01365	Gm01:991596-992349	byo-15-0	byo-15-7	NOTEST	0	0	0	0	1	1	no
Glyma01g01370	Glyma01g01370	Glyma01g01370	Gm01:992662-997177	byo-15-0	byo-15-7	OK	1471.08	1015.24	-0.535058	0.558784	0.576309	0.894567	no
Glyma01g01380	Glyma01g01380	Glyma01g01380	Gm01:1000826-1006591	byo-15-0	byo-15-7	OK	15.4543	10.4258	-0.567843	1.11466	0.264995	0.699045	no
Glyma01g01390	Glyma01g01390	Glyma01g01390	Gm01:1008758-1013501	byo-15-0	byo-15-7	OK	7.78492	27.7644	1.83448	-3.77105	0.00016256	0.00598335	yes
Glyma01g01400	Glyma01g01400	Glyma01g01400	Gm01:1018233-1021659	byo-15-0	byo-15-7	OK	11.6073	7.00281	-0.729023	1.52983	0.126059	0.503234	no
Glyma01g01410	Glyma01g01410	Glyma01g01410	Gm01:1023044-1025742	byo-15-0	byo-15-7	OK	74.4022	70.75	-0.0726156	0.14843	0.882003	0.979254	no
Glyma01g01420	Glyma01g01420	Glyma01g01420	Gm01:1028982-1033386	byo-15-0	byo-15-7	NOTEST	0.0696722	0.0133697	-2.38162	1.28906	0.197379	1	no
Glyma01g01431	Glyma01g01431	Glyma01g01431	Gm01:1035987-1043507	byo-15-0	byo-15-7	OK	0.867355	1.22562	0.49882	-0.752978	0.451463	0.833997	no
Glyma01g01440	Glyma01g01440	Glyma01g01440	Gm01:1047147-1051040	byo-15-0	byo-15-7	OK	13.1985	10.2605	-0.363272	0.599698	0.548707	0.882287	no
Glyma01g01450	Glyma01g01450	Glyma01g01450	Gm01:1052601-1053493	byo-15-0	byo-15-7	OK	0.238117	0.958143	2.00857	-1.86319	0.062435	0.343691	no
Glyma01g01460	Glyma01g01460	Glyma01g01460	Gm01:1056819-1061665	byo-15-0	byo-15-7	OK	12.5279	12.0391	-0.0574177	0.121193	0.903538	0.982856	no
Glyma01g01470	Glyma01g01470	Glyma01g01470	Gm01:1066130-1073350	byo-15-0	byo-15-7	OK	4.5069	4.39442	-0.0364653	0.0761249	0.93932	0.989323	no
Glyma01g01480	Glyma01g01480	Glyma01g01480	Gm01:1088031-1090516	byo-15-0	byo-15-7	OK	22.6691	14.4132	-0.653334	1.35668	0.174884	0.586873	no
Glyma01g01491	Glyma01g01491	Glyma01g01491	Gm01:1091316-1094909	byo-15-0	byo-15-7	OK	0.241211	0.683863	1.50341	-1.61378	0.106576	0.462957	no
Glyma01g01500	Glyma01g01500	Glyma01g01500	Gm01:1095456-1099007	byo-15-0	byo-15-7	NOTEST	0	0	0	0	1	1	no
Glyma01g01510	Glyma01g01510	Glyma01g01510	Gm01:1125596-1130365	byo-15-0	byo-15-7	OK	0.317089	1.23744	1.96439	-2.55944	0.0104841	0.116249	no
Glyma01g01521	Glyma01g01521	Glyma01g01521	Gm01:1133845-1137317	byo-15-0	byo-15-7	OK	1.13932	0.775937	-0.554161	0.674388	0.500065	0.8599	no
Glyma01g01530	Glyma01g01530	Glyma01g01530	Gm01:1138207-1139962	byo-15-0	byo-15-7	NOTEST	0	0	0	0	1	1	no
Glyma01g01550	Glyma01g01550	Glyma01g01550	Gm01:1143928-1150404	byo-15-0	byo-15-7	NOTEST	0.0841805	0	-1.79769e+308	-1.79769e+308	0.0315054	1	no
Glyma01g01560	Glyma01g01560	Glyma01g01560	Gm01:1160591-1165098	byo-15-0	byo-15-7	NOTEST	0.0347055	0.048562	0.484664	-0.408857	0.682645	1	no
Glyma01g01570	Glyma01g01570	Glyma01g01570	Gm01:1165649-1171110	byo-15-0	byo-15-7	NOTEST	0.410893	0.0769976	-2.41588	2.37481	0.017558	1	no
Glyma01g01580	Glyma01g01580	Glyma01g01580	Gm01:1185427-1188776	byo-15-0	byo-15-7	NOTEST	0	0	0	0	1	1	no
Glyma01g01590	Glyma01g01590	Glyma01g01590	Gm01:1196921-1198375	byo-15-0	byo-15-7	OK	3.05618	3.58467	0.230112	-0.27681	0.781926	0.957162	no
Glyma01g01601	Glyma01g01601	Glyma01g01601	Gm01:1201663-1205929	byo-15-0	byo-15-7	OK	14.3292	14.5322	0.0202891	-0.0429293	0.965758	0.993281	no
Glyma01g01610	Glyma01g01610	Glyma01g01610	Gm01:1207927-1212597	byo-15-0	byo-15-7	OK	7.83203	9.08304	0.213788	-0.452236	0.651099	0.923722	no
Glyma01g01620	Glyma01g01620	Glyma01g01620	Gm01:1215172-1220713	byo-15-0	byo-15-7	NOTEST	0	0.0501712	1.79769e+308	1.79769e+308	0.145983	1	no
Glyma01g01630	Glyma01g01630	Glyma01g01630	Gm01:1224165-1228877	byo-15-0	byo-15-7	NOTEST	0	0.0917318	1.79769e+308	1.79769e+308	0.0376023	1	no
Glyma01g01641	Glyma01g01641	Glyma01g01641	Gm01:1231917-1233070	byo-15-0	byo-15-7	NOTEST	0	0	0	0	1	1	no
Glyma01g01651	Glyma01g01651	Glyma01g01651	Gm01:1235950-1236741	byo-15-0	byo-15-7	NOTEST	0.133587	0	-1.79769e+308	-1.79769e+308	0.124059	1	no
Glyma01g01661	Glyma01g01661	Glyma01g01661	Gm01:1237990-1239189	byo-15-0	byo-15-7	OK	11.2488	11.7704	0.0653989	-0.0650758	0.948114	0.990962	no
Glyma01g01671	Glyma01g01671	Glyma01g01671	Gm01:1237990-1239189	byo-15-0	byo-15-7	OK	1.00012	3.94923	1.9814	-0.932291	0.351186	0.77186	no
Glyma01g01680	Glyma01g01680	Glyma01g01680	Gm01:1241352-1245024	byo-15-0	byo-15-7	NOTEST	0.0179709	0	-1.79769e+308	-1.79769e+308	0.124059	1	no
Glyma01g01690	Glyma01g01690	Glyma01g01690	Gm01:1252980-1257657	byo-15-0	byo-15-7	NOTEST	0	0	0	0	1	1	no
Glyma01g01700	Glyma01g01700	Glyma01g01700	Gm01:1273194-1280313	byo-15-0	byo-15-7	NOTEST	0	0	0	0	1	1	no
Glyma01g01715	Glyma01g01715	Glyma01g01715	Gm01:1283531-1285362	byo-15-0	byo-15-7	NOTEST	0	0	0	0	1	1	no
Glyma01g01730	Glyma01g01730	Glyma01g01730	Gm01:1289360-1298217	byo-15-0	byo-15-7	OK	1.68133	5.47412	1.70302	-3.1548	0.00160606	0.0330806	yes
Glyma01g01740	Glyma01g01740	Glyma01g01740	Gm01:1307387-1317730	byo-15-0	byo-15-7	OK	2.227	3.01748	0.438242	-0.779303	0.435801	0.826938	no
Glyma01g01750	Glyma01g01750	Glyma01g01750	Gm01:1319394-1322259	byo-15-0	byo-15-7	OK	1.63862	3.50048	1.09507	-2.07401	0.0380783	0.256456	no
Glyma01g01770	Glyma01g01770	Glyma01g01770	Gm01:1332992-1336611	byo-15-0	byo-15-7	OK	9.10379	8.58587	-0.0845023	0.1527	0.878635	0.978557	no
Glyma01g01780	Glyma01g01780	Glyma01g01780	Gm01:1342969-1347966	byo-15-0	byo-15-7	OK	0.149476	0.653076	2.12734	-2.51901	0.0117684	0.124666	no
Glyma01g01790	Glyma01g01790	Glyma01g01790	Gm01:1357260-1362758	byo-15-0	byo-15-7	NOTEST	0.387917	0.184188	-1.07457	1.13961	0.254447	1	no
Glyma01g01805	Glyma01g01805	Glyma01g01805	Gm01:1377132-1387290	byo-15-0	byo-15-7	OK	4.99992	2.68009	-0.899623	1.61809	0.105643	0.46096	no
Glyma01g01820	Glyma01g01820	Glyma01g01820	Gm01:1391664-1392341	byo-15-0	byo-15-7	NOTEST	0	0	0	0	1	1	no
Glyma01g01830	Glyma01g01830	Glyma01g01830	Gm01:1394336-1398687	byo-15-0	byo-15-7	OK	23.2526	16.283	-0.514026	1.02039	0.307545	0.737536	no
Glyma01g01840	Glyma01g01840	Glyma01g01840	Gm01:1399714-1403226	byo-15-0	byo-15-7	OK	2.32654	2.27706	-0.0310149	0.0436415	0.96519	0.993281	no
Glyma01g01850	Glyma01g01850	Glyma01g01850	Gm01:1409321-1416077	byo-15-0	byo-15-7	OK	0.905623	0.725211	-0.32051	0.498225	0.618326	0.912342	no
Glyma01g01860	Glyma01g01860	Glyma01g01860	Gm01:1432595-1439227	byo-15-0	byo-15-7	OK	3.0799	1.20342	-1.35575	2.1683	0.0301358	0.224177	no
Glyma01g01875	Glyma01g01875	Glyma01g01875	Gm01:1464340-1468599	byo-15-0	byo-15-7	OK	6.72204	5.70173	-0.237499	0.440991	0.659219	0.925854	no
Glyma01g01890	Glyma01g01890	Glyma01g01890	Gm01:1483775-1488285	byo-15-0	byo-15-7	OK	19.3084	15.4672	-0.320019	0.675309	0.499479	0.859613	no
Glyma01g01900	Glyma01g01900	Glyma01g01900	Gm01:1489317-1495820	byo-15-0	byo-15-7	OK	15.4414	16.0039	0.0516266	-0.0977003	0.92217	0.985888	no
Glyma01g01910	Glyma01g01910	Glyma01g01910	Gm01:1500824-1504087	byo-15-0	byo-15-7	OK	170.846	153.534	-0.154137	0.22762	0.819942	0.96564	no
Glyma01g01920	Glyma01g01920	Glyma01g01920	Gm01:1504880-1510358	byo-15-0	byo-15-7	NOTEST	0.0876511	0.112532	0.360487	-0.360181	0.718712	1	no
Glyma01g01930	Glyma01g01930	Glyma01g01930	Gm01:1511111-1512857	byo-15-0	byo-15-7	OK	3.37583	2.08846	-0.692805	0.940404	0.347011	0.768767	no
Glyma01g01940	Glyma01g01940	Glyma01g01940	Gm01:1514417-1515781	byo-15-0	byo-15-7	OK	10.9604	6.38342	-0.7799	1.51872	0.128833	0.509013	no
Glyma01g01950	Glyma01g01950	Glyma01g01950	Gm01:1520439-1523995	byo-15-0	byo-15-7	OK	12.815	13.6815	0.0943948	-0.198582	0.84259	0.970418	no
Glyma01g01960	Glyma01g01960	Glyma01g01960	Gm01:1526003-1531395	byo-15-0	byo-15-7	OK	1.9732	0.656247	-1.58823	2.26438	0.023551	0.192556	no
Glyma01g01970	Glyma01g01970	Glyma01g01970	Gm01:1532782-1536385	byo-15-0	byo-15-7	OK	1.40183	2.23643	0.673888	-0.726933	0.467267	0.842071	no
Glyma01g01980	Glyma01g01980	Glyma01g01980	Gm01:1537139-1538153	byo-15-0	byo-15-7	NOTEST	0.0786488	0	-1.79769e+308	-1.79769e+308	0.124059	1	no
Glyma01g01990	Glyma01g01990	Glyma01g01990	Gm01:1540562-1544363	byo-15-0	byo-15-7	OK	5.34565	5.07214	-0.0757716	0.156508	0.875632	0.977703	no
Glyma01g02020	Glyma01g02020	Glyma01g02020	Gm01:1547972-1555699	byo-15-0	byo-15-7	LOWDATA	0.164762	0.753747	2.1937	0	1	1	no
Glyma01g02031	Glyma01g02031	Glyma01g02031	Gm01:1547972-1555699	byo-15-0	byo-15-7	NOTEST	0.0929682	0.395497	2.08886	-2.34331	0.0191136	1	no
Glyma01g02040	Glyma01g02040	Glyma01g02040	Gm01:1558849-1560186	byo-15-0	byo-15-7	OK	5.23351	2.84342	-0.88015	1.28399	0.199145	0.619977	no
Glyma01g02050	Glyma01g02050	Glyma01g02050	Gm01:1564664-1568931	byo-15-0	byo-15-7	OK	1.97649	1.85559	-0.0910653	0.111817	0.910969	0.983817	no
Glyma01g02060	Glyma01g02060	Glyma01g02060	Gm01:1577696-1587475	byo-15-0	byo-15-7	OK	8.86259	6.08606	-0.54222	1.13774	0.25523	0.691095	no
Glyma01g02070	Glyma01g02070	Glyma01g02070	Gm01:1596899-1599449	byo-15-0	byo-15-7	NOTEST	0.120911	0.33149	1.45503	-1.30984	0.190251	1	no
Glyma01g02080	Glyma01g02080	Glyma01g02080	Gm01:1603349-1604459	byo-15-0	byo-15-7	NOTEST	0	0	0	0	1	1	no
Glyma01g02090	Glyma01g02090	Glyma01g02090	Gm01:1613117-1616592	byo-15-0	byo-15-7	OK	21.2472	20.8465	-0.0274697	0.0579892	0.953757	0.991449	no
Glyma01g02100	Glyma01g02100	Glyma01g02100	Gm01:1618639-1623534	byo-15-0	byo-15-7	OK	3.3037	4.62216	0.484484	-0.966855	0.333617	0.758823	no
Glyma01g02110	Glyma01g02110	Glyma01g02110	Gm01:1626846-1628287	byo-15-0	byo-15-7	OK	4.99859	2.76257	-0.855509	1.42541	0.154038	0.556039	no
Glyma01g02120	Glyma01g02120	Glyma01g02120	Gm01:1633690-1637207	byo-15-0	byo-15-7	OK	17.0869	7.63331	-1.16251	2.39695	0.0165322	0.154148	no
Glyma01g02130	Glyma01g02130	Glyma01g02130	Gm01:1642576-1643443	byo-15-0	byo-15-7	NOTEST	0	0	0	0	1	1	no
Glyma01g02140	Glyma01g02140	Glyma01g02140	Gm01:1648084-1649989	byo-15-0	byo-15-7	NOTEST	0	0.169181	1.79769e+308	1.79769e+308	0.0348784	1	no
Glyma01g02150	Glyma01g02150	Glyma01g02150	Gm01:1653306-1656923	byo-15-0	byo-15-7	OK	31.4981	39.7662	0.336277	-0.689204	0.490695	0.854821	no
Glyma01g02160	Glyma01g02160	Glyma01g02160	Gm01:1662473-1663732	byo-15-0	byo-15-7	NOTEST	0	0	0	0	1	1	no
Glyma01g02171	Glyma01g02171	Glyma01g02171	Gm01:1673102-1673545	byo-15-0	byo-15-7	NOTEST	0	0	0	0	1	1	no
Glyma01g02180	Glyma01g02180	Glyma01g02180	Gm01:1688059-1691046	byo-15-0	byo-15-7	OK	31.705	14.0807	-1.171	2.42397	0.0153518	0.147609	no
Glyma01g02190	Glyma01g02190	Glyma01g02190	Gm01:1721264-1722533	byo-15-0	byo-15-7	OK	7.35364	3.66559	-1.00441	1.65782	0.0973543	0.440501	no
Glyma01g02200	Glyma01g02200	Glyma01g02200	Gm01:1733389-1734562	byo-15-0	byo-15-7	OK	6.08596	10.0302	0.720788	-1.41522	0.157004	0.561927	no
Glyma01g02215	Glyma01g02215	Glyma01g02215	Gm01:1735229-1736763	byo-15-0	byo-15-7	OK	3.72345	27.049	2.86086	-4.31268	1.61288e-05	0.00099928	yes
Glyma01g02230	Glyma01g02230	Glyma01g02230	Gm01:1744296-1745378	byo-15-0	byo-15-7	OK	18.8344	1.31038	-3.84531	5.2781	1.30532e-07	1.98754e-05	yes
Glyma01g02235	Glyma01g02235	Glyma01g02235	Gm01:1747643-1748703	byo-15-0	byo-15-7	NOTEST	0	0	0	0	1	1	no
Glyma01g02240	Glyma01g02240	Glyma01g02240	Gm01:1748705-1753242	byo-15-0	byo-15-7	OK	1.61494	1.82833	0.17904	-0.314506	0.753137	0.952748	no
Glyma01g02251	Glyma01g02251	Glyma01g02251	Gm01:1771935-1773875	byo-15-0	byo-15-7	OK	21.2918	16.2274	-0.391867	0.800244	0.42357	0.820306	no
Glyma01g02260	Glyma01g02260	Glyma01g02260	Gm01:1781864-1782671	byo-15-0	byo-15-7	NOTEST	0.313129	0	-1.79769e+308	-1.79769e+308	0.0315054	1	no
Glyma01g02270	Glyma01g02270	Glyma01g02270	Gm01:1782704-1786280	byo-15-0	byo-15-7	OK	1.81223	1.13495	-0.675134	0.805471	0.420548	0.81831	no
Glyma01g02280	Glyma01g02280	Glyma01g02280	Gm01:1788990-1791158	byo-15-0	byo-15-7	OK	4.62958	5.64615	0.286386	-0.571496	0.567663	0.891235	no
Glyma01g02290	Glyma01g02290	Glyma01g02290	Gm01:1803011-1804370	byo-15-0	byo-15-7	OK	5.57458	5.47067	-0.0271471	0.0532606	0.957524	0.992105	no
Glyma01g02295	Glyma01g02295	Glyma01g02295	Gm01:1813531-1816390	byo-15-0	byo-15-7	NOTEST	0	0	0	0	1	1	no
Glyma01g02300	Glyma01g02300	Glyma01g02300	Gm01:1817115-1820935	byo-15-0	byo-15-7	NOTEST	0.260137	0.145488	-0.83837	0.833512	0.404556	1	no
Glyma01g02310	Glyma01g02310	Glyma01g02310	Gm01:1822915-1823629	byo-15-0	byo-15-7	NOTEST	0	0	0	0	1	1	no
Glyma01g02321	Glyma01g02321	Glyma01g02321	Gm01:1825753-1835393	byo-15-0	byo-15-7	OK	11.8326	9.51792	-0.314049	0.593709	0.552707	0.884254	no
Glyma01g02330	Glyma01g02330	Glyma01g02330	Gm01:1838125-1845872	byo-15-0	byo-15-7	OK	1.15397	1.26512	0.132659	-0.2177	0.827663	0.966534	no
Glyma01g02340	Glyma01g02340	Glyma01g02340	Gm01:1865275-1868142	byo-15-0	byo-15-7	OK	2.87244	0.915208	-1.6501	2.91861	0.00351595	0.0563095	no
Glyma01g02350	Glyma01g02350	Glyma01g02350	Gm01:1886187-1890464	byo-15-0	byo-15-7	OK	4.93888	3.90789	-0.337794	0.629654	0.528921	0.874515	no
Glyma01g02360	Glyma01g02360	Glyma01g02360	Gm01:1905414-1906471	byo-15-0	byo-15-7	OK	0.179669	3.41123	4.24688	-4.28035	1.86601e-05	0.0011204	yes
Glyma01g02380	Glyma01g02380	Glyma01g02380	Gm01:1929549-1932204	byo-15-0	byo-15-7	OK	0.370059	1.23425	1.7378	-2.36359	0.0180989	0.163596	no
Glyma01g02390	Glyma01g02390	Glyma01g02390	Gm01:1940680-1942652	byo-15-0	byo-15-7	OK	1.48178	0.224984	-2.71943	3.08024	0.00206836	0.0395735	yes
Glyma01g02400	Glyma01g02400	Glyma01g02400	Gm01:1969464-1975586	byo-15-0	byo-15-7	OK	28.4887	39.1033	0.456901	-0.828446	0.407418	0.810541	no
Glyma01g02420	Glyma01g02420	Glyma01g02420	Gm01:1977639-1982632	byo-15-0	byo-15-7	OK	3.168	5.80925	0.874778	-1.66772	0.095372	0.43615	no
Glyma01g02435	Glyma01g02435	Glyma01g02435	Gm01:1989327-1993130	byo-15-0	byo-15-7	NOTEST	0	0	0	0	1	1	no
Glyma01g02451	Glyma01g02451	Glyma01g02451	Gm01:1998300-2009388	byo-15-0	byo-15-7	NOTEST	0.0393858	0.0448305	0.186805	-0.0606684	0.951623	1	no
Glyma01g02465	Glyma01g02465	Glyma01g02465	Gm01:1998300-2009388	byo-15-0	byo-15-7	OK	6.40489	6.64292	0.0526432	-0.0761524	0.939298	0.989323	no
Glyma01g02480	Glyma01g02480	Glyma01g02480	Gm01:2010099-2018636	byo-15-0	byo-15-7	OK	42.5727	36.2961	-0.230114	0.438732	0.660855	0.926322	no
Glyma01g02510	Glyma01g02510	Glyma01g02510	Gm01:2033797-2034792	byo-15-0	byo-15-7	NOTEST	0.0944516	0.108269	0.196973	-0.114371	0.908943	1	no
Glyma01g02525	Glyma01g02525	Glyma01g02525	Gm01:2038298-2054214	byo-15-0	byo-15-7	NOTEST	0	0	0	0	1	1	no
Glyma01g02540	Glyma01g02540	Glyma01g02540	Gm01:2065426-2066242	byo-15-0	byo-15-7	NOTEST	0	0	0	0	1	1	no
Glyma01g02550	Glyma01g02550	Glyma01g02550	Gm01:2067340-2068207	byo-15-0	byo-15-7	NOTEST	0	0	0	0	1	1	no
Glyma01g02560	Glyma01g02560	Glyma01g02560	Gm01:2089449-2097520	byo-15-0	byo-15-7	NOTEST	0.0285027	0	-1.79769e+308	-1.79769e+308	0.124059	1	no
Glyma01g02570	Glyma01g02570	Glyma01g02570	Gm01:2102150-2107115	byo-15-0	byo-15-7	OK	3.99174	0.457656	-3.12468	4.34763	1.37616e-05	0.000880689	yes
Glyma01g02580	Glyma01g02580	Glyma01g02580	Gm01:2119856-2122838	byo-15-0	byo-15-7	OK	0.6682	5.03865	2.91469	-4.33791	1.43845e-05	0.000911173	yes
Glyma01g02610	Glyma01g02610	Glyma01g02610	Gm01:2137616-2139436	byo-15-0	byo-15-7	NOTEST	0.297061	0.181305	-0.712337	0.766456	0.443405	1	no
Glyma01g02620	Glyma01g02620	Glyma01g02620	Gm01:2146050-2152449	byo-15-0	byo-15-7	NOTEST	0.0882407	0.0712369	-0.308819	0.307494	0.758467	1	no
Glyma01g02630	Glyma01g02630	Glyma01g02630	Gm01:2156930-2161301	byo-15-0	byo-15-7	OK	5.96857	5.21182	-0.195598	0.382122	0.702371	0.939587	no
Glyma01g02640	Glyma01g02640	Glyma01g02640	Gm01:2168404-2173706	byo-15-0	byo-15-7	OK	4.98143	7.26876	0.545149	-1.10032	0.271191	0.70458	no
Glyma01g02660	Glyma01g02660	Glyma01g02660	Gm01:2184322-2188837	byo-15-0	byo-15-7	OK	5.89535	9.16987	0.637325	-1.20012	0.230092	0.660788	no
Glyma01g02670	Glyma01g02670	Glyma01g02670	Gm01:2192165-2194689	byo-15-0	byo-15-7	OK	12.1422	10.5515	-0.202587	0.428541	0.668257	0.929315	no
Glyma01g02691	Glyma01g02691	Glyma01g02691	Gm01:2199760-2201127	byo-15-0	byo-15-7	OK	1.26783	1.27926	0.012954	-0.0167046	0.986672	0.997259	no
Glyma01g02710	Glyma01g02710	Glyma01g02710	Gm01:2204078-2206129	byo-15-0	byo-15-7	NOTEST	0	0	0	0	1	1	no
Glyma01g02720	Glyma01g02720	Glyma01g02720	Gm01:2204078-2206129	byo-15-0	byo-15-7	OK	42.2561	29.7001	-0.50869	1.0731	0.283224	0.715933	no
Glyma01g02740	Glyma01g02740	Glyma01g02740	Gm01:2209772-2211864	byo-15-0	byo-15-7	OK	0.312697	0.746015	1.25444	-1.5713	0.116113	0.48222	no
Glyma01g02750	Glyma01g02750	Glyma01g02750	Gm01:2228817-2234268	byo-15-0	byo-15-7	OK	0.540463	1.68287	1.63866	-2.35651	0.0184476	0.16512	no
Glyma01g02760	Glyma01g02760	Glyma01g02760	Gm01:2239126-2244480	byo-15-0	byo-15-7	NOTEST	0.0832375	0.044714	-0.896506	0.722589	0.469932	1	no
Glyma01g02780	Glyma01g02780	Glyma01g02780	Gm01:2274285-2279870	byo-15-0	byo-15-7	OK	5.36603	5.17781	-0.0515128	0.108348	0.913719	0.984387	no
Glyma01g02790	Glyma01g02790	Glyma01g02790	Gm01:2280412-2286189	byo-15-0	byo-15-7	NOTEST	0.147029	0.0996473	-0.561197	0.533371	0.593777	1	no
Glyma01g02800	Glyma01g02800	Glyma01g02800	Gm01:2289835-2296934	byo-15-0	byo-15-7	OK	1.0842	3.02352	1.47959	-2.6	0.00932248	0.107644	no
Glyma01g02810	Glyma01g02810	Glyma01g02810	Gm01:2296971-2301386	byo-15-0	byo-15-7	NOTEST	0.0861831	0.117914	0.452252	-0.478155	0.63254	1	no
Glyma01g02820	Glyma01g02820	Glyma01g02820	Gm01:2307249-2310533	byo-15-0	byo-15-7	OK	8.3477	7.68159	-0.119975	0.240992	0.809561	0.963731	no
Glyma01g02830	Glyma01g02830	Glyma01g02830	Gm01:2320650-2323809	byo-15-0	byo-15-7	NOTEST	0	0	0	0	1	1	no
Glyma01g02840	Glyma01g02840	Glyma01g02840	Gm01:2324547-2332128	byo-15-0	byo-15-7	OK	19.9517	9.07734	-1.13617	2.32281	0.0201895	0.174814	no
Glyma01g02850	Glyma01g02850	Glyma01g02850	Gm01:2336135-2340956	byo-15-0	byo-15-7	OK	47.0083	16.529	-1.50792	2.68016	0.00735866	0.0924761	no
Glyma01g02880	Glyma01g02880	Glyma01g02880	Gm01:2360197-2366406	byo-15-0	byo-15-7	OK	13.6057	7.30895	-0.896476	1.74777	0.080504	0.395615	no
Glyma01g02890	Glyma01g02890	Glyma01g02890	Gm01:2373884-2395585	byo-15-0	byo-15-7	OK	1.31665	1.31811	0.00160133	-0.00294067	0.997654	0.999214	no
Glyma01g02900	Glyma01g02900	Glyma01g02900	Gm01:2398001-2407368	byo-15-0	byo-15-7	OK	1.47213	1.51713	0.0434388	-0.0589213	0.953015	0.991449	no
Glyma01g02920	Glyma01g02920	Glyma01g02920	Gm01:2419558-2420449	byo-15-0	byo-15-7	OK	1.23467	1.42217	0.203966	-0.275434	0.782982	0.957278	no
Glyma01g02930	Glyma01g02930	Glyma01g02930	Gm01:2424756-2426304	byo-15-0	byo-15-7	NOTEST	0.15146	0.309727	1.03206	-0.900516	0.367846	1	no
Glyma01g02941	Glyma01g02941	Glyma01g02941	Gm01:2426753-2435682	byo-15-0	byo-15-7	OK	2.7664	2.24258	-0.302848	0.593572	0.552799	0.884258	no
Glyma01g02950	Glyma01g02950	Glyma01g02950	Gm01:2448362-2450139	byo-15-0	byo-15-7	OK	48.675	22.4404	-1.11709	2.20414	0.0275145	0.211701	no
Glyma01g02963	Glyma01g02963	Glyma01g02963	Gm01:2455817-2458234	byo-15-0	byo-15-7	NOTEST	0.0168439	0.00873495	-0.947356	0.274461	0.78373	1	no
Glyma01g02976	Glyma01g02976	Glyma01g02976	Gm01:2465269-2466518	byo-15-0	byo-15-7	NOTEST	0	0	0	0	1	1	no
Glyma01g02990	Glyma01g02990	Glyma01g02990	Gm01:2477179-2479230	byo-15-0	byo-15-7	OK	2.26942	2.89667	0.352076	-0.54688	0.584461	0.898041	no
Glyma01g03005	Glyma01g03005	Glyma01g03005	Gm01:2495435-2497366	byo-15-0	byo-15-7	NOTEST	0.268318	0.25165	-0.09253	0.0979533	0.921969	1	no
Glyma01g03020	Glyma01g03020	Glyma01g03020	Gm01:2497579-2500150	byo-15-0	byo-15-7	OK	11.0782	13.0312	0.234243	-0.478905	0.632006	0.918118	no
Glyma01g03030	Glyma01g03030	Glyma01g03030	Gm01:2522226-2524933	byo-15-0	byo-15-7	OK	2.15529	2.52581	0.228867	-0.382251	0.702275	0.939587	no
Glyma01g03040	Glyma01g03040	Glyma01g03040	Gm01:2530562-2537849	byo-15-0	byo-15-7	NOTEST	0.211265	0.0240254	-3.13642	1.73004	0.0836225	1	no
Glyma01g03050	Glyma01g03050	Glyma01g03050	Gm01:2543533-2544636	byo-15-0	byo-15-7	NOTEST	0	0	0	0	1	1	no
Glyma01g03060	Glyma01g03060	Glyma01g03060	Gm01:2551019-2553294	byo-15-0	byo-15-7	NOTEST	0.166809	0.0373602	-2.15862	1.57392	0.115506	1	no
Glyma01g03070	Glyma01g03070	Glyma01g03070	Gm01:2585415-2586673	byo-15-0	byo-15-7	OK	267.205	181.766	-0.555866	0.950367	0.341926	0.765518	no
Glyma01g03090	Glyma01g03090	Glyma01g03090	Gm01:2600263-2605224	byo-15-0	byo-15-7	OK	11.8986	8.26521	-0.525668	1.10503	0.269145	0.703028	no
Glyma01g03100	Glyma01g03100	Glyma01g03100	Gm01:2633476-2636259	byo-15-0	byo-15-7	OK	2.52008	3.04759	0.274199	-0.481817	0.629936	0.917628	no
Glyma01g03110	Glyma01g03110	Glyma01g03110	Gm01:2667742-2669323	byo-15-0	byo-15-7	NOTEST	0	0	0	0	1	1	no
Glyma01g03120	Glyma01g03120	Glyma01g03120	Gm01:2683531-2686001	byo-15-0	byo-15-7	OK	2.90957	2.07009	-0.491113	0.771629	0.440334	0.830399	no
Glyma01g03130	Glyma01g03130	Glyma01g03130	Gm01:2686762-2690092	byo-15-0	byo-15-7	OK	3.03403	4.54227	0.58218	-1.12434	0.26087	0.696017	no
Glyma01g03140	Glyma01g03140	Glyma01g03140	Gm01:2696508-2700015	byo-15-0	byo-15-7	LOWDATA	0	0	0.970436	0	1	1	no
Glyma01g03150	Glyma01g03150	Glyma01g03150	Gm01:2696508-2700015	byo-15-0	byo-15-7	OK	23.7548	46.5459	0.970436	-1.78335	0.0745301	0.378186	no
Glyma01g03160	Glyma01g03160	Glyma01g03160	Gm01:2716401-2724818	byo-15-0	byo-15-7	OK	34.1526	21.8031	-0.64746	1.2148	0.224442	0.654324	no
Glyma01g03180	Glyma01g03180	Glyma01g03180	Gm01:2725857-2728953	byo-15-0	byo-15-7	OK	37.7006	54.3376	0.527364	-1.04311	0.296899	0.728754	no
Glyma01g03190	Glyma01g03190	Glyma01g03190	Gm01:2731349-2739464	byo-15-0	byo-15-7	OK	1.68403	2.65958	0.65928	-1.15528	0.247976	0.682805	no
Glyma01g03200	Glyma01g03200	Glyma01g03200	Gm01:2741979-2744444	byo-15-0	byo-15-7	NOTEST	0	0	0	0	1	1	no
Glyma01g03210	Glyma01g03210	Glyma01g03210	Gm01:2749285-2751625	byo-15-0	byo-15-7	OK	0.623991	0.698972	0.163711	-0.229595	0.818406	0.965233	no
Glyma01g03220	Glyma01g03220	Glyma01g03220	Gm01:2752604-2755538	byo-15-0	byo-15-7	OK	4.39938	6.81391	0.631182	-1.26285	0.206643	0.630594	no
Glyma01g03240	Glyma01g03240	Glyma01g03240	Gm01:2765558-2766634	byo-15-0	byo-15-7	NOTEST	0	0	0	0	1	1	no
Glyma01g03260	Glyma01g03260	Glyma01g03260	Gm01:2784884-2792465	byo-15-0	byo-15-7	OK	766.913	728.753	-0.0736329	0.0728024	0.941963	0.989728	no
Glyma01g03270	Glyma01g03270	Glyma01g03270	Gm01:2803081-2807357	byo-15-0	byo-15-7	OK	5.72557	4.32418	-0.404992	0.790052	0.429498	0.823065	no
Glyma01g03281	Glyma01g03281	Glyma01g03281	Gm01:2811064-2811250	byo-15-0	byo-15-7	NOTEST	0	0	0	0	1	1	no
Glyma01g03290	Glyma01g03290	Glyma01g03290	Gm01:2814292-2814876	byo-15-0	byo-15-7	NOTEST	0	0	0	0	1	1	no
Glyma01g03301	Glyma01g03301	Glyma01g03301	Gm01:2815679-2817384	byo-15-0	byo-15-7	NOTEST	0	0.123766	1.79769e+308	1.79769e+308	0.0680698	1	no
Glyma01g03310	Glyma01g03310	Glyma01g03310	Gm01:2820282-2822588	byo-15-0	byo-15-7	NOTEST	0	0	0	0	1	1	no
Glyma01g03321	Glyma01g03321	Glyma01g03321	Gm01:2825602-2830330	byo-15-0	byo-15-7	NOTEST	0	0	0	0	1	1	no
Glyma01g03330	Glyma01g03330	Glyma01g03330	Gm01:2836050-2840937	byo-15-0	byo-15-7	OK	4.63655	4.51444	-0.0385047	0.0747457	0.940417	0.989474	no
Glyma01g03340	Glyma01g03340	Glyma01g03340	Gm01:2843206-2846996	byo-15-0	byo-15-7	NOTEST	0	0	0	0	1	1	no
Glyma01g03360	Glyma01g03360	Glyma01g03360	Gm01:2857640-2860816	byo-15-0	byo-15-7	OK	15.5929	10.8092	-0.528631	1.05241	0.292613	0.725343	no
Glyma01g03371	Glyma01g03371	Glyma01g03371	Gm01:2868081-2871591	byo-15-0	byo-15-7	NOTEST	0.184035	0.0445996	-2.04488	0.774411	0.438688	1	no
Glyma01g03380	Glyma01g03380	Glyma01g03380	Gm01:2872827-2875983	byo-15-0	byo-15-7	OK	4.67294	8.61667	0.882801	-1.63847	0.101325	0.45099	no
Glyma01g03390	Glyma01g03390	Glyma01g03390	Gm01:2879282-2884236	byo-15-0	byo-15-7	OK	1.48826	0.309169	-2.26716	3.01376	0.00258031	0.0454176	yes
Glyma01g03400	Glyma01g03400	Glyma01g03400	Gm01:2895941-2899203	byo-15-0	byo-15-7	NOTEST	0.0479599	0	-1.79769e+308	-1.79769e+308	0.124059	1	no
Glyma01g03410	Glyma01g03410	Glyma01g03410	Gm01:2907608-2911173	byo-15-0	byo-15-7	NOTEST	0	0	0	0	1	1	no
Glyma01g03420	Glyma01g03420	Glyma01g03420	Gm01:2912689-2918182	byo-15-0	byo-15-7	OK	2.33346	1.27417	-0.872908	1.39185	0.163968	0.571554	no
Glyma01g03430	Glyma01g03430	Glyma01g03430	Gm01:2918596-2922169	byo-15-0	byo-15-7	OK	10.6569	3.19204	-1.73924	2.99985	0.00270114	0.046881	yes
Glyma01g03450	Glyma01g03450	Glyma01g03450	Gm01:2932298-2941083	byo-15-0	byo-15-7	NOTEST	0.243262	0	-1.79769e+308	-1.79769e+308	0.0181958	1	no
Glyma01g03470	Glyma01g03470	Glyma01g03470	Gm01:2983533-2985063	byo-15-0	byo-15-7	OK	1.13084	0.858431	-0.397614	0.459632	0.645781	0.922043	no
Glyma01g03480	Glyma01g03480	Glyma01g03480	Gm01:2985878-2990726	byo-15-0	byo-15-7	OK	2.0041	0.44955	-2.1564	3.03916	0.00237242	0.0431501	yes
Glyma01g03490	Glyma01g03490	Glyma01g03490	Gm01:2997710-3004125	byo-15-0	byo-15-7	OK	5.25954	4.91875	-0.0966456	0.201063	0.84065	0.970096	no
Glyma01g03500	Glyma01g03500	Glyma01g03500	Gm01:3020777-3022182	byo-15-0	byo-15-7	OK	2.66871	6.31851	1.24344	-2.30239	0.0213132	0.180622	no
Glyma01g03530	Glyma01g03530	Glyma01g03530	Gm01:3043747-3048064	byo-15-0	byo-15-7	OK	14.6213	13.0479	-0.164257	0.34734	0.728336	0.946263	no
Glyma01g03540	Glyma01g03540	Glyma01g03540	Gm01:3063216-3065991	byo-15-0	byo-15-7	OK	10.363	10.4047	0.00580168	-0.0119681	0.990451	0.998024	no
Glyma01g03550	Glyma01g03550	Glyma01g03550	Gm01:3067764-3073752	byo-15-0	byo-15-7	OK	26.7912	15.2981	-0.80841	1.70246	0.0886694	0.418912	no
Glyma01g03570	Glyma01g03570	Glyma01g03570	Gm01:3082363-3083185	byo-15-0	byo-15-7	OK	195.041	244.139	0.323927	-0.564324	0.572534	0.893476	no
Glyma01g03580	Glyma01g03580	Glyma01g03580	Gm01:3090805-3093412	byo-15-0	byo-15-7	OK	0.786989	0	-1.79769e+308	-1.79769e+308	0.00621328	0.0823633	no
Glyma01g03590	Glyma01g03590	Glyma01g03590	Gm01:3106546-3108525	byo-15-0	byo-15-7	OK	12.1324	23.0987	0.928943	-1.80232	0.0714945	0.369634	no
Glyma01g03600	Glyma01g03600	Glyma01g03600	Gm01:3114320-3119083	byo-15-0	byo-15-7	OK	10.8621	4.37096	-1.31328	2.27384	0.0229756	0.189395	no
Glyma01g03610	Glyma01g03610	Glyma01g03610	Gm01:3120584-3124029	byo-15-0	byo-15-7	OK	16.8214	22.5864	0.425158	-0.896918	0.369763	0.788437	no
Glyma01g03621	Glyma01g03621	Glyma01g03621	Gm01:3124253-3126137	byo-15-0	byo-15-7	OK	0.770363	0.519704	-0.567849	0.645169	0.518818	0.869737	no
Glyma01g03630	Glyma01g03630	Glyma01g03630	Gm01:3127061-3127831	byo-15-0	byo-15-7	NOTEST	0	0.0969275	1.79769e+308	1.79769e+308	0.194774	1	no
Glyma01g03650	Glyma01g03650	Glyma01g03650	Gm01:3132200-3135385	byo-15-0	byo-15-7	OK	45.326	31.6983	-0.515933	0.98819	0.32306	0.749836	no
Glyma01g03661	Glyma01g03661	Glyma01g03661	Gm01:3135687-3141621	byo-15-0	byo-15-7	NOTEST	0	0.0387391	1.79769e+308	1.79769e+308	0.28571	1	no
Glyma01g03670	Glyma01g03670	Glyma01g03670	Gm01:3144701-3145778	byo-15-0	byo-15-7	NOTEST	0.396762	0.128583	-1.62557	1.36779	0.171378	1	no
Glyma01g03690	Glyma01g03690	Glyma01g03690	Gm01:3152038-3157769	byo-15-0	byo-15-7	NOTEST	0	0	0	0	1	1	no
Glyma01g03700	Glyma01g03700	Glyma01g03700	Gm01:3162858-3164334	byo-15-0	byo-15-7	OK	2.43287	1.11223	-1.12921	1.70652	0.0879105	0.417243	no
Glyma01g03710	Glyma01g03710	Glyma01g03710	Gm01:3167711-3172458	byo-15-0	byo-15-7	OK	3.7628	5.06812	0.429642	-0.739438	0.459641	0.838267	no
Glyma01g03720	Glyma01g03720	Glyma01g03720	Gm01:3174000-3185126	byo-15-0	byo-15-7	OK	131.1	55.9788	-1.22771	2.14793	0.0317195	0.230608	no
Glyma01g03730	Glyma01g03730	Glyma01g03730	Gm01:3187344-3190927	byo-15-0	byo-15-7	OK	14.7001	14.7084	0.0008099	-0.00167096	0.998667	0.999553	no
Glyma01g03750	Glyma01g03750	Glyma01g03750	Gm01:3193903-3200492	byo-15-0	byo-15-7	OK	20.7723	17.8092	-0.222037	0.468591	0.639362	0.920038	no
Glyma01g03760	Glyma01g03760	Glyma01g03760	Gm01:3219159-3222449	byo-15-0	byo-15-7	OK	4.47074	3.64433	-0.294859	0.609723	0.542046	0.87955	no
Glyma01g03780	Glyma01g03780	Glyma01g03780	Gm01:3233213-3235819	byo-15-0	byo-15-7	OK	0	1.21837	1.79769e+308	1.79769e+308	0.0680698	0.359319	no
Glyma01g03790	Glyma01g03790	Glyma01g03790	Gm01:3242605-3245458	byo-15-0	byo-15-7	NOTEST	0.130749	0.0430646	-1.60223	1.34815	0.17761	1	no
Glyma01g03810	Glyma01g03810	Glyma01g03810	Gm01:3249405-3255967	byo-15-0	byo-15-7	OK	13.2498	15.6088	0.236394	-0.437415	0.66181	0.92645	no
Glyma01g03820	Glyma01g03820	Glyma01g03820	Gm01:3263267-3267637	byo-15-0	byo-15-7	OK	5.90327	5.74582	-0.0390006	0.0796569	0.93651	0.988943	no
Glyma01g03830	Glyma01g03830	Glyma01g03830	Gm01:3283632-3286899	byo-15-0	byo-15-7	OK	8.34965	12.6866	0.603521	-1.23931	0.215231	0.642172	no
Glyma01g03850	Glyma01g03850	Glyma01g03850	Gm01:3312867-3318968	byo-15-0	byo-15-7	OK	1.1051	2.76828	1.32481	-2.20141	0.0277073	0.212673	no
Glyma01g03870	Glyma01g03870	Glyma01g03870	Gm01:3327064-3332585	byo-15-0	byo-15-7	OK	3.37215	4.64113	0.460806	-0.936228	0.349156	0.770469	no
Glyma01g03880	Glyma01g03880	Glyma01g03880	Gm01:3348917-3352335	byo-15-0	byo-15-7	OK	0.892232	0.933481	0.0652018	-0.0943329	0.924845	0.986318	no
Glyma01g03890	Glyma01g03890	Glyma01g03890	Gm01:3359534-3372620	byo-15-0	byo-15-7	OK	5.46985	5.22594	-0.0658101	0.138158	0.890116	0.981468	no
Glyma01g03900	Glyma01g03900	Glyma01g03900	Gm01:3378305-3380122	byo-15-0	byo-15-7	NOTEST	0.0952495	0.132948	0.481074	-0.405828	0.684869	1	no
Glyma01g03910	Glyma01g03910	Glyma01g03910	Gm01:3381988-3384388	byo-15-0	byo-15-7	OK	0.946402	1.24132	0.391345	-0.524349	0.600036	0.904532	no
Glyma01g03921	Glyma01g03921	Glyma01g03921	Gm01:3390102-3396781	byo-15-0	byo-15-7	NOTEST	0.0952832	0.0940414	-0.0189249	0.0158445	0.987358	1	no
Glyma01g03930	Glyma01g03930	Glyma01g03930	Gm01:3400476-3411080	byo-15-0	byo-15-7	OK	17.7867	31.6137	0.829753	-1.65266	0.0983995	0.443236	no
Glyma01g03940	Glyma01g03940	Glyma01g03940	Gm01:3413504-3415979	byo-15-0	byo-15-7	OK	0.0865238	0.593269	2.77752	-2.64844	0.00808633	0.0983964	no
Glyma01g03948	Glyma01g03948	Glyma01g03948	Gm01:3423773-3425166	byo-15-0	byo-15-7	OK	0.660625	1.08425	0.714793	-0.785628	0.432085	0.824887	no
Glyma01g03956	Glyma01g03956	Glyma01g03956	Gm01:3431068-3433014	byo-15-0	byo-15-7	OK	8.43238	4.74064	-0.830856	1.48204	0.13833	0.526731	no
Glyma01g03964	Glyma01g03964	Glyma01g03964	Gm01:3433091-3436594	byo-15-0	byo-15-7	OK	1.20587	1.2265	0.0244671	-0.0391794	0.968747	0.994258	no
Glyma01g03972	Glyma01g03972	Glyma01g03972	Gm01:3439667-3441084	byo-15-0	byo-15-7	NOTEST	0	0	0	0	1	1	no
Glyma01g03980	Glyma01g03980	Glyma01g03980	Gm01:3455191-3461955	byo-15-0	byo-15-7	OK	0.806981	0.818436	0.0203363	-0.0340886	0.972806	0.995119	no
Glyma01g04000	Glyma01g04000	Glyma01g04000	Gm01:3487914-3494204	byo-15-0	byo-15-7	OK	0.428003	0.499319	0.222342	-0.319369	0.749447	0.95159	no
Glyma01g04015	Glyma01g04015	Glyma01g04015	Gm01:3502393-3507947	byo-15-0	byo-15-7	OK	0.254747	0.753438	1.56442	-1.68521	0.0919483	0.426768	no
Glyma01g04030	Glyma01g04030	Glyma01g04030	Gm01:3513144-3513438	byo-15-0	byo-15-7	NOTEST	0	0	0	0	1	1	no
Glyma01g04040	Glyma01g04040	Glyma01g04040	Gm01:3514698-3521382	byo-15-0	byo-15-7	OK	2.36117	1.42212	-0.731458	1.02062	0.307434	0.737519	no
Glyma01g04050	Glyma01g04050	Glyma01g04050	Gm01:3524004-3527778	byo-15-0	byo-15-7	OK	79.1126	64.0926	-0.30375	0.601312	0.547632	0.881917	no
Glyma01g04060	Glyma01g04060	Glyma01g04060	Gm01:3533389-3537718	byo-15-0	byo-15-7	OK	3.96466	5.39834	0.445317	-0.812975	0.416232	0.81566	no
Glyma01g04070	Glyma01g04070	Glyma01g04070	Gm01:3541049-3543307	byo-15-0	byo-15-7	OK	5.56596	4.45773	-0.320321	0.530499	0.595766	0.902841	no
Glyma01g04080	Glyma01g04080	Glyma01g04080	Gm01:3552334-3560811	byo-15-0	byo-15-7	OK	0.727827	0.72439	-0.00682982	0.0052931	0.995777	0.999024	no
Glyma01g04090	Glyma01g04090	Glyma01g04090	Gm01:3552334-3560811	byo-15-0	byo-15-7	OK	2.24895	5.01548	1.15714	-1.69864	0.0893877	0.420123	no
Glyma01g04100	Glyma01g04100	Glyma01g04100	Gm01:3565109-3567816	byo-15-0	byo-15-7	OK	4.15008	3.52614	-0.235049	0.449612	0.65299	0.924032	no
Glyma01g04107	Glyma01g04107	Glyma01g04107	Gm01:3570498-3572031	byo-15-0	byo-15-7	OK	1.03129	1.34247	0.380441	-0.484232	0.628222	0.916902	no
Glyma01g04114	Glyma01g04114	Glyma01g04114	Gm01:3573892-3576381	byo-15-0	byo-15-7	NOTEST	0	0	0	0	1	1	no
Glyma01g04122	Glyma01g04122	Glyma01g04122	Gm01:3576871-3579242	byo-15-0	byo-15-7	NOTEST	0.0916504	0.285633	1.63995	-1.48752	0.136878	1	no
Glyma01g04130	Glyma01g04130	Glyma01g04130	Gm01:3588235-3590927	byo-15-0	byo-15-7	OK	22.5569	8.91114	-1.33988	2.79553	0.00518151	0.072658	no
Glyma01g04140	Glyma01g04140	Glyma01g04140	Gm01:3593852-3595627	byo-15-0	byo-15-7	OK	6.83441	3.00735	-1.18432	2.04163	0.0411882	0.269976	no
Glyma01g04151	Glyma01g04151	Glyma01g04151	Gm01:3601850-3604249	byo-15-0	byo-15-7	OK	3.24443	0.205005	-3.98423	4.90942	9.13484e-07	9.93879e-05	yes
Glyma01g04160	Glyma01g04160	Glyma01g04160	Gm01:3614505-3619208	byo-15-0	byo-15-7	NOTEST	0	0	0	0	1	1	no
Glyma01g04170	Glyma01g04170	Glyma01g04170	Gm01:3622380-3627999	byo-15-0	byo-15-7	OK	29.1341	13.6247	-1.09648	1.94519	0.0517517	0.307188	no
Glyma01g04190	Glyma01g04190	Glyma01g04190	Gm01:3657972-3659933	byo-15-0	byo-15-7	OK	2.27881	2.17947	-0.0643026	0.0989229	0.921199	0.985727	no
Glyma01g04200	Glyma01g04200	Glyma01g04200	Gm01:3671722-3676091	byo-15-0	byo-15-7	NOTEST	0.0655318	0.0497714	-0.396877	0.347414	0.728281	1	no
Glyma01g04210	Glyma01g04210	Glyma01g04210	Gm01:3695969-3699966	byo-15-0	byo-15-7	LOWDATA	0	0	-5.34222	0	1	1	no
Glyma01g04220	Glyma01g04220	Glyma01g04220	Gm01:3695969-3699966	byo-15-0	byo-15-7	OK	0.747662	0.0184304	-5.34222	2.65028	0.00804257	0.0981326	no
Glyma01g04230	Glyma01g04230	Glyma01g04230	Gm01:3717479-3721262	byo-15-0	byo-15-7	OK	15.1885	20.9482	0.463844	-0.976478	0.328828	0.755106	no
Glyma01g04241	Glyma01g04241	Glyma01g04241	Gm01:3734519-3735893	byo-15-0	byo-15-7	NOTEST	0.352873	0.0679046	-2.37757	1.75076	0.0799867	1	no
Glyma01g04250	Glyma01g04250	Glyma01g04250	Gm01:3750043-3752379	byo-15-0	byo-15-7	OK	2.22969	0.772333	-1.52955	2.3262	0.0200081	0.173721	no
Glyma01g04261	Glyma01g04261	Glyma01g04261	Gm01:3767622-3769840	byo-15-0	byo-15-7	NOTEST	0	0.0294794	1.79769e+308	1.79769e+308	0.194774	1	no
Glyma01g04270	Glyma01g04270	Glyma01g04270	Gm01:3770398-3790851	byo-15-0	byo-15-7	OK	10.2477	9.18717	-0.157604	0.290964	0.771079	0.955503	no
Glyma01g04285	Glyma01g04285	Glyma01g04285	Gm01:3792928-3793735	byo-15-0	byo-15-7	NOTEST	0	0.0852404	1.79769e+308	1.79769e+308	0.194774	1	no
Glyma01g04300	Glyma01g04300	Glyma01g04300	Gm01:3800482-3805133	byo-15-0	byo-15-7	OK	3.00839	3.30891	0.137363	-0.225155	0.821859	0.965938	no
Glyma01g04310	Glyma01g04310	Glyma01g04310	Gm01:3839061-3840278	byo-15-0	byo-15-7	NOTEST	0	0	0	0	1	1	no
Glyma01g04320	Glyma01g04320	Glyma01g04320	Gm01:3843990-3851452	byo-15-0	byo-15-7	OK	11.5606	9.08461	-0.347716	0.706724	0.479738	0.849357	no
Glyma01g04330	Glyma01g04330	Glyma01g04330	Gm01:3875178-3876239	byo-15-0	byo-15-7	NOTEST	0.163917	0.26951	0.717375	-0.377807	0.705574	1	no
Glyma01g04335	Glyma01g04335	Glyma01g04335	Gm01:3875178-3876239	byo-15-0	byo-15-7	OK	2.84639	2.9103	0.0320357	-0.0155611	0.987585	0.99751	no
Glyma01g04340	Glyma01g04340	Glyma01g04340	Gm01:3894968-3896837	byo-15-0	byo-15-7	OK	3.91486	2.58868	-0.596745	1.07804	0.281017	0.714184	no
Glyma01g04350	Glyma01g04350	Glyma01g04350	Gm01:3901049-3902869	byo-15-0	byo-15-7	OK	112.912	22.7442	-2.31162	4.44653	8.72695e-06	0.000615795	yes
Glyma01g04361	Glyma01g04361	Glyma01g04361	Gm01:3905975-3906745	byo-15-0	byo-15-7	NOTEST	0	0	0	0	1	1	no
Glyma01g04370	Glyma01g04370	Glyma01g04370	Gm01:3910797-3912019	byo-15-0	byo-15-7	OK	1.46107	1.0418	-0.487953	0.659357	0.509667	0.865171	no
Glyma01g04380	Glyma01g04380	Glyma01g04380	Gm01:3925166-3926952	byo-15-0	byo-15-7	OK	1.94243	4.35128	1.16358	-2.0366	0.0416905	0.272178	no
Glyma01g04400	Glyma01g04400	Glyma01g04400	Gm01:3936729-3941417	byo-15-0	byo-15-7	OK	13.9215	13.1426	-0.0830674	0.175534	0.86066	0.974488	no
Glyma01g04410	Glyma01g04410	Glyma01g04410	Gm01:3950636-3955032	byo-15-0	byo-15-7	OK	2.52819	1.9116	-0.403321	0.628844	0.529451	0.874973	no
Glyma01g04421	Glyma01g04421	Glyma01g04421	Gm01:3965515-3967099	byo-15-0	byo-15-7	OK	0.863057	1.24878	0.532997	-0.675113	0.499604	0.859739	no
Glyma01g04430	Glyma01g04430	Glyma01g04430	Gm01:3981173-3984324	byo-15-0	byo-15-7	NOTEST	0.186782	0.283596	0.602478	-0.710933	0.477126	1	no
Glyma01g04440	Glyma01g04440	Glyma01g04440	Gm01:3984541-3989981	byo-15-0	byo-15-7	OK	3.3122	3.22418	-0.0388567	0.0737414	0.941216	0.989592	no
Glyma01g04450	Glyma01g04450	Glyma01g04450	Gm01:3990476-3991986	byo-15-0	byo-15-7	NOTEST	0.383889	0.281802	-0.446009	0.459999	0.645517	1	no
Glyma01g04460	Glyma01g04460	Glyma01g04460	Gm01:3993484-3995564	byo-15-0	byo-15-7	OK	6.89583	7.68115	0.155599	-0.326106	0.744344	0.95047	no
Glyma01g04468	Glyma01g04468	Glyma01g04468	Gm01:4005281-4011408	byo-15-0	byo-15-7	NOTEST	0.463936	0.438668	-0.080795	0.098092	0.921859	1	no
Glyma01g04476	Glyma01g04476	Glyma01g04476	Gm01:4012612-4020206	byo-15-0	byo-15-7	OK	7.5137	9.20937	0.29358	-0.617073	0.537187	0.878006	no
Glyma01g04484	Glyma01g04484	Glyma01g04484	Gm01:4023641-4024312	byo-15-0	byo-15-7	OK	6.40097	5.62025	-0.187658	0.256786	0.797344	0.961304	no
Glyma01g04492	Glyma01g04492	Glyma01g04492	Gm01:4024327-4035566	byo-15-0	byo-15-7	OK	5.80323	6.22287	0.100725	-0.213136	0.831221	0.967353	no
Glyma01g04500	Glyma01g04500	Glyma01g04500	Gm01:4070066-4074636	byo-15-0	byo-15-7	NOTEST	0.302955	0.172599	-0.811683	0.959641	0.337236	1	no
Glyma01g04515	Glyma01g04515	Glyma01g04515	Gm01:4094045-4096371	byo-15-0	byo-15-7	OK	3.3021	2.07611	-0.669503	1.25666	0.208876	0.633699	no
Glyma01g04530	Glyma01g04530	Glyma01g04530	Gm01:4108620-4111438	byo-15-0	byo-15-7	OK	65.6257	27.811	-1.2386	2.38744	0.0169661	0.157001	no
Glyma01g04545	Glyma01g04545	Glyma01g04545	Gm01:4119639-4119995	byo-15-0	byo-15-7	NOTEST	0	0	0	0	1	1	no
Glyma01g04560	Glyma01g04560	Glyma01g04560	Gm01:4134768-4138744	byo-15-0	byo-15-7	OK	2.76802	3.55025	0.359067	-0.556355	0.577968	0.894922	no
Glyma01g04570	Glyma01g04570	Glyma01g04570	Gm01:4140494-4144862	byo-15-0	byo-15-7	OK	9.7173	8.05957	-0.269851	0.539902	0.589264	0.899853	no
Glyma01g04580	Glyma01g04580	Glyma01g04580	Gm01:4160568-4163236	byo-15-0	byo-15-7	OK	1.03388	1.3236	0.356404	-0.486026	0.626949	0.916625	no
Glyma01g04590	Glyma01g04590	Glyma01g04590	Gm01:4190455-4199176	byo-15-0	byo-15-7	OK	0.711265	0.6798	-0.0652766	0.10564	0.915868	0.984945	no
Glyma01g04600	Glyma01g04600	Glyma01g04600	Gm01:4213202-4215294	byo-15-0	byo-15-7	OK	8.65775	7.80695	-0.149233	0.278325	0.780763	0.956927	no
Glyma01g04610	Glyma01g04610	Glyma01g04610	Gm01:4217440-4221353	byo-15-0	byo-15-7	OK	1.62299	1.06238	-0.611351	0.8916	0.372607	0.78991	no
Glyma01g04616	Glyma01g04616	Glyma01g04616	Gm01:4234777-4236309	byo-15-0	byo-15-7	NOTEST	0	0	0	0	1	1	no
Glyma01g04623	Glyma01g04623	Glyma01g04623	Gm01:4248628-4253094	byo-15-0	byo-15-7	NOTEST	0	0	0	0	1	1	no
Glyma01g04630	Glyma01g04630	Glyma01g04630	Gm01:4267486-4273671	byo-15-0	byo-15-7	OK	0.941687	1.12113	0.251633	-0.389326	0.697035	0.938631	no
Glyma01g04640	Glyma01g04640	Glyma01g04640	Gm01:4278592-4280521	byo-15-0	byo-15-7	NOTEST	0	0.0442296	1.79769e+308	1.79769e+308	0.111832	1	no
Glyma01g04650	Glyma01g04650	Glyma01g04650	Gm01:4282743-4288290	byo-15-0	byo-15-7	NOTEST	0	0	0	0	1	1	no
Glyma01g04660	Glyma01g04660	Glyma01g04660	Gm01:4294494-4299400	byo-15-0	byo-15-7	OK	1.10636	1.08043	-0.0342128	0.0498323	0.960256	0.99249	no
Glyma01g04670	Glyma01g04670	Glyma01g04670	Gm01:4302121-4303918	byo-15-0	byo-15-7	OK	0.693928	0.20822	-1.73668	1.81452	0.0695973	0.363722	no
Glyma01g04690	Glyma01g04690	Glyma01g04690	Gm01:4314360-4316230	byo-15-0	byo-15-7	OK	7.42412	5.51982	-0.4276	0.796561	0.425706	0.820951	no
Glyma01g04700	Glyma01g04700	Glyma01g04700	Gm01:4319542-4321677	byo-15-0	byo-15-7	NOTEST	0	0	0	0	1	1	no
Glyma01g04710	Glyma01g04710	Glyma01g04710	Gm01:4323773-4325439	byo-15-0	byo-15-7	OK	348.824	138.583	-1.33175	2.30372	0.0212383	0.180184	no
Glyma01g04720	Glyma01g04720	Glyma01g04720	Gm01:4331150-4337114	byo-15-0	byo-15-7	OK	2.91615	5.74774	0.978927	-1.8752	0.0607658	0.338907	no
Glyma01g04730	Glyma01g04730	Glyma01g04730	Gm01:4347876-4356892	byo-15-0	byo-15-7	OK	2.26079	3.59995	0.671148	-1.28748	0.197927	0.61863	no
Glyma01g04740	Glyma01g04740	Glyma01g04740	Gm01:4358996-4361499	byo-15-0	byo-15-7	OK	3.81882	1.98113	-0.946802	1.57696	0.114805	0.479284	no
Glyma01g04750	Glyma01g04750	Glyma01g04750	Gm01:4367348-4370072	byo-15-0	byo-15-7	OK	0.259573	0.50783	0.968207	-1.05716	0.290441	0.723128	no
Glyma01g04760	Glyma01g04760	Glyma01g04760	Gm01:4370091-4371490	byo-15-0	byo-15-7	OK	40.752	20.5965	-0.984468	2.06666	0.0387663	0.259755	no
Glyma01g04770	Glyma01g04770	Glyma01g04770	Gm01:4372756-4380517	byo-15-0	byo-15-7	NOTEST	0	0	0	0	1	1	no
Glyma01g04780	Glyma01g04780	Glyma01g04780	Gm01:4372756-4380517	byo-15-0	byo-15-7	NOTEST	0.00302024	0.0760214	4.65367	-0.0821921	0.934494	1	no
Glyma01g04791	Glyma01g04791	Glyma01g04791	Gm01:4372756-4380517	byo-15-0	byo-15-7	NOTEST	0.269521	0.252633	-0.0933523	0.119544	0.904845	1	no
Glyma01g04800	Glyma01g04800	Glyma01g04800	Gm01:4381634-4382677	byo-15-0	byo-15-7	NOTEST	0	0	0	0	1	1	no
Glyma01g04810	Glyma01g04810	Glyma01g04810	Gm01:4398540-4400009	byo-15-0	byo-15-7	NOTEST	0	0	0	0	1	1	no
Glyma01g04820	Glyma01g04820	Glyma01g04820	Gm01:4406613-4412858	byo-15-0	byo-15-7	OK	12.5172	13.3705	0.0951474	-0.198827	0.842398	0.970418	no
Glyma01g04830	Glyma01g04830	Glyma01g04830	Gm01:4435158-4439690	byo-15-0	byo-15-7	OK	18.0765	15.7377	-0.199889	0.420473	0.67414	0.931611	no
Glyma01g04860	Glyma01g04860	Glyma01g04860	Gm01:4462980-4471168	byo-15-0	byo-15-7	OK	3.52327	5.05571	0.520997	-0.900859	0.367664	0.787052	no
Glyma01g04870	Glyma01g04870	Glyma01g04870	Gm01:4462980-4471168	byo-15-0	byo-15-7	NOTEST	0.0856848	0.0260967	-1.71517	0.294116	0.768669	1	no
Glyma01g04880	Glyma01g04880	Glyma01g04880	Gm01:4472509-4474524	byo-15-0	byo-15-7	OK	6.11381	7.43547	0.28235	-0.53433	0.593113	0.901246	no
Glyma01g04890	Glyma01g04890	Glyma01g04890	Gm01:4508033-4510800	byo-15-0	byo-15-7	OK	7.08678	10.6634	0.589461	-1.1918	0.233341	0.66551	no
Glyma01g04895	Glyma01g04895	Glyma01g04895	Gm01:4537147-4539699	byo-15-0	byo-15-7	NOTEST	0	0	0	0	1	1	no
Glyma01g04900	Glyma01g04900	Glyma01g04900	Gm01:4581543-4588129	byo-15-0	byo-15-7	OK	4.12822	3.02833	-0.446994	0.747175	0.454958	0.835624	no
Glyma01g04920	Glyma01g04920	Glyma01g04920	Gm01:4591469-4596424	byo-15-0	byo-15-7	OK	33.5341	29.857	-0.167559	0.314399	0.753218	0.952757	no
Glyma01g04930	Glyma01g04930	Glyma01g04930	Gm01:4617117-4621351	byo-15-0	byo-15-7	OK	6.04479	7.29051	0.270327	-0.505209	0.613412	0.909542	no
Glyma01g04940	Glyma01g04940	Glyma01g04940	Gm01:4623827-4626604	byo-15-0	byo-15-7	NOTEST	0	0	0	0	1	1	no
Glyma01g04950	Glyma01g04950	Glyma01g04950	Gm01:4628266-4630966	byo-15-0	byo-15-7	NOTEST	0	0	0	0	1	1	no
Glyma01g04970	Glyma01g04970	Glyma01g04970	Gm01:4642856-4646062	byo-15-0	byo-15-7	NOTEST	0	0	0	0	1	1	no
Glyma01g04980	Glyma01g04980	Glyma01g04980	Gm01:4649145-4655506	byo-15-0	byo-15-7	OK	26.5495	24.7824	-0.0993691	0.202361	0.839634	0.969874	no
Glyma01g04991	Glyma01g04991	Glyma01g04991	Gm01:4658655-4660266	byo-15-0	byo-15-7	OK	1.64424	1.72491	0.0690992	-0.107088	0.91472	0.984586	no
Glyma01g05000	Glyma01g05000	Glyma01g05000	Gm01:4661267-4665903	byo-15-0	byo-15-7	OK	24.4916	8.90989	-1.45881	2.97888	0.002893	0.0492253	yes
Glyma01g05020	Glyma01g05020	Glyma01g05020	Gm01:4671907-4672948	byo-15-0	byo-15-7	NOTEST	0	0.0194573	1.79769e+308	1.79769e+308	0.271454	1	no
Glyma01g05035	Glyma01g05035	Glyma01g05035	Gm01:4674370-4675308	byo-15-0	byo-15-7	NOTEST	0	0	0	0	1	1	no
Glyma01g05050	Glyma01g05050	Glyma01g05050	Gm01:4685833-4692108	byo-15-0	byo-15-7	NOTEST	0	0	0	0	1	1	no
Glyma01g05060	Glyma01g05060	Glyma01g05060	Gm01:4706315-4710196	byo-15-0	byo-15-7	NOTEST	0	0	0	0	1	1	no
Glyma01g05070	Glyma01g05070	Glyma01g05070	Gm01:4710246-4716428	byo-15-0	byo-15-7	NOTEST	0	0	0	0	1	1	no
Glyma01g05080	Glyma01g05080	Glyma01g05080	Gm01:4729092-4732808	byo-15-0	byo-15-7	OK	3.96328	8.19306	1.04771	-1.85054	0.0642363	0.34934	no
Glyma01g05090	Glyma01g05090	Glyma01g05090	Gm01:4733168-4736974	byo-15-0	byo-15-7	NOTEST	0	0.0172914	1.79769e+308	1.79769e+308	0.298843	1	no
Glyma01g05100	Glyma01g05100	Glyma01g05100	Gm01:4750064-4755456	byo-15-0	byo-15-7	OK	1.38053	2.20923	0.67832	-1.15252	0.249109	0.684187	no
Glyma01g05110	Glyma01g05110	Glyma01g05110	Gm01:4767629-4768506	byo-15-0	byo-15-7	NOTEST	0	0	0	0	1	1	no
Glyma01g05120	Glyma01g05120	Glyma01g05120	Gm01:4767629-4768506	byo-15-0	byo-15-7	NOTEST	0	0	0	0	1	1	no
Glyma01g05135	Glyma01g05135	Glyma01g05135	Gm01:4772497-4774260	byo-15-0	byo-15-7	NOTEST	0	0	0	0	1	1	no
Glyma01g05150	Glyma01g05150	Glyma01g05150	Gm01:4805906-4807682	byo-15-0	byo-15-7	OK	130.045	105.684	-0.29926	0.556534	0.577846	0.894922	no
Glyma01g05160	Glyma01g05160	Glyma01g05160	Gm01:4822853-4826845	byo-15-0	byo-15-7	OK	7.78248	5.60923	-0.472428	0.970467	0.331814	0.757436	no
Glyma01g05170	Glyma01g05170	Glyma01g05170	Gm01:4850795-4854700	byo-15-0	byo-15-7	OK	8.11114	5.72318	-0.503088	0.987975	0.323165	0.749908	no
Glyma01g05180	Glyma01g05180	Glyma01g05180	Gm01:4855329-4863296	byo-15-0	byo-15-7	NOTEST	0.023758	0.0179469	-0.404679	0.0810627	0.935392	1	no
Glyma01g05190	Glyma01g05190	Glyma01g05190	Gm01:4855329-4863296	byo-15-0	byo-15-7	NOTEST	0.198176	0.0750529	-1.4008	1.27805	0.201231	1	no
Glyma01g05220	Glyma01g05220	Glyma01g05220	Gm01:4891977-4893336	byo-15-0	byo-15-7	OK	68.5781	41.2713	-0.732608	1.4646	0.143029	0.536657	no
Glyma01g05230	Glyma01g05230	Glyma01g05230	Gm01:4900381-4902743	byo-15-0	byo-15-7	OK	2.54481	2.09109	-0.283306	0.476852	0.633467	0.918727	no
Glyma01g05240	Glyma01g05240	Glyma01g05240	Gm01:4928138-4929616	byo-15-0	byo-15-7	NOTEST	0	0.177159	1.79769e+308	1.79769e+308	0.111832	1	no
Glyma01g05310	Glyma01g05310	Glyma01g05310	Gm01:4961751-4963489	byo-15-0	byo-15-7	NOTEST	0	0	0	0	1	1	no
Glyma01g05321	Glyma01g05321	Glyma01g05321	Gm01:5005094-5010084	byo-15-0	byo-15-7	OK	0.185164	2.18094	3.55807	-2.58401	0.00976598	0.11122	no
Glyma01g05330	Glyma01g05330	Glyma01g05330	Gm01:5020413-5021405	byo-15-0	byo-15-7	NOTEST	0	0	0	0	1	1	no
Glyma01g05340	Glyma01g05340	Glyma01g05340	Gm01:5037886-5042760	byo-15-0	byo-15-7	OK	4.89048	2.35187	-1.05617	2.00698	0.044752	0.284044	no
Glyma01g05350	Glyma01g05350	Glyma01g05350	Gm01:5083980-5085647	byo-15-0	byo-15-7	OK	5.11237	6.50306	0.347128	-0.650937	0.515087	0.86745	no
Glyma01g05360	Glyma01g05360	Glyma01g05360	Gm01:5110798-5114049	byo-15-0	byo-15-7	OK	1.54783	2.27142	0.553347	-0.863939	0.387621	0.799022	no
Glyma01g05370	Glyma01g05370	Glyma01g05370	Gm01:5118887-5122289	byo-15-0	byo-15-7	NOTEST	0.374033	0.218665	-0.774443	0.640574	0.5218	1	no
Glyma01g05390	Glyma01g05390	Glyma01g05390	Gm01:5164083-5165652	byo-15-0	byo-15-7	NOTEST	0	0	0	0	1	1	no
Glyma01g05410	Glyma01g05410	Glyma01g05410	Gm01:5213600-5216013	byo-15-0	byo-15-7	OK	10.154	7.06965	-0.522343	1.10287	0.270085	0.703414	no
Glyma01g05430	Glyma01g05430	Glyma01g05430	Gm01:5252557-5258022	byo-15-0	byo-15-7	OK	4.24461	4.85814	0.194772	-0.355436	0.722263	0.945027	no
Glyma01g05435	Glyma01g05435	Glyma01g05435	Gm01:5252557-5258022	byo-15-0	byo-15-7	NOTEST	0	0.174775	1.79769e+308	1.79769e+308	0.389805	1	no
Glyma01g05440	Glyma01g05440	Glyma01g05440	Gm01:5263624-5268235	byo-15-0	byo-15-7	OK	1.74342	1.70078	-0.0357271	0.0574395	0.954195	0.991449	no
Glyma01g05450	Glyma01g05450	Glyma01g05450	Gm01:5286387-5287671	byo-15-0	byo-15-7	OK	0.55524	0.757659	0.448438	-0.509743	0.610232	0.908456	no
Glyma01g05470	Glyma01g05470	Glyma01g05470	Gm01:5303846-5307805	byo-15-0	byo-15-7	OK	3.05008	1.8181	-0.746414	1.16789	0.242851	0.677176	no
Glyma01g05490	Glyma01g05490	Glyma01g05490	Gm01:5313627-5317389	byo-15-0	byo-15-7	OK	9.36922	6.23624	-0.587252	1.05659	0.290697	0.723128	no
Glyma01g05500	Glyma01g05500	Glyma01g05500	Gm01:5324074-5325556	byo-15-0	byo-15-7	OK	1.70786	0.233352	-2.8716	3.38235	0.000718692	0.018277	yes
Glyma01g05521	Glyma01g05521	Glyma01g05521	Gm01:5332060-5334718	byo-15-0	byo-15-7	NOTEST	0	0	0	0	1	1	no
Glyma01g05540	Glyma01g05540	Glyma01g05540	Gm01:5339676-5347885	byo-15-0	byo-15-7	NOTEST	0.265063	0.313483	0.242051	-0.249181	0.80322	1	no
Glyma01g05550	Glyma01g05550	Glyma01g05550	Gm01:5348570-5352305	byo-15-0	byo-15-7	OK	10.6681	8.08341	-0.400272	0.828871	0.407177	0.810526	no
Glyma01g05565	Glyma01g05565	Glyma01g05565	Gm01:5365957-5368432	byo-15-0	byo-15-7	NOTEST	0.311984	0.443437	0.507258	-0.512252	0.608474	1	no
Glyma01g05580	Glyma01g05580	Glyma01g05580	Gm01:5372439-5377697	byo-15-0	byo-15-7	OK	3.08415	1.34967	-1.19226	2.06063	0.0393385	0.26233	no
Glyma01g05680	Glyma01g05680	Glyma01g05680	Gm01:5434961-5437325	byo-15-0	byo-15-7	NOTEST	0	0	0	0	1	1	no
Glyma01g05710	Glyma01g05710	Glyma01g05710	Gm01:5452126-5455897	byo-15-0	byo-15-7	OK	2.71493	2.63342	-0.0439778	0.0832918	0.933619	0.98825	no
Glyma01g05740	Glyma01g05740	Glyma01g05740	Gm01:5471207-5473302	byo-15-0	byo-15-7	OK	38.7035	69.4142	0.842767	-1.72345	0.084808	0.408362	no
Glyma01g05750	Glyma01g05750	Glyma01g05750	Gm01:5490127-5498444	byo-15-0	byo-15-7	OK	7.38137	5.88794	-0.326125	0.669501	0.503176	0.861992	no
Glyma01g05760	Glyma01g05760	Glyma01g05760	Gm01:5490127-5498444	byo-15-0	byo-15-7	OK	2.97708	1.46029	-1.02765	0.469742	0.638539	0.919857	no
Glyma01g05765	Glyma01g05765	Glyma01g05765	Gm01:5500755-5503968	byo-15-0	byo-15-7	OK	0.943464	1.35494	0.522189	-0.653929	0.513157	0.866636	no
Glyma01g05770	Glyma01g05770	Glyma01g05770	Gm01:5507145-5510888	byo-15-0	byo-15-7	OK	0.956171	0.491519	-0.960022	1.07557	0.282119	0.714926	no
Glyma01g05775	Glyma01g05775	Glyma01g05775	Gm01:5515370-5518889	byo-15-0	byo-15-7	NOTEST	0	0	0	0	1	1	no
Glyma01g05780	Glyma01g05780	Glyma01g05780	Gm01:5532190-5532902	byo-15-0	byo-15-7	NOTEST	0	0.429854	1.79769e+308	1.79769e+308	0.0426367	1	no
Glyma01g05800	Glyma01g05800	Glyma01g05800	Gm01:5536188-5540803	byo-15-0	byo-15-7	OK	10.2603	13.0021	0.341664	-0.714975	0.474624	0.846467	no
Glyma01g05805	Glyma01g05805	Glyma01g05805	Gm01:5546122-5546986	byo-15-0	byo-15-7	NOTEST	0	0.0531173	1.79769e+308	1.79769e+308	0.194774	1	no
Glyma01g05810	Glyma01g05810	Glyma01g05810	Gm01:5571757-5573352	byo-15-0	byo-15-7	OK	9.58584	5.08417	-0.914891	1.81187	0.0700065	0.364628	no
Glyma01g05820	Glyma01g05820	Glyma01g05820	Gm01:5576197-5588666	byo-15-0	byo-15-7	OK	3.94852	2.478	-0.672137	0.850084	0.395279	0.803422	no
Glyma01g05830	Glyma01g05830	Glyma01g05830	Gm01:5591933-5594156	byo-15-0	byo-15-7	OK	0.62841	1.71463	1.44812	-2.13173	0.0330289	0.236045	no
Glyma01g05840	Glyma01g05840	Glyma01g05840	Gm01:5603554-5605881	byo-15-0	byo-15-7	NOTEST	0	0	0	0	1	1	no
Glyma01g05850	Glyma01g05850	Glyma01g05850	Gm01:5614232-5617834	byo-15-0	byo-15-7	NOTEST	0	0.113991	1.79769e+308	1.79769e+308	0.0680698	1	no
Glyma01g05860	Glyma01g05860	Glyma01g05860	Gm01:5646198-5652308	byo-15-0	byo-15-7	OK	2.00308	2.55308	0.350015	-0.563921	0.572808	0.893543	no
Glyma01g05871	Glyma01g05871	Glyma01g05871	Gm01:5655285-5657085	byo-15-0	byo-15-7	OK	0.0905593	0.686043	2.92136	-2.09026	0.0365945	0.250314	no
Glyma01g05880	Glyma01g05880	Glyma01g05880	Gm01:5667408-5668624	byo-15-0	byo-15-7	OK	1.58558	2.70489	0.770562	-1.14573	0.251905	0.68776	no
Glyma01g05890	Glyma01g05890	Glyma01g05890	Gm01:5668699-5671152	byo-15-0	byo-15-7	NOTEST	0.256432	0.105001	-1.28817	1.26591	0.205546	1	no
Glyma01g05920	Glyma01g05920	Glyma01g05920	Gm01:5704147-5706648	byo-15-0	byo-15-7	OK	1.31961	3.09037	1.22766	-2.04789	0.0405712	0.267397	no
Glyma01g05933	Glyma01g05933	Glyma01g05933	Gm01:5723315-5724248	byo-15-0	byo-15-7	NOTEST	0	0	0	0	1	1	no
Glyma01g05946	Glyma01g05946	Glyma01g05946	Gm01:5726524-5728292	byo-15-0	byo-15-7	NOTEST	0	0	0	0	1	1	no
Glyma01g05960	Glyma01g05960	Glyma01g05960	Gm01:5750258-5754433	byo-15-0	byo-15-7	OK	1.30671	0.445327	-1.553	2.17768	0.0294298	0.22072	no
Glyma01g05970	Glyma01g05970	Glyma01g05970	Gm01:5789076-5789854	byo-15-0	byo-15-7	NOTEST	0	0.161574	1.79769e+308	1.79769e+308	0.111832	1	no
Glyma01g05980	Glyma01g05980	Glyma01g05980	Gm01:5800710-5803197	byo-15-0	byo-15-7	NOTEST	0	0	0	0	1	1	no
Glyma01g05991	Glyma01g05991	Glyma01g05991	Gm01:5815181-5815856	byo-15-0	byo-15-7	OK	1.04575	0.844149	-0.308965	0.360459	0.718504	0.943977	no
Glyma01g06001	Glyma01g06001	Glyma01g06001	Gm01:5820213-5821125	byo-15-0	byo-15-7	NOTEST	0	0.0480559	1.79769e+308	1.79769e+308	0.271454	1	no
Glyma01g06010	Glyma01g06010	Glyma01g06010	Gm01:5849676-5850474	byo-15-0	byo-15-7	OK	2.63258	3.83405	0.54239	-0.810219	0.417814	0.816221	no
Glyma01g06030	Glyma01g06030	Glyma01g06030	Gm01:5873668-5876124	byo-15-0	byo-15-7	OK	42.9709	44.6833	0.0563765	-0.108978	0.91322	0.984362	no
Glyma01g06060	Glyma01g06060	Glyma01g06060	Gm01:5950520-5957354	byo-15-0	byo-15-7	OK	2.36769	2.21375	-0.0969891	0.139994	0.888665	0.98109	no
Glyma01g06080	Glyma01g06080	Glyma01g06080	Gm01:5980779-5983675	byo-15-0	byo-15-7	OK	7.24864	7.81404	0.108359	-0.207264	0.835803	0.969018	no
Glyma01g06091	Glyma01g06091	Glyma01g06091	Gm01:6001894-6002536	byo-15-0	byo-15-7	NOTEST	0	0	0	0	1	1	no
Glyma01g06101	Glyma01g06101	Glyma01g06101	Gm01:6012889-6016913	byo-15-0	byo-15-7	NOTEST	0	0	0	0	1	1	no
Glyma01g06110	Glyma01g06110	Glyma01g06110	Gm01:6012889-6016913	byo-15-0	byo-15-7	OK	195.461	130.512	-0.582693	1.01346	0.310843	0.739997	no
Glyma01g06121	Glyma01g06121	Glyma01g06121	Gm01:6021842-6025894	byo-15-0	byo-15-7	NOTEST	0	0	0	0	1	1	no
Glyma01g06131	Glyma01g06131	Glyma01g06131	Gm01:6027072-6027783	byo-15-0	byo-15-7	NOTEST	0	0	0	0	1	1	no
Glyma01g06140	Glyma01g06140	Glyma01g06140	Gm01:6036836-6042396	byo-15-0	byo-15-7	NOTEST	0	0	0	0	1	1	no
Glyma01g06150	Glyma01g06150	Glyma01g06150	Gm01:6047154-6049059	byo-15-0	byo-15-7	OK	1.44627	1.2109	-0.256258	0.352807	0.724233	0.945439	no
Glyma01g06170	Glyma01g06170	Glyma01g06170	Gm01:6071138-6081550	byo-15-0	byo-15-7	OK	8.86462	14.431	0.703037	-1.41103	0.158236	0.563202	no
Glyma01g06181	Glyma01g06181	Glyma01g06181	Gm01:6100672-6102037	byo-15-0	byo-15-7	NOTEST	0	0	0	0	1	1	no
Glyma01g06192	Glyma01g06192	Glyma01g06192	Gm01:6238679-6240315	byo-15-0	byo-15-7	NOTEST	0	0	0	0	1	1	no
Glyma01g06203	Glyma01g06203	Glyma01g06203	Gm01:6266528-6267750	byo-15-0	byo-15-7	NOTEST	0	0	0	0	1	1	no
Glyma01g06214	Glyma01g06214	Glyma01g06214	Gm01:6283658-6285214	byo-15-0	byo-15-7	NOTEST	0	0	0	0	1	1	no
Glyma01g06226	Glyma01g06226	Glyma01g06226	Gm01:6285502-6288118	byo-15-0	byo-15-7	NOTEST	0	0	0	0	1	1	no
Glyma01g06238	Glyma01g06238	Glyma01g06238	Gm01:6291503-6292208	byo-15-0	byo-15-7	NOTEST	0	0	0	0	1	1	no
Glyma01g06250	Glyma01g06250	Glyma01g06250	Gm01:6303783-6304910	byo-15-0	byo-15-7	NOTEST	0	0	0	0	1	1	no
Glyma01g06255	Glyma01g06255	Glyma01g06255	Gm01:6305430-6306253	byo-15-0	byo-15-7	NOTEST	0	0	0	0	1	1	no
Glyma01g06260	Glyma01g06260	Glyma01g06260	Gm01:6314251-6321822	byo-15-0	byo-15-7	OK	9.63514	9.11043	-0.0807865	0.162217	0.871135	0.976887	no
Glyma01g06265	Glyma01g06265	Glyma01g06265	Gm01:6323487-6330290	byo-15-0	byo-15-7	OK	2.02527	0.370936	-2.44887	4.04152	5.31062e-05	0.00252956	yes
Glyma01g06270	Glyma01g06270	Glyma01g06270	Gm01:6353278-6357024	byo-15-0	byo-15-7	OK	5.1111	5.27821	0.0464161	-0.0861218	0.93137	0.987718	no
Glyma01g06281	Glyma01g06281	Glyma01g06281	Gm01:6358175-6364839	byo-15-0	byo-15-7	OK	1.11035	0.929952	-0.255782	0.377052	0.706135	0.940606	no
Glyma01g06290	Glyma01g06290	Glyma01g06290	Gm01:6415709-6426123	byo-15-0	byo-15-7	OK	4.87518	7.41849	0.60567	-1.23742	0.215932	0.642918	no
Glyma01g06300	Glyma01g06300	Glyma01g06300	Gm01:6427320-6430789	byo-15-0	byo-15-7	OK	4.3691	16.219	1.89228	-3.76382	0.000167335	0.0061229	yes
Glyma01g06320	Glyma01g06320	Glyma01g06320	Gm01:6438347-6443201	byo-15-0	byo-15-7	OK	4.91788	4.24859	-0.211054	0.371842	0.71001	0.941707	no
Glyma01g06330	Glyma01g06330	Glyma01g06330	Gm01:6463489-6464681	byo-15-0	byo-15-7	NOTEST	0	0	0	0	1	1	no
Glyma01g06350	Glyma01g06350	Glyma01g06350	Gm01:6519357-6525574	byo-15-0	byo-15-7	NOTEST	0	0	0	0	1	1	no
Glyma01g06370	Glyma01g06370	Glyma01g06370	Gm01:6606759-6612290	byo-15-0	byo-15-7	OK	0.683085	0.501048	-0.447116	0.663839	0.506794	0.863842	no
Glyma01g06380	Glyma01g06380	Glyma01g06380	Gm01:6619142-6624870	byo-15-0	byo-15-7	OK	3.19635	5.58301	0.804617	-1.32541	0.185034	0.602992	no
Glyma01g06403	Glyma01g06403	Glyma01g06403	Gm01:6653831-6654651	byo-15-0	byo-15-7	NOTEST	0	0	0	0	1	1	no
Glyma01g06426	Glyma01g06426	Glyma01g06426	Gm01:6655568-6658132	byo-15-0	byo-15-7	NOTEST	0	0	0	0	1	1	no
Glyma01g06450	Glyma01g06450	Glyma01g06450	Gm01:6697229-6704493	byo-15-0	byo-15-7	OK	2.73577	1.67107	-0.711177	1.32436	0.185385	0.603138	no
Glyma01g06465	Glyma01g06465	Glyma01g06465	Gm01:6734268-6734951	byo-15-0	byo-15-7	NOTEST	0	0	0	0	1	1	no
Glyma01g06480	Glyma01g06480	Glyma01g06480	Gm01:6737090-6743586	byo-15-0	byo-15-7	NOTEST	0.188052	0.416609	1.14756	-1.01362	0.310764	1	no
Glyma01g06530	Glyma01g06530	Glyma01g06530	Gm01:6773745-6780125	byo-15-0	byo-15-7	NOTEST	0.0321427	0.0196993	-0.706343	0.230522	0.817686	1	no
Glyma01g06540	Glyma01g06540	Glyma01g06540	Gm01:6785070-6791180	byo-15-0	byo-15-7	OK	2.42558	2.95296	0.283829	-0.370412	0.711075	0.941707	no
Glyma01g06550	Glyma01g06550	Glyma01g06550	Gm01:6797682-6802949	byo-15-0	byo-15-7	OK	0.903699	0.751352	-0.266353	0.378547	0.705024	0.940321	no
Glyma01g06575	Glyma01g06575	Glyma01g06575	Gm01:6821946-6822491	byo-15-0	byo-15-7	NOTEST	0	0	0	0	1	1	no
Glyma01g06600	Glyma01g06600	Glyma01g06600	Gm01:6945949-6947844	byo-15-0	byo-15-7	OK	8.89771	8.19363	-0.118931	0.204587	0.837894	0.969261	no
Glyma01g06610	Glyma01g06610	Glyma01g06610	Gm01:6949449-6956726	byo-15-0	byo-15-7	NOTEST	0	0	0	0	1	1	no
Glyma01g06620	Glyma01g06620	Glyma01g06620	Gm01:6963802-6967415	byo-15-0	byo-15-7	OK	6.1431	7.08911	0.206637	-0.386997	0.698758	0.939187	no
Glyma01g06630	Glyma01g06630	Glyma01g06630	Gm01:6987088-6990503	byo-15-0	byo-15-7	OK	8.412	8.09554	-0.0553214	0.107974	0.914016	0.984472	no
Glyma01g06640	Glyma01g06640	Glyma01g06640	Gm01:6992005-6995011	byo-15-0	byo-15-7	NOTEST	0.380689	0.359679	-0.0819044	0.086705	0.930906	1	no
Glyma01g06660	Glyma01g06660	Glyma01g06660	Gm01:7007301-7012903	byo-15-0	byo-15-7	NOTEST	0	0	0	0	1	1	no
Glyma01g06671	Glyma01g06671	Glyma01g06671	Gm01:7051709-7055503	byo-15-0	byo-15-7	NOTEST	0	0	0	0	1	1	no
Glyma01g06681	Glyma01g06681	Glyma01g06681	Gm01:7074917-7078717	byo-15-0	byo-15-7	OK	3.54336	5.10715	0.527402	-1.10521	0.26907	0.703021	no
Glyma01g06690	Glyma01g06690	Glyma01g06690	Gm01:7089055-7091542	byo-15-0	byo-15-7	OK	0.278008	1.59776	2.52286	-3.39032	0.000698098	0.017944	yes
Glyma01g06700	Glyma01g06700	Glyma01g06700	Gm01:7093539-7097353	byo-15-0	byo-15-7	OK	0.907859	1.42439	0.649807	-0.85516	0.392462	0.801808	no
Glyma01g06720	Glyma01g06720	Glyma01g06720	Gm01:7128540-7130153	byo-15-0	byo-15-7	NOTEST	0	0	0	0	1	1	no
Glyma01g06730	Glyma01g06730	Glyma01g06730	Gm01:7131214-7140582	byo-15-0	byo-15-7	OK	2.03438	1.55267	-0.389834	0.665188	0.50593	0.863527	no
Glyma01g06740	Glyma01g06740	Glyma01g06740	Gm01:7146652-7148230	byo-15-0	byo-15-7	OK	68.8662	47.6087	-0.532572	0.977231	0.328455	0.75462	no
Glyma01g06750	Glyma01g06750	Glyma01g06750	Gm01:7149379-7152784	byo-15-0	byo-15-7	OK	4.58027	5.53875	0.274129	-0.512143	0.608551	0.907841	no
Glyma01g06762	Glyma01g06762	Glyma01g06762	Gm01:7159103-7161168	byo-15-0	byo-15-7	NOTEST	0	0	0	0	1	1	no
Glyma01g06774	Glyma01g06774	Glyma01g06774	Gm01:7193728-7195967	byo-15-0	byo-15-7	NOTEST	0	0.289793	1.79769e+308	1.79769e+308	0.0197361	1	no
Glyma01g06787	Glyma01g06787	Glyma01g06787	Gm01:7202426-7203771	byo-15-0	byo-15-7	OK	2.48124	1.96773	-0.334527	0.414216	0.678716	0.932719	no
Glyma01g06800	Glyma01g06800	Glyma01g06800	Gm01:7209667-7216248	byo-15-0	byo-15-7	OK	6.71459	4.56286	-0.557361	1.02068	0.307406	0.737519	no
Glyma01g06810	Glyma01g06810	Glyma01g06810	Gm01:7209667-7216248	byo-15-0	byo-15-7	NOTEST	0.177504	0.254735	0.521142	-0.142676	0.886546	1	no
Glyma01g06820	Glyma01g06820	Glyma01g06820	Gm01:7217423-7219310	byo-15-0	byo-15-7	OK	1.80201	1.00028	-0.849207	1.08103	0.279683	0.712854	no
Glyma01g06830	Glyma01g06830	Glyma01g06830	Gm01:7247591-7249157	byo-15-0	byo-15-7	NOTEST	0	0	0	0	1	1	no
Glyma01g06840	Glyma01g06840	Glyma01g06840	Gm01:7250230-7254936	byo-15-0	byo-15-7	OK	18.1847	21.3274	0.229984	-0.485445	0.627361	0.916785	no
Glyma01g06850	Glyma01g06850	Glyma01g06850	Gm01:7272747-7275098	byo-15-0	byo-15-7	OK	2.42308	0.95151	-1.34855	1.96869	0.0489887	0.299165	no
Glyma01g06860	Glyma01g06860	Glyma01g06860	Gm01:7277818-7281645	byo-15-0	byo-15-7	NOTEST	0	0	0	0	1	1	no
Glyma01g06870	Glyma01g06870	Glyma01g06870	Gm01:7343212-7351310	byo-15-0	byo-15-7	OK	1.28599	2.33508	0.860594	-1.2924	0.196217	0.616434	no
Glyma01g06880	Glyma01g06880	Glyma01g06880	Gm01:7358248-7360930	byo-15-0	byo-15-7	NOTEST	0.136628	0.0778745	-0.811033	0.773165	0.439425	1	no
Glyma01g06902	Glyma01g06902	Glyma01g06902	Gm01:7382653-7384804	byo-15-0	byo-15-7	NOTEST	0	0	0	0	1	1	no
Glyma01g06924	Glyma01g06924	Glyma01g06924	Gm01:7422342-7427765	byo-15-0	byo-15-7	NOTEST	0	0	0	0	1	1	no
Glyma01g06947	Glyma01g06947	Glyma01g06947	Gm01:7435646-7436810	byo-15-0	byo-15-7	NOTEST	0	0	0	0	1	1	no
Glyma01g06970	Glyma01g06970	Glyma01g06970	Gm01:7479447-7482232	byo-15-0	byo-15-7	OK	11.5789	5.38506	-1.10446	2.30404	0.0212204	0.180081	no
Glyma01g06980	Glyma01g06980	Glyma01g06980	Gm01:7497548-7505696	byo-15-0	byo-15-7	NOTEST	0	0	0	0	1	1	no
Glyma01g06995	Glyma01g06995	Glyma01g06995	Gm01:7509309-7511663	byo-15-0	byo-15-7	NOTEST	0	0	0	0	1	1	no
Glyma01g07010	Glyma01g07010	Glyma01g07010	Gm01:7546180-7550537	byo-15-0	byo-15-7	OK	14.6435	16.2043	0.146116	-0.304346	0.760864	0.954247	no
Glyma01g07020	Glyma01g07020	Glyma01g07020	Gm01:7562682-7571075	byo-15-0	byo-15-7	OK	0.946732	0.793712	-0.25434	0.249709	0.802812	0.962608	no
Glyma01g07040	Glyma01g07040	Glyma01g07040	Gm01:7573115-7574981	byo-15-0	byo-15-7	OK	0.883828	1.14883	0.378328	-0.545571	0.585361	0.898502	no
Glyma01g07046	Glyma01g07046	Glyma01g07046	Gm01:7576240-7581159	byo-15-0	byo-15-7	NOTEST	0.319863	0.218388	-0.550562	0.513141	0.607853	1	no
Glyma01g07053	Glyma01g07053	Glyma01g07053	Gm01:7587960-7591978	byo-15-0	byo-15-7	NOTEST	0	0	0	0	1	1	no
Glyma01g07060	Glyma01g07060	Glyma01g07060	Gm01:7606030-7608993	byo-15-0	byo-15-7	NOTEST	0	0	0	0	1	1	no
Glyma01g07070	Glyma01g07070	Glyma01g07070	Gm01:7614281-7618124	byo-15-0	byo-15-7	OK	5.01443	5.93683	0.243605	-0.472642	0.636469	0.919576	no
Glyma01g07080	Glyma01g07080	Glyma01g07080	Gm01:7621975-7627809	byo-15-0	byo-15-7	OK	0.628968	0	-1.79769e+308	-1.79769e+308	0.239657	0.673456	no
Glyma01g07091	Glyma01g07091	Glyma01g07091	Gm01:7621975-7627809	byo-15-0	byo-15-7	OK	2.34241	5.81616	1.31207	-2.54325	0.0109825	0.119726	no
Glyma01g07100	Glyma01g07100	Glyma01g07100	Gm01:7645596-7648115	byo-15-0	byo-15-7	OK	31.1892	18.8688	-0.725047	1.52369	0.127587	0.506601	no
Glyma01g07110	Glyma01g07110	Glyma01g07110	Gm01:7657795-7664672	byo-15-0	byo-15-7	NOTEST	0.148235	0	-1.79769e+308	-1.79769e+308	0.0315054	1	no
Glyma01g07120	Glyma01g07120	Glyma01g07120	Gm01:7694027-7700472	byo-15-0	byo-15-7	OK	33.4842	21.0439	-0.67008	1.14794	0.250991	0.687056	no
Glyma01g07130	Glyma01g07130	Glyma01g07130	Gm01:7726769-7727260	byo-15-0	byo-15-7	OK	328.303	205.503	-0.675865	1.38142	0.167149	0.576368	no
Glyma01g07140	Glyma01g07140	Glyma01g07140	Gm01:7745867-7748795	byo-15-0	byo-15-7	OK	0.688407	1.36945	0.992269	-1.27652	0.201771	0.62416	no
Glyma01g07150	Glyma01g07150	Glyma01g07150	Gm01:7755456-7755710	byo-15-0	byo-15-7	NOTEST	0	0	0	0	1	1	no
Glyma01g07155	Glyma01g07155	Glyma01g07155	Gm01:7761366-7761600	byo-15-0	byo-15-7	NOTEST	0	0	0	0	1	1	no
Glyma01g07160	Glyma01g07160	Glyma01g07160	Gm01:7762334-7764158	byo-15-0	byo-15-7	OK	0.587537	1.20661	1.03821	-1.33071	0.183284	0.600368	no
Glyma01g07175	Glyma01g07175	Glyma01g07175	Gm01:7777226-7781079	byo-15-0	byo-15-7	OK	2.83267	2.35995	-0.263408	0.435981	0.66285	0.926707	no
Glyma01g07190	Glyma01g07190	Glyma01g07190	Gm01:7781287-7786746	byo-15-0	byo-15-7	OK	1.83517	1.97298	0.104465	-0.138063	0.89019	0.981468	no
Glyma01g07212	Glyma01g07212	Glyma01g07212	Gm01:7794008-7794422	byo-15-0	byo-15-7	NOTEST	0	0	0	0	1	1	no
Glyma01g07234	Glyma01g07234	Glyma01g07234	Gm01:7804303-7805165	byo-15-0	byo-15-7	OK	0.322377	0.519943	0.689605	-0.688211	0.49132	0.855476	no
Glyma01g07256	Glyma01g07256	Glyma01g07256	Gm01:7805183-7807029	byo-15-0	byo-15-7	NOTEST	0	0	0	0	1	1	no
Glyma01g07278	Glyma01g07278	Glyma01g07278	Gm01:7894471-7899056	byo-15-0	byo-15-7	NOTEST	0	0	0	0	1	1	no
Glyma01g07300	Glyma01g07300	Glyma01g07300	Gm01:7959018-7960497	byo-15-0	byo-15-7	OK	1.03988	1.47888	0.50809	-0.66786	0.504223	0.862416	no
Glyma01g07310	Glyma01g07310	Glyma01g07310	Gm01:7961184-7963298	byo-15-0	byo-15-7	OK	1.1298	1.49563	0.404688	-0.471532	0.637261	0.919576	no
Glyma01g07320	Glyma01g07320	Glyma01g07320	Gm01:7976530-7977692	byo-15-0	byo-15-7	NOTEST	0	0	0	0	1	1	no
Glyma01g07343	Glyma01g07343	Glyma01g07343	Gm01:8062113-8062653	byo-15-0	byo-15-7	NOTEST	0	0	0	0	1	1	no
Glyma01g07366	Glyma01g07366	Glyma01g07366	Gm01:8067733-8073984	byo-15-0	byo-15-7	NOTEST	0	0	0	0	1	1	no
Glyma01g07390	Glyma01g07390	Glyma01g07390	Gm01:8081945-8087022	byo-15-0	byo-15-7	OK	0.927389	0.284433	-1.70509	2.05354	0.0400205	0.264777	no
Glyma01g07416	Glyma01g07416	Glyma01g07416	Gm01:8182612-8184549	byo-15-0	byo-15-7	NOTEST	0	0	0	0	1	1	no
Glyma01g07443	Glyma01g07443	Glyma01g07443	Gm01:8199812-8203907	byo-15-0	byo-15-7	NOTEST	0	0	0	0	1	1	no
Glyma01g07470	Glyma01g07470	Glyma01g07470	Gm01:8280629-8281870	byo-15-0	byo-15-7	NOTEST	0	0	0	0	1	1	no
Glyma01g07500	Glyma01g07500	Glyma01g07500	Gm01:8288472-8290635	byo-15-0	byo-15-7	NOTEST	0	0	0	0	1	1	no
Glyma01g07530	Glyma01g07530	Glyma01g07530	Gm01:8321044-8331324	byo-15-0	byo-15-7	OK	2.50362	5.38613	1.10524	-2.1718	0.0298709	0.223006	no
Glyma01g07542	Glyma01g07542	Glyma01g07542	Gm01:8338977-8341376	byo-15-0	byo-15-7	NOTEST	0.213746	0.376289	0.815944	-0.785966	0.431887	1	no
Glyma01g07554	Glyma01g07554	Glyma01g07554	Gm01:8344184-8347552	byo-15-0	byo-15-7	OK	36.811	24.406	-0.592902	1.25094	0.210958	0.636454	no
Glyma01g07567	Glyma01g07567	Glyma01g07567	Gm01:8348953-8350397	byo-15-0	byo-15-7	OK	0.7181	0.910869	0.343058	-0.422964	0.672322	0.931412	no
Glyma01g07580	Glyma01g07580	Glyma01g07580	Gm01:8387061-8389448	byo-15-0	byo-15-7	OK	10.8555	10.6264	-0.0307775	0.0651181	0.94808	0.990962	no
Glyma01g07601	Glyma01g07601	Glyma01g07601	Gm01:8400738-8401869	byo-15-0	byo-15-7	NOTEST	0	0	0	0	1	1	no
Glyma01g07621	Glyma01g07621	Glyma01g07621	Gm01:8410014-8411417	byo-15-0	byo-15-7	NOTEST	0	0	0	0	1	1	no
Glyma01g07641	Glyma01g07641	Glyma01g07641	Gm01:8426105-8455213	byo-15-0	byo-15-7	OK	3.42995	3.69069	0.105701	-0.214968	0.829792	0.967056	no
Glyma01g07661	Glyma01g07661	Glyma01g07661	Gm01:8426105-8455213	byo-15-0	byo-15-7	NOTEST	0.0713027	0.125851	0.819684	-0.20453	0.83794	1	no
Glyma01g07680	Glyma01g07680	Glyma01g07680	Gm01:8471437-8478753	byo-15-0	byo-15-7	OK	1.87791	2.70048	0.524088	-1.07098	0.28418	0.716768	no
Glyma01g07690	Glyma01g07690	Glyma01g07690	Gm01:8483094-8485802	byo-15-0	byo-15-7	OK	1.77178	2.00501	0.178411	-0.326709	0.743888	0.950404	no
Glyma01g07716	Glyma01g07716	Glyma01g07716	Gm01:8488370-8491061	byo-15-0	byo-15-7	NOTEST	0	0	0	0	1	1	no
Glyma01g07743	Glyma01g07743	Glyma01g07743	Gm01:8512443-8513748	byo-15-0	byo-15-7	NOTEST	0	0	0	0	1	1	no
Glyma01g07770	Glyma01g07770	Glyma01g07770	Gm01:8571080-8576705	byo-15-0	byo-15-7	OK	11.4446	9.72787	-0.234471	0.479873	0.631318	0.917848	no
Glyma01g07780	Glyma01g07780	Glyma01g07780	Gm01:8580150-8584320	byo-15-0	byo-15-7	OK	2.78747	8.31867	1.5774	-3.09093	0.00199528	0.0386168	yes
Glyma01g07791	Glyma01g07791	Glyma01g07791	Gm01:8585310-8588909	byo-15-0	byo-15-7	OK	0.610249	1.26779	1.05484	-1.33232	0.182757	0.599651	no
Glyma01g07800	Glyma01g07800	Glyma01g07800	Gm01:8594093-8595436	byo-15-0	byo-15-7	OK	6.55819	6.49009	-0.0150583	0.0290455	0.976828	0.995489	no
Glyma01g07860	Glyma01g07860	Glyma01g07860	Gm01:8667868-8673493	byo-15-0	byo-15-7	NOTEST	0	0.0315838	1.79769e+308	1.79769e+308	0.111832	1	no
Glyma01g07876	Glyma01g07876	Glyma01g07876	Gm01:8788410-8789743	byo-15-0	byo-15-7	NOTEST	0.0330065	0.0186482	-0.823713	0.227452	0.820072	1	no
Glyma01g07893	Glyma01g07893	Glyma01g07893	Gm01:8792135-8793707	byo-15-0	byo-15-7	NOTEST	0	0	0	0	1	1	no
Glyma01g07910	Glyma01g07910	Glyma01g07910	Gm01:8838722-8843110	byo-15-0	byo-15-7	NOTEST	0	0	0	0	1	1	no
Glyma01g07930	Glyma01g07930	Glyma01g07930	Gm01:8874759-8878203	byo-15-0	byo-15-7	OK	13.957	11.1514	-0.32376	0.683075	0.494559	0.857121	no
Glyma01g07940	Glyma01g07940	Glyma01g07940	Gm01:8910470-8913789	byo-15-0	byo-15-7	OK	2.1548	0.446313	-2.27143	3.16024	0.0015764	0.0326862	yes
Glyma01g07970	Glyma01g07970	Glyma01g07970	Gm01:8936938-8942561	byo-15-0	byo-15-7	NOTEST	0	0	0	0	1	1	no
Glyma01g07985	Glyma01g07985	Glyma01g07985	Gm01:8949064-8950284	byo-15-0	byo-15-7	NOTEST	0.0729029	0.120464	0.724557	-0.324194	0.745791	1	no
Glyma01g08001	Glyma01g08001	Glyma01g08001	Gm01:8978273-8979785	byo-15-0	byo-15-7	NOTEST	0	0	0	0	1	1	no
Glyma01g08015	Glyma01g08015	Glyma01g08015	Gm01:8998365-8999926	byo-15-0	byo-15-7	NOTEST	0	0	0	0	1	1	no
Glyma01g08030	Glyma01g08030	Glyma01g08030	Gm01:9017676-9019966	byo-15-0	byo-15-7	NOTEST	0	0	0	0	1	1	no
Glyma01g08043	Glyma01g08043	Glyma01g08043	Gm01:9021976-9042121	byo-15-0	byo-15-7	OK	0.99568	1.79682	0.851695	-1.59333	0.111086	0.473677	no
Glyma01g08056	Glyma01g08056	Glyma01g08056	Gm01:9051046-9057050	byo-15-0	byo-15-7	OK	2.22712	0.577276	-1.94785	2.8597	0.00424048	0.0634074	no
Glyma01g08070	Glyma01g08070	Glyma01g08070	Gm01:9109611-9110650	byo-15-0	byo-15-7	NOTEST	0	0	0	0	1	1	no
Glyma01g08080	Glyma01g08080	Glyma01g08080	Gm01:9174134-9176210	byo-15-0	byo-15-7	OK	0.734602	0.333344	-1.13995	1.43198	0.15215	0.552566	no
Glyma01g08096	Glyma01g08096	Glyma01g08096	Gm01:9198539-9199466	byo-15-0	byo-15-7	NOTEST	0.148935	0.0807691	-0.882809	0.422222	0.672863	1	no
Glyma01g08113	Glyma01g08113	Glyma01g08113	Gm01:9252869-9254570	byo-15-0	byo-15-7	NOTEST	0	0	0	0	1	1	no
Glyma01g08130	Glyma01g08130	Glyma01g08130	Gm01:9331637-9344994	byo-15-0	byo-15-7	NOTEST	0	0	0	0	1	1	no
Glyma01g08150	Glyma01g08150	Glyma01g08150	Gm01:9446809-9451393	byo-15-0	byo-15-7	NOTEST	0.302043	0.367777	0.284077	-0.30802	0.758067	1	no
Glyma01g08191	Glyma01g08191	Glyma01g08191	Gm01:9525972-9529696	byo-15-0	byo-15-7	NOTEST	0	0	0	0	1	1	no
Glyma01g08230	Glyma01g08230	Glyma01g08230	Gm01:9575252-9581967	byo-15-0	byo-15-7	OK	3.89174	4.20572	0.111937	-0.218451	0.827078	0.966534	no
Glyma01g08250	Glyma01g08250	Glyma01g08250	Gm01:9636460-9637409	byo-15-0	byo-15-7	NOTEST	0	0	0	0	1	1	no
Glyma01g08260	Glyma01g08260	Glyma01g08260	Gm01:9642089-9646537	byo-15-0	byo-15-7	OK	1.01025	0.361654	-1.48203	1.68152	0.0926627	0.428741	no
Glyma01g08400	Glyma01g08400	Glyma01g08400	Gm01:9844796-9845510	byo-15-0	byo-15-7	NOTEST	0	0	0	0	1	1	no
Glyma01g08540	Glyma01g08540	Glyma01g08540	Gm01:9914169-9919593	byo-15-0	byo-15-7	OK	3.2465	2.59665	-0.322236	0.58199	0.560574	0.887738	no
Glyma01g08560	Glyma01g08560	Glyma01g08560	Gm01:9947412-9949603	byo-15-0	byo-15-7	NOTEST	0	0	0	0	1	1	no
Glyma01g08580	Glyma01g08580	Glyma01g08580	Gm01:9980287-9986041	byo-15-0	byo-15-7	OK	9.36705	6.10069	-0.618623	1.27606	0.201934	0.624227	no
Glyma01g08586	Glyma01g08586	Glyma01g08586	Gm01:10000985-10002625	byo-15-0	byo-15-7	NOTEST	0	0	0	0	1	1	no
Glyma01g08593	Glyma01g08593	Glyma01g08593	Gm01:10003770-10020103	byo-15-0	byo-15-7	NOTEST	0	0	0	0	1	1	no
Glyma01g08600	Glyma01g08600	Glyma01g08600	Gm01:10022026-10027778	byo-15-0	byo-15-7	OK	8.40546	3.40416	-1.30403	2.53306	0.0113071	0.121855	no
Glyma01g08610	Glyma01g08610	Glyma01g08610	Gm01:10032095-10036624	byo-15-0	byo-15-7	NOTEST	0	0.0363091	1.79769e+308	1.79769e+308	0.194774	1	no
Glyma01g08621	Glyma01g08621	Glyma01g08621	Gm01:10051789-10059800	byo-15-0	byo-15-7	NOTEST	0	0	0	0	1	1	no
Glyma01g08631	Glyma01g08631	Glyma01g08631	Gm01:10051789-10059800	byo-15-0	byo-15-7	NOTEST	0	0	0	0	1	1	no
Glyma01g08640	Glyma01g08640	Glyma01g08640	Gm01:10086673-10091927	byo-15-0	byo-15-7	NOTEST	0.0194495	0.154165	2.98667	-1.80218	0.0715169	1	no
Glyma01g08650	Glyma01g08650	Glyma01g08650	Gm01:10086673-10091927	byo-15-0	byo-15-7	NOTEST	0	0	0	0	1	1	no
Glyma01g08690	Glyma01g08690	Glyma01g08690	Gm01:10142572-10144504	byo-15-0	byo-15-7	NOTEST	0	0	0	0	1	1	no
Glyma01g08730	Glyma01g08730	Glyma01g08730	Gm01:10288660-10290556	byo-15-0	byo-15-7	NOTEST	0	0	0	0	1	1	no
Glyma01g08745	Glyma01g08745	Glyma01g08745	Gm01:10293654-10294541	byo-15-0	byo-15-7	NOTEST	0	0	0	0	1	1	no
Glyma01g08760	Glyma01g08760	Glyma01g08760	Gm01:10355582-10357514	byo-15-0	byo-15-7	NOTEST	0	0	0	0	1	1	no
Glyma01g08870	Glyma01g08870	Glyma01g08870	Gm01:10370136-10371995	byo-15-0	byo-15-7	NOTEST	0	0	0	0	1	1	no
Glyma01g08980	Glyma01g08980	Glyma01g08980	Gm01:10504878-10510246	byo-15-0	byo-15-7	NOTEST	0	0	0	0	1	1	no
Glyma01g09000	Glyma01g09000	Glyma01g09000	Gm01:10570987-10572412	byo-15-0	byo-15-7	NOTEST	0	0	0	0	1	1	no
Glyma01g09010	Glyma01g09010	Glyma01g09010	Gm01:10577946-10583595	byo-15-0	byo-15-7	OK	7.71902	8.6099	0.157579	-0.287228	0.773938	0.956148	no
Glyma01g09040	Glyma01g09040	Glyma01g09040	Gm01:10601638-10602621	byo-15-0	byo-15-7	NOTEST	0	0	0	0	1	1	no
Glyma01g09066	Glyma01g09066	Glyma01g09066	Gm01:10604268-10604624	byo-15-0	byo-15-7	NOTEST	0	0	0	0	1	1	no
Glyma01g09093	Glyma01g09093	Glyma01g09093	Gm01:10716118-10717174	byo-15-0	byo-15-7	NOTEST	0	0	0	0	1	1	no
Glyma01g09120	Glyma01g09120	Glyma01g09120	Gm01:10765526-10768563	byo-15-0	byo-15-7	OK	5.44969	7.71347	0.501205	-1.05715	0.290445	0.723128	no
Glyma01g09160	Glyma01g09160	Glyma01g09160	Gm01:10877246-10880169	byo-15-0	byo-15-7	OK	2.21128	3.89644	0.817271	-1.47092	0.141314	0.533213	no
Glyma01g09190	Glyma01g09190	Glyma01g09190	Gm01:10916139-10919654	byo-15-0	byo-15-7	NOTEST	0	0	0	0	1	1	no
Glyma01g09205	Glyma01g09205	Glyma01g09205	Gm01:10925539-10932891	byo-15-0	byo-15-7	OK	0.83136	0.438192	-0.923909	1.03057	0.302743	0.733605	no
Glyma01g09220	Glyma01g09220	Glyma01g09220	Gm01:10985768-10988999	byo-15-0	byo-15-7	OK	1.80883	1.58495	-0.19062	0.298397	0.7654	0.95488	no
Glyma01g09251	Glyma01g09251	Glyma01g09251	Gm01:11062433-11064112	byo-15-0	byo-15-7	NOTEST	0	0	0	0	1	1	no
Glyma01g09280	Glyma01g09280	Glyma01g09280	Gm01:11172148-11173850	byo-15-0	byo-15-7	NOTEST	0	0	0	0	1	1	no
Glyma01g09290	Glyma01g09290	Glyma01g09290	Gm01:11208547-11216038	byo-15-0	byo-15-7	OK	5.79606	6.13414	0.0817876	-0.163096	0.870443	0.976783	no
Glyma01g09310	Glyma01g09310	Glyma01g09310	Gm01:11247803-11256961	byo-15-0	byo-15-7	OK	73.7398	74.9497	0.0234787	-0.0397418	0.968299	0.994158	no
Glyma01g09340	Glyma01g09340	Glyma01g09340	Gm01:11290152-11290409	byo-15-0	byo-15-7	OK	0	1.18167	1.79769e+308	1.79769e+308	0.194774	0.614215	no
Glyma01g09350	Glyma01g09350	Glyma01g09350	Gm01:11294639-11296592	byo-15-0	byo-15-7	NOTEST	0	0	0	0	1	1	no
Glyma01g09360	Glyma01g09360	Glyma01g09360	Gm01:11308064-11312690	byo-15-0	byo-15-7	OK	0.930171	0.430359	-1.11196	1.32493	0.185193	0.603075	no
Glyma01g09381	Glyma01g09381	Glyma01g09381	Gm01:11366555-11369128	byo-15-0	byo-15-7	NOTEST	0	0	0	0	1	1	no
Glyma01g09400	Glyma01g09400	Glyma01g09400	Gm01:11464172-11469476	byo-15-0	byo-15-7	OK	3.63301	5.07349	0.481814	-0.8924	0.372179	0.789815	no
Glyma01g09410	Glyma01g09410	Glyma01g09410	Gm01:11464172-11469476	byo-15-0	byo-15-7	NOTEST	0	0	0	0	1	1	no
Glyma01g09420	Glyma01g09420	Glyma01g09420	Gm01:11496634-11503018	byo-15-0	byo-15-7	OK	2.88786	1.64235	-0.81424	1.30494	0.191912	0.612126	no
Glyma01g09460	Glyma01g09460	Glyma01g09460	Gm01:11555183-11556227	byo-15-0	byo-15-7	OK	1.85574	3.53392	0.929273	-1.27673	0.201699	0.624016	no
Glyma01g09481	Glyma01g09481	Glyma01g09481	Gm01:11560220-11561128	byo-15-0	byo-15-7	NOTEST	0	0	0	0	1	1	no
Glyma01g09500	Glyma01g09500	Glyma01g09500	Gm01:11608787-11608970	byo-15-0	byo-15-7	NOTEST	0	0	0	0	1	1	no
Glyma01g09510	Glyma01g09510	Glyma01g09510	Gm01:11675230-11676337	byo-15-0	byo-15-7	NOTEST	0.148473	0	-1.79769e+308	-1.79769e+308	0.0512004	1	no
Glyma01g09515	Glyma01g09515	Glyma01g09515	Gm01:11687514-11688465	byo-15-0	byo-15-7	NOTEST	0	0	0	0	1	1	no
Glyma01g09520	Glyma01g09520	Glyma01g09520	Gm01:11695475-11701510	byo-15-0	byo-15-7	OK	8.01356	19.9081	1.31284	-2.7362	0.00621525	0.0823633	no
Glyma01g09530	Glyma01g09530	Glyma01g09530	Gm01:11703243-11703468	byo-15-0	byo-15-7	OK	12.4719	12.7846	0.0357344	-0.0293435	0.976591	0.995442	no
Glyma01g09540	Glyma01g09540	Glyma01g09540	Gm01:11708034-11708550	byo-15-0	byo-15-7	NOTEST	0.423086	0	-1.79769e+308	-1.79769e+308	0.207061	1	no
Glyma01g09581	Glyma01g09581	Glyma01g09581	Gm01:11738401-11738872	byo-15-0	byo-15-7	NOTEST	0	0	0	0	1	1	no
Glyma01g09620	Glyma01g09620	Glyma01g09620	Gm01:11916861-11920298	byo-15-0	byo-15-7	NOTEST	0	0	0	0	1	1	no
Glyma01g09631	Glyma01g09631	Glyma01g09631	Gm01:11934522-11935027	byo-15-0	byo-15-7	NOTEST	0	0	0	0	1	1	no
Glyma01g09640	Glyma01g09640	Glyma01g09640	Gm01:11967121-11968573	byo-15-0	byo-15-7	OK	4.69961	5.01364	0.0933191	-0.177559	0.859069	0.974479	no
Glyma01g09650	Glyma01g09650	Glyma01g09650	Gm01:11971139-11974007	byo-15-0	byo-15-7	NOTEST	0	0	0	0	1	1	no
Glyma01g09660	Glyma01g09660	Glyma01g09660	Gm01:11996466-12008222	byo-15-0	byo-15-7	OK	1.78922	1.76057	-0.023292	0.0380585	0.969641	0.994304	no
Glyma01g09860	Glyma01g09860	Glyma01g09860	Gm01:12384414-12385443	byo-15-0	byo-15-7	NOTEST	0	0	0	0	1	1	no
Glyma01g09900	Glyma01g09900	Glyma01g09900	Gm01:12528614-12537191	byo-15-0	byo-15-7	NOTEST	0.380724	0.0797255	-2.25563	1.74657	0.0807123	1	no
Glyma01g09920	Glyma01g09920	Glyma01g09920	Gm01:12588417-12590126	byo-15-0	byo-15-7	OK	2.54987	3.6435	0.514904	-0.86323	0.388011	0.799059	no
Glyma01g09948	Glyma01g09948	Glyma01g09948	Gm01:12598148-12598766	byo-15-0	byo-15-7	NOTEST	0	0	0	0	1	1	no
Glyma01g09976	Glyma01g09976	Glyma01g09976	Gm01:12599050-12599537	byo-15-0	byo-15-7	NOTEST	0	0	0	0	1	1	no
Glyma01g10004	Glyma01g10004	Glyma01g10004	Gm01:12745024-12746402	byo-15-0	byo-15-7	NOTEST	0	0	0	0	1	1	no
Glyma01g10032	Glyma01g10032	Glyma01g10032	Gm01:12760733-12762383	byo-15-0	byo-15-7	NOTEST	0	0.0457065	1.79769e+308	1.79769e+308	0.271454	1	no
Glyma01g10060	Glyma01g10060	Glyma01g10060	Gm01:12803637-12806519	byo-15-0	byo-15-7	NOTEST	0	0.038435	1.79769e+308	1.79769e+308	0.194774	1	no
Glyma01g10070	Glyma01g10070	Glyma01g10070	Gm01:12864161-12867113	byo-15-0	byo-15-7	LOWDATA	0	0	-0.870029	0	1	1	no
Glyma01g10081	Glyma01g10081	Glyma01g10081	Gm01:12864161-12867113	byo-15-0	byo-15-7	OK	294.589	161.18	-0.870029	1.33432	0.1821	0.598634	no
Glyma01g10090	Glyma01g10090	Glyma01g10090	Gm01:12870303-12870537	byo-15-0	byo-15-7	NOTEST	0	0	0	0	1	1	no
Glyma01g10100	Glyma01g10100	Glyma01g10100	Gm01:12915879-12921146	byo-15-0	byo-15-7	OK	1.51189	1.15826	-0.384393	0.652808	0.51388	0.866735	no
Glyma01g10121	Glyma01g10121	Glyma01g10121	Gm01:13008740-13009964	byo-15-0	byo-15-7	NOTEST	0.120167	0.0671804	-0.838928	0.401235	0.688247	1	no
Glyma01g10141	Glyma01g10141	Glyma01g10141	Gm01:13045087-13045509	byo-15-0	byo-15-7	NOTEST	0	0	0	0	1	1	no
Glyma01g10160	Glyma01g10160	Glyma01g10160	Gm01:13068289-13070591	byo-15-0	byo-15-7	OK	1.41586	1.05036	-0.430795	0.590355	0.554953	0.885529	no
Glyma01g10183	Glyma01g10183	Glyma01g10183	Gm01:13094881-13100738	byo-15-0	byo-15-7	NOTEST	0	0	0	0	1	1	no
Glyma01g10206	Glyma01g10206	Glyma01g10206	Gm01:13259515-13263715	byo-15-0	byo-15-7	NOTEST	0	0	0	0	1	1	no
Glyma01g10231	Glyma01g10231	Glyma01g10231	Gm01:13305441-13308517	byo-15-0	byo-15-7	NOTEST	0	0	0	0	1	1	no
Glyma01g10254	Glyma01g10254	Glyma01g10254	Gm01:13309389-13321481	byo-15-0	byo-15-7	NOTEST	0	0	0	0	1	1	no
Glyma01g10278	Glyma01g10278	Glyma01g10278	Gm01:13324783-13327645	byo-15-0	byo-15-7	NOTEST	0	0	0	0	1	1	no
Glyma01g10302	Glyma01g10302	Glyma01g10302	Gm01:13355409-13356481	byo-15-0	byo-15-7	NOTEST	0	0	0	0	1	1	no
Glyma01g10326	Glyma01g10326	Glyma01g10326	Gm01:13416710-13417813	byo-15-0	byo-15-7	NOTEST	0	0	0	0	1	1	no
Glyma01g10350	Glyma01g10350	Glyma01g10350	Gm01:13419562-13420937	byo-15-0	byo-15-7	NOTEST	0	0	0	0	1	1	no
Glyma01g10371	Glyma01g10371	Glyma01g10371	Gm01:13433576-13434202	byo-15-0	byo-15-7	OK	1.33868	2.76965	1.04889	-1.38038	0.167471	0.576528	no
Glyma01g10390	Glyma01g10390	Glyma01g10390	Gm01:13444506-13445181	byo-15-0	byo-15-7	OK	0.964884	0.142661	-2.75776	1.50955	0.131159	0.512992	no
Glyma01g10600	Glyma01g10600	Glyma01g10600	Gm01:13782194-13783121	byo-15-0	byo-15-7	NOTEST	0.0788413	0	-1.79769e+308	-1.79769e+308	0.124059	1	no
Glyma01g10610	Glyma01g10610	Glyma01g10610	Gm01:13795843-13799755	byo-15-0	byo-15-7	OK	1.8285	2.03694	0.155742	-0.269403	0.78762	0.958186	no
Glyma01g10730	Glyma01g10730	Glyma01g10730	Gm01:13960625-13962588	byo-15-0	byo-15-7	OK	0.608081	1.05811	0.799153	-0.878855	0.37948	0.795215	no
Glyma01g10850	Glyma01g10850	Glyma01g10850	Gm01:14070871-14087892	byo-15-0	byo-15-7	OK	1.9654	3.05293	0.635367	-1.12097	0.262303	0.697336	no
Glyma01g10880	Glyma01g10880	Glyma01g10880	Gm01:14112119-14118766	byo-15-0	byo-15-7	OK	1.74803	2.42526	0.472412	-0.785965	0.431888	0.824743	no
Glyma01g10900	Glyma01g10900	Glyma01g10900	Gm01:14129302-14130710	byo-15-0	byo-15-7	NOTEST	0	0	0	0	1	1	no
Glyma01g11110	Glyma01g11110	Glyma01g11110	Gm01:14247142-14248189	byo-15-0	byo-15-7	NOTEST	0	0	0	0	1	1	no
Glyma01g11130	Glyma01g11130	Glyma01g11130	Gm01:14320794-14324110	byo-15-0	byo-15-7	NOTEST	0	0	0	0	1	1	no
Glyma01g11180	Glyma01g11180	Glyma01g11180	Gm01:14568533-14568824	byo-15-0	byo-15-7	OK	15459.7	18723.7	0.276349	-0.361281	0.71789	0.943894	no
Glyma01g11390	Glyma01g11390	Glyma01g11390	Gm01:14807028-14809655	byo-15-0	byo-15-7	OK	12.7306	12.2698	-0.0531825	0.0993316	0.920875	0.985614	no
Glyma01g11473	Glyma01g11473	Glyma01g11473	Gm01:14947313-14947773	byo-15-0	byo-15-7	NOTEST	0	0	0	0	1	1	no
Glyma01g11556	Glyma01g11556	Glyma01g11556	Gm01:14947841-14948129	byo-15-0	byo-15-7	NOTEST	0	0	0	0	1	1	no
Glyma01g11640	Glyma01g11640	Glyma01g11640	Gm01:14972818-14973806	byo-15-0	byo-15-7	OK	133.563	45.3265	-1.5591	3.13808	0.00170061	0.0345476	yes
Glyma01g11755	Glyma01g11755	Glyma01g11755	Gm01:15083417-15085790	byo-15-0	byo-15-7	NOTEST	0	0	0	0	1	1	no
Glyma01g11870	Glyma01g11870	Glyma01g11870	Gm01:15195053-15195880	byo-15-0	byo-15-7	OK	103.763	95.2681	-0.123233	0.248192	0.803986	0.962778	no
Glyma01g12310	Glyma01g12310	Glyma01g12310	Gm01:15500343-15500912	byo-15-0	byo-15-7	NOTEST	0	0	0	0	1	1	no
Glyma01g12340	Glyma01g12340	Glyma01g12340	Gm01:15542210-15548262	byo-15-0	byo-15-7	OK	7.79613	5.85539	-0.412992	0.830232	0.406408	0.810231	no
Glyma01g12740	Glyma01g12740	Glyma01g12740	Gm01:15937028-15939729	byo-15-0	byo-15-7	OK	3.60228	3.2569	-0.145409	0.299244	0.764754	0.954738	no
Glyma01g12840	Glyma01g12840	Glyma01g12840	Gm01:15948220-15953470	byo-15-0	byo-15-7	NOTEST	0.0871094	0.0493001	-0.821237	0.331508	0.740261	1	no
Glyma01g12940	Glyma01g12940	Glyma01g12940	Gm01:16087453-16089518	byo-15-0	byo-15-7	OK	0.63069	0.511956	-0.300911	0.37336	0.708881	0.941522	no
Glyma01g12955	Glyma01g12955	Glyma01g12955	Gm01:16103170-16106499	byo-15-0	byo-15-7	NOTEST	0	0	0	0	1	1	no
Glyma01g12970	Glyma01g12970	Glyma01g12970	Gm01:16134796-16136261	byo-15-0	byo-15-7	OK	3.249	3.00877	-0.110825	0.197193	0.843676	0.970636	no
Glyma01g13170	Glyma01g13170	Glyma01g13170	Gm01:16335425-16339127	byo-15-0	byo-15-7	OK	104.619	16.2288	-2.68851	5.03442	4.79295e-07	5.92536e-05	yes
Glyma01g13390	Glyma01g13390	Glyma01g13390	Gm01:16722784-16724403	byo-15-0	byo-15-7	NOTEST	0	0	0	0	1	1	no
Glyma01g13400	Glyma01g13400	Glyma01g13400	Gm01:16727753-16728455	byo-15-0	byo-15-7	NOTEST	0	0	0	0	1	1	no
Glyma01g13410	Glyma01g13410	Glyma01g13410	Gm01:16732842-16733939	byo-15-0	byo-15-7	NOTEST	0	0.0689512	1.79769e+308	1.79769e+308	0.111832	1	no
Glyma01g13532	Glyma01g13532	Glyma01g13532	Gm01:16745457-16750194	byo-15-0	byo-15-7	OK	0.262092	0.622278	1.24749	-0.976805	0.328666	0.754904	no
Glyma01g13654	Glyma01g13654	Glyma01g13654	Gm01:16827427-16868761	byo-15-0	byo-15-7	OK	2.88314	3.23728	0.167141	-0.293585	0.769075	0.95536	no
Glyma01g13777	Glyma01g13777	Glyma01g13777	Gm01:16940733-16941754	byo-15-0	byo-15-7	NOTEST	0	0	0	0	1	1	no
Glyma01g13900	Glyma01g13900	Glyma01g13900	Gm01:17306260-17308391	byo-15-0	byo-15-7	NOTEST	0	0.0252056	1.79769e+308	1.79769e+308	0.194774	1	no
Glyma01g13930	Glyma01g13930	Glyma01g13930	Gm01:17320003-17321677	byo-15-0	byo-15-7	NOTEST	0.364196	0.401416	0.140382	-0.15604	0.876001	1	no
Glyma01g13945	Glyma01g13945	Glyma01g13945	Gm01:17420498-17470577	byo-15-0	byo-15-7	NOTEST	0.19735	0.36437	0.884649	-1.01785	0.308749	1	no
Glyma01g13960	Glyma01g13960	Glyma01g13960	Gm01:17481711-17482061	byo-15-0	byo-15-7	NOTEST	0	0	0	0	1	1	no
Glyma01g14160	Glyma01g14160	Glyma01g14160	Gm01:17627819-17629241	byo-15-0	byo-15-7	NOTEST	0	0	0	0	1	1	no
Glyma01g14266	Glyma01g14266	Glyma01g14266	Gm01:17633685-17639586	byo-15-0	byo-15-7	NOTEST	0	0	0	0	1	1	no
Glyma01g14373	Glyma01g14373	Glyma01g14373	Gm01:18006948-18034570	byo-15-0	byo-15-7	OK	4.28399	6.59434	0.622272	-1.30013	0.193557	0.613848	no
Glyma01g14480	Glyma01g14480	Glyma01g14480	Gm01:18042133-18046082	byo-15-0	byo-15-7	OK	26.9505	29.5851	0.134558	-0.284596	0.775954	0.956355	no
Glyma01g14500	Glyma01g14500	Glyma01g14500	Gm01:18130228-18132625	byo-15-0	byo-15-7	NOTEST	0	0	0	0	1	1	no
Glyma01g14700	Glyma01g14700	Glyma01g14700	Gm01:18300892-18301399	byo-15-0	byo-15-7	OK	6.52533	9.25649	0.504415	-0.819235	0.412653	0.813812	no
Glyma01g14733	Glyma01g14733	Glyma01g14733	Gm01:18318922-18323085	byo-15-0	byo-15-7	OK	0.944653	1.06229	0.169316	-0.249313	0.803119	0.962652	no
Glyma01g14766	Glyma01g14766	Glyma01g14766	Gm01:18346082-18347761	byo-15-0	byo-15-7	NOTEST	0.178707	0.234845	0.394115	-0.39378	0.693744	1	no
Glyma01g14800	Glyma01g14800	Glyma01g14800	Gm01:18356149-18373966	byo-15-0	byo-15-7	OK	4.9199	8.42661	0.776326	-1.54142	0.123215	0.498853	no
Glyma01g14905	Glyma01g14905	Glyma01g14905	Gm01:18507857-18508875	byo-15-0	byo-15-7	NOTEST	0	0	0	0	1	1	no
Glyma01g15010	Glyma01g15010	Glyma01g15010	Gm01:18517441-18518370	byo-15-0	byo-15-7	NOTEST	0	0	0	0	1	1	no
Glyma01g15134	Glyma01g15134	Glyma01g15134	Gm01:18526281-18533321	byo-15-0	byo-15-7	OK	1.33102	0.874928	-0.605301	0.892409	0.372174	0.789815	no
Glyma01g15258	Glyma01g15258	Glyma01g15258	Gm01:18637238-18640215	byo-15-0	byo-15-7	NOTEST	0	0.0245291	1.79769e+308	1.79769e+308	0.194774	1	no
Glyma01g15382	Glyma01g15382	Glyma01g15382	Gm01:18694961-18695204	byo-15-0	byo-15-7	NOTEST	0	0	0	0	1	1	no
Glyma01g15506	Glyma01g15506	Glyma01g15506	Gm01:18952413-18962622	byo-15-0	byo-15-7	OK	31.2241	16.0123	-0.963475	1.67987	0.0929835	0.42965	no
Glyma01g15630	Glyma01g15630	Glyma01g15630	Gm01:19254139-19255483	byo-15-0	byo-15-7	NOTEST	0.236562	0.257143	0.120355	-0.111015	0.911604	1	no
Glyma01g15687	Glyma01g15687	Glyma01g15687	Gm01:19474756-19475786	byo-15-0	byo-15-7	NOTEST	0	0	0	0	1	1	no
Glyma01g15744	Glyma01g15744	Glyma01g15744	Gm01:19561924-19565934	byo-15-0	byo-15-7	NOTEST	0	0	0	0	1	1	no
Glyma01g15802	Glyma01g15802	Glyma01g15802	Gm01:19569955-19570642	byo-15-0	byo-15-7	NOTEST	0	0	0	0	1	1	no
Glyma01g15860	Glyma01g15860	Glyma01g15860	Gm01:19642510-19643505	byo-15-0	byo-15-7	NOTEST	0	0	0	0	1	1	no
Glyma01g15883	Glyma01g15883	Glyma01g15883	Gm01:19661251-19662687	byo-15-0	byo-15-7	NOTEST	0	0	0	0	1	1	no
Glyma01g15906	Glyma01g15906	Glyma01g15906	Gm01:19730841-19731653	byo-15-0	byo-15-7	NOTEST	0	0	0	0	1	1	no
Glyma01g15930	Glyma01g15930	Glyma01g15930	Gm01:19793857-19799930	byo-15-0	byo-15-7	OK	38.6834	23.1649	-0.739774	1.46456	0.143041	0.536657	no
Glyma01g16140	Glyma01g16140	Glyma01g16140	Gm01:20041371-20043743	byo-15-0	byo-15-7	OK	0	3.23094	1.79769e+308	1.79769e+308	0.000452774	0.0129313	yes
Glyma01g16250	Glyma01g16250	Glyma01g16250	Gm01:20048200-20050535	byo-15-0	byo-15-7	NOTEST	0	0	0	0	1	1	no
Glyma01g16360	Glyma01g16360	Glyma01g16360	Gm01:20233418-20235447	byo-15-0	byo-15-7	OK	0.788889	0.218047	-1.85518	1.77608	0.0757193	0.381174	no
Glyma01g16370	Glyma01g16370	Glyma01g16370	Gm01:20243646-20255339	byo-15-0	byo-15-7	OK	4.80415	7.42733	0.628563	-1.2702	0.204015	0.627251	no
Glyma01g16375	Glyma01g16375	Glyma01g16375	Gm01:20243646-20255339	byo-15-0	byo-15-7	NOTEST	0.450532	0.00320908	-7.13333	0.147094	0.883058	1	no
Glyma01g16380	Glyma01g16380	Glyma01g16380	Gm01:20340974-20356558	byo-15-0	byo-15-7	OK	33.9201	22.6567	-0.582203	1.17151	0.241394	0.675591	no
Glyma01g16526	Glyma01g16526	Glyma01g16526	Gm01:20473820-20507463	byo-15-0	byo-15-7	OK	4.53929	4.75335	0.0664803	-0.114945	0.908488	0.98351	no
Glyma01g16673	Glyma01g16673	Glyma01g16673	Gm01:20473820-20507463	byo-15-0	byo-15-7	NOTEST	0.137491	0.302261	1.13646	-0.53245	0.594414	1	no
Glyma01g16820	Glyma01g16820	Glyma01g16820	Gm01:20713503-20720624	byo-15-0	byo-15-7	OK	6.19887	7.33237	0.242275	-0.507144	0.612054	0.909389	no
Glyma01g17030	Glyma01g17030	Glyma01g17030	Gm01:21011809-21014457	byo-15-0	byo-15-7	NOTEST	0.371157	0.23059	-0.686704	0.629559	0.528983	1	no
Glyma01g17230	Glyma01g17230	Glyma01g17230	Gm01:21161585-21162372	byo-15-0	byo-15-7	OK	11.2522	11.462	0.0266579	-0.0513028	0.959084	0.992443	no
Glyma01g17240	Glyma01g17240	Glyma01g17240	Gm01:21232889-21235373	byo-15-0	byo-15-7	OK	1.78032	0.92097	-0.95091	1.27201	0.203369	0.626379	no
Glyma01g17271	Glyma01g17271	Glyma01g17271	Gm01:21300956-21302664	byo-15-0	byo-15-7	NOTEST	0	0	0	0	1	1	no
Glyma01g17300	Glyma01g17300	Glyma01g17300	Gm01:21447376-21448520	byo-15-0	byo-15-7	OK	39.0166	22.8426	-0.772363	1.60541	0.108403	0.467086	no
Glyma01g17330	Glyma01g17330	Glyma01g17330	Gm01:21487778-21490647	byo-15-0	byo-15-7	NOTEST	0	0	0	0	1	1	no
Glyma01g17350	Glyma01g17350	Glyma01g17350	Gm01:21601999-21604652	byo-15-0	byo-15-7	OK	3.18638	3.20634	0.00900731	-0.0177887	0.985807	0.997067	no
Glyma01g17426	Glyma01g17426	Glyma01g17426	Gm01:21677182-21677611	byo-15-0	byo-15-7	NOTEST	0	0	0	0	1	1	no
Glyma01g17503	Glyma01g17503	Glyma01g17503	Gm01:21677719-21680521	byo-15-0	byo-15-7	NOTEST	0	0	0	0	1	1	no
Glyma01g17580	Glyma01g17580	Glyma01g17580	Gm01:21886080-21888825	byo-15-0	byo-15-7	NOTEST	0.0410738	0	-1.79769e+308	-1.79769e+308	0.172791	1	no
Glyma01g17590	Glyma01g17590	Glyma01g17590	Gm01:21937384-21937864	byo-15-0	byo-15-7	OK	0	0.470984	1.79769e+308	1.79769e+308	0.0680698	0.359319	no
Glyma01g17820	Glyma01g17820	Glyma01g17820	Gm01:22078170-22079110	byo-15-0	byo-15-7	OK	25.8008	29.5864	0.197518	-0.415357	0.677881	0.93233	no
Glyma01g17850	Glyma01g17850	Glyma01g17850	Gm01:22130113-22137111	byo-15-0	byo-15-7	OK	65.0209	55.2509	-0.234905	0.401532	0.688028	0.935812	no
Glyma01g17870	Glyma01g17870	Glyma01g17870	Gm01:22202473-22210341	byo-15-0	byo-15-7	OK	12.163	12.9849	0.0943364	-0.181602	0.855895	0.974203	no
Glyma01g17880	Glyma01g17880	Glyma01g17880	Gm01:22222121-22222938	byo-15-0	byo-15-7	NOTEST	0	0	0	0	1	1	no
Glyma01g18040	Glyma01g18040	Glyma01g18040	Gm01:22484144-22487576	byo-15-0	byo-15-7	OK	8.73709	8.84043	0.0169645	-0.0357245	0.971502	0.994656	no
Glyma01g18200	Glyma01g18200	Glyma01g18200	Gm01:22687069-22688346	byo-15-0	byo-15-7	OK	0	1.27298	1.79769e+308	1.79769e+308	0.194774	0.614215	no
Glyma01g18360	Glyma01g18360	Glyma01g18360	Gm01:22689358-22689601	byo-15-0	byo-15-7	OK	0	2.66866	1.79769e+308	1.79769e+308	0.0680698	0.359319	no
Glyma01g18520	Glyma01g18520	Glyma01g18520	Gm01:22790155-22793135	byo-15-0	byo-15-7	NOTEST	0	0	0	0	1	1	no
Glyma01g18606	Glyma01g18606	Glyma01g18606	Gm01:23174174-23175344	byo-15-0	byo-15-7	NOTEST	0	0.0305639	1.79769e+308	1.79769e+308	0.194774	1	no
Glyma01g18693	Glyma01g18693	Glyma01g18693	Gm01:23245420-23247113	byo-15-0	byo-15-7	NOTEST	0	0	0	0	1	1	no
Glyma01g18780	Glyma01g18780	Glyma01g18780	Gm01:23303293-23306986	byo-15-0	byo-15-7	OK	22.3471	30.0904	0.429218	-0.898923	0.368694	0.787549	no
Glyma01g18885	Glyma01g18885	Glyma01g18885	Gm01:23422050-23424265	byo-15-0	byo-15-7	NOTEST	0	0	0	0	1	1	no
Glyma01g18990	Glyma01g18990	Glyma01g18990	Gm01:23424891-23425203	byo-15-0	byo-15-7	NOTEST	0	0	0	0	1	1	no
Glyma01g19200	Glyma01g19200	Glyma01g19200	Gm01:23586981-23590259	byo-15-0	byo-15-7	OK	6.11551	2.75395	-1.15097	1.82467	0.0680506	0.359319	no
Glyma01g19420	Glyma01g19420	Glyma01g19420	Gm01:23910735-23912214	byo-15-0	byo-15-7	OK	22.6139	9.41431	-1.26428	2.64433	0.00818532	0.0993676	no
Glyma01g19820	Glyma01g19820	Glyma01g19820	Gm01:24220923-24227067	byo-15-0	byo-15-7	OK	1.2894	1.08231	-0.25259	0.370214	0.711223	0.941707	no
Glyma01g20030	Glyma01g20030	Glyma01g20030	Gm01:24388541-24405141	byo-15-0	byo-15-7	OK	12.0055	8.32345	-0.528448	0.836519	0.402863	0.807546	no
Glyma01g20130	Glyma01g20130	Glyma01g20130	Gm01:24561667-24562473	byo-15-0	byo-15-7	NOTEST	0	0	0	0	1	1	no
Glyma01g20230	Glyma01g20230	Glyma01g20230	Gm01:24590327-24594299	byo-15-0	byo-15-7	OK	0.868043	1.68053	0.953075	-1.19713	0.231256	0.662784	no
Glyma01g20306	Glyma01g20306	Glyma01g20306	Gm01:24680832-24681420	byo-15-0	byo-15-7	NOTEST	0	0	0	0	1	1	no
Glyma01g20383	Glyma01g20383	Glyma01g20383	Gm01:24850234-24853077	byo-15-0	byo-15-7	OK	6.89692	7.53152	0.126989	-0.264142	0.791671	0.959127	no
Glyma01g20460	Glyma01g20460	Glyma01g20460	Gm01:24945683-24950931	byo-15-0	byo-15-7	OK	13.4505	27.9579	1.05559	-2.1222	0.0338212	0.239956	no
Glyma01g20565	Glyma01g20565	Glyma01g20565	Gm01:25139086-25141476	byo-15-0	byo-15-7	NOTEST	0	0	0	0	1	1	no
Glyma01g20670	Glyma01g20670	Glyma01g20670	Gm01:25147643-25157143	byo-15-0	byo-15-7	OK	19.6372	20.4994	0.06199	-0.130317	0.896315	0.982206	no
Glyma01g20700	Glyma01g20700	Glyma01g20700	Gm01:25222324-25227920	byo-15-0	byo-15-7	OK	19.0256	19.7369	0.0529493	-0.109064	0.913152	0.984362	no
Glyma01g20710	Glyma01g20710	Glyma01g20710	Gm01:25241778-25246814	byo-15-0	byo-15-7	NOTEST	0	0.149649	1.79769e+308	1.79769e+308	0.0208184	1	no
Glyma01g20720	Glyma01g20720	Glyma01g20720	Gm01:25343080-25358309	byo-15-0	byo-15-7	OK	2.36483	0.380271	-2.63664	3.83766	0.000124215	0.00486565	yes
Glyma01g20740	Glyma01g20740	Glyma01g20740	Gm01:25402501-25405946	byo-15-0	byo-15-7	OK	0.414892	2.4585	2.56697	-3.38018	0.000724387	0.0183918	yes
Glyma01g20751	Glyma01g20751	Glyma01g20751	Gm01:25409531-25409921	byo-15-0	byo-15-7	NOTEST	0	0	0	0	1	1	no
Glyma01g20760	Glyma01g20760	Glyma01g20760	Gm01:25500530-25509163	byo-15-0	byo-15-7	OK	18.8672	23.6573	0.326402	-0.658865	0.509983	0.865435	no
Glyma01g20775	Glyma01g20775	Glyma01g20775	Gm01:25559739-25563228	byo-15-0	byo-15-7	OK	13.4964	19.8562	0.55701	-1.15648	0.247486	0.682441	no
Glyma01g20790	Glyma01g20790	Glyma01g20790	Gm01:25566713-25569152	byo-15-0	byo-15-7	OK	0.221697	0.904227	2.0281	-1.87701	0.0605167	0.338243	no
Glyma01g20800	Glyma01g20800	Glyma01g20800	Gm01:25569808-25571509	byo-15-0	byo-15-7	NOTEST	0	0.12952	1.79769e+308	1.79769e+308	0.111832	1	no
Glyma01g20811	Glyma01g20811	Glyma01g20811	Gm01:25640214-25651295	byo-15-0	byo-15-7	OK	4.82814	4.61237	-0.06596	0.139394	0.889139	0.981199	no
Glyma01g20820	Glyma01g20820	Glyma01g20820	Gm01:25640214-25651295	byo-15-0	byo-15-7	LOWDATA	0	0	-0.06596	0	1	1	no
Glyma01g20860	Glyma01g20860	Glyma01g20860	Gm01:25711548-25714121	byo-15-0	byo-15-7	OK	38.3721	23.4024	-0.713399	1.43535	0.151188	0.550744	no
Glyma01g20870	Glyma01g20870	Glyma01g20870	Gm01:25714752-25716813	byo-15-0	byo-15-7	NOTEST	0.191159	0.185078	-0.0466403	0.042102	0.966417	1	no
Glyma01g20885	Glyma01g20885	Glyma01g20885	Gm01:25783765-25787946	byo-15-0	byo-15-7	NOTEST	0	0	0	0	1	1	no
Glyma01g20900	Glyma01g20900	Glyma01g20900	Gm01:25807514-25813526	byo-15-0	byo-15-7	NOTEST	0	0	0	0	1	1	no
Glyma01g20910	Glyma01g20910	Glyma01g20910	Gm01:25867401-25867807	byo-15-0	byo-15-7	NOTEST	0	0	0	0	1	1	no
Glyma01g20920	Glyma01g20920	Glyma01g20920	Gm01:25867821-25870459	byo-15-0	byo-15-7	OK	0.721782	1.58247	1.13254	-1.25292	0.210236	0.635478	no
Glyma01g20935	Glyma01g20935	Glyma01g20935	Gm01:25874290-25875066	byo-15-0	byo-15-7	NOTEST	0.21554	0	-1.79769e+308	-1.79769e+308	0.124059	1	no
Glyma01g20950	Glyma01g20950	Glyma01g20950	Gm01:26043470-26048530	byo-15-0	byo-15-7	OK	2.03498	0.843544	-1.27048	2.00725	0.0447227	0.284038	no
Glyma01g20970	Glyma01g20970	Glyma01g20970	Gm01:26111521-26112660	byo-15-0	byo-15-7	NOTEST	0	0	0	0	1	1	no
Glyma01g20980	Glyma01g20980	Glyma01g20980	Gm01:26203747-26206343	byo-15-0	byo-15-7	NOTEST	0	0	0	0	1	1	no
Glyma01g20986	Glyma01g20986	Glyma01g20986	Gm01:26214735-26217244	byo-15-0	byo-15-7	NOTEST	0	0	0	0	1	1	no
Glyma01g20993	Glyma01g20993	Glyma01g20993	Gm01:26218166-26218983	byo-15-0	byo-15-7	NOTEST	0	0	0	0	1	1	no
Glyma01g21000	Glyma01g21000	Glyma01g21000	Gm01:26227617-26228265	byo-15-0	byo-15-7	NOTEST	0	0	0	0	1	1	no
Glyma01g21120	Glyma01g21120	Glyma01g21120	Gm01:26230555-26237293	byo-15-0	byo-15-7	NOTEST	0	0	0	0	1	1	no
Glyma01g21241	Glyma01g21241	Glyma01g21241	Gm01:26358875-26362351	byo-15-0	byo-15-7	NOTEST	0	0.0713637	1.79769e+308	1.79769e+308	0.194774	1	no
Glyma01g21360	Glyma01g21360	Glyma01g21360	Gm01:26380864-26392487	byo-15-0	byo-15-7	OK	2.20568	0.888893	-1.31114	1.97645	0.0481033	0.296259	no
Glyma01g21480	Glyma01g21480	Glyma01g21480	Gm01:26542098-26544485	byo-15-0	byo-15-7	OK	1.22825	0.942256	-0.382415	0.602244	0.547012	0.88142	no
Glyma01g21500	Glyma01g21500	Glyma01g21500	Gm01:26596018-26599902	byo-15-0	byo-15-7	OK	38.0071	36.2954	-0.0664813	0.139619	0.888961	0.981174	no
Glyma01g21510	Glyma01g21510	Glyma01g21510	Gm01:26672645-26677024	byo-15-0	byo-15-7	OK	1.91894	1.46607	-0.388355	0.432521	0.665363	0.927903	no
Glyma01g21521	Glyma01g21521	Glyma01g21521	Gm01:26725662-26726466	byo-15-0	byo-15-7	NOTEST	0	0	0	0	1	1	no
Glyma01g21530	Glyma01g21530	Glyma01g21530	Gm01:26737266-26739888	byo-15-0	byo-15-7	NOTEST	0	0.0531355	1.79769e+308	1.79769e+308	0.229543	1	no
Glyma01g21540	Glyma01g21540	Glyma01g21540	Gm01:26740703-26749646	byo-15-0	byo-15-7	OK	0.35526	0.484913	0.448851	-0.378645	0.704952	0.940321	no
Glyma01g21570	Glyma01g21570	Glyma01g21570	Gm01:26771286-26773122	byo-15-0	byo-15-7	NOTEST	0	0	0	0	1	1	no
Glyma01g21575	Glyma01g21575	Glyma01g21575	Gm01:26798193-26799005	byo-15-0	byo-15-7	NOTEST	0	0	0	0	1	1	no
Glyma01g21580	Glyma01g21580	Glyma01g21580	Gm01:26814403-26817180	byo-15-0	byo-15-7	NOTEST	0.137983	0.140478	0.025853	-0.0225475	0.982011	1	no
Glyma01g21590	Glyma01g21590	Glyma01g21590	Gm01:26883578-26885952	byo-15-0	byo-15-7	NOTEST	0	0	0	0	1	1	no
Glyma01g21620	Glyma01g21620	Glyma01g21620	Gm01:26918441-26921225	byo-15-0	byo-15-7	NOTEST	0.149425	0.0564101	-1.4054	0.991822	0.321284	1	no
Glyma01g21630	Glyma01g21630	Glyma01g21630	Gm01:26936772-26938129	byo-15-0	byo-15-7	NOTEST	0	0	0	0	1	1	no
Glyma01g21660	Glyma01g21660	Glyma01g21660	Gm01:27033743-27042354	byo-15-0	byo-15-7	OK	0.579225	3.8892	2.74728	-4.04035	5.33712e-05	0.00253815	yes
Glyma01g21680	Glyma01g21680	Glyma01g21680	Gm01:27082459-27084583	byo-15-0	byo-15-7	OK	3.31199	3.82471	0.207652	-0.359083	0.719533	0.94413	no
Glyma01g21707	Glyma01g21707	Glyma01g21707	Gm01:27099239-27134127	byo-15-0	byo-15-7	OK	3.1049	3.419	0.139028	-0.246216	0.805515	0.963323	no
Glyma01g21734	Glyma01g21734	Glyma01g21734	Gm01:27099239-27134127	byo-15-0	byo-15-7	NOTEST	0.155125	0.44864	1.53213	-0.87958	0.379087	1	no
Glyma01g21762	Glyma01g21762	Glyma01g21762	Gm01:27142763-27149757	byo-15-0	byo-15-7	NOTEST	0	0	0	0	1	1	no
Glyma01g21790	Glyma01g21790	Glyma01g21790	Gm01:27193609-27195324	byo-15-0	byo-15-7	NOTEST	0	0	0	0	1	1	no
Glyma01g21831	Glyma01g21831	Glyma01g21831	Gm01:27209475-27244035	byo-15-0	byo-15-7	NOTEST	0.45871	0.463398	0.0146701	-0.0145201	0.988415	1	no
Glyma01g21870	Glyma01g21870	Glyma01g21870	Gm01:27283470-27283944	byo-15-0	byo-15-7	NOTEST	0	0	0	0	1	1	no
Glyma01g21900	Glyma01g21900	Glyma01g21900	Gm01:27377288-27379936	byo-15-0	byo-15-7	OK	1.24684	2.51375	1.01156	-1.58736	0.112432	0.47473	no
Glyma01g22120	Glyma01g22120	Glyma01g22120	Gm01:27653934-27655968	byo-15-0	byo-15-7	NOTEST	0	0	0	0	1	1	no
Glyma01g22131	Glyma01g22131	Glyma01g22131	Gm01:27671430-27681519	byo-15-0	byo-15-7	NOTEST	0	0	0	0	1	1	no
Glyma01g22140	Glyma01g22140	Glyma01g22140	Gm01:27681952-27683220	byo-15-0	byo-15-7	NOTEST	0	0	0	0	1	1	no
Glyma01g22160	Glyma01g22160	Glyma01g22160	Gm01:27743827-27745117	byo-15-0	byo-15-7	OK	5.04414	4.2289	-0.254328	0.443067	0.657717	0.92545	no
Glyma01g22170	Glyma01g22170	Glyma01g22170	Gm01:27746481-27751766	byo-15-0	byo-15-7	OK	15.9035	19.8021	0.316306	-0.668862	0.503583	0.861995	no
Glyma01g22180	Glyma01g22180	Glyma01g22180	Gm01:27781683-27784987	byo-15-0	byo-15-7	OK	11.3853	11.2026	-0.0233308	0.0453762	0.963807	0.993153	no
Glyma01g22195	Glyma01g22195	Glyma01g22195	Gm01:27825362-27840530	byo-15-0	byo-15-7	NOTEST	0.0405669	0.0223255	-0.861615	0.214927	0.829824	1	no
Glyma01g22210	Glyma01g22210	Glyma01g22210	Gm01:27825362-27840530	byo-15-0	byo-15-7	OK	1.05616	2.02397	0.938361	-1.17485	0.240056	0.673954	no
Glyma01g22260	Glyma01g22260	Glyma01g22260	Gm01:27963645-27965402	byo-15-0	byo-15-7	OK	3.49544	6.16878	0.819513	-1.62426	0.104319	0.457946	no
Glyma01g22333	Glyma01g22333	Glyma01g22333	Gm01:28079064-28083033	byo-15-0	byo-15-7	NOTEST	0.142253	0	-1.79769e+308	-1.79769e+308	0.124059	1	no
Glyma01g22406	Glyma01g22406	Glyma01g22406	Gm01:28104831-28117466	byo-15-0	byo-15-7	OK	5.71236	6.10744	0.0964805	-0.203335	0.838873	0.969756	no
Glyma01g22480	Glyma01g22480	Glyma01g22480	Gm01:28151173-28153211	byo-15-0	byo-15-7	OK	4.30521	3.17589	-0.43892	0.85334	0.393471	0.8025	no
Glyma01g22490	Glyma01g22490	Glyma01g22490	Gm01:28188535-28194784	byo-15-0	byo-15-7	OK	20.9512	16.2048	-0.370613	0.765691	0.44386	0.831573	no
Glyma01g22501	Glyma01g22501	Glyma01g22501	Gm01:28205872-28206502	byo-15-0	byo-15-7	NOTEST	0	0	0	0	1	1	no
Glyma01g22510	Glyma01g22510	Glyma01g22510	Gm01:28236453-28241841	byo-15-0	byo-15-7	OK	1.47068	2.44903	0.73573	-1.17975	0.238101	0.672037	no
Glyma01g22530	Glyma01g22530	Glyma01g22530	Gm01:28336960-28340913	byo-15-0	byo-15-7	NOTEST	0.0393363	0.0423343	0.105968	-0.0400939	0.968018	1	no
Glyma01g22542	Glyma01g22542	Glyma01g22542	Gm01:28390587-28392968	byo-15-0	byo-15-7	OK	1.09965	0.541902	-1.02094	1.02941	0.303285	0.734245	no
Glyma01g22554	Glyma01g22554	Glyma01g22554	Gm01:28393068-28396339	byo-15-0	byo-15-7	OK	0.576036	0.668314	0.214369	-0.266971	0.789492	0.958504	no
Glyma01g22567	Glyma01g22567	Glyma01g22567	Gm01:28416197-28418758	byo-15-0	byo-15-7	NOTEST	0	0	0	0	1	1	no
Glyma01g22580	Glyma01g22580	Glyma01g22580	Gm01:28513351-28526497	byo-15-0	byo-15-7	OK	1.61733	2.18739	0.435601	-0.637576	0.52375	0.872594	no
Glyma01g22600	Glyma01g22600	Glyma01g22600	Gm01:28536103-28539838	byo-15-0	byo-15-7	OK	16.2716	13.7576	-0.24213	0.480845	0.630627	0.917794	no
Glyma01g22610	Glyma01g22610	Glyma01g22610	Gm01:28541141-28542499	byo-15-0	byo-15-7	NOTEST	0.174475	0.244819	0.488695	-0.412257	0.680151	1	no
Glyma01g22620	Glyma01g22620	Glyma01g22620	Gm01:28543689-28553173	byo-15-0	byo-15-7	OK	99.2138	66.9074	-0.568375	0.907165	0.36432	0.783737	no
Glyma01g22630	Glyma01g22630	Glyma01g22630	Gm01:28591482-28597660	byo-15-0	byo-15-7	OK	2.84527	3.59253	0.336432	-0.618001	0.536575	0.877761	no
Glyma01g22641	Glyma01g22641	Glyma01g22641	Gm01:28636476-28637827	byo-15-0	byo-15-7	OK	0.706835	1.44603	1.03265	-1.30595	0.191568	0.611656	no
Glyma01g22650	Glyma01g22650	Glyma01g22650	Gm01:28639438-28642822	byo-15-0	byo-15-7	NOTEST	0	0	0	0	1	1	no
Glyma01g22670	Glyma01g22670	Glyma01g22670	Gm01:28699702-28704423	byo-15-0	byo-15-7	NOTEST	0.0560793	0	-1.79769e+308	-1.79769e+308	0.124059	1	no
Glyma01g22680	Glyma01g22680	Glyma01g22680	Gm01:28708173-28714632	byo-15-0	byo-15-7	OK	16.5889	19.9599	0.266893	-0.513664	0.607487	0.907663	no
Glyma01g22710	Glyma01g22710	Glyma01g22710	Gm01:28768432-28773021	byo-15-0	byo-15-7	OK	0.848928	1.15249	0.441043	-0.72789	0.466681	0.841769	no
Glyma01g22720	Glyma01g22720	Glyma01g22720	Gm01:28773705-28774862	byo-15-0	byo-15-7	NOTEST	0	0	0	0	1	1	no
Glyma01g22730	Glyma01g22730	Glyma01g22730	Gm01:28777549-28780388	byo-15-0	byo-15-7	NOTEST	0.0447313	0	-1.79769e+308	-1.79769e+308	0.216997	1	no
Glyma01g22751	Glyma01g22751	Glyma01g22751	Gm01:28847126-28848359	byo-15-0	byo-15-7	NOTEST	0.245927	0.0861175	-1.51385	1.06836	0.285359	1	no
Glyma01g22770	Glyma01g22770	Glyma01g22770	Gm01:28902721-28902950	byo-15-0	byo-15-7	NOTEST	0	0	0	0	1	1	no
Glyma01g22800	Glyma01g22800	Glyma01g22800	Gm01:28928281-28929701	byo-15-0	byo-15-7	NOTEST	0	0.370837	1.79769e+308	1.79769e+308	0.00902044	1	no
Glyma01g22830	Glyma01g22830	Glyma01g22830	Gm01:28986402-28988037	byo-15-0	byo-15-7	OK	0.878218	0.526944	-0.736929	0.811817	0.416896	0.815953	no
Glyma01g22840	Glyma01g22840	Glyma01g22840	Gm01:28991061-29005174	byo-15-0	byo-15-7	NOTEST	0.0416311	0.0350797	-0.247024	0.15083	0.88011	1	no
Glyma01g22850	Glyma01g22850	Glyma01g22850	Gm01:29076299-29082231	byo-15-0	byo-15-7	NOTEST	0.184186	0.1765	-0.0614934	0.0675093	0.946176	1	no
Glyma01g22861	Glyma01g22861	Glyma01g22861	Gm01:29092183-29093676	byo-15-0	byo-15-7	NOTEST	0	0	0	0	1	1	no
Glyma01g22871	Glyma01g22871	Glyma01g22871	Gm01:29147726-29148607	byo-15-0	byo-15-7	OK	13.4154	1.63791	-3.03397	4.11443	3.88129e-05	0.00196926	yes
Glyma01g22880	Glyma01g22880	Glyma01g22880	Gm01:29149880-29152191	byo-15-0	byo-15-7	OK	0.222823	1.39077	2.64192	-3.15481	0.001606	0.0330806	yes
Glyma01g22910	Glyma01g22910	Glyma01g22910	Gm01:29193663-29195557	byo-15-0	byo-15-7	NOTEST	0	0	0	0	1	1	no
Glyma01g22927	Glyma01g22927	Glyma01g22927	Gm01:29230774-29239997	byo-15-0	byo-15-7	NOTEST	0	0	0	0	1	1	no
Glyma01g22944	Glyma01g22944	Glyma01g22944	Gm01:29270621-29273823	byo-15-0	byo-15-7	NOTEST	0	0	0	0	1	1	no
Glyma01g22962	Glyma01g22962	Glyma01g22962	Gm01:29296975-29300243	byo-15-0	byo-15-7	NOTEST	0	0.0195088	1.79769e+308	1.79769e+308	0.194774	1	no
Glyma01g22980	Glyma01g22980	Glyma01g22980	Gm01:29388012-29389406	byo-15-0	byo-15-7	NOTEST	0	0	0	0	1	1	no
Glyma01g22990	Glyma01g22990	Glyma01g22990	Gm01:29393119-29399932	byo-15-0	byo-15-7	NOTEST	0.254255	0.105221	-1.27286	1.38514	0.16601	1	no
Glyma01g23015	Glyma01g23015	Glyma01g23015	Gm01:29421939-29425642	byo-15-0	byo-15-7	OK	4.14479	1.86307	-1.15362	1.06281	0.287867	0.720468	no
Glyma01g23040	Glyma01g23040	Glyma01g23040	Gm01:29470009-29471440	byo-15-0	byo-15-7	OK	4.16118	3.8895	-0.097408	0.175806	0.860446	0.974488	no
Glyma01g23056	Glyma01g23056	Glyma01g23056	Gm01:29471833-29483149	byo-15-0	byo-15-7	OK	3.37047	3.55574	0.0771994	-0.154978	0.876839	0.978067	no
Glyma01g23072	Glyma01g23072	Glyma01g23072	Gm01:29511789-29512084	byo-15-0	byo-15-7	NOTEST	0	0	0	0	1	1	no
Glyma01g23089	Glyma01g23089	Glyma01g23089	Gm01:29533330-29533964	byo-15-0	byo-15-7	NOTEST	0	0	0	0	1	1	no
Glyma01g23106	Glyma01g23106	Glyma01g23106	Gm01:29535512-29536834	byo-15-0	byo-15-7	NOTEST	0	0	0	0	1	1	no
Glyma01g23123	Glyma01g23123	Glyma01g23123	Gm01:29537254-29537802	byo-15-0	byo-15-7	NOTEST	0	0	0	0	1	1	no
Glyma01g23140	Glyma01g23140	Glyma01g23140	Gm01:29565892-29574413	byo-15-0	byo-15-7	OK	0.317298	0.586355	0.885938	-1.26008	0.207642	0.632233	no
Glyma01g23150	Glyma01g23150	Glyma01g23150	Gm01:29660957-29665158	byo-15-0	byo-15-7	OK	3.97502	5.07003	0.351032	-0.707547	0.479227	0.849235	no
Glyma01g23180	Glyma01g23180	Glyma01g23180	Gm01:29699064-29704324	byo-15-0	byo-15-7	OK	2.97653	2.77071	-0.103373	0.204028	0.838331	0.969502	no
Glyma01g23196	Glyma01g23196	Glyma01g23196	Gm01:29809758-29827788	byo-15-0	byo-15-7	OK	7.38797	2.2728	-1.70071	1.91023	0.0561037	0.323496	no
Glyma01g23213	Glyma01g23213	Glyma01g23213	Gm01:29809758-29827788	byo-15-0	byo-15-7	OK	4.13781	4.06632	-0.0251436	0.0428506	0.965821	0.993281	no
Glyma01g23230	Glyma01g23230	Glyma01g23230	Gm01:29843906-29847664	byo-15-0	byo-15-7	OK	3.22338	4.1313	0.358022	-0.678795	0.497267	0.858344	no
Glyma01g23250	Glyma01g23250	Glyma01g23250	Gm01:29855703-29857266	byo-15-0	byo-15-7	NOTEST	0	0	0	0	1	1	no
Glyma01g23300	Glyma01g23300	Glyma01g23300	Gm01:29947728-29948872	byo-15-0	byo-15-7	NOTEST	0	0	0	0	1	1	no
Glyma01g23342	Glyma01g23342	Glyma01g23342	Gm01:29989093-29991297	byo-15-0	byo-15-7	NOTEST	0	0	0	0	1	1	no
Glyma01g23384	Glyma01g23384	Glyma01g23384	Gm01:30079377-30079787	byo-15-0	byo-15-7	NOTEST	0	0	0	0	1	1	no
Glyma01g23427	Glyma01g23427	Glyma01g23427	Gm01:30083471-30150322	byo-15-0	byo-15-7	OK	1.60941	2.71643	0.755178	-1.41324	0.157585	0.562394	no
Glyma01g23470	Glyma01g23470	Glyma01g23470	Gm01:30208373-30208835	byo-15-0	byo-15-7	NOTEST	0	0	0	0	1	1	no
Glyma01g23534	Glyma01g23534	Glyma01g23534	Gm01:30275109-30281645	byo-15-0	byo-15-7	NOTEST	0	0	0	0	1	1	no
Glyma01g23598	Glyma01g23598	Glyma01g23598	Gm01:30314496-30324821	byo-15-0	byo-15-7	OK	7.44333	9.64131	0.373282	-0.759047	0.447825	0.833179	no
Glyma01g23662	Glyma01g23662	Glyma01g23662	Gm01:30575165-30577235	byo-15-0	byo-15-7	NOTEST	0	0	0	0	1	1	no
Glyma01g23726	Glyma01g23726	Glyma01g23726	Gm01:30704826-30710568	byo-15-0	byo-15-7	OK	5.27479	6.41712	0.282813	-0.571074	0.56795	0.891328	no
Glyma01g23790	Glyma01g23790	Glyma01g23790	Gm01:30725259-30734274	byo-15-0	byo-15-7	NOTEST	0	0.00715356	1.79769e+308	1.79769e+308	0.271454	1	no
Glyma01g23820	Glyma01g23820	Glyma01g23820	Gm01:30803138-30810796	byo-15-0	byo-15-7	OK	4.4498	4.2158	-0.0779346	0.124337	0.901048	0.982627	no
Glyma01g23830	Glyma01g23830	Glyma01g23830	Gm01:30834278-30837915	byo-15-0	byo-15-7	OK	4.81462	3.4502	-0.480743	0.881127	0.378249	0.794295	no
Glyma01g23840	Glyma01g23840	Glyma01g23840	Gm01:30921784-30923363	byo-15-0	byo-15-7	NOTEST	0	0	0	0	1	1	no
Glyma01g23870	Glyma01g23870	Glyma01g23870	Gm01:31003666-31006666	byo-15-0	byo-15-7	OK	14.0945	8.22798	-0.77652	1.61775	0.105717	0.461002	no
Glyma01g24100	Glyma01g24100	Glyma01g24100	Gm01:31272679-31276347	byo-15-0	byo-15-7	OK	70.1557	46.5948	-0.590391	1.20921	0.226581	0.656776	no
Glyma01g24115	Glyma01g24115	Glyma01g24115	Gm01:31363012-31365202	byo-15-0	byo-15-7	NOTEST	0	0	0	0	1	1	no
Glyma01g24130	Glyma01g24130	Glyma01g24130	Gm01:31382751-31384508	byo-15-0	byo-15-7	NOTEST	0	0	0	0	1	1	no
Glyma01g24136	Glyma01g24136	Glyma01g24136	Gm01:31384592-31388267	byo-15-0	byo-15-7	NOTEST	0	0	0	0	1	1	no
Glyma01g24143	Glyma01g24143	Glyma01g24143	Gm01:31403714-31405886	byo-15-0	byo-15-7	NOTEST	0	0	0	0	1	1	no
Glyma01g24150	Glyma01g24150	Glyma01g24150	Gm01:31406290-31410211	byo-15-0	byo-15-7	OK	0.549092	0.545883	-0.00845682	0.00922978	0.992636	0.998723	no
Glyma01g24160	Glyma01g24160	Glyma01g24160	Gm01:31442860-31443621	byo-15-0	byo-15-7	NOTEST	0.150498	0.170918	0.183559	-0.106582	0.91512	1	no
Glyma01g24360	Glyma01g24360	Glyma01g24360	Gm01:31583729-31587255	byo-15-0	byo-15-7	OK	39.2147	8.27193	-2.2451	4.57708	4.71505e-06	0.000378934	yes
Glyma01g24383	Glyma01g24383	Glyma01g24383	Gm01:31655035-31655556	byo-15-0	byo-15-7	NOTEST	0	0	0	0	1	1	no
Glyma01g24406	Glyma01g24406	Glyma01g24406	Gm01:31704492-31706592	byo-15-0	byo-15-7	NOTEST	0	0.136177	1.79769e+308	1.79769e+308	0.194774	1	no
Glyma01g24430	Glyma01g24430	Glyma01g24430	Gm01:31720084-31726752	byo-15-0	byo-15-7	OK	1.70009	3.1151	0.873671	-1.40328	0.160532	0.566613	no
Glyma01g24455	Glyma01g24455	Glyma01g24455	Gm01:31734753-31736467	byo-15-0	byo-15-7	NOTEST	0.167353	0.263054	0.652462	-0.628491	0.529682	1	no
Glyma01g24480	Glyma01g24480	Glyma01g24480	Gm01:31792540-31792932	byo-15-0	byo-15-7	OK	4.68832	4.65806	-0.00934327	0.0121244	0.990326	0.997963	no
Glyma01g24495	Glyma01g24495	Glyma01g24495	Gm01:31795450-31795885	byo-15-0	byo-15-7	NOTEST	0.438033	0	-1.79769e+308	-1.79769e+308	0.124059	1	no
Glyma01g24510	Glyma01g24510	Glyma01g24510	Gm01:31818673-31828608	byo-15-0	byo-15-7	OK	1.51477	1.56637	0.0483275	-0.0828463	0.933974	0.988276	no
Glyma01g24515	Glyma01g24515	Glyma01g24515	Gm01:31889614-31891603	byo-15-0	byo-15-7	NOTEST	0	0	0	0	1	1	no
Glyma01g24520	Glyma01g24520	Glyma01g24520	Gm01:31911765-31920749	byo-15-0	byo-15-7	OK	3.64142	4.43579	0.284689	-0.445959	0.655627	0.924691	no
Glyma01g24530	Glyma01g24530	Glyma01g24530	Gm01:31964428-31977723	byo-15-0	byo-15-7	NOTEST	0.238008	0.0686237	-1.79423	1.42199	0.15503	1	no
Glyma01g24536	Glyma01g24536	Glyma01g24536	Gm01:31981604-31985794	byo-15-0	byo-15-7	NOTEST	0	0	0	0	1	1	no
Glyma01g24543	Glyma01g24543	Glyma01g24543	Gm01:32028704-32031074	byo-15-0	byo-15-7	NOTEST	0	0	0	0	1	1	no
Glyma01g24550	Glyma01g24550	Glyma01g24550	Gm01:32033425-32036205	byo-15-0	byo-15-7	OK	3.73712	3.57726	-0.0630741	0.0861996	0.931308	0.987708	no
Glyma01g24570	Glyma01g24570	Glyma01g24570	Gm01:32066869-32072424	byo-15-0	byo-15-7	OK	6.15614	8.45226	0.457312	-0.84308	0.399184	0.805255	no
Glyma01g24580	Glyma01g24580	Glyma01g24580	Gm01:32077414-32078744	byo-15-0	byo-15-7	NOTEST	0	0	0	0	1	1	no
Glyma01g24601	Glyma01g24601	Glyma01g24601	Gm01:32084232-32086938	byo-15-0	byo-15-7	OK	8.53198	5.14928	-0.72851	0.964315	0.334888	0.760325	no
Glyma01g24620	Glyma01g24620	Glyma01g24620	Gm01:32161499-32162094	byo-15-0	byo-15-7	NOTEST	0	0	0	0	1	1	no
Glyma01g24650	Glyma01g24650	Glyma01g24650	Gm01:32202535-32211787	byo-15-0	byo-15-7	OK	6.85409	14.5578	1.08676	-2.23454	0.0254476	0.202319	no
Glyma01g24670	Glyma01g24670	Glyma01g24670	Gm01:32220914-32223882	byo-15-0	byo-15-7	OK	0.244616	0.505682	1.04771	-1.32207	0.186145	0.604422	no
Glyma01g24680	Glyma01g24680	Glyma01g24680	Gm01:32231085-32231557	byo-15-0	byo-15-7	NOTEST	0	0	0	0	1	1	no
Glyma01g24710	Glyma01g24710	Glyma01g24710	Gm01:32287633-32289710	byo-15-0	byo-15-7	NOTEST	0.121847	0.138697	0.186865	-0.184329	0.853756	1	no
Glyma01g24715	Glyma01g24715	Glyma01g24715	Gm01:32301822-32302361	byo-15-0	byo-15-7	NOTEST	0	0	0	0	1	1	no
Glyma01g24720	Glyma01g24720	Glyma01g24720	Gm01:32308210-32311363	byo-15-0	byo-15-7	NOTEST	0	0	0	0	1	1	no
Glyma01g24735	Glyma01g24735	Glyma01g24735	Gm01:32401120-32402034	byo-15-0	byo-15-7	NOTEST	0	0	0	0	1	1	no
Glyma01g24750	Glyma01g24750	Glyma01g24750	Gm01:32402350-32403396	byo-15-0	byo-15-7	NOTEST	0	0	0	0	1	1	no
Glyma01g24771	Glyma01g24771	Glyma01g24771	Gm01:32417415-32418160	byo-15-0	byo-15-7	NOTEST	0	0	0	0	1	1	no
Glyma01g24790	Glyma01g24790	Glyma01g24790	Gm01:32422309-32422465	byo-15-0	byo-15-7	NOTEST	0	0	0	0	1	1	no
Glyma01g24801	Glyma01g24801	Glyma01g24801	Gm01:32490914-32491358	byo-15-0	byo-15-7	NOTEST	0	0	0	0	1	1	no
Glyma01g24811	Glyma01g24811	Glyma01g24811	Gm01:32561178-32561613	byo-15-0	byo-15-7	NOTEST	0	0	0	0	1	1	no
Glyma01g24820	Glyma01g24820	Glyma01g24820	Gm01:32606517-32608233	byo-15-0	byo-15-7	NOTEST	0	0	0	0	1	1	no
Glyma01g24835	Glyma01g24835	Glyma01g24835	Gm01:32612017-32613710	byo-15-0	byo-15-7	NOTEST	0	0	0	0	1	1	no
Glyma01g24850	Glyma01g24850	Glyma01g24850	Gm01:32687318-32692418	byo-15-0	byo-15-7	NOTEST	0	0	0	0	1	1	no
Glyma01g24870	Glyma01g24870	Glyma01g24870	Gm01:32782513-32787123	byo-15-0	byo-15-7	NOTEST	0.0383233	0	-1.79769e+308	-1.79769e+308	0.124059	1	no
Glyma01g24880	Glyma01g24880	Glyma01g24880	Gm01:32798562-32800071	byo-15-0	byo-15-7	OK	2.4044	5.43752	1.17727	-1.92734	0.053937	0.315447	no
Glyma01g24900	Glyma01g24900	Glyma01g24900	Gm01:32814004-32817943	byo-15-0	byo-15-7	OK	5.49575	4.88934	-0.168677	0.301918	0.762715	0.954495	no
Glyma01g24915	Glyma01g24915	Glyma01g24915	Gm01:32834808-32836555	byo-15-0	byo-15-7	NOTEST	0	0	0	0	1	1	no
Glyma01g24931	Glyma01g24931	Glyma01g24931	Gm01:32867175-32870537	byo-15-0	byo-15-7	OK	52.8963	47.5196	-0.154645	0.308642	0.757594	0.953942	no
Glyma01g24945	Glyma01g24945	Glyma01g24945	Gm01:32870727-32871773	byo-15-0	byo-15-7	OK	9.84311	10.773	0.130235	-0.2442	0.807076	0.963323	no
Glyma01g24960	Glyma01g24960	Glyma01g24960	Gm01:32900893-32902163	byo-15-0	byo-15-7	NOTEST	0	0	0	0	1	1	no
Glyma01g24975	Glyma01g24975	Glyma01g24975	Gm01:33011689-33012355	byo-15-0	byo-15-7	NOTEST	0	0	0	0	1	1	no
Glyma01g24990	Glyma01g24990	Glyma01g24990	Gm01:33023697-33026836	byo-15-0	byo-15-7	NOTEST	0	0	0	0	1	1	no
Glyma01g25000	Glyma01g25000	Glyma01g25000	Gm01:33038313-33043683	byo-15-0	byo-15-7	NOTEST	0	0.0945686	1.79769e+308	1.79769e+308	0.0998636	1	no
Glyma01g25010	Glyma01g25010	Glyma01g25010	Gm01:33122056-33128090	byo-15-0	byo-15-7	OK	1.0058	1.43996	0.517685	-0.714509	0.474913	0.846708	no
Glyma01g25040	Glyma01g25040	Glyma01g25040	Gm01:33159095-33163007	byo-15-0	byo-15-7	OK	5.12045	4.67687	-0.130727	0.2578	0.796561	0.961034	no
Glyma01g25116	Glyma01g25116	Glyma01g25116	Gm01:33175920-33176216	byo-15-0	byo-15-7	NOTEST	0	0	0	0	1	1	no
Glyma01g25193	Glyma01g25193	Glyma01g25193	Gm01:33176938-33177664	byo-15-0	byo-15-7	NOTEST	0	0	0	0	1	1	no
Glyma01g25270	Glyma01g25270	Glyma01g25270	Gm01:33300641-33305517	byo-15-0	byo-15-7	OK	4.84168	6.30924	0.381958	-0.802457	0.422289	0.819207	no
Glyma01g25690	Glyma01g25690	Glyma01g25690	Gm01:33714521-33724227	byo-15-0	byo-15-7	OK	3.44079	2.08926	-0.719749	1.30314	0.192527	0.612706	no
Glyma01g25710	Glyma01g25710	Glyma01g25710	Gm01:33743092-33750073	byo-15-0	byo-15-7	OK	1.09445	1.062	-0.0434286	0.0678388	0.945914	0.990703	no
Glyma01g25734	Glyma01g25734	Glyma01g25734	Gm01:33873561-33877219	byo-15-0	byo-15-7	NOTEST	0	0	0	0	1	1	no
Glyma01g25758	Glyma01g25758	Glyma01g25758	Gm01:33877681-33878910	byo-15-0	byo-15-7	NOTEST	0	0	0	0	1	1	no
Glyma01g25782	Glyma01g25782	Glyma01g25782	Gm01:33892028-33896774	byo-15-0	byo-15-7	NOTEST	0.112063	0.0933237	-0.263999	0.248405	0.803821	1	no
Glyma01g25806	Glyma01g25806	Glyma01g25806	Gm01:33911123-33912252	byo-15-0	byo-15-7	NOTEST	0	0	0	0	1	1	no
Glyma01g25830	Glyma01g25830	Glyma01g25830	Gm01:33967102-33969353	byo-15-0	byo-15-7	OK	23.9153	9.762	-1.29269	2.67609	0.00744875	0.0932277	no
Glyma01g25861	Glyma01g25861	Glyma01g25861	Gm01:33970039-33970770	byo-15-0	byo-15-7	NOTEST	0	0	0	0	1	1	no
Glyma01g25890	Glyma01g25890	Glyma01g25890	Gm01:34032831-34039400	byo-15-0	byo-15-7	OK	5.87979	2.08531	-1.4955	2.71994	0.00652947	0.0852201	no
Glyma01g25903	Glyma01g25903	Glyma01g25903	Gm01:34110636-34112307	byo-15-0	byo-15-7	NOTEST	0	0	0	0	1	1	no
Glyma01g25916	Glyma01g25916	Glyma01g25916	Gm01:34210140-34210872	byo-15-0	byo-15-7	NOTEST	0	0	0	0	1	1	no
Glyma01g25930	Glyma01g25930	Glyma01g25930	Gm01:34244964-34245805	byo-15-0	byo-15-7	NOTEST	0.43844	0	-1.79769e+308	-1.79769e+308	0.0315054	1	no
Glyma01g25940	Glyma01g25940	Glyma01g25940	Gm01:34287073-34295334	byo-15-0	byo-15-7	OK	31.7805	30.2655	-0.070469	0.13704	0.890999	0.981645	no
Glyma01g25960	Glyma01g25960	Glyma01g25960	Gm01:34329634-34332496	byo-15-0	byo-15-7	NOTEST	0.0650408	0.120766	0.892798	-0.433669	0.664528	1	no
Glyma01g25980	Glyma01g25980	Glyma01g25980	Gm01:34344570-34345856	byo-15-0	byo-15-7	NOTEST	0	0	0	0	1	1	no
Glyma01g26010	Glyma01g26010	Glyma01g26010	Gm01:34353206-34357427	byo-15-0	byo-15-7	NOTEST	0	0	0	0	1	1	no
Glyma01g26220	Glyma01g26220	Glyma01g26220	Gm01:34484074-34486309	byo-15-0	byo-15-7	OK	2.47629	4.9785	1.00753	-1.72203	0.0850632	0.409156	no
Glyma01g26230	Glyma01g26230	Glyma01g26230	Gm01:34508385-34510490	byo-15-0	byo-15-7	OK	5.69595	21.2049	1.89639	-3.72926	0.000192044	0.00683405	yes
Glyma01g26300	Glyma01g26300	Glyma01g26300	Gm01:34545482-34547230	byo-15-0	byo-15-7	OK	5.33709	1.84656	-1.53121	2.33149	0.0197277	0.172254	no
Glyma01g26310	Glyma01g26310	Glyma01g26310	Gm01:34591834-34592752	byo-15-0	byo-15-7	NOTEST	0	0	0	0	1	1	no
Glyma01g26325	Glyma01g26325	Glyma01g26325	Gm01:34678298-34679472	byo-15-0	byo-15-7	NOTEST	0	0	0	0	1	1	no
Glyma01g26340	Glyma01g26340	Glyma01g26340	Gm01:34729733-34732217	byo-15-0	byo-15-7	NOTEST	0.10725	0.0992871	-0.111295	0.100466	0.919975	1	no
Glyma01g26350	Glyma01g26350	Glyma01g26350	Gm01:34828578-34838846	byo-15-0	byo-15-7	OK	3.82439	3.83502	0.00400539	-0.0080864	0.993548	0.998723	no
Glyma01g26360	Glyma01g26360	Glyma01g26360	Gm01:34923320-34923989	byo-15-0	byo-15-7	OK	3.98445	33.1759	3.05768	-5.05092	4.39685e-07	5.56132e-05	yes
Glyma01g26570	Glyma01g26570	Glyma01g26570	Gm01:35047812-35050350	byo-15-0	byo-15-7	NOTEST	0.128602	0	-1.79769e+308	-1.79769e+308	0.0512004	1	no
Glyma01g26580	Glyma01g26580	Glyma01g26580	Gm01:35128362-35132942	byo-15-0	byo-15-7	NOTEST	0.0829553	0	-1.79769e+308	-1.79769e+308	0.124059	1	no
Glyma01g26590	Glyma01g26590	Glyma01g26590	Gm01:35185581-35190582	byo-15-0	byo-15-7	NOTEST	0.036836	0.0521742	0.502218	-0.423664	0.671811	1	no
Glyma01g26600	Glyma01g26600	Glyma01g26600	Gm01:35191726-35193878	byo-15-0	byo-15-7	OK	5.05688	6.54958	0.373155	-0.659372	0.509657	0.865171	no
Glyma01g26606	Glyma01g26606	Glyma01g26606	Gm01:35221753-35222332	byo-15-0	byo-15-7	NOTEST	0	0	0	0	1	1	no
Glyma01g26613	Glyma01g26613	Glyma01g26613	Gm01:35260947-35261763	byo-15-0	byo-15-7	NOTEST	0	0	0	0	1	1	no
Glyma01g26620	Glyma01g26620	Glyma01g26620	Gm01:35271480-35272153	byo-15-0	byo-15-7	NOTEST	0	0	0	0	1	1	no
Glyma01g26650	Glyma01g26650	Glyma01g26650	Gm01:35317654-35328670	byo-15-0	byo-15-7	OK	1.83676	1.46892	-0.322413	0.491887	0.622799	0.914298	no
Glyma01g26670	Glyma01g26670	Glyma01g26670	Gm01:35431736-35435954	byo-15-0	byo-15-7	NOTEST	0.172327	0.445368	1.36985	-1.37321	0.169686	1	no
Glyma01g26681	Glyma01g26681	Glyma01g26681	Gm01:35464370-35465052	byo-15-0	byo-15-7	NOTEST	0	0	0	0	1	1	no
Glyma01g26690	Glyma01g26690	Glyma01g26690	Gm01:35468032-35472931	byo-15-0	byo-15-7	NOTEST	0.179008	0.0331788	-2.43169	1.31616	0.188121	1	no
Glyma01g26700	Glyma01g26700	Glyma01g26700	Gm01:35501543-35506434	byo-15-0	byo-15-7	OK	1.3542	1.36883	0.0154948	-0.0231047	0.981567	0.996497	no
Glyma01g26750	Glyma01g26750	Glyma01g26750	Gm01:35572394-35581615	byo-15-0	byo-15-7	NOTEST	0.0387859	0.0641894	0.726801	-0.336029	0.736849	1	no
Glyma01g26766	Glyma01g26766	Glyma01g26766	Gm01:35587717-35588464	byo-15-0	byo-15-7	NOTEST	0	0	0	0	1	1	no
Glyma01g26783	Glyma01g26783	Glyma01g26783	Gm01:35595556-35596652	byo-15-0	byo-15-7	NOTEST	0	0	0	0	1	1	no
Glyma01g26800	Glyma01g26800	Glyma01g26800	Gm01:35606472-35610217	byo-15-0	byo-15-7	NOTEST	0	0	0	0	1	1	no
Glyma01g26813	Glyma01g26813	Glyma01g26813	Gm01:35625153-35625890	byo-15-0	byo-15-7	NOTEST	0	0	0	0	1	1	no
Glyma01g26826	Glyma01g26826	Glyma01g26826	Gm01:35632686-35633208	byo-15-0	byo-15-7	NOTEST	0	0	0	0	1	1	no
Glyma01g26840	Glyma01g26840	Glyma01g26840	Gm01:35643767-35646603	byo-15-0	byo-15-7	OK	13.5149	18.8715	0.481655	-1.00466	0.315062	0.742634	no
Glyma01g26860	Glyma01g26860	Glyma01g26860	Gm01:35688241-35692239	byo-15-0	byo-15-7	NOTEST	0	0	0	0	1	1	no
Glyma01g26900	Glyma01g26900	Glyma01g26900	Gm01:35719443-35723183	byo-15-0	byo-15-7	NOTEST	0	0.0395643	1.79769e+308	1.79769e+308	0.145983	1	no
Glyma01g26915	Glyma01g26915	Glyma01g26915	Gm01:35827768-35828303	byo-15-0	byo-15-7	NOTEST	0	0	0	0	1	1	no
Glyma01g26930	Glyma01g26930	Glyma01g26930	Gm01:35832934-35837033	byo-15-0	byo-15-7	OK	36.5587	35.9008	-0.0261959	0.0481874	0.961567	0.992893	no
Glyma01g26940	Glyma01g26940	Glyma01g26940	Gm01:35863797-35865409	byo-15-0	byo-15-7	OK	2.84825	1.67295	-0.767678	1.19611	0.231653	0.663066	no
Glyma01g26950	Glyma01g26950	Glyma01g26950	Gm01:35866292-35869400	byo-15-0	byo-15-7	OK	39.3527	46.3273	0.2354	-0.457993	0.646957	0.922458	no
Glyma01g26961	Glyma01g26961	Glyma01g26961	Gm01:35952581-35954091	byo-15-0	byo-15-7	NOTEST	0	0	0	0	1	1	no
Glyma01g26970	Glyma01g26970	Glyma01g26970	Gm01:35963018-35964248	byo-15-0	byo-15-7	OK	51.6022	32.3019	-0.675813	1.38746	0.165303	0.573417	no
Glyma01g26981	Glyma01g26981	Glyma01g26981	Gm01:35964318-35966630	byo-15-0	byo-15-7	OK	2.23965	2.39368	0.0959592	-0.0991145	0.921047	0.9857	no
Glyma01g26990	Glyma01g26990	Glyma01g26990	Gm01:35968043-35972769	byo-15-0	byo-15-7	OK	10.4136	15.7496	0.596844	-1.25507	0.209453	0.634623	no
Glyma01g27005	Glyma01g27005	Glyma01g27005	Gm01:35977333-35983210	byo-15-0	byo-15-7	OK	3.12649	0.527253	-2.56797	4.1227	3.74461e-05	0.00193219	yes
Glyma01g27020	Glyma01g27020	Glyma01g27020	Gm01:36004326-36005428	byo-15-0	byo-15-7	NOTEST	0	0.165869	1.79769e+308	1.79769e+308	0.0680698	1	no
Glyma01g27040	Glyma01g27040	Glyma01g27040	Gm01:36021672-36025699	byo-15-0	byo-15-7	NOTEST	0.352817	0.161335	-1.12887	1.21943	0.22268	1	no
Glyma01g27060	Glyma01g27060	Glyma01g27060	Gm01:36063450-36065354	byo-15-0	byo-15-7	OK	3.42501	2.0554	-0.736692	1.21841	0.223067	0.652112	no
Glyma01g27110	Glyma01g27110	Glyma01g27110	Gm01:36127733-36131641	byo-15-0	byo-15-7	NOTEST	0	0	0	0	1	1	no
Glyma01g27120	Glyma01g27120	Glyma01g27120	Gm01:36147154-36151735	byo-15-0	byo-15-7	OK	3.65155	2.29564	-0.669614	1.15361	0.248659	0.683498	no
Glyma01g27130	Glyma01g27130	Glyma01g27130	Gm01:36161870-36165133	byo-15-0	byo-15-7	NOTEST	0.392134	0.125449	-1.64424	1.55833	0.119156	1	no
Glyma01g27145	Glyma01g27145	Glyma01g27145	Gm01:36192774-36194659	byo-15-0	byo-15-7	NOTEST	0	0	0	0	1	1	no
Glyma01g27160	Glyma01g27160	Glyma01g27160	Gm01:36195997-36196273	byo-15-0	byo-15-7	NOTEST	0	0	0	0	1	1	no
Glyma01g27170	Glyma01g27170	Glyma01g27170	Gm01:36211478-36213198	byo-15-0	byo-15-7	OK	1.71844	4.17064	1.27917	-1.47798	0.139414	0.529109	no
Glyma01g27200	Glyma01g27200	Glyma01g27200	Gm01:36246044-36251145	byo-15-0	byo-15-7	OK	9.10333	7.35969	-0.30675	0.630932	0.528085	0.873969	no
Glyma01g27215	Glyma01g27215	Glyma01g27215	Gm01:36263859-36271059	byo-15-0	byo-15-7	OK	0.536926	0.152894	-1.81219	0.956237	0.338952	0.763588	no
Glyma01g27230	Glyma01g27230	Glyma01g27230	Gm01:36326563-36327062	byo-15-0	byo-15-7	NOTEST	0	0	0	0	1	1	no
Glyma01g27240	Glyma01g27240	Glyma01g27240	Gm01:36332421-36351694	byo-15-0	byo-15-7	OK	4.56995	5.2417	0.197857	-0.390495	0.696171	0.938561	no
Glyma01g27250	Glyma01g27250	Glyma01g27250	Gm01:36369066-36382267	byo-15-0	byo-15-7	OK	7.47274	9.37619	0.327364	-0.690746	0.489725	0.85465	no
Glyma01g27260	Glyma01g27260	Glyma01g27260	Gm01:36388728-36391729	byo-15-0	byo-15-7	NOTEST	0	0	0	0	1	1	no
Glyma01g27280	Glyma01g27280	Glyma01g27280	Gm01:36438459-36440199	byo-15-0	byo-15-7	OK	0.855639	1.26927	0.568921	-0.751379	0.452425	0.834016	no
Glyma01g27291	Glyma01g27291	Glyma01g27291	Gm01:36450899-36454001	byo-15-0	byo-15-7	OK	0	0.549832	1.79769e+308	1.79769e+308	0.0348784	0.243171	no
Glyma01g27301	Glyma01g27301	Glyma01g27301	Gm01:36450899-36454001	byo-15-0	byo-15-7	NOTEST	0	0	0	0	1	1	no
Glyma01g27310	Glyma01g27310	Glyma01g27310	Gm01:36464465-36465566	byo-15-0	byo-15-7	NOTEST	0	0	0	0	1	1	no
Glyma01g27360	Glyma01g27360	Glyma01g27360	Gm01:36545021-36547291	byo-15-0	byo-15-7	NOTEST	0.0665633	0.050158	-0.408247	0.357366	0.720817	1	no
Glyma01g27385	Glyma01g27385	Glyma01g27385	Gm01:36610052-36610460	byo-15-0	byo-15-7	NOTEST	0	0	0	0	1	1	no
Glyma01g27410	Glyma01g27410	Glyma01g27410	Gm01:36654803-36655111	byo-15-0	byo-15-7	NOTEST	0	0	0	0	1	1	no
Glyma01g27440	Glyma01g27440	Glyma01g27440	Gm01:36685735-36695527	byo-15-0	byo-15-7	NOTEST	0.0203525	0.034613	0.766104	-0.339524	0.734215	1	no
Glyma01g27455	Glyma01g27455	Glyma01g27455	Gm01:36705021-36712560	byo-15-0	byo-15-7	NOTEST	0.138465	0.137723	-0.00775079	0.00876964	0.993003	1	no
Glyma01g27470	Glyma01g27470	Glyma01g27470	Gm01:36735448-36737186	byo-15-0	byo-15-7	NOTEST	0	0.0245527	1.79769e+308	1.79769e+308	0.194774	1	no
Glyma01g27490	Glyma01g27490	Glyma01g27490	Gm01:36794254-36798874	byo-15-0	byo-15-7	NOTEST	0	0.0217495	1.79769e+308	1.79769e+308	0.325782	1	no
Glyma01g27710	Glyma01g27710	Glyma01g27710	Gm01:36987889-36992462	byo-15-0	byo-15-7	OK	5.35319	2.99041	-0.840056	1.63995	0.101015	0.450303	no
Glyma01g27720	Glyma01g27720	Glyma01g27720	Gm01:37036140-37038376	byo-15-0	byo-15-7	OK	0.574809	0.110936	-2.37335	2.33301	0.0196477	0.171942	no
Glyma01g27765	Glyma01g27765	Glyma01g27765	Gm01:37212445-37213145	byo-15-0	byo-15-7	NOTEST	0	0	0	0	1	1	no
Glyma01g27810	Glyma01g27810	Glyma01g27810	Gm01:37231576-37233997	byo-15-0	byo-15-7	OK	5.02224	3.53779	-0.505481	1.0291	0.303434	0.734258	no
Glyma01g27840	Glyma01g27840	Glyma01g27840	Gm01:37299487-37305059	byo-15-0	byo-15-7	OK	14.7492	6.69112	-1.14032	2.38681	0.0169954	0.157225	no
Glyma01g27860	Glyma01g27860	Glyma01g27860	Gm01:37321469-37321784	byo-15-0	byo-15-7	NOTEST	0	0	0	0	1	1	no
Glyma01g27890	Glyma01g27890	Glyma01g27890	Gm01:37336991-37338203	byo-15-0	byo-15-7	OK	0.604144	0.287633	-1.07066	1.07955	0.280344	0.713348	no
Glyma01g27900	Glyma01g27900	Glyma01g27900	Gm01:37379998-37383931	byo-15-0	byo-15-7	OK	16.1073	8.12729	-0.986865	2.07385	0.0380936	0.256503	no
Glyma01g27910	Glyma01g27910	Glyma01g27910	Gm01:37406845-37408224	byo-15-0	byo-15-7	NOTEST	0	0	0	0	1	1	no
Glyma01g27941	Glyma01g27941	Glyma01g27941	Gm01:37433263-37434146	byo-15-0	byo-15-7	NOTEST	0	0	0	0	1	1	no
Glyma01g27970	Glyma01g27970	Glyma01g27970	Gm01:37457417-37460795	byo-15-0	byo-15-7	NOTEST	0	0	0	0	1	1	no
Glyma01g28026	Glyma01g28026	Glyma01g28026	Gm01:37580338-37581229	byo-15-0	byo-15-7	NOTEST	0	0	0	0	1	1	no
Glyma01g28082	Glyma01g28082	Glyma01g28082	Gm01:37587054-37587942	byo-15-0	byo-15-7	NOTEST	0	0	0	0	1	1	no
Glyma01g28139	Glyma01g28139	Glyma01g28139	Gm01:37594369-37595242	byo-15-0	byo-15-7	NOTEST	0	0	0	0	1	1	no
Glyma01g28196	Glyma01g28196	Glyma01g28196	Gm01:37611247-37612183	byo-15-0	byo-15-7	NOTEST	0	0	0	0	1	1	no
Glyma01g28253	Glyma01g28253	Glyma01g28253	Gm01:37911350-37912244	byo-15-0	byo-15-7	NOTEST	0	0	0	0	1	1	no
Glyma01g28310	Glyma01g28310	Glyma01g28310	Gm01:37913283-37917411	byo-15-0	byo-15-7	OK	2.16485	1.86657	-0.213878	0.28141	0.778396	0.956691	no
Glyma01g28353	Glyma01g28353	Glyma01g28353	Gm01:38060909-38061301	byo-15-0	byo-15-7	NOTEST	0.216709	0	-1.79769e+308	-1.79769e+308	0.207061	1	no
Glyma01g28396	Glyma01g28396	Glyma01g28396	Gm01:38199627-38200321	byo-15-0	byo-15-7	OK	406.274	238.393	-0.76911	1.50003	0.133607	0.517749	no
Glyma01g28440	Glyma01g28440	Glyma01g28440	Gm01:38205261-38207629	byo-15-0	byo-15-7	OK	1.47339	2.78886	0.920537	-1.57883	0.114375	0.478454	no
Glyma01g28460	Glyma01g28460	Glyma01g28460	Gm01:38222786-38224222	byo-15-0	byo-15-7	NOTEST	0	0	0	0	1	1	no
Glyma01g28480	Glyma01g28480	Glyma01g28480	Gm01:38248791-38250401	byo-15-0	byo-15-7	NOTEST	0	0	0	0	1	1	no
Glyma01g28491	Glyma01g28491	Glyma01g28491	Gm01:38259681-38270227	byo-15-0	byo-15-7	NOTEST	0	0	0	0	1	1	no
Glyma01g28500	Glyma01g28500	Glyma01g28500	Gm01:38308110-38309077	byo-15-0	byo-15-7	OK	95.3123	62.7687	-0.602619	1.23204	0.217934	0.645821	no
Glyma01g28511	Glyma01g28511	Glyma01g28511	Gm01:38309608-38311167	byo-15-0	byo-15-7	NOTEST	0.049615	0.0283414	-0.807867	0.386379	0.699216	1	no
Glyma01g28520	Glyma01g28520	Glyma01g28520	Gm01:38386523-38391051	byo-15-0	byo-15-7	OK	9.91096	5.88172	-0.752787	1.36079	0.173581	0.584403	no
Glyma01g28550	Glyma01g28550	Glyma01g28550	Gm01:38422858-38424428	byo-15-0	byo-15-7	NOTEST	0	0	0	0	1	1	no
Glyma01g28626	Glyma01g28626	Glyma01g28626	Gm01:38529390-38530425	byo-15-0	byo-15-7	NOTEST	0	0	0	0	1	1	no
Glyma01g28703	Glyma01g28703	Glyma01g28703	Gm01:38575000-38577422	byo-15-0	byo-15-7	OK	0.58837	1.64144	1.48017	-1.78435	0.0743676	0.378061	no
Glyma01g28780	Glyma01g28780	Glyma01g28780	Gm01:38596171-38598279	byo-15-0	byo-15-7	NOTEST	0.177056	0	-1.79769e+308	-1.79769e+308	0.0181958	1	no
Glyma01g28800	Glyma01g28800	Glyma01g28800	Gm01:38660680-38662575	byo-15-0	byo-15-7	NOTEST	0	0	0	0	1	1	no
Glyma01g28805	Glyma01g28805	Glyma01g28805	Gm01:38690273-38690984	byo-15-0	byo-15-7	NOTEST	0	0	0	0	1	1	no
Glyma01g28810	Glyma01g28810	Glyma01g28810	Gm01:38692764-38695649	byo-15-0	byo-15-7	OK	1382.97	1609.32	0.218683	-0.217798	0.827587	0.966534	no
Glyma01g28820	Glyma01g28820	Glyma01g28820	Gm01:38703774-38707276	byo-15-0	byo-15-7	OK	54.3699	65.6541	0.272078	-0.473635	0.635761	0.919576	no
Glyma01g28830	Glyma01g28830	Glyma01g28830	Gm01:38709310-38713735	byo-15-0	byo-15-7	OK	19.6448	12.2595	-0.680254	1.43363	0.151677	0.551685	no
Glyma01g28841	Glyma01g28841	Glyma01g28841	Gm01:38749817-38751606	byo-15-0	byo-15-7	NOTEST	0	0	0	0	1	1	no
Glyma01g28850	Glyma01g28850	Glyma01g28850	Gm01:38758937-38772979	byo-15-0	byo-15-7	NOTEST	0	0.0249056	1.79769e+308	1.79769e+308	0.194774	1	no
Glyma01g28865	Glyma01g28865	Glyma01g28865	Gm01:38774846-38778332	byo-15-0	byo-15-7	NOTEST	0.265614	0	-1.79769e+308	-1.79769e+308	0.0181958	1	no
Glyma01g28880	Glyma01g28880	Glyma01g28880	Gm01:38811474-38819368	byo-15-0	byo-15-7	NOTEST	0	0	0	0	1	1	no
Glyma01g28890	Glyma01g28890	Glyma01g28890	Gm01:38825959-38830479	byo-15-0	byo-15-7	NOTEST	0	0	0	0	1	1	no
Glyma01g28936	Glyma01g28936	Glyma01g28936	Gm01:38986023-38989868	byo-15-0	byo-15-7	OK	1.09762	0.747613	-0.554011	0.860345	0.389599	0.800108	no
Glyma01g28983	Glyma01g28983	Glyma01g28983	Gm01:39101552-39101978	byo-15-0	byo-15-7	NOTEST	0	0	0	0	1	1	no
Glyma01g29030	Glyma01g29030	Glyma01g29030	Gm01:39117816-39121119	byo-15-0	byo-15-7	NOTEST	0.0413044	0.0982679	1.25042	-0.990944	0.321713	1	no
Glyma01g29070	Glyma01g29070	Glyma01g29070	Gm01:39200746-39201279	byo-15-0	byo-15-7	NOTEST	0	0	0	0	1	1	no
Glyma01g29091	Glyma01g29091	Glyma01g29091	Gm01:39202322-39203074	byo-15-0	byo-15-7	NOTEST	0	0	0	0	1	1	no
Glyma01g29110	Glyma01g29110	Glyma01g29110	Gm01:39206637-39207905	byo-15-0	byo-15-7	NOTEST	0	0	0	0	1	1	no
Glyma01g29131	Glyma01g29131	Glyma01g29131	Gm01:39211228-39211501	byo-15-0	byo-15-7	NOTEST	0	0	0	0	1	1	no
Glyma01g29150	Glyma01g29150	Glyma01g29150	Gm01:39249319-39254445	byo-15-0	byo-15-7	OK	1.41703	4.23625	1.57992	-2.89134	0.00383597	0.059683	no
Glyma01g29171	Glyma01g29171	Glyma01g29171	Gm01:39255360-39265417	byo-15-0	byo-15-7	OK	0.860886	1.64258	0.932068	-1.37184	0.170114	0.580332	no
Glyma01g29190	Glyma01g29190	Glyma01g29190	Gm01:39285279-39288819	byo-15-0	byo-15-7	NOTEST	0	0.0261794	1.79769e+308	1.79769e+308	0.229543	1	no
Glyma01g29220	Glyma01g29220	Glyma01g29220	Gm01:39316166-39317298	byo-15-0	byo-15-7	NOTEST	0	0	0	0	1	1	no
Glyma01g29230	Glyma01g29230	Glyma01g29230	Gm01:39317900-39318629	byo-15-0	byo-15-7	NOTEST	0	0	0	0	1	1	no
Glyma01g29255	Glyma01g29255	Glyma01g29255	Gm01:39318953-39319509	byo-15-0	byo-15-7	NOTEST	0	0	0	0	1	1	no
Glyma01g29280	Glyma01g29280	Glyma01g29280	Gm01:39350672-39358098	byo-15-0	byo-15-7	OK	2.77904	2.48751	-0.159885	0.269615	0.787457	0.95816	no
Glyma01g29305	Glyma01g29305	Glyma01g29305	Gm01:39376341-39388072	byo-15-0	byo-15-7	OK	2.10296	0.809664	-1.37703	1.79874	0.0720606	0.370982	no
Glyma01g29330	Glyma01g29330	Glyma01g29330	Gm01:39403861-39412277	byo-15-0	byo-15-7	OK	3.77155	1.09533	-1.7838	2.85685	0.00427869	0.0637948	no
Glyma01g29346	Glyma01g29346	Glyma01g29346	Gm01:39421332-39429591	byo-15-0	byo-15-7	OK	2.16736	1.36971	-0.662066	0.923002	0.356006	0.775903	no
Glyma01g29362	Glyma01g29362	Glyma01g29362	Gm01:39443729-39458833	byo-15-0	byo-15-7	OK	1.69162	1.16138	-0.542565	0.814987	0.41508	0.814971	no
Glyma01g29378	Glyma01g29378	Glyma01g29378	Gm01:39478263-39516299	byo-15-0	byo-15-7	OK	1.57569	0.580104	-1.4416	2.19402	0.0282342	0.215442	no
Glyma01g29394	Glyma01g29394	Glyma01g29394	Gm01:39526777-39530894	byo-15-0	byo-15-7	NOTEST	0	0	0	0	1	1	no
Glyma01g29410	Glyma01g29410	Glyma01g29410	Gm01:39591646-39594997	byo-15-0	byo-15-7	OK	0.689438	0.255688	-1.43104	1.61057	0.107273	0.464873	no
Glyma01g29420	Glyma01g29420	Glyma01g29420	Gm01:39597740-39602942	byo-15-0	byo-15-7	OK	13.0588	24.0152	0.878926	-1.84254	0.0653959	0.352503	no
Glyma01g29440	Glyma01g29440	Glyma01g29440	Gm01:39655886-39656000	byo-15-0	byo-15-7	NOTEST	0	0	0	0	1	1	no
Glyma01g29470	Glyma01g29470	Glyma01g29470	Gm01:39787035-39797571	byo-15-0	byo-15-7	OK	3.18016	8.04893	1.3397	-2.69723	0.00699191	0.0892366	no
Glyma01g29480	Glyma01g29480	Glyma01g29480	Gm01:39799515-39801235	byo-15-0	byo-15-7	NOTEST	0	0	0	0	1	1	no
Glyma01g29495	Glyma01g29495	Glyma01g29495	Gm01:39818462-39819244	byo-15-0	byo-15-7	NOTEST	0.11272	0	-1.79769e+308	-1.79769e+308	0.207061	1	no
Glyma01g29511	Glyma01g29511	Glyma01g29511	Gm01:39824538-39825839	byo-15-0	byo-15-7	NOTEST	0	0	0	0	1	1	no
Glyma01g29525	Glyma01g29525	Glyma01g29525	Gm01:39837032-39837374	byo-15-0	byo-15-7	NOTEST	0	0	0	0	1	1	no
Glyma01g29540	Glyma01g29540	Glyma01g29540	Gm01:39848379-39851083	byo-15-0	byo-15-7	OK	26.3219	24.2088	-0.120731	0.252529	0.800632	0.962107	no
Glyma01g29570	Glyma01g29570	Glyma01g29570	Gm01:39879227-39883100	byo-15-0	byo-15-7	NOTEST	0.104927	0.0796399	-0.397817	0.389651	0.696794	1	no
Glyma01g29580	Glyma01g29580	Glyma01g29580	Gm01:39898856-39902291	byo-15-0	byo-15-7	NOTEST	0.0687347	0.0564008	-0.285323	0.24649	0.805303	1	no
Glyma01g29600	Glyma01g29600	Glyma01g29600	Gm01:39918097-39921140	byo-15-0	byo-15-7	NOTEST	0	0	0	0	1	1	no
Glyma01g29615	Glyma01g29615	Glyma01g29615	Gm01:39935345-39939812	byo-15-0	byo-15-7	NOTEST	0.0889896	0.121347	0.447432	-0.451988	0.651277	1	no
Glyma01g29630	Glyma01g29630	Glyma01g29630	Gm01:39945735-39949387	byo-15-0	byo-15-7	OK	31.0808	20.5299	-0.598295	1.18752	0.235022	0.667603	no
Glyma01g29643	Glyma01g29643	Glyma01g29643	Gm01:39958765-39959672	byo-15-0	byo-15-7	NOTEST	0	0	0	0	1	1	no
Glyma01g29656	Glyma01g29656	Glyma01g29656	Gm01:39965927-39966511	byo-15-0	byo-15-7	NOTEST	0	0	0	0	1	1	no
Glyma01g29670	Glyma01g29670	Glyma01g29670	Gm01:39988960-39991138	byo-15-0	byo-15-7	OK	0.141807	0.602006	2.08585	-2.16045	0.0307379	0.226704	no
Glyma01g29715	Glyma01g29715	Glyma01g29715	Gm01:40029815-40030406	byo-15-0	byo-15-7	NOTEST	0	0.259704	1.79769e+308	1.79769e+308	0.145983	1	no
Glyma01g29760	Glyma01g29760	Glyma01g29760	Gm01:40077200-40079998	byo-15-0	byo-15-7	NOTEST	0.04604	0.0561159	0.285522	-0.116733	0.907071	1	no
Glyma01g29816	Glyma01g29816	Glyma01g29816	Gm01:40154962-40155672	byo-15-0	byo-15-7	NOTEST	0	0.0721132	1.79769e+308	1.79769e+308	0.255536	1	no
Glyma01g29873	Glyma01g29873	Glyma01g29873	Gm01:40234344-40236298	byo-15-0	byo-15-7	NOTEST	0	0	0	0	1	1	no
Glyma01g29930	Glyma01g29930	Glyma01g29930	Gm01:40499102-40503250	byo-15-0	byo-15-7	OK	2.98435	2.21932	-0.427301	0.617925	0.536625	0.877761	no
Glyma01g29950	Glyma01g29950	Glyma01g29950	Gm01:40560867-40564466	byo-15-0	byo-15-7	OK	7.50574	6.8826	-0.125042	0.253386	0.79997	0.961826	no
Glyma01g29970	Glyma01g29970	Glyma01g29970	Gm01:40574051-40575558	byo-15-0	byo-15-7	NOTEST	0	0	0	0	1	1	no
Glyma01g30000	Glyma01g30000	Glyma01g30000	Gm01:40668497-40669995	byo-15-0	byo-15-7	NOTEST	0	0	0	0	1	1	no
Glyma01g30010	Glyma01g30010	Glyma01g30010	Gm01:40681967-40683465	byo-15-0	byo-15-7	NOTEST	0	0	0	0	1	1	no
Glyma01g30020	Glyma01g30020	Glyma01g30020	Gm01:40733504-40735002	byo-15-0	byo-15-7	NOTEST	0	0	0	0	1	1	no
Glyma01g30030	Glyma01g30030	Glyma01g30030	Gm01:40745198-40746696	byo-15-0	byo-15-7	NOTEST	0	0	0	0	1	1	no
Glyma01g30040	Glyma01g30040	Glyma01g30040	Gm01:40756924-40758421	byo-15-0	byo-15-7	NOTEST	0	0	0	0	1	1	no
Glyma01g30060	Glyma01g30060	Glyma01g30060	Gm01:40769686-40771162	byo-15-0	byo-15-7	NOTEST	0	0	0	0	1	1	no
Glyma01g30080	Glyma01g30080	Glyma01g30080	Gm01:40777029-40778052	byo-15-0	byo-15-7	NOTEST	0	0	0	0	1	1	no
Glyma01g30300	Glyma01g30300	Glyma01g30300	Gm01:40952282-40957143	byo-15-0	byo-15-7	OK	2.02845	2.6358	0.377866	-0.630433	0.528411	0.874276	no
Glyma01g30320	Glyma01g30320	Glyma01g30320	Gm01:40964890-40985483	byo-15-0	byo-15-7	OK	5.22729	7.21699	0.465336	-0.957606	0.338262	0.762984	no
Glyma01g30335	Glyma01g30335	Glyma01g30335	Gm01:40964890-40985483	byo-15-0	byo-15-7	OK	0.619118	0.50087	-0.305778	0.128535	0.897726	0.982396	no
Glyma01g30350	Glyma01g30350	Glyma01g30350	Gm01:41014087-41016040	byo-15-0	byo-15-7	OK	35.2612	52.1283	0.563984	-1.15769	0.246991	0.682414	no
Glyma01g30370	Glyma01g30370	Glyma01g30370	Gm01:41043490-41043758	byo-15-0	byo-15-7	NOTEST	0	0	0	0	1	1	no
Glyma01g30390	Glyma01g30390	Glyma01g30390	Gm01:41062775-41066889	byo-15-0	byo-15-7	OK	3.42124	3.11455	-0.135496	0.23258	0.816088	0.965222	no
Glyma01g30400	Glyma01g30400	Glyma01g30400	Gm01:41067190-41075707	byo-15-0	byo-15-7	OK	8.3382	9.36094	0.166918	-0.351081	0.725528	0.945906	no
Glyma01g30431	Glyma01g30431	Glyma01g30431	Gm01:41163921-41165539	byo-15-0	byo-15-7	NOTEST	0	0	0	0	1	1	no
Glyma01g30460	Glyma01g30460	Glyma01g30460	Gm01:41170972-41176563	byo-15-0	byo-15-7	NOTEST	0	0	0	0	1	1	no
Glyma01g30485	Glyma01g30485	Glyma01g30485	Gm01:41170972-41176563	byo-15-0	byo-15-7	NOTEST	0	0.018306	1.79769e+308	1.79769e+308	0.229543	1	no
Glyma01g30511	Glyma01g30511	Glyma01g30511	Gm01:41210645-41210897	byo-15-0	byo-15-7	NOTEST	0	0	0	0	1	1	no
Glyma01g30535	Glyma01g30535	Glyma01g30535	Gm01:41215563-41218988	byo-15-0	byo-15-7	NOTEST	0	0	0	0	1	1	no
Glyma01g30560	Glyma01g30560	Glyma01g30560	Gm01:41232630-41234794	byo-15-0	byo-15-7	NOTEST	0	0	0	0	1	1	no
Glyma01g30610	Glyma01g30610	Glyma01g30610	Gm01:41406971-41411553	byo-15-0	byo-15-7	NOTEST	0	0	0	0	1	1	no
Glyma01g30626	Glyma01g30626	Glyma01g30626	Gm01:41440314-41440973	byo-15-0	byo-15-7	NOTEST	0	0	0	0	1	1	no
Glyma01g30643	Glyma01g30643	Glyma01g30643	Gm01:41457347-41461938	byo-15-0	byo-15-7	NOTEST	0	0	0	0	1	1	no
Glyma01g30660	Glyma01g30660	Glyma01g30660	Gm01:41493462-41493999	byo-15-0	byo-15-7	NOTEST	0	0	0	0	1	1	no
Glyma01g30670	Glyma01g30670	Glyma01g30670	Gm01:41495108-41496829	byo-15-0	byo-15-7	NOTEST	0	0.0421604	1.79769e+308	1.79769e+308	0.194774	1	no
Glyma01g30900	Glyma01g30900	Glyma01g30900	Gm01:41673575-41673782	byo-15-0	byo-15-7	NOTEST	0	0	0	0	1	1	no
Glyma01g30910	Glyma01g30910	Glyma01g30910	Gm01:41681659-41690953	byo-15-0	byo-15-7	OK	12.482	15.1663	0.281028	-0.589326	0.555642	0.885681	no
Glyma01g30920	Glyma01g30920	Glyma01g30920	Gm01:41691541-41699290	byo-15-0	byo-15-7	NOTEST	0.032747	0.127692	1.96323	-1.3568	0.174844	1	no
Glyma01g30982	Glyma01g30982	Glyma01g30982	Gm01:41712879-41714252	byo-15-0	byo-15-7	OK	0.74981	0.509452	-0.557577	0.621265	0.534425	0.877134	no
Glyma01g31044	Glyma01g31044	Glyma01g31044	Gm01:41890431-41892644	byo-15-0	byo-15-7	OK	1.68119	1.20244	-0.483518	0.677862	0.497859	0.858576	no
Glyma01g31107	Glyma01g31107	Glyma01g31107	Gm01:41928201-41933073	byo-15-0	byo-15-7	NOTEST	0	0	0	0	1	1	no
Glyma01g31170	Glyma01g31170	Glyma01g31170	Gm01:41986790-41991338	byo-15-0	byo-15-7	OK	2.58655	2.92565	0.17773	-0.34918	0.726954	0.946263	no
Glyma01g31180	Glyma01g31180	Glyma01g31180	Gm01:41992765-41993572	byo-15-0	byo-15-7	OK	0.126267	0.986108	2.96527	-2.12168	0.033865	0.239956	no
Glyma01g31230	Glyma01g31230	Glyma01g31230	Gm01:42040491-42046500	byo-15-0	byo-15-7	NOTEST	0	0	0	0	1	1	no
Glyma01g31260	Glyma01g31260	Glyma01g31260	Gm01:42062020-42069161	byo-15-0	byo-15-7	OK	4.47556	4.79947	0.100807	-0.20139	0.840394	0.970096	no
Glyma01g31270	Glyma01g31270	Glyma01g31270	Gm01:42071523-42074445	byo-15-0	byo-15-7	OK	10.6098	24.5052	1.20769	-2.51056	0.0120539	0.126356	no
Glyma01g31275	Glyma01g31275	Glyma01g31275	Gm01:42077853-42078844	byo-15-0	byo-15-7	NOTEST	0	0	0	0	1	1	no
Glyma01g31280	Glyma01g31280	Glyma01g31280	Gm01:42077853-42078844	byo-15-0	byo-15-7	NOTEST	0	0	0	0	1	1	no
Glyma01g31300	Glyma01g31300	Glyma01g31300	Gm01:42124055-42127597	byo-15-0	byo-15-7	OK	117.212	15.0215	-2.96402	5.8971	3.69955e-09	9.74926e-07	yes
Glyma01g31311	Glyma01g31311	Glyma01g31311	Gm01:42143417-42149831	byo-15-0	byo-15-7	OK	8.09209	7.79783	-0.0534406	0.099493	0.920747	0.985614	no
Glyma01g31320	Glyma01g31320	Glyma01g31320	Gm01:42162374-42164312	byo-15-0	byo-15-7	OK	5.33356	10.9924	1.04334	-2.10617	0.0351894	0.244557	no
Glyma01g31341	Glyma01g31341	Glyma01g31341	Gm01:42226588-42230852	byo-15-0	byo-15-7	NOTEST	0.0485731	0	-1.79769e+308	-1.79769e+308	0.124059	1	no
Glyma01g31360	Glyma01g31360	Glyma01g31360	Gm01:42232501-42236451	byo-15-0	byo-15-7	OK	20.9773	25.1364	0.260952	-0.518781	0.603913	0.906301	no
Glyma01g31370	Glyma01g31370	Glyma01g31370	Gm01:42261741-42265856	byo-15-0	byo-15-7	NOTEST	0.292743	0.164947	-0.827635	0.877405	0.380267	1	no
Glyma01g31425	Glyma01g31425	Glyma01g31425	Gm01:42373253-42374275	byo-15-0	byo-15-7	OK	3.07289	2.71839	-0.176847	0.204966	0.837599	0.969261	no
Glyma01g31480	Glyma01g31480	Glyma01g31480	Gm01:42378220-42384123	byo-15-0	byo-15-7	NOTEST	0.295141	0.239539	-0.301143	0.373648	0.708666	1	no
Glyma01g31520	Glyma01g31520	Glyma01g31520	Gm01:42469464-42474210	byo-15-0	byo-15-7	NOTEST	0	0	0	0	1	1	no
Glyma01g31550	Glyma01g31550	Glyma01g31550	Gm01:42548413-42558287	byo-15-0	byo-15-7	NOTEST	0	0	0	0	1	1	no
Glyma01g31570	Glyma01g31570	Glyma01g31570	Gm01:42586307-42593931	byo-15-0	byo-15-7	OK	5.18324	6.09403	0.233541	-0.47531	0.634566	0.91937	no
Glyma01g31581	Glyma01g31581	Glyma01g31581	Gm01:42597638-42599280	byo-15-0	byo-15-7	NOTEST	0	0	0	0	1	1	no
Glyma01g31590	Glyma01g31590	Glyma01g31590	Gm01:42607296-42611243	byo-15-0	byo-15-7	NOTEST	0.190723	0.201637	0.0802829	-0.0937273	0.925326	1	no
Glyma01g31600	Glyma01g31600	Glyma01g31600	Gm01:42628300-42629673	byo-15-0	byo-15-7	OK	41.0877	21.9824	-0.902356	1.86818	0.061737	0.341791	no
Glyma01g31610	Glyma01g31610	Glyma01g31610	Gm01:42631340-42634983	byo-15-0	byo-15-7	OK	18.5682	19.101	0.0408141	-0.0862931	0.931233	0.987675	no
Glyma01g31630	Glyma01g31630	Glyma01g31630	Gm01:42661065-42664809	byo-15-0	byo-15-7	NOTEST	0.313362	0.263738	-0.248725	0.1898	0.849466	1	no
Glyma01g31636	Glyma01g31636	Glyma01g31636	Gm01:42667422-42670895	byo-15-0	byo-15-7	NOTEST	0	0	0	0	1	1	no
Glyma01g31643	Glyma01g31643	Glyma01g31643	Gm01:42681129-42683618	byo-15-0	byo-15-7	NOTEST	0	0	0	0	1	1	no
Glyma01g31650	Glyma01g31650	Glyma01g31650	Gm01:42697267-42701819	byo-15-0	byo-15-7	NOTEST	0	0	0	0	1	1	no
Glyma01g31660	Glyma01g31660	Glyma01g31660	Gm01:42724418-42726114	byo-15-0	byo-15-7	OK	0.296616	0.732081	1.30341	-1.38808	0.165112	0.572998	no
Glyma01g31670	Glyma01g31670	Glyma01g31670	Gm01:42752424-42753269	byo-15-0	byo-15-7	NOTEST	0	0	0	0	1	1	no
Glyma01g31691	Glyma01g31691	Glyma01g31691	Gm01:42756407-42766923	byo-15-0	byo-15-7	NOTEST	0	0	0	0	1	1	no
Glyma01g31711	Glyma01g31711	Glyma01g31711	Gm01:42786261-42789612	byo-15-0	byo-15-7	NOTEST	0	0	0	0	1	1	no
Glyma01g31730	Glyma01g31730	Glyma01g31730	Gm01:42867418-42868294	byo-15-0	byo-15-7	OK	0.187938	0.839051	2.1585	-1.90612	0.0566349	0.325557	no
Glyma01g31750	Glyma01g31750	Glyma01g31750	Gm01:42942064-42943179	byo-15-0	byo-15-7	OK	23.288	72.9208	1.64674	-3.36499	0.000765474	0.019092	yes
Glyma01g31760	Glyma01g31760	Glyma01g31760	Gm01:42947350-42947710	byo-15-0	byo-15-7	NOTEST	0	0	0	0	1	1	no
Glyma01g31780	Glyma01g31780	Glyma01g31780	Gm01:42956928-42957282	byo-15-0	byo-15-7	NOTEST	0	0	0	0	1	1	no
Glyma01g31801	Glyma01g31801	Glyma01g31801	Gm01:43007888-43008997	byo-15-0	byo-15-7	NOTEST	0	0	0	0	1	1	no
Glyma01g31820	Glyma01g31820	Glyma01g31820	Gm01:43013160-43013421	byo-15-0	byo-15-7	NOTEST	0	0	0	0	1	1	no
Glyma01g31830	Glyma01g31830	Glyma01g31830	Gm01:43025615-43026886	byo-15-0	byo-15-7	OK	8.51333	1.26191	-2.75411	4.31862	1.5701e-05	0.000977384	yes
Glyma01g31840	Glyma01g31840	Glyma01g31840	Gm01:43069330-43072880	byo-15-0	byo-15-7	OK	0.620495	0.554482	-0.162279	0.223702	0.822989	0.966092	no
Glyma01g31850	Glyma01g31850	Glyma01g31850	Gm01:43076459-43079732	byo-15-0	byo-15-7	NOTEST	0	0.0446382	1.79769e+308	1.79769e+308	0.194774	1	no
Glyma01g31860	Glyma01g31860	Glyma01g31860	Gm01:43090292-43094391	byo-15-0	byo-15-7	NOTEST	0	0	0	0	1	1	no
Glyma01g31890	Glyma01g31890	Glyma01g31890	Gm01:43130697-43137550	byo-15-0	byo-15-7	OK	0.729473	0.601667	-0.27789	0.31235	0.754774	0.953482	no
Glyma01g31900	Glyma01g31900	Glyma01g31900	Gm01:43140964-43144007	byo-15-0	byo-15-7	NOTEST	0	0.0741181	1.79769e+308	1.79769e+308	0.0680698	1	no
Glyma01g31910	Glyma01g31910	Glyma01g31910	Gm01:43154205-43156585	byo-15-0	byo-15-7	NOTEST	0	0	0	0	1	1	no
Glyma01g31921	Glyma01g31921	Glyma01g31921	Gm01:43157131-43160950	byo-15-0	byo-15-7	OK	0.662996	0.94541	0.51194	-0.584059	0.55918	0.88722	no
Glyma01g31930	Glyma01g31930	Glyma01g31930	Gm01:43173872-43179341	byo-15-0	byo-15-7	OK	1.22293	0.927378	-0.399108	0.644483	0.519262	0.869741	no
Glyma01g31940	Glyma01g31940	Glyma01g31940	Gm01:43217711-43224924	byo-15-0	byo-15-7	NOTEST	0.146405	0.221586	0.597904	-0.511717	0.608849	1	no
Glyma01g31961	Glyma01g31961	Glyma01g31961	Gm01:43241123-43245445	byo-15-0	byo-15-7	NOTEST	0	0	0	0	1	1	no
Glyma01g31980	Glyma01g31980	Glyma01g31980	Gm01:43250905-43255641	byo-15-0	byo-15-7	NOTEST	0	0.0751182	1.79769e+308	1.79769e+308	0.381232	1	no
Glyma01g31990	Glyma01g31990	Glyma01g31990	Gm01:43250905-43255641	byo-15-0	byo-15-7	OK	5.69027	5.32039	-0.0969661	0.170341	0.864742	0.975331	no
Glyma01g32000	Glyma01g32000	Glyma01g32000	Gm01:43264508-43272659	byo-15-0	byo-15-7	OK	3.3411	4.83151	0.532149	-1.12361	0.261179	0.696183	no
Glyma01g32010	Glyma01g32010	Glyma01g32010	Gm01:43337913-43338530	byo-15-0	byo-15-7	NOTEST	0	0	0	0	1	1	no
Glyma01g32020	Glyma01g32020	Glyma01g32020	Gm01:43341907-43343025	byo-15-0	byo-15-7	NOTEST	0	0	0	0	1	1	no
Glyma01g32031	Glyma01g32031	Glyma01g32031	Gm01:43354010-43355755	byo-15-0	byo-15-7	NOTEST	0	0	0	0	1	1	no
Glyma01g32040	Glyma01g32040	Glyma01g32040	Gm01:43398690-43400994	byo-15-0	byo-15-7	NOTEST	0	0	0	0	1	1	no
Glyma01g32070	Glyma01g32070	Glyma01g32070	Gm01:43424973-43427243	byo-15-0	byo-15-7	NOTEST	0	0	0	0	1	1	no
Glyma01g32081	Glyma01g32081	Glyma01g32081	Gm01:43450179-43450730	byo-15-0	byo-15-7	NOTEST	0	0	0	0	1	1	no
Glyma01g32090	Glyma01g32090	Glyma01g32090	Gm01:43463846-43470841	byo-15-0	byo-15-7	OK	2.12442	2.11763	-0.00461741	0.00789927	0.993697	0.998723	no
Glyma01g32103	Glyma01g32103	Glyma01g32103	Gm01:43463846-43470841	byo-15-0	byo-15-7	NOTEST	0.163976	0.361766	1.14157	-0.292088	0.770219	1	no
Glyma01g32116	Glyma01g32116	Glyma01g32116	Gm01:43502972-43506823	byo-15-0	byo-15-7	NOTEST	0.135001	0	-1.79769e+308	-1.79769e+308	0.0315054	1	no
Glyma01g32130	Glyma01g32130	Glyma01g32130	Gm01:43553617-43555903	byo-15-0	byo-15-7	NOTEST	0	0.0627559	1.79769e+308	1.79769e+308	0.320967	1	no
Glyma01g32140	Glyma01g32140	Glyma01g32140	Gm01:43570735-43574743	byo-15-0	byo-15-7	OK	0	0.593816	1.79769e+308	1.79769e+308	0.014379	0.140913	no
Glyma01g32160	Glyma01g32160	Glyma01g32160	Gm01:43604977-43607065	byo-15-0	byo-15-7	NOTEST	0	0	0	0	1	1	no
Glyma01g32190	Glyma01g32190	Glyma01g32190	Gm01:43621003-43623360	byo-15-0	byo-15-7	NOTEST	0	0	0	0	1	1	no
Glyma01g32211	Glyma01g32211	Glyma01g32211	Gm01:43638172-43638537	byo-15-0	byo-15-7	NOTEST	0	0	0	0	1	1	no
Glyma01g32230	Glyma01g32230	Glyma01g32230	Gm01:43687454-43687922	byo-15-0	byo-15-7	NOTEST	0	0	0	0	1	1	no
Glyma01g32270	Glyma01g32270	Glyma01g32270	Gm01:43720350-43722510	byo-15-0	byo-15-7	NOTEST	0	0	0	0	1	1	no
Glyma01g32291	Glyma01g32291	Glyma01g32291	Gm01:43773470-43774094	byo-15-0	byo-15-7	OK	1.78518	0.36559	-2.28777	1.6769	0.0935622	0.431235	no
Glyma01g32310	Glyma01g32310	Glyma01g32310	Gm01:43784204-43786716	byo-15-0	byo-15-7	NOTEST	0	0	0	0	1	1	no
Glyma01g32340	Glyma01g32340	Glyma01g32340	Gm01:43819827-43820154	byo-15-0	byo-15-7	NOTEST	0	0	0	0	1	1	no
Glyma01g32360	Glyma01g32360	Glyma01g32360	Gm01:43828911-43832736	byo-15-0	byo-15-7	NOTEST	0	0	0	0	1	1	no
Glyma01g32370	Glyma01g32370	Glyma01g32370	Gm01:43834206-43835697	byo-15-0	byo-15-7	OK	2.6217	1.04241	-1.33058	1.89095	0.0586312	0.332037	no
Glyma01g32380	Glyma01g32380	Glyma01g32380	Gm01:43870379-43873398	byo-15-0	byo-15-7	OK	1.0125	1.02229	0.0138874	-0.0210749	0.983186	0.996806	no
Glyma01g32390	Glyma01g32390	Glyma01g32390	Gm01:43912452-43917776	byo-15-0	byo-15-7	NOTEST	0.367668	0	-1.79769e+308	-1.79769e+308	0.0370715	1	no
Glyma01g32400	Glyma01g32400	Glyma01g32400	Gm01:43922908-43926832	byo-15-0	byo-15-7	OK	7.09176	1.05402	-2.75025	4.77839	1.76702e-06	0.000168582	yes
Glyma01g32415	Glyma01g32415	Glyma01g32415	Gm01:43929164-43930175	byo-15-0	byo-15-7	NOTEST	0	0	0	0	1	1	no
Glyma01g32430	Glyma01g32430	Glyma01g32430	Gm01:43974483-43977133	byo-15-0	byo-15-7	NOTEST	0.149028	0.313219	1.07159	-1.26202	0.206943	1	no
Glyma01g32440	Glyma01g32440	Glyma01g32440	Gm01:43989758-43991730	byo-15-0	byo-15-7	OK	2.36595	2.44509	0.0474665	-0.0833978	0.933535	0.98825	no
Glyma01g32450	Glyma01g32450	Glyma01g32450	Gm01:44035709-44042969	byo-15-0	byo-15-7	OK	45.5378	41.5661	-0.131656	0.244005	0.807227	0.963323	no
Glyma01g32460	Glyma01g32460	Glyma01g32460	Gm01:44035709-44042969	byo-15-0	byo-15-7	LOWDATA	0	0	-0.131656	0	1	1	no
Glyma01g32480	Glyma01g32480	Glyma01g32480	Gm01:44085644-44091881	byo-15-0	byo-15-7	NOTEST	0	0	0	0	1	1	no
Glyma01g32680	Glyma01g32680	Glyma01g32680	Gm01:44207946-44213690	byo-15-0	byo-15-7	OK	3.69723	1.75451	-1.07538	1.78236	0.074691	0.378528	no
Glyma01g32690	Glyma01g32690	Glyma01g32690	Gm01:44229408-44236211	byo-15-0	byo-15-7	OK	7.17913	5.34364	-0.425985	0.890435	0.373233	0.790378	no
Glyma01g32750	Glyma01g32750	Glyma01g32750	Gm01:44319318-44320867	byo-15-0	byo-15-7	OK	1699.19	1797.45	0.0811033	-0.0970263	0.922706	0.985888	no
Glyma01g32760	Glyma01g32760	Glyma01g32760	Gm01:44347887-44349526	byo-15-0	byo-15-7	NOTEST	0	0	0	0	1	1	no
Glyma01g32775	Glyma01g32775	Glyma01g32775	Gm01:44353224-44356977	byo-15-0	byo-15-7	NOTEST	0.0414374	0.0233335	-0.828531	0.396262	0.691911	1	no
Glyma01g32790	Glyma01g32790	Glyma01g32790	Gm01:44365503-44368345	byo-15-0	byo-15-7	OK	2.35262	2.21577	-0.0864659	0.145907	0.883995	0.979795	no
Glyma01g32800	Glyma01g32800	Glyma01g32800	Gm01:44381434-44383734	byo-15-0	byo-15-7	NOTEST	0.440161	0.0704314	-2.64374	1.96175	0.0497911	1	no
Glyma01g32810	Glyma01g32810	Glyma01g32810	Gm01:44384412-44392444	byo-15-0	byo-15-7	NOTEST	0.409308	0.410882	0.00554006	-0.00762963	0.993912	1	no
Glyma01g32825	Glyma01g32825	Glyma01g32825	Gm01:44418267-44430426	byo-15-0	byo-15-7	NOTEST	0.138803	0.235109	0.760286	-0.732353	0.463953	1	no
Glyma01g32841	Glyma01g32841	Glyma01g32841	Gm01:44482207-44482737	byo-15-0	byo-15-7	NOTEST	0	0	0	0	1	1	no
Glyma01g32855	Glyma01g32855	Glyma01g32855	Gm01:44489898-44494310	byo-15-0	byo-15-7	NOTEST	0.0220765	0.0609273	1.46458	-0.71502	0.474597	1	no
Glyma01g32870	Glyma01g32870	Glyma01g32870	Gm01:44497093-44498739	byo-15-0	byo-15-7	OK	24.886	21.4663	-0.213266	0.432492	0.665384	0.927903	no
Glyma01g32881	Glyma01g32881	Glyma01g32881	Gm01:44501342-44502103	byo-15-0	byo-15-7	OK	2.06378	1.84726	-0.159904	0.202129	0.839816	0.969956	no
Glyma01g32890	Glyma01g32890	Glyma01g32890	Gm01:44504750-44507253	byo-15-0	byo-15-7	OK	2.07079	1.11936	-0.887503	1.12974	0.258587	0.693863	no
Glyma01g32900	Glyma01g32900	Glyma01g32900	Gm01:44534734-44540055	byo-15-0	byo-15-7	NOTEST	0	0	0	0	1	1	no
Glyma01g32920	Glyma01g32920	Glyma01g32920	Gm01:44562541-44564228	byo-15-0	byo-15-7	NOTEST	0.0817218	0.140459	0.781359	-0.494422	0.621008	1	no
Glyma01g32940	Glyma01g32940	Glyma01g32940	Gm01:44595567-44597755	byo-15-0	byo-15-7	NOTEST	0	0	0	0	1	1	no
Glyma01g32961	Glyma01g32961	Glyma01g32961	Gm01:44638341-44639787	byo-15-0	byo-15-7	NOTEST	0	0	0	0	1	1	no
Glyma01g32981	Glyma01g32981	Glyma01g32981	Gm01:44662613-44664324	byo-15-0	byo-15-7	NOTEST	0.127663	0.214019	0.745396	-0.71801	0.472751	1	no
Glyma01g33000	Glyma01g33000	Glyma01g33000	Gm01:44707383-44712370	byo-15-0	byo-15-7	NOTEST	0	0.124807	1.79769e+308	1.79769e+308	0.0680698	1	no
Glyma01g33017	Glyma01g33017	Glyma01g33017	Gm01:44713495-44722187	byo-15-0	byo-15-7	OK	4.46585	3.35281	-0.413568	0.769547	0.441569	0.830642	no
Glyma01g33034	Glyma01g33034	Glyma01g33034	Gm01:44713495-44722187	byo-15-0	byo-15-7	OK	0.822479	0.595761	-0.465245	0.307527	0.758442	0.953942	no
Glyma01g33052	Glyma01g33052	Glyma01g33052	Gm01:44724345-44725089	byo-15-0	byo-15-7	NOTEST	0	0	0	0	1	1	no
Glyma01g33070	Glyma01g33070	Glyma01g33070	Gm01:44755155-44764276	byo-15-0	byo-15-7	OK	0.494502	1.60169	1.69554	-2.09581	0.0360993	0.248085	no
Glyma01g33080	Glyma01g33080	Glyma01g33080	Gm01:44784821-44785786	byo-15-0	byo-15-7	NOTEST	0	0	0	0	1	1	no
Glyma01g33097	Glyma01g33097	Glyma01g33097	Gm01:44790872-44791190	byo-15-0	byo-15-7	NOTEST	0	0	0	0	1	1	no
Glyma01g33114	Glyma01g33114	Glyma01g33114	Gm01:44806144-44806480	byo-15-0	byo-15-7	NOTEST	0	0	0	0	1	1	no
Glyma01g33132	Glyma01g33132	Glyma01g33132	Gm01:44822529-44827918	byo-15-0	byo-15-7	NOTEST	0	0	0	0	1	1	no
Glyma01g33150	Glyma01g33150	Glyma01g33150	Gm01:44831611-44835997	byo-15-0	byo-15-7	NOTEST	0	0.0870217	1.79769e+308	1.79769e+308	0.0426367	1	no
Glyma01g33160	Glyma01g33160	Glyma01g33160	Gm01:44884977-44888493	byo-15-0	byo-15-7	NOTEST	0	0	0	0	1	1	no
Glyma01g33170	Glyma01g33170	Glyma01g33170	Gm01:44905880-44910333	byo-15-0	byo-15-7	NOTEST	0	0	0	0	1	1	no
Glyma01g33181	Glyma01g33181	Glyma01g33181	Gm01:44911452-44912574	byo-15-0	byo-15-7	NOTEST	0	0	0	0	1	1	no
Glyma01g33191	Glyma01g33191	Glyma01g33191	Gm01:44940045-44941190	byo-15-0	byo-15-7	NOTEST	0	0	0	0	1	1	no
Glyma01g33200	Glyma01g33200	Glyma01g33200	Gm01:44962980-44967133	byo-15-0	byo-15-7	OK	18.3147	14.3299	-0.353977	0.747331	0.454864	0.835624	no
Glyma01g33220	Glyma01g33220	Glyma01g33220	Gm01:44980052-44984577	byo-15-0	byo-15-7	OK	5.92031	6.55922	0.147851	-0.284342	0.776149	0.956355	no
Glyma01g33240	Glyma01g33240	Glyma01g33240	Gm01:45046813-45053379	byo-15-0	byo-15-7	OK	4.52709	6.63247	0.55096	-1.14175	0.253559	0.68926	no
Glyma01g33270	Glyma01g33270	Glyma01g33270	Gm01:45164206-45167759	byo-15-0	byo-15-7	OK	5.14653	6.82619	0.407479	-0.853869	0.393178	0.802402	no
Glyma01g33281	Glyma01g33281	Glyma01g33281	Gm01:45184472-45185139	byo-15-0	byo-15-7	NOTEST	0	0	0	0	1	1	no
Glyma01g33290	Glyma01g33290	Glyma01g33290	Gm01:45230344-45235073	byo-15-0	byo-15-7	OK	3.57021	5.8047	0.701213	-1.43232	0.152053	0.552407	no
Glyma01g33300	Glyma01g33300	Glyma01g33300	Gm01:45287112-45288519	byo-15-0	byo-15-7	NOTEST	0	0	0	0	1	1	no
Glyma01g33313	Glyma01g33313	Glyma01g33313	Gm01:45306250-45306442	byo-15-0	byo-15-7	NOTEST	0	0	0	0	1	1	no
Glyma01g33326	Glyma01g33326	Glyma01g33326	Gm01:45317460-45320741	byo-15-0	byo-15-7	NOTEST	0	0	0	0	1	1	no
Glyma01g33340	Glyma01g33340	Glyma01g33340	Gm01:45339891-45344677	byo-15-0	byo-15-7	NOTEST	0.422624	0.254092	-0.734021	0.762352	0.44585	1	no
Glyma01g33350	Glyma01g33350	Glyma01g33350	Gm01:45352146-45354813	byo-15-0	byo-15-7	NOTEST	0	0	0	0	1	1	no
Glyma01g33370	Glyma01g33370	Glyma01g33370	Gm01:45401644-45404974	byo-15-0	byo-15-7	NOTEST	0.246134	0	-1.79769e+308	-1.79769e+308	0.0233556	1	no
Glyma01g33380	Glyma01g33380	Glyma01g33380	Gm01:45433046-45455133	byo-15-0	byo-15-7	OK	2.77393	2.17145	-0.353268	0.423292	0.672082	0.931335	no
Glyma01g33420	Glyma01g33420	Glyma01g33420	Gm01:45530801-45532165	byo-15-0	byo-15-7	NOTEST	0	0.428402	1.79769e+308	1.79769e+308	0.0106797	1	no
Glyma01g33430	Glyma01g33430	Glyma01g33430	Gm01:45548731-45551079	byo-15-0	byo-15-7	NOTEST	0	0	0	0	1	1	no
Glyma01g33440	Glyma01g33440	Glyma01g33440	Gm01:45561036-45565329	byo-15-0	byo-15-7	NOTEST	0.0351075	0.0754956	1.10461	-0.734254	0.462794	1	no
Glyma01g33461	Glyma01g33461	Glyma01g33461	Gm01:45637083-45640786	byo-15-0	byo-15-7	NOTEST	0	0	0	0	1	1	no
Glyma01g33480	Glyma01g33480	Glyma01g33480	Gm01:45640951-45643255	byo-15-0	byo-15-7	NOTEST	0	0	0	0	1	1	no
Glyma01g33500	Glyma01g33500	Glyma01g33500	Gm01:45666010-45668198	byo-15-0	byo-15-7	NOTEST	0	0	0	0	1	1	no
Glyma01g33510	Glyma01g33510	Glyma01g33510	Gm01:45669204-45672362	byo-15-0	byo-15-7	NOTEST	0	0	0	0	1	1	no
Glyma01g33520	Glyma01g33520	Glyma01g33520	Gm01:45685075-45692774	byo-15-0	byo-15-7	OK	7.33857	11.24	0.615071	-1.20671	0.227546	0.6578	no
Glyma01g33560	Glyma01g33560	Glyma01g33560	Gm01:45743456-45744317	byo-15-0	byo-15-7	NOTEST	0	0	0	0	1	1	no
Glyma01g33575	Glyma01g33575	Glyma01g33575	Gm01:45782142-45782607	byo-15-0	byo-15-7	NOTEST	0	0	0	0	1	1	no
Glyma01g33590	Glyma01g33590	Glyma01g33590	Gm01:45785878-45786501	byo-15-0	byo-15-7	NOTEST	0	0	0	0	1	1	no
Glyma01g33600	Glyma01g33600	Glyma01g33600	Gm01:45786844-45790318	byo-15-0	byo-15-7	OK	4.28137	5.27655	0.301523	-0.518558	0.604069	0.906301	no
Glyma01g33610	Glyma01g33610	Glyma01g33610	Gm01:45796676-45800002	byo-15-0	byo-15-7	OK	5.7829	4.64671	-0.315584	0.60885	0.542624	0.879633	no
Glyma01g33620	Glyma01g33620	Glyma01g33620	Gm01:45803536-45806513	byo-15-0	byo-15-7	OK	0.80316	1.18308	0.558792	-0.739696	0.459485	0.838225	no
Glyma01g33635	Glyma01g33635	Glyma01g33635	Gm01:45827324-45830713	byo-15-0	byo-15-7	NOTEST	0	0	0	0	1	1	no
Glyma01g33650	Glyma01g33650	Glyma01g33650	Gm01:45852397-45854700	byo-15-0	byo-15-7	OK	2.49947	1.67479	-0.577644	1.02303	0.306293	0.736734	no
Glyma01g33660	Glyma01g33660	Glyma01g33660	Gm01:45858147-45867014	byo-15-0	byo-15-7	OK	19.4122	11.6895	-0.731747	1.53257	0.125381	0.501751	no
Glyma01g33676	Glyma01g33676	Glyma01g33676	Gm01:45892351-45898318	byo-15-0	byo-15-7	OK	1.01033	1.72239	0.769585	-1.22812	0.219402	0.64782	no
Glyma01g33692	Glyma01g33692	Glyma01g33692	Gm01:45905544-45906417	byo-15-0	byo-15-7	NOTEST	0	0	0	0	1	1	no
Glyma01g33708	Glyma01g33708	Glyma01g33708	Gm01:45911622-45912362	byo-15-0	byo-15-7	NOTEST	0	0	0	0	1	1	no
Glyma01g33724	Glyma01g33724	Glyma01g33724	Gm01:45932771-45933893	byo-15-0	byo-15-7	OK	3.42097	5.33504	0.641095	-1.14266	0.253179	0.689001	no
Glyma01g33740	Glyma01g33740	Glyma01g33740	Gm01:45948913-45964890	byo-15-0	byo-15-7	NOTEST	0	0	0	0	1	1	no
Glyma01g33761	Glyma01g33761	Glyma01g33761	Gm01:45948913-45964890	byo-15-0	byo-15-7	OK	4.01115	6.55673	0.708961	-1.32466	0.185283	0.603075	no
Glyma01g33782	Glyma01g33782	Glyma01g33782	Gm01:45948913-45964890	byo-15-0	byo-15-7	NOTEST	0	0.0971237	1.79769e+308	1.79769e+308	0.351113	1	no
Glyma01g33803	Glyma01g33803	Glyma01g33803	Gm01:45990835-45994797	byo-15-0	byo-15-7	NOTEST	0	0	0	0	1	1	no
Glyma01g33824	Glyma01g33824	Glyma01g33824	Gm01:46002247-46005198	byo-15-0	byo-15-7	NOTEST	0	0	0	0	1	1	no
Glyma01g33845	Glyma01g33845	Glyma01g33845	Gm01:46007636-46011913	byo-15-0	byo-15-7	NOTEST	0.058798	0.0336543	-0.804978	0.471524	0.637267	1	no
Glyma01g33866	Glyma01g33866	Glyma01g33866	Gm01:46043835-46074615	byo-15-0	byo-15-7	OK	4.57888	4.75012	0.052969	-0.108182	0.913851	0.984387	no
Glyma01g33888	Glyma01g33888	Glyma01g33888	Gm01:46096266-46097858	byo-15-0	byo-15-7	NOTEST	0	0	0	0	1	1	no
Glyma01g33910	Glyma01g33910	Glyma01g33910	Gm01:46103382-46104985	byo-15-0	byo-15-7	NOTEST	0.335096	0.386877	0.2073	-0.215061	0.82972	1	no
Glyma01g33920	Glyma01g33920	Glyma01g33920	Gm01:46115248-46117119	byo-15-0	byo-15-7	NOTEST	0	0	0	0	1	1	no
Glyma01g33960	Glyma01g33960	Glyma01g33960	Gm01:46237540-46239330	byo-15-0	byo-15-7	NOTEST	0	0	0	0	1	1	no
Glyma01g33986	Glyma01g33986	Glyma01g33986	Gm01:46305207-46307924	byo-15-0	byo-15-7	NOTEST	0	0.06028	1.79769e+308	1.79769e+308	0.111832	1	no
Glyma01g34013	Glyma01g34013	Glyma01g34013	Gm01:46321601-46322033	byo-15-0	byo-15-7	NOTEST	0	0	0	0	1	1	no
Glyma01g34040	Glyma01g34040	Glyma01g34040	Gm01:46325425-46325842	byo-15-0	byo-15-7	NOTEST	0	0	0	0	1	1	no
Glyma01g34060	Glyma01g34060	Glyma01g34060	Gm01:46360579-46360996	byo-15-0	byo-15-7	NOTEST	0	0	0	0	1	1	no
Glyma01g34111	Glyma01g34111	Glyma01g34111	Gm01:46405622-46406054	byo-15-0	byo-15-7	NOTEST	0	0	0	0	1	1	no
Glyma01g34160	Glyma01g34160	Glyma01g34160	Gm01:46426795-46427518	byo-15-0	byo-15-7	NOTEST	0	0	0	0	1	1	no
Glyma01g34180	Glyma01g34180	Glyma01g34180	Gm01:46434724-46435093	byo-15-0	byo-15-7	NOTEST	0	0	0	0	1	1	no
Glyma01g34210	Glyma01g34210	Glyma01g34210	Gm01:46467747-46468471	byo-15-0	byo-15-7	NOTEST	0	0	0	0	1	1	no
Glyma01g34223	Glyma01g34223	Glyma01g34223	Gm01:46519589-46520799	byo-15-0	byo-15-7	NOTEST	0	0	0	0	1	1	no
Glyma01g34236	Glyma01g34236	Glyma01g34236	Gm01:46527137-46531737	byo-15-0	byo-15-7	OK	1.90904	0.332831	-2.51999	2.98295	0.00285485	0.0488941	yes
Glyma01g34250	Glyma01g34250	Glyma01g34250	Gm01:46534521-46534953	byo-15-0	byo-15-7	NOTEST	0	0	0	0	1	1	no
Glyma01g34260	Glyma01g34260	Glyma01g34260	Gm01:46537220-46537655	byo-15-0	byo-15-7	NOTEST	0	0	0	0	1	1	no
Glyma01g34270	Glyma01g34270	Glyma01g34270	Gm01:46573515-46583536	byo-15-0	byo-15-7	OK	6.29753	5.52592	-0.188571	0.365832	0.71449	0.942455	no
Glyma01g34300	Glyma01g34300	Glyma01g34300	Gm01:46676161-46677711	byo-15-0	byo-15-7	OK	224.353	196.957	-0.187887	0.310866	0.755903	0.953717	no
Glyma01g34321	Glyma01g34321	Glyma01g34321	Gm01:46693841-46694273	byo-15-0	byo-15-7	NOTEST	0	0	0	0	1	1	no
Glyma01g34340	Glyma01g34340	Glyma01g34340	Gm01:46707889-46726051	byo-15-0	byo-15-7	NOTEST	0	0	0	0	1	1	no
Glyma01g34350	Glyma01g34350	Glyma01g34350	Gm01:46731685-46740931	byo-15-0	byo-15-7	OK	2.43455	3.06808	0.333677	-0.67206	0.501545	0.860719	no
Glyma01g34360	Glyma01g34360	Glyma01g34360	Gm01:46742637-46747004	byo-15-0	byo-15-7	OK	0.353287	0.898311	1.34637	-1.20148	0.229566	0.660312	no
Glyma01g34370	Glyma01g34370	Glyma01g34370	Gm01:46749398-46751642	byo-15-0	byo-15-7	NOTEST	0	0.163331	1.79769e+308	1.79769e+308	0.111832	1	no
Glyma01g34380	Glyma01g34380	Glyma01g34380	Gm01:46754477-46758976	byo-15-0	byo-15-7	OK	0.510991	1.57787	1.6266	-1.97212	0.0485955	0.297805	no
Glyma01g34400	Glyma01g34400	Glyma01g34400	Gm01:46763231-46763483	byo-15-0	byo-15-7	OK	2.489	2.76179	0.150038	-0.0871187	0.930577	0.98752	no
Glyma01g34410	Glyma01g34410	Glyma01g34410	Gm01:46764767-46772182	byo-15-0	byo-15-7	OK	1.91069	3.33444	0.803346	-1.25547	0.209307	0.634275	no
Glyma01g34420	Glyma01g34420	Glyma01g34420	Gm01:46787052-46789561	byo-15-0	byo-15-7	NOTEST	0	0.0672097	1.79769e+308	1.79769e+308	0.111832	1	no
Glyma01g34443	Glyma01g34443	Glyma01g34443	Gm01:46808690-46811728	byo-15-0	byo-15-7	NOTEST	0	0	0	0	1	1	no
Glyma01g34466	Glyma01g34466	Glyma01g34466	Gm01:46825911-46827713	byo-15-0	byo-15-7	NOTEST	0	0	0	0	1	1	no
Glyma01g34490	Glyma01g34490	Glyma01g34490	Gm01:46835873-46838757	byo-15-0	byo-15-7	NOTEST	0	0.045553	1.79769e+308	1.79769e+308	0.194774	1	no
Glyma01g34506	Glyma01g34506	Glyma01g34506	Gm01:46869789-46881811	byo-15-0	byo-15-7	OK	1.34159	1.79778	0.422274	-0.737344	0.460913	0.838842	no
Glyma01g34523	Glyma01g34523	Glyma01g34523	Gm01:46869789-46881811	byo-15-0	byo-15-7	NOTEST	0	0	0	0	1	1	no
Glyma01g34540	Glyma01g34540	Glyma01g34540	Gm01:46906412-46911701	byo-15-0	byo-15-7	NOTEST	0.105881	0	-1.79769e+308	-1.79769e+308	0.0512004	1	no
Glyma01g34560	Glyma01g34560	Glyma01g34560	Gm01:46925228-46938022	byo-15-0	byo-15-7	OK	1.75933	1.77489	0.0127007	-0.0218473	0.98257	0.996688	no
Glyma01g34570	Glyma01g34570	Glyma01g34570	Gm01:46940993-46942519	byo-15-0	byo-15-7	NOTEST	0.055587	0.0951064	0.774795	-0.490269	0.623944	1	no
Glyma01g34580	Glyma01g34580	Glyma01g34580	Gm01:46987337-46989392	byo-15-0	byo-15-7	NOTEST	0	0	0	0	1	1	no
Glyma01g34590	Glyma01g34590	Glyma01g34590	Gm01:46994947-47011742	byo-15-0	byo-15-7	NOTEST	0.263708	0.0466928	-2.49767	2.46663	0.013639	1	no
Glyma01g34605	Glyma01g34605	Glyma01g34605	Gm01:47017352-47017572	byo-15-0	byo-15-7	NOTEST	0	0	0	0	1	1	no
Glyma01g34620	Glyma01g34620	Glyma01g34620	Gm01:47044532-47046263	byo-15-0	byo-15-7	NOTEST	0.0868523	0.189877	1.12843	-0.750084	0.453204	1	no
Glyma01g34630	Glyma01g34630	Glyma01g34630	Gm01:47059946-47069275	byo-15-0	byo-15-7	OK	8.6787	11.7948	0.442604	-0.870266	0.384155	0.797597	no
Glyma01g34650	Glyma01g34650	Glyma01g34650	Gm01:47081810-47085604	byo-15-0	byo-15-7	NOTEST	0	0.319866	1.79769e+308	1.79769e+308	0.0447327	1	no
Glyma01g34660	Glyma01g34660	Glyma01g34660	Gm01:47090148-47094163	byo-15-0	byo-15-7	OK	19.0131	14.4932	-0.391618	0.789821	0.429632	0.823151	no
Glyma01g34671	Glyma01g34671	Glyma01g34671	Gm01:47112164-47117514	byo-15-0	byo-15-7	NOTEST	0	0	0	0	1	1	no
Glyma01g34680	Glyma01g34680	Glyma01g34680	Gm01:47129774-47133165	byo-15-0	byo-15-7	OK	2.02023	0.700918	-1.5272	1.83163	0.0670071	0.357164	no
Glyma01g34690	Glyma01g34690	Glyma01g34690	Gm01:47136977-47141477	byo-15-0	byo-15-7	OK	6.1169	8.34117	0.447451	-0.69694	0.485841	0.852743	no
Glyma01g34700	Glyma01g34700	Glyma01g34700	Gm01:47141945-47148729	byo-15-0	byo-15-7	OK	129.794	92.7916	-0.484158	0.712214	0.476333	0.847746	no
Glyma01g34710	Glyma01g34710	Glyma01g34710	Gm01:47159471-47160816	byo-15-0	byo-15-7	NOTEST	0	0	0	0	1	1	no
Glyma01g34723	Glyma01g34723	Glyma01g34723	Gm01:47186498-47195065	byo-15-0	byo-15-7	NOTEST	0	0	0	0	1	1	no
Glyma01g34736	Glyma01g34736	Glyma01g34736	Gm01:47186498-47195065	byo-15-0	byo-15-7	NOTEST	0.083547	0.067062	-0.317093	0.163596	0.870049	1	no
Glyma01g34750	Glyma01g34750	Glyma01g34750	Gm01:47186498-47195065	byo-15-0	byo-15-7	NOTEST	0	0	0	0	1	1	no
Glyma01g34760	Glyma01g34760	Glyma01g34760	Gm01:47218316-47222203	byo-15-0	byo-15-7	NOTEST	0	0	0	0	1	1	no
Glyma01g34770	Glyma01g34770	Glyma01g34770	Gm01:47223841-47226695	byo-15-0	byo-15-7	NOTEST	0	0.0738145	1.79769e+308	1.79769e+308	0.111832	1	no
Glyma01g34780	Glyma01g34780	Glyma01g34780	Gm01:47252139-47259720	byo-15-0	byo-15-7	OK	8.90026	6.96017	-0.354725	0.679942	0.496541	0.858301	no
Glyma01g34791	Glyma01g34791	Glyma01g34791	Gm01:47272202-47272649	byo-15-0	byo-15-7	NOTEST	0	0	0	0	1	1	no
Glyma01g34800	Glyma01g34800	Glyma01g34800	Gm01:47276056-47279637	byo-15-0	byo-15-7	NOTEST	0.293355	0.101851	-1.52618	1.28416	0.199085	1	no
Glyma01g34820	Glyma01g34820	Glyma01g34820	Gm01:47295116-47298579	byo-15-0	byo-15-7	OK	5.69881	8.87213	0.63862	-1.33838	0.180771	0.596914	no
Glyma01g34830	Glyma01g34830	Glyma01g34830	Gm01:47301280-47303164	byo-15-0	byo-15-7	NOTEST	0.198685	0.0899467	-1.14334	1.05334	0.292184	1	no
Glyma01g34840	Glyma01g34840	Glyma01g34840	Gm01:47306519-47315257	byo-15-0	byo-15-7	OK	4.606	4.00068	-0.203268	0.427821	0.668782	0.929669	no
Glyma01g34890	Glyma01g34890	Glyma01g34890	Gm01:47380345-47383987	byo-15-0	byo-15-7	NOTEST	0	0	0	0	1	1	no
Glyma01g34930	Glyma01g34930	Glyma01g34930	Gm01:47416768-47417287	byo-15-0	byo-15-7	OK	0.665707	0.264963	-1.3291	1.02407	0.3058	0.736259	no
Glyma01g34940	Glyma01g34940	Glyma01g34940	Gm01:47418176-47422790	byo-15-0	byo-15-7	OK	3.90639	3.10837	-0.329677	0.575279	0.565103	0.88951	no
Glyma01g34950	Glyma01g34950	Glyma01g34950	Gm01:47484620-47488243	byo-15-0	byo-15-7	NOTEST	0.0889179	0	-1.79769e+308	-1.79769e+308	0.335136	1	no
Glyma01g34960	Glyma01g34960	Glyma01g34960	Gm01:47484620-47488243	byo-15-0	byo-15-7	OK	0.742293	0.693845	-0.0973751	0.130938	0.895824	0.982148	no
Glyma01g34971	Glyma01g34971	Glyma01g34971	Gm01:47509796-47513893	byo-15-0	byo-15-7	NOTEST	0	0	0	0	1	1	no
Glyma01g34980	Glyma01g34980	Glyma01g34980	Gm01:47515002-47518685	byo-15-0	byo-15-7	OK	0.876828	6.66812	2.92691	-5.1063	3.28523e-07	4.38529e-05	yes
Glyma01g34990	Glyma01g34990	Glyma01g34990	Gm01:47519487-47522901	byo-15-0	byo-15-7	OK	0.722064	1.39367	0.948692	-1.25944	0.207871	0.632233	no
Glyma01g35010	Glyma01g35010	Glyma01g35010	Gm01:47557393-47559050	byo-15-0	byo-15-7	OK	1.61289	0.693589	-1.21749	1.70804	0.0876298	0.416358	no
Glyma01g35030	Glyma01g35030	Glyma01g35030	Gm01:47605850-47609703	byo-15-0	byo-15-7	OK	26.1273	23.6816	-0.141793	0.297232	0.766289	0.95488	no
Glyma01g35043	Glyma01g35043	Glyma01g35043	Gm01:47610784-47630469	byo-15-0	byo-15-7	OK	4.11963	3.32175	-0.310571	0.541639	0.588067	0.899349	no
Glyma01g35056	Glyma01g35056	Glyma01g35056	Gm01:47635648-47638176	byo-15-0	byo-15-7	NOTEST	0.114617	0.237885	1.05345	-1.03426	0.301012	1	no
Glyma01g35070	Glyma01g35070	Glyma01g35070	Gm01:47640057-47641838	byo-15-0	byo-15-7	NOTEST	0	0	0	0	1	1	no
Glyma01g35083	Glyma01g35083	Glyma01g35083	Gm01:47647068-47659579	byo-15-0	byo-15-7	OK	3.25121	4.60182	0.501228	-0.960118	0.336996	0.761718	no
Glyma01g35096	Glyma01g35096	Glyma01g35096	Gm01:47647068-47659579	byo-15-0	byo-15-7	OK	0.367378	0.644134	0.810096	-0.522174	0.601549	0.905326	no
Glyma01g35110	Glyma01g35110	Glyma01g35110	Gm01:47674344-47678727	byo-15-0	byo-15-7	OK	2.50884	2.76195	0.138666	-0.227807	0.819796	0.965635	no
Glyma01g35120	Glyma01g35120	Glyma01g35120	Gm01:47680344-47682544	byo-15-0	byo-15-7	NOTEST	0	0	0	0	1	1	no
Glyma01g35130	Glyma01g35130	Glyma01g35130	Gm01:47684337-47693236	byo-15-0	byo-15-7	OK	17.4949	18.2176	0.0584009	-0.119388	0.904968	0.983156	no
Glyma01g35145	Glyma01g35145	Glyma01g35145	Gm01:47696213-47700220	byo-15-0	byo-15-7	OK	1.63278	2.62721	0.686205	-1.12303	0.261426	0.696438	no
Glyma01g35160	Glyma01g35160	Glyma01g35160	Gm01:47703725-47705225	byo-15-0	byo-15-7	OK	3.46317	0.216804	-3.99763	4.77578	1.79014e-06	0.00016923	yes
Glyma01g35170	Glyma01g35170	Glyma01g35170	Gm01:47707392-47708756	byo-15-0	byo-15-7	OK	4.86252	13.1399	1.43417	-2.69349	0.00707087	0.0900198	no
Glyma01g35180	Glyma01g35180	Glyma01g35180	Gm01:47718336-47725678	byo-15-0	byo-15-7	NOTEST	0.0479791	0.112002	1.22305	-0.58289	0.559967	1	no
Glyma01g35190	Glyma01g35190	Glyma01g35190	Gm01:47727548-47732948	byo-15-0	byo-15-7	OK	31.9015	25.4092	-0.328274	0.667503	0.504451	0.862416	no
Glyma01g35201	Glyma01g35201	Glyma01g35201	Gm01:47733363-47734311	byo-15-0	byo-15-7	OK	3.71873	2.00702	-0.889754	0.802593	0.42221	0.819207	no
Glyma01g35211	Glyma01g35211	Glyma01g35211	Gm01:47738908-47740460	byo-15-0	byo-15-7	NOTEST	0	0	0	0	1	1	no
Glyma01g35220	Glyma01g35220	Glyma01g35220	Gm01:47744055-47749293	byo-15-0	byo-15-7	OK	44.5873	20.8167	-1.09889	1.97426	0.0483519	0.29724	no
Glyma01g35230	Glyma01g35230	Glyma01g35230	Gm01:47776150-47780905	byo-15-0	byo-15-7	OK	11.0675	11.8254	0.0955623	-0.198512	0.842645	0.970418	no
Glyma01g35255	Glyma01g35255	Glyma01g35255	Gm01:47796276-47802389	byo-15-0	byo-15-7	NOTEST	0.028339	0.0485375	0.77631	-0.491227	0.623266	1	no
Glyma01g35280	Glyma01g35280	Glyma01g35280	Gm01:47816224-47821828	byo-15-0	byo-15-7	OK	84.935	49.9999	-0.764434	1.51069	0.130868	0.512497	no
Glyma01g35291	Glyma01g35291	Glyma01g35291	Gm01:47825541-47831516	byo-15-0	byo-15-7	OK	0.867178	1.07065	0.304084	-0.403342	0.686697	0.935446	no
Glyma01g35300	Glyma01g35300	Glyma01g35300	Gm01:47832148-47834125	byo-15-0	byo-15-7	OK	3.06188	4.11548	0.426644	-0.737566	0.460778	0.838833	no
Glyma01g35310	Glyma01g35310	Glyma01g35310	Gm01:47838176-47839418	byo-15-0	byo-15-7	NOTEST	0	0.0304372	1.79769e+308	1.79769e+308	0.194774	1	no
Glyma01g35315	Glyma01g35315	Glyma01g35315	Gm01:47840273-47842107	byo-15-0	byo-15-7	NOTEST	0.0802848	0	-1.79769e+308	-1.79769e+308	0.124059	1	no
Glyma01g35320	Glyma01g35320	Glyma01g35320	Gm01:47843480-47846444	byo-15-0	byo-15-7	OK	10.8581	9.78511	-0.150116	0.316604	0.751544	0.95215	no
Glyma01g35330	Glyma01g35330	Glyma01g35330	Gm01:47852135-47854503	byo-15-0	byo-15-7	OK	3.52359	4.34195	0.301299	-0.592661	0.553408	0.884415	no
Glyma01g35360	Glyma01g35360	Glyma01g35360	Gm01:47868564-47871498	byo-15-0	byo-15-7	OK	20.3713	29.9399	0.555532	-1.1634	0.244668	0.679772	no
Glyma01g35370	Glyma01g35370	Glyma01g35370	Gm01:47876579-47879048	byo-15-0	byo-15-7	OK	2.15062	4.41533	1.03777	-1.88208	0.0598245	0.33592	no
Glyma01g35381	Glyma01g35381	Glyma01g35381	Gm01:47882778-47885490	byo-15-0	byo-15-7	OK	14.4014	8.85514	-0.701628	1.28913	0.197352	0.618069	no
Glyma01g35390	Glyma01g35390	Glyma01g35390	Gm01:47891482-47901268	byo-15-0	byo-15-7	OK	10.7292	9.96299	-0.106891	0.226111	0.821115	0.965714	no
Glyma01g35400	Glyma01g35400	Glyma01g35400	Gm01:47904409-47909019	byo-15-0	byo-15-7	OK	1.40645	1.14204	-0.300444	0.438993	0.660667	0.926322	no
Glyma01g35410	Glyma01g35410	Glyma01g35410	Gm01:47910023-47911708	byo-15-0	byo-15-7	NOTEST	0	0.0717423	1.79769e+308	1.79769e+308	0.0680698	1	no
Glyma01g35420	Glyma01g35420	Glyma01g35420	Gm01:47912898-47913228	byo-15-0	byo-15-7	NOTEST	0	0	0	0	1	1	no
Glyma01g35430	Glyma01g35430	Glyma01g35430	Gm01:47926149-47931104	byo-15-0	byo-15-7	NOTEST	0.0414773	0.0691295	0.73698	-0.46634	0.640972	1	no
Glyma01g35440	Glyma01g35440	Glyma01g35440	Gm01:47932186-47933647	byo-15-0	byo-15-7	NOTEST	0.110454	0.0302449	-1.86868	0.986045	0.324111	1	no
Glyma01g35450	Glyma01g35450	Glyma01g35450	Gm01:47933912-47939040	byo-15-0	byo-15-7	OK	18.6461	12.1304	-0.620243	1.30661	0.191344	0.611444	no
Glyma01g35460	Glyma01g35460	Glyma01g35460	Gm01:47946562-47947368	byo-15-0	byo-15-7	OK	3.73427	3.63067	-0.0405906	0.0603404	0.951884	0.991449	no
Glyma01g35470	Glyma01g35470	Glyma01g35470	Gm01:47950106-47953985	byo-15-0	byo-15-7	OK	0.483049	0.815724	0.75591	-0.84826	0.396293	0.804012	no
Glyma01g35480	Glyma01g35480	Glyma01g35480	Gm01:47964085-47972060	byo-15-0	byo-15-7	OK	2.84595	2.72677	-0.0617163	0.0895153	0.928672	0.987377	no
Glyma01g35490	Glyma01g35490	Glyma01g35490	Gm01:47975124-47980649	byo-15-0	byo-15-7	OK	2.75146	2.63438	-0.0627335	0.119966	0.90451	0.983156	no
Glyma01g35500	Glyma01g35500	Glyma01g35500	Gm01:47984869-47990016	byo-15-0	byo-15-7	OK	0.568023	0.765727	0.430881	-0.57865	0.562825	0.888443	no
Glyma01g35510	Glyma01g35510	Glyma01g35510	Gm01:47990548-47991258	byo-15-0	byo-15-7	OK	0.184916	0.522217	1.49778	-1.01317	0.31098	0.739997	no
Glyma01g35530	Glyma01g35530	Glyma01g35530	Gm01:48002890-48006714	byo-15-0	byo-15-7	NOTEST	0.0451643	0.0758537	0.748037	-0.473337	0.635973	1	no
Glyma01g35540	Glyma01g35540	Glyma01g35540	Gm01:48012025-48020478	byo-15-0	byo-15-7	OK	1.00023	1.833	0.873882	-1.32431	0.1854	0.603138	no
Glyma01g35551	Glyma01g35551	Glyma01g35551	Gm01:48045791-48046532	byo-15-0	byo-15-7	OK	0.175691	0.511619	1.54203	-1.0431	0.296902	0.728754	no
Glyma01g35561	Glyma01g35561	Glyma01g35561	Gm01:48046627-48048949	byo-15-0	byo-15-7	NOTEST	0.207285	0.279389	0.430656	-0.455322	0.648877	1	no
Glyma01g35570	Glyma01g35570	Glyma01g35570	Gm01:48069521-48070621	byo-15-0	byo-15-7	OK	2.90886	0.898136	-1.69545	2.11101	0.0347712	0.242696	no
Glyma01g35580	Glyma01g35580	Glyma01g35580	Gm01:48077865-48083725	byo-15-0	byo-15-7	OK	0.957682	1.00524	0.0699238	-0.0848609	0.932372	0.988028	no
Glyma01g35590	Glyma01g35590	Glyma01g35590	Gm01:48086193-48086883	byo-15-0	byo-15-7	NOTEST	0.12224	0	-1.79769e+308	-1.79769e+308	0.124059	1	no
Glyma01g35600	Glyma01g35600	Glyma01g35600	Gm01:48088646-48092573	byo-15-0	byo-15-7	OK	3.03551	4.39996	0.535554	-0.899601	0.368332	0.787399	no
Glyma01g35611	Glyma01g35611	Glyma01g35611	Gm01:48106435-48107149	byo-15-0	byo-15-7	NOTEST	0	0	0	0	1	1	no
Glyma01g35620	Glyma01g35620	Glyma01g35620	Gm01:48132072-48139955	byo-15-0	byo-15-7	OK	52.7042	7.50627	-2.81175	5.50378	3.71725e-08	6.84107e-06	yes
Glyma01g35630	Glyma01g35630	Glyma01g35630	Gm01:48142117-48144321	byo-15-0	byo-15-7	OK	0.351017	0.603115	0.780894	-0.876297	0.380869	0.795927	no
Glyma01g35640	Glyma01g35640	Glyma01g35640	Gm01:48145384-48152470	byo-15-0	byo-15-7	OK	0.566936	1.32474	1.22445	-1.7621	0.0780528	0.388092	no
Glyma01g35650	Glyma01g35650	Glyma01g35650	Gm01:48157272-48165868	byo-15-0	byo-15-7	OK	3.75184	2.50772	-0.581225	1.17345	0.240615	0.674807	no
Glyma01g35660	Glyma01g35660	Glyma01g35660	Gm01:48174704-48177832	byo-15-0	byo-15-7	OK	0.419605	1.40452	1.74298	-2.05622	0.0397612	0.264016	no
Glyma01g35671	Glyma01g35671	Glyma01g35671	Gm01:48220843-48221643	byo-15-0	byo-15-7	OK	34.9891	17.7954	-0.975398	1.92362	0.0544025	0.317671	no
Glyma01g35681	Glyma01g35681	Glyma01g35681	Gm01:48221730-48222524	byo-15-0	byo-15-7	NOTEST	0	0	0	0	1	1	no
Glyma01g35690	Glyma01g35690	Glyma01g35690	Gm01:48227988-48235632	byo-15-0	byo-15-7	OK	1.14253	1.52554	0.417085	-0.656374	0.511583	0.866271	no
Glyma01g35700	Glyma01g35700	Glyma01g35700	Gm01:48235761-48238962	byo-15-0	byo-15-7	NOTEST	0.0246265	0.097007	1.97788	-1.36692	0.171649	1	no
Glyma01g35711	Glyma01g35711	Glyma01g35711	Gm01:48242478-48244212	byo-15-0	byo-15-7	NOTEST	0	0	0	0	1	1	no
Glyma01g35720	Glyma01g35720	Glyma01g35720	Gm01:48246126-48248948	byo-15-0	byo-15-7	NOTEST	0.0596268	0.0164606	-1.85694	0.692859	0.488398	1	no
Glyma01g35730	Glyma01g35730	Glyma01g35730	Gm01:48251598-48253821	byo-15-0	byo-15-7	OK	0.245379	1.01499	2.04839	-2.12164	0.0338678	0.239956	no
Glyma01g35740	Glyma01g35740	Glyma01g35740	Gm01:48256233-48258418	byo-15-0	byo-15-7	OK	2.47973	2.93502	0.243191	-0.371101	0.710562	0.941707	no
Glyma01g35750	Glyma01g35750	Glyma01g35750	Gm01:48262136-48265375	byo-15-0	byo-15-7	OK	7.16323	7.97903	0.155604	-0.316872	0.751341	0.95215	no
Glyma01g35780	Glyma01g35780	Glyma01g35780	Gm01:48276784-48278711	byo-15-0	byo-15-7	OK	8.09552	13.4845	0.736102	-1.35081	0.176756	0.589505	no
Glyma01g35790	Glyma01g35790	Glyma01g35790	Gm01:48279936-48284217	byo-15-0	byo-15-7	OK	4.74386	6.12718	0.369162	-0.76847	0.442208	0.830767	no
Glyma01g35800	Glyma01g35800	Glyma01g35800	Gm01:48289113-48292398	byo-15-0	byo-15-7	OK	0.883842	0.637252	-0.471925	0.675842	0.499141	0.859421	no
Glyma01g35820	Glyma01g35820	Glyma01g35820	Gm01:48321786-48329293	byo-15-0	byo-15-7	OK	0.841349	0.85521	0.0235734	-0.0345619	0.972429	0.995093	no
Glyma01g35830	Glyma01g35830	Glyma01g35830	Gm01:48330613-48331119	byo-15-0	byo-15-7	OK	0.624788	0	-1.79769e+308	-1.79769e+308	0.124059	0.498897	no
Glyma01g35840	Glyma01g35840	Glyma01g35840	Gm01:48332060-48333217	byo-15-0	byo-15-7	OK	1.89348	0.984724	-0.943248	1.20572	0.227925	0.658167	no
Glyma01g35850	Glyma01g35850	Glyma01g35850	Gm01:48334976-48338851	byo-15-0	byo-15-7	OK	4.57172	4.39462	-0.0570004	0.118301	0.905829	0.983234	no
Glyma01g35880	Glyma01g35880	Glyma01g35880	Gm01:48348796-48349428	byo-15-0	byo-15-7	NOTEST	0	0	0	0	1	1	no
Glyma01g35910	Glyma01g35910	Glyma01g35910	Gm01:48361827-48364787	byo-15-0	byo-15-7	OK	115.278	426.055	1.88592	-2.60829	0.00909953	0.105795	no
Glyma01g35920	Glyma01g35920	Glyma01g35920	Gm01:48373909-48375181	byo-15-0	byo-15-7	OK	1.4203	7.73742	2.44565	-3.88536	0.000102177	0.00419803	yes
Glyma01g35931	Glyma01g35931	Glyma01g35931	Gm01:48376295-48378301	byo-15-0	byo-15-7	NOTEST	0	0	0	0	1	1	no
Glyma01g35940	Glyma01g35940	Glyma01g35940	Gm01:48378830-48383355	byo-15-0	byo-15-7	OK	1.59118	2.79202	0.811215	-1.45332	0.146136	0.541472	no
Glyma01g35950	Glyma01g35950	Glyma01g35950	Gm01:48392038-48401536	byo-15-0	byo-15-7	OK	1.66767	2.43119	0.543832	-1.05669	0.290651	0.723128	no
Glyma01g35960	Glyma01g35960	Glyma01g35960	Gm01:48412616-48415065	byo-15-0	byo-15-7	NOTEST	0	0	0	0	1	1	no
Glyma01g35970	Glyma01g35970	Glyma01g35970	Gm01:48419129-48422033	byo-15-0	byo-15-7	NOTEST	0	0	0	0	1	1	no
Glyma01g35980	Glyma01g35980	Glyma01g35980	Gm01:48422961-48427391	byo-15-0	byo-15-7	OK	0.527048	0.609574	0.209866	-0.290338	0.771558	0.955503	no
Glyma01g35990	Glyma01g35990	Glyma01g35990	Gm01:48439916-48441659	byo-15-0	byo-15-7	OK	3.18255	4.05997	0.351286	-0.598356	0.549603	0.882895	no
Glyma01g36000	Glyma01g36000	Glyma01g36000	Gm01:48442886-48447854	byo-15-0	byo-15-7	OK	1.22308	0.807306	-0.599327	0.934796	0.349893	0.770914	no
Glyma01g36011	Glyma01g36011	Glyma01g36011	Gm01:48469240-48475758	byo-15-0	byo-15-7	OK	2.00493	1.74681	-0.198826	0.309501	0.756941	0.953942	no
Glyma01g36021	Glyma01g36021	Glyma01g36021	Gm01:48476497-48478317	byo-15-0	byo-15-7	NOTEST	0	0	0	0	1	1	no
Glyma01g36030	Glyma01g36030	Glyma01g36030	Gm01:48481465-48486456	byo-15-0	byo-15-7	OK	7.54384	14.123	0.904673	-1.75963	0.0784709	0.389174	no
Glyma01g36040	Glyma01g36040	Glyma01g36040	Gm01:48503695-48509106	byo-15-0	byo-15-7	OK	1.54425	3.20866	1.05506	-1.84283	0.0653539	0.35246	no
Glyma01g36050	Glyma01g36050	Glyma01g36050	Gm01:48515192-48516090	byo-15-0	byo-15-7	NOTEST	0.200775	0.226236	0.172249	-0.141444	0.88752	1	no
Glyma01g36070	Glyma01g36070	Glyma01g36070	Gm01:48524087-48529043	byo-15-0	byo-15-7	OK	9.39078	11.372	0.276172	-0.583771	0.559375	0.887274	no
Glyma01g36080	Glyma01g36080	Glyma01g36080	Gm01:48537766-48542585	byo-15-0	byo-15-7	OK	2.74058	0.714664	-1.93914	3.06312	0.00219042	0.040966	yes
Glyma01g36091	Glyma01g36091	Glyma01g36091	Gm01:48559460-48570512	byo-15-0	byo-15-7	OK	1.49566	1.32199	-0.17807	0.255753	0.798141	0.961654	no
Glyma01g36101	Glyma01g36101	Glyma01g36101	Gm01:48579414-48580534	byo-15-0	byo-15-7	NOTEST	0	0	0	0	1	1	no
Glyma01g36110	Glyma01g36110	Glyma01g36110	Gm01:48584816-48588333	byo-15-0	byo-15-7	OK	6.40859	5.69585	-0.170094	0.357505	0.720714	0.944563	no
Glyma01g36120	Glyma01g36120	Glyma01g36120	Gm01:48599418-48603933	byo-15-0	byo-15-7	OK	5.70482	4.02095	-0.504646	0.919842	0.357655	0.777507	no
Glyma01g36130	Glyma01g36130	Glyma01g36130	Gm01:48622283-48624709	byo-15-0	byo-15-7	NOTEST	0	0	0	0	1	1	no
Glyma01g36145	Glyma01g36145	Glyma01g36145	Gm01:48632045-48636339	byo-15-0	byo-15-7	OK	1.66695	1.55383	-0.101389	0.152066	0.879135	0.978557	no
Glyma01g36160	Glyma01g36160	Glyma01g36160	Gm01:48651554-48653174	byo-15-0	byo-15-7	OK	3.81252	9.67783	1.34394	-2.65006	0.00804763	0.0981558	no
Glyma01g36170	Glyma01g36170	Glyma01g36170	Gm01:48661585-48668062	byo-15-0	byo-15-7	OK	3.24249	4.09944	0.338325	-0.655704	0.512015	0.866271	no
Glyma01g36180	Glyma01g36180	Glyma01g36180	Gm01:48677503-48687090	byo-15-0	byo-15-7	OK	4.43942	2.51874	-0.817666	1.2709	0.203764	0.627059	no
Glyma01g36190	Glyma01g36190	Glyma01g36190	Gm01:48690497-48697620	byo-15-0	byo-15-7	NOTEST	0	0.0265159	1.79769e+308	1.79769e+308	0.294596	1	no
Glyma01g36200	Glyma01g36200	Glyma01g36200	Gm01:48703010-48710116	byo-15-0	byo-15-7	OK	6.21715	5.42003	-0.197952	0.415945	0.677451	0.932168	no
Glyma01g36210	Glyma01g36210	Glyma01g36210	Gm01:48710853-48716254	byo-15-0	byo-15-7	OK	27.6549	19.8533	-0.478152	0.872332	0.383027	0.797218	no
Glyma01g36225	Glyma01g36225	Glyma01g36225	Gm01:48732011-48735191	byo-15-0	byo-15-7	OK	0.708214	0.155203	-2.19003	2.41888	0.0155685	0.14885	no
Glyma01g36240	Glyma01g36240	Glyma01g36240	Gm01:48735796-48738228	byo-15-0	byo-15-7	OK	0.685636	0.768953	0.165452	-0.230988	0.817324	0.965233	no
Glyma01g36250	Glyma01g36250	Glyma01g36250	Gm01:48740116-48740919	byo-15-0	byo-15-7	OK	0.954211	1.72515	0.854338	-0.928006	0.353405	0.773799	no
Glyma01g36260	Glyma01g36260	Glyma01g36260	Gm01:48742924-48747330	byo-15-0	byo-15-7	OK	1.14567	0.877205	-0.385204	0.570162	0.568568	0.891368	no
Glyma01g36270	Glyma01g36270	Glyma01g36270	Gm01:48751691-48754081	byo-15-0	byo-15-7	OK	5.59205	4.92962	-0.181901	0.370298	0.711161	0.941707	no
Glyma01g36280	Glyma01g36280	Glyma01g36280	Gm01:48755468-48766262	byo-15-0	byo-15-7	OK	1.41827	1.92251	0.438864	-0.812704	0.416388	0.815679	no
Glyma01g36290	Glyma01g36290	Glyma01g36290	Gm01:48768219-48769858	byo-15-0	byo-15-7	OK	3.11297	5.03087	0.692517	-0.95745	0.33834	0.762984	no
Glyma01g36301	Glyma01g36301	Glyma01g36301	Gm01:48784769-48791019	byo-15-0	byo-15-7	NOTEST	0.387844	0.44544	0.199754	-0.236909	0.812727	1	no
Glyma01g36311	Glyma01g36311	Glyma01g36311	Gm01:48803722-48809885	byo-15-0	byo-15-7	NOTEST	0	0	0	0	1	1	no
Glyma01g36320	Glyma01g36320	Glyma01g36320	Gm01:48810062-48812413	byo-15-0	byo-15-7	OK	4.99479	5.73961	0.200529	-0.326274	0.744217	0.950441	no
Glyma01g36330	Glyma01g36330	Glyma01g36330	Gm01:48812789-48816606	byo-15-0	byo-15-7	NOTEST	0	0	0	0	1	1	no
Glyma01g36340	Glyma01g36340	Glyma01g36340	Gm01:48817174-48822812	byo-15-0	byo-15-7	OK	4.3602	7.19727	0.723055	-1.49761	0.134235	0.519082	no
Glyma01g36350	Glyma01g36350	Glyma01g36350	Gm01:48822940-48825606	byo-15-0	byo-15-7	OK	0.296426	1.12232	1.92074	-2.55087	0.0107456	0.118011	no
Glyma01g36360	Glyma01g36360	Glyma01g36360	Gm01:48830588-48836103	byo-15-0	byo-15-7	NOTEST	0.131089	0.224102	0.773613	-0.745191	0.456156	1	no
Glyma01g36375	Glyma01g36375	Glyma01g36375	Gm01:48848060-48848643	byo-15-0	byo-15-7	NOTEST	0	0	0	0	1	1	no
Glyma01g36390	Glyma01g36390	Glyma01g36390	Gm01:48865791-48875859	byo-15-0	byo-15-7	OK	1.95785	1.85624	-0.0768901	0.133994	0.893408	0.981758	no
Glyma01g36410	Glyma01g36410	Glyma01g36410	Gm01:48903092-48909719	byo-15-0	byo-15-7	OK	19.4587	17.1139	-0.185247	0.38207	0.702409	0.939587	no
Glyma01g36420	Glyma01g36420	Glyma01g36420	Gm01:48925196-48933027	byo-15-0	byo-15-7	OK	0.920403	2.66307	1.53275	-2.08614	0.0369663	0.251746	no
Glyma01g36430	Glyma01g36430	Glyma01g36430	Gm01:48939588-48943055	byo-15-0	byo-15-7	OK	0.759039	0.161367	-2.23383	2.4759	0.0132901	0.133683	no
Glyma01g36440	Glyma01g36440	Glyma01g36440	Gm01:48945635-48947617	byo-15-0	byo-15-7	OK	10.0054	12.5408	0.325851	-0.688773	0.490966	0.855128	no
Glyma01g36450	Glyma01g36450	Glyma01g36450	Gm01:48961667-48971891	byo-15-0	byo-15-7	OK	4.0018	3.35706	-0.25345	0.527159	0.598083	0.903711	no
Glyma01g36460	Glyma01g36460	Glyma01g36460	Gm01:48974134-48978029	byo-15-0	byo-15-7	NOTEST	0	0	0	0	1	1	no
Glyma01g36480	Glyma01g36480	Glyma01g36480	Gm01:48987938-48990441	byo-15-0	byo-15-7	OK	19.585	33.356	0.7682	-1.61902	0.105442	0.460403	no
Glyma01g36490	Glyma01g36490	Glyma01g36490	Gm01:48994357-48995257	byo-15-0	byo-15-7	NOTEST	0	0	0	0	1	1	no
Glyma01g36500	Glyma01g36500	Glyma01g36500	Gm01:48997060-49003679	byo-15-0	byo-15-7	OK	0.532372	0.670251	0.332267	-0.46553	0.641552	0.920919	no
Glyma01g36510	Glyma01g36510	Glyma01g36510	Gm01:49007099-49008173	byo-15-0	byo-15-7	NOTEST	0.0835389	0.0459568	-0.862169	0.41235	0.680083	1	no
Glyma01g36520	Glyma01g36520	Glyma01g36520	Gm01:49010426-49011305	byo-15-0	byo-15-7	NOTEST	0	0	0	0	1	1	no
Glyma01g36530	Glyma01g36530	Glyma01g36530	Gm01:49013986-49014688	byo-15-0	byo-15-7	NOTEST	0	0	0	0	1	1	no
Glyma01g36545	Glyma01g36545	Glyma01g36545	Gm01:49022248-49027494	byo-15-0	byo-15-7	NOTEST	0	0	0	0	1	1	no
Glyma01g36560	Glyma01g36560	Glyma01g36560	Gm01:49029694-49030771	byo-15-0	byo-15-7	NOTEST	0	0	0	0	1	1	no
Glyma01g36570	Glyma01g36570	Glyma01g36570	Gm01:49038832-49039771	byo-15-0	byo-15-7	OK	0.690338	0	-1.79769e+308	-1.79769e+308	0.0102944	0.115141	no
Glyma01g36580	Glyma01g36580	Glyma01g36580	Gm01:49043808-49044992	byo-15-0	byo-15-7	NOTEST	0	0	0	0	1	1	no
Glyma01g36590	Glyma01g36590	Glyma01g36590	Gm01:49051914-49056921	byo-15-0	byo-15-7	OK	0.529793	2.22681	2.07148	-3.04987	0.00228939	0.0422023	yes
Glyma01g36600	Glyma01g36600	Glyma01g36600	Gm01:49064175-49066310	byo-15-0	byo-15-7	OK	1.49104	2.85034	0.934814	-1.38605	0.165731	0.574326	no
Glyma01g36606	Glyma01g36606	Glyma01g36606	Gm01:49068914-49070036	byo-15-0	byo-15-7	OK	0.783189	0.986031	0.332273	-0.414513	0.678499	0.932704	no
Glyma01g36613	Glyma01g36613	Glyma01g36613	Gm01:49070073-49072214	byo-15-0	byo-15-7	OK	0.405511	0.82381	1.02257	-1.17052	0.241793	0.676015	no
Glyma01g36620	Glyma01g36620	Glyma01g36620	Gm01:49074667-49077300	byo-15-0	byo-15-7	OK	146.953	229.177	0.641111	-1.15696	0.24729	0.682441	no
Glyma01g36630	Glyma01g36630	Glyma01g36630	Gm01:49084944-49093758	byo-15-0	byo-15-7	OK	2.07886	3.7686	0.858234	-1.4906	0.136068	0.522402	no
Glyma01g36638	Glyma01g36638	Glyma01g36638	Gm01:49107386-49109822	byo-15-0	byo-15-7	OK	4.59081	4.56072	-0.00948599	0.0153749	0.987733	0.99751	no
Glyma01g36646	Glyma01g36646	Glyma01g36646	Gm01:49109982-49111565	byo-15-0	byo-15-7	OK	2.46361	3.35087	0.443762	-0.563619	0.573014	0.89356	no
Glyma01g36654	Glyma01g36654	Glyma01g36654	Gm01:49113570-49119201	byo-15-0	byo-15-7	OK	2.11795	3.63337	0.778638	-0.692448	0.488656	0.854167	no
Glyma01g36662	Glyma01g36662	Glyma01g36662	Gm01:49119339-49122865	byo-15-0	byo-15-7	OK	24.0143	29.1125	0.277744	-0.56526	0.571897	0.893218	no
Glyma01g36670	Glyma01g36670	Glyma01g36670	Gm01:49124364-49127508	byo-15-0	byo-15-7	OK	7.55939	10.3055	0.447071	-0.756064	0.449611	0.833726	no
Glyma01g36680	Glyma01g36680	Glyma01g36680	Gm01:49129327-49137766	byo-15-0	byo-15-7	OK	3.29844	2.86419	-0.203658	0.400423	0.688845	0.935812	no
Glyma01g36691	Glyma01g36691	Glyma01g36691	Gm01:49144740-49145859	byo-15-0	byo-15-7	NOTEST	0.159213	0	-1.79769e+308	-1.79769e+308	0.124059	1	no
Glyma01g36700	Glyma01g36700	Glyma01g36700	Gm01:49146933-49155639	byo-15-0	byo-15-7	OK	7.215	12.2287	0.761196	-1.46334	0.143373	0.536993	no
Glyma01g36711	Glyma01g36711	Glyma01g36711	Gm01:49159187-49159524	byo-15-0	byo-15-7	OK	1.89557	1.01872	-0.895875	0.60595	0.544548	0.880631	no
Glyma01g36720	Glyma01g36720	Glyma01g36720	Gm01:49164706-49167830	byo-15-0	byo-15-7	OK	1.64486	1.79855	0.128868	-0.174968	0.861105	0.974548	no
Glyma01g36730	Glyma01g36730	Glyma01g36730	Gm01:49171301-49172211	byo-15-0	byo-15-7	OK	1.80413	1.53507	-0.232993	0.307131	0.758744	0.953942	no
Glyma01g36740	Glyma01g36740	Glyma01g36740	Gm01:49175886-49179312	byo-15-0	byo-15-7	OK	17.0329	11.7152	-0.539944	1.13396	0.25681	0.692136	no
Glyma01g36750	Glyma01g36750	Glyma01g36750	Gm01:49180569-49188788	byo-15-0	byo-15-7	OK	7.48404	18.4524	1.30192	-2.69173	0.00710828	0.090385	no
Glyma01g36760	Glyma01g36760	Glyma01g36760	Gm01:49196842-49199569	byo-15-0	byo-15-7	OK	3.56912	3.19627	-0.15918	0.225068	0.821926	0.965938	no
Glyma01g36770	Glyma01g36770	Glyma01g36770	Gm01:49207142-49211246	byo-15-0	byo-15-7	OK	4.48626	6.60855	0.558821	-1.03053	0.302764	0.733605	no
Glyma01g36780	Glyma01g36780	Glyma01g36780	Gm01:49213870-49215923	byo-15-0	byo-15-7	OK	9.28973	3.09041	-1.58784	2.79829	0.00513733	0.0723271	no
Glyma01g36790	Glyma01g36790	Glyma01g36790	Gm01:49215924-49218539	byo-15-0	byo-15-7	OK	5.8033	6.66243	0.199174	-0.293386	0.769227	0.95536	no
Glyma01g36801	Glyma01g36801	Glyma01g36801	Gm01:49220679-49225998	byo-15-0	byo-15-7	OK	3.80092	3.34738	-0.183313	0.369192	0.711985	0.941804	no
Glyma01g36810	Glyma01g36810	Glyma01g36810	Gm01:49235149-49235590	byo-15-0	byo-15-7	NOTEST	0.2891	0	-1.79769e+308	-1.79769e+308	0.124059	1	no
Glyma01g36820	Glyma01g36820	Glyma01g36820	Gm01:49253297-49254542	byo-15-0	byo-15-7	NOTEST	0	0	0	0	1	1	no
Glyma01g36831	Glyma01g36831	Glyma01g36831	Gm01:49256521-49258723	byo-15-0	byo-15-7	OK	1.8852	2.11803	0.168003	-0.247867	0.804237	0.962861	no
Glyma01g36840	Glyma01g36840	Glyma01g36840	Gm01:49263069-49265363	byo-15-0	byo-15-7	OK	1.9464	7.02023	1.85071	-3.51118	0.000446129	0.0128093	yes
Glyma01g36850	Glyma01g36850	Glyma01g36850	Gm01:49266433-49268941	byo-15-0	byo-15-7	OK	77.8152	86.4067	0.151091	-0.296164	0.767105	0.95494	no
Glyma01g36860	Glyma01g36860	Glyma01g36860	Gm01:49271742-49278414	byo-15-0	byo-15-7	OK	1.84446	3.83302	1.05528	-1.78081	0.0749427	0.379188	no
Glyma01g36870	Glyma01g36870	Glyma01g36870	Gm01:49289720-49299050	byo-15-0	byo-15-7	OK	5.94897	6.57779	0.144961	-0.30571	0.759826	0.954059	no
Glyma01g36880	Glyma01g36880	Glyma01g36880	Gm01:49300170-49302868	byo-15-0	byo-15-7	OK	13.219	15.3235	0.213129	-0.402691	0.687175	0.935446	no
Glyma01g36890	Glyma01g36890	Glyma01g36890	Gm01:49306067-49309782	byo-15-0	byo-15-7	OK	58.4034	40.2142	-0.538348	1.06421	0.287232	0.720035	no
Glyma01g36900	Glyma01g36900	Glyma01g36900	Gm01:49311611-49314379	byo-15-0	byo-15-7	NOTEST	0.141459	0.0814897	-0.795696	0.538191	0.590445	1	no
Glyma01g36920	Glyma01g36920	Glyma01g36920	Gm01:49322909-49327222	byo-15-0	byo-15-7	NOTEST	0	0	0	0	1	1	no
Glyma01g36931	Glyma01g36931	Glyma01g36931	Gm01:49327330-49331955	byo-15-0	byo-15-7	NOTEST	0.108961	0	-1.79769e+308	-1.79769e+308	0.124059	1	no
Glyma01g36940	Glyma01g36940	Glyma01g36940	Gm01:49334742-49338803	byo-15-0	byo-15-7	NOTEST	0.13078	0.112553	-0.216536	0.165237	0.868757	1	no
Glyma01g36950	Glyma01g36950	Glyma01g36950	Gm01:49340202-49347954	byo-15-0	byo-15-7	NOTEST	0.441913	0.195691	-1.17518	1.53037	0.125926	1	no
Glyma01g36960	Glyma01g36960	Glyma01g36960	Gm01:49357372-49363143	byo-15-0	byo-15-7	OK	3.0623	4.25417	0.474261	-0.917445	0.35891	0.778764	no
Glyma01g36980	Glyma01g36980	Glyma01g36980	Gm01:49366425-49374835	byo-15-0	byo-15-7	NOTEST	0.0222926	0	-1.79769e+308	-1.79769e+308	0.124059	1	no
Glyma01g36990	Glyma01g36990	Glyma01g36990	Gm01:49378227-49384148	byo-15-0	byo-15-7	OK	11.5754	10.0648	-0.201738	0.408368	0.683004	0.933799	no
Glyma01g37000	Glyma01g37000	Glyma01g37000	Gm01:49386620-49392224	byo-15-0	byo-15-7	NOTEST	0.349779	0	-1.79769e+308	-1.79769e+308	0.0092776	1	no
Glyma01g37010	Glyma01g37010	Glyma01g37010	Gm01:49392804-49394717	byo-15-0	byo-15-7	OK	13.728	11.021	-0.316869	0.645835	0.518386	0.869517	no
Glyma01g37020	Glyma01g37020	Glyma01g37020	Gm01:49402192-49404630	byo-15-0	byo-15-7	OK	11.6046	9.72866	-0.254383	0.537326	0.591042	0.900441	no
Glyma01g37031	Glyma01g37031	Glyma01g37031	Gm01:49405105-49407262	byo-15-0	byo-15-7	NOTEST	0	0	0	0	1	1	no
Glyma01g37040	Glyma01g37040	Glyma01g37040	Gm01:49421021-49423263	byo-15-0	byo-15-7	NOTEST	0.242823	0.390281	0.684605	-0.768244	0.442342	1	no
Glyma01g37051	Glyma01g37051	Glyma01g37051	Gm01:49432478-49435070	byo-15-0	byo-15-7	NOTEST	0	0	0	0	1	1	no
Glyma01g37060	Glyma01g37060	Glyma01g37060	Gm01:49439171-49440019	byo-15-0	byo-15-7	NOTEST	0	0	0	0	1	1	no
Glyma01g37080	Glyma01g37080	Glyma01g37080	Gm01:49455121-49457778	byo-15-0	byo-15-7	OK	2.66897	1.71162	-0.64092	1.21559	0.22414	0.65396	no
Glyma01g37090	Glyma01g37090	Glyma01g37090	Gm01:49471613-49473084	byo-15-0	byo-15-7	OK	5.74133	23.5179	2.0343	-4.07385	4.62427e-05	0.0022757	yes
Glyma01g37100	Glyma01g37100	Glyma01g37100	Gm01:49482623-49488331	byo-15-0	byo-15-7	OK	2.28414	3.62814	0.667577	-1.1129	0.265753	0.69976	no
Glyma01g37120	Glyma01g37120	Glyma01g37120	Gm01:49513343-49516212	byo-15-0	byo-15-7	NOTEST	0	0	0	0	1	1	no
Glyma01g37130	Glyma01g37130	Glyma01g37130	Gm01:49518056-49520062	byo-15-0	byo-15-7	NOTEST	0.114423	0.0324012	-1.82026	0.960493	0.336807	1	no
Glyma01g37136	Glyma01g37136	Glyma01g37136	Gm01:49520615-49552178	byo-15-0	byo-15-7	OK	2.49939	4.11543	0.719471	-1.48951	0.136353	0.523044	no
Glyma01g37143	Glyma01g37143	Glyma01g37143	Gm01:49520615-49552178	byo-15-0	byo-15-7	NOTEST	0	0.0773876	1.79769e+308	1.79769e+308	0.453975	1	no
Glyma01g37150	Glyma01g37150	Glyma01g37150	Gm01:49557207-49558582	byo-15-0	byo-15-7	NOTEST	0.191739	0	-1.79769e+308	-1.79769e+308	0.0315054	1	no
Glyma01g37160	Glyma01g37160	Glyma01g37160	Gm01:49559523-49562407	byo-15-0	byo-15-7	OK	3.75914	4.9504	0.397143	-0.716303	0.473805	0.84645	no
Glyma01g37180	Glyma01g37180	Glyma01g37180	Gm01:49563492-49567476	byo-15-0	byo-15-7	OK	5.05828	4.07092	-0.313294	0.589307	0.555655	0.885681	no
Glyma01g37190	Glyma01g37190	Glyma01g37190	Gm01:49585069-49586870	byo-15-0	byo-15-7	NOTEST	0	0	0	0	1	1	no
Glyma01g37200	Glyma01g37200	Glyma01g37200	Gm01:49597448-49598567	byo-15-0	byo-15-7	OK	0.586592	0	-1.79769e+308	-1.79769e+308	0.0181958	0.163596	no
Glyma01g37215	Glyma01g37215	Glyma01g37215	Gm01:49610632-49612072	byo-15-0	byo-15-7	NOTEST	0	0	0	0	1	1	no
Glyma01g37230	Glyma01g37230	Glyma01g37230	Gm01:49610632-49612072	byo-15-0	byo-15-7	NOTEST	0	0	0	0	1	1	no
Glyma01g37240	Glyma01g37240	Glyma01g37240	Gm01:49616496-49621295	byo-15-0	byo-15-7	OK	0.118061	0.500758	2.08459	-2.29524	0.0217194	0.182819	no
Glyma01g37250	Glyma01g37250	Glyma01g37250	Gm01:49624839-49626433	byo-15-0	byo-15-7	OK	78.7501	119.805	0.605335	-1.12141	0.262111	0.697185	no
Glyma01g37270	Glyma01g37270	Glyma01g37270	Gm01:49637622-49639519	byo-15-0	byo-15-7	OK	35.7229	16.1512	-1.14521	2.31902	0.0203942	0.175786	no
Glyma01g37290	Glyma01g37290	Glyma01g37290	Gm01:49639992-49643961	byo-15-0	byo-15-7	OK	6.24109	4.46137	-0.484311	0.676188	0.498921	0.859421	no
Glyma01g37296	Glyma01g37296	Glyma01g37296	Gm01:49646115-49646903	byo-15-0	byo-15-7	OK	82.1829	31.3488	-1.39043	2.61601	0.0088963	0.104418	no
Glyma01g37303	Glyma01g37303	Glyma01g37303	Gm01:49646973-49647556	byo-15-0	byo-15-7	NOTEST	0	0	0	0	1	1	no
Glyma01g37310	Glyma01g37310	Glyma01g37310	Gm01:49651805-49656854	byo-15-0	byo-15-7	NOTEST	0.168218	0.100899	-0.737416	0.599771	0.548659	1	no
Glyma01g37320	Glyma01g37320	Glyma01g37320	Gm01:49680382-49682445	byo-15-0	byo-15-7	OK	26.7377	11.1674	-1.25958	2.60757	0.00911885	0.105866	no
Glyma01g37330	Glyma01g37330	Glyma01g37330	Gm01:49688213-49691604	byo-15-0	byo-15-7	NOTEST	0.0466245	0.0375677	-0.311598	0.237778	0.812053	1	no
Glyma01g37341	Glyma01g37341	Glyma01g37341	Gm01:49698283-49706430	byo-15-0	byo-15-7	OK	8.08292	1.54541	-2.38689	4.1879	2.81553e-05	0.00154616	yes
Glyma01g37350	Glyma01g37350	Glyma01g37350	Gm01:49711599-49713520	byo-15-0	byo-15-7	NOTEST	0	0	0	0	1	1	no
Glyma01g37360	Glyma01g37360	Glyma01g37360	Gm01:49721188-49723541	byo-15-0	byo-15-7	OK	3.73469	2.91531	-0.357337	0.541533	0.58814	0.899416	no
Glyma01g37370	Glyma01g37370	Glyma01g37370	Gm01:49725132-49728656	byo-15-0	byo-15-7	OK	32.7714	20.0022	-0.712278	1.48376	0.137873	0.525947	no
Glyma01g37380	Glyma01g37380	Glyma01g37380	Gm01:49736248-49744811	byo-15-0	byo-15-7	OK	4.27642	2.75123	-0.636329	1.13664	0.255687	0.691642	no
Glyma01g37393	Glyma01g37393	Glyma01g37393	Gm01:49755262-49762118	byo-15-0	byo-15-7	OK	5.05635	3.93071	-0.363304	0.767488	0.442792	0.830851	no
Glyma01g37406	Glyma01g37406	Glyma01g37406	Gm01:49766181-49770448	byo-15-0	byo-15-7	OK	3.28426	3.09899	-0.0837699	0.164352	0.869454	0.976289	no
Glyma01g37420	Glyma01g37420	Glyma01g37420	Gm01:49772165-49778547	byo-15-0	byo-15-7	OK	1.10844	2.05299	0.889203	-1.51996	0.128521	0.508642	no
Glyma01g37430	Glyma01g37430	Glyma01g37430	Gm01:49781351-49784822	byo-15-0	byo-15-7	OK	0.237877	1.31641	2.46833	-3.28901	0.00100539	0.0234277	yes
Glyma01g37440	Glyma01g37440	Glyma01g37440	Gm01:49804689-49806831	byo-15-0	byo-15-7	NOTEST	0	0	0	0	1	1	no
Glyma01g37450	Glyma01g37450	Glyma01g37450	Gm01:49804689-49806831	byo-15-0	byo-15-7	OK	1.37467	4.36939	1.66834	-2.84322	0.00446598	0.0658298	no
Glyma01g37460	Glyma01g37460	Glyma01g37460	Gm01:49816977-49818918	byo-15-0	byo-15-7	OK	6.44914	9.1836	0.509953	-1.06861	0.285245	0.71771	no
Glyma01g37470	Glyma01g37470	Glyma01g37470	Gm01:49821773-49824393	byo-15-0	byo-15-7	NOTEST	0	0	0	0	1	1	no
Glyma01g37480	Glyma01g37480	Glyma01g37480	Gm01:49830529-49834966	byo-15-0	byo-15-7	OK	17.4031	24.2625	0.479385	-1.00863	0.313152	0.741334	no
Glyma01g37490	Glyma01g37490	Glyma01g37490	Gm01:49841544-49848877	byo-15-0	byo-15-7	OK	8.85882	5.93463	-0.577955	1.1444	0.252459	0.688346	no
Glyma01g37500	Glyma01g37500	Glyma01g37500	Gm01:49850120-49854265	byo-15-0	byo-15-7	OK	15.1055	16.0908	0.0911627	-0.189561	0.849653	0.972291	no
Glyma01g37510	Glyma01g37510	Glyma01g37510	Gm01:49858452-49865847	byo-15-0	byo-15-7	OK	0.46788	0.0411024	-3.50884	2.66915	0.00760441	0.0944916	no
Glyma01g37520	Glyma01g37520	Glyma01g37520	Gm01:49869523-49871376	byo-15-0	byo-15-7	OK	2.0792	2.32168	0.159138	-0.268184	0.788557	0.958241	no
Glyma01g37530	Glyma01g37530	Glyma01g37530	Gm01:49872196-49872388	byo-15-0	byo-15-7	NOTEST	0	0	0	0	1	1	no
Glyma01g37541	Glyma01g37541	Glyma01g37541	Gm01:49879281-49885195	byo-15-0	byo-15-7	OK	25.6078	11.7529	-1.12357	2.26249	0.0236671	0.193193	no
Glyma01g37550	Glyma01g37550	Glyma01g37550	Gm01:49885628-49888995	byo-15-0	byo-15-7	OK	171.924	137.286	-0.324584	0.624231	0.532476	0.876207	no
Glyma01g37560	Glyma01g37560	Glyma01g37560	Gm01:49891280-49893312	byo-15-0	byo-15-7	OK	7.17355	8.14992	0.184099	-0.305338	0.760109	0.954059	no
Glyma01g37571	Glyma01g37571	Glyma01g37571	Gm01:49893933-49905366	byo-15-0	byo-15-7	NOTEST	0	0.0544222	1.79769e+308	1.79769e+308	0.457885	1	no
Glyma01g37580	Glyma01g37580	Glyma01g37580	Gm01:49893933-49905366	byo-15-0	byo-15-7	OK	15.5381	22.0407	0.504364	-0.977499	0.328322	0.754533	no
Glyma01g37590	Glyma01g37590	Glyma01g37590	Gm01:49909450-49916251	byo-15-0	byo-15-7	OK	1.2899	0.46407	-1.47484	1.99644	0.0458858	0.288061	no
Glyma01g37600	Glyma01g37600	Glyma01g37600	Gm01:49942124-49946080	byo-15-0	byo-15-7	NOTEST	0	0	0	0	1	1	no
Glyma01g37610	Glyma01g37610	Glyma01g37610	Gm01:49946274-49947782	byo-15-0	byo-15-7	OK	7.25871	8.56361	0.238505	-0.396328	0.691863	0.936998	no
Glyma01g37620	Glyma01g37620	Glyma01g37620	Gm01:49949013-49952809	byo-15-0	byo-15-7	OK	1.56093	0.707234	-1.14215	1.71809	0.0857801	0.410957	no
Glyma01g37630	Glyma01g37630	Glyma01g37630	Gm01:49953469-49956749	byo-15-0	byo-15-7	NOTEST	0.0478854	0.10743	1.16573	-0.774882	0.438409	1	no
Glyma01g37640	Glyma01g37640	Glyma01g37640	Gm01:49963812-49969112	byo-15-0	byo-15-7	NOTEST	0.0948532	0	-1.79769e+308	-1.79769e+308	0.0315054	1	no
Glyma01g37650	Glyma01g37650	Glyma01g37650	Gm01:49975720-49977560	byo-15-0	byo-15-7	NOTEST	0.373363	0.0944081	-1.9836	1.91487	0.0555085	1	no
Glyma01g37670	Glyma01g37670	Glyma01g37670	Gm01:49982520-49986256	byo-15-0	byo-15-7	OK	2.33451	1.77045	-0.399008	0.701368	0.483073	0.851006	no
Glyma01g37675	Glyma01g37675	Glyma01g37675	Gm01:49992409-49993063	byo-15-0	byo-15-7	NOTEST	0	0	0	0	1	1	no
Glyma01g37680	Glyma01g37680	Glyma01g37680	Gm01:49999698-50001148	byo-15-0	byo-15-7	NOTEST	0	0	0	0	1	1	no
Glyma01g37690	Glyma01g37690	Glyma01g37690	Gm01:50011031-50012116	byo-15-0	byo-15-7	NOTEST	0	0.0398926	1.79769e+308	1.79769e+308	0.194774	1	no
Glyma01g37710	Glyma01g37710	Glyma01g37710	Gm01:50023553-50027805	byo-15-0	byo-15-7	OK	19.303	15.2084	-0.343958	0.726924	0.467273	0.842071	no
Glyma01g37720	Glyma01g37720	Glyma01g37720	Gm01:50028224-50031144	byo-15-0	byo-15-7	OK	4.47987	6.38801	0.51191	-1.02287	0.306369	0.736734	no
Glyma01g37730	Glyma01g37730	Glyma01g37730	Gm01:50039747-50044012	byo-15-0	byo-15-7	OK	4.08578	5.55112	0.442166	-0.89593	0.37029	0.788549	no
Glyma01g37750	Glyma01g37750	Glyma01g37750	Gm01:50051364-50051706	byo-15-0	byo-15-7	OK	0	1.7916	1.79769e+308	1.79769e+308	0.028347	0.215668	no
Glyma01g37760	Glyma01g37760	Glyma01g37760	Gm01:50053788-50061598	byo-15-0	byo-15-7	OK	0.993573	0.885188	-0.166642	0.305899	0.759681	0.954059	no
Glyma01g37780	Glyma01g37780	Glyma01g37780	Gm01:50066372-50070574	byo-15-0	byo-15-7	OK	19.3908	16.8374	-0.203709	0.430698	0.666688	0.928627	no
Glyma01g37790	Glyma01g37790	Glyma01g37790	Gm01:50071761-50075271	byo-15-0	byo-15-7	OK	17.3019	20.1472	0.219653	-0.441964	0.658516	0.925618	no
Glyma01g37801	Glyma01g37801	Glyma01g37801	Gm01:50076638-50080885	byo-15-0	byo-15-7	NOTEST	0	0	0	0	1	1	no
Glyma01g37810	Glyma01g37810	Glyma01g37810	Gm01:50095935-50098278	byo-15-0	byo-15-7	OK	1.3598	3.68389	1.43783	-2.26712	0.0233826	0.191481	no
Glyma01g37820	Glyma01g37820	Glyma01g37820	Gm01:50121728-50127532	byo-15-0	byo-15-7	NOTEST	0	0.161346	1.79769e+308	1.79769e+308	0.028347	1	no
Glyma01g37840	Glyma01g37840	Glyma01g37840	Gm01:50130998-50133253	byo-15-0	byo-15-7	NOTEST	0	0.0725886	1.79769e+308	1.79769e+308	0.111832	1	no
Glyma01g37850	Glyma01g37850	Glyma01g37850	Gm01:50135076-50137305	byo-15-0	byo-15-7	OK	0.518915	0.261743	-0.987347	1.05746	0.2903	0.723122	no
Glyma01g37860	Glyma01g37860	Glyma01g37860	Gm01:50141791-50144442	byo-15-0	byo-15-7	OK	2.01209	1.74739	-0.203488	0.327231	0.743493	0.950358	no
Glyma01g37870	Glyma01g37870	Glyma01g37870	Gm01:50146983-50150059	byo-15-0	byo-15-7	OK	28.5667	23.0404	-0.310165	0.619487	0.535596	0.877663	no
Glyma01g37880	Glyma01g37880	Glyma01g37880	Gm01:50151986-50153270	byo-15-0	byo-15-7	NOTEST	0	0	0	0	1	1	no
Glyma01g37890	Glyma01g37890	Glyma01g37890	Gm01:50153494-50155300	byo-15-0	byo-15-7	OK	2.73867	3.51843	0.361456	-0.63661	0.524379	0.872895	no
Glyma01g37900	Glyma01g37900	Glyma01g37900	Gm01:50155332-50163097	byo-15-0	byo-15-7	OK	229.894	121.05	-0.92537	1.54603	0.122098	0.496603	no
Glyma01g37910	Glyma01g37910	Glyma01g37910	Gm01:50155332-50163097	byo-15-0	byo-15-7	OK	5.55906	5.89526	0.0847152	-0.0364006	0.970963	0.994656	no
Glyma01g37920	Glyma01g37920	Glyma01g37920	Gm01:50155332-50163097	byo-15-0	byo-15-7	NOTEST	0.160281	0.11109	-0.528881	0.0304214	0.975731	1	no
Glyma01g37930	Glyma01g37930	Glyma01g37930	Gm01:50166501-50169549	byo-15-0	byo-15-7	OK	0.785336	0.159542	-2.29938	2.62553	0.00865152	0.102713	no
Glyma01g37940	Glyma01g37940	Glyma01g37940	Gm01:50177417-50180805	byo-15-0	byo-15-7	OK	7.13428	6.60429	-0.111364	0.231805	0.81669	0.965233	no
Glyma01g37950	Glyma01g37950	Glyma01g37950	Gm01:50182416-50188946	byo-15-0	byo-15-7	OK	2.24121	3.81011	0.765552	-1.48896	0.136497	0.523148	no
Glyma01g37961	Glyma01g37961	Glyma01g37961	Gm01:50206805-50209153	byo-15-0	byo-15-7	NOTEST	0	0	0	0	1	1	no
Glyma01g37970	Glyma01g37970	Glyma01g37970	Gm01:50210431-50216350	byo-15-0	byo-15-7	OK	0.871482	4.00513	2.20031	-3.70167	0.000214184	0.00740997	yes
Glyma01g37980	Glyma01g37980	Glyma01g37980	Gm01:50217118-50219743	byo-15-0	byo-15-7	NOTEST	0	0	0	0	1	1	no
Glyma01g37993	Glyma01g37993	Glyma01g37993	Gm01:50222810-50223758	byo-15-0	byo-15-7	OK	0.817242	0.153008	-2.41715	2.37007	0.0177847	0.161819	no
Glyma01g38006	Glyma01g38006	Glyma01g38006	Gm01:50230283-50235022	byo-15-0	byo-15-7	NOTEST	0	0	0	0	1	1	no
Glyma01g38020	Glyma01g38020	Glyma01g38020	Gm01:50230283-50235022	byo-15-0	byo-15-7	LOWDATA	0	0	0	0	1	1	no
Glyma01g38040	Glyma01g38040	Glyma01g38040	Gm01:50244376-50247091	byo-15-0	byo-15-7	NOTEST	0	0	0	0	1	1	no
Glyma01g38050	Glyma01g38050	Glyma01g38050	Gm01:50251094-50252088	byo-15-0	byo-15-7	NOTEST	0	0	0	0	1	1	no
Glyma01g38060	Glyma01g38060	Glyma01g38060	Gm01:50253664-50255929	byo-15-0	byo-15-7	NOTEST	0	0	0	0	1	1	no
Glyma01g38070	Glyma01g38070	Glyma01g38070	Gm01:50257294-50261107	byo-15-0	byo-15-7	OK	5.77937	7.61669	0.398253	-0.748468	0.454178	0.835236	no
Glyma01g38080	Glyma01g38080	Glyma01g38080	Gm01:50257294-50261107	byo-15-0	byo-15-7	NOTEST	0.225501	0.440023	0.964444	-0.0646327	0.948466	1	no
Glyma01g38090	Glyma01g38090	Glyma01g38090	Gm01:50261440-50263777	byo-15-0	byo-15-7	OK	2.90675	4.30279	0.565864	-1.05453	0.291642	0.724355	no
Glyma01g38105	Glyma01g38105	Glyma01g38105	Gm01:50271874-50276395	byo-15-0	byo-15-7	NOTEST	0.0563708	0.0930783	0.723498	-0.528727	0.596995	1	no
Glyma01g38120	Glyma01g38120	Glyma01g38120	Gm01:50277040-50282069	byo-15-0	byo-15-7	OK	15.3824	24.7279	0.68486	-1.40948	0.158694	0.563809	no
Glyma01g38130	Glyma01g38130	Glyma01g38130	Gm01:50286808-50291347	byo-15-0	byo-15-7	OK	1.23021	1.42818	0.215273	-0.317609	0.750782	0.952135	no
Glyma01g38150	Glyma01g38150	Glyma01g38150	Gm01:50297901-50304459	byo-15-0	byo-15-7	OK	1.11579	0.830864	-0.425376	0.655916	0.511878	0.866271	no
Glyma01g38165	Glyma01g38165	Glyma01g38165	Gm01:50306261-50309677	byo-15-0	byo-15-7	OK	2.764	3.08696	0.15943	-0.231427	0.816983	0.965233	no
Glyma01g38180	Glyma01g38180	Glyma01g38180	Gm01:50334433-50339882	byo-15-0	byo-15-7	OK	1.49422	1.05157	-0.506846	0.736102	0.461669	0.839045	no
Glyma01g38190	Glyma01g38190	Glyma01g38190	Gm01:50334433-50339882	byo-15-0	byo-15-7	OK	0.684826	0.303713	-1.17303	0.501164	0.616256	0.910882	no
Glyma01g38200	Glyma01g38200	Glyma01g38200	Gm01:50344732-50351525	byo-15-0	byo-15-7	OK	22.9106	18.387	-0.317328	0.651051	0.515014	0.867402	no
Glyma01g38211	Glyma01g38211	Glyma01g38211	Gm01:50359266-50363158	byo-15-0	byo-15-7	OK	287.694	239.011	-0.267459	0.306422	0.759283	0.953974	no
Glyma01g38220	Glyma01g38220	Glyma01g38220	Gm01:50366968-50368330	byo-15-0	byo-15-7	OK	1.5134	0.493802	-1.61579	1.97297	0.0484994	0.297655	no
Glyma01g38230	Glyma01g38230	Glyma01g38230	Gm01:50369093-50373219	byo-15-0	byo-15-7	OK	9.62415	6.37179	-0.59496	1.1361	0.255917	0.691759	no
Glyma01g38240	Glyma01g38240	Glyma01g38240	Gm01:50382617-50389821	byo-15-0	byo-15-7	OK	3.5312	2.96476	-0.252241	0.50955	0.610367	0.908456	no
Glyma01g38250	Glyma01g38250	Glyma01g38250	Gm01:50392826-50393355	byo-15-0	byo-15-7	NOTEST	0	0	0	0	1	1	no
Glyma01g38260	Glyma01g38260	Glyma01g38260	Gm01:50394489-50396439	byo-15-0	byo-15-7	OK	1.46086	1.41486	-0.0461635	0.0579957	0.953752	0.991449	no
Glyma01g38270	Glyma01g38270	Glyma01g38270	Gm01:50396914-50399570	byo-15-0	byo-15-7	OK	1.94753	2.02089	0.0533471	-0.0757833	0.939592	0.989335	no
Glyma01g38280	Glyma01g38280	Glyma01g38280	Gm01:50400416-50410022	byo-15-0	byo-15-7	OK	0.319176	3.10714	3.28316	-5.06054	4.18076e-07	5.44059e-05	yes
Glyma01g38285	Glyma01g38285	Glyma01g38285	Gm01:50429282-50431539	byo-15-0	byo-15-7	NOTEST	0	0	0	0	1	1	no
Glyma01g38290	Glyma01g38290	Glyma01g38290	Gm01:50444755-50448681	byo-15-0	byo-15-7	OK	7.55956	7.87114	0.0582705	-0.123158	0.901982	0.982634	no
Glyma01g38305	Glyma01g38305	Glyma01g38305	Gm01:50449917-50454973	byo-15-0	byo-15-7	OK	2.03249	2.66418	0.390445	-0.728668	0.466205	0.841404	no
Glyma01g38320	Glyma01g38320	Glyma01g38320	Gm01:50456603-50460237	byo-15-0	byo-15-7	OK	15.1717	21.9331	0.531732	-1.04868	0.294325	0.726471	no
Glyma01g38330	Glyma01g38330	Glyma01g38330	Gm01:50462526-50464658	byo-15-0	byo-15-7	OK	2.64838	3.12502	0.23876	-0.338279	0.735153	0.948131	no
Glyma01g38340	Glyma01g38340	Glyma01g38340	Gm01:50465731-50468463	byo-15-0	byo-15-7	NOTEST	0	0.0274124	1.79769e+308	1.79769e+308	0.111832	1	no
Glyma01g38350	Glyma01g38350	Glyma01g38350	Gm01:50468718-50471279	byo-15-0	byo-15-7	NOTEST	0.122451	0.382302	1.6425	-1.48984	0.136267	1	no
Glyma01g38360	Glyma01g38360	Glyma01g38360	Gm01:50481849-50484062	byo-15-0	byo-15-7	OK	5.62628	8.99063	0.676242	-1.42098	0.155324	0.558676	no
Glyma01g38370	Glyma01g38370	Glyma01g38370	Gm01:50487836-50491942	byo-15-0	byo-15-7	OK	12.2456	10.5686	-0.212482	0.417634	0.676215	0.932019	no
Glyma01g38381	Glyma01g38381	Glyma01g38381	Gm01:50492109-50499655	byo-15-0	byo-15-7	OK	0.0380508	0.545006	3.84027	-1.9341	0.0531007	0.3123	no
Glyma01g38390	Glyma01g38390	Glyma01g38390	Gm01:50502781-50505172	byo-15-0	byo-15-7	NOTEST	0	0	0	0	1	1	no
Glyma01g38400	Glyma01g38400	Glyma01g38400	Gm01:50522426-50525037	byo-15-0	byo-15-7	OK	2.81081	1.95155	-0.526363	0.915653	0.359849	0.779649	no
Glyma01g38410	Glyma01g38410	Glyma01g38410	Gm01:50528621-50536566	byo-15-0	byo-15-7	OK	15.7745	22.6348	0.520947	-0.989351	0.322491	0.749215	no
Glyma01g38430	Glyma01g38430	Glyma01g38430	Gm01:50543383-50544862	byo-15-0	byo-15-7	NOTEST	0	0.0234193	1.79769e+308	1.79769e+308	0.194774	1	no
Glyma01g38450	Glyma01g38450	Glyma01g38450	Gm01:50549840-50551564	byo-15-0	byo-15-7	OK	18.43	20.0435	0.121077	-0.251386	0.801515	0.962413	no
Glyma01g38460	Glyma01g38460	Glyma01g38460	Gm01:50559469-50563981	byo-15-0	byo-15-7	OK	2.43208	2.7325	0.168031	-0.29188	0.770378	0.95536	no
Glyma01g38470	Glyma01g38470	Glyma01g38470	Gm01:50564247-50567428	byo-15-0	byo-15-7	OK	52.8145	55.2037	0.06383	-0.124028	0.901293	0.982627	no
Glyma01g38481	Glyma01g38481	Glyma01g38481	Gm01:50571005-50572016	byo-15-0	byo-15-7	NOTEST	0.282895	0.275489	-0.0382696	0.0371803	0.970341	1	no
Glyma01g38490	Glyma01g38490	Glyma01g38490	Gm01:50575585-50578085	byo-15-0	byo-15-7	OK	0.984546	0.783497	-0.32953	0.445199	0.656176	0.924879	no
Glyma01g38500	Glyma01g38500	Glyma01g38500	Gm01:50580026-50582631	byo-15-0	byo-15-7	OK	3.63669	0.485986	-2.90364	4.17888	2.92943e-05	0.00159285	yes
Glyma01g38510	Glyma01g38510	Glyma01g38510	Gm01:50585499-50587165	byo-15-0	byo-15-7	OK	8.03822	5.45666	-0.558857	1.07565	0.282084	0.714926	no
Glyma01g38520	Glyma01g38520	Glyma01g38520	Gm01:50595299-50597560	byo-15-0	byo-15-7	OK	1.18224	2.45972	1.05697	-1.75308	0.0795883	0.392976	no
Glyma01g38530	Glyma01g38530	Glyma01g38530	Gm01:50601604-50607434	byo-15-0	byo-15-7	NOTEST	0	0	0	0	1	1	no
Glyma01g38540	Glyma01g38540	Glyma01g38540	Gm01:50612385-50613848	byo-15-0	byo-15-7	NOTEST	0	0	0	0	1	1	no
Glyma01g38550	Glyma01g38550	Glyma01g38550	Gm01:50621610-50624263	byo-15-0	byo-15-7	NOTEST	0	0	0	0	1	1	no
Glyma01g38560	Glyma01g38560	Glyma01g38560	Gm01:50625695-50629374	byo-15-0	byo-15-7	NOTEST	0.161349	0.226944	0.492153	-0.579425	0.562302	1	no
Glyma01g38570	Glyma01g38570	Glyma01g38570	Gm01:50630573-50632809	byo-15-0	byo-15-7	OK	0.269254	0.626854	1.21916	-1.40449	0.160173	0.566327	no
Glyma01g38580	Glyma01g38580	Glyma01g38580	Gm01:50633743-50644902	byo-15-0	byo-15-7	OK	0.569594	0.649248	0.188836	-0.277646	0.781284	0.956927	no
Glyma01g38590	Glyma01g38590	Glyma01g38590	Gm01:50645459-50648060	byo-15-0	byo-15-7	OK	16.3125	7.91234	-1.0438	2.18567	0.0288396	0.21787	no
Glyma01g38600	Glyma01g38600	Glyma01g38600	Gm01:50652785-50654854	byo-15-0	byo-15-7	OK	1.33191	0.821582	-0.69702	0.977202	0.328469	0.75462	no
Glyma01g38610	Glyma01g38610	Glyma01g38610	Gm01:50657110-50660265	byo-15-0	byo-15-7	NOTEST	0	0.0239503	1.79769e+308	1.79769e+308	0.194774	1	no
Glyma01g38630	Glyma01g38630	Glyma01g38630	Gm01:50667181-50669294	byo-15-0	byo-15-7	NOTEST	0	0.0750957	1.79769e+308	1.79769e+308	0.0680698	1	no
Glyma01g38640	Glyma01g38640	Glyma01g38640	Gm01:50682059-50689940	byo-15-0	byo-15-7	OK	7.03616	7.61357	0.113786	-0.230938	0.817363	0.965233	no
Glyma01g38650	Glyma01g38650	Glyma01g38650	Gm01:50714207-50721679	byo-15-0	byo-15-7	OK	20.0236	23.7071	0.243615	-0.477424	0.63306	0.918644	no
Glyma01g38660	Glyma01g38660	Glyma01g38660	Gm01:50733266-50737661	byo-15-0	byo-15-7	OK	0.623415	0.657792	0.0774379	-0.105894	0.915666	0.984904	no
Glyma01g38671	Glyma01g38671	Glyma01g38671	Gm01:50746604-50760836	byo-15-0	byo-15-7	OK	1.16555	1.10414	-0.0780933	0.135077	0.892551	0.981719	no
Glyma01g38680	Glyma01g38680	Glyma01g38680	Gm01:50767560-50772744	byo-15-0	byo-15-7	OK	1.20613	1.18069	-0.030757	0.0494489	0.960562	0.992492	no
Glyma01g38683	Glyma01g38683	Glyma01g38683	Gm01:50776465-50776986	byo-15-0	byo-15-7	NOTEST	0	0	0	0	1	1	no
Glyma01g38686	Glyma01g38686	Glyma01g38686	Gm01:50778421-50779180	byo-15-0	byo-15-7	NOTEST	0	0	0	0	1	1	no
Glyma01g38690	Glyma01g38690	Glyma01g38690	Gm01:50779484-50780771	byo-15-0	byo-15-7	NOTEST	0.107589	0	-1.79769e+308	-1.79769e+308	0.0512004	1	no
Glyma01g38710	Glyma01g38710	Glyma01g38710	Gm01:50784350-50784782	byo-15-0	byo-15-7	OK	0.734082	2.27209	1.63001	-1.65874	0.0971675	0.440293	no
Glyma01g38720	Glyma01g38720	Glyma01g38720	Gm01:50799865-50800659	byo-15-0	byo-15-7	NOTEST	0.0922925	0.0481705	-0.938064	0.448649	0.653685	1	no
Glyma01g38730	Glyma01g38730	Glyma01g38730	Gm01:50805196-50807200	byo-15-0	byo-15-7	OK	0.0847832	0.59671	2.81518	-2.69011	0.0071429	0.090677	no
Glyma01g38740	Glyma01g38740	Glyma01g38740	Gm01:50808925-50811172	byo-15-0	byo-15-7	OK	1.64768	1.50208	-0.133477	0.16915	0.865679	0.975732	no
Glyma01g38750	Glyma01g38750	Glyma01g38750	Gm01:50813274-50815197	byo-15-0	byo-15-7	OK	1112.88	1037.18	-0.101629	0.115108	0.908359	0.98351	no
Glyma01g38760	Glyma01g38760	Glyma01g38760	Gm01:50816662-50817396	byo-15-0	byo-15-7	OK	0.778334	1.48285	0.929917	-0.811392	0.417141	0.816041	no
Glyma01g38770	Glyma01g38770	Glyma01g38770	Gm01:50817872-50819939	byo-15-0	byo-15-7	OK	4.3275	10.3439	1.25718	-2.20637	0.0273578	0.211384	no
Glyma01g38780	Glyma01g38780	Glyma01g38780	Gm01:50823650-50825788	byo-15-0	byo-15-7	NOTEST	0	0.417802	1.79769e+308	1.79769e+308	0.00777164	1	no
Glyma01g38800	Glyma01g38800	Glyma01g38800	Gm01:50835383-50838753	byo-15-0	byo-15-7	OK	7.53401	11.9353	0.663746	-1.39802	0.162107	0.568294	no
Glyma01g38830	Glyma01g38830	Glyma01g38830	Gm01:50842944-50844670	byo-15-0	byo-15-7	NOTEST	0	0	0	0	1	1	no
Glyma01g38840	Glyma01g38840	Glyma01g38840	Gm01:50846296-50851361	byo-15-0	byo-15-7	OK	2.41324	4.04121	0.743814	-1.3824	0.16685	0.575765	no
Glyma01g38850	Glyma01g38850	Glyma01g38850	Gm01:50852873-50855077	byo-15-0	byo-15-7	NOTEST	0	0.0637595	1.79769e+308	1.79769e+308	0.111832	1	no
Glyma01g38860	Glyma01g38860	Glyma01g38860	Gm01:50858802-50861902	byo-15-0	byo-15-7	NOTEST	0.0431502	0.0471844	0.128941	-0.074869	0.940319	1	no
Glyma01g38870	Glyma01g38870	Glyma01g38870	Gm01:50865163-50867505	byo-15-0	byo-15-7	NOTEST	0.0334496	0.0576779	0.78603	-0.497378	0.618923	1	no
Glyma01g38880	Glyma01g38880	Glyma01g38880	Gm01:50879358-50885115	byo-15-0	byo-15-7	OK	2.51251	3.38848	0.431508	-0.773823	0.439036	0.829811	no
Glyma01g38890	Glyma01g38890	Glyma01g38890	Gm01:50885116-50891376	byo-15-0	byo-15-7	OK	2.15955	2.81445	0.382127	-0.756102	0.449588	0.833726	no
Glyma01g38900	Glyma01g38900	Glyma01g38900	Gm01:50896720-50898557	byo-15-0	byo-15-7	NOTEST	0	0.0205719	1.79769e+308	1.79769e+308	0.194774	1	no
Glyma01g38905	Glyma01g38905	Glyma01g38905	Gm01:50904042-50904806	byo-15-0	byo-15-7	NOTEST	0	0	0	0	1	1	no
Glyma01g38910	Glyma01g38910	Glyma01g38910	Gm01:50905481-50907657	byo-15-0	byo-15-7	OK	1.69188	3.5024	1.04972	-1.58349	0.113309	0.475692	no
Glyma01g38920	Glyma01g38920	Glyma01g38920	Gm01:50914354-50920765	byo-15-0	byo-15-7	OK	0.696892	0.741738	0.0899752	-0.127353	0.898661	0.982593	no
Glyma01g38930	Glyma01g38930	Glyma01g38930	Gm01:50921917-50923972	byo-15-0	byo-15-7	OK	71.3052	94.974	0.413525	-0.800794	0.423251	0.820105	no
Glyma01g38940	Glyma01g38940	Glyma01g38940	Gm01:50926261-50927303	byo-15-0	byo-15-7	OK	250.34	168.465	-0.571443	1.01259	0.311258	0.740026	no
Glyma01g38950	Glyma01g38950	Glyma01g38950	Gm01:50927363-50936118	byo-15-0	byo-15-7	OK	15.0163	9.22689	-0.702612	1.38279	0.166728	0.575737	no
Glyma01g38970	Glyma01g38970	Glyma01g38970	Gm01:50951026-50952807	byo-15-0	byo-15-7	OK	0.361591	0.556924	0.623121	-0.738026	0.460499	0.838796	no
Glyma01g38980	Glyma01g38980	Glyma01g38980	Gm01:50956636-50960580	byo-15-0	byo-15-7	OK	1.30146	1.58417	0.283588	-0.452538	0.650882	0.923707	no
Glyma01g38990	Glyma01g38990	Glyma01g38990	Gm01:50965004-50966084	byo-15-0	byo-15-7	NOTEST	0.139215	0	-1.79769e+308	-1.79769e+308	0.124059	1	no
Glyma01g39000	Glyma01g39000	Glyma01g39000	Gm01:50968054-50971842	byo-15-0	byo-15-7	OK	0.572306	0.958115	0.74341	-1.07465	0.28253	0.715202	no
Glyma01g39010	Glyma01g39010	Glyma01g39010	Gm01:50973225-50978011	byo-15-0	byo-15-7	OK	0.837217	1.21423	0.536367	-0.859397	0.390122	0.800397	no
Glyma01g39020	Glyma01g39020	Glyma01g39020	Gm01:50978689-50990291	byo-15-0	byo-15-7	OK	3.59719	4.59225	0.352329	-0.62116	0.534495	0.877151	no
Glyma01g39030	Glyma01g39030	Glyma01g39030	Gm01:50993362-50998484	byo-15-0	byo-15-7	OK	7.24183	7.98191	0.14038	-0.25841	0.796091	0.960882	no
Glyma01g39040	Glyma01g39040	Glyma01g39040	Gm01:51015839-51018131	byo-15-0	byo-15-7	OK	1.51958	1.56238	0.0400707	-0.0626726	0.950027	0.991266	no
Glyma01g39050	Glyma01g39050	Glyma01g39050	Gm01:51020378-51026936	byo-15-0	byo-15-7	OK	2.10572	3.02503	0.522634	-0.934247	0.350176	0.771003	no
Glyma01g39060	Glyma01g39060	Glyma01g39060	Gm01:51032159-51036122	byo-15-0	byo-15-7	NOTEST	0	0	0	0	1	1	no
Glyma01g39071	Glyma01g39071	Glyma01g39071	Gm01:51054324-51059649	byo-15-0	byo-15-7	NOTEST	0	0	0	0	1	1	no
Glyma01g39080	Glyma01g39080	Glyma01g39080	Gm01:51065275-51067178	byo-15-0	byo-15-7	NOTEST	0	0	0	0	1	1	no
Glyma01g39090	Glyma01g39090	Glyma01g39090	Gm01:51073678-51079219	byo-15-0	byo-15-7	OK	1.67252	0.758727	-1.14037	1.80436	0.0711753	0.368949	no
Glyma01g39100	Glyma01g39100	Glyma01g39100	Gm01:51080529-51083731	byo-15-0	byo-15-7	OK	1.64523	2.14685	0.383938	-0.631172	0.527928	0.873821	no
Glyma01g39110	Glyma01g39110	Glyma01g39110	Gm01:51090471-51105666	byo-15-0	byo-15-7	OK	0.479182	0.351709	-0.446191	0.575673	0.564836	0.889405	no
Glyma01g39120	Glyma01g39120	Glyma01g39120	Gm01:51105888-51110702	byo-15-0	byo-15-7	OK	16.1887	19.6881	0.282343	-0.460522	0.645142	0.921949	no
Glyma01g39141	Glyma01g39141	Glyma01g39141	Gm01:51125197-51131131	byo-15-0	byo-15-7	OK	2.85865	3.043	0.0901599	-0.184017	0.854	0.973678	no
Glyma01g39160	Glyma01g39160	Glyma01g39160	Gm01:51146769-51147427	byo-15-0	byo-15-7	NOTEST	0	0	0	0	1	1	no
Glyma01g39170	Glyma01g39170	Glyma01g39170	Gm01:51153265-51154075	byo-15-0	byo-15-7	NOTEST	0	0	0	0	1	1	no
Glyma01g39180	Glyma01g39180	Glyma01g39180	Gm01:51160065-51160350	byo-15-0	byo-15-7	NOTEST	0	0	0	0	1	1	no
Glyma01g39190	Glyma01g39190	Glyma01g39190	Gm01:51164315-51168296	byo-15-0	byo-15-7	OK	0.688745	1.02289	0.570612	-0.586625	0.557455	0.886442	no
Glyma01g39200	Glyma01g39200	Glyma01g39200	Gm01:51176939-51182827	byo-15-0	byo-15-7	OK	84.6382	48.9121	-0.791119	1.52775	0.126576	0.504519	no
Glyma01g39220	Glyma01g39220	Glyma01g39220	Gm01:51195447-51198098	byo-15-0	byo-15-7	OK	1.44747	1.32736	-0.124975	0.194874	0.845492	0.970794	no
Glyma01g39230	Glyma01g39230	Glyma01g39230	Gm01:51207026-51208664	byo-15-0	byo-15-7	NOTEST	0	0.0767787	1.79769e+308	1.79769e+308	0.111832	1	no
Glyma01g39240	Glyma01g39240	Glyma01g39240	Gm01:51218796-51220209	byo-15-0	byo-15-7	OK	11.1043	8.03207	-0.467277	0.937397	0.348555	0.770087	no
Glyma01g39250	Glyma01g39250	Glyma01g39250	Gm01:51223239-51226456	byo-15-0	byo-15-7	OK	10.1009	9.69897	-0.0585747	0.0923881	0.92639	0.986833	no
Glyma01g39260	Glyma01g39260	Glyma01g39260	Gm01:51227462-51229777	byo-15-0	byo-15-7	OK	1.91395	3.02464	0.660211	-1.13328	0.257097	0.692315	no
Glyma01g39270	Glyma01g39270	Glyma01g39270	Gm01:51234092-51236207	byo-15-0	byo-15-7	OK	50.1692	64.2394	0.356657	-0.682725	0.494781	0.85726	no
Glyma01g39280	Glyma01g39280	Glyma01g39280	Gm01:51241780-51246700	byo-15-0	byo-15-7	OK	13.8417	16.6397	0.265609	-0.556145	0.578112	0.894922	no
Glyma01g39290	Glyma01g39290	Glyma01g39290	Gm01:51259529-51261619	byo-15-0	byo-15-7	OK	3.61709	2.76123	-0.389517	0.740991	0.458699	0.837683	no
Glyma01g39300	Glyma01g39300	Glyma01g39300	Gm01:51273336-51279506	byo-15-0	byo-15-7	OK	1.71225	0	-1.79769e+308	-1.79769e+308	0.172791	0.584198	no
Glyma01g39306	Glyma01g39306	Glyma01g39306	Gm01:51273336-51279506	byo-15-0	byo-15-7	NOTEST	0	0	0	0	1	1	no
Glyma01g39313	Glyma01g39313	Glyma01g39313	Gm01:51280851-51284021	byo-15-0	byo-15-7	NOTEST	0.181942	0	-1.79769e+308	-1.79769e+308	0.0512004	1	no
Glyma01g39320	Glyma01g39320	Glyma01g39320	Gm01:51287475-51290552	byo-15-0	byo-15-7	OK	4.20247	2.73629	-0.619018	1.1365	0.255746	0.691642	no
Glyma01g39330	Glyma01g39330	Glyma01g39330	Gm01:51290922-51295650	byo-15-0	byo-15-7	OK	11.0335	13.5451	0.295882	-0.624813	0.532094	0.876207	no
Glyma01g39340	Glyma01g39340	Glyma01g39340	Gm01:51296877-51297857	byo-15-0	byo-15-7	NOTEST	0	0.14878	1.79769e+308	1.79769e+308	0.111832	1	no
Glyma01g39350	Glyma01g39350	Glyma01g39350	Gm01:51298441-51305321	byo-15-0	byo-15-7	OK	18.8132	25.1839	0.420755	-0.880961	0.378339	0.794376	no
Glyma01g39360	Glyma01g39360	Glyma01g39360	Gm01:51314677-51315832	byo-15-0	byo-15-7	NOTEST	0	0	0	0	1	1	no
Glyma01g39370	Glyma01g39370	Glyma01g39370	Gm01:51321188-51322374	byo-15-0	byo-15-7	OK	6.63185	1.97304	-1.74899	2.93101	0.00337866	0.054723	no
Glyma01g39380	Glyma01g39380	Glyma01g39380	Gm01:51332253-51333769	byo-15-0	byo-15-7	NOTEST	0	0.0126549	1.79769e+308	1.79769e+308	0.271454	1	no
Glyma01g39391	Glyma01g39391	Glyma01g39391	Gm01:51334950-51335823	byo-15-0	byo-15-7	NOTEST	0	0	0	0	1	1	no
Glyma01g39401	Glyma01g39401	Glyma01g39401	Gm01:51345282-51346122	byo-15-0	byo-15-7	NOTEST	0	0	0	0	1	1	no
Glyma01g39410	Glyma01g39410	Glyma01g39410	Gm01:51349990-51355206	byo-15-0	byo-15-7	OK	7.5395	4.48207	-0.750305	1.39026	0.16445	0.572246	no
Glyma01g39420	Glyma01g39420	Glyma01g39420	Gm01:51355206-51358366	byo-15-0	byo-15-7	OK	4.17063	6.8954	0.725368	-1.48352	0.137936	0.525947	no
Glyma01g39430	Glyma01g39430	Glyma01g39430	Gm01:51363128-51376630	byo-15-0	byo-15-7	OK	0.973272	1.12616	0.2105	-0.384461	0.700637	0.939256	no
Glyma01g39440	Glyma01g39440	Glyma01g39440	Gm01:51376879-51383234	byo-15-0	byo-15-7	NOTEST	0	0	0	0	1	1	no
Glyma01g39451	Glyma01g39451	Glyma01g39451	Gm01:51385174-51388582	byo-15-0	byo-15-7	NOTEST	0.0425592	0.022763	-0.90278	0.431774	0.665906	1	no
Glyma01g39460	Glyma01g39460	Glyma01g39460	Gm01:51397147-51399175	byo-15-0	byo-15-7	OK	1.50712	0.521189	-1.53191	1.86386	0.0623416	0.34348	no
Glyma01g39470	Glyma01g39470	Glyma01g39470	Gm01:51403228-51406259	byo-15-0	byo-15-7	OK	1.46668	1.1875	-0.304629	0.390101	0.696462	0.93859	no
Glyma01g39480	Glyma01g39480	Glyma01g39480	Gm01:51407024-51411165	byo-15-0	byo-15-7	NOTEST	0.32922	0.0815803	-2.01276	1.94303	0.052013	1	no
Glyma01g39490	Glyma01g39490	Glyma01g39490	Gm01:51412886-51422885	byo-15-0	byo-15-7	OK	1.06891	1.97251	0.8839	-1.53998	0.123564	0.498897	no
Glyma01g39500	Glyma01g39500	Glyma01g39500	Gm01:51428871-51431363	byo-15-0	byo-15-7	OK	114.477	70.6241	-0.696823	1.30919	0.19047	0.61023	no
Glyma01g39510	Glyma01g39510	Glyma01g39510	Gm01:51431925-51439061	byo-15-0	byo-15-7	OK	1.19628	0.587253	-1.0265	1.6184	0.105577	0.4608	no
Glyma01g39520	Glyma01g39520	Glyma01g39520	Gm01:51456457-51460406	byo-15-0	byo-15-7	OK	2.1171	3.60144	0.766485	-1.26287	0.206637	0.630594	no
Glyma01g39530	Glyma01g39530	Glyma01g39530	Gm01:51483951-51489283	byo-15-0	byo-15-7	OK	122.873	261.257	1.0883	-1.80743	0.0706953	0.367072	no
Glyma01g39540	Glyma01g39540	Glyma01g39540	Gm01:51490230-51491823	byo-15-0	byo-15-7	OK	18.2505	19.2024	0.0733548	-0.154719	0.877043	0.978196	no
Glyma01g39560	Glyma01g39560	Glyma01g39560	Gm01:51508290-51512259	byo-15-0	byo-15-7	OK	5.80211	7.85674	0.437353	-0.844488	0.398397	0.804886	no
Glyma01g39570	Glyma01g39570	Glyma01g39570	Gm01:51516172-51517312	byo-15-0	byo-15-7	OK	1.42227	0.107269	-3.72889	3.40691	0.000657033	0.0171867	yes
Glyma01g39580	Glyma01g39580	Glyma01g39580	Gm01:51518038-51522362	byo-15-0	byo-15-7	OK	10.6582	16.7384	0.651193	-1.35645	0.174957	0.586873	no
Glyma01g39590	Glyma01g39590	Glyma01g39590	Gm01:51527348-51528891	byo-15-0	byo-15-7	OK	1.31648	2.71756	1.04563	-1.62003	0.105225	0.459974	no
Glyma01g39600	Glyma01g39600	Glyma01g39600	Gm01:51531989-51534998	byo-15-0	byo-15-7	OK	10.3395	4.76624	-1.11724	2.11238	0.0346536	0.242267	no
Glyma01g39610	Glyma01g39610	Glyma01g39610	Gm01:51545785-51549819	byo-15-0	byo-15-7	OK	1.75202	1.64553	-0.0904652	0.157262	0.875039	0.977643	no
Glyma01g39630	Glyma01g39630	Glyma01g39630	Gm01:51555027-51556605	byo-15-0	byo-15-7	NOTEST	0.149781	0.140488	-0.0924161	0.0834236	0.933515	1	no
Glyma01g39640	Glyma01g39640	Glyma01g39640	Gm01:51557943-51560354	byo-15-0	byo-15-7	OK	7.48905	9.66002	0.367245	-0.721772	0.470435	0.844467	no
Glyma01g39650	Glyma01g39650	Glyma01g39650	Gm01:51565663-51573461	byo-15-0	byo-15-7	OK	3.15913	1.46721	-1.10645	1.9537	0.0507365	0.30489	no
Glyma01g39660	Glyma01g39660	Glyma01g39660	Gm01:51574045-51576407	byo-15-0	byo-15-7	OK	1.38524	1.79091	0.370558	-0.623422	0.533007	0.87624	no
Glyma01g39690	Glyma01g39690	Glyma01g39690	Gm01:51579270-51581490	byo-15-0	byo-15-7	NOTEST	0	0.224564	1.79769e+308	1.79769e+308	0.01611	1	no
Glyma01g39700	Glyma01g39700	Glyma01g39700	Gm01:51584479-51586969	byo-15-0	byo-15-7	OK	6.9605	4.96995	-0.485959	0.86526	0.386896	0.798634	no
Glyma01g39710	Glyma01g39710	Glyma01g39710	Gm01:51587208-51587971	byo-15-0	byo-15-7	OK	1.83466	0.560975	-1.70951	1.84794	0.0646112	0.350225	no
Glyma01g39720	Glyma01g39720	Glyma01g39720	Gm01:51588563-51590809	byo-15-0	byo-15-7	OK	0.26182	0.514588	0.974844	-1.10793	0.26789	0.702109	no
Glyma01g39740	Glyma01g39740	Glyma01g39740	Gm01:51613142-51614901	byo-15-0	byo-15-7	OK	14.3953	19.0948	0.407586	-0.85492	0.392595	0.801808	no
Glyma01g39750	Glyma01g39750	Glyma01g39750	Gm01:51624486-51625983	byo-15-0	byo-15-7	OK	0.69716	0.697505	0.00071295	-0.000817187	0.999348	0.99981	no
Glyma01g39760	Glyma01g39760	Glyma01g39760	Gm01:51627630-51629200	byo-15-0	byo-15-7	NOTEST	0	0	0	0	1	1	no
Glyma01g39770	Glyma01g39770	Glyma01g39770	Gm01:51633199-51634269	byo-15-0	byo-15-7	OK	7.02123	14.5152	1.04777	-1.93116	0.0534628	0.313545	no
Glyma01g39780	Glyma01g39780	Glyma01g39780	Gm01:51645378-51647678	byo-15-0	byo-15-7	NOTEST	0	0.0332937	1.79769e+308	1.79769e+308	0.111832	1	no
Glyma01g39790	Glyma01g39790	Glyma01g39790	Gm01:51653322-51656914	byo-15-0	byo-15-7	OK	33.7441	24.8635	-0.440608	0.898899	0.368706	0.787549	no
Glyma01g39800	Glyma01g39800	Glyma01g39800	Gm01:51659391-51665037	byo-15-0	byo-15-7	OK	2.04783	2.58079	0.333716	-0.576907	0.564002	0.888745	no
Glyma01g39810	Glyma01g39810	Glyma01g39810	Gm01:51668222-51670161	byo-15-0	byo-15-7	OK	11.7467	2.25774	-2.3793	4.33618	1.44982e-05	0.000913314	yes
Glyma01g39820	Glyma01g39820	Glyma01g39820	Gm01:51675929-51677501	byo-15-0	byo-15-7	NOTEST	0	0	0	0	1	1	no
Glyma01g39830	Glyma01g39830	Glyma01g39830	Gm01:51679882-51690594	byo-15-0	byo-15-7	OK	2.60723	2.41167	-0.112489	0.222766	0.823718	0.966271	no
Glyma01g39850	Glyma01g39850	Glyma01g39850	Gm01:51698415-51700257	byo-15-0	byo-15-7	OK	8.68217	13.1141	0.594987	-1.23344	0.217413	0.645227	no
Glyma01g39860	Glyma01g39860	Glyma01g39860	Gm01:51704330-51708072	byo-15-0	byo-15-7	OK	0.741642	2.13339	1.52435	-2.15016	0.0315424	0.229965	no
Glyma01g39870	Glyma01g39870	Glyma01g39870	Gm01:51714716-51716494	byo-15-0	byo-15-7	NOTEST	0	0.0460421	1.79769e+308	1.79769e+308	0.111832	1	no
Glyma01g39880	Glyma01g39880	Glyma01g39880	Gm01:51721226-51730602	byo-15-0	byo-15-7	OK	0.713133	1.00756	0.498627	-0.147045	0.883097	0.979482	no
Glyma01g39890	Glyma01g39890	Glyma01g39890	Gm01:51721226-51730602	byo-15-0	byo-15-7	OK	67.6099	22.5317	-1.58528	3.08998	0.00200173	0.0386579	yes
Glyma01g39900	Glyma01g39900	Glyma01g39900	Gm01:51730921-51747255	byo-15-0	byo-15-7	NOTEST	0	0.041901	1.79769e+308	1.79769e+308	0.355625	1	no
Glyma01g39910	Glyma01g39910	Glyma01g39910	Gm01:51730921-51747255	byo-15-0	byo-15-7	OK	0.745722	0.975436	0.387409	-0.504669	0.613792	0.909542	no
Glyma01g39920	Glyma01g39920	Glyma01g39920	Gm01:51750715-51754579	byo-15-0	byo-15-7	OK	0.677325	0.798158	0.236825	-0.276439	0.782211	0.957162	no
Glyma01g39935	Glyma01g39935	Glyma01g39935	Gm01:51755461-51757387	byo-15-0	byo-15-7	OK	22.8232	16.2549	-0.489628	1.02461	0.305545	0.736085	no
Glyma01g39950	Glyma01g39950	Glyma01g39950	Gm01:51758052-51764933	byo-15-0	byo-15-7	OK	5.77025	9.55411	0.727488	-1.51471	0.129847	0.510878	no
Glyma01g39960	Glyma01g39960	Glyma01g39960	Gm01:51768697-51773656	byo-15-0	byo-15-7	OK	16.3556	17.9524	0.134394	-0.277003	0.781778	0.957162	no
Glyma01g39970	Glyma01g39970	Glyma01g39970	Gm01:51778756-51782898	byo-15-0	byo-15-7	OK	15.5933	8.13566	-0.938596	1.96803	0.0490645	0.29951	no
Glyma01g39981	Glyma01g39981	Glyma01g39981	Gm01:51784287-51787179	byo-15-0	byo-15-7	OK	1.14107	2.94879	1.36973	-1.9168	0.0552639	0.320854	no
Glyma01g39990	Glyma01g39990	Glyma01g39990	Gm01:51795376-51797766	byo-15-0	byo-15-7	OK	0.623659	0.229634	-1.44142	1.57874	0.114395	0.478472	no
Glyma01g40010	Glyma01g40010	Glyma01g40010	Gm01:51813387-51815770	byo-15-0	byo-15-7	OK	24.0279	7.94485	-1.59662	3.30976	0.000933772	0.0222205	yes
Glyma01g40030	Glyma01g40030	Glyma01g40030	Gm01:51830579-51838128	byo-15-0	byo-15-7	OK	2.51894	2.71002	0.105489	-0.0598329	0.952289	0.991449	no
Glyma01g40041	Glyma01g40041	Glyma01g40041	Gm01:51830579-51838128	byo-15-0	byo-15-7	OK	1.57746	2.26611	0.522615	-0.869189	0.384744	0.797919	no
Glyma01g40050	Glyma01g40050	Glyma01g40050	Gm01:51861767-51863943	byo-15-0	byo-15-7	NOTEST	0	0.0201143	1.79769e+308	1.79769e+308	0.194774	1	no
Glyma01g40060	Glyma01g40060	Glyma01g40060	Gm01:51873281-51875272	byo-15-0	byo-15-7	NOTEST	0	0	0	0	1	1	no
Glyma01g40080	Glyma01g40080	Glyma01g40080	Gm01:51889805-51895295	byo-15-0	byo-15-7	OK	2.70504	1.61886	-0.740674	1.45118	0.146731	0.542578	no
Glyma01g40090	Glyma01g40090	Glyma01g40090	Gm01:51899586-51905304	byo-15-0	byo-15-7	OK	3.60752	3.46305	-0.0589645	0.0856875	0.931715	0.987823	no
Glyma01g40100	Glyma01g40100	Glyma01g40100	Gm01:51910087-51912612	byo-15-0	byo-15-7	NOTEST	0.123688	0.440076	1.83105	-1.87808	0.0603704	1	no
Glyma01g40110	Glyma01g40110	Glyma01g40110	Gm01:51918737-51926979	byo-15-0	byo-15-7	NOTEST	0.107474	0.156847	0.545368	-0.574948	0.565326	1	no
Glyma01g40130	Glyma01g40130	Glyma01g40130	Gm01:51926992-51932894	byo-15-0	byo-15-7	OK	3.21431	6.67265	1.05375	-2.18482	0.0289021	0.218236	no
Glyma01g40140	Glyma01g40140	Glyma01g40140	Gm01:51939465-51943260	byo-15-0	byo-15-7	OK	45.7511	19.2397	-1.24972	2.56293	0.0103792	0.115621	no
Glyma01g40150	Glyma01g40150	Glyma01g40150	Gm01:51946620-51947536	byo-15-0	byo-15-7	OK	39.8132	51.9138	0.382873	-0.794463	0.426926	0.821542	no
Glyma01g40161	Glyma01g40161	Glyma01g40161	Gm01:51948401-51952638	byo-15-0	byo-15-7	OK	0.474276	0.564102	0.250229	-0.316577	0.751565	0.95215	no
Glyma01g40170	Glyma01g40170	Glyma01g40170	Gm01:51956944-51961922	byo-15-0	byo-15-7	OK	3.67245	4.3671	0.249932	-0.496992	0.619194	0.912667	no
Glyma01g40180	Glyma01g40180	Glyma01g40180	Gm01:51965657-51969274	byo-15-0	byo-15-7	OK	2.09961	1.05704	-0.990091	1.62367	0.104447	0.458285	no
Glyma01g40190	Glyma01g40190	Glyma01g40190	Gm01:51969918-51974115	byo-15-0	byo-15-7	OK	1.63757	1.65816	0.0180282	-0.0297615	0.976257	0.995315	no
[truncated: 52,176 more rows]
