# Supplementary material for: Overexpression of a Cinnamyl Alcohol Dehydrogenase-Coding Gene, GsCAD1, from Wild Soybean Enhances Resistance to Soybean Mosaic Virus
Source: MDPI journal article supplement (doi:10.3390/ijms232315206), 2022-12-02
Supplement: s1 [file s1 › Table S2 BYO-15-0D-vs-14D.xlsx]

## Sheet: Sheet1
test_id	gene_id	gene	locus	sample_1	sample_2	status	value_1	value_2	log2(fold_change)	test_stat	p_value	q_value	significant
Glyma0002s50	Glyma0002s50	Glyma0002s50	Gm02:2248-17672	byo-15-0	byo-15-14	OK	2.81433	3.35213	0.252289	-0.447414	0.654576	0.921666	no
Glyma0003s50	Glyma0003s50	Glyma0003s50	Gm03:8648-28244	byo-15-0	byo-15-14	OK	20.5985	7.55115	-1.44777	2.53434	0.0112659	0.109071	no
Glyma0005s50	Glyma0005s50	Glyma0005s50	Gm05:16184-21667	byo-15-0	byo-15-14	OK	0.569015	0.352561	-0.690595	0.754322	0.450656	0.82494	no
Glyma0006s50	Glyma0006s50	Glyma0006s50	Gm06:1757-15096	byo-15-0	byo-15-14	OK	7.79991	7.17374	-0.120733	0.212161	0.831981	0.96703	no
Glyma0007s50	Glyma0007s50	Glyma0007s50	Gm07:1209-3554	byo-15-0	byo-15-14	NOTEST	0	0	0	0	1	1	no
Glyma0010s50	Glyma0010s50	Glyma0010s50	Gm10:10493-13224	byo-15-0	byo-15-14	NOTEST	0.0115458	0.0281772	1.28716	-0.311579	0.755361	1	no
Glyma0011s50	Glyma0011s50	Glyma0011s50	Gm11:1119-5508	byo-15-0	byo-15-14	NOTEST	0	0.00906117	1.79769e+308	1.79769e+308	0.284417	1	no
Glyma0015s50	Glyma0015s50	Glyma0015s50	Gm15:626-2726	byo-15-0	byo-15-14	NOTEST	0	0	0	0	1	1	no
Glyma0017s50	Glyma0017s50	Glyma0017s50	Gm17:405-1845	byo-15-0	byo-15-14	NOTEST	0	0	0	0	1	1	no
Glyma0018s50	Glyma0018s50	Glyma0018s50	Gm18:2484-40137	byo-15-0	byo-15-14	OK	2.06323	2.18769	0.0845041	-0.148725	0.881771	0.978393	no
Glyma0021s00410	Glyma0021s00410	Glyma0021s00410	scaffold_21:663659-664067	byo-15-0	byo-15-14	NOTEST	0	0	0	0	1	1	no
Glyma0021s00426	Glyma0021s00426	Glyma0021s00426	scaffold_21:684712-690812	byo-15-0	byo-15-14	OK	1.24951	0	-1.79769e+308	-1.79769e+308	0.0476234	0.267086	no
Glyma0021s00443	Glyma0021s00443	Glyma0021s00443	scaffold_21:692299-694156	byo-15-0	byo-15-14	NOTEST	0	0.342086	1.79769e+308	1.79769e+308	0.0814107	1	no
Glyma0021s00460	Glyma0021s00460	Glyma0021s00460	scaffold_21:716657-721100	byo-15-0	byo-15-14	OK	1.18421	0.868033	-0.448103	0.512549	0.608267	0.904458	no
Glyma0022s00200	Glyma0022s00200	Glyma0022s00200	scaffold_22:543542-558386	byo-15-0	byo-15-14	NOTEST	0	0	0	0	1	1	no
Glyma0022s00273	Glyma0022s00273	Glyma0022s00273	scaffold_22:561854-563467	byo-15-0	byo-15-14	NOTEST	0	0	0	0	1	1	no
Glyma0022s00346	Glyma0022s00346	Glyma0022s00346	scaffold_22:563726-567494	byo-15-0	byo-15-14	NOTEST	0.128121	0	-1.79769e+308	-1.79769e+308	0.108187	1	no
Glyma0022s00420	Glyma0022s00420	Glyma0022s00420	scaffold_22:722866-725638	byo-15-0	byo-15-14	OK	5.35189	7.14885	0.417662	-0.72842	0.466356	0.832322	no
Glyma0022s00430	Glyma0022s00430	Glyma0022s00430	scaffold_22:728729-731634	byo-15-0	byo-15-14	NOTEST	0	0.0774805	1.79769e+308	1.79769e+308	0.22569	1	no
Glyma0022s00443	Glyma0022s00443	Glyma0022s00443	scaffold_22:800491-802362	byo-15-0	byo-15-14	NOTEST	0	0	0	0	1	1	no
Glyma0022s00456	Glyma0022s00456	Glyma0022s00456	scaffold_22:942964-948274	byo-15-0	byo-15-14	OK	3.18883	4.59579	0.527287	-0.508056	0.611414	0.905458	no
Glyma0022s00470	Glyma0022s00470	Glyma0022s00470	scaffold_22:942964-948274	byo-15-0	byo-15-14	OK	0.486449	0.810079	0.735773	-0.223199	0.82338	0.965587	no
Glyma0022s00480	Glyma0022s00480	Glyma0022s00480	scaffold_22:952859-956925	byo-15-0	byo-15-14	OK	1.34841	0.351082	-1.94138	2.21239	0.02694	0.188615	no
Glyma0023s00410	Glyma0023s00410	Glyma0023s00410	scaffold_23:476540-479148	byo-15-0	byo-15-14	OK	5.0941	1.25525	-2.02085	2.82503	0.00472763	0.061144	no
Glyma0023s00515	Glyma0023s00515	Glyma0023s00515	scaffold_23:689759-693471	byo-15-0	byo-15-14	OK	1.0604	0.672617	-0.656756	0.691786	0.489072	0.8467	no
Glyma0023s00620	Glyma0023s00620	Glyma0023s00620	scaffold_23:694208-709536	byo-15-0	byo-15-14	OK	4.85105	4.19235	-0.210539	0.304754	0.760554	0.951197	no
Glyma0023s00670	Glyma0023s00670	Glyma0023s00670	scaffold_23:882926-883789	byo-15-0	byo-15-14	NOTEST	0	0	0	0	1	1	no
Glyma0024s00230	Glyma0024s00230	Glyma0024s00230	scaffold_24:8124-13007	byo-15-0	byo-15-14	OK	2.86759	4.56986	0.672311	-1.06679	0.286066	0.689522	no
Glyma0024s00245	Glyma0024s00245	Glyma0024s00245	scaffold_24:191608-197085	byo-15-0	byo-15-14	NOTEST	0	0	0	0	1	1	no
Glyma0024s00260	Glyma0024s00260	Glyma0024s00260	scaffold_24:201620-211808	byo-15-0	byo-15-14	OK	3.19803	2.81119	-0.186003	0.296484	0.76686	0.952565	no
Glyma0028s00210	Glyma0028s00210	Glyma0028s00210	scaffold_28:233807-247417	byo-15-0	byo-15-14	OK	13.6124	7.62535	-0.836046	1.41348	0.157514	0.521168	no
Glyma0028s00260	Glyma0028s00260	Glyma0028s00260	scaffold_28:250538-253655	byo-15-0	byo-15-14	NOTEST	0	0	0	0	1	1	no
Glyma0041s00210	Glyma0041s00210	Glyma0041s00210	scaffold_41:27189-31640	byo-15-0	byo-15-14	OK	2.55199	3.62452	0.506168	-0.853807	0.393212	0.78465	no
Glyma0041s00225	Glyma0041s00225	Glyma0041s00225	scaffold_41:41035-42513	byo-15-0	byo-15-14	NOTEST	0	0	0	0	1	1	no
Glyma0041s00240	Glyma0041s00240	Glyma0041s00240	scaffold_41:45959-49258	byo-15-0	byo-15-14	OK	0.0825765	3.94913	5.57966	-4.42926	9.45574e-06	0.000564001	yes
Glyma0041s00260	Glyma0041s00260	Glyma0041s00260	scaffold_41:61732-66813	byo-15-0	byo-15-14	OK	3.85284	2.76743	-0.477377	0.738244	0.460366	0.83055	no
Glyma0041s00271	Glyma0041s00271	Glyma0041s00271	scaffold_41:70024-73638	byo-15-0	byo-15-14	OK	1.93459	1.32779	-0.543004	0.712631	0.476074	0.838357	no
Glyma0041s00280	Glyma0041s00280	Glyma0041s00280	scaffold_41:74056-78241	byo-15-0	byo-15-14	OK	6.65279	7.42877	0.159164	-0.264898	0.791088	0.959544	no
Glyma0041s00290	Glyma0041s00290	Glyma0041s00290	scaffold_41:85372-94695	byo-15-0	byo-15-14	OK	8.28394	1.02857	-3.00968	4.34955	1.36415e-05	0.000760449	yes
Glyma0041s00300	Glyma0041s00300	Glyma0041s00300	scaffold_41:96315-98827	byo-15-0	byo-15-14	OK	13.5044	20.3455	0.591275	-1.03739	0.299555	0.704012	no
Glyma0041s00310	Glyma0041s00310	Glyma0041s00310	scaffold_41:111899-114096	byo-15-0	byo-15-14	OK	0.110676	0.454779	2.03882	-1.64067	0.100866	0.415315	no
Glyma0041s00331	Glyma0041s00331	Glyma0041s00331	scaffold_41:122453-123227	byo-15-0	byo-15-14	NOTEST	0	0	0	0	1	1	no
Glyma0041s00350	Glyma0041s00350	Glyma0041s00350	scaffold_41:149673-152360	byo-15-0	byo-15-14	NOTEST	0.0641641	0.0542036	-0.243377	0.141347	0.887596	1	no
Glyma0041s00360	Glyma0041s00360	Glyma0041s00360	scaffold_41:165449-171887	byo-15-0	byo-15-14	NOTEST	0	0.0328079	1.79769e+308	1.79769e+308	0.22433	1	no
Glyma0041s50	Glyma0041s50	Glyma0041s50	scaffold_41:4320-9458	byo-15-0	byo-15-14	NOTEST	0.0222998	0.108591	2.2838	-1.66739	0.095437	1	no
Glyma0042s100	Glyma0042s100	Glyma0042s100	scaffold_42:281628-284115	byo-15-0	byo-15-14	NOTEST	0.210208	0.343518	0.708565	-0.481691	0.630025	1	no
Glyma0042s50	Glyma0042s50	Glyma0042s50	scaffold_42:265872-271658	byo-15-0	byo-15-14	NOTEST	0	0	0	0	1	1	no
Glyma0048s00220	Glyma0048s00220	Glyma0048s00220	scaffold_48:756-13042	byo-15-0	byo-15-14	NOTEST	0	0	0	0	1	1	no
Glyma0048s00230	Glyma0048s00230	Glyma0048s00230	scaffold_48:13316-18869	byo-15-0	byo-15-14	OK	0.556335	2.87407	2.36907	-0.432404	0.665448	0.925263	no
Glyma0048s00240	Glyma0048s00240	Glyma0048s00240	scaffold_48:13316-18869	byo-15-0	byo-15-14	OK	2.76281	7.56256	1.45274	-2.43153	0.0150353	0.130764	no
Glyma0048s00250	Glyma0048s00250	Glyma0048s00250	scaffold_48:24012-27245	byo-15-0	byo-15-14	OK	57.6141	43.5381	-0.404142	0.672447	0.501299	0.852443	no
Glyma0048s00260	Glyma0048s00260	Glyma0048s00260	scaffold_48:30256-31906	byo-15-0	byo-15-14	OK	0.908172	2.1656	1.25373	-1.65807	0.0973026	0.406768	no
Glyma0048s00270	Glyma0048s00270	Glyma0048s00270	scaffold_48:32191-38154	byo-15-0	byo-15-14	OK	26.7383	11.0311	-1.27734	2.23169	0.0256356	0.182439	no
Glyma0048s00280	Glyma0048s00280	Glyma0048s00280	scaffold_48:41005-46815	byo-15-0	byo-15-14	OK	6.63771	1.83005	-1.8588	2.61301	0.00897475	0.0932545	no
Glyma0048s00290	Glyma0048s00290	Glyma0048s00290	scaffold_48:51746-58457	byo-15-0	byo-15-14	OK	14.6259	14.2318	-0.0394034	0.0673131	0.946332	0.992399	no
Glyma0048s00300	Glyma0048s00300	Glyma0048s00300	scaffold_48:62047-65487	byo-15-0	byo-15-14	OK	39.2678	32.7946	-0.25989	0.391354	0.695536	0.932221	no
Glyma0048s00305	Glyma0048s00305	Glyma0048s00305	scaffold_48:62047-65487	byo-15-0	byo-15-14	OK	4.06773	4.15115	0.0292852	-0.0129814	0.989643	0.99846	no
Glyma0048s00310	Glyma0048s00310	Glyma0048s00310	scaffold_48:73905-75284	byo-15-0	byo-15-14	NOTEST	0.0444812	0.111875	1.33062	-0.920224	0.357456	1	no
Glyma0048s00320	Glyma0048s00320	Glyma0048s00320	scaffold_48:78264-89175	byo-15-0	byo-15-14	OK	3.40108	3.23244	-0.0733704	0.114918	0.90851	0.984445	no
Glyma0048s00330	Glyma0048s00330	Glyma0048s00330	scaffold_48:92831-93821	byo-15-0	byo-15-14	OK	16.3429	19.6953	0.269185	-0.470541	0.637969	0.915892	no
Glyma0048s00340	Glyma0048s00340	Glyma0048s00340	scaffold_48:93959-105291	byo-15-0	byo-15-14	OK	2.51987	3.11966	0.308042	-0.543324	0.586907	0.894781	no
Glyma0048s00350	Glyma0048s00350	Glyma0048s00350	scaffold_48:115208-118892	byo-15-0	byo-15-14	NOTEST	0	0	0	0	1	1	no
Glyma0048s50	Glyma0048s50	Glyma0048s50	scaffold_48:756-13042	byo-15-0	byo-15-14	NOTEST	0	0	0	0	1	1	no
Glyma0053s100	Glyma0053s100	Glyma0053s100	scaffold_53:40277-44576	byo-15-0	byo-15-14	NOTEST	0	0	0	0	1	1	no
Glyma0053s150	Glyma0053s150	Glyma0053s150	scaffold_53:60537-64721	byo-15-0	byo-15-14	NOTEST	0	0	0	0	1	1	no
Glyma0053s200	Glyma0053s200	Glyma0053s200	scaffold_53:96299-97317	byo-15-0	byo-15-14	NOTEST	0	0	0	0	1	1	no
Glyma0053s50	Glyma0053s50	Glyma0053s50	scaffold_53:1663-6177	byo-15-0	byo-15-14	NOTEST	0	0	0	0	1	1	no
Glyma0057s100	Glyma0057s100	Glyma0057s100	scaffold_57:113347-115364	byo-15-0	byo-15-14	OK	0.890401	1.19876	0.429012	-0.402353	0.687424	0.930315	no
Glyma0057s50	Glyma0057s50	Glyma0057s50	scaffold_57:98459-99986	byo-15-0	byo-15-14	NOTEST	0	0	0	0	1	1	no
Glyma0060s00220	Glyma0060s00220	Glyma0060s00220	scaffold_60:12548-13243	byo-15-0	byo-15-14	NOTEST	0	0	0	0	1	1	no
Glyma0060s00320	Glyma0060s00320	Glyma0060s00320	scaffold_60:67387-68707	byo-15-0	byo-15-14	NOTEST	0	0	0	0	1	1	no
Glyma0060s00370	Glyma0060s00370	Glyma0060s00370	scaffold_60:104356-106210	byo-15-0	byo-15-14	NOTEST	0	0	0	0	1	1	no
Glyma0066s50	Glyma0066s50	Glyma0066s50	scaffold_66:161914-164286	byo-15-0	byo-15-14	NOTEST	0	0	0	0	1	1	no
Glyma0067s50	Glyma0067s50	Glyma0067s50	scaffold_67:44433-45302	byo-15-0	byo-15-14	NOTEST	0	0	0	0	1	1	no
Glyma0070s50	Glyma0070s50	Glyma0070s50	scaffold_70:35574-40055	byo-15-0	byo-15-14	OK	2.12503	1.80106	-0.238635	0.312382	0.754751	0.94973	no
Glyma0079s00200	Glyma0079s00200	Glyma0079s00200	scaffold_79:9482-9737	byo-15-0	byo-15-14	NOTEST	0	0	0	0	1	1	no
Glyma0079s00210	Glyma0079s00210	Glyma0079s00210	scaffold_79:16304-17051	byo-15-0	byo-15-14	NOTEST	0	0	0	0	1	1	no
Glyma0079s00220	Glyma0079s00220	Glyma0079s00220	scaffold_79:17736-18009	byo-15-0	byo-15-14	NOTEST	0	0	0	0	1	1	no
Glyma0079s00230	Glyma0079s00230	Glyma0079s00230	scaffold_79:18723-19596	byo-15-0	byo-15-14	NOTEST	0	0	0	0	1	1	no
Glyma0079s00240	Glyma0079s00240	Glyma0079s00240	scaffold_79:20660-20912	byo-15-0	byo-15-14	OK	0.710433	0	-1.79769e+308	-1.79769e+308	0.237695	0.634827	no
Glyma0079s00250	Glyma0079s00250	Glyma0079s00250	scaffold_79:20961-21240	byo-15-0	byo-15-14	OK	2.65817	0	-1.79769e+308	-1.79769e+308	0.0424034	0.249611	no
Glyma0079s00261	Glyma0079s00261	Glyma0079s00261	scaffold_79:22053-22326	byo-15-0	byo-15-14	NOTEST	0	0	0	0	1	1	no
Glyma0079s00270	Glyma0079s00270	Glyma0079s00270	scaffold_79:25288-26862	byo-15-0	byo-15-14	NOTEST	0	0.00925826	1.79769e+308	1.79769e+308	0.320889	1	no
Glyma0079s00280	Glyma0079s00280	Glyma0079s00280	scaffold_79:27077-28537	byo-15-0	byo-15-14	NOTEST	0.0157855	0.00653646	-1.27202	0.297592	0.766015	1	no
Glyma0079s00290	Glyma0079s00290	Glyma0079s00290	scaffold_79:30187-34025	byo-15-0	byo-15-14	NOTEST	0	0	0	0	1	1	no
Glyma0079s00295	Glyma0079s00295	Glyma0079s00295	scaffold_79:54681-55767	byo-15-0	byo-15-14	NOTEST	0.0432068	0.0133878	-1.69034	0.481172	0.630394	1	no
Glyma0079s00300	Glyma0079s00300	Glyma0079s00300	scaffold_79:56320-57461	byo-15-0	byo-15-14	NOTEST	0.021421	0.00894841	-1.25932	0.29462	0.768284	1	no
Glyma0079s00311	Glyma0079s00311	Glyma0079s00311	scaffold_79:123336-123591	byo-15-0	byo-15-14	NOTEST	0	0	0	0	1	1	no
Glyma0079s00320	Glyma0079s00320	Glyma0079s00320	scaffold_79:127744-128017	byo-15-0	byo-15-14	NOTEST	0	0	0	0	1	1	no
Glyma0079s00330	Glyma0079s00330	Glyma0079s00330	scaffold_79:128776-129055	byo-15-0	byo-15-14	NOTEST	0	0	0	0	1	1	no
Glyma0079s00340	Glyma0079s00340	Glyma0079s00340	scaffold_79:161645-161951	byo-15-0	byo-15-14	NOTEST	0	0	0	0	1	1	no
Glyma0079s00350	Glyma0079s00350	Glyma0079s00350	scaffold_79:164291-164540	byo-15-0	byo-15-14	NOTEST	0	0	0	0	1	1	no
Glyma0079s00360	Glyma0079s00360	Glyma0079s00360	scaffold_79:165133-166200	byo-15-0	byo-15-14	NOTEST	0.253558	0.064893	-1.96618	1.16715	0.243148	1	no
Glyma0079s00370	Glyma0079s00370	Glyma0079s00370	scaffold_79:167220-167502	byo-15-0	byo-15-14	NOTEST	0	0	0	0	1	1	no
Glyma0080s50	Glyma0080s50	Glyma0080s50	scaffold_80:33970-43733	byo-15-0	byo-15-14	OK	0	0.51866	1.79769e+308	1.79769e+308	0.0130271	0.118874	no
Glyma0084s00210	Glyma0084s00210	Glyma0084s00210	scaffold_84:12274-20446	byo-15-0	byo-15-14	OK	128.25	72.4982	-0.82294	1.24441	0.213348	0.603327	no
Glyma0084s00230	Glyma0084s00230	Glyma0084s00230	scaffold_84:53420-54224	byo-15-0	byo-15-14	NOTEST	0	0	0	0	1	1	no
Glyma0086s00200	Glyma0086s00200	Glyma0086s00200	scaffold_86:18942-19924	byo-15-0	byo-15-14	NOTEST	0	0	0	0	1	1	no
Glyma0086s00250	Glyma0086s00250	Glyma0086s00250	scaffold_86:40393-43241	byo-15-0	byo-15-14	NOTEST	0	0	0	0	1	1	no
Glyma0086s00300	Glyma0086s00300	Glyma0086s00300	scaffold_86:91106-93419	byo-15-0	byo-15-14	NOTEST	0	0	0	0	1	1	no
Glyma0090s00200	Glyma0090s00200	Glyma0090s00200	scaffold_90:4631-8816	byo-15-0	byo-15-14	NOTEST	0.34146	0.081972	-2.05851	2.12613	0.0334922	1	no
Glyma0090s00250	Glyma0090s00250	Glyma0090s00250	scaffold_90:22827-24762	byo-15-0	byo-15-14	NOTEST	0	0	0	0	1	1	no
Glyma0090s00300	Glyma0090s00300	Glyma0090s00300	scaffold_90:24885-25615	byo-15-0	byo-15-14	NOTEST	0	0	0	0	1	1	no
Glyma0090s00350	Glyma0090s00350	Glyma0090s00350	scaffold_90:44125-48952	byo-15-0	byo-15-14	NOTEST	0.136295	0.0338431	-2.0098	1.79222	0.073098	1	no
Glyma0091s00230	Glyma0091s00230	Glyma0091s00230	scaffold_91:29255-30661	byo-15-0	byo-15-14	NOTEST	0	0	0	0	1	1	no
Glyma0092s00200	Glyma0092s00200	Glyma0092s00200	scaffold_92:4798-6418	byo-15-0	byo-15-14	OK	0.568724	0.57428	0.0140262	-0.0154372	0.987683	0.998326	no
Glyma0092s00210	Glyma0092s00210	Glyma0092s00210	scaffold_92:9477-13080	byo-15-0	byo-15-14	OK	4.0963	7.3314	0.83977	-1.23795	0.215736	0.606959	no
Glyma0092s00230	Glyma0092s00230	Glyma0092s00230	scaffold_92:31216-33044	byo-15-0	byo-15-14	OK	17.3225	22.0845	0.350381	-0.620587	0.534871	0.871021	no
Glyma0092s00240	Glyma0092s00240	Glyma0092s00240	scaffold_92:54198-55797	byo-15-0	byo-15-14	OK	12.7356	17.5277	0.46077	-0.81828	0.413197	0.798677	no
Glyma0096s100	Glyma0096s100	Glyma0096s100	scaffold_96:83938-84651	byo-15-0	byo-15-14	NOTEST	0	0	0	0	1	1	no
Glyma0096s50	Glyma0096s50	Glyma0096s50	scaffold_96:24926-29013	byo-15-0	byo-15-14	NOTEST	0	0	0	0	1	1	no
Glyma0101s00200	Glyma0101s00200	Glyma0101s00200	scaffold_101:409-679	byo-15-0	byo-15-14	NOTEST	0	0	0	0	1	1	no
Glyma0101s00210	Glyma0101s00210	Glyma0101s00210	scaffold_101:1190-2295	byo-15-0	byo-15-14	NOTEST	0	0	0	0	1	1	no
Glyma0101s00230	Glyma0101s00230	Glyma0101s00230	scaffold_101:16731-19812	byo-15-0	byo-15-14	NOTEST	0	0	0	0	1	1	no
Glyma0101s00241	Glyma0101s00241	Glyma0101s00241	scaffold_101:20750-20975	byo-15-0	byo-15-14	NOTEST	0	0	0	0	1	1	no
Glyma0101s00251	Glyma0101s00251	Glyma0101s00251	scaffold_101:42209-42999	byo-15-0	byo-15-14	NOTEST	0	0	0	0	1	1	no
Glyma0101s00260	Glyma0101s00260	Glyma0101s00260	scaffold_101:49116-50221	byo-15-0	byo-15-14	NOTEST	0	0	0	0	1	1	no
Glyma0103s100	Glyma0103s100	Glyma0103s100	scaffold_103:35985-36595	byo-15-0	byo-15-14	OK	1.55913	0.881395	-0.822882	0.829236	0.406971	0.7937	no
Glyma0103s50	Glyma0103s50	Glyma0103s50	scaffold_103:19207-24805	byo-15-0	byo-15-14	NOTEST	0.164287	0.119675	-0.457091	0.30526	0.760168	1	no
Glyma0120s50	Glyma0120s50	Glyma0120s50	scaffold_120:55294-60491	byo-15-0	byo-15-14	NOTEST	0	0.0168621	1.79769e+308	1.79769e+308	0.35343	1	no
Glyma0121s00200	Glyma0121s00200	Glyma0121s00200	scaffold_121:11730-14225	byo-15-0	byo-15-14	NOTEST	0	0.00243401	1.79769e+308	1.79769e+308	0.371094	1	no
Glyma0121s00230	Glyma0121s00230	Glyma0121s00230	scaffold_121:28095-29760	byo-15-0	byo-15-14	NOTEST	0	0	0	0	1	1	no
Glyma0121s00240	Glyma0121s00240	Glyma0121s00240	scaffold_121:38140-41744	byo-15-0	byo-15-14	NOTEST	0.00403846	0.0371112	3.19998	-0.3231	0.74662	1	no
Glyma0128s50	Glyma0128s50	Glyma0128s50	scaffold_128:8755-9643	byo-15-0	byo-15-14	NOTEST	0	0	0	0	1	1	no
Glyma0146s00210	Glyma0146s00210	Glyma0146s00210	scaffold_146:13454-14636	byo-15-0	byo-15-14	NOTEST	0	0	0	0	1	1	no
Glyma0165s00200	Glyma0165s00200	Glyma0165s00200	scaffold_165:18150-20209	byo-15-0	byo-15-14	NOTEST	0.0186749	0.0283367	0.601572	-0.180694	0.856608	1	no
Glyma0165s50	Glyma0165s50	Glyma0165s50	scaffold_165:12356-14234	byo-15-0	byo-15-14	NOTEST	0	0	0	0	1	1	no
Glyma0169s00200	Glyma0169s00200	Glyma0169s00200	scaffold_169:6036-7668	byo-15-0	byo-15-14	OK	59.4161	80.2375	0.433424	-0.707868	0.479027	0.840679	no
Glyma0169s00210	Glyma0169s00210	Glyma0169s00210	scaffold_169:10271-14284	byo-15-0	byo-15-14	OK	178.738	81.8063	-1.12756	1.55158	0.120762	0.454214	no
Glyma0174s50	Glyma0174s50	Glyma0174s50	scaffold_174:28-832	byo-15-0	byo-15-14	OK	0.810829	0.316026	-1.35936	1.1632	0.24475	0.643736	no
Glyma0175s50	Glyma0175s50	Glyma0175s50	scaffold_175:15261-16399	byo-15-0	byo-15-14	NOTEST	0	0	0	0	1	1	no
Glyma0196s00210	Glyma0196s00210	Glyma0196s00210	scaffold_196:12292-15573	byo-15-0	byo-15-14	NOTEST	0.193532	0.0376481	-2.36192	1.89872	0.0576014	1	no
Glyma0196s130	Glyma0196s130	Glyma0196s130	scaffold_196:9547-9835	byo-15-0	byo-15-14	NOTEST	0	0	0	0	1	1	no
Glyma0196s50	Glyma0196s50	Glyma0196s50	scaffold_196:6280-7448	byo-15-0	byo-15-14	NOTEST	0.158749	0.116723	-0.443652	0.251553	0.801387	1	no
Glyma01g00210	Glyma01g00210	Glyma01g00210	Gm01:27642-27977	byo-15-0	byo-15-14	OK	9.01633	15.0004	0.734393	-0.62472	0.532155	0.86955	no
Glyma01g00241	Glyma01g00241	Glyma01g00241	Gm01:28504-30546	byo-15-0	byo-15-14	NOTEST	0	0.301912	1.79769e+308	1.79769e+308	0.0259569	1	no
Glyma01g00270	Glyma01g00270	Glyma01g00270	Gm01:51480-61502	byo-15-0	byo-15-14	NOTEST	0.235308	0.119592	-0.976431	0.855681	0.392174	1	no
Glyma01g00280	Glyma01g00280	Glyma01g00280	Gm01:61964-63428	byo-15-0	byo-15-14	NOTEST	0	0	0	0	1	1	no
Glyma01g00291	Glyma01g00291	Glyma01g00291	Gm01:69968-71359	byo-15-0	byo-15-14	OK	0.999865	1.56919	0.650216	-0.721518	0.470591	0.834828	no
Glyma01g00300	Glyma01g00300	Glyma01g00300	Gm01:90229-96102	byo-15-0	byo-15-14	OK	5.75187	4.24004	-0.439951	0.764205	0.444745	0.820393	no
Glyma01g00311	Glyma01g00311	Glyma01g00311	Gm01:111565-114809	byo-15-0	byo-15-14	NOTEST	0	0	0	0	1	1	no
Glyma01g00321	Glyma01g00321	Glyma01g00321	Gm01:116191-128024	byo-15-0	byo-15-14	OK	3.07721	2.79977	-0.136313	0.227161	0.820299	0.965226	no
Glyma01g00341	Glyma01g00341	Glyma01g00341	Gm01:143352-155722	byo-15-0	byo-15-14	OK	0.890447	0.901022	0.017033	-0.0179282	0.985696	0.997955	no
Glyma01g00361	Glyma01g00361	Glyma01g00361	Gm01:157174-157917	byo-15-0	byo-15-14	NOTEST	0	0	0	0	1	1	no
Glyma01g00380	Glyma01g00380	Glyma01g00380	Gm01:170678-193544	byo-15-0	byo-15-14	OK	3.64769	3.70019	0.0206153	-0.0350123	0.97207	0.995692	no
Glyma01g00400	Glyma01g00400	Glyma01g00400	Gm01:196374-202050	byo-15-0	byo-15-14	OK	14.1191	7.60629	-0.89238	1.28849	0.197576	0.582974	no
Glyma01g00410	Glyma01g00410	Glyma01g00410	Gm01:205593-226050	byo-15-0	byo-15-14	OK	28.0512	19.698	-0.510014	0.824942	0.409404	0.795714	no
Glyma01g00420	Glyma01g00420	Glyma01g00420	Gm01:205593-226050	byo-15-0	byo-15-14	NOTEST	0.126344	0.280778	1.15207	-0.223039	0.823505	1	no
Glyma01g00430	Glyma01g00430	Glyma01g00430	Gm01:227158-238073	byo-15-0	byo-15-14	OK	36.8673	20.3485	-0.857421	1.34197	0.179607	0.557608	no
Glyma01g00440	Glyma01g00440	Glyma01g00440	Gm01:244255-244600	byo-15-0	byo-15-14	NOTEST	0	0.296846	1.79769e+308	1.79769e+308	0.210186	1	no
Glyma01g00450	Glyma01g00450	Glyma01g00450	Gm01:247079-274310	byo-15-0	byo-15-14	NOTEST	0	0	0	0	1	1	no
Glyma01g00460	Glyma01g00460	Glyma01g00460	Gm01:247079-274310	byo-15-0	byo-15-14	OK	1.13699	3.06451	1.43044	-1.56443	0.117717	0.448556	no
Glyma01g00470	Glyma01g00470	Glyma01g00470	Gm01:247079-274310	byo-15-0	byo-15-14	OK	4.51808	4.61743	0.0313809	-0.0408178	0.967441	0.995128	no
Glyma01g00481	Glyma01g00481	Glyma01g00481	Gm01:275569-278576	byo-15-0	byo-15-14	OK	0.0291185	0.580332	4.31687	-3.33652	0.000848343	0.0177494	yes
Glyma01g00490	Glyma01g00490	Glyma01g00490	Gm01:281068-285680	byo-15-0	byo-15-14	NOTEST	0	0	0	0	1	1	no
Glyma01g00500	Glyma01g00500	Glyma01g00500	Gm01:285991-288741	byo-15-0	byo-15-14	OK	102.03	112.455	0.140353	-0.229149	0.818753	0.965045	no
Glyma01g00510	Glyma01g00510	Glyma01g00510	Gm01:291440-297515	byo-15-0	byo-15-14	OK	4.11911	2.59884	-0.664463	1.06328	0.287656	0.691615	no
Glyma01g00520	Glyma01g00520	Glyma01g00520	Gm01:303945-308194	byo-15-0	byo-15-14	OK	4.83881	3.29507	-0.554343	0.897873	0.369253	0.766291	no
Glyma01g00530	Glyma01g00530	Glyma01g00530	Gm01:318581-323172	byo-15-0	byo-15-14	NOTEST	0	0.0223845	1.79769e+308	1.79769e+308	0.210186	1	no
Glyma01g00541	Glyma01g00541	Glyma01g00541	Gm01:329083-331923	byo-15-0	byo-15-14	OK	6.85252	11.3251	0.724816	-1.19197	0.233273	0.629271	no
Glyma01g00551	Glyma01g00551	Glyma01g00551	Gm01:333453-334355	byo-15-0	byo-15-14	NOTEST	0	0	0	0	1	1	no
Glyma01g00560	Glyma01g00560	Glyma01g00560	Gm01:335231-337098	byo-15-0	byo-15-14	OK	7.40017	5.64101	-0.391606	0.676749	0.498565	0.851528	no
Glyma01g00570	Glyma01g00570	Glyma01g00570	Gm01:339899-343391	byo-15-0	byo-15-14	OK	27.3256	21.6832	-0.333673	0.593193	0.553052	0.881495	no
Glyma01g00580	Glyma01g00580	Glyma01g00580	Gm01:344017-344620	byo-15-0	byo-15-14	NOTEST	0	0	0	0	1	1	no
Glyma01g00590	Glyma01g00590	Glyma01g00590	Gm01:346489-350011	byo-15-0	byo-15-14	OK	89.1143	45.8555	-0.958563	1.65029	0.0988841	0.410808	no
Glyma01g00600	Glyma01g00600	Glyma01g00600	Gm01:363275-365404	byo-15-0	byo-15-14	OK	31.6316	11.6276	-1.44381	2.52726	0.0114958	0.110253	no
Glyma01g00610	Glyma01g00610	Glyma01g00610	Gm01:369322-375842	byo-15-0	byo-15-14	OK	9.86856	10.7974	0.129773	-0.182264	0.855375	0.973023	no
Glyma01g00620	Glyma01g00620	Glyma01g00620	Gm01:369322-375842	byo-15-0	byo-15-14	NOTEST	0.109725	0.0440603	-1.31634	0.176632	0.859798	1	no
Glyma01g00640	Glyma01g00640	Glyma01g00640	Gm01:380015-381810	byo-15-0	byo-15-14	OK	8.88675	12.368	0.476881	-0.844608	0.39833	0.787229	no
Glyma01g00660	Glyma01g00660	Glyma01g00660	Gm01:384777-386898	byo-15-0	byo-15-14	NOTEST	0	0	0	0	1	1	no
Glyma01g00670	Glyma01g00670	Glyma01g00670	Gm01:387855-391000	byo-15-0	byo-15-14	OK	1.99353	2.63774	0.403976	-0.619517	0.535576	0.871217	no
Glyma01g00680	Glyma01g00680	Glyma01g00680	Gm01:391564-396978	byo-15-0	byo-15-14	OK	8.73043	3.6118	-1.27333	2.10251	0.0355087	0.222791	no
Glyma01g00690	Glyma01g00690	Glyma01g00690	Gm01:397383-400581	byo-15-0	byo-15-14	OK	9.96512	13.6311	0.451944	-0.700294	0.483744	0.84367	no
Glyma01g00700	Glyma01g00700	Glyma01g00700	Gm01:411261-413277	byo-15-0	byo-15-14	NOTEST	0	0	0	0	1	1	no
Glyma01g00710	Glyma01g00710	Glyma01g00710	Gm01:415321-417655	byo-15-0	byo-15-14	NOTEST	0.106552	0.430083	2.01306	-1.44689	0.147927	1	no
Glyma01g00720	Glyma01g00720	Glyma01g00720	Gm01:418762-423973	byo-15-0	byo-15-14	OK	1.80333	1.84857	0.0357428	-0.0589327	0.953006	0.993303	no
Glyma01g00730	Glyma01g00730	Glyma01g00730	Gm01:425499-427881	byo-15-0	byo-15-14	OK	7.60596	2.07619	-1.87319	2.44164	0.0146209	0.128255	no
Glyma01g00740	Glyma01g00740	Glyma01g00740	Gm01:429463-430748	byo-15-0	byo-15-14	OK	99.9535	151.92	0.603979	-0.937898	0.348297	0.749046	no
Glyma01g00750	Glyma01g00750	Glyma01g00750	Gm01:431176-433062	byo-15-0	byo-15-14	OK	0.0486608	0.477223	3.29383	-2.48124	0.0130927	0.119081	no
Glyma01g00760	Glyma01g00760	Glyma01g00760	Gm01:434429-437563	byo-15-0	byo-15-14	OK	20.5304	10.7116	-0.938594	1.50979	0.131097	0.473055	no
Glyma01g00771	Glyma01g00771	Glyma01g00771	Gm01:438390-439678	byo-15-0	byo-15-14	OK	4.07968	7.40541	0.860124	-1.28413	0.199096	0.584782	no
Glyma01g00780	Glyma01g00780	Glyma01g00780	Gm01:441913-445194	byo-15-0	byo-15-14	OK	0.794573	0.977966	0.299605	-0.352678	0.72433	0.940721	no
Glyma01g00790	Glyma01g00790	Glyma01g00790	Gm01:446961-452958	byo-15-0	byo-15-14	NOTEST	0.0768892	0.0102957	-2.90074	1.48074	0.138675	1	no
Glyma01g00805	Glyma01g00805	Glyma01g00805	Gm01:457615-459673	byo-15-0	byo-15-14	NOTEST	0.0633	0	-1.79769e+308	-1.79769e+308	0.108187	1	no
Glyma01g00820	Glyma01g00820	Glyma01g00820	Gm01:464651-466721	byo-15-0	byo-15-14	OK	1.94572	3.76651	0.952925	-1.52894	0.12628	0.465191	no
Glyma01g00840	Glyma01g00840	Glyma01g00840	Gm01:505341-508290	byo-15-0	byo-15-14	NOTEST	0.0771529	0.134654	0.803469	-0.441911	0.658554	1	no
Glyma01g00850	Glyma01g00850	Glyma01g00850	Gm01:512025-517266	byo-15-0	byo-15-14	OK	2.81192	5.33358	0.923546	-1.57436	0.115405	0.444334	no
Glyma01g00860	Glyma01g00860	Glyma01g00860	Gm01:518296-520313	byo-15-0	byo-15-14	OK	14.2629	13.493	-0.0800574	0.131734	0.895195	0.981898	no
Glyma01g00870	Glyma01g00870	Glyma01g00870	Gm01:523808-529106	byo-15-0	byo-15-14	OK	17.6325	22.6762	0.362945	-0.544373	0.586185	0.894354	no
Glyma01g00880	Glyma01g00880	Glyma01g00880	Gm01:544620-550750	byo-15-0	byo-15-14	OK	0.0637835	0.598133	3.22921	-2.58238	0.00981201	0.0993151	no
Glyma01g00890	Glyma01g00890	Glyma01g00890	Gm01:559624-561661	byo-15-0	byo-15-14	NOTEST	0.169284	0.174171	0.0410589	-0.0388901	0.968978	1	no
Glyma01g00900	Glyma01g00900	Glyma01g00900	Gm01:562674-567038	byo-15-0	byo-15-14	NOTEST	0.146522	0	-1.79769e+308	-1.79769e+308	0.108187	1	no
Glyma01g00910	Glyma01g00910	Glyma01g00910	Gm01:567202-572032	byo-15-0	byo-15-14	NOTEST	0.199057	0.0760914	-1.38737	1.25958	0.20782	1	no
Glyma01g00920	Glyma01g00920	Glyma01g00920	Gm01:576437-580149	byo-15-0	byo-15-14	NOTEST	0	0	0	0	1	1	no
Glyma01g00930	Glyma01g00930	Glyma01g00930	Gm01:585699-587056	byo-15-0	byo-15-14	NOTEST	0.289686	0.262437	-0.142522	0.126664	0.899206	1	no
Glyma01g00940	Glyma01g00940	Glyma01g00940	Gm01:588160-598604	byo-15-0	byo-15-14	OK	41.2021	20.4899	-1.0078	1.65591	0.0977397	0.408042	no
Glyma01g00950	Glyma01g00950	Glyma01g00950	Gm01:598924-599925	byo-15-0	byo-15-14	OK	1.05218	1.74424	0.729217	-0.887121	0.375014	0.770584	no
Glyma01g00960	Glyma01g00960	Glyma01g00960	Gm01:604191-612760	byo-15-0	byo-15-14	OK	7.7019	9.65131	0.32551	-0.52318	0.600849	0.901324	no
Glyma01g00975	Glyma01g00975	Glyma01g00975	Gm01:613982-641941	byo-15-0	byo-15-14	OK	1.12763	1.44103	0.3538	-0.547157	0.584271	0.893539	no
Glyma01g00990	Glyma01g00990	Glyma01g00990	Gm01:643213-651111	byo-15-0	byo-15-14	OK	2.29856	2.01066	-0.193056	0.329609	0.741695	0.945701	no
Glyma01g01000	Glyma01g01000	Glyma01g01000	Gm01:652294-658333	byo-15-0	byo-15-14	OK	29.4321	6.5824	-2.1607	3.41271	0.000643194	0.0144665	yes
Glyma01g01010	Glyma01g01010	Glyma01g01010	Gm01:663901-668594	byo-15-0	byo-15-14	OK	0.935943	1.18665	0.342403	-0.422881	0.672382	0.927058	no
Glyma01g01020	Glyma01g01020	Glyma01g01020	Gm01:670826-674335	byo-15-0	byo-15-14	OK	41.3338	25.5579	-0.693556	1.13299	0.257219	0.658889	no
Glyma01g01030	Glyma01g01030	Glyma01g01030	Gm01:681416-683646	byo-15-0	byo-15-14	NOTEST	0.20902	0.069112	-1.59663	1.38981	0.164587	1	no
Glyma01g01050	Glyma01g01050	Glyma01g01050	Gm01:706987-708399	byo-15-0	byo-15-14	NOTEST	0.0466847	0.111287	1.25326	-0.866727	0.386092	1	no
Glyma01g01060	Glyma01g01060	Glyma01g01060	Gm01:729658-735082	byo-15-0	byo-15-14	OK	8.12273	12.2422	0.591828	-1.00395	0.315404	0.719989	no
Glyma01g01070	Glyma01g01070	Glyma01g01070	Gm01:735854-740661	byo-15-0	byo-15-14	NOTEST	0.103055	0.220044	1.09438	-1.04579	0.295657	1	no
Glyma01g01080	Glyma01g01080	Glyma01g01080	Gm01:741674-745361	byo-15-0	byo-15-14	OK	0.77982	1.07596	0.464417	-0.667742	0.504298	0.854114	no
Glyma01g01090	Glyma01g01090	Glyma01g01090	Gm01:746504-750472	byo-15-0	byo-15-14	NOTEST	0.0697697	0.0182728	-1.9329	1.29299	0.196014	1	no
Glyma01g01101	Glyma01g01101	Glyma01g01101	Gm01:752181-756473	byo-15-0	byo-15-14	NOTEST	0	0	0	0	1	1	no
Glyma01g01110	Glyma01g01110	Glyma01g01110	Gm01:757751-761280	byo-15-0	byo-15-14	OK	7.46042	4.50488	-0.727769	1.28344	0.199337	0.585112	no
Glyma01g01120	Glyma01g01120	Glyma01g01120	Gm01:762982-771636	byo-15-0	byo-15-14	OK	0.663194	0.541928	-0.291331	0.384029	0.700957	0.934378	no
Glyma01g01130	Glyma01g01130	Glyma01g01130	Gm01:773986-783534	byo-15-0	byo-15-14	NOTEST	0	0.0194072	1.79769e+308	1.79769e+308	0.402479	1	no
Glyma01g01140	Glyma01g01140	Glyma01g01140	Gm01:773986-783534	byo-15-0	byo-15-14	OK	2.96205	4.70701	0.668217	-0.956715	0.338711	0.741061	no
Glyma01g01150	Glyma01g01150	Glyma01g01150	Gm01:786786-790850	byo-15-0	byo-15-14	OK	0.468756	0.351612	-0.414853	0.441705	0.658703	0.922953	no
Glyma01g01160	Glyma01g01160	Glyma01g01160	Gm01:801794-812173	byo-15-0	byo-15-14	NOTEST	0.0187234	0.015137	-0.306766	0.178161	0.858597	1	no
Glyma01g01165	Glyma01g01165	Glyma01g01165	Gm01:813195-815449	byo-15-0	byo-15-14	NOTEST	0	0	0	0	1	1	no
Glyma01g01170	Glyma01g01170	Glyma01g01170	Gm01:817680-822876	byo-15-0	byo-15-14	OK	2.12319	0.994671	-1.09394	1.33621	0.18148	0.560965	no
Glyma01g01180	Glyma01g01180	Glyma01g01180	Gm01:826828-831862	byo-15-0	byo-15-14	OK	53.7681	26.1949	-1.03747	1.5881	0.112264	0.437559	no
Glyma01g01190	Glyma01g01190	Glyma01g01190	Gm01:837437-839839	byo-15-0	byo-15-14	OK	11.3038	13.0226	0.204205	-0.356202	0.721689	0.940348	no
Glyma01g01210	Glyma01g01210	Glyma01g01210	Gm01:841603-854009	byo-15-0	byo-15-14	NOTEST	0.226128	0.0613257	-1.88258	1.79956	0.0719299	1	no
Glyma01g01220	Glyma01g01220	Glyma01g01220	Gm01:861697-864316	byo-15-0	byo-15-14	OK	10.891	13.3854	0.297532	-0.45687	0.647765	0.919642	no
Glyma01g01230	Glyma01g01230	Glyma01g01230	Gm01:864945-873519	byo-15-0	byo-15-14	OK	2.04991	1.59046	-0.366111	0.586968	0.557225	0.883201	no
Glyma01g01240	Glyma01g01240	Glyma01g01240	Gm01:882373-883583	byo-15-0	byo-15-14	OK	0.448082	0.276056	-0.698803	0.687822	0.491565	0.847852	no
Glyma01g01251	Glyma01g01251	Glyma01g01251	Gm01:897328-899783	byo-15-0	byo-15-14	NOTEST	0.0178322	0.0065672	-1.44114	0.420537	0.674093	1	no
Glyma01g01260	Glyma01g01260	Glyma01g01260	Gm01:901470-902792	byo-15-0	byo-15-14	OK	30.6438	73.0529	1.25335	-2.12254	0.0337928	0.216557	no
Glyma01g01270	Glyma01g01270	Glyma01g01270	Gm01:908126-916913	byo-15-0	byo-15-14	OK	16.806	12.703	-0.403805	0.707438	0.479294	0.840747	no
Glyma01g01280	Glyma01g01280	Glyma01g01280	Gm01:919766-925870	byo-15-0	byo-15-14	OK	1.06294	2.10686	0.987037	-1.56932	0.116574	0.446006	no
Glyma01g01291	Glyma01g01291	Glyma01g01291	Gm01:934414-936646	byo-15-0	byo-15-14	OK	0.234183	0.483735	1.04658	-0.995251	0.319614	0.724096	no
Glyma01g01300	Glyma01g01300	Glyma01g01300	Gm01:937313-940538	byo-15-0	byo-15-14	OK	0.448029	1.43563	1.68002	-1.98389	0.0472679	0.266524	no
Glyma01g01310	Glyma01g01310	Glyma01g01310	Gm01:952468-956652	byo-15-0	byo-15-14	OK	0.197126	1.68522	3.09574	-3.6843	0.00022933	0.00689683	yes
Glyma01g01330	Glyma01g01330	Glyma01g01330	Gm01:959531-963281	byo-15-0	byo-15-14	OK	15.2032	16.1337	0.0857009	-0.149531	0.881134	0.978301	no
Glyma01g01340	Glyma01g01340	Glyma01g01340	Gm01:966937-971332	byo-15-0	byo-15-14	OK	19.9896	11.2891	-0.824318	1.46011	0.144261	0.496996	no
Glyma01g01350	Glyma01g01350	Glyma01g01350	Gm01:972898-978372	byo-15-0	byo-15-14	OK	2.28805	1.64067	-0.479832	0.65134	0.514827	0.85894	no
Glyma01g01360	Glyma01g01360	Glyma01g01360	Gm01:980271-987366	byo-15-0	byo-15-14	OK	2.64389	2.47722	-0.0939428	0.152862	0.878507	0.977934	no
Glyma01g01365	Glyma01g01365	Glyma01g01365	Gm01:991596-992349	byo-15-0	byo-15-14	NOTEST	0	0	0	0	1	1	no
Glyma01g01370	Glyma01g01370	Glyma01g01370	Gm01:992662-997177	byo-15-0	byo-15-14	OK	1598.36	660.908	-1.27407	1.03902	0.298797	0.7032	no
Glyma01g01380	Glyma01g01380	Glyma01g01380	Gm01:1000826-1006591	byo-15-0	byo-15-14	OK	16.7703	18.2375	0.121002	-0.200248	0.841287	0.969091	no
Glyma01g01390	Glyma01g01390	Glyma01g01390	Gm01:1008758-1013501	byo-15-0	byo-15-14	OK	8.45111	26.9301	1.67201	-2.87305	0.00406535	0.0549535	no
Glyma01g01400	Glyma01g01400	Glyma01g01400	Gm01:1018233-1021659	byo-15-0	byo-15-14	OK	12.6031	2.11886	-2.57242	4.35357	1.3394e-05	0.000752027	yes
Glyma01g01410	Glyma01g01410	Glyma01g01410	Gm01:1023044-1025742	byo-15-0	byo-15-14	OK	80.8293	85.9735	0.0890134	-0.149017	0.881541	0.978393	no
Glyma01g01420	Glyma01g01420	Glyma01g01420	Gm01:1028982-1033386	byo-15-0	byo-15-14	NOTEST	0.0756494	0.0197058	-1.94071	1.29821	0.194215	1	no
Glyma01g01431	Glyma01g01431	Glyma01g01431	Gm01:1035987-1043507	byo-15-0	byo-15-14	OK	0.941803	1.42136	0.593776	-0.788156	0.430605	0.811547	no
Glyma01g01440	Glyma01g01440	Glyma01g01440	Gm01:1047147-1051040	byo-15-0	byo-15-14	OK	14.3312	8.25556	-0.795718	1.11164	0.266295	0.668472	no
Glyma01g01450	Glyma01g01450	Glyma01g01450	Gm01:1052601-1053493	byo-15-0	byo-15-14	OK	0.258627	1.78049	2.78333	-2.65404	0.00795344	0.086268	no
Glyma01g01460	Glyma01g01460	Glyma01g01460	Gm01:1056819-1061665	byo-15-0	byo-15-14	OK	13.6049	14.579	0.0997599	-0.177412	0.859184	0.974089	no
Glyma01g01470	Glyma01g01470	Glyma01g01470	Gm01:1066130-1073350	byo-15-0	byo-15-14	OK	4.89404	4.98362	0.0261683	-0.046348	0.963033	0.994028	no
Glyma01g01480	Glyma01g01480	Glyma01g01480	Gm01:1088031-1090516	byo-15-0	byo-15-14	OK	24.6101	7.88323	-1.64239	2.84054	0.00450379	0.0590115	no
Glyma01g01491	Glyma01g01491	Glyma01g01491	Gm01:1091316-1094909	byo-15-0	byo-15-14	OK	0.261874	0.846075	1.69191	-1.76796	0.0770679	0.357758	no
Glyma01g01500	Glyma01g01500	Glyma01g01500	Gm01:1095456-1099007	byo-15-0	byo-15-14	NOTEST	0	0.0742159	1.79769e+308	1.79769e+308	0.0658452	1	no
Glyma01g01510	Glyma01g01510	Glyma01g01510	Gm01:1125596-1130365	byo-15-0	byo-15-14	NOTEST	0.344402	0	-1.79769e+308	-1.79769e+308	0.0129094	1	no
Glyma01g01521	Glyma01g01521	Glyma01g01521	Gm01:1133845-1137317	byo-15-0	byo-15-14	OK	1.23682	0.34747	-1.83168	2.26278	0.0236495	0.173451	no
Glyma01g01530	Glyma01g01530	Glyma01g01530	Gm01:1138207-1139962	byo-15-0	byo-15-14	NOTEST	0	0.0781257	1.79769e+308	1.79769e+308	0.101324	1	no
Glyma01g01550	Glyma01g01550	Glyma01g01550	Gm01:1143928-1150404	byo-15-0	byo-15-14	NOTEST	0.0914101	0.0694385	-0.396618	0.343624	0.731129	1	no
Glyma01g01560	Glyma01g01560	Glyma01g01560	Gm01:1160591-1165098	byo-15-0	byo-15-14	NOTEST	0.037682	0.141941	1.91335	-1.75567	0.0791445	1	no
Glyma01g01570	Glyma01g01570	Glyma01g01570	Gm01:1165649-1171110	byo-15-0	byo-15-14	OK	0.446334	0.681017	0.609566	-0.731603	0.464411	0.832322	no
Glyma01g01580	Glyma01g01580	Glyma01g01580	Gm01:1185427-1188776	byo-15-0	byo-15-14	NOTEST	0	0	0	0	1	1	no
Glyma01g01590	Glyma01g01590	Glyma01g01590	Gm01:1196921-1198375	byo-15-0	byo-15-14	OK	3.31958	6.98645	1.07356	-1.27156	0.203529	0.591512	no
Glyma01g01601	Glyma01g01601	Glyma01g01601	Gm01:1201663-1205929	byo-15-0	byo-15-14	OK	15.5594	10.7357	-0.535381	0.95056	0.341828	0.743927	no
Glyma01g01610	Glyma01g01610	Glyma01g01610	Gm01:1207927-1212597	byo-15-0	byo-15-14	OK	8.50624	6.57449	-0.371642	0.659826	0.509365	0.856359	no
Glyma01g01620	Glyma01g01620	Glyma01g01620	Gm01:1215172-1220713	byo-15-0	byo-15-14	NOTEST	0	0.0403707	1.79769e+308	1.79769e+308	0.161853	1	no
Glyma01g01630	Glyma01g01630	Glyma01g01630	Gm01:1224165-1228877	byo-15-0	byo-15-14	NOTEST	0	0	0	0	1	1	no
Glyma01g01641	Glyma01g01641	Glyma01g01641	Gm01:1231917-1233070	byo-15-0	byo-15-14	NOTEST	0	0	0	0	1	1	no
Glyma01g01651	Glyma01g01651	Glyma01g01651	Gm01:1235950-1236741	byo-15-0	byo-15-14	NOTEST	0.145069	0.0298861	-2.27919	0.817483	0.413652	1	no
Glyma01g01661	Glyma01g01661	Glyma01g01661	Gm01:1237990-1239189	byo-15-0	byo-15-14	OK	12.2235	11.0141	-0.150302	0.138437	0.889895	0.980857	no
Glyma01g01671	Glyma01g01671	Glyma01g01671	Gm01:1237990-1239189	byo-15-0	byo-15-14	OK	1.08607	2.5181	1.21323	-0.534894	0.592723	0.897607	no
Glyma01g01680	Glyma01g01680	Glyma01g01680	Gm01:1241352-1245024	byo-15-0	byo-15-14	NOTEST	0.0195136	0.00398803	-2.29073	0.821623	0.411291	1	no
Glyma01g01690	Glyma01g01690	Glyma01g01690	Gm01:1252980-1257657	byo-15-0	byo-15-14	NOTEST	0	0	0	0	1	1	no
Glyma01g01700	Glyma01g01700	Glyma01g01700	Gm01:1273194-1280313	byo-15-0	byo-15-14	NOTEST	0	0	0	0	1	1	no
Glyma01g01715	Glyma01g01715	Glyma01g01715	Gm01:1283531-1285362	byo-15-0	byo-15-14	NOTEST	0	0	0	0	1	1	no
Glyma01g01730	Glyma01g01730	Glyma01g01730	Gm01:1289360-1298217	byo-15-0	byo-15-14	OK	1.82537	1.36344	-0.420939	0.628901	0.529414	0.868129	no
Glyma01g01740	Glyma01g01740	Glyma01g01740	Gm01:1307387-1317730	byo-15-0	byo-15-14	OK	2.41819	2.75956	0.190511	-0.270593	0.786704	0.958434	no
Glyma01g01750	Glyma01g01750	Glyma01g01750	Gm01:1319394-1322259	byo-15-0	byo-15-14	OK	1.77857	1.91833	0.10913	-0.17471	0.861307	0.974621	no
Glyma01g01770	Glyma01g01770	Glyma01g01770	Gm01:1332992-1336611	byo-15-0	byo-15-14	OK	9.88447	1.54039	-2.68187	3.2691	0.00107892	0.0210633	yes
Glyma01g01780	Glyma01g01780	Glyma01g01780	Gm01:1342969-1347966	byo-15-0	byo-15-14	NOTEST	0.162298	0.384203	1.24322	-1.4067	0.159517	1	no
Glyma01g01790	Glyma01g01790	Glyma01g01790	Gm01:1357260-1362758	byo-15-0	byo-15-14	NOTEST	0.421313	0.132941	-1.66411	1.57355	0.115592	1	no
Glyma01g01805	Glyma01g01805	Glyma01g01805	Gm01:1377132-1387290	byo-15-0	byo-15-14	OK	5.42931	4.94967	-0.133435	0.209211	0.834284	0.967377	no
Glyma01g01820	Glyma01g01820	Glyma01g01820	Gm01:1391664-1392341	byo-15-0	byo-15-14	NOTEST	0	0	0	0	1	1	no
Glyma01g01830	Glyma01g01830	Glyma01g01830	Gm01:1394336-1398687	byo-15-0	byo-15-14	OK	25.2491	13.0937	-0.947362	1.57368	0.115562	0.444834	no
Glyma01g01840	Glyma01g01840	Glyma01g01840	Gm01:1399714-1403226	byo-15-0	byo-15-14	OK	2.52571	3.00125	0.248871	-0.316989	0.751252	0.948496	no
Glyma01g01850	Glyma01g01850	Glyma01g01850	Gm01:1409321-1416077	byo-15-0	byo-15-14	OK	0.98369	0.919632	-0.0971478	0.14075	0.888067	0.98075	no
Glyma01g01860	Glyma01g01860	Glyma01g01860	Gm01:1432595-1439227	byo-15-0	byo-15-14	OK	3.34338	2.92249	-0.19411	0.320533	0.748564	0.947869	no
Glyma01g01875	Glyma01g01875	Glyma01g01875	Gm01:1464340-1468599	byo-15-0	byo-15-14	OK	7.3052	4.40816	-0.728745	1.14684	0.251447	0.651563	no
Glyma01g01890	Glyma01g01890	Glyma01g01890	Gm01:1483775-1488285	byo-15-0	byo-15-14	OK	20.9673	17.5518	-0.25652	0.451551	0.651593	0.920678	no
Glyma01g01900	Glyma01g01900	Glyma01g01900	Gm01:1489317-1495820	byo-15-0	byo-15-14	OK	16.7611	15.7221	-0.0923299	0.137029	0.891008	0.980964	no
Glyma01g01910	Glyma01g01910	Glyma01g01910	Gm01:1500824-1504087	byo-15-0	byo-15-14	OK	185.531	85.1448	-1.12367	1.31419	0.188782	0.570471	no
Glyma01g01920	Glyma01g01920	Glyma01g01920	Gm01:1504880-1510358	byo-15-0	byo-15-14	NOTEST	0.0951451	0.139992	0.557147	-0.546931	0.584426	1	no
Glyma01g01930	Glyma01g01930	Glyma01g01930	Gm01:1511111-1512857	byo-15-0	byo-15-14	OK	3.66419	3.87083	0.0791479	-0.106384	0.915277	0.98553	no
Glyma01g01940	Glyma01g01940	Glyma01g01940	Gm01:1514417-1515781	byo-15-0	byo-15-14	OK	11.8942	23.7961	1.00047	-1.75605	0.0790794	0.362373	no
Glyma01g01950	Glyma01g01950	Glyma01g01950	Gm01:1520439-1523995	byo-15-0	byo-15-14	OK	13.9173	11.4991	-0.275362	0.48729	0.626053	0.911686	no
Glyma01g01960	Glyma01g01960	Glyma01g01960	Gm01:1526003-1531395	byo-15-0	byo-15-14	OK	2.14336	1.15453	-0.892568	1.24312	0.213822	0.603878	no
Glyma01g01970	Glyma01g01970	Glyma01g01970	Gm01:1532782-1536385	byo-15-0	byo-15-14	OK	1.52145	1.82693	0.263978	-0.241481	0.809183	0.963059	no
Glyma01g01980	Glyma01g01980	Glyma01g01980	Gm01:1537139-1538153	byo-15-0	byo-15-14	NOTEST	0.0854152	0.0352369	-1.27741	0.597703	0.550038	1	no
Glyma01g01990	Glyma01g01990	Glyma01g01990	Gm01:1540562-1544363	byo-15-0	byo-15-14	OK	5.80499	5.84137	0.00901354	-0.0158494	0.987354	0.99827	no
Glyma01g02020	Glyma01g02020	Glyma01g02020	Gm01:1547972-1555699	byo-15-0	byo-15-14	LOWDATA	0.179018	0.380346	1.08721	0	1	1	no
Glyma01g02031	Glyma01g02031	Glyma01g02031	Gm01:1547972-1555699	byo-15-0	byo-15-14	NOTEST	0.10089	0.332456	1.72039	-1.79714	0.0723137	1	no
Glyma01g02040	Glyma01g02040	Glyma01g02040	Gm01:1558849-1560186	byo-15-0	byo-15-14	OK	5.68297	2.47156	-1.20122	1.59659	0.110358	0.433192	no
Glyma01g02050	Glyma01g02050	Glyma01g02050	Gm01:1564664-1568931	byo-15-0	byo-15-14	OK	2.14622	1.80852	-0.24699	0.331997	0.739891	0.945384	no
Glyma01g02060	Glyma01g02060	Glyma01g02060	Gm01:1577696-1587475	byo-15-0	byo-15-14	OK	9.6219	7.86338	-0.291172	0.504878	0.613645	0.906763	no
Glyma01g02070	Glyma01g02070	Glyma01g02070	Gm01:1596899-1599449	byo-15-0	byo-15-14	NOTEST	0.131351	0.410086	1.6425	-1.48602	0.137273	1	no
Glyma01g02080	Glyma01g02080	Glyma01g02080	Gm01:1603349-1604459	byo-15-0	byo-15-14	NOTEST	0	0	0	0	1	1	no
Glyma01g02090	Glyma01g02090	Glyma01g02090	Gm01:1613117-1616592	byo-15-0	byo-15-14	OK	23.0689	18.6704	-0.305201	0.539947	0.589234	0.895757	no
Glyma01g02100	Glyma01g02100	Glyma01g02100	Gm01:1618639-1623534	byo-15-0	byo-15-14	OK	3.5882	5.31397	0.566531	-0.973734	0.330188	0.732576	no
Glyma01g02110	Glyma01g02110	Glyma01g02110	Gm01:1626846-1628287	byo-15-0	byo-15-14	OK	5.42758	7.19336	0.406357	-0.598282	0.549652	0.879333	no
Glyma01g02120	Glyma01g02120	Glyma01g02120	Gm01:1633690-1637207	byo-15-0	byo-15-14	OK	18.5586	12.2156	-0.603365	1.06916	0.284996	0.688652	no
Glyma01g02130	Glyma01g02130	Glyma01g02130	Gm01:1642576-1643443	byo-15-0	byo-15-14	NOTEST	0	0	0	0	1	1	no
Glyma01g02140	Glyma01g02140	Glyma01g02140	Gm01:1648084-1649989	byo-15-0	byo-15-14	NOTEST	0	0.384115	1.79769e+308	1.79769e+308	0.0178667	1	no
Glyma01g02150	Glyma01g02150	Glyma01g02150	Gm01:1653306-1656923	byo-15-0	byo-15-14	OK	34.2144	33.8467	-0.0155897	0.0266407	0.978746	0.996383	no
Glyma01g02160	Glyma01g02160	Glyma01g02160	Gm01:1662473-1663732	byo-15-0	byo-15-14	NOTEST	0	0	0	0	1	1	no
Glyma01g02171	Glyma01g02171	Glyma01g02171	Gm01:1673102-1673545	byo-15-0	byo-15-14	NOTEST	0	0	0	0	1	1	no
Glyma01g02180	Glyma01g02180	Glyma01g02180	Gm01:1688059-1691046	byo-15-0	byo-15-14	OK	34.4293	6.81495	-2.33686	3.9783	6.94097e-05	0.00274151	yes
Glyma01g02190	Glyma01g02190	Glyma01g02190	Gm01:1721264-1722533	byo-15-0	byo-15-14	OK	7.97962	3.51789	-1.18161	1.62415	0.104344	0.422577	no
Glyma01g02200	Glyma01g02200	Glyma01g02200	Gm01:1733389-1734562	byo-15-0	byo-15-14	OK	6.60472	5.50963	-0.261541	0.427697	0.668872	0.926153	no
Glyma01g02215	Glyma01g02215	Glyma01g02215	Gm01:1735229-1736763	byo-15-0	byo-15-14	OK	4.04349	20.7871	2.36202	-3.20054	0.00137171	0.0250435	yes
Glyma01g02230	Glyma01g02230	Glyma01g02230	Gm01:1744296-1745378	byo-15-0	byo-15-14	OK	20.4867	12.815	-0.676859	1.07972	0.280268	0.683277	no
Glyma01g02235	Glyma01g02235	Glyma01g02235	Gm01:1747643-1748703	byo-15-0	byo-15-14	NOTEST	0	0.176823	1.79769e+308	1.79769e+308	0.210186	1	no
Glyma01g02240	Glyma01g02240	Glyma01g02240	Gm01:1748705-1753242	byo-15-0	byo-15-14	OK	1.75308	2.34138	0.417467	-0.664449	0.506403	0.855516	no
Glyma01g02251	Glyma01g02251	Glyma01g02251	Gm01:1771935-1773875	byo-15-0	byo-15-14	OK	23.1255	18.3909	-0.330489	0.558316	0.576628	0.891125	no
Glyma01g02260	Glyma01g02260	Glyma01g02260	Gm01:1781864-1782671	byo-15-0	byo-15-14	NOTEST	0.3401	0	-1.79769e+308	-1.79769e+308	0.0347715	1	no
Glyma01g02270	Glyma01g02270	Glyma01g02270	Gm01:1782704-1786280	byo-15-0	byo-15-14	OK	1.96785	2.03476	0.048233	-0.0564896	0.954952	0.993476	no
Glyma01g02280	Glyma01g02280	Glyma01g02280	Gm01:1788990-1791158	byo-15-0	byo-15-14	OK	5.02712	5.3447	0.0883755	-0.150743	0.880179	0.978104	no
Glyma01g02290	Glyma01g02290	Glyma01g02290	Gm01:1803011-1804370	byo-15-0	byo-15-14	OK	6.05524	4.87845	-0.311762	0.509667	0.610285	0.905162	no
Glyma01g02295	Glyma01g02295	Glyma01g02295	Gm01:1813531-1816390	byo-15-0	byo-15-14	NOTEST	0	0	0	0	1	1	no
Glyma01g02300	Glyma01g02300	Glyma01g02300	Gm01:1817115-1820935	byo-15-0	byo-15-14	NOTEST	0.282468	0.196299	-0.525029	0.516046	0.605822	1	no
Glyma01g02310	Glyma01g02310	Glyma01g02310	Gm01:1822915-1823629	byo-15-0	byo-15-14	NOTEST	0	0	0	0	1	1	no
Glyma01g02321	Glyma01g02321	Glyma01g02321	Gm01:1825753-1835393	byo-15-0	byo-15-14	OK	12.8481	8.75256	-0.55378	0.885931	0.375655	0.771167	no
Glyma01g02330	Glyma01g02330	Glyma01g02330	Gm01:1838125-1845872	byo-15-0	byo-15-14	OK	1.2531	3.46348	1.46673	-2.31062	0.0208536	0.160239	no
Glyma01g02340	Glyma01g02340	Glyma01g02340	Gm01:1865275-1868142	byo-15-0	byo-15-14	OK	3.11894	2.77511	-0.168509	0.284516	0.776015	0.955139	no
Glyma01g02350	Glyma01g02350	Glyma01g02350	Gm01:1886187-1890464	byo-15-0	byo-15-14	OK	5.36058	6.23735	0.218543	-0.364274	0.715653	0.938436	no
Glyma01g02360	Glyma01g02360	Glyma01g02360	Gm01:1905414-1906471	byo-15-0	byo-15-14	OK	0.195197	0.573707	1.55538	-1.39291	0.163649	0.531406	no
Glyma01g02380	Glyma01g02380	Glyma01g02380	Gm01:1929549-1932204	byo-15-0	byo-15-14	OK	0.401806	1.59614	1.99002	-2.55961	0.0104789	0.103759	no
Glyma01g02390	Glyma01g02390	Glyma01g02390	Gm01:1940680-1942652	byo-15-0	byo-15-14	OK	1.60972	2.1481	0.416258	-0.557516	0.577175	0.891298	no
Glyma01g02400	Glyma01g02400	Glyma01g02400	Gm01:1969464-1975586	byo-15-0	byo-15-14	OK	30.9331	41.3837	0.419909	-0.628333	0.529786	0.868262	no
Glyma01g02420	Glyma01g02420	Glyma01g02420	Gm01:1977639-1982632	byo-15-0	byo-15-14	OK	3.44182	6.52902	0.923693	-1.54335	0.122746	0.458429	no
Glyma01g02435	Glyma01g02435	Glyma01g02435	Gm01:1989327-1993130	byo-15-0	byo-15-14	NOTEST	0	0	0	0	1	1	no
Glyma01g02451	Glyma01g02451	Glyma01g02451	Gm01:1998300-2009388	byo-15-0	byo-15-14	NOTEST	0.0427692	0.0427259	-0.00146306	0.000438149	0.99965	1	no
Glyma01g02465	Glyma01g02465	Glyma01g02465	Gm01:1998300-2009388	byo-15-0	byo-15-14	OK	6.95541	6.19596	-0.166807	0.210568	0.833224	0.96703	no
Glyma01g02480	Glyma01g02480	Glyma01g02480	Gm01:2010099-2018636	byo-15-0	byo-15-14	OK	46.2219	19.6832	-1.23161	1.96279	0.0496702	0.274056	no
Glyma01g02510	Glyma01g02510	Glyma01g02510	Gm01:2033797-2034792	byo-15-0	byo-15-14	NOTEST	0.102611	0.0413893	-1.30985	0.612885	0.539953	1	no
Glyma01g02525	Glyma01g02525	Glyma01g02525	Gm01:2038298-2054214	byo-15-0	byo-15-14	NOTEST	0	0	0	0	1	1	no
Glyma01g02540	Glyma01g02540	Glyma01g02540	Gm01:2065426-2066242	byo-15-0	byo-15-14	NOTEST	0	0	0	0	1	1	no
Glyma01g02550	Glyma01g02550	Glyma01g02550	Gm01:2067340-2068207	byo-15-0	byo-15-14	NOTEST	0	0	0	0	1	1	no
Glyma01g02560	Glyma01g02560	Glyma01g02560	Gm01:2089449-2097520	byo-15-0	byo-15-14	NOTEST	0.0309516	0.0751492	1.27975	-0.896582	0.369942	1	no
Glyma01g02570	Glyma01g02570	Glyma01g02570	Gm01:2102150-2107115	byo-15-0	byo-15-14	OK	4.33549	3.03696	-0.513568	0.811579	0.417033	0.801678	no
Glyma01g02580	Glyma01g02580	Glyma01g02580	Gm01:2119856-2122838	byo-15-0	byo-15-14	OK	0.725733	39.5296	5.76735	-7.88555	3.10862e-15	4.79439e-12	yes
Glyma01g02610	Glyma01g02610	Glyma01g02610	Gm01:2137616-2139436	byo-15-0	byo-15-14	OK	0.322738	0.845619	1.38965	-1.61066	0.107253	0.429195	no
Glyma01g02620	Glyma01g02620	Glyma01g02620	Gm01:2146050-2152449	byo-15-0	byo-15-14	NOTEST	0.0958462	0.0384101	-1.31923	1.18148	0.237412	1	no
Glyma01g02630	Glyma01g02630	Glyma01g02630	Gm01:2156930-2161301	byo-15-0	byo-15-14	OK	6.48305	3.50278	-0.888173	1.45426	0.145875	0.500072	no
Glyma01g02640	Glyma01g02640	Glyma01g02640	Gm01:2168404-2173706	byo-15-0	byo-15-14	OK	5.40877	6.00229	0.150214	-0.253639	0.799775	0.96176	no
Glyma01g02660	Glyma01g02660	Glyma01g02660	Gm01:2184322-2188837	byo-15-0	byo-15-14	OK	6.40313	5.33913	-0.262174	0.408834	0.682662	0.92938	no
Glyma01g02670	Glyma01g02670	Glyma01g02670	Gm01:2192165-2194689	byo-15-0	byo-15-14	OK	13.1876	5.43465	-1.27892	2.23732	0.0252657	0.180602	no
Glyma01g02691	Glyma01g02691	Glyma01g02691	Gm01:2199760-2201127	byo-15-0	byo-15-14	OK	1.37656	0.490731	-1.48806	1.62554	0.104047	0.422024	no
Glyma01g02710	Glyma01g02710	Glyma01g02710	Gm01:2204078-2206129	byo-15-0	byo-15-14	NOTEST	0	0	0	0	1	1	no
Glyma01g02720	Glyma01g02720	Glyma01g02720	Gm01:2204078-2206129	byo-15-0	byo-15-14	OK	45.8871	19.8449	-1.20932	2.10952	0.0348995	0.220529	no
Glyma01g02740	Glyma01g02740	Glyma01g02740	Gm01:2209772-2211864	byo-15-0	byo-15-14	NOTEST	0.339586	0.212455	-0.676617	0.706165	0.480085	1	no
Glyma01g02750	Glyma01g02750	Glyma01g02750	Gm01:2228817-2234268	byo-15-0	byo-15-14	OK	0.586765	0.583626	-0.00773792	0.00942957	0.992476	0.999047	no
Glyma01g02760	Glyma01g02760	Glyma01g02760	Gm01:2239126-2244480	byo-15-0	byo-15-14	NOTEST	0.0904037	0.109568	0.277373	-0.249798	0.802744	1	no
Glyma01g02780	Glyma01g02780	Glyma01g02780	Gm01:2274285-2279870	byo-15-0	byo-15-14	OK	5.82651	7.06425	0.277904	-0.494072	0.621256	0.909605	no
Glyma01g02790	Glyma01g02790	Glyma01g02790	Gm01:2280412-2286189	byo-15-0	byo-15-14	OK	0.159589	0.499333	1.64564	-1.61811	0.105639	0.425552	no
Glyma01g02800	Glyma01g02800	Glyma01g02800	Gm01:2289835-2296934	byo-15-0	byo-15-14	OK	1.1775	3.05039	1.37326	-2.13918	0.0324208	0.210556	no
Glyma01g02810	Glyma01g02810	Glyma01g02810	Gm01:2296971-2301386	byo-15-0	byo-15-14	NOTEST	0.093633	0.1312	0.486677	-0.493838	0.62142	1	no
Glyma01g02820	Glyma01g02820	Glyma01g02820	Gm01:2307249-2310533	byo-15-0	byo-15-14	OK	9.0594	9.98198	0.139912	-0.243342	0.807741	0.962586	no
Glyma01g02830	Glyma01g02830	Glyma01g02830	Gm01:2320650-2323809	byo-15-0	byo-15-14	NOTEST	0	0.0120759	1.79769e+308	1.79769e+308	0.316518	1	no
Glyma01g02840	Glyma01g02840	Glyma01g02840	Gm01:2324547-2332128	byo-15-0	byo-15-14	OK	21.6657	3.91475	-2.46842	3.94877	7.85529e-05	0.00300017	yes
Glyma01g02850	Glyma01g02850	Glyma01g02850	Gm01:2336135-2340956	byo-15-0	byo-15-14	OK	51.0508	41.4059	-0.302097	0.406805	0.684151	0.929537	no
Glyma01g02880	Glyma01g02880	Glyma01g02880	Gm01:2360197-2366406	byo-15-0	byo-15-14	OK	14.7775	5.9991	-1.30058	1.96248	0.0497068	0.27412	no
Glyma01g02890	Glyma01g02890	Glyma01g02890	Gm01:2373884-2395585	byo-15-0	byo-15-14	OK	1.42983	2.03792	0.511251	-0.85123	0.394642	0.785742	no
Glyma01g02900	Glyma01g02900	Glyma01g02900	Gm01:2398001-2407368	byo-15-0	byo-15-14	OK	1.5979	1.12869	-0.501527	0.602211	0.547034	0.877432	no
Glyma01g02920	Glyma01g02920	Glyma01g02920	Gm01:2419558-2420449	byo-15-0	byo-15-14	OK	1.34123	2.14482	0.6773	-0.85966	0.389976	0.781888	no
Glyma01g02930	Glyma01g02930	Glyma01g02930	Gm01:2424756-2426304	byo-15-0	byo-15-14	NOTEST	0.164507	0.266947	0.698407	-0.601352	0.547606	1	no
Glyma01g02941	Glyma01g02941	Glyma01g02941	Gm01:2426753-2435682	byo-15-0	byo-15-14	OK	3.00388	2.23136	-0.428908	0.727259	0.467067	0.832562	no
Glyma01g02950	Glyma01g02950	Glyma01g02950	Gm01:2448362-2450139	byo-15-0	byo-15-14	OK	52.8466	46.6255	-0.180693	0.28489	0.775729	0.955139	no
Glyma01g02963	Glyma01g02963	Glyma01g02963	Gm01:2455817-2458234	byo-15-0	byo-15-14	NOTEST	0.0182847	0.00500974	-1.86783	0.487649	0.625798	1	no
Glyma01g02976	Glyma01g02976	Glyma01g02976	Gm01:2465269-2466518	byo-15-0	byo-15-14	NOTEST	0	0	0	0	1	1	no
Glyma01g02990	Glyma01g02990	Glyma01g02990	Gm01:2477179-2479230	byo-15-0	byo-15-14	OK	2.46379	2.22461	-0.147322	0.204433	0.838015	0.968615	no
Glyma01g03005	Glyma01g03005	Glyma01g03005	Gm01:2495435-2497366	byo-15-0	byo-15-14	NOTEST	0.291276	0.114198	-1.35085	1.25439	0.209702	1	no
Glyma01g03020	Glyma01g03020	Glyma01g03020	Gm01:2497579-2500150	byo-15-0	byo-15-14	OK	12.0259	11.1824	-0.104925	0.182144	0.855469	0.973023	no
Glyma01g03030	Glyma01g03030	Glyma01g03030	Gm01:2522226-2524933	byo-15-0	byo-15-14	OK	2.34027	1.52542	-0.617468	0.888567	0.374236	0.769984	no
Glyma01g03040	Glyma01g03040	Glyma01g03040	Gm01:2530562-2537849	byo-15-0	byo-15-14	NOTEST	0.229421	0.403958	0.816208	-0.845869	0.397626	1	no
Glyma01g03050	Glyma01g03050	Glyma01g03050	Gm01:2543533-2544636	byo-15-0	byo-15-14	NOTEST	0	0	0	0	1	1	no
Glyma01g03060	Glyma01g03060	Glyma01g03060	Gm01:2551019-2553294	byo-15-0	byo-15-14	NOTEST	0.18107	0.180016	-0.0084163	0.00821721	0.993444	1	no
Glyma01g03070	Glyma01g03070	Glyma01g03070	Gm01:2585415-2586673	byo-15-0	byo-15-14	OK	290.262	558.345	0.9438	-1.1587	0.24658	0.645981	no
Glyma01g03090	Glyma01g03090	Glyma01g03090	Gm01:2600263-2605224	byo-15-0	byo-15-14	OK	12.912	1.79673	-2.84527	4.54125	5.59213e-06	0.000367879	yes
Glyma01g03100	Glyma01g03100	Glyma01g03100	Gm01:2633476-2636259	byo-15-0	byo-15-14	OK	2.73708	5.14449	0.910392	-1.47208	0.140999	0.491516	no
Glyma01g03110	Glyma01g03110	Glyma01g03110	Gm01:2667742-2669323	byo-15-0	byo-15-14	NOTEST	0	0.0244778	1.79769e+308	1.79769e+308	0.319259	1	no
Glyma01g03120	Glyma01g03120	Glyma01g03120	Gm01:2683531-2686001	byo-15-0	byo-15-14	OK	3.15981	4.78321	0.598144	-0.923632	0.355678	0.754913	no
Glyma01g03130	Glyma01g03130	Glyma01g03130	Gm01:2686762-2690092	byo-15-0	byo-15-14	OK	3.29593	2.91863	-0.175395	0.284579	0.775967	0.955139	no
Glyma01g03140	Glyma01g03140	Glyma01g03140	Gm01:2696508-2700015	byo-15-0	byo-15-14	LOWDATA	0	0	-0.559482	0	1	1	no
Glyma01g03150	Glyma01g03150	Glyma01g03150	Gm01:2696508-2700015	byo-15-0	byo-15-14	OK	25.7964	17.504	-0.559482	0.858965	0.39036	0.782384	no
Glyma01g03160	Glyma01g03160	Glyma01g03160	Gm01:2716401-2724818	byo-15-0	byo-15-14	OK	37.0779	19.8383	-0.902272	1.36377	0.17264	0.546683	no
Glyma01g03180	Glyma01g03180	Glyma01g03180	Gm01:2725857-2728953	byo-15-0	byo-15-14	OK	40.9403	47.7209	0.221098	-0.361202	0.717948	0.938711	no
Glyma01g03190	Glyma01g03190	Glyma01g03190	Gm01:2731349-2739464	byo-15-0	byo-15-14	OK	1.82756	1.08302	-0.754862	1.0765	0.281702	0.684626	no
Glyma01g03200	Glyma01g03200	Glyma01g03200	Gm01:2741979-2744444	byo-15-0	byo-15-14	NOTEST	0	0	0	0	1	1	no
Glyma01g03210	Glyma01g03210	Glyma01g03210	Gm01:2749285-2751625	byo-15-0	byo-15-14	OK	0.677648	0.422143	-0.682803	0.840209	0.400791	0.789203	no
Glyma01g03220	Glyma01g03220	Glyma01g03220	Gm01:2752604-2755538	byo-15-0	byo-15-14	OK	4.7769	5.55346	0.217313	-0.367579	0.713187	0.937942	no
Glyma01g03240	Glyma01g03240	Glyma01g03240	Gm01:2765558-2766634	byo-15-0	byo-15-14	NOTEST	0	0.250998	1.79769e+308	1.79769e+308	0.0350186	1	no
Glyma01g03260	Glyma01g03260	Glyma01g03260	Gm01:2784884-2792465	byo-15-0	byo-15-14	OK	832.977	376.725	-1.14476	0.984272	0.324982	0.727804	no
Glyma01g03270	Glyma01g03270	Glyma01g03270	Gm01:2803081-2807357	byo-15-0	byo-15-14	OK	6.21655	5.76474	-0.10886	0.186006	0.85244	0.972491	no
Glyma01g03281	Glyma01g03281	Glyma01g03281	Gm01:2811064-2811250	byo-15-0	byo-15-14	NOTEST	0	0	0	0	1	1	no
Glyma01g03290	Glyma01g03290	Glyma01g03290	Gm01:2814292-2814876	byo-15-0	byo-15-14	NOTEST	0	0	0	0	1	1	no
Glyma01g03301	Glyma01g03301	Glyma01g03301	Gm01:2815679-2817384	byo-15-0	byo-15-14	NOTEST	0	0	0	0	1	1	no
Glyma01g03310	Glyma01g03310	Glyma01g03310	Gm01:2820282-2822588	byo-15-0	byo-15-14	NOTEST	0	0	0	0	1	1	no
Glyma01g03321	Glyma01g03321	Glyma01g03321	Gm01:2825602-2830330	byo-15-0	byo-15-14	NOTEST	0	0	0	0	1	1	no
Glyma01g03330	Glyma01g03330	Glyma01g03330	Gm01:2836050-2840937	byo-15-0	byo-15-14	OK	5.03478	4.23625	-0.24914	0.418106	0.67587	0.928411	no
Glyma01g03340	Glyma01g03340	Glyma01g03340	Gm01:2843206-2846996	byo-15-0	byo-15-14	NOTEST	0	0	0	0	1	1	no
Glyma01g03360	Glyma01g03360	Glyma01g03360	Gm01:2857640-2860816	byo-15-0	byo-15-14	OK	16.9345	2.24125	-2.91759	4.06166	4.8726e-05	0.00208198	yes
Glyma01g03371	Glyma01g03371	Glyma01g03371	Gm01:2868081-2871591	byo-15-0	byo-15-14	NOTEST	0.199815	0.229007	0.196726	-0.149207	0.88139	1	no
Glyma01g03380	Glyma01g03380	Glyma01g03380	Gm01:2872827-2875983	byo-15-0	byo-15-14	OK	5.07435	8.77814	0.790692	-1.28946	0.197239	0.582394	no
Glyma01g03390	Glyma01g03390	Glyma01g03390	Gm01:2879282-2884236	byo-15-0	byo-15-14	OK	1.61635	0.548165	-1.56006	2.057	0.039686	0.239135	no
Glyma01g03400	Glyma01g03400	Glyma01g03400	Gm01:2895941-2899203	byo-15-0	byo-15-14	NOTEST	0.0520861	0.0846242	0.70017	-0.475984	0.634086	1	no
Glyma01g03410	Glyma01g03410	Glyma01g03410	Gm01:2907608-2911173	byo-15-0	byo-15-14	NOTEST	0	0	0	0	1	1	no
Glyma01g03420	Glyma01g03420	Glyma01g03420	Gm01:2912689-2918182	byo-15-0	byo-15-14	OK	2.53427	1.7041	-0.572562	0.852788	0.393777	0.785178	no
Glyma01g03430	Glyma01g03430	Glyma01g03430	Gm01:2918596-2922169	byo-15-0	byo-15-14	OK	11.5681	6.2651	-0.884741	1.4565	0.145254	0.498888	no
Glyma01g03450	Glyma01g03450	Glyma01g03450	Gm01:2932298-2941083	byo-15-0	byo-15-14	NOTEST	0.264201	0	-1.79769e+308	-1.79769e+308	0.0224927	1	no
Glyma01g03470	Glyma01g03470	Glyma01g03470	Gm01:2983533-2985063	byo-15-0	byo-15-14	OK	1.22795	0.925826	-0.407437	0.444842	0.656434	0.922408	no
Glyma01g03480	Glyma01g03480	Glyma01g03480	Gm01:2985878-2990726	byo-15-0	byo-15-14	OK	2.17551	2.71102	0.317483	-0.494653	0.620845	0.90949	no
Glyma01g03490	Glyma01g03490	Glyma01g03490	Gm01:2997710-3004125	byo-15-0	byo-15-14	OK	5.71003	5.63426	-0.0192728	0.034087	0.972808	0.995815	no
Glyma01g03500	Glyma01g03500	Glyma01g03500	Gm01:3020777-3022182	byo-15-0	byo-15-14	OK	2.89712	4.61507	0.671733	-1.0616	0.288416	0.692671	no
Glyma01g03530	Glyma01g03530	Glyma01g03530	Gm01:3043747-3048064	byo-15-0	byo-15-14	OK	15.877	16.3291	0.0405047	-0.0714965	0.943003	0.991078	no
Glyma01g03540	Glyma01g03540	Glyma01g03540	Gm01:3063216-3065991	byo-15-0	byo-15-14	OK	11.2492	9.71868	-0.210996	0.368356	0.712608	0.937898	no
Glyma01g03550	Glyma01g03550	Glyma01g03550	Gm01:3067764-3073752	byo-15-0	byo-15-14	OK	29.0786	12.8266	-1.18082	2.08142	0.0373952	0.230609	no
Glyma01g03570	Glyma01g03570	Glyma01g03570	Gm01:3082363-3083185	byo-15-0	byo-15-14	OK	211.955	238.614	0.170918	-0.242833	0.808135	0.962662	no
Glyma01g03580	Glyma01g03580	Glyma01g03580	Gm01:3090805-3093412	byo-15-0	byo-15-14	OK	0.854934	0.707584	-0.272912	0.308579	0.757642	0.950287	no
Glyma01g03590	Glyma01g03590	Glyma01g03590	Gm01:3106546-3108525	byo-15-0	byo-15-14	OK	13.1712	24.8397	0.915263	-1.54542	0.122245	0.457296	no
Glyma01g03600	Glyma01g03600	Glyma01g03600	Gm01:3114320-3119083	byo-15-0	byo-15-14	OK	11.7983	4.62364	-1.35148	1.98403	0.047252	0.266524	no
Glyma01g03610	Glyma01g03610	Glyma01g03610	Gm01:3120584-3124029	byo-15-0	byo-15-14	OK	18.2647	17.0111	-0.102584	0.182368	0.855294	0.973023	no
Glyma01g03621	Glyma01g03621	Glyma01g03621	Gm01:3124253-3126137	byo-15-0	byo-15-14	OK	0.83636	0.470858	-0.828833	0.879057	0.37937	0.774551	no
Glyma01g03630	Glyma01g03630	Glyma01g03630	Gm01:3127061-3127831	byo-15-0	byo-15-14	NOTEST	0	0	0	0	1	1	no
Glyma01g03650	Glyma01g03650	Glyma01g03650	Gm01:3132200-3135385	byo-15-0	byo-15-14	OK	49.2152	41.6386	-0.241184	0.377242	0.705994	0.935855	no
Glyma01g03661	Glyma01g03661	Glyma01g03661	Gm01:3135687-3141621	byo-15-0	byo-15-14	NOTEST	0	0.0367697	1.79769e+308	1.79769e+308	0.16505	1	no
Glyma01g03670	Glyma01g03670	Glyma01g03670	Gm01:3144701-3145778	byo-15-0	byo-15-14	OK	0.431033	2.11344	2.29372	-2.55113	0.0107374	0.105607	no
Glyma01g03690	Glyma01g03690	Glyma01g03690	Gm01:3152038-3157769	byo-15-0	byo-15-14	NOTEST	0	0	0	0	1	1	no
Glyma01g03700	Glyma01g03700	Glyma01g03700	Gm01:3162858-3164334	byo-15-0	byo-15-14	OK	2.64133	0.972475	-1.44153	1.93722	0.0527185	0.284243	no
Glyma01g03710	Glyma01g03710	Glyma01g03710	Gm01:3167711-3172458	byo-15-0	byo-15-14	OK	4.08634	3.10084	-0.398151	0.560919	0.574853	0.890295	no
Glyma01g03720	Glyma01g03720	Glyma01g03720	Gm01:3174000-3185126	byo-15-0	byo-15-14	OK	142.353	52.5542	-1.43759	2.01192	0.0442283	0.256622	no
Glyma01g03730	Glyma01g03730	Glyma01g03730	Gm01:3187344-3190927	byo-15-0	byo-15-14	OK	15.9622	15.2898	-0.06209	0.109004	0.913199	0.985196	no
Glyma01g03750	Glyma01g03750	Glyma01g03750	Gm01:3193903-3200492	byo-15-0	byo-15-14	OK	22.5484	20.8076	-0.115913	0.206163	0.836663	0.968542	no
Glyma01g03760	Glyma01g03760	Glyma01g03760	Gm01:3219159-3222449	byo-15-0	byo-15-14	OK	4.8544	12.0855	1.31591	-2.30839	0.0209776	0.160951	no
Glyma01g03780	Glyma01g03780	Glyma01g03780	Gm01:3233213-3235819	byo-15-0	byo-15-14	OK	0	2.7703	1.79769e+308	1.79769e+308	0.0350186	0.220529	no
Glyma01g03790	Glyma01g03790	Glyma01g03790	Gm01:3242605-3245458	byo-15-0	byo-15-14	NOTEST	0.142001	0.0243057	-2.54653	1.74868	0.0803467	1	no
Glyma01g03810	Glyma01g03810	Glyma01g03810	Gm01:3249405-3255967	byo-15-0	byo-15-14	OK	14.3905	16.4341	0.191579	-0.297188	0.766323	0.952565	no
Glyma01g03820	Glyma01g03820	Glyma01g03820	Gm01:3263267-3267637	byo-15-0	byo-15-14	OK	6.41181	3.59987	-0.832789	1.41417	0.157313	0.520853	no
Glyma01g03830	Glyma01g03830	Glyma01g03830	Gm01:3283632-3286899	byo-15-0	byo-15-14	OK	9.06493	15.2684	0.752179	-1.31757	0.187648	0.568899	no
Glyma01g03850	Glyma01g03850	Glyma01g03850	Gm01:3312867-3318968	byo-15-0	byo-15-14	OK	1.19974	1.92209	0.679958	-1.00618	0.314327	0.71916	no
Glyma01g03870	Glyma01g03870	Glyma01g03870	Gm01:3327064-3332585	byo-15-0	byo-15-14	OK	3.66091	3.87281	0.0811791	-0.140273	0.888444	0.98075	no
Glyma01g03880	Glyma01g03880	Glyma01g03880	Gm01:3348917-3352335	byo-15-0	byo-15-14	OK	0.96885	5.07383	2.38873	-3.59381	0.000325881	0.0089446	yes
Glyma01g03890	Glyma01g03890	Glyma01g03890	Gm01:3359534-3372620	byo-15-0	byo-15-14	OK	5.9398	3.93828	-0.592846	1.04432	0.296336	0.70126	no
Glyma01g03900	Glyma01g03900	Glyma01g03900	Gm01:3378305-3380122	byo-15-0	byo-15-14	NOTEST	0.103413	0.34047	1.71911	-1.56859	0.116744	1	no
Glyma01g03910	Glyma01g03910	Glyma01g03910	Gm01:3381988-3384388	byo-15-0	byo-15-14	OK	1.02794	0.521308	-0.979542	1.1352	0.25629	0.657718	no
Glyma01g03921	Glyma01g03921	Glyma01g03921	Gm01:3390102-3396781	byo-15-0	byo-15-14	NOTEST	0.103468	0.109234	0.0782266	-0.0669698	0.946606	1	no
Glyma01g03930	Glyma01g03930	Glyma01g03930	Gm01:3400476-3411080	byo-15-0	byo-15-14	OK	19.3126	24.9382	0.368812	-0.611586	0.540812	0.874515	no
Glyma01g03940	Glyma01g03940	Glyma01g03940	Gm01:3413504-3415979	byo-15-0	byo-15-14	NOTEST	0.0940071	0.345471	1.87772	-1.71331	0.0866555	1	no
Glyma01g03948	Glyma01g03948	Glyma01g03948	Gm01:3423773-3425166	byo-15-0	byo-15-14	OK	0.717318	0.540464	-0.408414	0.398434	0.69031	0.930946	no
Glyma01g03956	Glyma01g03956	Glyma01g03956	Gm01:3431068-3433014	byo-15-0	byo-15-14	OK	9.15468	7.02876	-0.381239	0.623434	0.532999	0.870012	no
Glyma01g03964	Glyma01g03964	Glyma01g03964	Gm01:3433091-3436594	byo-15-0	byo-15-14	OK	1.30937	0.856382	-0.612547	0.86542	0.386808	0.780112	no
Glyma01g03972	Glyma01g03972	Glyma01g03972	Gm01:3439667-3441084	byo-15-0	byo-15-14	NOTEST	0	0	0	0	1	1	no
Glyma01g03980	Glyma01g03980	Glyma01g03980	Gm01:3455191-3461955	byo-15-0	byo-15-14	OK	0.87618	0.746375	-0.231327	0.346863	0.728694	0.942567	no
Glyma01g04000	Glyma01g04000	Glyma01g04000	Gm01:3487914-3494204	byo-15-0	byo-15-14	OK	0.464695	0.239962	-0.95348	1.19339	0.232717	0.628943	no
Glyma01g04015	Glyma01g04015	Glyma01g04015	Gm01:3502393-3507947	byo-15-0	byo-15-14	NOTEST	0.27655	0.138154	-1.00127	0.880636	0.378515	1	no
Glyma01g04030	Glyma01g04030	Glyma01g04030	Gm01:3513144-3513438	byo-15-0	byo-15-14	NOTEST	0	0	0	0	1	1	no
Glyma01g04040	Glyma01g04040	Glyma01g04040	Gm01:3514698-3521382	byo-15-0	byo-15-14	OK	2.56285	2.40873	-0.0894767	0.12283	0.902242	0.982839	no
Glyma01g04050	Glyma01g04050	Glyma01g04050	Gm01:3524004-3527778	byo-15-0	byo-15-14	OK	85.8729	25.6792	-1.7416	2.91245	0.00358605	0.0504101	no
Glyma01g04060	Glyma01g04060	Glyma01g04060	Gm01:3533389-3537718	byo-15-0	byo-15-14	OK	4.3034	8.99924	1.06433	-1.76385	0.0777564	0.359255	no
Glyma01g04070	Glyma01g04070	Glyma01g04070	Gm01:3541049-3543307	byo-15-0	byo-15-14	OK	6.04528	19.9251	1.7207	-2.80948	0.00496223	0.06278	no
Glyma01g04080	Glyma01g04080	Glyma01g04080	Gm01:3552334-3560811	byo-15-0	byo-15-14	OK	0.790443	0.938496	0.24769	-0.219619	0.826168	0.965919	no
Glyma01g04090	Glyma01g04090	Glyma01g04090	Gm01:3552334-3560811	byo-15-0	byo-15-14	OK	2.44375	3.70237	0.599353	-0.731454	0.464502	0.832322	no
Glyma01g04100	Glyma01g04100	Glyma01g04100	Gm01:3565109-3567816	byo-15-0	byo-15-14	OK	4.50674	3.93005	-0.197538	0.332267	0.739688	0.945196	no
Glyma01g04107	Glyma01g04107	Glyma01g04107	Gm01:3570498-3572031	byo-15-0	byo-15-14	OK	1.11972	1.09074	-0.0378251	0.0443898	0.964594	0.994258	no
Glyma01g04114	Glyma01g04114	Glyma01g04114	Gm01:3573892-3576381	byo-15-0	byo-15-14	NOTEST	0	0	0	0	1	1	no
Glyma01g04122	Glyma01g04122	Glyma01g04122	Gm01:3576871-3579242	byo-15-0	byo-15-14	NOTEST	0.0995472	0.42562	2.09611	-1.93947	0.0524442	1	no
Glyma01g04130	Glyma01g04130	Glyma01g04130	Gm01:3588235-3590927	byo-15-0	byo-15-14	OK	24.4858	21.1913	-0.208473	0.360818	0.718235	0.938711	no
Glyma01g04140	Glyma01g04140	Glyma01g04140	Gm01:3593852-3595627	byo-15-0	byo-15-14	OK	7.42029	5.39278	-0.460446	0.75002	0.453243	0.826839	no
Glyma01g04151	Glyma01g04151	Glyma01g04151	Gm01:3601850-3604249	byo-15-0	byo-15-14	OK	3.52289	2.25975	-0.640597	0.985145	0.324553	0.727419	no
Glyma01g04160	Glyma01g04160	Glyma01g04160	Gm01:3614505-3619208	byo-15-0	byo-15-14	NOTEST	0	0.0524599	1.79769e+308	1.79769e+308	0.122534	1	no
Glyma01g04170	Glyma01g04170	Glyma01g04170	Gm01:3622380-3627999	byo-15-0	byo-15-14	OK	31.6165	17.5915	-0.845793	1.30154	0.193073	0.576019	no
Glyma01g04190	Glyma01g04190	Glyma01g04190	Gm01:3657972-3659933	byo-15-0	byo-15-14	OK	2.47554	3.01917	0.286409	-0.414924	0.678198	0.928911	no
Glyma01g04200	Glyma01g04200	Glyma01g04200	Gm01:3671722-3676091	byo-15-0	byo-15-14	NOTEST	0.0711428	0.0089267	-2.99452	1.52861	0.12636	1	no
Glyma01g04210	Glyma01g04210	Glyma01g04210	Gm01:3695969-3699966	byo-15-0	byo-15-14	LOWDATA	0	0	-1.79769e+308	0	1	1	no
Glyma01g04220	Glyma01g04220	Glyma01g04220	Gm01:3695969-3699966	byo-15-0	byo-15-14	OK	0.81165	0.368662	-1.13856	1.33391	0.182235	0.562009	no
Glyma01g04230	Glyma01g04230	Glyma01g04230	Gm01:3717479-3721262	byo-15-0	byo-15-14	OK	16.4935	14.898	-0.146779	0.260302	0.794631	0.960561	no
Glyma01g04241	Glyma01g04241	Glyma01g04241	Gm01:3734519-3735893	byo-15-0	byo-15-14	NOTEST	0.383122	0.126455	-1.59918	1.45188	0.146534	1	no
Glyma01g04250	Glyma01g04250	Glyma01g04250	Gm01:3750043-3752379	byo-15-0	byo-15-14	OK	2.42158	0.813989	-1.57287	2.19319	0.0282935	0.194379	no
Glyma01g04261	Glyma01g04261	Glyma01g04261	Gm01:3767622-3769840	byo-15-0	byo-15-14	NOTEST	0	0	0	0	1	1	no
Glyma01g04270	Glyma01g04270	Glyma01g04270	Gm01:3770398-3790851	byo-15-0	byo-15-14	OK	11.1249	8.22261	-0.436118	0.688651	0.491043	0.847695	no
Glyma01g04285	Glyma01g04285	Glyma01g04285	Gm01:3792928-3793735	byo-15-0	byo-15-14	NOTEST	0	0.248859	1.79769e+308	1.79769e+308	0.0535835	1	no
Glyma01g04300	Glyma01g04300	Glyma01g04300	Gm01:3800482-3805133	byo-15-0	byo-15-14	OK	3.26667	5.08777	0.639214	-0.946622	0.343831	0.745753	no
Glyma01g04310	Glyma01g04310	Glyma01g04310	Gm01:3839061-3840278	byo-15-0	byo-15-14	NOTEST	0	0	0	0	1	1	no
Glyma01g04320	Glyma01g04320	Glyma01g04320	Gm01:3843990-3851452	byo-15-0	byo-15-14	OK	12.5536	9.16975	-0.453144	0.772132	0.440036	0.817812	no
Glyma01g04330	Glyma01g04330	Glyma01g04330	Gm01:3875178-3876239	byo-15-0	byo-15-14	OK	0.177822	0.447628	1.33187	-0.827839	0.407762	0.794381	no
Glyma01g04335	Glyma01g04335	Glyma01g04335	Gm01:3875178-3876239	byo-15-0	byo-15-14	OK	3.09149	2.91511	-0.0847555	0.0361883	0.971132	0.995445	no
Glyma01g04340	Glyma01g04340	Glyma01g04340	Gm01:3894968-3896837	byo-15-0	byo-15-14	OK	4.25091	0.264848	-4.00454	4.84462	1.26854e-06	0.000107519	yes
Glyma01g04350	Glyma01g04350	Glyma01g04350	Gm01:3901049-3902869	byo-15-0	byo-15-14	OK	122.634	3.73022	-5.03896	7.58385	3.35287e-14	4.34371e-11	yes
Glyma01g04361	Glyma01g04361	Glyma01g04361	Gm01:3905975-3906745	byo-15-0	byo-15-14	NOTEST	0	0	0	0	1	1	no
Glyma01g04370	Glyma01g04370	Glyma01g04370	Gm01:3910797-3912019	byo-15-0	byo-15-14	OK	1.58696	0.0290181	-5.77317	3.08714	0.00202092	0.0336826	yes
Glyma01g04380	Glyma01g04380	Glyma01g04380	Gm01:3925166-3926952	byo-15-0	byo-15-14	OK	2.10889	1.14108	-0.886088	1.21839	0.223075	0.61599	no
Glyma01g04400	Glyma01g04400	Glyma01g04400	Gm01:3936729-3941417	byo-15-0	byo-15-14	OK	15.1179	9.12115	-0.728973	1.29054	0.196862	0.581642	no
Glyma01g04410	Glyma01g04410	Glyma01g04410	Gm01:3950636-3955032	byo-15-0	byo-15-14	OK	2.74508	1.65521	-0.729831	1.029	0.303478	0.707985	no
Glyma01g04421	Glyma01g04421	Glyma01g04421	Gm01:3965515-3967099	byo-15-0	byo-15-14	OK	0.937254	0.265185	-1.82144	1.8417	0.0655184	0.32328	no
Glyma01g04430	Glyma01g04430	Glyma01g04430	Gm01:3981173-3984324	byo-15-0	byo-15-14	NOTEST	0.202882	0.0618431	-1.71396	1.62494	0.104175	1	no
Glyma01g04440	Glyma01g04440	Glyma01g04440	Gm01:3984541-3989981	byo-15-0	byo-15-14	OK	3.59696	7.92503	1.13964	-1.86485	0.0622026	0.313364	no
Glyma01g04450	Glyma01g04450	Glyma01g04450	Gm01:3990476-3991986	byo-15-0	byo-15-14	OK	0.416804	0.934078	1.16417	-1.27303	0.203009	0.591015	no
Glyma01g04460	Glyma01g04460	Glyma01g04460	Gm01:3993484-3995564	byo-15-0	byo-15-14	OK	7.48537	12.515	0.741518	-1.31414	0.188798	0.570471	no
Glyma01g04468	Glyma01g04468	Glyma01g04468	Gm01:4005281-4011408	byo-15-0	byo-15-14	OK	0.503786	0.443398	-0.184209	0.186617	0.851961	0.972491	no
Glyma01g04476	Glyma01g04476	Glyma01g04476	Gm01:4012612-4020206	byo-15-0	byo-15-14	OK	8.15905	7.31731	-0.157088	0.277305	0.781546	0.957132	no
Glyma01g04484	Glyma01g04484	Glyma01g04484	Gm01:4023641-4024312	byo-15-0	byo-15-14	OK	6.95007	5.67954	-0.291254	0.372631	0.709423	0.93712	no
Glyma01g04492	Glyma01g04492	Glyma01g04492	Gm01:4024327-4035566	byo-15-0	byo-15-14	OK	6.30288	3.66637	-0.781659	1.38441	0.166232	0.535621	no
Glyma01g04500	Glyma01g04500	Glyma01g04500	Gm01:4070066-4074636	byo-15-0	byo-15-14	NOTEST	0.328888	0.383801	0.222761	-0.262162	0.793196	1	no
Glyma01g04515	Glyma01g04515	Glyma01g04515	Gm01:4094045-4096371	byo-15-0	byo-15-14	OK	3.58521	2.19122	-0.71032	1.16247	0.245046	0.644144	no
Glyma01g04530	Glyma01g04530	Glyma01g04530	Gm01:4108620-4111438	byo-15-0	byo-15-14	OK	71.2473	10.926	-2.70506	4.35867	1.30853e-05	0.000740921	yes
Glyma01g04545	Glyma01g04545	Glyma01g04545	Gm01:4119639-4119995	byo-15-0	byo-15-14	NOTEST	0	0	0	0	1	1	no
Glyma01g04560	Glyma01g04560	Glyma01g04560	Gm01:4134768-4138744	byo-15-0	byo-15-14	OK	3.00439	2.53404	-0.245633	0.339242	0.734427	0.943774	no
Glyma01g04570	Glyma01g04570	Glyma01g04570	Gm01:4140494-4144862	byo-15-0	byo-15-14	OK	10.5502	7.40224	-0.511231	0.843542	0.398925	0.787882	no
Glyma01g04580	Glyma01g04580	Glyma01g04580	Gm01:4160568-4163236	byo-15-0	byo-15-14	OK	1.12263	0.698961	-0.683604	0.827664	0.407861	0.794446	no
Glyma01g04590	Glyma01g04590	Glyma01g04590	Gm01:4190455-4199176	byo-15-0	byo-15-14	OK	0.77219	1.0102	0.387618	-0.589453	0.555557	0.882366	no
Glyma01g04600	Glyma01g04600	Glyma01g04600	Gm01:4213202-4215294	byo-15-0	byo-15-14	OK	9.3984	5.17937	-0.859639	1.35946	0.174002	0.54902	no
Glyma01g04610	Glyma01g04610	Glyma01g04610	Gm01:4217440-4221353	byo-15-0	byo-15-14	OK	1.76261	2.26523	0.36194	-0.520041	0.603035	0.902547	no
Glyma01g04616	Glyma01g04616	Glyma01g04616	Gm01:4234777-4236309	byo-15-0	byo-15-14	NOTEST	0	0	0	0	1	1	no
Glyma01g04623	Glyma01g04623	Glyma01g04623	Gm01:4248628-4253094	byo-15-0	byo-15-14	NOTEST	0	0	0	0	1	1	no
Glyma01g04630	Glyma01g04630	Glyma01g04630	Gm01:4267486-4273671	byo-15-0	byo-15-14	OK	1.02219	1.3076	0.355256	-0.512241	0.608482	0.904471	no
Glyma01g04640	Glyma01g04640	Glyma01g04640	Gm01:4278592-4280521	byo-15-0	byo-15-14	NOTEST	0	0.428561	1.79769e+308	1.79769e+308	0.011299	1	no
Glyma01g04650	Glyma01g04650	Glyma01g04650	Gm01:4282743-4288290	byo-15-0	byo-15-14	NOTEST	0	0	0	0	1	1	no
Glyma01g04660	Glyma01g04660	Glyma01g04660	Gm01:4294494-4299400	byo-15-0	byo-15-14	OK	1.20095	0.974663	-0.301207	0.402156	0.68757	0.93036	no
Glyma01g04670	Glyma01g04670	Glyma01g04670	Gm01:4302121-4303918	byo-15-0	byo-15-14	OK	0.753447	0.595957	-0.338298	0.37762	0.705713	0.935816	no
Glyma01g04690	Glyma01g04690	Glyma01g04690	Gm01:4314360-4316230	byo-15-0	byo-15-14	OK	8.05887	3.1071	-1.37501	2.1489	0.0316426	0.207206	no
Glyma01g04700	Glyma01g04700	Glyma01g04700	Gm01:4319542-4321677	byo-15-0	byo-15-14	NOTEST	0	0	0	0	1	1	no
Glyma01g04710	Glyma01g04710	Glyma01g04710	Gm01:4323773-4325439	byo-15-0	byo-15-14	OK	378.881	66.2087	-2.51665	3.57745	0.000346956	0.00930993	yes
Glyma01g04720	Glyma01g04720	Glyma01g04720	Gm01:4331150-4337114	byo-15-0	byo-15-14	OK	3.16695	6.1814	0.964841	-1.61346	0.106645	0.427582	no
Glyma01g04730	Glyma01g04730	Glyma01g04730	Gm01:4347876-4356892	byo-15-0	byo-15-14	OK	2.45459	1.56189	-0.652188	1.01287	0.311121	0.715965	no
Glyma01g04740	Glyma01g04740	Glyma01g04740	Gm01:4358996-4361499	byo-15-0	byo-15-14	OK	4.14509	3.73401	-0.150677	0.240071	0.810275	0.96354	no
Glyma01g04750	Glyma01g04750	Glyma01g04750	Gm01:4367348-4370072	byo-15-0	byo-15-14	OK	0.281912	0.830907	1.55944	-1.68259	0.092455	0.396141	no
Glyma01g04760	Glyma01g04760	Glyma01g04760	Gm01:4370091-4371490	byo-15-0	byo-15-14	OK	44.2664	19.6708	-1.17016	2.06073	0.039329	0.238195	no
Glyma01g04770	Glyma01g04770	Glyma01g04770	Gm01:4372756-4380517	byo-15-0	byo-15-14	NOTEST	0	0	0	0	1	1	no
Glyma01g04780	Glyma01g04780	Glyma01g04780	Gm01:4372756-4380517	byo-15-0	byo-15-14	NOTEST	0.00245786	0.0856117	5.12233	-0.0777486	0.938028	1	no
Glyma01g04791	Glyma01g04791	Glyma01g04791	Gm01:4372756-4380517	byo-15-0	byo-15-14	NOTEST	0.292756	0.10393	-1.49408	1.55713	0.119439	1	no
Glyma01g04800	Glyma01g04800	Glyma01g04800	Gm01:4381634-4382677	byo-15-0	byo-15-14	NOTEST	0	0.0587365	1.79769e+308	1.79769e+308	0.210186	1	no
Glyma01g04810	Glyma01g04810	Glyma01g04810	Gm01:4398540-4400009	byo-15-0	byo-15-14	NOTEST	0	0.0524217	1.79769e+308	1.79769e+308	0.210186	1	no
Glyma01g04820	Glyma01g04820	Glyma01g04820	Gm01:4406613-4412858	byo-15-0	byo-15-14	OK	13.595	8.3704	-0.69971	1.23127	0.218222	0.610659	no
Glyma01g04830	Glyma01g04830	Glyma01g04830	Gm01:4435158-4439690	byo-15-0	byo-15-14	OK	19.6307	8.08799	-1.27926	2.24597	0.0247058	0.177934	no
Glyma01g04860	Glyma01g04860	Glyma01g04860	Gm01:4462980-4471168	byo-15-0	byo-15-14	OK	3.82438	3.74508	-0.0302317	0.0471043	0.96243	0.994028	no
Glyma01g04870	Glyma01g04870	Glyma01g04870	Gm01:4462980-4471168	byo-15-0	byo-15-14	NOTEST	0.0930286	0.0620755	-0.58365	0.1256	0.900049	1	no
Glyma01g04880	Glyma01g04880	Glyma01g04880	Gm01:4472509-4474524	byo-15-0	byo-15-14	OK	6.63942	7.19407	0.115753	-0.189759	0.849498	0.971895	no
Glyma01g04890	Glyma01g04890	Glyma01g04890	Gm01:4508033-4510800	byo-15-0	byo-15-14	OK	7.69834	10.6417	0.467114	-0.78221	0.434091	0.814473	no
Glyma01g04895	Glyma01g04895	Glyma01g04895	Gm01:4537147-4539699	byo-15-0	byo-15-14	NOTEST	0	0	0	0	1	1	no
Glyma01g04900	Glyma01g04900	Glyma01g04900	Gm01:4581543-4588129	byo-15-0	byo-15-14	OK	4.48366	1.5774	-1.50713	2.13839	0.0324853	0.210764	no
Glyma01g04920	Glyma01g04920	Glyma01g04920	Gm01:4591469-4596424	byo-15-0	byo-15-14	OK	36.4142	8.6496	-2.0738	3.3348	0.000853611	0.0178366	yes
Glyma01g04930	Glyma01g04930	Glyma01g04930	Gm01:4617117-4621351	byo-15-0	byo-15-14	OK	6.56384	6.97902	0.0884837	-0.142389	0.886773	0.980501	no
Glyma01g04940	Glyma01g04940	Glyma01g04940	Gm01:4623827-4626604	byo-15-0	byo-15-14	NOTEST	0	0	0	0	1	1	no
Glyma01g04950	Glyma01g04950	Glyma01g04950	Gm01:4628266-4630966	byo-15-0	byo-15-14	NOTEST	0	0	0	0	1	1	no
Glyma01g04970	Glyma01g04970	Glyma01g04970	Gm01:4642856-4646062	byo-15-0	byo-15-14	NOTEST	0	0	0	0	1	1	no
Glyma01g04980	Glyma01g04980	Glyma01g04980	Gm01:4649145-4655506	byo-15-0	byo-15-14	OK	28.8264	15.4075	-0.903758	1.5165	0.129392	0.470291	no
Glyma01g04991	Glyma01g04991	Glyma01g04991	Gm01:4658655-4660266	byo-15-0	byo-15-14	OK	1.78466	1.41887	-0.330909	0.46192	0.644139	0.918614	no
Glyma01g05000	Glyma01g05000	Glyma01g05000	Gm01:4661267-4665903	byo-15-0	byo-15-14	OK	26.596	9.35513	-1.50738	2.62357	0.00870136	0.0915092	no
Glyma01g05020	Glyma01g05020	Glyma01g05020	Gm01:4671907-4672948	byo-15-0	byo-15-14	NOTEST	0	0.185642	1.79769e+308	1.79769e+308	0.0423572	1	no
Glyma01g05035	Glyma01g05035	Glyma01g05035	Gm01:4674370-4675308	byo-15-0	byo-15-14	NOTEST	0	0	0	0	1	1	no
Glyma01g05050	Glyma01g05050	Glyma01g05050	Gm01:4685833-4692108	byo-15-0	byo-15-14	NOTEST	0	0	0	0	1	1	no
Glyma01g05060	Glyma01g05060	Glyma01g05060	Gm01:4706315-4710196	byo-15-0	byo-15-14	NOTEST	0	0	0	0	1	1	no
Glyma01g05070	Glyma01g05070	Glyma01g05070	Gm01:4710246-4716428	byo-15-0	byo-15-14	NOTEST	0	0	0	0	1	1	no
Glyma01g05080	Glyma01g05080	Glyma01g05080	Gm01:4729092-4732808	byo-15-0	byo-15-14	OK	4.30409	1.49177	-1.52869	2.06967	0.038483	0.23499	no
Glyma01g05090	Glyma01g05090	Glyma01g05090	Gm01:4733168-4736974	byo-15-0	byo-15-14	NOTEST	0	0.0669587	1.79769e+308	1.79769e+308	0.0726662	1	no
Glyma01g05100	Glyma01g05100	Glyma01g05100	Gm01:4750064-4755456	byo-15-0	byo-15-14	OK	1.49908	2.95969	0.98137	-1.52818	0.126468	0.465434	no
Glyma01g05110	Glyma01g05110	Glyma01g05110	Gm01:4767629-4768506	byo-15-0	byo-15-14	NOTEST	0	0	0	0	1	1	no
Glyma01g05120	Glyma01g05120	Glyma01g05120	Gm01:4767629-4768506	byo-15-0	byo-15-14	NOTEST	0	0	0	0	1	1	no
Glyma01g05135	Glyma01g05135	Glyma01g05135	Gm01:4772497-4774260	byo-15-0	byo-15-14	NOTEST	0	0	0	0	1	1	no
Glyma01g05150	Glyma01g05150	Glyma01g05150	Gm01:4805906-4807682	byo-15-0	byo-15-14	OK	141.246	84.2978	-0.744643	1.13061	0.258221	0.659445	no
Glyma01g05160	Glyma01g05160	Glyma01g05160	Gm01:4822853-4826845	byo-15-0	byo-15-14	OK	8.44992	7.58961	-0.154912	0.265034	0.790984	0.959544	no
Glyma01g05170	Glyma01g05170	Glyma01g05170	Gm01:4850795-4854700	byo-15-0	byo-15-14	OK	8.80456	4.61628	-0.931519	1.55962	0.11885	0.450844	no
Glyma01g05180	Glyma01g05180	Glyma01g05180	Gm01:4855329-4863296	byo-15-0	byo-15-14	NOTEST	0.025728	0.0503639	0.969051	-0.254818	0.798864	1	no
Glyma01g05190	Glyma01g05190	Glyma01g05190	Gm01:4855329-4863296	byo-15-0	byo-15-14	NOTEST	0.215247	0.214512	-0.00493466	0.00497231	0.996033	1	no
Glyma01g05220	Glyma01g05220	Glyma01g05220	Gm01:4891977-4893336	byo-15-0	byo-15-14	OK	74.508	14.5117	-2.36018	3.95503	7.65263e-05	0.00294363	yes
Glyma01g05230	Glyma01g05230	Glyma01g05230	Gm01:4900381-4902743	byo-15-0	byo-15-14	OK	2.76485	6.99934	1.34002	-2.18435	0.0289368	0.196644	no
Glyma01g05240	Glyma01g05240	Glyma01g05240	Gm01:4928138-4929616	byo-15-0	byo-15-14	NOTEST	0	0.136681	1.79769e+308	1.79769e+308	0.127239	1	no
Glyma01g05310	Glyma01g05310	Glyma01g05310	Gm01:4961751-4963489	byo-15-0	byo-15-14	NOTEST	0	0.11288	1.79769e+308	1.79769e+308	0.0814107	1	no
Glyma01g05321	Glyma01g05321	Glyma01g05321	Gm01:5005094-5010084	byo-15-0	byo-15-14	OK	0.20101	0.849152	2.07875	-1.50305	0.132826	0.476831	no
Glyma01g05330	Glyma01g05330	Glyma01g05330	Gm01:5020413-5021405	byo-15-0	byo-15-14	NOTEST	0	0	0	0	1	1	no
Glyma01g05340	Glyma01g05340	Glyma01g05340	Gm01:5037886-5042760	byo-15-0	byo-15-14	OK	5.30928	5.38087	0.0193222	-0.0336517	0.973155	0.995815	no
Glyma01g05350	Glyma01g05350	Glyma01g05350	Gm01:5083980-5085647	byo-15-0	byo-15-14	OK	5.55056	4.58182	-0.276713	0.446307	0.655375	0.922143	no
Glyma01g05360	Glyma01g05360	Glyma01g05360	Gm01:5110798-5114049	byo-15-0	byo-15-14	OK	1.68105	2.25563	0.424169	-0.608845	0.542627	0.875462	no
Glyma01g05370	Glyma01g05370	Glyma01g05370	Gm01:5118887-5122289	byo-15-0	byo-15-14	OK	0.406201	1.0391	1.35507	-1.4104	0.158421	0.523086	no
Glyma01g05390	Glyma01g05390	Glyma01g05390	Gm01:5164083-5165652	byo-15-0	byo-15-14	NOTEST	0	0	0	0	1	1	no
Glyma01g05410	Glyma01g05410	Glyma01g05410	Gm01:5213600-5216013	byo-15-0	byo-15-14	OK	11.0284	7.61732	-0.533866	0.946513	0.343887	0.745753	no
Glyma01g05430	Glyma01g05430	Glyma01g05430	Gm01:5252557-5258022	byo-15-0	byo-15-14	OK	4.60795	4.82567	0.0666034	-0.107745	0.914198	0.98534	no
Glyma01g05435	Glyma01g05435	Glyma01g05435	Gm01:5252557-5258022	byo-15-0	byo-15-14	NOTEST	0	0	0	0	1	1	no
Glyma01g05440	Glyma01g05440	Glyma01g05440	Gm01:5263624-5268235	byo-15-0	byo-15-14	OK	1.89281	1.76532	-0.100594	0.147972	0.882365	0.978659	no
Glyma01g05450	Glyma01g05450	Glyma01g05450	Gm01:5286387-5287671	byo-15-0	byo-15-14	OK	0.603002	0.543098	-0.150951	0.157244	0.875053	0.977317	no
Glyma01g05470	Glyma01g05470	Glyma01g05470	Gm01:5303846-5307805	byo-15-0	byo-15-14	OK	3.31091	2.87425	-0.204047	0.28966	0.772076	0.954391	no
Glyma01g05490	Glyma01g05490	Glyma01g05490	Gm01:5313627-5317389	byo-15-0	byo-15-14	OK	10.1725	6.42756	-0.662325	1.02617	0.304813	0.709013	no
Glyma01g05500	Glyma01g05500	Glyma01g05500	Gm01:5324074-5325556	byo-15-0	byo-15-14	OK	1.85418	0.0917203	-4.33739	4.21579	2.48901e-05	0.00123452	yes
Glyma01g05521	Glyma01g05521	Glyma01g05521	Gm01:5332060-5334718	byo-15-0	byo-15-14	NOTEST	0	0	0	0	1	1	no
Glyma01g05540	Glyma01g05540	Glyma01g05540	Gm01:5339676-5347885	byo-15-0	byo-15-14	OK	0.287642	0.475635	0.72558	-0.733095	0.4635	0.831962	no
Glyma01g05550	Glyma01g05550	Glyma01g05550	Gm01:5348570-5352305	byo-15-0	byo-15-14	OK	11.5781	7.56352	-0.614267	1.07532	0.282231	0.685122	no
Glyma01g05565	Glyma01g05565	Glyma01g05565	Gm01:5365957-5368432	byo-15-0	byo-15-14	NOTEST	0.33885	0.343559	0.0199077	-0.0220835	0.982381	1	no
Glyma01g05580	Glyma01g05580	Glyma01g05580	Gm01:5372439-5377697	byo-15-0	byo-15-14	OK	3.34871	1.59743	-1.06785	1.68297	0.0923816	0.395931	no
Glyma01g05680	Glyma01g05680	Glyma01g05680	Gm01:5434961-5437325	byo-15-0	byo-15-14	NOTEST	0	0	0	0	1	1	no
Glyma01g05710	Glyma01g05710	Glyma01g05710	Gm01:5452126-5455897	byo-15-0	byo-15-14	OK	2.94789	2.55462	-0.206572	0.343255	0.731407	0.942879	no
Glyma01g05740	Glyma01g05740	Glyma01g05740	Gm01:5471207-5473302	byo-15-0	byo-15-14	OK	42.0294	74.3909	0.823728	-1.3888	0.164893	0.533576	no
Glyma01g05750	Glyma01g05750	Glyma01g05750	Gm01:5490127-5498444	byo-15-0	byo-15-14	OK	8.01252	5.88332	-0.445624	0.768696	0.442074	0.818824	no
Glyma01g05760	Glyma01g05760	Glyma01g05760	Gm01:5490127-5498444	byo-15-0	byo-15-14	OK	3.22941	1.35428	-1.25375	0.500525	0.616705	0.907895	no
Glyma01g05765	Glyma01g05765	Glyma01g05765	Gm01:5500755-5503968	byo-15-0	byo-15-14	OK	1.02493	0.346306	-1.56541	1.57298	0.115725	0.445111	no
Glyma01g05770	Glyma01g05770	Glyma01g05770	Gm01:5507145-5510888	byo-15-0	byo-15-14	OK	1.0381	0.737111	-0.493989	0.546489	0.58473	0.893903	no
Glyma01g05775	Glyma01g05775	Glyma01g05775	Gm01:5515370-5518889	byo-15-0	byo-15-14	NOTEST	0	0	0	0	1	1	no
Glyma01g05780	Glyma01g05780	Glyma01g05780	Gm01:5532190-5532902	byo-15-0	byo-15-14	OK	0	0.721006	1.79769e+308	1.79769e+308	0.0313809	0.206285	no
Glyma01g05800	Glyma01g05800	Glyma01g05800	Gm01:5536188-5540803	byo-15-0	byo-15-14	OK	11.1417	18.5956	0.738986	-1.30789	0.19091	0.573632	no
Glyma01g05805	Glyma01g05805	Glyma01g05805	Gm01:5546122-5546986	byo-15-0	byo-15-14	NOTEST	0	0.0423945	1.79769e+308	1.79769e+308	0.210186	1	no
Glyma01g05810	Glyma01g05810	Glyma01g05810	Gm01:5571757-5573352	byo-15-0	byo-15-14	OK	10.4102	2.80679	-1.89101	3.02788	0.00246276	0.0384589	yes
Glyma01g05820	Glyma01g05820	Glyma01g05820	Gm01:5576197-5588666	byo-15-0	byo-15-14	OK	4.28681	1.94557	-1.13971	1.27291	0.203052	0.591077	no
Glyma01g05830	Glyma01g05830	Glyma01g05830	Gm01:5591933-5594156	byo-15-0	byo-15-14	OK	0.682549	1.85039	1.43882	-1.96204	0.049758	0.274355	no
Glyma01g05840	Glyma01g05840	Glyma01g05840	Gm01:5603554-5605881	byo-15-0	byo-15-14	NOTEST	0	0	0	0	1	1	no
Glyma01g05850	Glyma01g05850	Glyma01g05850	Gm01:5614232-5617834	byo-15-0	byo-15-14	NOTEST	0	0.180964	1.79769e+308	1.79769e+308	0.0395942	1	no
Glyma01g05860	Glyma01g05860	Glyma01g05860	Gm01:5646198-5652308	byo-15-0	byo-15-14	OK	2.17516	1.88199	-0.208864	0.297874	0.765799	0.952565	no
Glyma01g05871	Glyma01g05871	Glyma01g05871	Gm01:5655285-5657085	byo-15-0	byo-15-14	OK	0.0983205	2.05828	4.3878	-3.40522	0.000661113	0.0147874	yes
Glyma01g05880	Glyma01g05880	Glyma01g05880	Gm01:5667408-5668624	byo-15-0	byo-15-14	OK	1.72163	1.76188	0.033342	-0.0442098	0.964737	0.994258	no
Glyma01g05890	Glyma01g05890	Glyma01g05890	Gm01:5668699-5671152	byo-15-0	byo-15-14	NOTEST	0.278496	0.206577	-0.430981	0.440438	0.65962	1	no
Glyma01g05920	Glyma01g05920	Glyma01g05920	Gm01:5704147-5706648	byo-15-0	byo-15-14	OK	1.43337	2.12724	0.569567	-0.836984	0.402602	0.790526	no
Glyma01g05933	Glyma01g05933	Glyma01g05933	Gm01:5723315-5724248	byo-15-0	byo-15-14	NOTEST	0	0	0	0	1	1	no
Glyma01g05946	Glyma01g05946	Glyma01g05946	Gm01:5726524-5728292	byo-15-0	byo-15-14	NOTEST	0	0	0	0	1	1	no
Glyma01g05960	Glyma01g05960	Glyma01g05960	Gm01:5750258-5754433	byo-15-0	byo-15-14	OK	1.41936	0.462781	-1.61684	2.08345	0.0372105	0.229951	no
Glyma01g05970	Glyma01g05970	Glyma01g05970	Gm01:5789076-5789854	byo-15-0	byo-15-14	NOTEST	0	0	0	0	1	1	no
Glyma01g05980	Glyma01g05980	Glyma01g05980	Gm01:5800710-5803197	byo-15-0	byo-15-14	NOTEST	0	0.0337054	1.79769e+308	1.79769e+308	0.127239	1	no
Glyma01g05991	Glyma01g05991	Glyma01g05991	Gm01:5815181-5815856	byo-15-0	byo-15-14	OK	1.13695	0.965643	-0.235613	0.252754	0.800458	0.96176	no
Glyma01g06001	Glyma01g06001	Glyma01g06001	Gm01:5820213-5821125	byo-15-0	byo-15-14	NOTEST	0	0	0	0	1	1	no
Glyma01g06010	Glyma01g06010	Glyma01g06010	Gm01:5849676-5850474	byo-15-0	byo-15-14	OK	2.85955	3.3344	0.221638	-0.297038	0.766438	0.952565	no
Glyma01g06030	Glyma01g06030	Glyma01g06030	Gm01:5873668-5876124	byo-15-0	byo-15-14	OK	46.6578	177.779	1.9299	-2.68903	0.00716598	0.0806715	no
Glyma01g06060	Glyma01g06060	Glyma01g06060	Gm01:5950520-5957354	byo-15-0	byo-15-14	OK	2.5703	4.11588	0.679261	-0.954992	0.339582	0.741704	no
Glyma01g06080	Glyma01g06080	Glyma01g06080	Gm01:5980779-5983675	byo-15-0	byo-15-14	OK	7.87588	7.10272	-0.14907	0.246689	0.805149	0.962122	no
Glyma01g06091	Glyma01g06091	Glyma01g06091	Gm01:6001894-6002536	byo-15-0	byo-15-14	NOTEST	0	0	0	0	1	1	no
Glyma01g06101	Glyma01g06101	Glyma01g06101	Gm01:6012889-6016913	byo-15-0	byo-15-14	NOTEST	0	0	0	0	1	1	no
Glyma01g06110	Glyma01g06110	Glyma01g06110	Gm01:6012889-6016913	byo-15-0	byo-15-14	OK	212.383	84.2913	-1.33321	1.896	0.0579596	0.299814	no
Glyma01g06121	Glyma01g06121	Glyma01g06121	Gm01:6021842-6025894	byo-15-0	byo-15-14	NOTEST	0	0	0	0	1	1	no
Glyma01g06131	Glyma01g06131	Glyma01g06131	Gm01:6027072-6027783	byo-15-0	byo-15-14	NOTEST	0	0	0	0	1	1	no
Glyma01g06140	Glyma01g06140	Glyma01g06140	Gm01:6036836-6042396	byo-15-0	byo-15-14	NOTEST	0	0	0	0	1	1	no
Glyma01g06150	Glyma01g06150	Glyma01g06150	Gm01:6047154-6049059	byo-15-0	byo-15-14	OK	1.57089	0	-1.79769e+308	-1.79769e+308	0.00354714	0.0499179	yes
Glyma01g06170	Glyma01g06170	Glyma01g06170	Gm01:6071138-6081550	byo-15-0	byo-15-14	OK	9.62922	15.9982	0.732416	-1.19584	0.231758	0.627976	no
Glyma01g06181	Glyma01g06181	Glyma01g06181	Gm01:6100672-6102037	byo-15-0	byo-15-14	NOTEST	0	0	0	0	1	1	no
Glyma01g06192	Glyma01g06192	Glyma01g06192	Gm01:6238679-6240315	byo-15-0	byo-15-14	NOTEST	0	0.0251254	1.79769e+308	1.79769e+308	0.210186	1	no
Glyma01g06203	Glyma01g06203	Glyma01g06203	Gm01:6266528-6267750	byo-15-0	byo-15-14	NOTEST	0	0	0	0	1	1	no
Glyma01g06214	Glyma01g06214	Glyma01g06214	Gm01:6283658-6285214	byo-15-0	byo-15-14	NOTEST	0	0	0	0	1	1	no
Glyma01g06226	Glyma01g06226	Glyma01g06226	Gm01:6285502-6288118	byo-15-0	byo-15-14	NOTEST	0	0	0	0	1	1	no
Glyma01g06238	Glyma01g06238	Glyma01g06238	Gm01:6291503-6292208	byo-15-0	byo-15-14	NOTEST	0	0	0	0	1	1	no
Glyma01g06250	Glyma01g06250	Glyma01g06250	Gm01:6303783-6304910	byo-15-0	byo-15-14	NOTEST	0	0	0	0	1	1	no
Glyma01g06255	Glyma01g06255	Glyma01g06255	Gm01:6305430-6306253	byo-15-0	byo-15-14	NOTEST	0	0	0	0	1	1	no
Glyma01g06260	Glyma01g06260	Glyma01g06260	Gm01:6314251-6321822	byo-15-0	byo-15-14	OK	10.4645	7.34946	-0.509793	0.866726	0.386092	0.779549	no
Glyma01g06265	Glyma01g06265	Glyma01g06265	Gm01:6323487-6330290	byo-15-0	byo-15-14	OK	2.1978	0.0722358	-4.9272	6.03859	1.55471e-09	3.54606e-07	yes
Glyma01g06270	Glyma01g06270	Glyma01g06270	Gm01:6353278-6357024	byo-15-0	byo-15-14	OK	5.5519	5.04658	-0.137677	0.224177	0.82262	0.965514	no
Glyma01g06281	Glyma01g06281	Glyma01g06281	Gm01:6358175-6364839	byo-15-0	byo-15-14	OK	1.20528	1.51047	0.325624	-0.466836	0.640617	0.917458	no
Glyma01g06290	Glyma01g06290	Glyma01g06290	Gm01:6415709-6426123	byo-15-0	byo-15-14	OK	5.29396	2.67925	-0.982517	1.62005	0.105222	0.424293	no
Glyma01g06300	Glyma01g06300	Glyma01g06300	Gm01:6427320-6430789	byo-15-0	byo-15-14	OK	4.74675	4.12309	-0.203215	0.330485	0.741033	0.94559	no
Glyma01g06320	Glyma01g06320	Glyma01g06320	Gm01:6438347-6443201	byo-15-0	byo-15-14	OK	5.341	3.96412	-0.430109	0.671537	0.501879	0.852443	no
Glyma01g06330	Glyma01g06330	Glyma01g06330	Gm01:6463489-6464681	byo-15-0	byo-15-14	NOTEST	0	0	0	0	1	1	no
Glyma01g06350	Glyma01g06350	Glyma01g06350	Gm01:6519357-6525574	byo-15-0	byo-15-14	NOTEST	0	0.0528153	1.79769e+308	1.79769e+308	0.210186	1	no
Glyma01g06370	Glyma01g06370	Glyma01g06370	Gm01:6606759-6612290	byo-15-0	byo-15-14	OK	0.741949	0.278562	-1.41332	1.82317	0.0682784	0.331764	no
Glyma01g06380	Glyma01g06380	Glyma01g06380	Gm01:6619142-6624870	byo-15-0	byo-15-14	OK	3.47011	5.18385	0.579041	-0.860757	0.389372	0.781651	no
Glyma01g06403	Glyma01g06403	Glyma01g06403	Gm01:6653831-6654651	byo-15-0	byo-15-14	NOTEST	0	0	0	0	1	1	no
Glyma01g06426	Glyma01g06426	Glyma01g06426	Gm01:6655568-6658132	byo-15-0	byo-15-14	NOTEST	0	0	0	0	1	1	no
Glyma01g06450	Glyma01g06450	Glyma01g06450	Gm01:6697229-6704493	byo-15-0	byo-15-14	OK	2.97056	4.26175	0.520711	-0.895498	0.370521	0.767307	no
Glyma01g06465	Glyma01g06465	Glyma01g06465	Gm01:6734268-6734951	byo-15-0	byo-15-14	NOTEST	0	0	0	0	1	1	no
Glyma01g06480	Glyma01g06480	Glyma01g06480	Gm01:6737090-6743586	byo-15-0	byo-15-14	NOTEST	0.204192	0.233234	0.191854	-0.157879	0.874552	1	no
Glyma01g06530	Glyma01g06530	Glyma01g06530	Gm01:6773745-6780125	byo-15-0	byo-15-14	NOTEST	0.0349009	0.0270555	-0.367341	0.178167	0.858592	1	no
Glyma01g06540	Glyma01g06540	Glyma01g06540	Gm01:6785070-6791180	byo-15-0	byo-15-14	OK	2.63379	3.29775	0.32434	-0.395017	0.69283	0.931405	no
Glyma01g06550	Glyma01g06550	Glyma01g06550	Gm01:6797682-6802949	byo-15-0	byo-15-14	OK	0.981461	2.44152	1.31477	-1.91092	0.0560153	0.293992	no
Glyma01g06575	Glyma01g06575	Glyma01g06575	Gm01:6821946-6822491	byo-15-0	byo-15-14	NOTEST	0	0	0	0	1	1	no
Glyma01g06600	Glyma01g06600	Glyma01g06600	Gm01:6945949-6947844	byo-15-0	byo-15-14	OK	9.66357	7.52167	-0.361503	0.54189	0.587894	0.894916	no
Glyma01g06610	Glyma01g06610	Glyma01g06610	Gm01:6949449-6956726	byo-15-0	byo-15-14	NOTEST	0	0.122291	1.79769e+308	1.79769e+308	0.0720223	1	no
Glyma01g06620	Glyma01g06620	Glyma01g06620	Gm01:6963802-6967415	byo-15-0	byo-15-14	OK	6.66952	5.24615	-0.346324	0.558969	0.576183	0.891059	no
Glyma01g06630	Glyma01g06630	Glyma01g06630	Gm01:6987088-6990503	byo-15-0	byo-15-14	OK	9.13473	8.98931	-0.0231509	0.0391051	0.968807	0.995445	no
Glyma01g06640	Glyma01g06640	Glyma01g06640	Gm01:6992005-6995011	byo-15-0	byo-15-14	OK	0.413323	2.29769	2.47484	-2.87739	0.00400976	0.0545588	no
Glyma01g06660	Glyma01g06660	Glyma01g06660	Gm01:7007301-7012903	byo-15-0	byo-15-14	NOTEST	0	0.0233428	1.79769e+308	1.79769e+308	0.25808	1	no
Glyma01g06671	Glyma01g06671	Glyma01g06671	Gm01:7051709-7055503	byo-15-0	byo-15-14	NOTEST	0	0	0	0	1	1	no
Glyma01g06681	Glyma01g06681	Glyma01g06681	Gm01:7074917-7078717	byo-15-0	byo-15-14	OK	3.84817	3.31018	-0.217263	0.381575	0.702776	0.935069	no
Glyma01g06690	Glyma01g06690	Glyma01g06690	Gm01:7089055-7091542	byo-15-0	byo-15-14	OK	0.301817	1.46509	2.27924	-2.8327	0.00461566	0.060061	no
Glyma01g06700	Glyma01g06700	Glyma01g06700	Gm01:7093539-7097353	byo-15-0	byo-15-14	OK	0.985654	1.23111	0.320811	-0.368751	0.712314	0.937814	no
Glyma01g06720	Glyma01g06720	Glyma01g06720	Gm01:7128540-7130153	byo-15-0	byo-15-14	NOTEST	0	0	0	0	1	1	no
Glyma01g06730	Glyma01g06730	Glyma01g06730	Gm01:7131214-7140582	byo-15-0	byo-15-14	OK	2.20928	1.84842	-0.257279	0.400012	0.689148	0.930897	no
Glyma01g06740	Glyma01g06740	Glyma01g06740	Gm01:7146652-7148230	byo-15-0	byo-15-14	OK	74.8015	53.1664	-0.492552	0.720082	0.471475	0.834942	no
Glyma01g06750	Glyma01g06750	Glyma01g06750	Gm01:7149379-7152784	byo-15-0	byo-15-14	OK	4.97567	4.48409	-0.150075	0.231879	0.816632	0.964556	no
Glyma01g06762	Glyma01g06762	Glyma01g06762	Gm01:7159103-7161168	byo-15-0	byo-15-14	NOTEST	0	0	0	0	1	1	no
Glyma01g06774	Glyma01g06774	Glyma01g06774	Gm01:7193728-7195967	byo-15-0	byo-15-14	NOTEST	0	0	0	0	1	1	no
Glyma01g06787	Glyma01g06787	Glyma01g06787	Gm01:7202426-7203771	byo-15-0	byo-15-14	OK	2.69438	2.35552	-0.193907	0.229072	0.818813	0.965045	no
Glyma01g06800	Glyma01g06800	Glyma01g06800	Gm01:7209667-7216248	byo-15-0	byo-15-14	OK	7.28861	5.0407	-0.53202	0.832458	0.40515	0.792631	no
Glyma01g06810	Glyma01g06810	Glyma01g06810	Gm01:7209667-7216248	byo-15-0	byo-15-14	OK	0.1929	0.631232	1.71032	-0.453284	0.650344	0.920347	no
Glyma01g06820	Glyma01g06820	Glyma01g06820	Gm01:7217423-7219310	byo-15-0	byo-15-14	OK	1.95723	0.825576	-1.24534	1.45541	0.145555	0.499546	no
Glyma01g06830	Glyma01g06830	Glyma01g06830	Gm01:7247591-7249157	byo-15-0	byo-15-14	NOTEST	0	0	0	0	1	1	no
Glyma01g06840	Glyma01g06840	Glyma01g06840	Gm01:7250230-7254936	byo-15-0	byo-15-14	OK	19.7419	10.1937	-0.95358	1.6841	0.0921632	0.395205	no
Glyma01g06850	Glyma01g06850	Glyma01g06850	Gm01:7272747-7275098	byo-15-0	byo-15-14	OK	2.63092	1.31776	-0.997483	1.39392	0.163342	0.53089	no
Glyma01g06860	Glyma01g06860	Glyma01g06860	Gm01:7277818-7281645	byo-15-0	byo-15-14	NOTEST	0	0	0	0	1	1	no
Glyma01g06870	Glyma01g06870	Glyma01g06870	Gm01:7343212-7351310	byo-15-0	byo-15-14	OK	1.39634	1.1851	-0.236637	0.288087	0.77328	0.954547	no
Glyma01g06880	Glyma01g06880	Glyma01g06880	Gm01:7358248-7360930	byo-15-0	byo-15-14	NOTEST	0.148337	0.13075	-0.182063	0.177757	0.858914	1	no
Glyma01g06902	Glyma01g06902	Glyma01g06902	Gm01:7382653-7384804	byo-15-0	byo-15-14	NOTEST	0	0	0	0	1	1	no
Glyma01g06924	Glyma01g06924	Glyma01g06924	Gm01:7422342-7427765	byo-15-0	byo-15-14	NOTEST	0	0	0	0	1	1	no
Glyma01g06947	Glyma01g06947	Glyma01g06947	Gm01:7435646-7436810	byo-15-0	byo-15-14	NOTEST	0	0	0	0	1	1	no
Glyma01g06970	Glyma01g06970	Glyma01g06970	Gm01:7479447-7482232	byo-15-0	byo-15-14	OK	12.5749	16.9043	0.426841	-0.747685	0.45465	0.82719	no
Glyma01g06980	Glyma01g06980	Glyma01g06980	Gm01:7497548-7505696	byo-15-0	byo-15-14	NOTEST	0	0	0	0	1	1	no
Glyma01g06995	Glyma01g06995	Glyma01g06995	Gm01:7509309-7511663	byo-15-0	byo-15-14	NOTEST	0	0	0	0	1	1	no
Glyma01g07010	Glyma01g07010	Glyma01g07010	Gm01:7546180-7550537	byo-15-0	byo-15-14	OK	15.9026	7.22108	-1.13898	1.92284	0.0545	0.288658	no
Glyma01g07020	Glyma01g07020	Glyma01g07020	Gm01:7562682-7571075	byo-15-0	byo-15-14	OK	1.0279	1.48441	0.530183	-0.507902	0.611522	0.905458	no
Glyma01g07040	Glyma01g07040	Glyma01g07040	Gm01:7573115-7574981	byo-15-0	byo-15-14	OK	0.95946	1.60118	0.738838	-1.01975	0.307849	0.712364	no
Glyma01g07046	Glyma01g07046	Glyma01g07046	Gm01:7576240-7581159	byo-15-0	byo-15-14	NOTEST	0.347186	0.0641325	-2.43658	1.65534	0.0978558	1	no
Glyma01g07053	Glyma01g07053	Glyma01g07053	Gm01:7587960-7591978	byo-15-0	byo-15-14	NOTEST	0	0	0	0	1	1	no
Glyma01g07060	Glyma01g07060	Glyma01g07060	Gm01:7606030-7608993	byo-15-0	byo-15-14	NOTEST	0	0	0	0	1	1	no
Glyma01g07070	Glyma01g07070	Glyma01g07070	Gm01:7614281-7618124	byo-15-0	byo-15-14	OK	5.44742	6.88845	0.338607	-0.572787	0.566789	0.887114	no
Glyma01g07080	Glyma01g07080	Glyma01g07080	Gm01:7621975-7627809	byo-15-0	byo-15-14	OK	0.680949	3.80308	2.48155	-0.837102	0.402535	0.790526	no
Glyma01g07091	Glyma01g07091	Glyma01g07091	Gm01:7621975-7627809	byo-15-0	byo-15-14	OK	2.54437	4.77381	0.90783	-1.43362	0.151681	0.510934	no
Glyma01g07100	Glyma01g07100	Glyma01g07100	Gm01:7645596-7648115	byo-15-0	byo-15-14	OK	33.8696	15.5838	-1.11995	1.96305	0.0496408	0.274035	no
Glyma01g07110	Glyma01g07110	Glyma01g07110	Gm01:7657795-7664672	byo-15-0	byo-15-14	NOTEST	0.161028	0.201725	0.325072	-0.296047	0.767195	1	no
Glyma01g07120	Glyma01g07120	Glyma01g07120	Gm01:7694027-7700472	byo-15-0	byo-15-14	OK	36.3349	17.5912	-1.0465	1.46079	0.144072	0.496512	no
Glyma01g07130	Glyma01g07130	Glyma01g07130	Gm01:7726769-7727260	byo-15-0	byo-15-14	OK	356.193	316.329	-0.171235	0.282921	0.777238	0.955486	no
Glyma01g07140	Glyma01g07140	Glyma01g07140	Gm01:7745867-7748795	byo-15-0	byo-15-14	OK	0.747157	1.14645	0.617694	-0.716892	0.473441	0.836039	no
Glyma01g07150	Glyma01g07150	Glyma01g07150	Gm01:7755456-7755710	byo-15-0	byo-15-14	NOTEST	0	0	0	0	1	1	no
Glyma01g07155	Glyma01g07155	Glyma01g07155	Gm01:7761366-7761600	byo-15-0	byo-15-14	NOTEST	0	0	0	0	1	1	no
Glyma01g07160	Glyma01g07160	Glyma01g07160	Gm01:7762334-7764158	byo-15-0	byo-15-14	OK	0.637746	1.09622	0.781489	-0.936327	0.349105	0.74954	no
Glyma01g07175	Glyma01g07175	Glyma01g07175	Gm01:7777226-7781079	byo-15-0	byo-15-14	OK	3.07607	3.25582	0.0819306	-0.127557	0.898499	0.982197	no
Glyma01g07190	Glyma01g07190	Glyma01g07190	Gm01:7781287-7786746	byo-15-0	byo-15-14	OK	1.99216	2.12836	0.0954082	-0.122355	0.902618	0.982951	no
Glyma01g07212	Glyma01g07212	Glyma01g07212	Gm01:7794008-7794422	byo-15-0	byo-15-14	NOTEST	0	0	0	0	1	1	no
Glyma01g07234	Glyma01g07234	Glyma01g07234	Gm01:7804303-7805165	byo-15-0	byo-15-14	OK	0.350217	0.569946	0.702577	-0.674071	0.500266	0.852232	no
Glyma01g07256	Glyma01g07256	Glyma01g07256	Gm01:7805183-7807029	byo-15-0	byo-15-14	NOTEST	0	0	0	0	1	1	no
Glyma01g07278	Glyma01g07278	Glyma01g07278	Gm01:7894471-7899056	byo-15-0	byo-15-14	NOTEST	0	0	0	0	1	1	no
Glyma01g07300	Glyma01g07300	Glyma01g07300	Gm01:7959018-7960497	byo-15-0	byo-15-14	OK	1.12864	0.798393	-0.499415	0.586374	0.557624	0.883429	no
Glyma01g07310	Glyma01g07310	Glyma01g07310	Gm01:7961184-7963298	byo-15-0	byo-15-14	OK	1.22672	1.78678	0.542557	-0.602646	0.546744	0.877432	no
Glyma01g07320	Glyma01g07320	Glyma01g07320	Gm01:7976530-7977692	byo-15-0	byo-15-14	NOTEST	0	0	0	0	1	1	no
Glyma01g07343	Glyma01g07343	Glyma01g07343	Gm01:8062113-8062653	byo-15-0	byo-15-14	NOTEST	0	0	0	0	1	1	no
Glyma01g07366	Glyma01g07366	Glyma01g07366	Gm01:8067733-8073984	byo-15-0	byo-15-14	NOTEST	0	0	0	0	1	1	no
Glyma01g07390	Glyma01g07390	Glyma01g07390	Gm01:8081945-8087022	byo-15-0	byo-15-14	OK	1.00644	0.156217	-2.68764	2.86696	0.00414435	0.0556689	no
Glyma01g07416	Glyma01g07416	Glyma01g07416	Gm01:8182612-8184549	byo-15-0	byo-15-14	NOTEST	0	0	0	0	1	1	no
Glyma01g07443	Glyma01g07443	Glyma01g07443	Gm01:8199812-8203907	byo-15-0	byo-15-14	NOTEST	0	0	0	0	1	1	no
Glyma01g07470	Glyma01g07470	Glyma01g07470	Gm01:8280629-8281870	byo-15-0	byo-15-14	NOTEST	0	0	0	0	1	1	no
Glyma01g07500	Glyma01g07500	Glyma01g07500	Gm01:8288472-8290635	byo-15-0	byo-15-14	NOTEST	0	0	0	0	1	1	no
Glyma01g07530	Glyma01g07530	Glyma01g07530	Gm01:8321044-8331324	byo-15-0	byo-15-14	OK	2.71795	3.85028	0.502441	-0.845492	0.397836	0.787095	no
Glyma01g07542	Glyma01g07542	Glyma01g07542	Gm01:8338977-8341376	byo-15-0	byo-15-14	NOTEST	0.232174	0.345951	0.575362	-0.529048	0.596772	1	no
Glyma01g07554	Glyma01g07554	Glyma01g07554	Gm01:8344184-8347552	byo-15-0	byo-15-14	OK	39.9778	20.3065	-0.977256	1.72537	0.0844601	0.374879	no
Glyma01g07567	Glyma01g07567	Glyma01g07567	Gm01:8348953-8350397	byo-15-0	byo-15-14	OK	0.779837	9.18834	3.55856	-4.76379	1.89988e-06	0.000152688	yes
Glyma01g07580	Glyma01g07580	Glyma01g07580	Gm01:8387061-8389448	byo-15-0	byo-15-14	OK	11.7828	4.30585	-1.45231	2.5251	0.0115667	0.110377	no
Glyma01g07601	Glyma01g07601	Glyma01g07601	Gm01:8400738-8401869	byo-15-0	byo-15-14	NOTEST	0	0.100944	1.79769e+308	1.79769e+308	0.127239	1	no
Glyma01g07621	Glyma01g07621	Glyma01g07621	Gm01:8410014-8411417	byo-15-0	byo-15-14	NOTEST	0	0	0	0	1	1	no
Glyma01g07641	Glyma01g07641	Glyma01g07641	Gm01:8426105-8455213	byo-15-0	byo-15-14	OK	3.72555	3.31685	-0.167641	0.288768	0.772759	0.954484	no
Glyma01g07661	Glyma01g07661	Glyma01g07661	Gm01:8426105-8455213	byo-15-0	byo-15-14	NOTEST	0.0774503	0.0540793	-0.518194	0.0904933	0.927895	1	no
Glyma01g07680	Glyma01g07680	Glyma01g07680	Gm01:8471437-8478753	byo-15-0	byo-15-14	OK	2.03986	2.97052	0.542246	-0.946842	0.34372	0.745753	no
Glyma01g07690	Glyma01g07690	Glyma01g07690	Gm01:8483094-8485802	byo-15-0	byo-15-14	OK	1.92388	0.524776	-1.87425	2.64576	0.00815067	0.0876441	no
Glyma01g07716	Glyma01g07716	Glyma01g07716	Gm01:8488370-8491061	byo-15-0	byo-15-14	NOTEST	0	0	0	0	1	1	no
Glyma01g07743	Glyma01g07743	Glyma01g07743	Gm01:8512443-8513748	byo-15-0	byo-15-14	NOTEST	0	0	0	0	1	1	no
Glyma01g07770	Glyma01g07770	Glyma01g07770	Gm01:8571080-8576705	byo-15-0	byo-15-14	OK	12.422	3.71989	-1.73956	2.83531	0.00457808	0.0596919	no
Glyma01g07780	Glyma01g07780	Glyma01g07780	Gm01:8580150-8584320	byo-15-0	byo-15-14	OK	3.0269	10.18	1.74982	-2.96956	0.00298223	0.0444085	yes
Glyma01g07791	Glyma01g07791	Glyma01g07791	Gm01:8585310-8588909	byo-15-0	byo-15-14	OK	0.662458	1.28526	0.956163	-1.12379	0.261102	0.662428	no
Glyma01g07800	Glyma01g07800	Glyma01g07800	Gm01:8594093-8595436	byo-15-0	byo-15-14	OK	7.12379	6.10939	-0.221616	0.364924	0.715168	0.938436	no
Glyma01g07860	Glyma01g07860	Glyma01g07860	Gm01:8667868-8673493	byo-15-0	byo-15-14	OK	0	3.59389	1.79769e+308	1.79769e+308	0.000290871	0.00827106	yes
Glyma01g07876	Glyma01g07876	Glyma01g07876	Gm01:8788410-8789743	byo-15-0	byo-15-14	NOTEST	0.0358108	0	-1.79769e+308	-1.79769e+308	0.237695	1	no
Glyma01g07893	Glyma01g07893	Glyma01g07893	Gm01:8792135-8793707	byo-15-0	byo-15-14	NOTEST	0	0	0	0	1	1	no
Glyma01g07910	Glyma01g07910	Glyma01g07910	Gm01:8838722-8843110	byo-15-0	byo-15-14	NOTEST	0	0	0	0	1	1	no
Glyma01g07930	Glyma01g07930	Glyma01g07930	Gm01:8874759-8878203	byo-15-0	byo-15-14	OK	15.1611	16.9673	0.162387	-0.2885	0.772964	0.954506	no
Glyma01g07940	Glyma01g07940	Glyma01g07940	Gm01:8910470-8913789	byo-15-0	byo-15-14	OK	2.33979	1.90252	-0.298467	0.448411	0.653857	0.921666	no
Glyma01g07970	Glyma01g07970	Glyma01g07970	Gm01:8936938-8942561	byo-15-0	byo-15-14	NOTEST	0	0	0	0	1	1	no
Glyma01g07985	Glyma01g07985	Glyma01g07985	Gm01:8949064-8950284	byo-15-0	byo-15-14	NOTEST	0.0791532	0.064211	-0.301826	0.12395	0.901355	1	no
Glyma01g08001	Glyma01g08001	Glyma01g08001	Gm01:8978273-8979785	byo-15-0	byo-15-14	NOTEST	0	0	0	0	1	1	no
Glyma01g08015	Glyma01g08015	Glyma01g08015	Gm01:8998365-8999926	byo-15-0	byo-15-14	NOTEST	0	0	0	0	1	1	no
Glyma01g08030	Glyma01g08030	Glyma01g08030	Gm01:9017676-9019966	byo-15-0	byo-15-14	NOTEST	0	0	0	0	1	1	no
Glyma01g08043	Glyma01g08043	Glyma01g08043	Gm01:9021976-9042121	byo-15-0	byo-15-14	OK	1.08097	1.10557	0.0324659	-0.0519399	0.958577	0.993887	no
Glyma01g08056	Glyma01g08056	Glyma01g08056	Gm01:9051046-9057050	byo-15-0	byo-15-14	OK	2.41778	1.08244	-1.1594	1.45617	0.145345	0.498909	no
Glyma01g08070	Glyma01g08070	Glyma01g08070	Gm01:9109611-9110650	byo-15-0	byo-15-14	NOTEST	0	0	0	0	1	1	no
Glyma01g08080	Glyma01g08080	Glyma01g08080	Gm01:9174134-9176210	byo-15-0	byo-15-14	OK	0.798115	0.334316	-1.25538	1.4728	0.140804	0.491049	no
Glyma01g08096	Glyma01g08096	Glyma01g08096	Gm01:9198539-9199466	byo-15-0	byo-15-14	NOTEST	0.161598	0.0617717	-1.38739	0.649166	0.516231	1	no
Glyma01g08113	Glyma01g08113	Glyma01g08113	Gm01:9252869-9254570	byo-15-0	byo-15-14	NOTEST	0	0	0	0	1	1	no
Glyma01g08130	Glyma01g08130	Glyma01g08130	Gm01:9331637-9344994	byo-15-0	byo-15-14	NOTEST	0	0.0242545	1.79769e+308	1.79769e+308	0.210186	1	no
Glyma01g08150	Glyma01g08150	Glyma01g08150	Gm01:9446809-9451393	byo-15-0	byo-15-14	NOTEST	0.328158	0.331904	0.0163769	-0.0166274	0.986734	1	no
Glyma01g08191	Glyma01g08191	Glyma01g08191	Gm01:9525972-9529696	byo-15-0	byo-15-14	NOTEST	0	0	0	0	1	1	no
Glyma01g08230	Glyma01g08230	Glyma01g08230	Gm01:9575252-9581967	byo-15-0	byo-15-14	OK	4.22633	4.7197	0.159291	-0.271533	0.785981	0.958339	no
Glyma01g08250	Glyma01g08250	Glyma01g08250	Gm01:9636460-9637409	byo-15-0	byo-15-14	NOTEST	0	0	0	0	1	1	no
Glyma01g08260	Glyma01g08260	Glyma01g08260	Gm01:9642089-9646537	byo-15-0	byo-15-14	OK	1.09706	1.62466	0.566494	-0.662535	0.507629	0.855984	no
Glyma01g08400	Glyma01g08400	Glyma01g08400	Gm01:9844796-9845510	byo-15-0	byo-15-14	NOTEST	0	0	0	0	1	1	no
Glyma01g08540	Glyma01g08540	Glyma01g08540	Gm01:9914169-9919593	byo-15-0	byo-15-14	OK	3.52647	2.85003	-0.307249	0.496311	0.619675	0.908955	no
Glyma01g08560	Glyma01g08560	Glyma01g08560	Gm01:9947412-9949603	byo-15-0	byo-15-14	NOTEST	0	0	0	0	1	1	no
Glyma01g08580	Glyma01g08580	Glyma01g08580	Gm01:9980287-9986041	byo-15-0	byo-15-14	OK	10.1764	9.72151	-0.0659777	0.116733	0.907071	0.983997	no
Glyma01g08586	Glyma01g08586	Glyma01g08586	Gm01:10000985-10002625	byo-15-0	byo-15-14	NOTEST	0	0	0	0	1	1	no
Glyma01g08593	Glyma01g08593	Glyma01g08593	Gm01:10003770-10020103	byo-15-0	byo-15-14	NOTEST	0	0	0	0	1	1	no
Glyma01g08600	Glyma01g08600	Glyma01g08600	Gm01:10022026-10027778	byo-15-0	byo-15-14	OK	9.12941	6.32833	-0.528696	0.899535	0.368368	0.765475	no
Glyma01g08610	Glyma01g08610	Glyma01g08610	Gm01:10032095-10036624	byo-15-0	byo-15-14	NOTEST	0	0	0	0	1	1	no
Glyma01g08621	Glyma01g08621	Glyma01g08621	Gm01:10051789-10059800	byo-15-0	byo-15-14	NOTEST	0	0	0	0	1	1	no
Glyma01g08631	Glyma01g08631	Glyma01g08631	Gm01:10051789-10059800	byo-15-0	byo-15-14	NOTEST	0	0	0	0	1	1	no
Glyma01g08640	Glyma01g08640	Glyma01g08640	Gm01:10086673-10091927	byo-15-0	byo-15-14	NOTEST	0.0211183	0.0472749	1.16258	-0.740024	0.459286	1	no
Glyma01g08650	Glyma01g08650	Glyma01g08650	Gm01:10086673-10091927	byo-15-0	byo-15-14	NOTEST	0	0	0	0	1	1	no
Glyma01g08690	Glyma01g08690	Glyma01g08690	Gm01:10142572-10144504	byo-15-0	byo-15-14	NOTEST	0	0	0	0	1	1	no
Glyma01g08730	Glyma01g08730	Glyma01g08730	Gm01:10288660-10290556	byo-15-0	byo-15-14	NOTEST	0	0	0	0	1	1	no
Glyma01g08745	Glyma01g08745	Glyma01g08745	Gm01:10293654-10294541	byo-15-0	byo-15-14	NOTEST	0	0	0	0	1	1	no
Glyma01g08760	Glyma01g08760	Glyma01g08760	Gm01:10355582-10357514	byo-15-0	byo-15-14	NOTEST	0	0	0	0	1	1	no
Glyma01g08870	Glyma01g08870	Glyma01g08870	Gm01:10370136-10371995	byo-15-0	byo-15-14	NOTEST	0	0	0	0	1	1	no
Glyma01g08980	Glyma01g08980	Glyma01g08980	Gm01:10504878-10510246	byo-15-0	byo-15-14	NOTEST	0	0	0	0	1	1	no
Glyma01g09000	Glyma01g09000	Glyma01g09000	Gm01:10570987-10572412	byo-15-0	byo-15-14	NOTEST	0	0	0	0	1	1	no
Glyma01g09010	Glyma01g09010	Glyma01g09010	Gm01:10577946-10583595	byo-15-0	byo-15-14	OK	8.38455	7.55197	-0.150881	0.221659	0.824579	0.965802	no
Glyma01g09040	Glyma01g09040	Glyma01g09040	Gm01:10601638-10602621	byo-15-0	byo-15-14	NOTEST	0	0	0	0	1	1	no
Glyma01g09066	Glyma01g09066	Glyma01g09066	Gm01:10604268-10604624	byo-15-0	byo-15-14	NOTEST	0	0	0	0	1	1	no
Glyma01g09093	Glyma01g09093	Glyma01g09093	Gm01:10716118-10717174	byo-15-0	byo-15-14	NOTEST	0	0	0	0	1	1	no
Glyma01g09120	Glyma01g09120	Glyma01g09120	Gm01:10765526-10768563	byo-15-0	byo-15-14	OK	5.91534	6.35636	0.103741	-0.184322	0.853761	0.972934	no
Glyma01g09160	Glyma01g09160	Glyma01g09160	Gm01:10877246-10880169	byo-15-0	byo-15-14	OK	2.39983	2.0511	-0.226535	0.342102	0.732274	0.943168	no
Glyma01g09190	Glyma01g09190	Glyma01g09190	Gm01:10916139-10919654	byo-15-0	byo-15-14	NOTEST	0	0	0	0	1	1	no
Glyma01g09205	Glyma01g09205	Glyma01g09205	Gm01:10925539-10932891	byo-15-0	byo-15-14	OK	0.902906	0.458691	-0.977053	0.978171	0.32799	0.730475	no
Glyma01g09220	Glyma01g09220	Glyma01g09220	Gm01:10985768-10988999	byo-15-0	byo-15-14	OK	1.96337	3.31929	0.75754	-1.15138	0.249577	0.648844	no
Glyma01g09251	Glyma01g09251	Glyma01g09251	Gm01:11062433-11064112	byo-15-0	byo-15-14	NOTEST	0	0	0	0	1	1	no
Glyma01g09280	Glyma01g09280	Glyma01g09280	Gm01:11172148-11173850	byo-15-0	byo-15-14	NOTEST	0	0.0305285	1.79769e+308	1.79769e+308	0.210186	1	no
Glyma01g09290	Glyma01g09290	Glyma01g09290	Gm01:11208547-11216038	byo-15-0	byo-15-14	OK	6.29386	5.38511	-0.224968	0.382835	0.701842	0.934689	no
Glyma01g09310	Glyma01g09310	Glyma01g09310	Gm01:11247803-11256961	byo-15-0	byo-15-14	OK	80.0844	51.9891	-0.623313	0.860962	0.389259	0.781651	no
Glyma01g09340	Glyma01g09340	Glyma01g09340	Gm01:11290152-11290409	byo-15-0	byo-15-14	NOTEST	0	0	0	0	1	1	no
Glyma01g09350	Glyma01g09350	Glyma01g09350	Gm01:11294639-11296592	byo-15-0	byo-15-14	NOTEST	0	0	0	0	1	1	no
Glyma01g09360	Glyma01g09360	Glyma01g09360	Gm01:11308064-11312690	byo-15-0	byo-15-14	OK	1.01011	0.831173	-0.281291	0.337456	0.735773	0.944107	no
Glyma01g09381	Glyma01g09381	Glyma01g09381	Gm01:11366555-11369128	byo-15-0	byo-15-14	NOTEST	0	0	0	0	1	1	no
Glyma01g09400	Glyma01g09400	Glyma01g09400	Gm01:11464172-11469476	byo-15-0	byo-15-14	OK	3.94394	6.16285	0.643961	-1.02122	0.307152	0.711327	no
Glyma01g09410	Glyma01g09410	Glyma01g09410	Gm01:11464172-11469476	byo-15-0	byo-15-14	NOTEST	0	0	0	0	1	1	no
Glyma01g09420	Glyma01g09420	Glyma01g09420	Gm01:11496634-11503018	byo-15-0	byo-15-14	OK	3.13592	2.25819	-0.473722	0.725732	0.468003	0.833162	no
Glyma01g09460	Glyma01g09460	Glyma01g09460	Gm01:11555183-11556227	byo-15-0	byo-15-14	OK	2.01433	0.415343	-2.27793	2.38441	0.0171063	0.141734	no
Glyma01g09481	Glyma01g09481	Glyma01g09481	Gm01:11560220-11561128	byo-15-0	byo-15-14	NOTEST	0	0	0	0	1	1	no
Glyma01g09500	Glyma01g09500	Glyma01g09500	Gm01:11608787-11608970	byo-15-0	byo-15-14	NOTEST	0	0	0	0	1	1	no
Glyma01g09510	Glyma01g09510	Glyma01g09510	Gm01:11675230-11676337	byo-15-0	byo-15-14	NOTEST	0.161334	0	-1.79769e+308	-1.79769e+308	0.0476234	1	no
Glyma01g09515	Glyma01g09515	Glyma01g09515	Gm01:11687514-11688465	byo-15-0	byo-15-14	NOTEST	0	0	0	0	1	1	no
Glyma01g09520	Glyma01g09520	Glyma01g09520	Gm01:11695475-11701510	byo-15-0	byo-15-14	OK	8.70294	24.6895	1.50432	-2.5828	0.00980028	0.0992665	no
Glyma01g09530	Glyma01g09530	Glyma01g09530	Gm01:11703243-11703468	byo-15-0	byo-15-14	OK	13.5374	3.19112	-2.08482	1.04853	0.294397	0.699297	no
Glyma01g09540	Glyma01g09540	Glyma01g09540	Gm01:11708034-11708550	byo-15-0	byo-15-14	OK	0.459526	0.221904	-1.05021	0.34747	0.728238	0.942539	no
Glyma01g09581	Glyma01g09581	Glyma01g09581	Gm01:11738401-11738872	byo-15-0	byo-15-14	NOTEST	0	0	0	0	1	1	no
Glyma01g09620	Glyma01g09620	Glyma01g09620	Gm01:11916861-11920298	byo-15-0	byo-15-14	NOTEST	0	0	0	0	1	1	no
Glyma01g09631	Glyma01g09631	Glyma01g09631	Gm01:11934522-11935027	byo-15-0	byo-15-14	NOTEST	0	0	0	0	1	1	no
Glyma01g09640	Glyma01g09640	Glyma01g09640	Gm01:11967121-11968573	byo-15-0	byo-15-14	OK	5.10408	2.40091	-1.08807	1.6691	0.0950966	0.401878	no
Glyma01g09650	Glyma01g09650	Glyma01g09650	Gm01:11971139-11974007	byo-15-0	byo-15-14	NOTEST	0	0.228428	1.79769e+308	1.79769e+308	0.0313809	1	no
Glyma01g09660	Glyma01g09660	Glyma01g09660	Gm01:11996466-12008222	byo-15-0	byo-15-14	OK	1.94287	1.85241	-0.068786	0.0978765	0.92203	0.987188	no
Glyma01g09860	Glyma01g09860	Glyma01g09860	Gm01:12384414-12385443	byo-15-0	byo-15-14	NOTEST	0	0	0	0	1	1	no
Glyma01g09900	Glyma01g09900	Glyma01g09900	Gm01:12528614-12537191	byo-15-0	byo-15-14	NOTEST	0.413518	0.0673016	-2.61924	1.81417	0.0696509	1	no
Glyma01g09920	Glyma01g09920	Glyma01g09920	Gm01:12588417-12590126	byo-15-0	byo-15-14	OK	2.76782	3.36163	0.280411	-0.421785	0.673182	0.927236	no
Glyma01g09948	Glyma01g09948	Glyma01g09948	Gm01:12598148-12598766	byo-15-0	byo-15-14	NOTEST	0	0	0	0	1	1	no
Glyma01g09976	Glyma01g09976	Glyma01g09976	Gm01:12599050-12599537	byo-15-0	byo-15-14	NOTEST	0	0	0	0	1	1	no
Glyma01g10004	Glyma01g10004	Glyma01g10004	Gm01:12745024-12746402	byo-15-0	byo-15-14	NOTEST	0	0.0308028	1.79769e+308	1.79769e+308	0.210186	1	no
Glyma01g10032	Glyma01g10032	Glyma01g10032	Gm01:12760733-12762383	byo-15-0	byo-15-14	NOTEST	0	0	0	0	1	1	no
Glyma01g10060	Glyma01g10060	Glyma01g10060	Gm01:12803637-12806519	byo-15-0	byo-15-14	NOTEST	0	0	0	0	1	1	no
Glyma01g10070	Glyma01g10070	Glyma01g10070	Gm01:12864161-12867113	byo-15-0	byo-15-14	LOWDATA	0	0	-1.62879	0	1	1	no
Glyma01g10081	Glyma01g10081	Glyma01g10081	Gm01:12864161-12867113	byo-15-0	byo-15-14	OK	319.75	103.394	-1.62879	1.93286	0.053254	0.285656	no
Glyma01g10090	Glyma01g10090	Glyma01g10090	Gm01:12870303-12870537	byo-15-0	byo-15-14	NOTEST	0	0	0	0	1	1	no
Glyma01g10100	Glyma01g10100	Glyma01g10100	Gm01:12915879-12921146	byo-15-0	byo-15-14	OK	1.64202	0.891332	-0.881437	1.31255	0.189334	0.57091	no
Glyma01g10121	Glyma01g10121	Glyma01g10121	Gm01:13008740-13009964	byo-15-0	byo-15-14	NOTEST	0.130452	0	-1.79769e+308	-1.79769e+308	0.108187	1	no
Glyma01g10141	Glyma01g10141	Glyma01g10141	Gm01:13045087-13045509	byo-15-0	byo-15-14	NOTEST	0	0	0	0	1	1	no
Glyma01g10160	Glyma01g10160	Glyma01g10160	Gm01:13068289-13070591	byo-15-0	byo-15-14	OK	1.53679	1.31614	-0.223604	0.263595	0.792092	0.959952	no
Glyma01g10183	Glyma01g10183	Glyma01g10183	Gm01:13094881-13100738	byo-15-0	byo-15-14	NOTEST	0	0	0	0	1	1	no
Glyma01g10206	Glyma01g10206	Glyma01g10206	Gm01:13259515-13263715	byo-15-0	byo-15-14	NOTEST	0	0	0	0	1	1	no
Glyma01g10231	Glyma01g10231	Glyma01g10231	Gm01:13305441-13308517	byo-15-0	byo-15-14	NOTEST	0	0	0	0	1	1	no
Glyma01g10254	Glyma01g10254	Glyma01g10254	Gm01:13309389-13321481	byo-15-0	byo-15-14	NOTEST	0	0.0128253	1.79769e+308	1.79769e+308	0.127239	1	no
Glyma01g10278	Glyma01g10278	Glyma01g10278	Gm01:13324783-13327645	byo-15-0	byo-15-14	NOTEST	0	0	0	0	1	1	no
Glyma01g10302	Glyma01g10302	Glyma01g10302	Gm01:13355409-13356481	byo-15-0	byo-15-14	NOTEST	0	0	0	0	1	1	no
Glyma01g10326	Glyma01g10326	Glyma01g10326	Gm01:13416710-13417813	byo-15-0	byo-15-14	NOTEST	0	0	0	0	1	1	no
Glyma01g10350	Glyma01g10350	Glyma01g10350	Gm01:13419562-13420937	byo-15-0	byo-15-14	NOTEST	0	0	0	0	1	1	no
Glyma01g10371	Glyma01g10371	Glyma01g10371	Gm01:13433576-13434202	byo-15-0	byo-15-14	OK	1.45441	1.46065	0.00617253	-0.00697267	0.994437	0.999269	no
Glyma01g10390	Glyma01g10390	Glyma01g10390	Gm01:13444506-13445181	byo-15-0	byo-15-14	OK	1.0478	0.712214	-0.556978	0.500333	0.616841	0.907895	no
Glyma01g10600	Glyma01g10600	Glyma01g10600	Gm01:13782194-13783121	byo-15-0	byo-15-14	NOTEST	0.0856692	0.0818167	-0.0663814	0.0385524	0.969247	1	no
Glyma01g10610	Glyma01g10610	Glyma01g10610	Gm01:13795843-13799755	byo-15-0	byo-15-14	OK	1.98466	2.87306	0.533696	-0.837057	0.40256	0.790526	no
Glyma01g10730	Glyma01g10730	Glyma01g10730	Gm01:13960625-13962588	byo-15-0	byo-15-14	OK	0.660002	1.34301	1.02492	-1.09367	0.2741	0.676736	no
Glyma01g10850	Glyma01g10850	Glyma01g10850	Gm01:14070871-14087892	byo-15-0	byo-15-14	OK	2.13333	2.6332	0.30371	-0.462286	0.643876	0.918614	no
Glyma01g10880	Glyma01g10880	Glyma01g10880	Gm01:14112119-14118766	byo-15-0	byo-15-14	OK	1.89867	3.38463	0.834006	-1.22848	0.219266	0.611707	no
Glyma01g10900	Glyma01g10900	Glyma01g10900	Gm01:14129302-14130710	byo-15-0	byo-15-14	NOTEST	0	0	0	0	1	1	no
Glyma01g11110	Glyma01g11110	Glyma01g11110	Gm01:14247142-14248189	byo-15-0	byo-15-14	NOTEST	0	0.101514	1.79769e+308	1.79769e+308	0.0814107	1	no
Glyma01g11130	Glyma01g11130	Glyma01g11130	Gm01:14320794-14324110	byo-15-0	byo-15-14	NOTEST	0	0.252677	1.79769e+308	1.79769e+308	0.0313809	1	no
Glyma01g11180	Glyma01g11180	Glyma01g11180	Gm01:14568533-14568824	byo-15-0	byo-15-14	OK	16781	13035.1	-0.364435	0.385778	0.699661	0.933689	no
Glyma01g11390	Glyma01g11390	Glyma01g11390	Gm01:14807028-14809655	byo-15-0	byo-15-14	OK	13.8263	9.14862	-0.595788	0.965536	0.334276	0.736249	no
Glyma01g11473	Glyma01g11473	Glyma01g11473	Gm01:14947313-14947773	byo-15-0	byo-15-14	NOTEST	0	0	0	0	1	1	no
Glyma01g11556	Glyma01g11556	Glyma01g11556	Gm01:14947841-14948129	byo-15-0	byo-15-14	NOTEST	0	0	0	0	1	1	no
Glyma01g11640	Glyma01g11640	Glyma01g11640	Gm01:14972818-14973806	byo-15-0	byo-15-14	OK	145.004	60.7531	-1.25507	2.05493	0.0398854	0.239825	no
Glyma01g11755	Glyma01g11755	Glyma01g11755	Gm01:15083417-15085790	byo-15-0	byo-15-14	NOTEST	0	0	0	0	1	1	no
Glyma01g11870	Glyma01g11870	Glyma01g11870	Gm01:15195053-15195880	byo-15-0	byo-15-14	OK	112.636	192.414	0.772544	-1.22861	0.219217	0.611699	no
Glyma01g12310	Glyma01g12310	Glyma01g12310	Gm01:15500343-15500912	byo-15-0	byo-15-14	NOTEST	0	0	0	0	1	1	no
Glyma01g12340	Glyma01g12340	Glyma01g12340	Gm01:15542210-15548262	byo-15-0	byo-15-14	OK	8.46692	8.9231	0.0757073	-0.129983	0.89658	0.981909	no
Glyma01g12740	Glyma01g12740	Glyma01g12740	Gm01:15937028-15939729	byo-15-0	byo-15-14	OK	3.91324	4.43807	0.18157	-0.318423	0.750164	0.948366	no
Glyma01g12840	Glyma01g12840	Glyma01g12840	Gm01:15948220-15953470	byo-15-0	byo-15-14	NOTEST	0.0945971	0.369244	1.96471	-1.27456	0.202464	1	no
Glyma01g12940	Glyma01g12940	Glyma01g12940	Gm01:16087453-16089518	byo-15-0	byo-15-14	OK	0.684656	0.707132	0.0466006	-0.0556686	0.955606	0.99348	no
Glyma01g12955	Glyma01g12955	Glyma01g12955	Gm01:16103170-16106499	byo-15-0	byo-15-14	NOTEST	0	0	0	0	1	1	no
Glyma01g12970	Glyma01g12970	Glyma01g12970	Gm01:16134796-16136261	byo-15-0	byo-15-14	OK	3.52866	3.92426	0.153301	-0.243142	0.807896	0.962586	no
Glyma01g13170	Glyma01g13170	Glyma01g13170	Gm01:16335425-16339127	byo-15-0	byo-15-14	OK	113.594	51.7396	-1.13455	1.61988	0.105257	0.424383	no
Glyma01g13390	Glyma01g13390	Glyma01g13390	Gm01:16722784-16724403	byo-15-0	byo-15-14	NOTEST	0	0	0	0	1	1	no
Glyma01g13400	Glyma01g13400	Glyma01g13400	Gm01:16727753-16728455	byo-15-0	byo-15-14	NOTEST	0	0	0	0	1	1	no
Glyma01g13410	Glyma01g13410	Glyma01g13410	Gm01:16732842-16733939	byo-15-0	byo-15-14	NOTEST	0	0.0289036	1.79769e+308	1.79769e+308	0.210186	1	no
Glyma01g13532	Glyma01g13532	Glyma01g13532	Gm01:16745457-16750194	byo-15-0	byo-15-14	NOTEST	0.284657	0.298221	0.0671581	-0.0483238	0.961458	1	no
Glyma01g13654	Glyma01g13654	Glyma01g13654	Gm01:16827427-16868761	byo-15-0	byo-15-14	OK	3.13038	2.95711	-0.0821522	0.125773	0.899912	0.982292	no
Glyma01g13777	Glyma01g13777	Glyma01g13777	Gm01:16940733-16941754	byo-15-0	byo-15-14	NOTEST	0	0	0	0	1	1	no
Glyma01g13900	Glyma01g13900	Glyma01g13900	Gm01:17306260-17308391	byo-15-0	byo-15-14	NOTEST	0	0.0207613	1.79769e+308	1.79769e+308	0.210186	1	no
Glyma01g13930	Glyma01g13930	Glyma01g13930	Gm01:17320003-17321677	byo-15-0	byo-15-14	NOTEST	0.395351	0.430031	0.121306	-0.128579	0.897691	1	no
Glyma01g13945	Glyma01g13945	Glyma01g13945	Gm01:17420498-17470577	byo-15-0	byo-15-14	NOTEST	0.214308	0.230238	0.103437	-0.107975	0.914016	1	no
Glyma01g13960	Glyma01g13960	Glyma01g13960	Gm01:17481711-17482061	byo-15-0	byo-15-14	NOTEST	0	0	0	0	1	1	no
Glyma01g14160	Glyma01g14160	Glyma01g14160	Gm01:17627819-17629241	byo-15-0	byo-15-14	NOTEST	0	0	0	0	1	1	no
Glyma01g14266	Glyma01g14266	Glyma01g14266	Gm01:17633685-17639586	byo-15-0	byo-15-14	NOTEST	0	0	0	0	1	1	no
Glyma01g14373	Glyma01g14373	Glyma01g14373	Gm01:18006948-18034570	byo-15-0	byo-15-14	OK	4.65161	6.15177	0.403273	-0.710881	0.477158	0.839203	no
Glyma01g14480	Glyma01g14480	Glyma01g14480	Gm01:18042133-18046082	byo-15-0	byo-15-14	OK	29.2646	23.1304	-0.339365	0.603288	0.546317	0.877432	no
Glyma01g14500	Glyma01g14500	Glyma01g14500	Gm01:18130228-18132625	byo-15-0	byo-15-14	NOTEST	0	0	0	0	1	1	no
Glyma01g14700	Glyma01g14700	Glyma01g14700	Gm01:18300892-18301399	byo-15-0	byo-15-14	OK	7.0899	4.7035	-0.592032	0.801944	0.422585	0.806638	no
Glyma01g14733	Glyma01g14733	Glyma01g14733	Gm01:18318922-18323085	byo-15-0	byo-15-14	OK	1.02559	0.776762	-0.400904	0.535466	0.592327	0.897385	no
Glyma01g14766	Glyma01g14766	Glyma01g14766	Gm01:18346082-18347761	byo-15-0	byo-15-14	NOTEST	0.194102	0.264115	0.44435	-0.427988	0.66866	1	no
Glyma01g14800	Glyma01g14800	Glyma01g14800	Gm01:18356149-18373966	byo-15-0	byo-15-14	OK	5.34096	5.06708	-0.0759437	0.127398	0.898626	0.982197	no
Glyma01g14905	Glyma01g14905	Glyma01g14905	Gm01:18507857-18508875	byo-15-0	byo-15-14	NOTEST	0	0	0	0	1	1	no
Glyma01g15010	Glyma01g15010	Glyma01g15010	Gm01:18517441-18518370	byo-15-0	byo-15-14	NOTEST	0	0	0	0	1	1	no
Glyma01g15134	Glyma01g15134	Glyma01g15134	Gm01:18526281-18533321	byo-15-0	byo-15-14	OK	1.44531	0.461427	-1.64721	2.07539	0.0379507	0.232749	no
Glyma01g15258	Glyma01g15258	Glyma01g15258	Gm01:18637238-18640215	byo-15-0	byo-15-14	NOTEST	0	0.352822	1.79769e+308	1.79769e+308	0.0180541	1	no
Glyma01g15382	Glyma01g15382	Glyma01g15382	Gm01:18694961-18695204	byo-15-0	byo-15-14	NOTEST	0	0	0	0	1	1	no
Glyma01g15506	Glyma01g15506	Glyma01g15506	Gm01:18952413-18962622	byo-15-0	byo-15-14	OK	33.9048	17.1237	-0.985493	1.37973	0.167669	0.537457	no
Glyma01g15630	Glyma01g15630	Glyma01g15630	Gm01:19254139-19255483	byo-15-0	byo-15-14	NOTEST	0.256839	0.0747982	-1.77979	1.19057	0.233823	1	no
Glyma01g15687	Glyma01g15687	Glyma01g15687	Gm01:19474756-19475786	byo-15-0	byo-15-14	NOTEST	0	0	0	0	1	1	no
Glyma01g15744	Glyma01g15744	Glyma01g15744	Gm01:19561924-19565934	byo-15-0	byo-15-14	NOTEST	0	0	0	0	1	1	no
Glyma01g15802	Glyma01g15802	Glyma01g15802	Gm01:19569955-19570642	byo-15-0	byo-15-14	NOTEST	0	0	0	0	1	1	no
Glyma01g15860	Glyma01g15860	Glyma01g15860	Gm01:19642510-19643505	byo-15-0	byo-15-14	NOTEST	0	0.0694262	1.79769e+308	1.79769e+308	0.210186	1	no
Glyma01g15883	Glyma01g15883	Glyma01g15883	Gm01:19661251-19662687	byo-15-0	byo-15-14	NOTEST	0	0	0	0	1	1	no
Glyma01g15906	Glyma01g15906	Glyma01g15906	Gm01:19730841-19731653	byo-15-0	byo-15-14	NOTEST	0	0	0	0	1	1	no
Glyma01g15930	Glyma01g15930	Glyma01g15930	Gm01:19793857-19799930	byo-15-0	byo-15-14	OK	42.0121	11.5104	-1.86787	3.10253	0.00191876	0.0324311	yes
Glyma01g16140	Glyma01g16140	Glyma01g16140	Gm01:20041371-20043743	byo-15-0	byo-15-14	OK	0	0.714742	1.79769e+308	1.79769e+308	0.0118331	0.111787	no
Glyma01g16250	Glyma01g16250	Glyma01g16250	Gm01:20048200-20050535	byo-15-0	byo-15-14	NOTEST	0	0	0	0	1	1	no
Glyma01g16360	Glyma01g16360	Glyma01g16360	Gm01:20233418-20235447	byo-15-0	byo-15-14	OK	0.856449	0.835814	-0.0351849	0.0379985	0.969689	0.995445	no
Glyma01g16370	Glyma01g16370	Glyma01g16370	Gm01:20243646-20255339	byo-15-0	byo-15-14	OK	5.21782	4.8867	-0.0945869	0.152827	0.878534	0.977934	no
Glyma01g16375	Glyma01g16375	Glyma01g16375	Gm01:20243646-20255339	byo-15-0	byo-15-14	OK	0.487921	2.08694	2.09667	-0.188756	0.850284	0.972143	no
Glyma01g16380	Glyma01g16380	Glyma01g16380	Gm01:20340974-20356558	byo-15-0	byo-15-14	OK	36.824	19.6123	-0.908888	1.50612	0.132035	0.474975	no
Glyma01g16526	Glyma01g16526	Glyma01g16526	Gm01:20473820-20507463	byo-15-0	byo-15-14	OK	4.92649	5.18078	0.0726074	-0.100614	0.919857	0.986667	no
Glyma01g16673	Glyma01g16673	Glyma01g16673	Gm01:20473820-20507463	byo-15-0	byo-15-14	NOTEST	0.149305	0.199033	0.414738	-0.150624	0.880272	1	no
Glyma01g16820	Glyma01g16820	Glyma01g16820	Gm01:20713503-20720624	byo-15-0	byo-15-14	OK	6.73014	5.05862	-0.411892	0.720221	0.471389	0.834942	no
Glyma01g17030	Glyma01g17030	Glyma01g17030	Gm01:21011809-21014457	byo-15-0	byo-15-14	NOTEST	0.403007	0.417161	0.0497977	-0.0464511	0.962951	1	no
Glyma01g17230	Glyma01g17230	Glyma01g17230	Gm01:21161585-21162372	byo-15-0	byo-15-14	OK	12.2146	8.03238	-0.604701	0.984735	0.324754	0.727496	no
Glyma01g17240	Glyma01g17240	Glyma01g17240	Gm01:21232889-21235373	byo-15-0	byo-15-14	OK	1.93271	1.3467	-0.52119	0.679259	0.496974	0.850425	no
Glyma01g17271	Glyma01g17271	Glyma01g17271	Gm01:21300956-21302664	byo-15-0	byo-15-14	NOTEST	0	0	0	0	1	1	no
Glyma01g17300	Glyma01g17300	Glyma01g17300	Gm01:21447376-21448520	byo-15-0	byo-15-14	OK	42.3733	9.50804	-2.15593	3.6719	0.000240753	0.00711453	yes
Glyma01g17330	Glyma01g17330	Glyma01g17330	Gm01:21487778-21490647	byo-15-0	byo-15-14	NOTEST	0	0	0	0	1	1	no
Glyma01g17350	Glyma01g17350	Glyma01g17350	Gm01:21601999-21604652	byo-15-0	byo-15-14	OK	3.46009	2.83611	-0.286895	0.480776	0.630675	0.913117	no
Glyma01g17426	Glyma01g17426	Glyma01g17426	Gm01:21677182-21677611	byo-15-0	byo-15-14	NOTEST	0	0	0	0	1	1	no
Glyma01g17503	Glyma01g17503	Glyma01g17503	Gm01:21677719-21680521	byo-15-0	byo-15-14	NOTEST	0	0	0	0	1	1	no
Glyma01g17580	Glyma01g17580	Glyma01g17580	Gm01:21886080-21888825	byo-15-0	byo-15-14	NOTEST	0.0445906	0	-1.79769e+308	-1.79769e+308	0.139927	1	no
Glyma01g17590	Glyma01g17590	Glyma01g17590	Gm01:21937384-21937864	byo-15-0	byo-15-14	NOTEST	0	0	0	0	1	1	no
Glyma01g17820	Glyma01g17820	Glyma01g17820	Gm01:22078170-22079110	byo-15-0	byo-15-14	OK	28.0113	35.6335	0.347225	-0.616254	0.537727	0.872846	no
Glyma01g17850	Glyma01g17850	Glyma01g17850	Gm01:22130113-22137111	byo-15-0	byo-15-14	OK	70.613	24.4952	-1.52744	2.16175	0.0306378	0.203841	no
Glyma01g17870	Glyma01g17870	Glyma01g17870	Gm01:22202473-22210341	byo-15-0	byo-15-14	OK	13.207	9.67561	-0.448877	0.713183	0.475733	0.837985	no
Glyma01g17880	Glyma01g17880	Glyma01g17880	Gm01:22222121-22222938	byo-15-0	byo-15-14	NOTEST	0	0	0	0	1	1	no
Glyma01g18040	Glyma01g18040	Glyma01g18040	Gm01:22484144-22487576	byo-15-0	byo-15-14	OK	9.48587	7.36056	-0.365965	0.646107	0.51821	0.861045	no
Glyma01g18200	Glyma01g18200	Glyma01g18200	Gm01:22687069-22688346	byo-15-0	byo-15-14	OK	0	1.18221	1.79769e+308	1.79769e+308	0.210186	0.5987	no
Glyma01g18360	Glyma01g18360	Glyma01g18360	Gm01:22689358-22689601	byo-15-0	byo-15-14	OK	0	1.86607	1.79769e+308	1.79769e+308	0.127239	0.46581	no
Glyma01g18520	Glyma01g18520	Glyma01g18520	Gm01:22790155-22793135	byo-15-0	byo-15-14	NOTEST	0	0	0	0	1	1	no
Glyma01g18606	Glyma01g18606	Glyma01g18606	Gm01:23174174-23175344	byo-15-0	byo-15-14	NOTEST	0	0.0554541	1.79769e+308	1.79769e+308	0.127239	1	no
Glyma01g18693	Glyma01g18693	Glyma01g18693	Gm01:23245420-23247113	byo-15-0	byo-15-14	NOTEST	0	0	0	0	1	1	no
Glyma01g18780	Glyma01g18780	Glyma01g18780	Gm01:23303293-23306986	byo-15-0	byo-15-14	OK	24.2613	23.1495	-0.0676745	0.11893	0.905331	0.983586	no
Glyma01g18885	Glyma01g18885	Glyma01g18885	Gm01:23422050-23424265	byo-15-0	byo-15-14	NOTEST	0	0	0	0	1	1	no
Glyma01g18990	Glyma01g18990	Glyma01g18990	Gm01:23424891-23425203	byo-15-0	byo-15-14	NOTEST	0	0	0	0	1	1	no
Glyma01g19200	Glyma01g19200	Glyma01g19200	Gm01:23586981-23590259	byo-15-0	byo-15-14	OK	6.6404	3.60561	-0.881029	1.3076	0.191009	0.573632	no
Glyma01g19420	Glyma01g19420	Glyma01g19420	Gm01:23910735-23912214	byo-15-0	byo-15-14	OK	24.554	4.03899	-2.60389	4.31619	1.58745e-05	0.000852642	yes
Glyma01g19820	Glyma01g19820	Glyma01g19820	Gm01:24220923-24227067	byo-15-0	byo-15-14	OK	1.39983	2.47567	0.822567	-1.20424	0.228499	0.623998	no
Glyma01g20030	Glyma01g20030	Glyma01g20030	Gm01:24388541-24405141	byo-15-0	byo-15-14	OK	13.0385	7.72782	-0.75464	0.950371	0.341924	0.744036	no
Glyma01g20130	Glyma01g20130	Glyma01g20130	Gm01:24561667-24562473	byo-15-0	byo-15-14	NOTEST	0	0	0	0	1	1	no
Glyma01g20230	Glyma01g20230	Glyma01g20230	Gm01:24590327-24594299	byo-15-0	byo-15-14	OK	0.942196	3.19678	1.76252	-2.18073	0.0292036	0.197669	no
Glyma01g20306	Glyma01g20306	Glyma01g20306	Gm01:24680832-24681420	byo-15-0	byo-15-14	NOTEST	0	0	0	0	1	1	no
Glyma01g20383	Glyma01g20383	Glyma01g20383	Gm01:24850234-24853077	byo-15-0	byo-15-14	OK	7.48434	6.80085	-0.138159	0.243351	0.807734	0.962586	no
Glyma01g20460	Glyma01g20460	Glyma01g20460	Gm01:24945683-24950931	byo-15-0	byo-15-14	OK	14.6078	68.0866	2.22063	-3.39298	0.000691355	0.0152635	yes
Glyma01g20565	Glyma01g20565	Glyma01g20565	Gm01:25139086-25141476	byo-15-0	byo-15-14	NOTEST	0	0	0	0	1	1	no
Glyma01g20670	Glyma01g20670	Glyma01g20670	Gm01:25147643-25157143	byo-15-0	byo-15-14	OK	21.3294	19.6119	-0.121116	0.212849	0.831445	0.96703	no
Glyma01g20700	Glyma01g20700	Glyma01g20700	Gm01:25222324-25227920	byo-15-0	byo-15-14	OK	20.6605	17.212	-0.263458	0.451256	0.651805	0.920799	no
Glyma01g20710	Glyma01g20710	Glyma01g20710	Gm01:25241778-25246814	byo-15-0	byo-15-14	NOTEST	0	0.0895163	1.79769e+308	1.79769e+308	0.0395942	1	no
Glyma01g20720	Glyma01g20720	Glyma01g20720	Gm01:25343080-25358309	byo-15-0	byo-15-14	OK	2.56803	2.01132	-0.352515	0.550782	0.581783	0.892774	no
Glyma01g20740	Glyma01g20740	Glyma01g20740	Gm01:25402501-25405946	byo-15-0	byo-15-14	OK	0.450544	0.474903	0.0759647	-0.0820393	0.934615	0.98962	no
Glyma01g20751	Glyma01g20751	Glyma01g20751	Gm01:25409531-25409921	byo-15-0	byo-15-14	NOTEST	0	0	0	0	1	1	no
Glyma01g20760	Glyma01g20760	Glyma01g20760	Gm01:25500530-25509163	byo-15-0	byo-15-14	OK	20.4875	17.1014	-0.260625	0.418847	0.675328	0.92806	no
Glyma01g20775	Glyma01g20775	Glyma01g20775	Gm01:25559739-25563228	byo-15-0	byo-15-14	OK	14.6508	18.575	0.342387	-0.59057	0.554809	0.882317	no
Glyma01g20790	Glyma01g20790	Glyma01g20790	Gm01:25566713-25569152	byo-15-0	byo-15-14	OK	0.240641	0.748463	1.63705	-1.48764	0.136846	0.484443	no
Glyma01g20800	Glyma01g20800	Glyma01g20800	Gm01:25569808-25571509	byo-15-0	byo-15-14	NOTEST	0	0.150406	1.79769e+308	1.79769e+308	0.0814107	1	no
Glyma01g20811	Glyma01g20811	Glyma01g20811	Gm01:25640214-25651295	byo-15-0	byo-15-14	OK	5.24094	2.90865	-0.849476	1.5038	0.132633	0.476243	no
Glyma01g20820	Glyma01g20820	Glyma01g20820	Gm01:25640214-25651295	byo-15-0	byo-15-14	LOWDATA	0	0	-0.849476	0	1	1	no
Glyma01g20860	Glyma01g20860	Glyma01g20860	Gm01:25711548-25714121	byo-15-0	byo-15-14	OK	41.6847	24.5287	-0.765048	1.25893	0.208055	0.597647	no
Glyma01g20870	Glyma01g20870	Glyma01g20870	Gm01:25714752-25716813	byo-15-0	byo-15-14	NOTEST	0.207594	0.0575837	-1.85003	1.23756	0.21588	1	no
Glyma01g20885	Glyma01g20885	Glyma01g20885	Gm01:25783765-25787946	byo-15-0	byo-15-14	NOTEST	0	0	0	0	1	1	no
Glyma01g20900	Glyma01g20900	Glyma01g20900	Gm01:25807514-25813526	byo-15-0	byo-15-14	NOTEST	0	0	0	0	1	1	no
Glyma01g20910	Glyma01g20910	Glyma01g20910	Gm01:25867401-25867807	byo-15-0	byo-15-14	NOTEST	0	0	0	0	1	1	no
Glyma01g20920	Glyma01g20920	Glyma01g20920	Gm01:25867821-25870459	byo-15-0	byo-15-14	OK	0.783908	1.01936	0.37891	-0.375734	0.707115	0.936258	no
Glyma01g20935	Glyma01g20935	Glyma01g20935	Gm01:25874290-25875066	byo-15-0	byo-15-14	NOTEST	0.23407	0	-1.79769e+308	-1.79769e+308	0.108187	1	no
Glyma01g20950	Glyma01g20950	Glyma01g20950	Gm01:26043470-26048530	byo-15-0	byo-15-14	OK	2.20947	0.392414	-2.49325	3.26887	0.00107976	0.021067	yes
Glyma01g20970	Glyma01g20970	Glyma01g20970	Gm01:26111521-26112660	byo-15-0	byo-15-14	NOTEST	0	0	0	0	1	1	no
Glyma01g20980	Glyma01g20980	Glyma01g20980	Gm01:26203747-26206343	byo-15-0	byo-15-14	NOTEST	0	0	0	0	1	1	no
Glyma01g20986	Glyma01g20986	Glyma01g20986	Gm01:26214735-26217244	byo-15-0	byo-15-14	NOTEST	0	0	0	0	1	1	no
Glyma01g20993	Glyma01g20993	Glyma01g20993	Gm01:26218166-26218983	byo-15-0	byo-15-14	NOTEST	0	0	0	0	1	1	no
Glyma01g21000	Glyma01g21000	Glyma01g21000	Gm01:26227617-26228265	byo-15-0	byo-15-14	NOTEST	0	0	0	0	1	1	no
Glyma01g21120	Glyma01g21120	Glyma01g21120	Gm01:26230555-26237293	byo-15-0	byo-15-14	NOTEST	0	0.0173204	1.79769e+308	1.79769e+308	0.318019	1	no
Glyma01g21241	Glyma01g21241	Glyma01g21241	Gm01:26358875-26362351	byo-15-0	byo-15-14	NOTEST	0	0	0	0	1	1	no
Glyma01g21360	Glyma01g21360	Glyma01g21360	Gm01:26380864-26392487	byo-15-0	byo-15-14	OK	2.39365	2.51137	0.0692592	-0.102222	0.91858	0.986289	no
Glyma01g21480	Glyma01g21480	Glyma01g21480	Gm01:26542098-26544485	byo-15-0	byo-15-14	OK	1.33342	2.2117	0.730025	-1.10569	0.268862	0.670875	no
Glyma01g21500	Glyma01g21500	Glyma01g21500	Gm01:26596018-26599902	byo-15-0	byo-15-14	OK	41.2762	17.1305	-1.26874	2.22881	0.0258266	0.183357	no
Glyma01g21510	Glyma01g21510	Glyma01g21510	Gm01:26672645-26677024	byo-15-0	byo-15-14	OK	2.08315	0.882008	-1.2399	1.37619	0.168763	0.539417	no
Glyma01g21521	Glyma01g21521	Glyma01g21521	Gm01:26725662-26726466	byo-15-0	byo-15-14	NOTEST	0	0	0	0	1	1	no
Glyma01g21530	Glyma01g21530	Glyma01g21530	Gm01:26737266-26739888	byo-15-0	byo-15-14	NOTEST	0	0.091537	1.79769e+308	1.79769e+308	0.179254	1	no
Glyma01g21540	Glyma01g21540	Glyma01g21540	Gm01:26740703-26749646	byo-15-0	byo-15-14	NOTEST	0.385304	0.374509	-0.0409986	0.0337382	0.973086	1	no
Glyma01g21570	Glyma01g21570	Glyma01g21570	Gm01:26771286-26773122	byo-15-0	byo-15-14	NOTEST	0	0	0	0	1	1	no
Glyma01g21575	Glyma01g21575	Glyma01g21575	Gm01:26798193-26799005	byo-15-0	byo-15-14	NOTEST	0	0	0	0	1	1	no
Glyma01g21580	Glyma01g21580	Glyma01g21580	Gm01:26814403-26817180	byo-15-0	byo-15-14	NOTEST	0.149855	0	-1.79769e+308	-1.79769e+308	0.0402001	1	no
Glyma01g21590	Glyma01g21590	Glyma01g21590	Gm01:26883578-26885952	byo-15-0	byo-15-14	NOTEST	0	0	0	0	1	1	no
Glyma01g21620	Glyma01g21620	Glyma01g21620	Gm01:26918441-26921225	byo-15-0	byo-15-14	NOTEST	0.162272	0.170289	0.069566	-0.06265	0.950045	1	no
Glyma01g21630	Glyma01g21630	Glyma01g21630	Gm01:26936772-26938129	byo-15-0	byo-15-14	NOTEST	0	0	0	0	1	1	no
Glyma01g21660	Glyma01g21660	Glyma01g21660	Gm01:27033743-27042354	byo-15-0	byo-15-14	OK	0.628694	2.75759	2.13298	-2.82454	0.00473488	0.0611773	no
Glyma01g21680	Glyma01g21680	Glyma01g21680	Gm01:27082459-27084583	byo-15-0	byo-15-14	OK	3.59774	2.80022	-0.36155	0.538836	0.59	0.896283	no
Glyma01g21707	Glyma01g21707	Glyma01g21707	Gm01:27099239-27134127	byo-15-0	byo-15-14	OK	3.37156	2.23264	-0.594668	0.885886	0.375679	0.771168	no
Glyma01g21734	Glyma01g21734	Glyma01g21734	Gm01:27099239-27134127	byo-15-0	byo-15-14	NOTEST	0.168492	0.366512	1.12118	-0.570457	0.568368	1	no
Glyma01g21762	Glyma01g21762	Glyma01g21762	Gm01:27142763-27149757	byo-15-0	byo-15-14	NOTEST	0	0	0	0	1	1	no
Glyma01g21790	Glyma01g21790	Glyma01g21790	Gm01:27193609-27195324	byo-15-0	byo-15-14	NOTEST	0	0	0	0	1	1	no
Glyma01g21831	Glyma01g21831	Glyma01g21831	Gm01:27209475-27244035	byo-15-0	byo-15-14	OK	0.497882	0.350168	-0.507758	0.464463	0.642316	0.917942	no
Glyma01g21870	Glyma01g21870	Glyma01g21870	Gm01:27283470-27283944	byo-15-0	byo-15-14	NOTEST	0	0	0	0	1	1	no
Glyma01g21900	Glyma01g21900	Glyma01g21900	Gm01:27377288-27379936	byo-15-0	byo-15-14	OK	1.35432	3.02397	1.15888	-1.6786	0.0932303	0.397937	no
Glyma01g22120	Glyma01g22120	Glyma01g22120	Gm01:27653934-27655968	byo-15-0	byo-15-14	NOTEST	0	0.0289157	1.79769e+308	1.79769e+308	0.210186	1	no
Glyma01g22131	Glyma01g22131	Glyma01g22131	Gm01:27671430-27681519	byo-15-0	byo-15-14	NOTEST	0	0	0	0	1	1	no
Glyma01g22140	Glyma01g22140	Glyma01g22140	Gm01:27681952-27683220	byo-15-0	byo-15-14	NOTEST	0	0.0520821	1.79769e+308	1.79769e+308	0.210186	1	no
Glyma01g22160	Glyma01g22160	Glyma01g22160	Gm01:27743827-27745117	byo-15-0	byo-15-14	OK	5.48008	3.07206	-0.834992	1.25273	0.210304	0.598852	no
Glyma01g22170	Glyma01g22170	Glyma01g22170	Gm01:27746481-27751766	byo-15-0	byo-15-14	OK	17.2654	15.8822	-0.12047	0.214306	0.830308	0.96703	no
Glyma01g22180	Glyma01g22180	Glyma01g22180	Gm01:27781683-27784987	byo-15-0	byo-15-14	OK	12.3611	7.53148	-0.714802	1.17339	0.240638	0.638888	no
Glyma01g22195	Glyma01g22195	Glyma01g22195	Gm01:27825362-27840530	byo-15-0	byo-15-14	NOTEST	0.0440673	0.0194825	-1.17753	0.301815	0.762793	1	no
Glyma01g22210	Glyma01g22210	Glyma01g22210	Gm01:27825362-27840530	byo-15-0	byo-15-14	OK	1.14765	0.976744	-0.232631	0.252462	0.800684	0.96176	no
Glyma01g22260	Glyma01g22260	Glyma01g22260	Gm01:27963645-27965402	byo-15-0	byo-15-14	OK	3.79488	7.65786	1.01289	-1.72945	0.0837294	0.372862	no
Glyma01g22333	Glyma01g22333	Glyma01g22333	Gm01:28079064-28083033	byo-15-0	byo-15-14	NOTEST	0.154422	0.0619205	-1.31839	0.61688	0.537314	1	no
Glyma01g22406	Glyma01g22406	Glyma01g22406	Gm01:28104831-28117466	byo-15-0	byo-15-14	OK	6.20375	6.01993	-0.0433943	0.0769665	0.93865	0.990112	no
Glyma01g22480	Glyma01g22480	Glyma01g22480	Gm01:28151173-28153211	byo-15-0	byo-15-14	OK	4.67353	5.13869	0.136888	-0.233528	0.815352	0.964239	no
Glyma01g22490	Glyma01g22490	Glyma01g22490	Gm01:28188535-28194784	byo-15-0	byo-15-14	OK	22.7492	5.48515	-2.05221	3.52886	0.000417351	0.0106602	yes
Glyma01g22501	Glyma01g22501	Glyma01g22501	Gm01:28205872-28206502	byo-15-0	byo-15-14	OK	0	1.29467	1.79769e+308	1.79769e+308	0.210186	0.5987	no
Glyma01g22510	Glyma01g22510	Glyma01g22510	Gm01:28236453-28241841	byo-15-0	byo-15-14	OK	1.59718	1.72259	0.109053	-0.15482	0.876963	0.977735	no
Glyma01g22530	Glyma01g22530	Glyma01g22530	Gm01:28336960-28340913	byo-15-0	byo-15-14	NOTEST	0.0427401	0.0945265	1.14513	-0.607114	0.543775	1	no
Glyma01g22542	Glyma01g22542	Glyma01g22542	Gm01:28390587-28392968	byo-15-0	byo-15-14	OK	1.19411	1.77193	0.569389	-0.61658	0.537512	0.872672	no
Glyma01g22554	Glyma01g22554	Glyma01g22554	Gm01:28393068-28396339	byo-15-0	byo-15-14	OK	0.625296	0.841454	0.428344	-0.508916	0.610811	0.905162	no
Glyma01g22567	Glyma01g22567	Glyma01g22567	Gm01:28416197-28418758	byo-15-0	byo-15-14	NOTEST	0	0	0	0	1	1	no
Glyma01g22580	Glyma01g22580	Glyma01g22580	Gm01:28513351-28526497	byo-15-0	byo-15-14	OK	1.75597	2.45735	0.484835	-0.665973	0.505429	0.854769	no
Glyma01g22600	Glyma01g22600	Glyma01g22600	Gm01:28536103-28539838	byo-15-0	byo-15-14	OK	17.6719	14.5901	-0.276464	0.458391	0.646671	0.919205	no
Glyma01g22610	Glyma01g22610	Glyma01g22610	Gm01:28541141-28542499	byo-15-0	byo-15-14	NOTEST	0.189505	0.0772734	-1.29419	0.844125	0.398599	1	no
Glyma01g22620	Glyma01g22620	Glyma01g22620	Gm01:28543689-28553173	byo-15-0	byo-15-14	OK	107.768	58.1113	-0.891038	1.128	0.259322	0.660603	no
Glyma01g22630	Glyma01g22630	Glyma01g22630	Gm01:28591482-28597660	byo-15-0	byo-15-14	OK	3.09009	3.60039	0.220505	-0.341729	0.732555	0.943168	no
Glyma01g22641	Glyma01g22641	Glyma01g22641	Gm01:28636476-28637827	byo-15-0	byo-15-14	OK	0.76683	2.30183	1.5858	-1.93955	0.0524345	0.283581	no
Glyma01g22650	Glyma01g22650	Glyma01g22650	Gm01:28639438-28642822	byo-15-0	byo-15-14	NOTEST	0	0.0945525	1.79769e+308	1.79769e+308	0.127239	1	no
Glyma01g22670	Glyma01g22670	Glyma01g22670	Gm01:28699702-28704423	byo-15-0	byo-15-14	NOTEST	0.0609138	0	-1.79769e+308	-1.79769e+308	0.108187	1	no
Glyma01g22680	Glyma01g22680	Glyma01g22680	Gm01:28708173-28714632	byo-15-0	byo-15-14	OK	18.0149	15.6759	-0.200641	0.321185	0.74807	0.947722	no
Glyma01g22710	Glyma01g22710	Glyma01g22710	Gm01:28768432-28773021	byo-15-0	byo-15-14	OK	0.922062	1.3319	0.530555	-0.802263	0.422401	0.806523	no
Glyma01g22720	Glyma01g22720	Glyma01g22720	Gm01:28773705-28774862	byo-15-0	byo-15-14	NOTEST	0	0	0	0	1	1	no
Glyma01g22730	Glyma01g22730	Glyma01g22730	Gm01:28777549-28780388	byo-15-0	byo-15-14	NOTEST	0.04856	0	-1.79769e+308	-1.79769e+308	0.185024	1	no
Glyma01g22751	Glyma01g22751	Glyma01g22751	Gm01:28847126-28848359	byo-15-0	byo-15-14	NOTEST	0.26704	0.0358823	-2.89571	1.47818	0.139361	1	no
Glyma01g22770	Glyma01g22770	Glyma01g22770	Gm01:28902721-28902950	byo-15-0	byo-15-14	NOTEST	0	0	0	0	1	1	no
Glyma01g22800	Glyma01g22800	Glyma01g22800	Gm01:28928281-28929701	byo-15-0	byo-15-14	NOTEST	0	0.249204	1.79769e+308	1.79769e+308	0.022106	1	no
Glyma01g22830	Glyma01g22830	Glyma01g22830	Gm01:28986402-28988037	byo-15-0	byo-15-14	OK	0.953515	0.876785	-0.121033	0.13092	0.895838	0.981898	no
Glyma01g22840	Glyma01g22840	Glyma01g22840	Gm01:28991061-29005174	byo-15-0	byo-15-14	NOTEST	0.0452237	0.00939314	-2.2674	0.729636	0.465613	1	no
Glyma01g22850	Glyma01g22850	Glyma01g22850	Gm01:29076299-29082231	byo-15-0	byo-15-14	NOTEST	0.200003	0	-1.79769e+308	-1.79769e+308	0.0165505	1	no
Glyma01g22861	Glyma01g22861	Glyma01g22861	Gm01:29092183-29093676	byo-15-0	byo-15-14	NOTEST	0	0	0	0	1	1	no
Glyma01g22871	Glyma01g22871	Glyma01g22871	Gm01:29147726-29148607	byo-15-0	byo-15-14	OK	14.5703	0.17743	-6.35964	4.73191	2.22422e-06	0.000174427	yes
Glyma01g22880	Glyma01g22880	Glyma01g22880	Gm01:29149880-29152191	byo-15-0	byo-15-14	OK	0.241982	0.501178	1.05042	-1.10151	0.270674	0.673083	no
Glyma01g22910	Glyma01g22910	Glyma01g22910	Gm01:29193663-29195557	byo-15-0	byo-15-14	NOTEST	0	0	0	0	1	1	no
Glyma01g22927	Glyma01g22927	Glyma01g22927	Gm01:29230774-29239997	byo-15-0	byo-15-14	NOTEST	0	0.0736113	1.79769e+308	1.79769e+308	0.284417	1	no
Glyma01g22944	Glyma01g22944	Glyma01g22944	Gm01:29270621-29273823	byo-15-0	byo-15-14	NOTEST	0	0	0	0	1	1	no
Glyma01g22962	Glyma01g22962	Glyma01g22962	Gm01:29296975-29300243	byo-15-0	byo-15-14	NOTEST	0	0.0178071	1.79769e+308	1.79769e+308	0.183825	1	no
Glyma01g22980	Glyma01g22980	Glyma01g22980	Gm01:29388012-29389406	byo-15-0	byo-15-14	NOTEST	0	0	0	0	1	1	no
Glyma01g22990	Glyma01g22990	Glyma01g22990	Gm01:29393119-29399932	byo-15-0	byo-15-14	NOTEST	0.276118	0.109681	-1.33196	1.38827	0.165055	1	no
Glyma01g23015	Glyma01g23015	Glyma01g23015	Gm01:29421939-29425642	byo-15-0	byo-15-14	OK	4.50028	1.22944	-1.87202	1.48628	0.137205	0.485184	no
Glyma01g23040	Glyma01g23040	Glyma01g23040	Gm01:29470009-29471440	byo-15-0	byo-15-14	OK	4.52261	4.28766	-0.0769672	0.121293	0.903459	0.98311	no
Glyma01g23056	Glyma01g23056	Glyma01g23056	Gm01:29471833-29483149	byo-15-0	byo-15-14	OK	3.6605	4.02263	0.136099	-0.227897	0.819726	0.965045	no
Glyma01g23072	Glyma01g23072	Glyma01g23072	Gm01:29511789-29512084	byo-15-0	byo-15-14	NOTEST	0	0	0	0	1	1	no
Glyma01g23089	Glyma01g23089	Glyma01g23089	Gm01:29533330-29533964	byo-15-0	byo-15-14	NOTEST	0	0	0	0	1	1	no
Glyma01g23106	Glyma01g23106	Glyma01g23106	Gm01:29535512-29536834	byo-15-0	byo-15-14	NOTEST	0	0.0851331	1.79769e+308	1.79769e+308	0.230996	1	no
Glyma01g23123	Glyma01g23123	Glyma01g23123	Gm01:29537254-29537802	byo-15-0	byo-15-14	NOTEST	0	0	0	0	1	1	no
Glyma01g23140	Glyma01g23140	Glyma01g23140	Gm01:29565892-29574413	byo-15-0	byo-15-14	NOTEST	0.344429	0.361129	0.0683065	-0.0872971	0.930435	1	no
Glyma01g23150	Glyma01g23150	Glyma01g23150	Gm01:29660957-29665158	byo-15-0	byo-15-14	OK	4.31584	3.5402	-0.285812	0.484495	0.628034	0.912179	no
Glyma01g23180	Glyma01g23180	Glyma01g23180	Gm01:29699064-29704324	byo-15-0	byo-15-14	OK	3.23274	1.47565	-1.13141	1.81763	0.0691206	0.334531	no
Glyma01g23196	Glyma01g23196	Glyma01g23196	Gm01:29809758-29827788	byo-15-0	byo-15-14	OK	8.02372	4.32838	-0.890446	1.05477	0.29153	0.695744	no
Glyma01g23213	Glyma01g23213	Glyma01g23213	Gm01:29809758-29827788	byo-15-0	byo-15-14	OK	4.49477	2.50263	-0.844805	1.10318	0.269947	0.672253	no
Glyma01g23230	Glyma01g23230	Glyma01g23230	Gm01:29843906-29847664	byo-15-0	byo-15-14	OK	3.50208	6.68953	0.933693	-1.57731	0.114724	0.442834	no
Glyma01g23250	Glyma01g23250	Glyma01g23250	Gm01:29855703-29857266	byo-15-0	byo-15-14	NOTEST	0	0	0	0	1	1	no
Glyma01g23300	Glyma01g23300	Glyma01g23300	Gm01:29947728-29948872	byo-15-0	byo-15-14	NOTEST	0	0	0	0	1	1	no
Glyma01g23342	Glyma01g23342	Glyma01g23342	Gm01:29989093-29991297	byo-15-0	byo-15-14	NOTEST	0	0	0	0	1	1	no
Glyma01g23384	Glyma01g23384	Glyma01g23384	Gm01:30079377-30079787	byo-15-0	byo-15-14	NOTEST	0	0.271757	1.79769e+308	1.79769e+308	0.210186	1	no
Glyma01g23427	Glyma01g23427	Glyma01g23427	Gm01:30083471-30150322	byo-15-0	byo-15-14	OK	1.74743	1.66163	-0.0726364	0.115935	0.907704	0.984255	no
Glyma01g23470	Glyma01g23470	Glyma01g23470	Gm01:30208373-30208835	byo-15-0	byo-15-14	NOTEST	0	0	0	0	1	1	no
Glyma01g23534	Glyma01g23534	Glyma01g23534	Gm01:30275109-30281645	byo-15-0	byo-15-14	NOTEST	0	0	0	0	1	1	no
Glyma01g23598	Glyma01g23598	Glyma01g23598	Gm01:30314496-30324821	byo-15-0	byo-15-14	OK	8.08356	7.00317	-0.206981	0.351529	0.725191	0.941352	no
Glyma01g23662	Glyma01g23662	Glyma01g23662	Gm01:30575165-30577235	byo-15-0	byo-15-14	NOTEST	0	0	0	0	1	1	no
Glyma01g23726	Glyma01g23726	Glyma01g23726	Gm01:30704826-30710568	byo-15-0	byo-15-14	OK	5.728	5.81214	0.0210369	-0.0361628	0.971153	0.995445	no
Glyma01g23790	Glyma01g23790	Glyma01g23790	Gm01:30725259-30734274	byo-15-0	byo-15-14	NOTEST	0	0	0	0	1	1	no
Glyma01g23820	Glyma01g23820	Glyma01g23820	Gm01:30803138-30810796	byo-15-0	byo-15-14	OK	4.83072	3.77106	-0.357268	0.513127	0.607863	0.904214	no
Glyma01g23830	Glyma01g23830	Glyma01g23830	Gm01:30834278-30837915	byo-15-0	byo-15-14	OK	5.22888	4.1714	-0.32597	0.535038	0.592623	0.89754	no
Glyma01g23840	Glyma01g23840	Glyma01g23840	Gm01:30921784-30923363	byo-15-0	byo-15-14	NOTEST	0	0	0	0	1	1	no
Glyma01g23870	Glyma01g23870	Glyma01g23870	Gm01:31003666-31006666	byo-15-0	byo-15-14	OK	15.304	7.49385	-1.03013	1.788	0.0737763	0.348065	no
Glyma01g24100	Glyma01g24100	Glyma01g24100	Gm01:31272679-31276347	byo-15-0	byo-15-14	OK	76.1821	46.4587	-0.713505	1.20642	0.227657	0.622593	no
Glyma01g24115	Glyma01g24115	Glyma01g24115	Gm01:31363012-31365202	byo-15-0	byo-15-14	NOTEST	0	0	0	0	1	1	no
Glyma01g24130	Glyma01g24130	Glyma01g24130	Gm01:31382751-31384508	byo-15-0	byo-15-14	NOTEST	0	0	0	0	1	1	no
Glyma01g24136	Glyma01g24136	Glyma01g24136	Gm01:31384592-31388267	byo-15-0	byo-15-14	NOTEST	0	0	0	0	1	1	no
Glyma01g24143	Glyma01g24143	Glyma01g24143	Gm01:31403714-31405886	byo-15-0	byo-15-14	NOTEST	0	0	0	0	1	1	no
Glyma01g24150	Glyma01g24150	Glyma01g24150	Gm01:31406290-31410211	byo-15-0	byo-15-14	OK	0.596209	1.65259	1.47084	-1.78186	0.0747729	0.350639	no
Glyma01g24160	Glyma01g24160	Glyma01g24160	Gm01:31442860-31443621	byo-15-0	byo-15-14	NOTEST	0.163391	0	-1.79769e+308	-1.79769e+308	0.108187	1	no
Glyma01g24360	Glyma01g24360	Glyma01g24360	Gm01:31583729-31587255	byo-15-0	byo-15-14	OK	42.5936	5.56007	-2.93746	4.90707	9.24466e-07	8.31711e-05	yes
Glyma01g24383	Glyma01g24383	Glyma01g24383	Gm01:31655035-31655556	byo-15-0	byo-15-14	NOTEST	0	0	0	0	1	1	no
Glyma01g24406	Glyma01g24406	Glyma01g24406	Gm01:31704492-31706592	byo-15-0	byo-15-14	NOTEST	0	0.340773	1.79769e+308	1.79769e+308	0.0814107	1	no
Glyma01g24430	Glyma01g24430	Glyma01g24430	Gm01:31720084-31726752	byo-15-0	byo-15-14	OK	1.84574	2.51528	0.446518	-0.636618	0.524374	0.865175	no
Glyma01g24455	Glyma01g24455	Glyma01g24455	Gm01:31734753-31736467	byo-15-0	byo-15-14	NOTEST	0.181798	0.211203	0.216294	-0.194791	0.845556	1	no
Glyma01g24480	Glyma01g24480	Glyma01g24480	Gm01:31792540-31792932	byo-15-0	byo-15-14	OK	5.09341	4.12536	-0.304109	0.360331	0.7186	0.93895	no
Glyma01g24495	Glyma01g24495	Glyma01g24495	Gm01:31795450-31795885	byo-15-0	byo-15-14	OK	0.475707	1.49107	1.6482	-1.1666	0.243371	0.642675	no
Glyma01g24510	Glyma01g24510	Glyma01g24510	Gm01:31818673-31828608	byo-15-0	byo-15-14	OK	1.6449	2.32638	0.500087	-0.790067	0.429489	0.810525	no
Glyma01g24515	Glyma01g24515	Glyma01g24515	Gm01:31889614-31891603	byo-15-0	byo-15-14	NOTEST	0	0	0	0	1	1	no
Glyma01g24520	Glyma01g24520	Glyma01g24520	Gm01:31911765-31920749	byo-15-0	byo-15-14	OK	3.95325	3.97101	0.00646925	-0.00934142	0.992547	0.999072	no
Glyma01g24530	Glyma01g24530	Glyma01g24530	Gm01:31964428-31977723	byo-15-0	byo-15-14	NOTEST	0.258419	0.236244	-0.129432	0.134354	0.893123	1	no
Glyma01g24536	Glyma01g24536	Glyma01g24536	Gm01:31981604-31985794	byo-15-0	byo-15-14	NOTEST	0	0	0	0	1	1	no
Glyma01g24543	Glyma01g24543	Glyma01g24543	Gm01:32028704-32031074	byo-15-0	byo-15-14	NOTEST	0	0	0	0	1	1	no
Glyma01g24550	Glyma01g24550	Glyma01g24550	Gm01:32033425-32036205	byo-15-0	byo-15-14	OK	4.05644	5.14332	0.342485	-0.455997	0.648392	0.920008	no
Glyma01g24570	Glyma01g24570	Glyma01g24570	Gm01:32066869-32072424	byo-15-0	byo-15-14	OK	6.6857	6.10636	-0.130765	0.207978	0.835246	0.96788	no
Glyma01g24580	Glyma01g24580	Glyma01g24580	Gm01:32077414-32078744	byo-15-0	byo-15-14	NOTEST	0	0	0	0	1	1	no
Glyma01g24601	Glyma01g24601	Glyma01g24601	Gm01:32084232-32086938	byo-15-0	byo-15-14	OK	9.26611	5.1045	-0.860193	1.04711	0.295047	0.699708	no
Glyma01g24620	Glyma01g24620	Glyma01g24620	Gm01:32161499-32162094	byo-15-0	byo-15-14	NOTEST	0	0	0	0	1	1	no
Glyma01g24650	Glyma01g24650	Glyma01g24650	Gm01:32202535-32211787	byo-15-0	byo-15-14	OK	7.44175	14.8622	0.997931	-1.74507	0.0809727	0.366716	no
Glyma01g24670	Glyma01g24670	Glyma01g24670	Gm01:32220914-32223882	byo-15-0	byo-15-14	OK	0.265633	0.496541	0.90248	-1.06711	0.285922	0.689432	no
Glyma01g24680	Glyma01g24680	Glyma01g24680	Gm01:32231085-32231557	byo-15-0	byo-15-14	NOTEST	0	0	0	0	1	1	no
Glyma01g24710	Glyma01g24710	Glyma01g24710	Gm01:32287633-32289710	byo-15-0	byo-15-14	NOTEST	0.132283	0.0878972	-0.589744	0.529766	0.596274	1	no
Glyma01g24715	Glyma01g24715	Glyma01g24715	Gm01:32301822-32302361	byo-15-0	byo-15-14	NOTEST	0	0	0	0	1	1	no
Glyma01g24720	Glyma01g24720	Glyma01g24720	Gm01:32308210-32311363	byo-15-0	byo-15-14	NOTEST	0	0	0	0	1	1	no
Glyma01g24735	Glyma01g24735	Glyma01g24735	Gm01:32401120-32402034	byo-15-0	byo-15-14	NOTEST	0	0	0	0	1	1	no
Glyma01g24750	Glyma01g24750	Glyma01g24750	Gm01:32402350-32403396	byo-15-0	byo-15-14	NOTEST	0	0	0	0	1	1	no
Glyma01g24771	Glyma01g24771	Glyma01g24771	Gm01:32417415-32418160	byo-15-0	byo-15-14	NOTEST	0	0	0	0	1	1	no
Glyma01g24790	Glyma01g24790	Glyma01g24790	Gm01:32422309-32422465	byo-15-0	byo-15-14	NOTEST	0	0	0	0	1	1	no
Glyma01g24801	Glyma01g24801	Glyma01g24801	Gm01:32490914-32491358	byo-15-0	byo-15-14	NOTEST	0	0	0	0	1	1	no
Glyma01g24811	Glyma01g24811	Glyma01g24811	Gm01:32561178-32561613	byo-15-0	byo-15-14	NOTEST	0	0	0	0	1	1	no
Glyma01g24820	Glyma01g24820	Glyma01g24820	Gm01:32606517-32608233	byo-15-0	byo-15-14	NOTEST	0	0	0	0	1	1	no
Glyma01g24835	Glyma01g24835	Glyma01g24835	Gm01:32612017-32613710	byo-15-0	byo-15-14	NOTEST	0	0	0	0	1	1	no
Glyma01g24850	Glyma01g24850	Glyma01g24850	Gm01:32687318-32692418	byo-15-0	byo-15-14	NOTEST	0	0	0	0	1	1	no
Glyma01g24870	Glyma01g24870	Glyma01g24870	Gm01:32782513-32787123	byo-15-0	byo-15-14	NOTEST	0.0416075	0.0812136	0.964879	-0.667286	0.504589	1	no
Glyma01g24880	Glyma01g24880	Glyma01g24880	Gm01:32798562-32800071	byo-15-0	byo-15-14	OK	2.60882	0.917682	-1.50733	1.91292	0.0557585	0.293214	no
Glyma01g24900	Glyma01g24900	Glyma01g24900	Gm01:32814004-32817943	byo-15-0	byo-15-14	OK	5.96709	4.83337	-0.304	0.481137	0.630419	0.913108	no
Glyma01g24915	Glyma01g24915	Glyma01g24915	Gm01:32834808-32836555	byo-15-0	byo-15-14	NOTEST	0	0	0	0	1	1	no
Glyma01g24931	Glyma01g24931	Glyma01g24931	Gm01:32867175-32870537	byo-15-0	byo-15-14	OK	57.4564	31.6591	-0.859847	1.4294	0.152889	0.512659	no
Glyma01g24945	Glyma01g24945	Glyma01g24945	Gm01:32870727-32871773	byo-15-0	byo-15-14	OK	10.6834	10.646	-0.00506021	0.00828264	0.993391	0.999246	no
Glyma01g24960	Glyma01g24960	Glyma01g24960	Gm01:32900893-32902163	byo-15-0	byo-15-14	NOTEST	0	0	0	0	1	1	no
Glyma01g24975	Glyma01g24975	Glyma01g24975	Gm01:33011689-33012355	byo-15-0	byo-15-14	NOTEST	0	0	0	0	1	1	no
Glyma01g24990	Glyma01g24990	Glyma01g24990	Gm01:33023697-33026836	byo-15-0	byo-15-14	NOTEST	0	0	0	0	1	1	no
Glyma01g25000	Glyma01g25000	Glyma01g25000	Gm01:33038313-33043683	byo-15-0	byo-15-14	NOTEST	0	0	0	0	1	1	no
Glyma01g25010	Glyma01g25010	Glyma01g25010	Gm01:33122056-33128090	byo-15-0	byo-15-14	OK	1.09168	1.62364	0.572685	-0.749485	0.453565	0.826924	no
Glyma01g25040	Glyma01g25040	Glyma01g25040	Gm01:33159095-33163007	byo-15-0	byo-15-14	OK	5.56116	5.23303	-0.0877377	0.150026	0.880744	0.978142	no
Glyma01g25116	Glyma01g25116	Glyma01g25116	Gm01:33175920-33176216	byo-15-0	byo-15-14	NOTEST	0	0	0	0	1	1	no
Glyma01g25193	Glyma01g25193	Glyma01g25193	Gm01:33176938-33177664	byo-15-0	byo-15-14	NOTEST	0	0	0	0	1	1	no
Glyma01g25270	Glyma01g25270	Glyma01g25270	Gm01:33300641-33305517	byo-15-0	byo-15-14	OK	5.25778	3.37921	-0.637769	1.08716	0.276966	0.679483	no
Glyma01g25690	Glyma01g25690	Glyma01g25690	Gm01:33714521-33724227	byo-15-0	byo-15-14	OK	3.73689	8.81809	1.23863	-2.12702	0.0334184	0.214753	no
Glyma01g25710	Glyma01g25710	Glyma01g25710	Gm01:33743092-33750073	byo-15-0	byo-15-14	OK	1.1883	1.36982	0.205084	-0.29986	0.764284	0.952474	no
Glyma01g25734	Glyma01g25734	Glyma01g25734	Gm01:33873561-33877219	byo-15-0	byo-15-14	NOTEST	0	0	0	0	1	1	no
Glyma01g25758	Glyma01g25758	Glyma01g25758	Gm01:33877681-33878910	byo-15-0	byo-15-14	NOTEST	0	0	0	0	1	1	no
Glyma01g25782	Glyma01g25782	Glyma01g25782	Gm01:33892028-33896774	byo-15-0	byo-15-14	NOTEST	0.121748	0.135415	0.153489	-0.148688	0.8818	1	no
Glyma01g25806	Glyma01g25806	Glyma01g25806	Gm01:33911123-33912252	byo-15-0	byo-15-14	NOTEST	0	0	0	0	1	1	no
Glyma01g25830	Glyma01g25830	Glyma01g25830	Gm01:33967102-33969353	byo-15-0	byo-15-14	OK	25.9577	22.8723	-0.182561	0.307186	0.758702	0.950687	no
Glyma01g25861	Glyma01g25861	Glyma01g25861	Gm01:33970039-33970770	byo-15-0	byo-15-14	NOTEST	0	0	0	0	1	1	no
Glyma01g25890	Glyma01g25890	Glyma01g25890	Gm01:34032831-34039400	byo-15-0	byo-15-14	OK	6.38501	2.54781	-1.32543	2.16752	0.0301954	0.202339	no
Glyma01g25903	Glyma01g25903	Glyma01g25903	Gm01:34110636-34112307	byo-15-0	byo-15-14	NOTEST	0	0	0	0	1	1	no
Glyma01g25916	Glyma01g25916	Glyma01g25916	Gm01:34210140-34210872	byo-15-0	byo-15-14	NOTEST	0	0	0	0	1	1	no
Glyma01g25930	Glyma01g25930	Glyma01g25930	Gm01:34244964-34245805	byo-15-0	byo-15-14	OK	0.476002	0	-1.79769e+308	-1.79769e+308	0.0347715	0.220043	no
Glyma01g25940	Glyma01g25940	Glyma01g25940	Gm01:34287073-34295334	byo-15-0	byo-15-14	OK	34.4983	28.8511	-0.257897	0.414681	0.678376	0.928911	no
Glyma01g25960	Glyma01g25960	Glyma01g25960	Gm01:34329634-34332496	byo-15-0	byo-15-14	NOTEST	0.0705808	0.426995	2.59687	-1.63457	0.102139	1	no
Glyma01g25980	Glyma01g25980	Glyma01g25980	Gm01:34344570-34345856	byo-15-0	byo-15-14	NOTEST	0	0	0	0	1	1	no
Glyma01g26010	Glyma01g26010	Glyma01g26010	Gm01:34353206-34357427	byo-15-0	byo-15-14	NOTEST	0	0	0	0	1	1	no
Glyma01g26220	Glyma01g26220	Glyma01g26220	Gm01:34484074-34486309	byo-15-0	byo-15-14	OK	2.68962	3.49299	0.37706	-0.564292	0.572556	0.889879	no
Glyma01g26230	Glyma01g26230	Glyma01g26230	Gm01:34508385-34510490	byo-15-0	byo-15-14	OK	6.18726	41.3119	2.73919	-4.57643	4.72979e-06	0.000319142	yes
Glyma01g26300	Glyma01g26300	Glyma01g26300	Gm01:34545482-34547230	byo-15-0	byo-15-14	OK	5.79501	5.27661	-0.135197	0.209734	0.833875	0.967195	no
Glyma01g26310	Glyma01g26310	Glyma01g26310	Gm01:34591834-34592752	byo-15-0	byo-15-14	NOTEST	0	0	0	0	1	1	no
Glyma01g26325	Glyma01g26325	Glyma01g26325	Gm01:34678298-34679472	byo-15-0	byo-15-14	NOTEST	0	0	0	0	1	1	no
Glyma01g26340	Glyma01g26340	Glyma01g26340	Gm01:34729733-34732217	byo-15-0	byo-15-14	NOTEST	0.116402	0.137705	0.242466	-0.218361	0.827148	1	no
Glyma01g26350	Glyma01g26350	Glyma01g26350	Gm01:34828578-34838846	byo-15-0	byo-15-14	OK	4.15268	3.87226	-0.10087	0.174586	0.861405	0.974621	no
Glyma01g26360	Glyma01g26360	Glyma01g26360	Gm01:34923320-34923989	byo-15-0	byo-15-14	OK	4.32683	13.5212	1.64384	-2.3736	0.0176156	0.144329	no
Glyma01g26570	Glyma01g26570	Glyma01g26570	Gm01:35047812-35050350	byo-15-0	byo-15-14	NOTEST	0.139696	0.0319896	-2.12662	1.06955	0.284822	1	no
Glyma01g26580	Glyma01g26580	Glyma01g26580	Gm01:35128362-35132942	byo-15-0	byo-15-14	NOTEST	0.0901	0.268134	1.57335	-1.11363	0.26544	1	no
Glyma01g26590	Glyma01g26590	Glyma01g26590	Gm01:35185581-35190582	byo-15-0	byo-15-14	NOTEST	0.0399955	0.221883	2.47189	-2.32942	0.0198367	1	no
Glyma01g26600	Glyma01g26600	Glyma01g26600	Gm01:35191726-35193878	byo-15-0	byo-15-14	OK	5.49086	6.11349	0.154965	-0.236621	0.812951	0.963901	no
Glyma01g26606	Glyma01g26606	Glyma01g26606	Gm01:35221753-35222332	byo-15-0	byo-15-14	NOTEST	0	0	0	0	1	1	no
Glyma01g26613	Glyma01g26613	Glyma01g26613	Gm01:35260947-35261763	byo-15-0	byo-15-14	NOTEST	0	0	0	0	1	1	no
Glyma01g26620	Glyma01g26620	Glyma01g26620	Gm01:35271480-35272153	byo-15-0	byo-15-14	NOTEST	0	0	0	0	1	1	no
Glyma01g26650	Glyma01g26650	Glyma01g26650	Gm01:35317654-35328670	byo-15-0	byo-15-14	OK	1.99456	3.08372	0.628598	-0.936858	0.348831	0.74954	no
Glyma01g26670	Glyma01g26670	Glyma01g26670	Gm01:35431736-35435954	byo-15-0	byo-15-14	OK	0.187024	0.662457	1.82461	-1.81538	0.0694649	0.335595	no
Glyma01g26681	Glyma01g26681	Glyma01g26681	Gm01:35464370-35465052	byo-15-0	byo-15-14	NOTEST	0	0	0	0	1	1	no
Glyma01g26690	Glyma01g26690	Glyma01g26690	Gm01:35468032-35472931	byo-15-0	byo-15-14	OK	0.194433	0.459347	1.24031	-1.19563	0.231842	0.627991	no
Glyma01g26700	Glyma01g26700	Glyma01g26700	Gm01:35501543-35506434	byo-15-0	byo-15-14	OK	1.47028	1.36445	-0.10777	0.148552	0.881907	0.978393	no
Glyma01g26750	Glyma01g26750	Glyma01g26750	Gm01:35572394-35581615	byo-15-0	byo-15-14	NOTEST	0.0421187	0	-1.79769e+308	-1.79769e+308	0.185433	1	no
Glyma01g26766	Glyma01g26766	Glyma01g26766	Gm01:35587717-35588464	byo-15-0	byo-15-14	NOTEST	0	0	0	0	1	1	no
Glyma01g26783	Glyma01g26783	Glyma01g26783	Gm01:35595556-35596652	byo-15-0	byo-15-14	NOTEST	0	0	0	0	1	1	no
Glyma01g26800	Glyma01g26800	Glyma01g26800	Gm01:35606472-35610217	byo-15-0	byo-15-14	NOTEST	0	0	0	0	1	1	no
Glyma01g26813	Glyma01g26813	Glyma01g26813	Gm01:35625153-35625890	byo-15-0	byo-15-14	NOTEST	0	0	0	0	1	1	no
Glyma01g26826	Glyma01g26826	Glyma01g26826	Gm01:35632686-35633208	byo-15-0	byo-15-14	NOTEST	0	0	0	0	1	1	no
Glyma01g26840	Glyma01g26840	Glyma01g26840	Gm01:35643767-35646603	byo-15-0	byo-15-14	OK	14.6698	7.77139	-0.916607	1.56397	0.117824	0.448583	no
Glyma01g26860	Glyma01g26860	Glyma01g26860	Gm01:35688241-35692239	byo-15-0	byo-15-14	NOTEST	0	0.0218936	1.79769e+308	1.79769e+308	0.210186	1	no
Glyma01g26900	Glyma01g26900	Glyma01g26900	Gm01:35719443-35723183	byo-15-0	byo-15-14	NOTEST	0	0	0	0	1	1	no
Glyma01g26915	Glyma01g26915	Glyma01g26915	Gm01:35827768-35828303	byo-15-0	byo-15-14	NOTEST	0	0	0	0	1	1	no
Glyma01g26930	Glyma01g26930	Glyma01g26930	Gm01:35832934-35837033	byo-15-0	byo-15-14	OK	39.7074	23.8509	-0.735363	1.10191	0.270501	0.672827	no
Glyma01g26940	Glyma01g26940	Glyma01g26940	Gm01:35863797-35865409	byo-15-0	byo-15-14	OK	3.09116	2.77577	-0.15526	0.234179	0.814846	0.964118	no
Glyma01g26950	Glyma01g26950	Glyma01g26950	Gm01:35866292-35869400	byo-15-0	byo-15-14	OK	42.7346	48.9454	0.195768	-0.310118	0.756471	0.950004	no
Glyma01g26961	Glyma01g26961	Glyma01g26961	Gm01:35952581-35954091	byo-15-0	byo-15-14	NOTEST	0	0	0	0	1	1	no
Glyma01g26970	Glyma01g26970	Glyma01g26970	Gm01:35963018-35964248	byo-15-0	byo-15-14	OK	56.0331	15.4582	-1.85791	3.17773	0.00148433	0.0266192	yes
Glyma01g26981	Glyma01g26981	Glyma01g26981	Gm01:35964318-35966630	byo-15-0	byo-15-14	OK	2.43165	1.38343	-0.813684	0.771033	0.440687	0.81827	no
Glyma01g26990	Glyma01g26990	Glyma01g26990	Gm01:35968043-35972769	byo-15-0	byo-15-14	OK	11.3102	15.0854	0.415526	-0.733869	0.463029	0.831803	no
Glyma01g27005	Glyma01g27005	Glyma01g27005	Gm01:35977333-35983210	byo-15-0	byo-15-14	OK	3.39494	0.578464	-2.55309	3.72075	0.000198632	0.00619181	yes
Glyma01g27020	Glyma01g27020	Glyma01g27020	Gm01:36004326-36005428	byo-15-0	byo-15-14	NOTEST	0	0.0693441	1.79769e+308	1.79769e+308	0.155312	1	no
Glyma01g27040	Glyma01g27040	Glyma01g27040	Gm01:36021672-36025699	byo-15-0	byo-15-14	OK	0.383077	3.35427	3.13029	-4.08585	4.39159e-05	0.0019273	yes
Glyma01g27060	Glyma01g27060	Glyma01g27060	Gm01:36063450-36065354	byo-15-0	byo-15-14	OK	3.71768	5.21636	0.488641	-0.787783	0.430824	0.811904	no
Glyma01g27110	Glyma01g27110	Glyma01g27110	Gm01:36127733-36131641	byo-15-0	byo-15-14	NOTEST	0	0	0	0	1	1	no
Glyma01g27120	Glyma01g27120	Glyma01g27120	Gm01:36147154-36151735	byo-15-0	byo-15-14	OK	3.964	2.5285	-0.648674	1.01174	0.311663	0.716455	no
Glyma01g27130	Glyma01g27130	Glyma01g27130	Gm01:36161870-36165133	byo-15-0	byo-15-14	NOTEST	0.425589	0.397072	-0.100061	0.104792	0.916541	1	no
Glyma01g27145	Glyma01g27145	Glyma01g27145	Gm01:36192774-36194659	byo-15-0	byo-15-14	NOTEST	0	0	0	0	1	1	no
Glyma01g27160	Glyma01g27160	Glyma01g27160	Gm01:36195997-36196273	byo-15-0	byo-15-14	NOTEST	0	0	0	0	1	1	no
Glyma01g27170	Glyma01g27170	Glyma01g27170	Gm01:36211478-36213198	byo-15-0	byo-15-14	OK	1.86511	4.49223	1.26817	-1.38988	0.164564	0.533184	no
Glyma01g27200	Glyma01g27200	Glyma01g27200	Gm01:36246044-36251145	byo-15-0	byo-15-14	OK	9.886	6.7491	-0.550692	0.954568	0.339796	0.741882	no
Glyma01g27215	Glyma01g27215	Glyma01g27215	Gm01:36263859-36271059	byo-15-0	byo-15-14	OK	0.583159	0	-1.79769e+308	-1.79769e+308	0.0476234	0.267086	no
Glyma01g27230	Glyma01g27230	Glyma01g27230	Gm01:36326563-36327062	byo-15-0	byo-15-14	NOTEST	0	0	0	0	1	1	no
Glyma01g27240	Glyma01g27240	Glyma01g27240	Gm01:36332421-36351694	byo-15-0	byo-15-14	OK	4.96141	4.79637	-0.0488085	0.0857538	0.931662	0.989366	no
Glyma01g27250	Glyma01g27250	Glyma01g27250	Gm01:36369066-36382267	byo-15-0	byo-15-14	OK	8.11536	8.85619	0.126031	-0.223005	0.823531	0.965617	no
Glyma01g27260	Glyma01g27260	Glyma01g27260	Gm01:36388728-36391729	byo-15-0	byo-15-14	NOTEST	0	0	0	0	1	1	no
Glyma01g27280	Glyma01g27280	Glyma01g27280	Gm01:36438459-36440199	byo-15-0	byo-15-14	OK	0.928702	1.09064	0.231889	-0.285612	0.775175	0.955139	no
Glyma01g27291	Glyma01g27291	Glyma01g27291	Gm01:36450899-36454001	byo-15-0	byo-15-14	OK	0	0.765608	1.79769e+308	1.79769e+308	0.0323106	0.210305	no
Glyma01g27301	Glyma01g27301	Glyma01g27301	Gm01:36450899-36454001	byo-15-0	byo-15-14	NOTEST	0	0	0	0	1	1	no
Glyma01g27310	Glyma01g27310	Glyma01g27310	Gm01:36464465-36465566	byo-15-0	byo-15-14	NOTEST	0	0.0121619	1.79769e+308	1.79769e+308	0.343515	1	no
Glyma01g27360	Glyma01g27360	Glyma01g27360	Gm01:36545021-36547291	byo-15-0	byo-15-14	NOTEST	0.0722794	0.332355	2.20107	-2.18994	0.0285284	1	no
Glyma01g27385	Glyma01g27385	Glyma01g27385	Gm01:36610052-36610460	byo-15-0	byo-15-14	NOTEST	0	0	0	0	1	1	no
Glyma01g27410	Glyma01g27410	Glyma01g27410	Gm01:36654803-36655111	byo-15-0	byo-15-14	NOTEST	0	0	0	0	1	1	no
Glyma01g27440	Glyma01g27440	Glyma01g27440	Gm01:36685735-36695527	byo-15-0	byo-15-14	NOTEST	0.0220941	0.0257305	0.219817	-0.106928	0.914846	1	no
Glyma01g27455	Glyma01g27455	Glyma01g27455	Gm01:36705021-36712560	byo-15-0	byo-15-14	NOTEST	0.150347	0.156236	0.0554281	-0.0598605	0.952267	1	no
Glyma01g27470	Glyma01g27470	Glyma01g27470	Gm01:36735448-36737186	byo-15-0	byo-15-14	NOTEST	0	0.021668	1.79769e+308	1.79769e+308	0.210186	1	no
Glyma01g27490	Glyma01g27490	Glyma01g27490	Gm01:36794254-36798874	byo-15-0	byo-15-14	NOTEST	0	0.120733	1.79769e+308	1.79769e+308	0.0420773	1	no
Glyma01g27710	Glyma01g27710	Glyma01g27710	Gm01:36987889-36992462	byo-15-0	byo-15-14	OK	5.8138	3.97727	-0.547703	0.940572	0.346924	0.747856	no
Glyma01g27720	Glyma01g27720	Glyma01g27720	Gm01:37036140-37038376	byo-15-0	byo-15-14	OK	0.624235	0.375411	-0.733619	0.809512	0.41822	0.802971	no
Glyma01g27765	Glyma01g27765	Glyma01g27765	Gm01:37212445-37213145	byo-15-0	byo-15-14	NOTEST	0	0	0	0	1	1	no
Glyma01g27810	Glyma01g27810	Glyma01g27810	Gm01:37231576-37233997	byo-15-0	byo-15-14	OK	5.45127	4.44073	-0.295796	0.51353	0.607581	0.904127	no
Glyma01g27840	Glyma01g27840	Glyma01g27840	Gm01:37299487-37305059	byo-15-0	byo-15-14	OK	16.017	17.8158	0.153558	-0.26787	0.7888	0.95914	no
Glyma01g27860	Glyma01g27860	Glyma01g27860	Gm01:37321469-37321784	byo-15-0	byo-15-14	NOTEST	0	0	0	0	1	1	no
Glyma01g27890	Glyma01g27890	Glyma01g27890	Gm01:37336991-37338203	byo-15-0	byo-15-14	OK	0.655756	1.00078	0.60989	-0.666767	0.504921	0.854704	no
Glyma01g27900	Glyma01g27900	Glyma01g27900	Gm01:37379998-37383931	byo-15-0	byo-15-14	OK	17.4957	18.1492	0.0529066	-0.0922592	0.926492	0.988152	no
Glyma01g27910	Glyma01g27910	Glyma01g27910	Gm01:37406845-37408224	byo-15-0	byo-15-14	NOTEST	0	0	0	0	1	1	no
Glyma01g27941	Glyma01g27941	Glyma01g27941	Gm01:37433263-37434146	byo-15-0	byo-15-14	NOTEST	0	0	0	0	1	1	no
Glyma01g27970	Glyma01g27970	Glyma01g27970	Gm01:37457417-37460795	byo-15-0	byo-15-14	NOTEST	0	0	0	0	1	1	no
Glyma01g28026	Glyma01g28026	Glyma01g28026	Gm01:37580338-37581229	byo-15-0	byo-15-14	NOTEST	0	0	0	0	1	1	no
Glyma01g28082	Glyma01g28082	Glyma01g28082	Gm01:37587054-37587942	byo-15-0	byo-15-14	NOTEST	0	0	0	0	1	1	no
Glyma01g28139	Glyma01g28139	Glyma01g28139	Gm01:37594369-37595242	byo-15-0	byo-15-14	NOTEST	0	0	0	0	1	1	no
Glyma01g28196	Glyma01g28196	Glyma01g28196	Gm01:37611247-37612183	byo-15-0	byo-15-14	NOTEST	0	0	0	0	1	1	no
Glyma01g28253	Glyma01g28253	Glyma01g28253	Gm01:37911350-37912244	byo-15-0	byo-15-14	NOTEST	0	0	0	0	1	1	no
Glyma01g28310	Glyma01g28310	Glyma01g28310	Gm01:37913283-37917411	byo-15-0	byo-15-14	OK	2.3503	5.59819	1.25212	-1.68163	0.0926415	0.396619	no
Glyma01g28353	Glyma01g28353	Glyma01g28353	Gm01:38060909-38061301	byo-15-0	byo-15-14	NOTEST	0.235371	0	-1.79769e+308	-1.79769e+308	0.191019	1	no
Glyma01g28396	Glyma01g28396	Glyma01g28396	Gm01:38199627-38200321	byo-15-0	byo-15-14	OK	440.761	146.418	-1.5899	2.56633	0.010278	0.102584	no
Glyma01g28440	Glyma01g28440	Glyma01g28440	Gm01:38205261-38207629	byo-15-0	byo-15-14	OK	1.60002	0.832859	-0.941948	1.30512	0.191851	0.574611	no
Glyma01g28460	Glyma01g28460	Glyma01g28460	Gm01:38222786-38224222	byo-15-0	byo-15-14	NOTEST	0	0	0	0	1	1	no
Glyma01g28480	Glyma01g28480	Glyma01g28480	Gm01:38248791-38250401	byo-15-0	byo-15-14	NOTEST	0	0	0	0	1	1	no
Glyma01g28491	Glyma01g28491	Glyma01g28491	Gm01:38259681-38270227	byo-15-0	byo-15-14	NOTEST	0	0	0	0	1	1	no
Glyma01g28500	Glyma01g28500	Glyma01g28500	Gm01:38308110-38309077	byo-15-0	byo-15-14	OK	103.541	74.6797	-0.471417	0.79209	0.428308	0.80981	no
Glyma01g28511	Glyma01g28511	Glyma01g28511	Gm01:38309608-38311167	byo-15-0	byo-15-14	NOTEST	0.0538741	0.022101	-1.28548	0.601481	0.54752	1	no
Glyma01g28520	Glyma01g28520	Glyma01g28520	Gm01:38386523-38391051	byo-15-0	byo-15-14	OK	10.764	1.10601	-3.28278	3.98084	6.86724e-05	0.00272581	yes
Glyma01g28550	Glyma01g28550	Glyma01g28550	Gm01:38422858-38424428	byo-15-0	byo-15-14	NOTEST	0	0	0	0	1	1	no
Glyma01g28626	Glyma01g28626	Glyma01g28626	Gm01:38529390-38530425	byo-15-0	byo-15-14	NOTEST	0	0	0	0	1	1	no
Glyma01g28703	Glyma01g28703	Glyma01g28703	Gm01:38575000-38577422	byo-15-0	byo-15-14	OK	0.638826	1.58129	1.30761	-1.34783	0.177713	0.554665	no
Glyma01g28780	Glyma01g28780	Glyma01g28780	Gm01:38596171-38598279	byo-15-0	byo-15-14	NOTEST	0.192241	0.159079	-0.273168	0.264242	0.791593	1	no
Glyma01g28800	Glyma01g28800	Glyma01g28800	Gm01:38660680-38662575	byo-15-0	byo-15-14	NOTEST	0	0	0	0	1	1	no
Glyma01g28805	Glyma01g28805	Glyma01g28805	Gm01:38690273-38690984	byo-15-0	byo-15-14	NOTEST	0	0	0	0	1	1	no
Glyma01g28810	Glyma01g28810	Glyma01g28810	Gm01:38692764-38695649	byo-15-0	byo-15-14	OK	1502.25	755.781	-0.991082	0.817227	0.413798	0.798946	no
Glyma01g28820	Glyma01g28820	Glyma01g28820	Gm01:38703774-38707276	byo-15-0	byo-15-14	OK	59.0636	34.8062	-0.762925	1.12048	0.262509	0.66371	no
Glyma01g28830	Glyma01g28830	Glyma01g28830	Gm01:38709310-38713735	byo-15-0	byo-15-14	OK	21.3247	12.2159	-0.803765	1.42309	0.154709	0.516197	no
Glyma01g28841	Glyma01g28841	Glyma01g28841	Gm01:38749817-38751606	byo-15-0	byo-15-14	NOTEST	0	0	0	0	1	1	no
Glyma01g28850	Glyma01g28850	Glyma01g28850	Gm01:38758937-38772979	byo-15-0	byo-15-14	NOTEST	0	0	0	0	1	1	no
Glyma01g28865	Glyma01g28865	Glyma01g28865	Gm01:38774846-38778332	byo-15-0	byo-15-14	NOTEST	0.288454	0	-1.79769e+308	-1.79769e+308	0.0224927	1	no
Glyma01g28880	Glyma01g28880	Glyma01g28880	Gm01:38811474-38819368	byo-15-0	byo-15-14	NOTEST	0	0	0	0	1	1	no
Glyma01g28890	Glyma01g28890	Glyma01g28890	Gm01:38825959-38830479	byo-15-0	byo-15-14	NOTEST	0	0	0	0	1	1	no
Glyma01g28936	Glyma01g28936	Glyma01g28936	Gm01:38986023-38989868	byo-15-0	byo-15-14	OK	1.1915	0.388477	-1.61688	2.15583	0.0310969	0.205544	no
Glyma01g28983	Glyma01g28983	Glyma01g28983	Gm01:39101552-39101978	byo-15-0	byo-15-14	NOTEST	0	0	0	0	1	1	no
Glyma01g29030	Glyma01g29030	Glyma01g29030	Gm01:39117816-39121119	byo-15-0	byo-15-14	NOTEST	0.0448374	0.0402078	-0.157228	0.116422	0.907318	1	no
Glyma01g29070	Glyma01g29070	Glyma01g29070	Gm01:39200746-39201279	byo-15-0	byo-15-14	NOTEST	0	0	0	0	1	1	no
Glyma01g29091	Glyma01g29091	Glyma01g29091	Gm01:39202322-39203074	byo-15-0	byo-15-14	NOTEST	0	0	0	0	1	1	no
Glyma01g29110	Glyma01g29110	Glyma01g29110	Gm01:39206637-39207905	byo-15-0	byo-15-14	NOTEST	0	0	0	0	1	1	no
Glyma01g29131	Glyma01g29131	Glyma01g29131	Gm01:39211228-39211501	byo-15-0	byo-15-14	NOTEST	0	0	0	0	1	1	no
Glyma01g29150	Glyma01g29150	Glyma01g29150	Gm01:39249319-39254445	byo-15-0	byo-15-14	OK	1.53886	3.67221	1.25479	-2.01023	0.0444069	0.25726	no
Glyma01g29171	Glyma01g29171	Glyma01g29171	Gm01:39255360-39265417	byo-15-0	byo-15-14	OK	0.934883	0.622233	-0.587332	0.666468	0.505112	0.854769	no
Glyma01g29190	Glyma01g29190	Glyma01g29190	Gm01:39285279-39288819	byo-15-0	byo-15-14	NOTEST	0	0	0	0	1	1	no
Glyma01g29220	Glyma01g29220	Glyma01g29220	Gm01:39316166-39317298	byo-15-0	byo-15-14	NOTEST	0	0	0	0	1	1	no
Glyma01g29230	Glyma01g29230	Glyma01g29230	Gm01:39317900-39318629	byo-15-0	byo-15-14	NOTEST	0	0	0	0	1	1	no
Glyma01g29255	Glyma01g29255	Glyma01g29255	Gm01:39318953-39319509	byo-15-0	byo-15-14	NOTEST	0	0	0	0	1	1	no
Glyma01g29280	Glyma01g29280	Glyma01g29280	Gm01:39350672-39358098	byo-15-0	byo-15-14	OK	3.01784	3.56079	0.238685	-0.371257	0.710446	0.93746	no
Glyma01g29305	Glyma01g29305	Glyma01g29305	Gm01:39376341-39388072	byo-15-0	byo-15-14	OK	2.28331	1.90598	-0.260591	0.34767	0.728088	0.942539	no
Glyma01g29330	Glyma01g29330	Glyma01g29330	Gm01:39403861-39412277	byo-15-0	byo-15-14	OK	4.09404	4.14012	0.0161471	-0.0267999	0.978619	0.99637	no
Glyma01g29346	Glyma01g29346	Glyma01g29346	Gm01:39421332-39429591	byo-15-0	byo-15-14	OK	2.35321	1.81186	-0.377161	0.50609	0.612793	0.906211	no
Glyma01g29362	Glyma01g29362	Glyma01g29362	Gm01:39443729-39458833	byo-15-0	byo-15-14	OK	1.8364	3.14558	0.776443	-1.18061	0.237759	0.634885	no
Glyma01g29378	Glyma01g29378	Glyma01g29378	Gm01:39478263-39516299	byo-15-0	byo-15-14	OK	1.71052	2.62299	0.616777	-0.991965	0.321214	0.725612	no
Glyma01g29394	Glyma01g29394	Glyma01g29394	Gm01:39526777-39530894	byo-15-0	byo-15-14	NOTEST	0	0	0	0	1	1	no
Glyma01g29410	Glyma01g29410	Glyma01g29410	Gm01:39591646-39594997	byo-15-0	byo-15-14	OK	0.748935	1.17467	0.649342	-0.797233	0.425316	0.80805	no
Glyma01g29420	Glyma01g29420	Glyma01g29420	Gm01:39597740-39602942	byo-15-0	byo-15-14	OK	14.1859	16.6121	0.227774	-0.403549	0.686544	0.930259	no
Glyma01g29440	Glyma01g29440	Glyma01g29440	Gm01:39655886-39656000	byo-15-0	byo-15-14	NOTEST	0	0	0	0	1	1	no
Glyma01g29470	Glyma01g29470	Glyma01g29470	Gm01:39787035-39797571	byo-15-0	byo-15-14	OK	3.45215	5.39314	0.643629	-1.12965	0.258624	0.659811	no
Glyma01g29480	Glyma01g29480	Glyma01g29480	Gm01:39799515-39801235	byo-15-0	byo-15-14	NOTEST	0	0	0	0	1	1	no
Glyma01g29495	Glyma01g29495	Glyma01g29495	Gm01:39818462-39819244	byo-15-0	byo-15-14	NOTEST	0.122442	0.109765	-0.157685	0.0647559	0.948368	1	no
Glyma01g29511	Glyma01g29511	Glyma01g29511	Gm01:39824538-39825839	byo-15-0	byo-15-14	NOTEST	0	0	0	0	1	1	no
Glyma01g29525	Glyma01g29525	Glyma01g29525	Gm01:39837032-39837374	byo-15-0	byo-15-14	NOTEST	0	0	0	0	1	1	no
Glyma01g29540	Glyma01g29540	Glyma01g29540	Gm01:39848379-39851083	byo-15-0	byo-15-14	OK	28.5794	25.5898	-0.159408	0.27771	0.781235	0.956983	no
Glyma01g29570	Glyma01g29570	Glyma01g29570	Gm01:39879227-39883100	byo-15-0	byo-15-14	NOTEST	0.113914	0.0138592	-3.03903	1.86035	0.0628364	1	no
Glyma01g29580	Glyma01g29580	Glyma01g29580	Gm01:39898856-39902291	byo-15-0	byo-15-14	NOTEST	0.0746197	0	-1.79769e+308	-1.79769e+308	0.0382133	1	no
Glyma01g29600	Glyma01g29600	Glyma01g29600	Gm01:39918097-39921140	byo-15-0	byo-15-14	NOTEST	0	0	0	0	1	1	no
Glyma01g29615	Glyma01g29615	Glyma01g29615	Gm01:39935345-39939812	byo-15-0	byo-15-14	NOTEST	0.0966191	0.00918615	-3.39478	1.74852	0.0803744	1	no
Glyma01g29630	Glyma01g29630	Glyma01g29630	Gm01:39945735-39949387	byo-15-0	byo-15-14	OK	33.745	30.6463	-0.13896	0.212649	0.831601	0.96703	no
Glyma01g29643	Glyma01g29643	Glyma01g29643	Gm01:39958765-39959672	byo-15-0	byo-15-14	NOTEST	0	0	0	0	1	1	no
Glyma01g29656	Glyma01g29656	Glyma01g29656	Gm01:39965927-39966511	byo-15-0	byo-15-14	NOTEST	0	0	0	0	1	1	no
Glyma01g29670	Glyma01g29670	Glyma01g29670	Gm01:39988960-39991138	byo-15-0	byo-15-14	OK	0.153987	0.949605	2.62452	-2.70128	0.00690736	0.0788286	no
Glyma01g29715	Glyma01g29715	Glyma01g29715	Gm01:40029815-40030406	byo-15-0	byo-15-14	NOTEST	0	0	0	0	1	1	no
Glyma01g29760	Glyma01g29760	Glyma01g29760	Gm01:40077200-40079998	byo-15-0	byo-15-14	NOTEST	0.0500161	0.346442	2.79215	-1.60757	0.107929	1	no
Glyma01g29816	Glyma01g29816	Glyma01g29816	Gm01:40154962-40155672	byo-15-0	byo-15-14	NOTEST	0	0.0600364	1.79769e+308	1.79769e+308	0.269138	1	no
Glyma01g29873	Glyma01g29873	Glyma01g29873	Gm01:40234344-40236298	byo-15-0	byo-15-14	NOTEST	0	0	0	0	1	1	no
Glyma01g29930	Glyma01g29930	Glyma01g29930	Gm01:40499102-40503250	byo-15-0	byo-15-14	OK	3.24265	9.49508	1.55001	-2.3337	0.0196117	0.154251	no
Glyma01g29950	Glyma01g29950	Glyma01g29950	Gm01:40560867-40564466	byo-15-0	byo-15-14	OK	8.15444	8.32729	0.0302602	-0.0526072	0.958045	0.993815	no
Glyma01g29970	Glyma01g29970	Glyma01g29970	Gm01:40574051-40575558	byo-15-0	byo-15-14	NOTEST	0	0	0	0	1	1	no
Glyma01g30000	Glyma01g30000	Glyma01g30000	Gm01:40668497-40669995	byo-15-0	byo-15-14	NOTEST	0	0	0	0	1	1	no
Glyma01g30010	Glyma01g30010	Glyma01g30010	Gm01:40681967-40683465	byo-15-0	byo-15-14	NOTEST	0	0	0	0	1	1	no
Glyma01g30020	Glyma01g30020	Glyma01g30020	Gm01:40733504-40735002	byo-15-0	byo-15-14	NOTEST	0	0	0	0	1	1	no
Glyma01g30030	Glyma01g30030	Glyma01g30030	Gm01:40745198-40746696	byo-15-0	byo-15-14	NOTEST	0	0	0	0	1	1	no
Glyma01g30040	Glyma01g30040	Glyma01g30040	Gm01:40756924-40758421	byo-15-0	byo-15-14	NOTEST	0	0	0	0	1	1	no
Glyma01g30060	Glyma01g30060	Glyma01g30060	Gm01:40769686-40771162	byo-15-0	byo-15-14	NOTEST	0	0	0	0	1	1	no
Glyma01g30080	Glyma01g30080	Glyma01g30080	Gm01:40777029-40778052	byo-15-0	byo-15-14	NOTEST	0	0	0	0	1	1	no
Glyma01g30300	Glyma01g30300	Glyma01g30300	Gm01:40952282-40957143	byo-15-0	byo-15-14	OK	2.20223	3.28365	0.576338	-0.877919	0.379988	0.774736	no
Glyma01g30320	Glyma01g30320	Glyma01g30320	Gm01:40964890-40985483	byo-15-0	byo-15-14	OK	5.67776	5.72144	0.0110577	-0.019051	0.9848	0.997852	no
Glyma01g30335	Glyma01g30335	Glyma01g30335	Gm01:40964890-40985483	byo-15-0	byo-15-14	OK	0.672293	0.553275	-0.281093	0.111838	0.910952	0.984694	no
Glyma01g30350	Glyma01g30350	Glyma01g30350	Gm01:41014087-41016040	byo-15-0	byo-15-14	OK	38.296	42.3494	0.14515	-0.247847	0.804253	0.961998	no
Glyma01g30370	Glyma01g30370	Glyma01g30370	Gm01:41043490-41043758	byo-15-0	byo-15-14	NOTEST	0	0	0	0	1	1	no
Glyma01g30390	Glyma01g30390	Glyma01g30390	Gm01:41062775-41066889	byo-15-0	byo-15-14	OK	3.71507	2.30271	-0.690052	1.03259	0.301796	0.70624	no
Glyma01g30400	Glyma01g30400	Glyma01g30400	Gm01:41067190-41075707	byo-15-0	byo-15-14	OK	9.05282	10.4776	0.210867	-0.37445	0.70807	0.936554	no
Glyma01g30431	Glyma01g30431	Glyma01g30431	Gm01:41163921-41165539	byo-15-0	byo-15-14	NOTEST	0	0	0	0	1	1	no
Glyma01g30460	Glyma01g30460	Glyma01g30460	Gm01:41170972-41176563	byo-15-0	byo-15-14	NOTEST	0	0	0	0	1	1	no
Glyma01g30485	Glyma01g30485	Glyma01g30485	Gm01:41170972-41176563	byo-15-0	byo-15-14	NOTEST	0	0.0292188	1.79769e+308	1.79769e+308	0.179254	1	no
Glyma01g30511	Glyma01g30511	Glyma01g30511	Gm01:41210645-41210897	byo-15-0	byo-15-14	NOTEST	0	0	0	0	1	1	no
Glyma01g30535	Glyma01g30535	Glyma01g30535	Gm01:41215563-41218988	byo-15-0	byo-15-14	NOTEST	0	0	0	0	1	1	no
Glyma01g30560	Glyma01g30560	Glyma01g30560	Gm01:41232630-41234794	byo-15-0	byo-15-14	NOTEST	0	0	0	0	1	1	no
Glyma01g30610	Glyma01g30610	Glyma01g30610	Gm01:41406971-41411553	byo-15-0	byo-15-14	NOTEST	0	0	0	0	1	1	no
Glyma01g30626	Glyma01g30626	Glyma01g30626	Gm01:41440314-41440973	byo-15-0	byo-15-14	NOTEST	0	0	0	0	1	1	no
Glyma01g30643	Glyma01g30643	Glyma01g30643	Gm01:41457347-41461938	byo-15-0	byo-15-14	NOTEST	0	0	0	0	1	1	no
Glyma01g30660	Glyma01g30660	Glyma01g30660	Gm01:41493462-41493999	byo-15-0	byo-15-14	NOTEST	0	0	0	0	1	1	no
Glyma01g30670	Glyma01g30670	Glyma01g30670	Gm01:41495108-41496829	byo-15-0	byo-15-14	NOTEST	0	0.0355965	1.79769e+308	1.79769e+308	0.210186	1	no
Glyma01g30900	Glyma01g30900	Glyma01g30900	Gm01:41673575-41673782	byo-15-0	byo-15-14	NOTEST	0	0	0	0	1	1	no
Glyma01g30910	Glyma01g30910	Glyma01g30910	Gm01:41681659-41690953	byo-15-0	byo-15-14	OK	13.5555	14.3227	0.0794271	-0.140599	0.888187	0.98075	no
Glyma01g30920	Glyma01g30920	Glyma01g30920	Gm01:41691541-41699290	byo-15-0	byo-15-14	NOTEST	0.0355562	0.15309	2.10621	-1.5229	0.127783	1	no
Glyma01g30982	Glyma01g30982	Glyma01g30982	Gm01:41712879-41714252	byo-15-0	byo-15-14	OK	0.81388	1.06328	0.385638	-0.436934	0.662159	0.924221	no
Glyma01g31044	Glyma01g31044	Glyma01g31044	Gm01:41890431-41892644	byo-15-0	byo-15-14	OK	1.82614	1.50457	-0.279444	0.373239	0.708971	0.936855	no
Glyma01g31107	Glyma01g31107	Glyma01g31107	Gm01:41928201-41933073	byo-15-0	byo-15-14	NOTEST	0	0.0685408	1.79769e+308	1.79769e+308	0.127239	1	no
Glyma01g31170	Glyma01g31170	Glyma01g31170	Gm01:41986790-41991338	byo-15-0	byo-15-14	OK	2.80872	2.7977	-0.00567154	0.00957018	0.992364	0.998976	no
Glyma01g31180	Glyma01g31180	Glyma01g31180	Gm01:41992765-41993572	byo-15-0	byo-15-14	OK	0.13709	1.3891	3.34095	-2.52099	0.0117026	0.11132	no
Glyma01g31230	Glyma01g31230	Glyma01g31230	Gm01:42040491-42046500	byo-15-0	byo-15-14	NOTEST	0	0	0	0	1	1	no
Glyma01g31260	Glyma01g31260	Glyma01g31260	Gm01:42062020-42069161	byo-15-0	byo-15-14	OK	4.86059	5.07422	0.0620561	-0.101804	0.918913	0.986438	no
Glyma01g31270	Glyma01g31270	Glyma01g31270	Gm01:42071523-42074445	byo-15-0	byo-15-14	OK	11.5224	21.0206	0.867361	-1.52681	0.126808	0.46581	no
Glyma01g31275	Glyma01g31275	Glyma01g31275	Gm01:42077853-42078844	byo-15-0	byo-15-14	NOTEST	0	0	0	0	1	1	no
Glyma01g31280	Glyma01g31280	Glyma01g31280	Gm01:42077853-42078844	byo-15-0	byo-15-14	NOTEST	0	0	0	0	1	1	no
Glyma01g31300	Glyma01g31300	Glyma01g31300	Gm01:42124055-42127597	byo-15-0	byo-15-14	OK	127.279	8.99687	-3.82242	6.15413	7.54908e-10	1.84916e-07	yes
Glyma01g31311	Glyma01g31311	Glyma01g31311	Gm01:42143417-42149831	byo-15-0	byo-15-14	OK	8.78791	6.31627	-0.476447	0.768956	0.441919	0.818815	no
Glyma01g31320	Glyma01g31320	Glyma01g31320	Gm01:42162374-42164312	byo-15-0	byo-15-14	OK	5.78932	8.23653	0.508642	-0.869461	0.384595	0.777787	no
Glyma01g31341	Glyma01g31341	Glyma01g31341	Gm01:42226588-42230852	byo-15-0	byo-15-14	NOTEST	0.0527478	0.0216433	-1.28519	0.601343	0.547611	1	no
Glyma01g31360	Glyma01g31360	Glyma01g31360	Gm01:42232501-42236451	byo-15-0	byo-15-14	OK	22.783	21.2495	-0.100532	0.167751	0.866779	0.975562	no
Glyma01g31370	Glyma01g31370	Glyma01g31370	Gm01:42261741-42265856	byo-15-0	byo-15-14	OK	0.317845	0.455447	0.518959	-0.57471	0.565487	0.886738	no
Glyma01g31425	Glyma01g31425	Glyma01g31425	Gm01:42373253-42374275	byo-15-0	byo-15-14	OK	3.33742	2.05112	-0.702316	0.736261	0.461572	0.831326	no
Glyma01g31480	Glyma01g31480	Glyma01g31480	Gm01:42378220-42384123	byo-15-0	byo-15-14	OK	0.32047	0.901599	1.4923	-1.91504	0.055487	0.292254	no
Glyma01g31520	Glyma01g31520	Glyma01g31520	Gm01:42469464-42474210	byo-15-0	byo-15-14	NOTEST	0	0	0	0	1	1	no
Glyma01g31550	Glyma01g31550	Glyma01g31550	Gm01:42548413-42558287	byo-15-0	byo-15-14	NOTEST	0	0	0	0	1	1	no
Glyma01g31570	Glyma01g31570	Glyma01g31570	Gm01:42586307-42593931	byo-15-0	byo-15-14	OK	5.63116	4.83755	-0.219155	0.371594	0.710195	0.937434	no
Glyma01g31581	Glyma01g31581	Glyma01g31581	Gm01:42597638-42599280	byo-15-0	byo-15-14	NOTEST	0	0	0	0	1	1	no
Glyma01g31590	Glyma01g31590	Glyma01g31590	Gm01:42607296-42611243	byo-15-0	byo-15-14	NOTEST	0.207135	0.121894	-0.76495	0.798356	0.424664	1	no
Glyma01g31600	Glyma01g31600	Glyma01g31600	Gm01:42628300-42629673	byo-15-0	byo-15-14	OK	44.6113	39.3445	-0.181248	0.307554	0.758421	0.950536	no
Glyma01g31610	Glyma01g31610	Glyma01g31610	Gm01:42631340-42634983	byo-15-0	byo-15-14	OK	20.1534	24.1606	0.261637	-0.459765	0.645685	0.919026	no
Glyma01g31630	Glyma01g31630	Glyma01g31630	Gm01:42661065-42664809	byo-15-0	byo-15-14	OK	0.340268	1.63856	2.26768	-2.11636	0.0343143	0.218596	no
Glyma01g31636	Glyma01g31636	Glyma01g31636	Gm01:42667422-42670895	byo-15-0	byo-15-14	NOTEST	0	0	0	0	1	1	no
Glyma01g31643	Glyma01g31643	Glyma01g31643	Gm01:42681129-42683618	byo-15-0	byo-15-14	NOTEST	0	0	0	0	1	1	no
Glyma01g31650	Glyma01g31650	Glyma01g31650	Gm01:42697267-42701819	byo-15-0	byo-15-14	NOTEST	0	0	0	0	1	1	no
Glyma01g31660	Glyma01g31660	Glyma01g31660	Gm01:42724418-42726114	byo-15-0	byo-15-14	NOTEST	0.322168	0	-1.79769e+308	-1.79769e+308	0.0273427	1	no
Glyma01g31670	Glyma01g31670	Glyma01g31670	Gm01:42752424-42753269	byo-15-0	byo-15-14	NOTEST	0	0	0	0	1	1	no
Glyma01g31691	Glyma01g31691	Glyma01g31691	Gm01:42756407-42766923	byo-15-0	byo-15-14	NOTEST	0	0	0	0	1	1	no
Glyma01g31711	Glyma01g31711	Glyma01g31711	Gm01:42786261-42789612	byo-15-0	byo-15-14	NOTEST	0	0	0	0	1	1	no
Glyma01g31730	Glyma01g31730	Glyma01g31730	Gm01:42867418-42868294	byo-15-0	byo-15-14	NOTEST	0.204031	0.0529762	-1.94538	0.63544	0.525141	1	no
Glyma01g31750	Glyma01g31750	Glyma01g31750	Gm01:42942064-42943179	byo-15-0	byo-15-14	OK	25.2923	7.61112	-1.73252	2.96903	0.00298746	0.0444475	yes
Glyma01g31760	Glyma01g31760	Glyma01g31760	Gm01:42947350-42947710	byo-15-0	byo-15-14	NOTEST	0	0	0	0	1	1	no
Glyma01g31780	Glyma01g31780	Glyma01g31780	Gm01:42956928-42957282	byo-15-0	byo-15-14	NOTEST	0	0	0	0	1	1	no
Glyma01g31801	Glyma01g31801	Glyma01g31801	Gm01:43007888-43008997	byo-15-0	byo-15-14	NOTEST	0	0	0	0	1	1	no
Glyma01g31820	Glyma01g31820	Glyma01g31820	Gm01:43013160-43013421	byo-15-0	byo-15-14	NOTEST	0	0	0	0	1	1	no
Glyma01g31830	Glyma01g31830	Glyma01g31830	Gm01:43025615-43026886	byo-15-0	byo-15-14	OK	9.24523	4.91625	-0.911151	1.49324	0.135374	0.48225	no
Glyma01g31840	Glyma01g31840	Glyma01g31840	Gm01:43069330-43072880	byo-15-0	byo-15-14	OK	0.67391	1.40376	1.05867	-1.47866	0.139232	0.488635	no
Glyma01g31850	Glyma01g31850	Glyma01g31850	Gm01:43076459-43079732	byo-15-0	byo-15-14	NOTEST	0	0	0	0	1	1	no
Glyma01g31860	Glyma01g31860	Glyma01g31860	Gm01:43090292-43094391	byo-15-0	byo-15-14	NOTEST	0	0	0	0	1	1	no
Glyma01g31890	Glyma01g31890	Glyma01g31890	Gm01:43130697-43137550	byo-15-0	byo-15-14	OK	0.792082	0.793916	0.00333635	-0.0036242	0.997108	0.999515	no
Glyma01g31900	Glyma01g31900	Glyma01g31900	Gm01:43140964-43144007	byo-15-0	byo-15-14	NOTEST	0	0.26723	1.79769e+308	1.79769e+308	0.022106	1	no
Glyma01g31910	Glyma01g31910	Glyma01g31910	Gm01:43154205-43156585	byo-15-0	byo-15-14	NOTEST	0	0	0	0	1	1	no
Glyma01g31921	Glyma01g31921	Glyma01g31921	Gm01:43157131-43160950	byo-15-0	byo-15-14	OK	0.720109	0.0569186	-3.66124	2.79578	0.00517743	0.0645693	no
Glyma01g31930	Glyma01g31930	Glyma01g31930	Gm01:43173872-43179341	byo-15-0	byo-15-14	OK	1.32772	0.61492	-1.11048	1.55286	0.120457	0.453383	no
Glyma01g31940	Glyma01g31940	Glyma01g31940	Gm01:43217711-43224924	byo-15-0	byo-15-14	NOTEST	0.158901	0.176378	0.150541	-0.12209	0.902827	1	no
Glyma01g31961	Glyma01g31961	Glyma01g31961	Gm01:43241123-43245445	byo-15-0	byo-15-14	NOTEST	0	0	0	0	1	1	no
Glyma01g31980	Glyma01g31980	Glyma01g31980	Gm01:43250905-43255641	byo-15-0	byo-15-14	NOTEST	0	0.117132	1.79769e+308	1.79769e+308	0.364276	1	no
Glyma01g31990	Glyma01g31990	Glyma01g31990	Gm01:43250905-43255641	byo-15-0	byo-15-14	OK	6.17817	6.11074	-0.0158335	0.0251085	0.979968	0.996702	no
Glyma01g32000	Glyma01g32000	Glyma01g32000	Gm01:43264508-43272659	byo-15-0	byo-15-14	OK	3.62849	5.13375	0.500647	-0.885602	0.375832	0.771218	no
Glyma01g32010	Glyma01g32010	Glyma01g32010	Gm01:43337913-43338530	byo-15-0	byo-15-14	NOTEST	0	0	0	0	1	1	no
Glyma01g32020	Glyma01g32020	Glyma01g32020	Gm01:43341907-43343025	byo-15-0	byo-15-14	NOTEST	0	0	0	0	1	1	no
Glyma01g32031	Glyma01g32031	Glyma01g32031	Gm01:43354010-43355755	byo-15-0	byo-15-14	NOTEST	0	0	0	0	1	1	no
Glyma01g32040	Glyma01g32040	Glyma01g32040	Gm01:43398690-43400994	byo-15-0	byo-15-14	NOTEST	0	0	0	0	1	1	no
Glyma01g32070	Glyma01g32070	Glyma01g32070	Gm01:43424973-43427243	byo-15-0	byo-15-14	NOTEST	0	0	0	0	1	1	no
Glyma01g32081	Glyma01g32081	Glyma01g32081	Gm01:43450179-43450730	byo-15-0	byo-15-14	NOTEST	0	0	0	0	1	1	no
Glyma01g32090	Glyma01g32090	Glyma01g32090	Gm01:43463846-43470841	byo-15-0	byo-15-14	OK	2.30656	1.84005	-0.325995	0.4921	0.622648	0.910139	no
Glyma01g32103	Glyma01g32103	Glyma01g32103	Gm01:43463846-43470841	byo-15-0	byo-15-14	NOTEST	0.177949	0.204454	0.200314	-0.0420496	0.966459	1	no
Glyma01g32116	Glyma01g32116	Glyma01g32116	Gm01:43502972-43506823	byo-15-0	byo-15-14	NOTEST	0.146588	0.096804	-0.598631	0.513164	0.607837	1	no
Glyma01g32130	Glyma01g32130	Glyma01g32130	Gm01:43553617-43555903	byo-15-0	byo-15-14	OK	0	0.45505	1.79769e+308	1.79769e+308	0.0281448	0.193742	no
Glyma01g32140	Glyma01g32140	Glyma01g32140	Gm01:43570735-43574743	byo-15-0	byo-15-14	OK	0	2.87489	1.79769e+308	1.79769e+308	0.00362423	0.0507048	no
Glyma01g32160	Glyma01g32160	Glyma01g32160	Gm01:43604977-43607065	byo-15-0	byo-15-14	NOTEST	0	0	0	0	1	1	no
Glyma01g32190	Glyma01g32190	Glyma01g32190	Gm01:43621003-43623360	byo-15-0	byo-15-14	NOTEST	0	0	0	0	1	1	no
Glyma01g32211	Glyma01g32211	Glyma01g32211	Gm01:43638172-43638537	byo-15-0	byo-15-14	NOTEST	0	0	0	0	1	1	no
Glyma01g32230	Glyma01g32230	Glyma01g32230	Gm01:43687454-43687922	byo-15-0	byo-15-14	NOTEST	0	0	0	0	1	1	no
Glyma01g32270	Glyma01g32270	Glyma01g32270	Gm01:43720350-43722510	byo-15-0	byo-15-14	NOTEST	0	0.0584978	1.79769e+308	1.79769e+308	0.127239	1	no
Glyma01g32291	Glyma01g32291	Glyma01g32291	Gm01:43773470-43774094	byo-15-0	byo-15-14	OK	1.9396	0.162704	-3.57543	1.85738	0.0632566	0.316661	no
Glyma01g32310	Glyma01g32310	Glyma01g32310	Gm01:43784204-43786716	byo-15-0	byo-15-14	NOTEST	0	0	0	0	1	1	no
Glyma01g32340	Glyma01g32340	Glyma01g32340	Gm01:43819827-43820154	byo-15-0	byo-15-14	NOTEST	0	0	0	0	1	1	no
Glyma01g32360	Glyma01g32360	Glyma01g32360	Gm01:43828911-43832736	byo-15-0	byo-15-14	NOTEST	0	0	0	0	1	1	no
Glyma01g32370	Glyma01g32370	Glyma01g32370	Gm01:43834206-43835697	byo-15-0	byo-15-14	OK	2.84725	0.64068	-2.15189	2.68923	0.0071618	0.0806715	no
Glyma01g32380	Glyma01g32380	Glyma01g32380	Gm01:43870379-43873398	byo-15-0	byo-15-14	OK	1.09984	1.06284	-0.0493698	0.0691701	0.944854	0.99165	no
Glyma01g32390	Glyma01g32390	Glyma01g32390	Gm01:43912452-43917776	byo-15-0	byo-15-14	NOTEST	0.399222	0	-1.79769e+308	-1.79769e+308	0.0383603	1	no
Glyma01g32400	Glyma01g32400	Glyma01g32400	Gm01:43922908-43926832	byo-15-0	byo-15-14	OK	7.69982	1.90778	-2.01293	3.3274	0.000876606	0.0181415	yes
Glyma01g32415	Glyma01g32415	Glyma01g32415	Gm01:43929164-43930175	byo-15-0	byo-15-14	NOTEST	0	0	0	0	1	1	no
Glyma01g32430	Glyma01g32430	Glyma01g32430	Gm01:43974483-43977133	byo-15-0	byo-15-14	OK	0.161731	0.753145	2.21933	-2.59372	0.00949435	0.0971436	no
Glyma01g32440	Glyma01g32440	Glyma01g32440	Gm01:43989758-43991730	byo-15-0	byo-15-14	OK	2.57005	1.87439	-0.455372	0.691686	0.489135	0.846763	no
Glyma01g32450	Glyma01g32450	Glyma01g32450	Gm01:44035709-44042969	byo-15-0	byo-15-14	OK	49.4579	11.1665	-2.14702	3.45832	0.000543548	0.0129065	yes
Glyma01g32460	Glyma01g32460	Glyma01g32460	Gm01:44035709-44042969	byo-15-0	byo-15-14	LOWDATA	0	0	-2.14702	0	1	1	no
Glyma01g32480	Glyma01g32480	Glyma01g32480	Gm01:44085644-44091881	byo-15-0	byo-15-14	NOTEST	0	0.0229791	1.79769e+308	1.79769e+308	0.210186	1	no
Glyma01g32680	Glyma01g32680	Glyma01g32680	Gm01:44207946-44213690	byo-15-0	byo-15-14	OK	4.01381	0.9822	-2.03089	2.81971	0.00480667	0.0616792	no
Glyma01g32690	Glyma01g32690	Glyma01g32690	Gm01:44229408-44236211	byo-15-0	byo-15-14	OK	7.79401	5.38554	-0.533276	0.943028	0.345667	0.747302	no
Glyma01g32750	Glyma01g32750	Glyma01g32750	Gm01:44319318-44320867	byo-15-0	byo-15-14	OK	1845.96	2488.38	0.43083	-0.388387	0.697729	0.933264	no
Glyma01g32760	Glyma01g32760	Glyma01g32760	Gm01:44347887-44349526	byo-15-0	byo-15-14	OK	0	0.669321	1.79769e+308	1.79769e+308	0.0192327	0.152152	no
Glyma01g32775	Glyma01g32775	Glyma01g32775	Gm01:44353224-44356977	byo-15-0	byo-15-14	NOTEST	0.0450011	0	-1.79769e+308	-1.79769e+308	0.108187	1	no
Glyma01g32790	Glyma01g32790	Glyma01g32790	Gm01:44365503-44368345	byo-15-0	byo-15-14	OK	2.55434	3.1724	0.312625	-0.489386	0.624568	0.910877	no
Glyma01g32800	Glyma01g32800	Glyma01g32800	Gm01:44381434-44383734	byo-15-0	byo-15-14	OK	0.478033	0.254446	-0.909749	0.895452	0.370546	0.767307	no
Glyma01g32810	Glyma01g32810	Glyma01g32810	Gm01:44384412-44392444	byo-15-0	byo-15-14	OK	0.444558	0.380675	-0.223809	0.285822	0.775015	0.955107	no
Glyma01g32825	Glyma01g32825	Glyma01g32825	Gm01:44418267-44430426	byo-15-0	byo-15-14	NOTEST	0.15074	0.021195	-2.83027	1.44477	0.148523	1	no
Glyma01g32841	Glyma01g32841	Glyma01g32841	Gm01:44482207-44482737	byo-15-0	byo-15-14	NOTEST	0	0.0861997	1.79769e+308	1.79769e+308	0.210186	1	no
Glyma01g32855	Glyma01g32855	Glyma01g32855	Gm01:44489898-44494310	byo-15-0	byo-15-14	NOTEST	0.0239682	0.389406	4.02208	-2.32973	0.0198202	1	no
Glyma01g32870	Glyma01g32870	Glyma01g32870	Gm01:44497093-44498739	byo-15-0	byo-15-14	OK	27.031	18.1645	-0.573491	0.979837	0.327167	0.729971	no
Glyma01g32881	Glyma01g32881	Glyma01g32881	Gm01:44501342-44502103	byo-15-0	byo-15-14	OK	2.24251	0.204313	-3.45626	2.90486	0.00367422	0.0510951	no
Glyma01g32890	Glyma01g32890	Glyma01g32890	Gm01:44504750-44507253	byo-15-0	byo-15-14	OK	2.24904	0.51442	-2.12829	2.26637	0.0234287	0.172457	no
Glyma01g32900	Glyma01g32900	Glyma01g32900	Gm01:44534734-44540055	byo-15-0	byo-15-14	NOTEST	0	0	0	0	1	1	no
Glyma01g32920	Glyma01g32920	Glyma01g32920	Gm01:44562541-44564228	byo-15-0	byo-15-14	NOTEST	0.0887538	0.137858	0.635306	-0.431888	0.665823	1	no
Glyma01g32940	Glyma01g32940	Glyma01g32940	Gm01:44595567-44597755	byo-15-0	byo-15-14	NOTEST	0	0	0	0	1	1	no
Glyma01g32961	Glyma01g32961	Glyma01g32961	Gm01:44638341-44639787	byo-15-0	byo-15-14	NOTEST	0	0	0	0	1	1	no
Glyma01g32981	Glyma01g32981	Glyma01g32981	Gm01:44662613-44664324	byo-15-0	byo-15-14	NOTEST	0.138613	0.0983177	-0.495536	0.424788	0.670991	1	no
Glyma01g33000	Glyma01g33000	Glyma01g33000	Gm01:44707383-44712370	byo-15-0	byo-15-14	NOTEST	0	0.102396	1.79769e+308	1.79769e+308	0.0814107	1	no
Glyma01g33017	Glyma01g33017	Glyma01g33017	Gm01:44713495-44722187	byo-15-0	byo-15-14	OK	4.85053	3.61478	-0.424237	0.681185	0.495755	0.849975	no
Glyma01g33034	Glyma01g33034	Glyma01g33034	Gm01:44713495-44722187	byo-15-0	byo-15-14	OK	0.892532	0.510162	-0.806948	0.455073	0.649057	0.920146	no
Glyma01g33052	Glyma01g33052	Glyma01g33052	Gm01:44724345-44725089	byo-15-0	byo-15-14	NOTEST	0	0	0	0	1	1	no
Glyma01g33070	Glyma01g33070	Glyma01g33070	Gm01:44755155-44764276	byo-15-0	byo-15-14	OK	0.536639	0.0758006	-2.82367	1.66305	0.0963032	0.40451	no
Glyma01g33080	Glyma01g33080	Glyma01g33080	Gm01:44784821-44785786	byo-15-0	byo-15-14	NOTEST	0	0	0	0	1	1	no
Glyma01g33097	Glyma01g33097	Glyma01g33097	Gm01:44790872-44791190	byo-15-0	byo-15-14	NOTEST	0	0	0	0	1	1	no
Glyma01g33114	Glyma01g33114	Glyma01g33114	Gm01:44806144-44806480	byo-15-0	byo-15-14	NOTEST	0	0	0	0	1	1	no
Glyma01g33132	Glyma01g33132	Glyma01g33132	Gm01:44822529-44827918	byo-15-0	byo-15-14	NOTEST	0	0	0	0	1	1	no
Glyma01g33150	Glyma01g33150	Glyma01g33150	Gm01:44831611-44835997	byo-15-0	byo-15-14	NOTEST	0	0	0	0	1	1	no
Glyma01g33160	Glyma01g33160	Glyma01g33160	Gm01:44884977-44888493	byo-15-0	byo-15-14	NOTEST	0	0	0	0	1	1	no
Glyma01g33170	Glyma01g33170	Glyma01g33170	Gm01:44905880-44910333	byo-15-0	byo-15-14	NOTEST	0	0.0233019	1.79769e+308	1.79769e+308	0.210186	1	no
Glyma01g33181	Glyma01g33181	Glyma01g33181	Gm01:44911452-44912574	byo-15-0	byo-15-14	NOTEST	0	0	0	0	1	1	no
Glyma01g33191	Glyma01g33191	Glyma01g33191	Gm01:44940045-44941190	byo-15-0	byo-15-14	NOTEST	0	0	0	0	1	1	no
Glyma01g33200	Glyma01g33200	Glyma01g33200	Gm01:44962980-44967133	byo-15-0	byo-15-14	OK	19.8818	14.9809	-0.408323	0.725783	0.467972	0.833162	no
Glyma01g33220	Glyma01g33220	Glyma01g33220	Gm01:44980052-44984577	byo-15-0	byo-15-14	OK	6.4318	7.71317	0.262102	-0.442186	0.658355	0.92265	no
Glyma01g33240	Glyma01g33240	Glyma01g33240	Gm01:45046813-45053379	byo-15-0	byo-15-14	OK	4.91623	7.5483	0.618599	-1.08915	0.276087	0.678787	no
Glyma01g33270	Glyma01g33270	Glyma01g33270	Gm01:45164206-45167759	byo-15-0	byo-15-14	OK	5.5893	12.3329	1.14177	-2.00655	0.0447979	0.258584	no
Glyma01g33281	Glyma01g33281	Glyma01g33281	Gm01:45184472-45185139	byo-15-0	byo-15-14	NOTEST	0	0	0	0	1	1	no
Glyma01g33290	Glyma01g33290	Glyma01g33290	Gm01:45230344-45235073	byo-15-0	byo-15-14	OK	3.87689	2.79361	-0.47277	0.800698	0.423307	0.807012	no
Glyma01g33300	Glyma01g33300	Glyma01g33300	Gm01:45287112-45288519	byo-15-0	byo-15-14	NOTEST	0	0	0	0	1	1	no
Glyma01g33313	Glyma01g33313	Glyma01g33313	Gm01:45306250-45306442	byo-15-0	byo-15-14	NOTEST	0	0	0	0	1	1	no
Glyma01g33326	Glyma01g33326	Glyma01g33326	Gm01:45317460-45320741	byo-15-0	byo-15-14	NOTEST	0	0	0	0	1	1	no
Glyma01g33340	Glyma01g33340	Glyma01g33340	Gm01:45339891-45344677	byo-15-0	byo-15-14	OK	0.459034	0.170739	-1.42681	1.33995	0.180261	0.558946	no
Glyma01g33350	Glyma01g33350	Glyma01g33350	Gm01:45352146-45354813	byo-15-0	byo-15-14	NOTEST	0	0	0	0	1	1	no
Glyma01g33370	Glyma01g33370	Glyma01g33370	Gm01:45401644-45404974	byo-15-0	byo-15-14	NOTEST	0.267317	0.254317	-0.0719235	0.0674337	0.946236	1	no
Glyma01g33380	Glyma01g33380	Glyma01g33380	Gm01:45433046-45455133	byo-15-0	byo-15-14	OK	3.01205	3.50408	0.21829	-0.25953	0.795226	0.960561	no
Glyma01g33420	Glyma01g33420	Glyma01g33420	Gm01:45530801-45532165	byo-15-0	byo-15-14	OK	0	0.588824	1.79769e+308	1.79769e+308	0.0124077	0.115212	no
Glyma01g33430	Glyma01g33430	Glyma01g33430	Gm01:45548731-45551079	byo-15-0	byo-15-14	NOTEST	0	0	0	0	1	1	no
Glyma01g33440	Glyma01g33440	Glyma01g33440	Gm01:45561036-45565329	byo-15-0	byo-15-14	NOTEST	0.0381465	0.0796115	1.06143	-0.734055	0.462915	1	no
Glyma01g33461	Glyma01g33461	Glyma01g33461	Gm01:45637083-45640786	byo-15-0	byo-15-14	NOTEST	0	0.00811867	1.79769e+308	1.79769e+308	0.284417	1	no
Glyma01g33480	Glyma01g33480	Glyma01g33480	Gm01:45640951-45643255	byo-15-0	byo-15-14	NOTEST	0	0	0	0	1	1	no
Glyma01g33500	Glyma01g33500	Glyma01g33500	Gm01:45666010-45668198	byo-15-0	byo-15-14	NOTEST	0	0	0	0	1	1	no
Glyma01g33510	Glyma01g33510	Glyma01g33510	Gm01:45669204-45672362	byo-15-0	byo-15-14	NOTEST	0	0.0116343	1.79769e+308	1.79769e+308	0.284417	1	no
Glyma01g33520	Glyma01g33520	Glyma01g33520	Gm01:45685075-45692774	byo-15-0	byo-15-14	OK	7.97109	10.1119	0.343211	-0.563022	0.57342	0.889955	no
Glyma01g33560	Glyma01g33560	Glyma01g33560	Gm01:45743456-45744317	byo-15-0	byo-15-14	NOTEST	0	0	0	0	1	1	no
Glyma01g33575	Glyma01g33575	Glyma01g33575	Gm01:45782142-45782607	byo-15-0	byo-15-14	NOTEST	0	0	0	0	1	1	no
Glyma01g33590	Glyma01g33590	Glyma01g33590	Gm01:45785878-45786501	byo-15-0	byo-15-14	NOTEST	0	0.282493	1.79769e+308	1.79769e+308	0.0814107	1	no
Glyma01g33600	Glyma01g33600	Glyma01g33600	Gm01:45786844-45790318	byo-15-0	byo-15-14	OK	4.64877	6.36029	0.452245	-0.657539	0.510834	0.857181	no
Glyma01g33610	Glyma01g33610	Glyma01g33610	Gm01:45796676-45800002	byo-15-0	byo-15-14	OK	6.27773	5.56527	-0.173793	0.295189	0.767849	0.952884	no
Glyma01g33620	Glyma01g33620	Glyma01g33620	Gm01:45803536-45806513	byo-15-0	byo-15-14	OK	0.871963	1.18436	0.44177	-0.550703	0.581837	0.892774	no
Glyma01g33635	Glyma01g33635	Glyma01g33635	Gm01:45827324-45830713	byo-15-0	byo-15-14	NOTEST	0	0	0	0	1	1	no
Glyma01g33650	Glyma01g33650	Glyma01g33650	Gm01:45852397-45854700	byo-15-0	byo-15-14	OK	2.71283	3.13315	0.207814	-0.341145	0.732995	0.94327	no
Glyma01g33660	Glyma01g33660	Glyma01g33660	Gm01:45858147-45867014	byo-15-0	byo-15-14	OK	21.0769	21.2125	0.00925201	-0.0158342	0.987367	0.99827	no
Glyma01g33676	Glyma01g33676	Glyma01g33676	Gm01:45892351-45898318	byo-15-0	byo-15-14	OK	1.09691	1.56489	0.512616	-0.743082	0.457432	0.829023	no
Glyma01g33692	Glyma01g33692	Glyma01g33692	Gm01:45905544-45906417	byo-15-0	byo-15-14	NOTEST	0	0	0	0	1	1	no
Glyma01g33708	Glyma01g33708	Glyma01g33708	Gm01:45911622-45912362	byo-15-0	byo-15-14	NOTEST	0	0	0	0	1	1	no
Glyma01g33724	Glyma01g33724	Glyma01g33724	Gm01:45932771-45933893	byo-15-0	byo-15-14	OK	3.71646	4.97697	0.42134	-0.660813	0.508733	0.856359	no
Glyma01g33740	Glyma01g33740	Glyma01g33740	Gm01:45948913-45964890	byo-15-0	byo-15-14	NOTEST	0	0	0	0	1	1	no
Glyma01g33761	Glyma01g33761	Glyma01g33761	Gm01:45948913-45964890	byo-15-0	byo-15-14	OK	4.35505	3.14493	-0.469663	0.730126	0.465313	0.832322	no
Glyma01g33782	Glyma01g33782	Glyma01g33782	Gm01:45948913-45964890	byo-15-0	byo-15-14	NOTEST	0	0.0715863	1.79769e+308	1.79769e+308	0.353883	1	no
Glyma01g33803	Glyma01g33803	Glyma01g33803	Gm01:45990835-45994797	byo-15-0	byo-15-14	NOTEST	0	0	0	0	1	1	no
Glyma01g33824	Glyma01g33824	Glyma01g33824	Gm01:46002247-46005198	byo-15-0	byo-15-14	NOTEST	0	0	0	0	1	1	no
Glyma01g33845	Glyma01g33845	Glyma01g33845	Gm01:46007636-46011913	byo-15-0	byo-15-14	NOTEST	0.0638645	0.256631	2.00661	-1.707	0.0878223	1	no
Glyma01g33866	Glyma01g33866	Glyma01g33866	Gm01:46043835-46074615	byo-15-0	byo-15-14	OK	4.972	4.19588	-0.244854	0.41557	0.677724	0.928901	no
Glyma01g33888	Glyma01g33888	Glyma01g33888	Gm01:46096266-46097858	byo-15-0	byo-15-14	NOTEST	0	0	0	0	1	1	no
Glyma01g33910	Glyma01g33910	Glyma01g33910	Gm01:46103382-46104985	byo-15-0	byo-15-14	NOTEST	0.363709	0.373719	0.0391707	-0.0388424	0.969016	1	no
Glyma01g33920	Glyma01g33920	Glyma01g33920	Gm01:46115248-46117119	byo-15-0	byo-15-14	NOTEST	0	0	0	0	1	1	no
Glyma01g33960	Glyma01g33960	Glyma01g33960	Gm01:46237540-46239330	byo-15-0	byo-15-14	NOTEST	0	0.0263497	1.79769e+308	1.79769e+308	0.317705	1	no
Glyma01g33986	Glyma01g33986	Glyma01g33986	Gm01:46305207-46307924	byo-15-0	byo-15-14	NOTEST	0	0.0492061	1.79769e+308	1.79769e+308	0.127239	1	no
Glyma01g34013	Glyma01g34013	Glyma01g34013	Gm01:46321601-46322033	byo-15-0	byo-15-14	NOTEST	0	0	0	0	1	1	no
Glyma01g34040	Glyma01g34040	Glyma01g34040	Gm01:46325425-46325842	byo-15-0	byo-15-14	NOTEST	0	0	0	0	1	1	no
Glyma01g34060	Glyma01g34060	Glyma01g34060	Gm01:46360579-46360996	byo-15-0	byo-15-14	NOTEST	0	0	0	0	1	1	no
Glyma01g34111	Glyma01g34111	Glyma01g34111	Gm01:46405622-46406054	byo-15-0	byo-15-14	NOTEST	0	0	0	0	1	1	no
Glyma01g34160	Glyma01g34160	Glyma01g34160	Gm01:46426795-46427518	byo-15-0	byo-15-14	NOTEST	0	0	0	0	1	1	no
Glyma01g34180	Glyma01g34180	Glyma01g34180	Gm01:46434724-46435093	byo-15-0	byo-15-14	NOTEST	0	0	0	0	1	1	no
Glyma01g34210	Glyma01g34210	Glyma01g34210	Gm01:46467747-46468471	byo-15-0	byo-15-14	NOTEST	0	0	0	0	1	1	no
Glyma01g34223	Glyma01g34223	Glyma01g34223	Gm01:46519589-46520799	byo-15-0	byo-15-14	NOTEST	0	0	0	0	1	1	no
Glyma01g34236	Glyma01g34236	Glyma01g34236	Gm01:46527137-46531737	byo-15-0	byo-15-14	OK	2.07352	0.130895	-3.9856	3.57719	0.000347313	0.00930993	yes
Glyma01g34250	Glyma01g34250	Glyma01g34250	Gm01:46534521-46534953	byo-15-0	byo-15-14	NOTEST	0	0	0	0	1	1	no
Glyma01g34260	Glyma01g34260	Glyma01g34260	Gm01:46537220-46537655	byo-15-0	byo-15-14	NOTEST	0	0	0	0	1	1	no
Glyma01g34270	Glyma01g34270	Glyma01g34270	Gm01:46573515-46583536	byo-15-0	byo-15-14	OK	6.83509	5.19443	-0.395993	0.663455	0.507039	0.855921	no
Glyma01g34300	Glyma01g34300	Glyma01g34300	Gm01:46676161-46677711	byo-15-0	byo-15-14	OK	243.626	356.157	0.547846	-0.673777	0.500453	0.852314	no
Glyma01g34321	Glyma01g34321	Glyma01g34321	Gm01:46693841-46694273	byo-15-0	byo-15-14	NOTEST	0	0	0	0	1	1	no
Glyma01g34340	Glyma01g34340	Glyma01g34340	Gm01:46707889-46726051	byo-15-0	byo-15-14	NOTEST	0	0	0	0	1	1	no
Glyma01g34350	Glyma01g34350	Glyma01g34350	Gm01:46731685-46740931	byo-15-0	byo-15-14	OK	2.6436	2.51737	-0.0705874	0.118632	0.905567	0.983609	no
Glyma01g34360	Glyma01g34360	Glyma01g34360	Gm01:46742637-46747004	byo-15-0	byo-15-14	NOTEST	0.383648	0.311882	-0.298785	0.240013	0.81032	1	no
Glyma01g34370	Glyma01g34370	Glyma01g34370	Gm01:46749398-46751642	byo-15-0	byo-15-14	NOTEST	0	0	0	0	1	1	no
Glyma01g34380	Glyma01g34380	Glyma01g34380	Gm01:46754477-46758976	byo-15-0	byo-15-14	OK	0.554918	3.83944	2.79055	-3.37809	0.000729924	0.0158769	yes
Glyma01g34400	Glyma01g34400	Glyma01g34400	Gm01:46763231-46763483	byo-15-0	byo-15-14	OK	2.70321	5.28317	0.96673	-0.657195	0.511056	0.857212	no
Glyma01g34410	Glyma01g34410	Glyma01g34410	Gm01:46764767-46772182	byo-15-0	byo-15-14	OK	2.07425	4.76837	1.20091	-1.7481	0.080446	0.365426	no
Glyma01g34420	Glyma01g34420	Glyma01g34420	Gm01:46787052-46789561	byo-15-0	byo-15-14	NOTEST	0	0.0787211	1.79769e+308	1.79769e+308	0.0814107	1	no
Glyma01g34443	Glyma01g34443	Glyma01g34443	Gm01:46808690-46811728	byo-15-0	byo-15-14	NOTEST	0	0	0	0	1	1	no
Glyma01g34466	Glyma01g34466	Glyma01g34466	Gm01:46825911-46827713	byo-15-0	byo-15-14	NOTEST	0	0	0	0	1	1	no
Glyma01g34490	Glyma01g34490	Glyma01g34490	Gm01:46835873-46838757	byo-15-0	byo-15-14	NOTEST	0	0.102619	1.79769e+308	1.79769e+308	0.0814107	1	no
Glyma01g34506	Glyma01g34506	Glyma01g34506	Gm01:46869789-46881811	byo-15-0	byo-15-14	OK	1.45689	1.92905	0.405005	-0.612775	0.540025	0.874205	no
Glyma01g34523	Glyma01g34523	Glyma01g34523	Gm01:46869789-46881811	byo-15-0	byo-15-14	NOTEST	0	0.0509568	1.79769e+308	1.79769e+308	0.416791	1	no
Glyma01g34540	Glyma01g34540	Glyma01g34540	Gm01:46906412-46911701	byo-15-0	byo-15-14	NOTEST	0.114973	0.212626	0.887019	-0.771591	0.440357	1	no
Glyma01g34560	Glyma01g34560	Glyma01g34560	Gm01:46925228-46938022	byo-15-0	byo-15-14	OK	1.91008	1.90987	-0.000158218	0.0002389	0.999809	0.999996	no
Glyma01g34570	Glyma01g34570	Glyma01g34570	Gm01:46940993-46942519	byo-15-0	byo-15-14	NOTEST	0.0603818	0.0947827	0.650511	-0.442225	0.658326	1	no
Glyma01g34580	Glyma01g34580	Glyma01g34580	Gm01:46987337-46989392	byo-15-0	byo-15-14	NOTEST	0	0	0	0	1	1	no
Glyma01g34590	Glyma01g34590	Glyma01g34590	Gm01:46994947-47011742	byo-15-0	byo-15-14	OK	0.286345	0.44546	0.637545	-0.778286	0.436401	0.815919	no
Glyma01g34605	Glyma01g34605	Glyma01g34605	Gm01:47017352-47017572	byo-15-0	byo-15-14	NOTEST	0	0	0	0	1	1	no
Glyma01g34620	Glyma01g34620	Glyma01g34620	Gm01:47044532-47046263	byo-15-0	byo-15-14	NOTEST	0.0943277	0.145985	0.630069	-0.428328	0.668412	1	no
Glyma01g34630	Glyma01g34630	Glyma01g34630	Gm01:47059946-47069275	byo-15-0	byo-15-14	OK	9.42065	6.94888	-0.439047	0.723664	0.469272	0.833976	no
Glyma01g34650	Glyma01g34650	Glyma01g34650	Gm01:47081810-47085604	byo-15-0	byo-15-14	NOTEST	0	0.119143	1.79769e+308	1.79769e+308	0.0899331	1	no
Glyma01g34660	Glyma01g34660	Glyma01g34660	Gm01:47090148-47094163	byo-15-0	byo-15-14	OK	20.6514	17.5286	-0.236534	0.410924	0.681128	0.929225	no
Glyma01g34671	Glyma01g34671	Glyma01g34671	Gm01:47112164-47117514	byo-15-0	byo-15-14	NOTEST	0	0	0	0	1	1	no
Glyma01g34680	Glyma01g34680	Glyma01g34680	Gm01:47129774-47133165	byo-15-0	byo-15-14	OK	2.19329	1.02262	-1.10083	1.43398	0.151579	0.510764	no
Glyma01g34690	Glyma01g34690	Glyma01g34690	Gm01:47136977-47141477	byo-15-0	byo-15-14	OK	6.64117	6.7435	0.0220596	-0.0316679	0.974737	0.995924	no
Glyma01g34700	Glyma01g34700	Glyma01g34700	Gm01:47141945-47148729	byo-15-0	byo-15-14	OK	140.983	96.162	-0.551982	0.626491	0.530993	0.868707	no
Glyma01g34710	Glyma01g34710	Glyma01g34710	Gm01:47159471-47160816	byo-15-0	byo-15-14	NOTEST	0	0	0	0	1	1	no
Glyma01g34723	Glyma01g34723	Glyma01g34723	Gm01:47186498-47195065	byo-15-0	byo-15-14	NOTEST	0	0.0408062	1.79769e+308	1.79769e+308	0.25808	1	no
Glyma01g34736	Glyma01g34736	Glyma01g34736	Gm01:47186498-47195065	byo-15-0	byo-15-14	NOTEST	0.0906917	0.0141239	-2.68283	0.586981	0.557216	1	no
Glyma01g34750	Glyma01g34750	Glyma01g34750	Gm01:47186498-47195065	byo-15-0	byo-15-14	NOTEST	0	0	0	0	1	1	no
Glyma01g34760	Glyma01g34760	Glyma01g34760	Gm01:47218316-47222203	byo-15-0	byo-15-14	NOTEST	0	0	0	0	1	1	no
Glyma01g34770	Glyma01g34770	Glyma01g34770	Gm01:47223841-47226695	byo-15-0	byo-15-14	NOTEST	0	0	0	0	1	1	no
Glyma01g34780	Glyma01g34780	Glyma01g34780	Gm01:47252139-47259720	byo-15-0	byo-15-14	OK	9.66412	8.04555	-0.264447	0.430266	0.667002	0.925454	no
Glyma01g34791	Glyma01g34791	Glyma01g34791	Gm01:47272202-47272649	byo-15-0	byo-15-14	NOTEST	0	0	0	0	1	1	no
Glyma01g34800	Glyma01g34800	Glyma01g34800	Gm01:47276056-47279637	byo-15-0	byo-15-14	NOTEST	0.318506	0.198343	-0.683318	0.645988	0.518287	1	no
Glyma01g34820	Glyma01g34820	Glyma01g34820	Gm01:47295116-47298579	byo-15-0	byo-15-14	OK	6.18945	9.1996	0.57176	-1.01189	0.311592	0.716373	no
Glyma01g34830	Glyma01g34830	Glyma01g34830	Gm01:47301280-47303164	byo-15-0	byo-15-14	NOTEST	0.215767	0.0691042	-1.64263	1.42985	0.15276	1	no
Glyma01g34840	Glyma01g34840	Glyma01g34840	Gm01:47306519-47315257	byo-15-0	byo-15-14	OK	4.99988	2.28637	-1.12883	1.96678	0.0492091	0.273135	no
Glyma01g34890	Glyma01g34890	Glyma01g34890	Gm01:47380345-47383987	byo-15-0	byo-15-14	NOTEST	0	0	0	0	1	1	no
Glyma01g34930	Glyma01g34930	Glyma01g34930	Gm01:47416768-47417287	byo-15-0	byo-15-14	OK	0.723417	2.52503	1.8034	-1.82159	0.0685175	0.332656	no
Glyma01g34940	Glyma01g34940	Glyma01g34940	Gm01:47418176-47422790	byo-15-0	byo-15-14	OK	4.24184	2.95979	-0.519196	0.803007	0.421971	0.806326	no
Glyma01g34950	Glyma01g34950	Glyma01g34950	Gm01:47484620-47488243	byo-15-0	byo-15-14	NOTEST	0.0971263	0	-1.79769e+308	-1.79769e+308	0.351897	1	no
Glyma01g34960	Glyma01g34960	Glyma01g34960	Gm01:47484620-47488243	byo-15-0	byo-15-14	OK	0.805437	0.391289	-1.04154	1.24527	0.213034	0.60265	no
Glyma01g34971	Glyma01g34971	Glyma01g34971	Gm01:47509796-47513893	byo-15-0	byo-15-14	NOTEST	0	0	0	0	1	1	no
Glyma01g34980	Glyma01g34980	Glyma01g34980	Gm01:47515002-47518685	byo-15-0	byo-15-14	OK	0.952182	3.91924	2.04127	-3.13362	0.00172666	0.0299301	yes
Glyma01g34990	Glyma01g34990	Glyma01g34990	Gm01:47519487-47522901	byo-15-0	byo-15-14	OK	0.783917	1.79367	1.19414	-1.54831	0.121547	0.456068	no
Glyma01g35010	Glyma01g35010	Glyma01g35010	Gm01:47557393-47559050	byo-15-0	byo-15-14	OK	1.75106	1.15956	-0.594649	0.797234	0.425315	0.80805	no
Glyma01g35030	Glyma01g35030	Glyma01g35030	Gm01:47605850-47609703	byo-15-0	byo-15-14	OK	28.369	19.8356	-0.51622	0.903624	0.366195	0.763856	no
Glyma01g35043	Glyma01g35043	Glyma01g35043	Gm01:47610784-47630469	byo-15-0	byo-15-14	OK	4.47116	2.6214	-0.770313	1.14514	0.252153	0.652586	no
Glyma01g35056	Glyma01g35056	Glyma01g35056	Gm01:47635648-47638176	byo-15-0	byo-15-14	NOTEST	0.124437	0.209963	0.754714	-0.705804	0.48031	1	no
Glyma01g35070	Glyma01g35070	Glyma01g35070	Gm01:47640057-47641838	byo-15-0	byo-15-14	NOTEST	0	0	0	0	1	1	no
Glyma01g35083	Glyma01g35083	Glyma01g35083	Gm01:47647068-47659579	byo-15-0	byo-15-14	OK	3.53028	5.17794	0.552595	-0.91832	0.358451	0.757011	no
Glyma01g35096	Glyma01g35096	Glyma01g35096	Gm01:47647068-47659579	byo-15-0	byo-15-14	NOTEST	0.398829	0.365906	-0.124296	0.0602764	0.951935	1	no
Glyma01g35110	Glyma01g35110	Glyma01g35110	Gm01:47674344-47678727	byo-15-0	byo-15-14	OK	2.72307	2.66508	-0.0310555	0.0451584	0.963981	0.99405	no
Glyma01g35120	Glyma01g35120	Glyma01g35120	Gm01:47680344-47682544	byo-15-0	byo-15-14	NOTEST	0	0	0	0	1	1	no
Glyma01g35130	Glyma01g35130	Glyma01g35130	Gm01:47684337-47693236	byo-15-0	byo-15-14	OK	19.003	14.0381	-0.436876	0.770961	0.44073	0.818296	no
Glyma01g35145	Glyma01g35145	Glyma01g35145	Gm01:47696213-47700220	byo-15-0	byo-15-14	OK	1.77289	2.17214	0.293013	-0.424654	0.671089	0.926717	no
Glyma01g35160	Glyma01g35160	Glyma01g35160	Gm01:47703725-47705225	byo-15-0	byo-15-14	OK	3.76175	1.52918	-1.29865	1.85349	0.0638121	0.318883	no
Glyma01g35170	Glyma01g35170	Glyma01g35170	Gm01:47707392-47708756	byo-15-0	byo-15-14	OK	5.2797	15.4014	1.54453	-2.54803	0.0108333	0.106119	no
Glyma01g35180	Glyma01g35180	Glyma01g35180	Gm01:47718336-47725678	byo-15-0	byo-15-14	NOTEST	0.0521189	0.34759	2.73751	-1.44422	0.148676	1	no
Glyma01g35190	Glyma01g35190	Glyma01g35190	Gm01:47727548-47732948	byo-15-0	byo-15-14	OK	34.6394	20.7489	-0.739377	1.2459	0.2128	0.602578	no
Glyma01g35201	Glyma01g35201	Glyma01g35201	Gm01:47733363-47734311	byo-15-0	byo-15-14	OK	4.03544	3.05175	-0.403091	0.368284	0.712661	0.937898	no
Glyma01g35211	Glyma01g35211	Glyma01g35211	Gm01:47738908-47740460	byo-15-0	byo-15-14	NOTEST	0	0.0260939	1.79769e+308	1.79769e+308	0.210186	1	no
Glyma01g35220	Glyma01g35220	Glyma01g35220	Gm01:47744055-47749293	byo-15-0	byo-15-14	OK	48.4286	71.5452	0.562997	-0.717587	0.473012	0.835601	no
Glyma01g35230	Glyma01g35230	Glyma01g35230	Gm01:47776150-47780905	byo-15-0	byo-15-14	OK	12.0133	7.12101	-0.754475	1.30205	0.192901	0.575875	no
Glyma01g35255	Glyma01g35255	Glyma01g35255	Gm01:47796276-47802389	byo-15-0	byo-15-14	NOTEST	0.0307747	0.0370387	0.267289	-0.171449	0.86387	1	no
Glyma01g35280	Glyma01g35280	Glyma01g35280	Gm01:47816224-47821828	byo-15-0	byo-15-14	OK	92.2628	45.4379	-1.02185	1.66215	0.0964831	0.404727	no
Glyma01g35291	Glyma01g35291	Glyma01g35291	Gm01:47825541-47831516	byo-15-0	byo-15-14	OK	0.94155	0.691813	-0.444656	0.517984	0.60447	0.903099	no
Glyma01g35300	Glyma01g35300	Glyma01g35300	Gm01:47832148-47834125	byo-15-0	byo-15-14	OK	3.32623	4.91761	0.564072	-0.87907	0.379363	0.774551	no
Glyma01g35310	Glyma01g35310	Glyma01g35310	Gm01:47838176-47839418	byo-15-0	byo-15-14	NOTEST	0	0.0896839	1.79769e+308	1.79769e+308	0.0814107	1	no
Glyma01g35315	Glyma01g35315	Glyma01g35315	Gm01:47840273-47842107	byo-15-0	byo-15-14	NOTEST	0.0872389	0.0402256	-1.11686	0.522581	0.601266	1	no
Glyma01g35320	Glyma01g35320	Glyma01g35320	Gm01:47843480-47846444	byo-15-0	byo-15-14	OK	11.7826	10.8153	-0.123592	0.219858	0.825982	0.965919	no
Glyma01g35330	Glyma01g35330	Glyma01g35330	Gm01:47852135-47854503	byo-15-0	byo-15-14	OK	3.82674	2.43328	-0.653215	1.05176	0.292908	0.697251	no
Glyma01g35360	Glyma01g35360	Glyma01g35360	Gm01:47868564-47871498	byo-15-0	byo-15-14	OK	22.119	20.5657	-0.105047	0.185775	0.852621	0.972491	no
Glyma01g35370	Glyma01g35370	Glyma01g35370	Gm01:47876579-47879048	byo-15-0	byo-15-14	OK	2.33475	4.09488	0.810556	-1.28944	0.197247	0.582394	no
Glyma01g35381	Glyma01g35381	Glyma01g35381	Gm01:47882778-47885490	byo-15-0	byo-15-14	OK	15.6397	9.01166	-0.795345	1.27464	0.202438	0.590096	no
Glyma01g35390	Glyma01g35390	Glyma01g35390	Gm01:47891482-47901268	byo-15-0	byo-15-14	OK	11.6475	16.9125	0.538074	-0.938659	0.347906	0.748753	no
Glyma01g35400	Glyma01g35400	Glyma01g35400	Gm01:47904409-47909019	byo-15-0	byo-15-14	OK	1.52756	1.23288	-0.3092	0.423424	0.671986	0.927047	no
Glyma01g35410	Glyma01g35410	Glyma01g35410	Gm01:47910023-47911708	byo-15-0	byo-15-14	NOTEST	0	0.164986	1.79769e+308	1.79769e+308	0.0313809	1	no
Glyma01g35420	Glyma01g35420	Glyma01g35420	Gm01:47912898-47913228	byo-15-0	byo-15-14	OK	0	0.62081	1.79769e+308	1.79769e+308	0.127239	0.46581	no
Glyma01g35430	Glyma01g35430	Glyma01g35430	Gm01:47926149-47931104	byo-15-0	byo-15-14	NOTEST	0.0450531	0.0376109	-0.260475	0.151276	0.879758	1	no
Glyma01g35440	Glyma01g35440	Glyma01g35440	Gm01:47932186-47933647	byo-15-0	byo-15-14	NOTEST	0.119982	0.100925	-0.249534	0.20045	0.841129	1	no
Glyma01g35450	Glyma01g35450	Glyma01g35450	Gm01:47933912-47939040	byo-15-0	byo-15-14	OK	20.2479	5.80656	-1.80201	3.1267	0.00176779	0.0304711	yes
Glyma01g35460	Glyma01g35460	Glyma01g35460	Gm01:47946562-47947368	byo-15-0	byo-15-14	OK	4.05547	5.69396	0.489563	-0.696203	0.486302	0.845316	no
Glyma01g35470	Glyma01g35470	Glyma01g35470	Gm01:47950106-47953985	byo-15-0	byo-15-14	OK	0.524671	0.986015	0.910196	-0.980036	0.327068	0.729954	no
Glyma01g35480	Glyma01g35480	Glyma01g35480	Gm01:47964085-47972060	byo-15-0	byo-15-14	OK	3.09005	4.71271	0.608926	-0.830948	0.406003	0.79315	no
Glyma01g35490	Glyma01g35490	Glyma01g35490	Gm01:47975124-47980649	byo-15-0	byo-15-14	OK	2.98783	3.31959	0.151909	-0.256412	0.797633	0.960969	no
Glyma01g35500	Glyma01g35500	Glyma01g35500	Gm01:47984869-47990016	byo-15-0	byo-15-14	OK	0.616944	0.486952	-0.341359	0.409285	0.682331	0.92938	no
Glyma01g35510	Glyma01g35510	Glyma01g35510	Gm01:47990548-47991258	byo-15-0	byo-15-14	NOTEST	0.200808	0.326887	0.702977	-0.477892	0.632727	1	no
Glyma01g35530	Glyma01g35530	Glyma01g35530	Gm01:48002890-48006714	byo-15-0	byo-15-14	OK	0.0490431	1.47507	4.91059	-3.84797	0.0001191	0.00418123	yes
Glyma01g35540	Glyma01g35540	Glyma01g35540	Gm01:48012025-48020478	byo-15-0	byo-15-14	OK	1.08648	2.57855	1.2469	-1.8409	0.0656361	0.323553	no
Glyma01g35551	Glyma01g35551	Glyma01g35551	Gm01:48045791-48046532	byo-15-0	byo-15-14	NOTEST	0.19075	0.315644	0.726615	-0.493961	0.621334	1	no
Glyma01g35561	Glyma01g35561	Glyma01g35561	Gm01:48046627-48048949	byo-15-0	byo-15-14	NOTEST	0.225003	0.0170672	-3.72065	1.92815	0.0538367	1	no
Glyma01g35570	Glyma01g35570	Glyma01g35570	Gm01:48069521-48070621	byo-15-0	byo-15-14	OK	3.1554	1.37841	-1.19482	1.47013	0.141528	0.492776	no
Glyma01g35580	Glyma01g35580	Glyma01g35580	Gm01:48077865-48083725	byo-15-0	byo-15-14	OK	1.03967	1.79222	0.785613	-0.951294	0.341455	0.743316	no
Glyma01g35590	Glyma01g35590	Glyma01g35590	Gm01:48086193-48086883	byo-15-0	byo-15-14	OK	0.132862	0.687518	2.37147	-1.72358	0.0847836	0.375845	no
Glyma01g35600	Glyma01g35600	Glyma01g35600	Gm01:48088646-48092573	byo-15-0	byo-15-14	OK	3.29482	2.64302	-0.318013	0.459144	0.64613	0.919205	no
Glyma01g35611	Glyma01g35611	Glyma01g35611	Gm01:48106435-48107149	byo-15-0	byo-15-14	NOTEST	0	0	0	0	1	1	no
Glyma01g35620	Glyma01g35620	Glyma01g35620	Gm01:48132072-48139955	byo-15-0	byo-15-14	OK	57.2409	22.9283	-1.31992	2.04368	0.0409849	0.24458	no
Glyma01g35630	Glyma01g35630	Glyma01g35630	Gm01:48142117-48144321	byo-15-0	byo-15-14	OK	0.381103	1.39856	1.87569	-2.12562	0.033535	0.215289	no
Glyma01g35640	Glyma01g35640	Glyma01g35640	Gm01:48145384-48152470	byo-15-0	byo-15-14	OK	0.61547	1.65362	1.42587	-1.92839	0.0538065	0.286484	no
Glyma01g35650	Glyma01g35650	Glyma01g35650	Gm01:48157272-48165868	byo-15-0	byo-15-14	OK	4.07452	3.62265	-0.169587	0.297075	0.766409	0.952565	no
Glyma01g35660	Glyma01g35660	Glyma01g35660	Gm01:48174704-48177832	byo-15-0	byo-15-14	OK	0.455701	1.37614	1.59446	-1.69254	0.0905433	0.391524	no
Glyma01g35671	Glyma01g35671	Glyma01g35671	Gm01:48220843-48221643	byo-15-0	byo-15-14	OK	37.9582	17.7865	-1.09363	1.86346	0.0623971	0.313811	no
Glyma01g35681	Glyma01g35681	Glyma01g35681	Gm01:48221730-48222524	byo-15-0	byo-15-14	NOTEST	0	0	0	0	1	1	no
Glyma01g35690	Glyma01g35690	Glyma01g35690	Gm01:48227988-48235632	byo-15-0	byo-15-14	OK	1.24049	1.57297	0.342585	-0.494274	0.621113	0.909521	no
Glyma01g35700	Glyma01g35700	Glyma01g35700	Gm01:48235761-48238962	byo-15-0	byo-15-14	NOTEST	0.0267394	0.103884	1.95793	-1.41569	0.156867	1	no
Glyma01g35711	Glyma01g35711	Glyma01g35711	Gm01:48242478-48244212	byo-15-0	byo-15-14	NOTEST	0	0	0	0	1	1	no
Glyma01g35720	Glyma01g35720	Glyma01g35720	Gm01:48246126-48248948	byo-15-0	byo-15-14	NOTEST	0.0647676	0.0271182	-1.25601	0.587693	0.556738	1	no
Glyma01g35730	Glyma01g35730	Glyma01g35730	Gm01:48251598-48253821	byo-15-0	byo-15-14	NOTEST	0.266312	0.21251	-0.325588	0.284755	0.775831	1	no
Glyma01g35740	Glyma01g35740	Glyma01g35740	Gm01:48256233-48258418	byo-15-0	byo-15-14	OK	2.69176	1.84966	-0.541292	0.727382	0.466992	0.832562	no
Glyma01g35750	Glyma01g35750	Glyma01g35750	Gm01:48262136-48265375	byo-15-0	byo-15-14	OK	7.77846	11.4664	0.55985	-0.981304	0.326443	0.729416	no
Glyma01g35780	Glyma01g35780	Glyma01g35780	Gm01:48276784-48278711	byo-15-0	byo-15-14	OK	8.79118	14.8936	0.760567	-1.22806	0.219426	0.611707	no
Glyma01g35790	Glyma01g35790	Glyma01g35790	Gm01:48279936-48284217	byo-15-0	byo-15-14	OK	5.15239	5.52474	0.100663	-0.176852	0.859624	0.974093	no
Glyma01g35800	Glyma01g35800	Glyma01g35800	Gm01:48289113-48292398	byo-15-0	byo-15-14	OK	0.96009	0.826005	-0.21702	0.295994	0.767234	0.952827	no
Glyma01g35820	Glyma01g35820	Glyma01g35820	Gm01:48321786-48329293	byo-15-0	byo-15-14	OK	0.913596	1.0176	0.155539	-0.215547	0.829341	0.966734	no
Glyma01g35830	Glyma01g35830	Glyma01g35830	Gm01:48330613-48331119	byo-15-0	byo-15-14	OK	0.677307	0.526564	-0.363202	0.210938	0.832936	0.96703	no
Glyma01g35840	Glyma01g35840	Glyma01g35840	Gm01:48332060-48333217	byo-15-0	byo-15-14	OK	2.05511	1.91931	-0.0986297	0.126611	0.899249	0.982197	no
Glyma01g35850	Glyma01g35850	Glyma01g35850	Gm01:48334976-48338851	byo-15-0	byo-15-14	OK	4.96394	3.60229	-0.462572	0.804998	0.420821	0.805339	no
Glyma01g35880	Glyma01g35880	Glyma01g35880	Gm01:48348796-48349428	byo-15-0	byo-15-14	NOTEST	0	0	0	0	1	1	no
Glyma01g35910	Glyma01g35910	Glyma01g35910	Gm01:48361827-48364787	byo-15-0	byo-15-14	OK	125.167	105.806	-0.242438	0.317795	0.750641	0.948496	no
Glyma01g35920	Glyma01g35920	Glyma01g35920	Gm01:48373909-48375181	byo-15-0	byo-15-14	OK	1.5421	4.6694	1.59834	-2.25071	0.0244042	0.176634	no
Glyma01g35931	Glyma01g35931	Glyma01g35931	Gm01:48376295-48378301	byo-15-0	byo-15-14	NOTEST	0	0	0	0	1	1	no
Glyma01g35940	Glyma01g35940	Glyma01g35940	Gm01:48378830-48383355	byo-15-0	byo-15-14	OK	1.72799	2.54235	0.557069	-0.873814	0.382219	0.776448	no
Glyma01g35950	Glyma01g35950	Glyma01g35950	Gm01:48392038-48401536	byo-15-0	byo-15-14	OK	1.81101	3.05436	0.754078	-1.28413	0.199098	0.584782	no
Glyma01g35960	Glyma01g35960	Glyma01g35960	Gm01:48412616-48415065	byo-15-0	byo-15-14	NOTEST	0	0.0274748	1.79769e+308	1.79769e+308	0.210186	1	no
Glyma01g35970	Glyma01g35970	Glyma01g35970	Gm01:48419129-48422033	byo-15-0	byo-15-14	NOTEST	0	0	0	0	1	1	no
Glyma01g35980	Glyma01g35980	Glyma01g35980	Gm01:48422961-48427391	byo-15-0	byo-15-14	OK	0.572406	0.862937	0.592216	-0.78148	0.43452	0.814801	no
Glyma01g35990	Glyma01g35990	Glyma01g35990	Gm01:48439916-48441659	byo-15-0	byo-15-14	OK	3.45715	3.4206	-0.0153373	0.0230391	0.981619	0.997031	no
Glyma01g36000	Glyma01g36000	Glyma01g36000	Gm01:48442886-48447854	byo-15-0	byo-15-14	OK	1.32819	2.3863	0.845309	-1.31896	0.187182	0.568558	no
Glyma01g36011	Glyma01g36011	Glyma01g36011	Gm01:48469240-48475758	byo-15-0	byo-15-14	OK	2.17606	1.83835	-0.243301	0.347566	0.728166	0.942539	no
Glyma01g36021	Glyma01g36021	Glyma01g36021	Gm01:48476497-48478317	byo-15-0	byo-15-14	NOTEST	0	0	0	0	1	1	no
Glyma01g36030	Glyma01g36030	Glyma01g36030	Gm01:48481465-48486456	byo-15-0	byo-15-14	OK	8.18905	2.94838	-1.47377	2.16519	0.0303728	0.202973	no
Glyma01g36040	Glyma01g36040	Glyma01g36040	Gm01:48503695-48509106	byo-15-0	byo-15-14	OK	1.67718	2.19269	0.386665	-0.588717	0.556051	0.882553	no
Glyma01g36050	Glyma01g36050	Glyma01g36050	Gm01:48515192-48516090	byo-15-0	byo-15-14	NOTEST	0.218023	0.0864837	-1.33398	0.870076	0.384259	1	no
Glyma01g36070	Glyma01g36070	Glyma01g36070	Gm01:48524087-48529043	byo-15-0	byo-15-14	OK	10.1937	8.68699	-0.230747	0.40891	0.682606	0.92938	no
Glyma01g36080	Glyma01g36080	Glyma01g36080	Gm01:48537766-48542585	byo-15-0	byo-15-14	OK	2.97643	2.05868	-0.53186	0.844406	0.398442	0.787355	no
Glyma01g36091	Glyma01g36091	Glyma01g36091	Gm01:48559460-48570512	byo-15-0	byo-15-14	OK	1.62374	1.00596	-0.690749	0.90843	0.363651	0.761659	no
Glyma01g36101	Glyma01g36101	Glyma01g36101	Gm01:48579414-48580534	byo-15-0	byo-15-14	NOTEST	0	0	0	0	1	1	no
Glyma01g36110	Glyma01g36110	Glyma01g36110	Gm01:48584816-48588333	byo-15-0	byo-15-14	OK	6.9595	10.7124	0.622231	-1.10146	0.270696	0.673083	no
Glyma01g36120	Glyma01g36120	Glyma01g36120	Gm01:48599418-48603933	byo-15-0	byo-15-14	OK	6.1902	2.8686	-1.10964	1.74169	0.0815624	0.367099	no
Glyma01g36130	Glyma01g36130	Glyma01g36130	Gm01:48622283-48624709	byo-15-0	byo-15-14	NOTEST	0	0.0140936	1.79769e+308	1.79769e+308	0.210186	1	no
Glyma01g36145	Glyma01g36145	Glyma01g36145	Gm01:48632045-48636339	byo-15-0	byo-15-14	OK	1.80934	2.25718	0.319061	-0.443581	0.657345	0.92244	no
Glyma01g36160	Glyma01g36160	Glyma01g36160	Gm01:48651554-48653174	byo-15-0	byo-15-14	OK	4.13842	7.21667	0.802252	-1.34763	0.177778	0.554762	no
Glyma01g36170	Glyma01g36170	Glyma01g36170	Gm01:48661585-48668062	byo-15-0	byo-15-14	OK	3.52092	3.18638	-0.144032	0.239035	0.811078	0.96354	no
Glyma01g36180	Glyma01g36180	Glyma01g36180	Gm01:48677503-48687090	byo-15-0	byo-15-14	OK	4.82209	5.16872	0.100146	-0.151883	0.87928	0.978091	no
Glyma01g36190	Glyma01g36190	Glyma01g36190	Gm01:48690497-48697620	byo-15-0	byo-15-14	NOTEST	0	0	0	0	1	1	no
Glyma01g36200	Glyma01g36200	Glyma01g36200	Gm01:48703010-48710116	byo-15-0	byo-15-14	OK	6.74993	5.05164	-0.418122	0.74094	0.45873	0.829756	no
Glyma01g36210	Glyma01g36210	Glyma01g36210	Gm01:48710853-48716254	byo-15-0	byo-15-14	OK	30.0222	11.812	-1.34577	2.02303	0.0430702	0.252573	no
Glyma01g36225	Glyma01g36225	Glyma01g36225	Gm01:48732011-48735191	byo-15-0	byo-15-14	OK	0.768807	0.534346	-0.524847	0.634431	0.5258	0.866192	no
Glyma01g36240	Glyma01g36240	Glyma01g36240	Gm01:48735796-48738228	byo-15-0	byo-15-14	OK	0.744206	0.445467	-0.740382	0.919651	0.357755	0.756713	no
Glyma01g36250	Glyma01g36250	Glyma01g36250	Gm01:48740116-48740919	byo-15-0	byo-15-14	OK	1.03556	0.958579	-0.11144	0.108803	0.913358	0.985196	no
Glyma01g36260	Glyma01g36260	Glyma01g36260	Gm01:48742924-48747330	byo-15-0	byo-15-14	OK	1.24394	0.971686	-0.356349	0.493128	0.621922	0.90986	no
Glyma01g36270	Glyma01g36270	Glyma01g36270	Gm01:48751691-48754081	byo-15-0	byo-15-14	OK	6.07377	4.08203	-0.573307	0.985708	0.324277	0.727419	no
Glyma01g36280	Glyma01g36280	Glyma01g36280	Gm01:48755468-48766262	byo-15-0	byo-15-14	OK	1.53992	1.31093	-0.23226	0.370282	0.711172	0.937593	no
Glyma01g36290	Glyma01g36290	Glyma01g36290	Gm01:48768219-48769858	byo-15-0	byo-15-14	OK	3.3795	3.91632	0.212691	-0.269283	0.787712	0.958681	no
Glyma01g36301	Glyma01g36301	Glyma01g36301	Gm01:48784769-48791019	byo-15-0	byo-15-14	OK	0.421252	1.0634	1.33593	-1.69873	0.0893696	0.387899	no
Glyma01g36311	Glyma01g36311	Glyma01g36311	Gm01:48803722-48809885	byo-15-0	byo-15-14	NOTEST	0	0.02292	1.79769e+308	1.79769e+308	0.210186	1	no
Glyma01g36320	Glyma01g36320	Glyma01g36320	Gm01:48810062-48812413	byo-15-0	byo-15-14	OK	5.42205	5.00836	-0.1145	0.163676	0.869986	0.976318	no
Glyma01g36330	Glyma01g36330	Glyma01g36330	Gm01:48812789-48816606	byo-15-0	byo-15-14	NOTEST	0	0	0	0	1	1	no
Glyma01g36340	Glyma01g36340	Glyma01g36340	Gm01:48817174-48822812	byo-15-0	byo-15-14	OK	4.73535	5.28524	0.158497	-0.276341	0.782286	0.9573	no
Glyma01g36350	Glyma01g36350	Glyma01g36350	Gm01:48822940-48825606	byo-15-0	byo-15-14	OK	0.321855	1.39431	2.11507	-2.6657	0.00768279	0.0844344	no
Glyma01g36360	Glyma01g36360	Glyma01g36360	Gm01:48830588-48836103	byo-15-0	byo-15-14	OK	0.142358	0.545334	1.93762	-1.92297	0.0544841	0.288622	no
Glyma01g36375	Glyma01g36375	Glyma01g36375	Gm01:48848060-48848643	byo-15-0	byo-15-14	NOTEST	0	0	0	0	1	1	no
Glyma01g36390	Glyma01g36390	Glyma01g36390	Gm01:48865791-48875859	byo-15-0	byo-15-14	OK	2.12563	1.37935	-0.6239	0.945551	0.344378	0.746267	no
Glyma01g36410	Glyma01g36410	Glyma01g36410	Gm01:48903092-48909719	byo-15-0	byo-15-14	OK	21.1324	19.1239	-0.144075	0.245097	0.806382	0.962416	no
Glyma01g36420	Glyma01g36420	Glyma01g36420	Gm01:48925196-48933027	byo-15-0	byo-15-14	OK	0.999227	3.3531	1.74661	-2.19789	0.0279567	0.192815	no
Glyma01g36430	Glyma01g36430	Glyma01g36430	Gm01:48939588-48943055	byo-15-0	byo-15-14	OK	0.824142	0.158612	-2.37739	2.51766	0.0118138	0.111787	no
Glyma01g36440	Glyma01g36440	Glyma01g36440	Gm01:48945635-48947617	byo-15-0	byo-15-14	OK	10.8641	15.4121	0.504497	-0.893001	0.371856	0.768429	no
Glyma01g36450	Glyma01g36450	Glyma01g36450	Gm01:48961667-48971891	byo-15-0	byo-15-14	OK	4.34686	3.28302	-0.404952	0.713447	0.475569	0.837879	no
Glyma01g36460	Glyma01g36460	Glyma01g36460	Gm01:48974134-48978029	byo-15-0	byo-15-14	NOTEST	0	0	0	0	1	1	no
Glyma01g36480	Glyma01g36480	Glyma01g36480	Gm01:48987938-48990441	byo-15-0	byo-15-14	OK	21.2763	1.56804	-3.76222	5.44128	5.29e-08	7.35333e-06	yes
Glyma01g36490	Glyma01g36490	Glyma01g36490	Gm01:48994357-48995257	byo-15-0	byo-15-14	NOTEST	0	0	0	0	1	1	no
Glyma01g36500	Glyma01g36500	Glyma01g36500	Gm01:48997060-49003679	byo-15-0	byo-15-14	OK	0.578139	0.329867	-0.80953	0.989385	0.322475	0.726684	no
Glyma01g36510	Glyma01g36510	Glyma01g36510	Gm01:49007099-49008173	byo-15-0	byo-15-14	NOTEST	0.0907042	0	-1.79769e+308	-1.79769e+308	0.108187	1	no
Glyma01g36520	Glyma01g36520	Glyma01g36520	Gm01:49010426-49011305	byo-15-0	byo-15-14	NOTEST	0	0	0	0	1	1	no
Glyma01g36530	Glyma01g36530	Glyma01g36530	Gm01:49013986-49014688	byo-15-0	byo-15-14	NOTEST	0	0	0	0	1	1	no
Glyma01g36545	Glyma01g36545	Glyma01g36545	Gm01:49022248-49027494	byo-15-0	byo-15-14	NOTEST	0	0	0	0	1	1	no
Glyma01g36560	Glyma01g36560	Glyma01g36560	Gm01:49029694-49030771	byo-15-0	byo-15-14	NOTEST	0	0.0653471	1.79769e+308	1.79769e+308	0.127239	1	no
Glyma01g36570	Glyma01g36570	Glyma01g36570	Gm01:49038832-49039771	byo-15-0	byo-15-14	OK	0.74955	0	-1.79769e+308	-1.79769e+308	0.014551	0.127891	no
Glyma01g36580	Glyma01g36580	Glyma01g36580	Gm01:49043808-49044992	byo-15-0	byo-15-14	NOTEST	0	0	0	0	1	1	no
Glyma01g36590	Glyma01g36590	Glyma01g36590	Gm01:49051914-49056921	byo-15-0	byo-15-14	OK	0.575323	0.172581	-1.7371	1.88083	0.0599946	0.306484	no
Glyma01g36600	Glyma01g36600	Glyma01g36600	Gm01:49064175-49066310	byo-15-0	byo-15-14	OK	1.61819	5.88357	1.86231	-2.66889	0.0076102	0.0840366	no
Glyma01g36606	Glyma01g36606	Glyma01g36606	Gm01:49068914-49070036	byo-15-0	byo-15-14	OK	0.850435	1.0624	0.321054	-0.377926	0.705486	0.935755	no
Glyma01g36613	Glyma01g36613	Glyma01g36613	Gm01:49070073-49072214	byo-15-0	byo-15-14	OK	0.440277	0.945386	1.10249	-1.1937	0.232597	0.628865	no
Glyma01g36620	Glyma01g36620	Glyma01g36620	Gm01:49074667-49077300	byo-15-0	byo-15-14	OK	159.599	57.9705	-1.46106	2.31229	0.0207618	0.159741	no
Glyma01g36630	Glyma01g36630	Glyma01g36630	Gm01:49084944-49093758	byo-15-0	byo-15-14	OK	2.25714	2.20563	-0.0333016	0.047257	0.962308	0.994028	no
Glyma01g36638	Glyma01g36638	Glyma01g36638	Gm01:49107386-49109822	byo-15-0	byo-15-14	OK	4.98461	13.288	1.41457	-2.24212	0.0249538	0.178964	no
Glyma01g36646	Glyma01g36646	Glyma01g36646	Gm01:49109982-49111565	byo-15-0	byo-15-14	OK	2.67493	6.14232	1.19928	-1.46986	0.1416	0.492902	no
Glyma01g36654	Glyma01g36654	Glyma01g36654	Gm01:49113570-49119201	byo-15-0	byo-15-14	OK	2.29924	2.61147	0.183702	-0.131826	0.895122	0.981898	no
Glyma01g36662	Glyma01g36662	Glyma01g36662	Gm01:49119339-49122865	byo-15-0	byo-15-14	OK	26.0859	15.9318	-0.711362	1.22493	0.220603	0.612918	no
Glyma01g36670	Glyma01g36670	Glyma01g36670	Gm01:49124364-49127508	byo-15-0	byo-15-14	OK	8.20992	9.91284	0.27193	-0.389684	0.69677	0.932952	no
Glyma01g36680	Glyma01g36680	Glyma01g36680	Gm01:49129327-49137766	byo-15-0	byo-15-14	OK	3.58105	3.04441	-0.234222	0.39014	0.696433	0.93284	no
Glyma01g36691	Glyma01g36691	Glyma01g36691	Gm01:49144740-49145859	byo-15-0	byo-15-14	NOTEST	0.172818	0.207348	0.262806	-0.168574	0.866132	1	no
Glyma01g36700	Glyma01g36700	Glyma01g36700	Gm01:49146933-49155639	byo-15-0	byo-15-14	OK	7.83674	7.49266	-0.0647767	0.101034	0.919523	0.986646	no
Glyma01g36711	Glyma01g36711	Glyma01g36711	Gm01:49159187-49159524	byo-15-0	byo-15-14	OK	2.05872	0.49734	-2.04945	1.03074	0.302664	0.707265	no
Glyma01g36720	Glyma01g36720	Glyma01g36720	Gm01:49164706-49167830	byo-15-0	byo-15-14	OK	1.78665	0.489304	-1.86846	2.07479	0.0380061	0.232957	no
Glyma01g36730	Glyma01g36730	Glyma01g36730	Gm01:49171301-49172211	byo-15-0	byo-15-14	OK	1.96028	0.180966	-3.43727	3.24821	0.00116132	0.0222429	yes
Glyma01g36740	Glyma01g36740	Glyma01g36740	Gm01:49175886-49179312	byo-15-0	byo-15-14	OK	18.4957	12.522	-0.562719	0.998575	0.318001	0.722403	no
Glyma01g36750	Glyma01g36750	Glyma01g36750	Gm01:49180569-49188788	byo-15-0	byo-15-14	OK	8.1254	19.1922	1.24001	-2.11738	0.0342278	0.218308	no
Glyma01g36760	Glyma01g36760	Glyma01g36760	Gm01:49196842-49199569	byo-15-0	byo-15-14	OK	3.87326	3.62919	-0.0938983	0.120563	0.904037	0.983199	no
Glyma01g36770	Glyma01g36770	Glyma01g36770	Gm01:49207142-49211246	byo-15-0	byo-15-14	OK	4.87133	6.85754	0.493375	-0.795674	0.426222	0.808398	no
Glyma01g36780	Glyma01g36780	Glyma01g36780	Gm01:49213870-49215923	byo-15-0	byo-15-14	OK	10.0868	5.14067	-0.972441	1.48078	0.138665	0.487951	no
Glyma01g36790	Glyma01g36790	Glyma01g36790	Gm01:49215924-49218539	byo-15-0	byo-15-14	OK	6.30038	3.17269	-0.989732	1.20947	0.226481	0.620871	no
Glyma01g36801	Glyma01g36801	Glyma01g36801	Gm01:49220679-49225998	byo-15-0	byo-15-14	OK	4.12661	3.55445	-0.215331	0.370651	0.710898	0.937549	no
Glyma01g36810	Glyma01g36810	Glyma01g36810	Gm01:49235149-49235590	byo-15-0	byo-15-14	NOTEST	0.314111	0	-1.79769e+308	-1.79769e+308	0.108187	1	no
Glyma01g36820	Glyma01g36820	Glyma01g36820	Gm01:49253297-49254542	byo-15-0	byo-15-14	NOTEST	0	0.116502	1.79769e+308	1.79769e+308	0.0814107	1	no
Glyma01g36831	Glyma01g36831	Glyma01g36831	Gm01:49256521-49258723	byo-15-0	byo-15-14	OK	2.0465	1.73228	-0.240482	0.325783	0.744589	0.946235	no
Glyma01g36840	Glyma01g36840	Glyma01g36840	Gm01:49263069-49265363	byo-15-0	byo-15-14	OK	2.11319	6.49938	1.62088	-2.67715	0.00742521	0.0825856	no
Glyma01g36850	Glyma01g36850	Glyma01g36850	Gm01:49266433-49268941	byo-15-0	byo-15-14	OK	84.5104	67.0451	-0.333998	0.542619	0.587392	0.894916	no
Glyma01g36860	Glyma01g36860	Glyma01g36860	Gm01:49271742-49278414	byo-15-0	byo-15-14	OK	2.00274	7.30727	1.86736	-2.93427	0.00334338	0.0481054	yes
Glyma01g36870	Glyma01g36870	Glyma01g36870	Gm01:49289720-49299050	byo-15-0	byo-15-14	OK	6.45933	5.33597	-0.275635	0.488875	0.62493	0.910891	no
Glyma01g36880	Glyma01g36880	Glyma01g36880	Gm01:49300170-49302868	byo-15-0	byo-15-14	OK	14.3522	18.0758	0.332783	-0.520135	0.60297	0.902547	no
Glyma01g36890	Glyma01g36890	Glyma01g36890	Gm01:49306067-49309782	byo-15-0	byo-15-14	OK	63.4167	42.4212	-0.580076	0.932701	0.350975	0.751214	no
Glyma01g36900	Glyma01g36900	Glyma01g36900	Gm01:49311611-49314379	byo-15-0	byo-15-14	NOTEST	0.153654	0.0818114	-0.909311	0.638202	0.523342	1	no
Glyma01g36920	Glyma01g36920	Glyma01g36920	Gm01:49322909-49327222	byo-15-0	byo-15-14	NOTEST	0	0.0117768	1.79769e+308	1.79769e+308	0.210186	1	no
Glyma01g36931	Glyma01g36931	Glyma01g36931	Gm01:49327330-49331955	byo-15-0	byo-15-14	NOTEST	0.118318	0.148049	0.32341	-0.207447	0.83566	1	no
Glyma01g36940	Glyma01g36940	Glyma01g36940	Gm01:49334742-49338803	byo-15-0	byo-15-14	OK	0.142032	1.04303	2.87649	-2.74988	0.00596164	0.0712493	no
Glyma01g36950	Glyma01g36950	Glyma01g36950	Gm01:49340202-49347954	byo-15-0	byo-15-14	OK	0.479986	0.19253	-1.31791	1.60798	0.107839	0.429195	no
Glyma01g36960	Glyma01g36960	Glyma01g36960	Gm01:49357372-49363143	byo-15-0	byo-15-14	OK	3.32455	2.70713	-0.296398	0.480771	0.630679	0.913117	no
Glyma01g36980	Glyma01g36980	Glyma01g36980	Gm01:49366425-49374835	byo-15-0	byo-15-14	NOTEST	0.0242075	0	-1.79769e+308	-1.79769e+308	0.108187	1	no
Glyma01g36990	Glyma01g36990	Glyma01g36990	Gm01:49378227-49384148	byo-15-0	byo-15-14	OK	12.5756	11.0351	-0.18852	0.335293	0.737404	0.944689	no
Glyma01g37000	Glyma01g37000	Glyma01g37000	Gm01:49386620-49392224	byo-15-0	byo-15-14	NOTEST	0.379676	0.299105	-0.344113	0.362284	0.71714	1	no
Glyma01g37010	Glyma01g37010	Glyma01g37010	Gm01:49392804-49394717	byo-15-0	byo-15-14	OK	14.9019	6.13256	-1.28094	2.15332	0.0312934	0.206285	no
Glyma01g37020	Glyma01g37020	Glyma01g37020	Gm01:49402192-49404630	byo-15-0	byo-15-14	OK	12.5937	15.7177	0.319696	-0.567539	0.570348	0.888465	no
Glyma01g37031	Glyma01g37031	Glyma01g37031	Gm01:49405105-49407262	byo-15-0	byo-15-14	NOTEST	0	0	0	0	1	1	no
Glyma01g37040	Glyma01g37040	Glyma01g37040	Gm01:49421021-49423263	byo-15-0	byo-15-14	OK	0.263625	0.628949	1.25446	-1.35823	0.17439	0.549243	no
Glyma01g37051	Glyma01g37051	Glyma01g37051	Gm01:49432478-49435070	byo-15-0	byo-15-14	NOTEST	0	0	0	0	1	1	no
Glyma01g37060	Glyma01g37060	Glyma01g37060	Gm01:49439171-49440019	byo-15-0	byo-15-14	NOTEST	0	0	0	0	1	1	no
Glyma01g37080	Glyma01g37080	Glyma01g37080	Gm01:49455121-49457778	byo-15-0	byo-15-14	OK	2.89845	1.06365	-1.44626	2.2401	0.0250842	0.179655	no
Glyma01g37090	Glyma01g37090	Glyma01g37090	Gm01:49471613-49473084	byo-15-0	byo-15-14	OK	6.23227	4.88898	-0.350226	0.57378	0.566116	0.88709	no
Glyma01g37100	Glyma01g37100	Glyma01g37100	Gm01:49482623-49488331	byo-15-0	byo-15-14	OK	2.47998	1.84733	-0.42489	0.604869	0.545266	0.877127	no
Glyma01g37120	Glyma01g37120	Glyma01g37120	Gm01:49513343-49516212	byo-15-0	byo-15-14	NOTEST	0	0	0	0	1	1	no
Glyma01g37130	Glyma01g37130	Glyma01g37130	Gm01:49518056-49520062	byo-15-0	byo-15-14	NOTEST	0.124251	0.0749798	-0.728684	0.54068	0.588728	1	no
Glyma01g37136	Glyma01g37136	Glyma01g37136	Gm01:49520615-49552178	byo-15-0	byo-15-14	OK	2.71417	2.63112	-0.0448329	0.078326	0.937569	0.989765	no
Glyma01g37143	Glyma01g37143	Glyma01g37143	Gm01:49520615-49552178	byo-15-0	byo-15-14	NOTEST	0	0	0	0	1	1	no
Glyma01g37150	Glyma01g37150	Glyma01g37150	Gm01:49557207-49558582	byo-15-0	byo-15-14	NOTEST	0.208318	0.178762	-0.220743	0.193059	0.846913	1	no
Glyma01g37160	Glyma01g37160	Glyma01g37160	Gm01:49559523-49562407	byo-15-0	byo-15-14	OK	4.08158	6.04483	0.566574	-0.885576	0.375846	0.771218	no
Glyma01g37180	Glyma01g37180	Glyma01g37180	Gm01:49563492-49567476	byo-15-0	byo-15-14	OK	5.4932	4.9067	-0.162895	0.272653	0.78512	0.958155	no
Glyma01g37190	Glyma01g37190	Glyma01g37190	Gm01:49585069-49586870	byo-15-0	byo-15-14	NOTEST	0	0	0	0	1	1	no
Glyma01g37200	Glyma01g37200	Glyma01g37200	Gm01:49597448-49598567	byo-15-0	byo-15-14	OK	0.637056	0.166477	-1.9361	1.53716	0.124254	0.461719	no
Glyma01g37215	Glyma01g37215	Glyma01g37215	Gm01:49610632-49612072	byo-15-0	byo-15-14	NOTEST	0	0.0259043	1.79769e+308	1.79769e+308	0.25808	1	no
Glyma01g37230	Glyma01g37230	Glyma01g37230	Gm01:49610632-49612072	byo-15-0	byo-15-14	NOTEST	0	0	0	0	1	1	no
Glyma01g37240	Glyma01g37240	Glyma01g37240	Gm01:49616496-49621295	byo-15-0	byo-15-14	OK	0.128223	0.497887	1.95716	-2.09182	0.0364548	0.226665	no
Glyma01g37250	Glyma01g37250	Glyma01g37250	Gm01:49624839-49626433	byo-15-0	byo-15-14	OK	85.5424	104.906	0.29438	-0.451656	0.651517	0.920652	no
Glyma01g37270	Glyma01g37270	Glyma01g37270	Gm01:49637622-49639519	byo-15-0	byo-15-14	OK	38.7994	54.4396	0.488621	-0.775464	0.438066	0.817003	no
Glyma01g37290	Glyma01g37290	Glyma01g37290	Gm01:49639992-49643961	byo-15-0	byo-15-14	OK	6.77833	6.3424	-0.0959026	0.120047	0.904446	0.983224	no
Glyma01g37296	Glyma01g37296	Glyma01g37296	Gm01:49646115-49646903	byo-15-0	byo-15-14	OK	89.2518	44.8361	-0.993222	1.65187	0.0985607	0.40999	no
Glyma01g37303	Glyma01g37303	Glyma01g37303	Gm01:49646973-49647556	byo-15-0	byo-15-14	NOTEST	0	0.130167	1.79769e+308	1.79769e+308	0.210186	1	no
Glyma01g37310	Glyma01g37310	Glyma01g37310	Gm01:49651805-49656854	byo-15-0	byo-15-14	OK	0.182724	0.464144	1.3449	-1.2741	0.20263	0.59039	no
Glyma01g37320	Glyma01g37320	Glyma01g37320	Gm01:49680382-49682445	byo-15-0	byo-15-14	OK	29.0197	17.9669	-0.691689	1.22515	0.220519	0.612886	no
Glyma01g37330	Glyma01g37330	Glyma01g37330	Gm01:49688213-49691604	byo-15-0	byo-15-14	NOTEST	0.0506264	0.0762115	0.59012	-0.501992	0.615673	1	no
Glyma01g37341	Glyma01g37341	Glyma01g37341	Gm01:49698283-49706430	byo-15-0	byo-15-14	OK	8.77876	5.07821	-0.789695	1.30963	0.19032	0.572752	no
Glyma01g37350	Glyma01g37350	Glyma01g37350	Gm01:49711599-49713520	byo-15-0	byo-15-14	NOTEST	0	0	0	0	1	1	no
Glyma01g37360	Glyma01g37360	Glyma01g37360	Gm01:49721188-49723541	byo-15-0	byo-15-14	OK	4.05586	42.3203	3.38327	-5.32462	1.01162e-07	1.29503e-05	yes
Glyma01g37370	Glyma01g37370	Glyma01g37370	Gm01:49725132-49728656	byo-15-0	byo-15-14	OK	35.5893	3.07487	-3.53285	5.68268	1.32598e-08	2.23674e-06	yes
Glyma01g37380	Glyma01g37380	Glyma01g37380	Gm01:49736248-49744811	byo-15-0	byo-15-14	OK	4.64235	2.19093	-1.08331	1.67612	0.0937143	0.399056	no
Glyma01g37393	Glyma01g37393	Glyma01g37393	Gm01:49755262-49762118	byo-15-0	byo-15-14	OK	5.49025	3.82846	-0.520109	0.923347	0.355826	0.754913	no
Glyma01g37406	Glyma01g37406	Glyma01g37406	Gm01:49766181-49770448	byo-15-0	byo-15-14	OK	3.56581	4.68358	0.393384	-0.656544	0.511474	0.857216	no
Glyma01g37420	Glyma01g37420	Glyma01g37420	Gm01:49772165-49778547	byo-15-0	byo-15-14	OK	1.20359	1.15937	-0.0540121	0.0791589	0.936906	0.989636	no
Glyma01g37430	Glyma01g37430	Glyma01g37430	Gm01:49781351-49784822	byo-15-0	byo-15-14	OK	0.258348	1.02798	1.99243	-2.38147	0.0172437	0.142399	no
Glyma01g37440	Glyma01g37440	Glyma01g37440	Gm01:49804689-49806831	byo-15-0	byo-15-14	NOTEST	0	0	0	0	1	1	no
Glyma01g37450	Glyma01g37450	Glyma01g37450	Gm01:49804689-49806831	byo-15-0	byo-15-14	OK	1.49269	7.78355	2.38251	-3.7022	0.000213735	0.00653678	yes
Glyma01g37460	Glyma01g37460	Glyma01g37460	Gm01:49816977-49818918	byo-15-0	byo-15-14	OK	7.00177	12.0163	0.779197	-1.37843	0.168069	0.538207	no
Glyma01g37470	Glyma01g37470	Glyma01g37470	Gm01:49821773-49824393	byo-15-0	byo-15-14	NOTEST	0	0.0280892	1.79769e+308	1.79769e+308	0.35129	1	no
Glyma01g37480	Glyma01g37480	Glyma01g37480	Gm01:49830529-49834966	byo-15-0	byo-15-14	OK	18.9003	17.7812	-0.088058	0.155752	0.876229	0.977735	no
Glyma01g37490	Glyma01g37490	Glyma01g37490	Gm01:49841544-49848877	byo-15-0	byo-15-14	OK	9.61885	5.30425	-0.858715	1.3874	0.165321	0.534107	no
Glyma01g37500	Glyma01g37500	Glyma01g37500	Gm01:49850120-49854265	byo-15-0	byo-15-14	OK	16.4039	19.363	0.239264	-0.408243	0.683095	0.92938	no
Glyma01g37510	Glyma01g37510	Glyma01g37510	Gm01:49858452-49865847	byo-15-0	byo-15-14	OK	0.50812	0.394396	-0.365526	0.417537	0.676286	0.928549	no
Glyma01g37520	Glyma01g37520	Glyma01g37520	Gm01:49869523-49871376	byo-15-0	byo-15-14	OK	2.25772	2.85478	0.338517	-0.518113	0.604379	0.903099	no
Glyma01g37530	Glyma01g37530	Glyma01g37530	Gm01:49872196-49872388	byo-15-0	byo-15-14	NOTEST	0	0	0	0	1	1	no
Glyma01g37541	Glyma01g37541	Glyma01g37541	Gm01:49879281-49885195	byo-15-0	byo-15-14	OK	27.8034	45.3995	0.707411	-1.07637	0.28176	0.684626	no
Glyma01g37550	Glyma01g37550	Glyma01g37550	Gm01:49885628-49888995	byo-15-0	byo-15-14	OK	186.717	74.1675	-1.33199	2.09973	0.035753	0.223719	no
Glyma01g37560	Glyma01g37560	Glyma01g37560	Gm01:49891280-49893312	byo-15-0	byo-15-14	OK	7.78653	6.57771	-0.243396	0.341883	0.732439	0.943168	no
Glyma01g37571	Glyma01g37571	Glyma01g37571	Gm01:49893933-49905366	byo-15-0	byo-15-14	NOTEST	0	0	0	0	1	1	no
Glyma01g37580	Glyma01g37580	Glyma01g37580	Gm01:49893933-49905366	byo-15-0	byo-15-14	OK	16.8738	14.5487	-0.213896	0.344934	0.730144	0.942789	no
Glyma01g37590	Glyma01g37590	Glyma01g37590	Gm01:49909450-49916251	byo-15-0	byo-15-14	OK	1.40072	0.763962	-0.874598	1.13525	0.256269	0.657718	no
Glyma01g37600	Glyma01g37600	Glyma01g37600	Gm01:49942124-49946080	byo-15-0	byo-15-14	NOTEST	0	0	0	0	1	1	no
Glyma01g37610	Glyma01g37610	Glyma01g37610	Gm01:49946274-49947782	byo-15-0	byo-15-14	OK	7.87887	7.28362	-0.113334	0.178962	0.857967	0.973743	no
Glyma01g37620	Glyma01g37620	Glyma01g37620	Gm01:49949013-49952809	byo-15-0	byo-15-14	OK	1.69508	0.684623	-1.30797	1.73135	0.0833899	0.372102	no
Glyma01g37630	Glyma01g37630	Glyma01g37630	Gm01:49953469-49956749	byo-15-0	byo-15-14	NOTEST	0.0519955	0.0425258	-0.290047	0.168451	0.866228	1	no
Glyma01g37640	Glyma01g37640	Glyma01g37640	Gm01:49963812-49969112	byo-15-0	byo-15-14	NOTEST	0.10304	0.0284372	-1.85735	1.24245	0.21407	1	no
Glyma01g37650	Glyma01g37650	Glyma01g37650	Gm01:49975720-49977560	byo-15-0	byo-15-14	NOTEST	0.405577	0.0187689	-4.43356	2.32874	0.0198728	1	no
Glyma01g37670	Glyma01g37670	Glyma01g37670	Gm01:49982520-49986256	byo-15-0	byo-15-14	OK	2.53626	2.50853	-0.0158631	0.0253988	0.979737	0.996606	no
Glyma01g37675	Glyma01g37675	Glyma01g37675	Gm01:49992409-49993063	byo-15-0	byo-15-14	NOTEST	0	0	0	0	1	1	no
Glyma01g37680	Glyma01g37680	Glyma01g37680	Gm01:49999698-50001148	byo-15-0	byo-15-14	NOTEST	0	0	0	0	1	1	no
Glyma01g37690	Glyma01g37690	Glyma01g37690	Gm01:50011031-50012116	byo-15-0	byo-15-14	NOTEST	0	0.11255	1.79769e+308	1.79769e+308	0.0814107	1	no
Glyma01g37710	Glyma01g37710	Glyma01g37710	Gm01:50023553-50027805	byo-15-0	byo-15-14	OK	20.9466	9.60004	-1.1256	1.98275	0.0473952	0.267009	no
Glyma01g37720	Glyma01g37720	Glyma01g37720	Gm01:50028224-50031144	byo-15-0	byo-15-14	OK	4.86389	27.595	2.50423	-4.16349	3.13425e-05	0.00148627	yes
Glyma01g37730	Glyma01g37730	Glyma01g37730	Gm01:50039747-50044012	byo-15-0	byo-15-14	OK	4.43736	7.62469	0.780978	-1.36155	0.173339	0.547893	no
Glyma01g37750	Glyma01g37750	Glyma01g37750	Gm01:50051364-50051706	byo-15-0	byo-15-14	NOTEST	0	0.268728	1.79769e+308	1.79769e+308	0.210186	1	no
Glyma01g37760	Glyma01g37760	Glyma01g37760	Gm01:50053788-50061598	byo-15-0	byo-15-14	OK	1.07933	1.94787	0.851758	-1.37938	0.167779	0.537648	no
Glyma01g37780	Glyma01g37780	Glyma01g37780	Gm01:50066372-50070574	byo-15-0	byo-15-14	OK	21.0552	12.2004	-0.78725	1.39312	0.163584	0.531302	no
Glyma01g37790	Glyma01g37790	Glyma01g37790	Gm01:50071761-50075271	byo-15-0	byo-15-14	OK	18.7939	20.1005	0.0969698	-0.168321	0.866331	0.975413	no
Glyma01g37801	Glyma01g37801	Glyma01g37801	Gm01:50076638-50080885	byo-15-0	byo-15-14	NOTEST	0	0.0137308	1.79769e+308	1.79769e+308	0.210186	1	no
Glyma01g37810	Glyma01g37810	Glyma01g37810	Gm01:50095935-50098278	byo-15-0	byo-15-14	OK	1.47629	4.03778	1.45159	-2.11175	0.0347076	0.220043	no
Glyma01g37820	Glyma01g37820	Glyma01g37820	Gm01:50121728-50127532	byo-15-0	byo-15-14	NOTEST	0	0.0209262	1.79769e+308	1.79769e+308	0.210186	1	no
Glyma01g37840	Glyma01g37840	Glyma01g37840	Gm01:50130998-50133253	byo-15-0	byo-15-14	NOTEST	0	0.0293555	1.79769e+308	1.79769e+308	0.210186	1	no
Glyma01g37850	Glyma01g37850	Glyma01g37850	Gm01:50135076-50137305	byo-15-0	byo-15-14	OK	0.563604	0.383197	-0.556598	0.589051	0.555827	0.882414	no
Glyma01g37860	Glyma01g37860	Glyma01g37860	Gm01:50141791-50144442	byo-15-0	byo-15-14	OK	2.1846	1.93774	-0.172999	0.252572	0.800599	0.96176	no
Glyma01g37870	Glyma01g37870	Glyma01g37870	Gm01:50146983-50150059	byo-15-0	byo-15-14	OK	31.0299	14.2468	-1.12303	1.91126	0.0559711	0.293893	no
Glyma01g37880	Glyma01g37880	Glyma01g37880	Gm01:50151986-50153270	byo-15-0	byo-15-14	NOTEST	0	0.0555409	1.79769e+308	1.79769e+308	0.127239	1	no
Glyma01g37890	Glyma01g37890	Glyma01g37890	Gm01:50153494-50155300	byo-15-0	byo-15-14	OK	2.97386	3.05588	0.0392512	-0.0609027	0.951437	0.993003	no
Glyma01g37900	Glyma01g37900	Glyma01g37900	Gm01:50155332-50163097	byo-15-0	byo-15-14	OK	249.586	95.218	-1.39023	1.89233	0.0584465	0.301572	no
Glyma01g37910	Glyma01g37910	Glyma01g37910	Gm01:50155332-50163097	byo-15-0	byo-15-14	OK	6.0322	3.16893	-0.92869	0.302477	0.762289	0.951774	no
Glyma01g37920	Glyma01g37920	Glyma01g37920	Gm01:50155332-50163097	byo-15-0	byo-15-14	NOTEST	0.174052	0.0746468	-1.22136	0.0547815	0.956313	1	no
Glyma01g37930	Glyma01g37930	Glyma01g37930	Gm01:50166501-50169549	byo-15-0	byo-15-14	OK	0.852873	1.70816	1.00204	-1.37127	0.170289	0.542636	no
Glyma01g37940	Glyma01g37940	Glyma01g37940	Gm01:50177417-50180805	byo-15-0	byo-15-14	OK	7.74736	5.49501	-0.495583	0.867262	0.385799	0.779187	no
Glyma01g37950	Glyma01g37950	Glyma01g37950	Gm01:50182416-50188946	byo-15-0	byo-15-14	OK	2.43351	0.206906	-3.55599	4.47686	7.57492e-06	0.000469095	yes
Glyma01g37961	Glyma01g37961	Glyma01g37961	Gm01:50206805-50209153	byo-15-0	byo-15-14	NOTEST	0	0	0	0	1	1	no
Glyma01g37970	Glyma01g37970	Glyma01g37970	Gm01:50210431-50216350	byo-15-0	byo-15-14	OK	0.946433	2.75305	1.54046	-2.29299	0.0218484	0.165604	no
Glyma01g37980	Glyma01g37980	Glyma01g37980	Gm01:50217118-50219743	byo-15-0	byo-15-14	NOTEST	0	0	0	0	1	1	no
Glyma01g37993	Glyma01g37993	Glyma01g37993	Gm01:50222810-50223758	byo-15-0	byo-15-14	OK	0.888151	0.264588	-1.74706	1.73225	0.0832292	0.371862	no
Glyma01g38006	Glyma01g38006	Glyma01g38006	Gm01:50230283-50235022	byo-15-0	byo-15-14	NOTEST	0	0	0	0	1	1	no
Glyma01g38020	Glyma01g38020	Glyma01g38020	Gm01:50230283-50235022	byo-15-0	byo-15-14	LOWDATA	0	0	0	0	1	1	no
Glyma01g38040	Glyma01g38040	Glyma01g38040	Gm01:50244376-50247091	byo-15-0	byo-15-14	NOTEST	0	0	0	0	1	1	no
Glyma01g38050	Glyma01g38050	Glyma01g38050	Gm01:50251094-50252088	byo-15-0	byo-15-14	NOTEST	0	0	0	0	1	1	no
Glyma01g38060	Glyma01g38060	Glyma01g38060	Gm01:50253664-50255929	byo-15-0	byo-15-14	NOTEST	0	0	0	0	1	1	no
Glyma01g38070	Glyma01g38070	Glyma01g38070	Gm01:50257294-50261107	byo-15-0	byo-15-14	OK	6.27939	6.74934	0.104121	-0.165454	0.868586	0.976113	no
Glyma01g38080	Glyma01g38080	Glyma01g38080	Gm01:50257294-50261107	byo-15-0	byo-15-14	OK	0.241715	1.07654	2.15503	-0.126043	0.899697	0.982292	no
Glyma01g38090	Glyma01g38090	Glyma01g38090	Gm01:50261440-50263777	byo-15-0	byo-15-14	OK	3.15685	4.58316	0.537857	-0.877937	0.379978	0.774736	no
Glyma01g38105	Glyma01g38105	Glyma01g38105	Gm01:50271874-50276395	byo-15-0	byo-15-14	NOTEST	0.0612319	0.209075	1.77167	-1.40347	0.160476	1	no
Glyma01g38120	Glyma01g38120	Glyma01g38120	Gm01:50277040-50282069	byo-15-0	byo-15-14	OK	16.7054	19.7596	0.242237	-0.417306	0.676455	0.928662	no
Glyma01g38130	Glyma01g38130	Glyma01g38130	Gm01:50286808-50291347	byo-15-0	byo-15-14	OK	1.33533	17.0491	3.67442	-5.58734	2.30578e-08	3.53931e-06	yes
Glyma01g38150	Glyma01g38150	Glyma01g38150	Gm01:50297901-50304459	byo-15-0	byo-15-14	OK	1.21171	0.522728	-1.21291	1.64493	0.0999835	0.413288	no
Glyma01g38165	Glyma01g38165	Glyma01g38165	Gm01:50306261-50309677	byo-15-0	byo-15-14	OK	2.99964	3.087	0.0414155	-0.0557751	0.955521	0.99348	no
Glyma01g38180	Glyma01g38180	Glyma01g38180	Gm01:50334433-50339882	byo-15-0	byo-15-14	OK	1.62282	3.03092	0.901254	-1.30837	0.190748	0.573413	no
Glyma01g38190	Glyma01g38190	Glyma01g38190	Gm01:50334433-50339882	byo-15-0	byo-15-14	OK	0.743468	1.01034	0.442503	-0.196915	0.843894	0.969995	no
Glyma01g38200	Glyma01g38200	Glyma01g38200	Gm01:50344732-50351525	byo-15-0	byo-15-14	OK	24.8811	19.1396	-0.378489	0.638896	0.522891	0.86416	no
Glyma01g38211	Glyma01g38211	Glyma01g38211	Gm01:50359266-50363158	byo-15-0	byo-15-14	OK	312.064	158.473	-0.97761	0.786427	0.431617	0.812485	no
Glyma01g38220	Glyma01g38220	Glyma01g38220	Gm01:50366968-50368330	byo-15-0	byo-15-14	OK	1.64311	0.301767	-2.44492	2.64898	0.00807362	0.0871919	no
Glyma01g38230	Glyma01g38230	Glyma01g38230	Gm01:50369093-50373219	byo-15-0	byo-15-14	OK	10.4498	6.24706	-0.742223	1.23035	0.218567	0.61084	no
Glyma01g38240	Glyma01g38240	Glyma01g38240	Gm01:50382617-50389821	byo-15-0	byo-15-14	OK	3.83388	2.23965	-0.775536	1.31775	0.187587	0.568874	no
Glyma01g38250	Glyma01g38250	Glyma01g38250	Gm01:50392826-50393355	byo-15-0	byo-15-14	NOTEST	0	0	0	0	1	1	no
Glyma01g38260	Glyma01g38260	Glyma01g38260	Gm01:50394489-50396439	byo-15-0	byo-15-14	OK	1.58627	2.37897	0.584701	-0.723827	0.469172	0.833968	no
Glyma01g38270	Glyma01g38270	Glyma01g38270	Gm01:50396914-50399570	byo-15-0	byo-15-14	OK	2.11419	2.11725	0.00208684	-0.00278913	0.997775	0.999719	no
Glyma01g38280	Glyma01g38280	Glyma01g38280	Gm01:50400416-50410022	byo-15-0	byo-15-14	OK	0.346454	1.65893	2.25952	-3.11167	0.00186032	0.0316657	yes
Glyma01g38285	Glyma01g38285	Glyma01g38285	Gm01:50429282-50431539	byo-15-0	byo-15-14	NOTEST	0	0	0	0	1	1	no
Glyma01g38290	Glyma01g38290	Glyma01g38290	Gm01:50444755-50448681	byo-15-0	byo-15-14	OK	8.20897	6.84733	-0.26166	0.464369	0.642384	0.917948	no
Glyma01g38305	Glyma01g38305	Glyma01g38305	Gm01:50449917-50454973	byo-15-0	byo-15-14	OK	2.20635	1.8263	-0.272734	0.438341	0.661139	0.923886	no
Glyma01g38320	Glyma01g38320	Glyma01g38320	Gm01:50456603-50460237	byo-15-0	byo-15-14	OK	16.4799	16.8456	0.0316697	-0.0524969	0.958133	0.993815	no
Glyma01g38330	Glyma01g38330	Glyma01g38330	Gm01:50462526-50464658	byo-15-0	byo-15-14	OK	2.87574	3.00825	0.0649917	-0.0817597	0.934838	0.98962	no
Glyma01g38340	Glyma01g38340	Glyma01g38340	Gm01:50465731-50468463	byo-15-0	byo-15-14	NOTEST	0	0.0213154	1.79769e+308	1.79769e+308	0.127239	1	no
Glyma01g38350	Glyma01g38350	Glyma01g38350	Gm01:50468718-50471279	byo-15-0	byo-15-14	OK	0.132971	0.491327	1.88557	-1.72704	0.0841599	0.37406	no
Glyma01g38360	Glyma01g38360	Glyma01g38360	Gm01:50481849-50484062	byo-15-0	byo-15-14	OK	6.10899	8.0216	0.392956	-0.695619	0.486667	0.845316	no
Glyma01g38370	Glyma01g38370	Glyma01g38370	Gm01:50487836-50491942	byo-15-0	byo-15-14	OK	13.2975	9.14307	-0.540406	0.907059	0.364375	0.762312	no
Glyma01g38381	Glyma01g38381	Glyma01g38381	Gm01:50492109-50499655	byo-15-0	byo-15-14	NOTEST	0.0413239	0.218004	2.3993	-1.26417	0.206168	1	no
Glyma01g38390	Glyma01g38390	Glyma01g38390	Gm01:50502781-50505172	byo-15-0	byo-15-14	NOTEST	0	0.0647819	1.79769e+308	1.79769e+308	0.127239	1	no
Glyma01g38400	Glyma01g38400	Glyma01g38400	Gm01:50522426-50525037	byo-15-0	byo-15-14	OK	3.05164	2.65769	-0.199415	0.312532	0.754636	0.94973	no
Glyma01g38410	Glyma01g38410	Glyma01g38410	Gm01:50528621-50536566	byo-15-0	byo-15-14	OK	17.1266	7.76252	-1.14165	1.79659	0.072401	0.344386	no
Glyma01g38430	Glyma01g38430	Glyma01g38430	Gm01:50543383-50544862	byo-15-0	byo-15-14	NOTEST	0	0	0	0	1	1	no
Glyma01g38450	Glyma01g38450	Glyma01g38450	Gm01:50549840-50551564	byo-15-0	byo-15-14	OK	20.0242	22.8899	0.192973	-0.33317	0.739006	0.945041	no
Glyma01g38460	Glyma01g38460	Glyma01g38460	Gm01:50559469-50563981	byo-15-0	byo-15-14	OK	2.64011	2.79978	0.084715	-0.131588	0.89531	0.981898	no
Glyma01g38470	Glyma01g38470	Glyma01g38470	Gm01:50564247-50567428	byo-15-0	byo-15-14	OK	57.3296	48.8075	-0.232179	0.367924	0.71293	0.937909	no
Glyma01g38481	Glyma01g38481	Glyma01g38481	Gm01:50571005-50572016	byo-15-0	byo-15-14	NOTEST	0.307228	0.0761755	-2.01191	1.36683	0.171679	1	no
Glyma01g38490	Glyma01g38490	Glyma01g38490	Gm01:50575585-50578085	byo-15-0	byo-15-14	OK	1.0689	0.909427	-0.233091	0.267877	0.788794	0.95914	no
Glyma01g38500	Glyma01g38500	Glyma01g38500	Gm01:50580026-50582631	byo-15-0	byo-15-14	OK	3.95033	0.292027	-3.7578	4.575	4.76223e-06	0.000320664	yes
Glyma01g38510	Glyma01g38510	Glyma01g38510	Gm01:50585499-50587165	byo-15-0	byo-15-14	OK	8.72496	5.37	-0.700228	1.16239	0.245076	0.644144	no
Glyma01g38520	Glyma01g38520	Glyma01g38520	Gm01:50595299-50597560	byo-15-0	byo-15-14	OK	1.28415	1.57287	0.292579	-0.413609	0.679161	0.928911	no
Glyma01g38530	Glyma01g38530	Glyma01g38530	Gm01:50601604-50607434	byo-15-0	byo-15-14	NOTEST	0	0	0	0	1	1	no
Glyma01g38540	Glyma01g38540	Glyma01g38540	Gm01:50612385-50613848	byo-15-0	byo-15-14	NOTEST	0	0	0	0	1	1	no
Glyma01g38550	Glyma01g38550	Glyma01g38550	Gm01:50621610-50624263	byo-15-0	byo-15-14	NOTEST	0	0	0	0	1	1	no
Glyma01g38560	Glyma01g38560	Glyma01g38560	Gm01:50625695-50629374	byo-15-0	byo-15-14	NOTEST	0.175175	0.199164	0.185159	-0.202343	0.839648	1	no
Glyma01g38570	Glyma01g38570	Glyma01g38570	Gm01:50630573-50632809	byo-15-0	byo-15-14	OK	0.292365	0.620343	1.08529	-1.18113	0.237553	0.634827	no
Glyma01g38580	Glyma01g38580	Glyma01g38580	Gm01:50633743-50644902	byo-15-0	byo-15-14	OK	0.618511	1.22483	0.985708	-1.32316	0.185781	0.566686	no
Glyma01g38590	Glyma01g38590	Glyma01g38590	Gm01:50645459-50648060	byo-15-0	byo-15-14	OK	17.7161	1.3698	-3.69302	5.70539	1.16075e-08	1.98454e-06	yes
Glyma01g38600	Glyma01g38600	Glyma01g38600	Gm01:50652785-50654854	byo-15-0	byo-15-14	OK	1.44692	0.131167	-3.46351	3.655	0.000257177	0.00747037	yes
Glyma01g38610	Glyma01g38610	Glyma01g38610	Gm01:50657110-50660265	byo-15-0	byo-15-14	NOTEST	0	0.0181349	1.79769e+308	1.79769e+308	0.210186	1	no
Glyma01g38630	Glyma01g38630	Glyma01g38630	Gm01:50667181-50669294	byo-15-0	byo-15-14	NOTEST	0	0.0768287	1.79769e+308	1.79769e+308	0.0535835	1	no
Glyma01g38640	Glyma01g38640	Glyma01g38640	Gm01:50682059-50689940	byo-15-0	byo-15-14	OK	7.64006	6.38671	-0.258511	0.454727	0.649306	0.920146	no
Glyma01g38650	Glyma01g38650	Glyma01g38650	Gm01:50714207-50721679	byo-15-0	byo-15-14	OK	21.7501	18.576	-0.227587	0.370379	0.7111	0.937593	no
Glyma01g38660	Glyma01g38660	Glyma01g38660	Gm01:50733266-50737661	byo-15-0	byo-15-14	OK	0.676961	0.334994	-1.01494	1.21981	0.222539	0.615206	no
Glyma01g38671	Glyma01g38671	Glyma01g38671	Gm01:50746604-50760836	byo-15-0	byo-15-14	OK	1.26552	1.08548	-0.221395	0.343242	0.731417	0.942879	no
Glyma01g38680	Glyma01g38680	Glyma01g38680	Gm01:50767560-50772744	byo-15-0	byo-15-14	OK	1.31001	1.92851	0.557909	-0.848833	0.395974	0.786145	no
Glyma01g38683	Glyma01g38683	Glyma01g38683	Gm01:50776465-50776986	byo-15-0	byo-15-14	NOTEST	0	0	0	0	1	1	no
Glyma01g38686	Glyma01g38686	Glyma01g38686	Gm01:50778421-50779180	byo-15-0	byo-15-14	NOTEST	0	0	0	0	1	1	no
Glyma01g38690	Glyma01g38690	Glyma01g38690	Gm01:50779484-50780771	byo-15-0	byo-15-14	OK	0.116808	1.46047	3.64422	-3.5663	0.000362058	0.00961176	yes
Glyma01g38710	Glyma01g38710	Glyma01g38710	Gm01:50784350-50784782	byo-15-0	byo-15-14	OK	0.797358	0.623559	-0.354702	0.304061	0.761081	0.951313	no
Glyma01g38720	Glyma01g38720	Glyma01g38720	Gm01:50799865-50800659	byo-15-0	byo-15-14	OK	0.100236	0.875643	3.12694	-2.32671	0.0199805	0.155947	no
Glyma01g38730	Glyma01g38730	Glyma01g38730	Gm01:50805196-50807200	byo-15-0	byo-15-14	OK	0.0920405	0.493879	2.42382	-2.27896	0.0226695	0.169059	no
Glyma01g38740	Glyma01g38740	Glyma01g38740	Gm01:50808925-50811172	byo-15-0	byo-15-14	OK	1.78773	1.49964	-0.253514	0.300756	0.763601	0.952181	no
Glyma01g38750	Glyma01g38750	Glyma01g38750	Gm01:50813274-50815197	byo-15-0	byo-15-14	OK	1208.9	653.42	-0.887617	0.804553	0.421078	0.805703	no
Glyma01g38760	Glyma01g38760	Glyma01g38760	Gm01:50816662-50817396	byo-15-0	byo-15-14	OK	0.84567	0	-1.79769e+308	-1.79769e+308	0.0476234	0.267086	no
Glyma01g38770	Glyma01g38770	Glyma01g38770	Gm01:50817872-50819939	byo-15-0	byo-15-14	OK	4.69346	4.95152	0.0772188	-0.116083	0.907587	0.984194	no
Glyma01g38780	Glyma01g38780	Glyma01g38780	Gm01:50823650-50825788	byo-15-0	byo-15-14	NOTEST	0	0.020307	1.79769e+308	1.79769e+308	0.210186	1	no
Glyma01g38800	Glyma01g38800	Glyma01g38800	Gm01:50835383-50838753	byo-15-0	byo-15-14	OK	8.18551	12.1258	0.566941	-1.00556	0.314626	0.719299	no
Glyma01g38830	Glyma01g38830	Glyma01g38830	Gm01:50842944-50844670	byo-15-0	byo-15-14	NOTEST	0	0	0	0	1	1	no
Glyma01g38840	Glyma01g38840	Glyma01g38840	Gm01:50846296-50851361	byo-15-0	byo-15-14	OK	2.62051	4.38252	0.741913	-1.21155	0.225685	0.619815	no
Glyma01g38850	Glyma01g38850	Glyma01g38850	Gm01:50852873-50855077	byo-15-0	byo-15-14	NOTEST	0	0.0246258	1.79769e+308	1.79769e+308	0.210186	1	no
Glyma01g38860	Glyma01g38860	Glyma01g38860	Gm01:50858802-50861902	byo-15-0	byo-15-14	NOTEST	0.046874	0.0206418	-1.18322	0.553633	0.57983	1	no
Glyma01g38870	Glyma01g38870	Glyma01g38870	Gm01:50865163-50867505	byo-15-0	byo-15-14	NOTEST	0.0363262	0	-1.79769e+308	-1.79769e+308	0.108187	1	no
Glyma01g38880	Glyma01g38880	Glyma01g38880	Gm01:50879358-50885115	byo-15-0	byo-15-14	OK	2.7287	1.04319	-1.38722	1.98517	0.0471256	0.266185	no
Glyma01g38890	Glyma01g38890	Glyma01g38890	Gm01:50885116-50891376	byo-15-0	byo-15-14	OK	2.34426	3.03378	0.371982	-0.635225	0.525282	0.865616	no
Glyma01g38900	Glyma01g38900	Glyma01g38900	Gm01:50896720-50898557	byo-15-0	byo-15-14	NOTEST	0	0.124874	1.79769e+308	1.79769e+308	0.0350186	1	no
Glyma01g38905	Glyma01g38905	Glyma01g38905	Gm01:50904042-50904806	byo-15-0	byo-15-14	NOTEST	0	0	0	0	1	1	no
Glyma01g38910	Glyma01g38910	Glyma01g38910	Gm01:50905481-50907657	byo-15-0	byo-15-14	OK	1.83813	3.2365	0.816193	-1.12451	0.260797	0.662227	no
Glyma01g38920	Glyma01g38920	Glyma01g38920	Gm01:50914354-50920765	byo-15-0	byo-15-14	OK	0.756751	1.0267	0.440127	-0.59798	0.549854	0.879483	no
Glyma01g38930	Glyma01g38930	Glyma01g38930	Gm01:50921917-50923972	byo-15-0	byo-15-14	OK	77.4291	104.649	0.434617	-0.681467	0.495576	0.849975	no
Glyma01g38940	Glyma01g38940	Glyma01g38940	Gm01:50926261-50927303	byo-15-0	byo-15-14	OK	271.467	163.332	-0.732967	1.03837	0.299098	0.703429	no
Glyma01g38950	Glyma01g38950	Glyma01g38950	Gm01:50927363-50936118	byo-15-0	byo-15-14	OK	16.31	15.5301	-0.070694	0.123086	0.902039	0.982818	no
Glyma01g38970	Glyma01g38970	Glyma01g38970	Gm01:50951026-50952807	byo-15-0	byo-15-14	OK	0.392706	0.833621	1.08594	-1.23877	0.215432	0.606543	no
Glyma01g38980	Glyma01g38980	Glyma01g38980	Gm01:50956636-50960580	byo-15-0	byo-15-14	OK	1.41324	9.57163	2.75976	-4.35117	1.35415e-05	0.000757482	yes
Glyma01g38990	Glyma01g38990	Glyma01g38990	Gm01:50965004-50966084	byo-15-0	byo-15-14	NOTEST	0.151127	0.128787	-0.230771	0.134025	0.893383	1	no
Glyma01g39000	Glyma01g39000	Glyma01g39000	Gm01:50968054-50971842	byo-15-0	byo-15-14	OK	0.621339	0.876405	0.496218	-0.663785	0.506828	0.855802	no
Glyma01g39010	Glyma01g39010	Glyma01g39010	Gm01:50973225-50978011	byo-15-0	byo-15-14	OK	0.908835	1.2946	0.510416	-0.748729	0.45402	0.82704	no
Glyma01g39020	Glyma01g39020	Glyma01g39020	Gm01:50978689-50990291	byo-15-0	byo-15-14	OK	3.90519	2.7123	-0.525877	0.802682	0.422158	0.806458	no
Glyma01g39030	Glyma01g39030	Glyma01g39030	Gm01:50993362-50998484	byo-15-0	byo-15-14	OK	7.86539	6.07344	-0.373004	0.561706	0.574317	0.890133	no
Glyma01g39040	Glyma01g39040	Glyma01g39040	Gm01:51015839-51018131	byo-15-0	byo-15-14	OK	1.65054	1.33492	-0.30618	0.428351	0.668396	0.926118	no
Glyma01g39050	Glyma01g39050	Glyma01g39050	Gm01:51020378-51026936	byo-15-0	byo-15-14	OK	2.28626	2.60856	0.190259	-0.298984	0.764952	0.952547	no
Glyma01g39060	Glyma01g39060	Glyma01g39060	Gm01:51032159-51036122	byo-15-0	byo-15-14	NOTEST	0	0.0181385	1.79769e+308	1.79769e+308	0.317638	1	no
Glyma01g39071	Glyma01g39071	Glyma01g39071	Gm01:51054324-51059649	byo-15-0	byo-15-14	NOTEST	0	0.0129932	1.79769e+308	1.79769e+308	0.32146	1	no
Glyma01g39080	Glyma01g39080	Glyma01g39080	Gm01:51065275-51067178	byo-15-0	byo-15-14	NOTEST	0	0	0	0	1	1	no
Glyma01g39090	Glyma01g39090	Glyma01g39090	Gm01:51073678-51079219	byo-15-0	byo-15-14	OK	1.81618	0.922196	-0.977766	1.43203	0.152136	0.511671	no
Glyma01g39100	Glyma01g39100	Glyma01g39100	Gm01:51080529-51083731	byo-15-0	byo-15-14	OK	1.78638	1.18581	-0.59116	0.832149	0.405325	0.792749	no
Glyma01g39110	Glyma01g39110	Glyma01g39110	Gm01:51090471-51105666	byo-15-0	byo-15-14	OK	0.520379	0.397478	-0.388686	0.45846	0.646622	0.919205	no
Glyma01g39120	Glyma01g39120	Glyma01g39120	Gm01:51105888-51110702	byo-15-0	byo-15-14	OK	17.5789	39.8805	1.18184	-1.40759	0.159253	0.524363	no
Glyma01g39141	Glyma01g39141	Glyma01g39141	Gm01:51125197-51131131	byo-15-0	byo-15-14	OK	3.10379	1.90237	-0.706235	1.20235	0.229226	0.624884	no
Glyma01g39160	Glyma01g39160	Glyma01g39160	Gm01:51146769-51147427	byo-15-0	byo-15-14	NOTEST	0	0	0	0	1	1	no
Glyma01g39170	Glyma01g39170	Glyma01g39170	Gm01:51153265-51154075	byo-15-0	byo-15-14	NOTEST	0	0	0	0	1	1	no
Glyma01g39180	Glyma01g39180	Glyma01g39180	Gm01:51160065-51160350	byo-15-0	byo-15-14	NOTEST	0	0	0	0	1	1	no
Glyma01g39190	Glyma01g39190	Glyma01g39190	Gm01:51164315-51168296	byo-15-0	byo-15-14	OK	0.747761	1.27496	0.769806	-0.778284	0.436401	0.815919	no
Glyma01g39200	Glyma01g39200	Glyma01g39200	Gm01:51176939-51182827	byo-15-0	byo-15-14	OK	91.9125	42.7934	-1.10287	1.73948	0.0819508	0.368182	no
Glyma01g39220	Glyma01g39220	Glyma01g39220	Gm01:51195447-51198098	byo-15-0	byo-15-14	OK	1.57213	4.04611	1.36381	-2.0951	0.0361623	0.225682	no
Glyma01g39230	Glyma01g39230	Glyma01g39230	Gm01:51207026-51208664	byo-15-0	byo-15-14	NOTEST	0	0.270367	1.79769e+308	1.79769e+308	0.0284177	1	no
Glyma01g39240	Glyma01g39240	Glyma01g39240	Gm01:51218796-51220209	byo-15-0	byo-15-14	OK	12.054	7.58132	-0.668995	1.1539	0.248542	0.647975	no
Glyma01g39250	Glyma01g39250	Glyma01g39250	Gm01:51223239-51226456	byo-15-0	byo-15-14	OK	10.9778	5.97525	-0.877523	1.09354	0.274156	0.676742	no
Glyma01g39260	Glyma01g39260	Glyma01g39260	Gm01:51227462-51229777	byo-15-0	byo-15-14	OK	2.07777	1.22232	-0.765412	1.07489	0.282425	0.685438	no
Glyma01g39270	Glyma01g39270	Glyma01g39270	Gm01:51234092-51236207	byo-15-0	byo-15-14	OK	54.499	48.3409	-0.172986	0.276401	0.78224	0.9573	no
Glyma01g39280	Glyma01g39280	Glyma01g39280	Gm01:51241780-51246700	byo-15-0	byo-15-14	OK	15.0329	15.7127	0.0638104	-0.111604	0.911137	0.984747	no
Glyma01g39290	Glyma01g39290	Glyma01g39290	Gm01:51259529-51261619	byo-15-0	byo-15-14	OK	3.92524	3.1065	-0.337493	0.556957	0.577557	0.891437	no
Glyma01g39300	Glyma01g39300	Glyma01g39300	Gm01:51273336-51279506	byo-15-0	byo-15-14	OK	1.85838	0	-1.79769e+308	-1.79769e+308	0.139927	0.489664	no
Glyma01g39306	Glyma01g39306	Glyma01g39306	Gm01:51273336-51279506	byo-15-0	byo-15-14	NOTEST	0	0	0	0	1	1	no
Glyma01g39313	Glyma01g39313	Glyma01g39313	Gm01:51280851-51284021	byo-15-0	byo-15-14	NOTEST	0.197565	0.040307	-2.29323	1.15334	0.24877	1	no
Glyma01g39320	Glyma01g39320	Glyma01g39320	Gm01:51287475-51290552	byo-15-0	byo-15-14	OK	4.56516	4.09413	-0.15711	0.260861	0.794199	0.960561	no
Glyma01g39330	Glyma01g39330	Glyma01g39330	Gm01:51290922-51295650	byo-15-0	byo-15-14	OK	11.9765	10.7095	-0.16132	0.286576	0.774437	0.955054	no
Glyma01g39340	Glyma01g39340	Glyma01g39340	Gm01:51296877-51297857	byo-15-0	byo-15-14	NOTEST	0	0.114644	1.79769e+308	1.79769e+308	0.127239	1	no
Glyma01g39350	Glyma01g39350	Glyma01g39350	Gm01:51298441-51305321	byo-15-0	byo-15-14	OK	20.4246	27.1452	0.410387	-0.712262	0.476303	0.83848	no
Glyma01g39360	Glyma01g39360	Glyma01g39360	Gm01:51314677-51315832	byo-15-0	byo-15-14	NOTEST	0	0	0	0	1	1	no
Glyma01g39370	Glyma01g39370	Glyma01g39370	Gm01:51321188-51322374	byo-15-0	byo-15-14	OK	7.20267	24.5643	1.76996	-3.05201	0.00227312	0.0367374	yes
Glyma01g39380	Glyma01g39380	Glyma01g39380	Gm01:51332253-51333769	byo-15-0	byo-15-14	NOTEST	0	0.078984	1.79769e+308	1.79769e+308	0.0658452	1	no
Glyma01g39391	Glyma01g39391	Glyma01g39391	Gm01:51334950-51335823	byo-15-0	byo-15-14	NOTEST	0	0	0	0	1	1	no
Glyma01g39401	Glyma01g39401	Glyma01g39401	Gm01:51345282-51346122	byo-15-0	byo-15-14	NOTEST	0	0	0	0	1	1	no
Glyma01g39410	Glyma01g39410	Glyma01g39410	Gm01:51349990-51355206	byo-15-0	byo-15-14	OK	8.18822	12.211	0.576565	-0.948916	0.342663	0.744694	no
Glyma01g39420	Glyma01g39420	Glyma01g39420	Gm01:51355206-51358366	byo-15-0	byo-15-14	OK	4.52995	5.68497	0.327658	-0.567257	0.57054	0.888652	no
Glyma01g39430	Glyma01g39430	Glyma01g39430	Gm01:51363128-51376630	byo-15-0	byo-15-14	OK	1.05688	1.16678	0.142721	-0.230891	0.817399	0.964953	no
Glyma01g39440	Glyma01g39440	Glyma01g39440	Gm01:51376879-51383234	byo-15-0	byo-15-14	NOTEST	0	0	0	0	1	1	no
Glyma01g39451	Glyma01g39451	Glyma01g39451	Gm01:51385174-51388582	byo-15-0	byo-15-14	NOTEST	0.0462233	0.288019	2.63947	-1.94806	0.0514079	1	no
Glyma01g39460	Glyma01g39460	Glyma01g39460	Gm01:51397147-51399175	byo-15-0	byo-15-14	OK	1.63713	1.53911	-0.0890695	0.112807	0.910184	0.984445	no
Glyma01g39470	Glyma01g39470	Glyma01g39470	Gm01:51403228-51406259	byo-15-0	byo-15-14	OK	1.59213	1.73534	0.124259	-0.154915	0.876889	0.977735	no
Glyma01g39480	Glyma01g39480	Glyma01g39480	Gm01:51407024-51411165	byo-15-0	byo-15-14	NOTEST	0.357532	0.143674	-1.31527	1.32007	0.18681	1	no
Glyma01g39490	Glyma01g39490	Glyma01g39490	Gm01:51412886-51422885	byo-15-0	byo-15-14	OK	1.16067	3.12987	1.43115	-2.27942	0.022642	0.168892	no
Glyma01g39500	Glyma01g39500	Glyma01g39500	Gm01:51428871-51431363	byo-15-0	byo-15-14	OK	124.278	56.1805	-1.14543	1.75341	0.0795322	0.363313	no
Glyma01g39510	Glyma01g39510	Glyma01g39510	Gm01:51431925-51439061	byo-15-0	byo-15-14	OK	1.29938	1.42046	0.128537	-0.193636	0.846461	0.970753	no
Glyma01g39520	Glyma01g39520	Glyma01g39520	Gm01:51456457-51460406	byo-15-0	byo-15-14	OK	2.29961	6.66828	1.53592	-2.19947	0.0278444	0.192369	no
Glyma01g39530	Glyma01g39530	Glyma01g39530	Gm01:51483951-51489283	byo-15-0	byo-15-14	OK	133.458	237.35	0.830626	-1.07286	0.283332	0.686559	no
Glyma01g39540	Glyma01g39540	Glyma01g39540	Gm01:51490230-51491823	byo-15-0	byo-15-14	OK	19.814	13.4959	-0.553997	0.980953	0.326616	0.729648	no
Glyma01g39560	Glyma01g39560	Glyma01g39560	Gm01:51508290-51512259	byo-15-0	byo-15-14	OK	6.30083	6.22502	-0.0174636	0.0291685	0.97673	0.996206	no
Glyma01g39570	Glyma01g39570	Glyma01g39570	Gm01:51516172-51517312	byo-15-0	byo-15-14	OK	1.54457	0.379978	-2.02322	2.2688	0.0232806	0.171679	no
Glyma01g39580	Glyma01g39580	Glyma01g39580	Gm01:51518038-51522362	byo-15-0	byo-15-14	OK	11.573	11.8677	0.0362819	-0.0635843	0.949301	0.993	no
Glyma01g39590	Glyma01g39590	Glyma01g39590	Gm01:51527348-51528891	byo-15-0	byo-15-14	OK	1.42987	0.814574	-0.811768	1.02489	0.305416	0.709118	no
Glyma01g39600	Glyma01g39600	Glyma01g39600	Gm01:51531989-51534998	byo-15-0	byo-15-14	OK	11.2259	4.84436	-1.21246	1.9445	0.051835	0.281258	no
Glyma01g39610	Glyma01g39610	Glyma01g39610	Gm01:51545785-51549819	byo-15-0	byo-15-14	OK	1.90216	1.72467	-0.141319	0.21745	0.827858	0.966173	no
Glyma01g39630	Glyma01g39630	Glyma01g39630	Gm01:51555027-51556605	byo-15-0	byo-15-14	NOTEST	0.162676	0.137385	-0.243776	0.213203	0.831168	1	no
Glyma01g39640	Glyma01g39640	Glyma01g39640	Gm01:51557943-51560354	byo-15-0	byo-15-14	OK	8.13187	8.26928	0.0241751	-0.0404785	0.967712	0.995273	no
Glyma01g39650	Glyma01g39650	Glyma01g39650	Gm01:51565663-51573461	byo-15-0	byo-15-14	OK	3.43085	4.05682	0.241783	-0.408841	0.682656	0.92938	no
Glyma01g39660	Glyma01g39660	Glyma01g39660	Gm01:51574045-51576407	byo-15-0	byo-15-14	OK	1.50356	1.18106	-0.348301	0.502258	0.615486	0.907238	no
Glyma01g39690	Glyma01g39690	Glyma01g39690	Gm01:51579270-51581490	byo-15-0	byo-15-14	OK	0	0.566649	1.79769e+308	1.79769e+308	0.00875565	0.0917431	no
Glyma01g39700	Glyma01g39700	Glyma01g39700	Gm01:51584479-51586969	byo-15-0	byo-15-14	OK	7.55662	5.33025	-0.503538	0.802248	0.42241	0.806523	no
Glyma01g39710	Glyma01g39710	Glyma01g39710	Gm01:51587208-51587971	byo-15-0	byo-15-14	OK	1.99261	1.44676	-0.461831	0.523156	0.600866	0.901324	no
Glyma01g39720	Glyma01g39720	Glyma01g39720	Gm01:51588563-51590809	byo-15-0	byo-15-14	NOTEST	0.28438	0.181226	-0.650034	0.631945	0.527423	1	no
Glyma01g39740	Glyma01g39740	Glyma01g39740	Gm01:51613142-51614901	byo-15-0	byo-15-14	OK	15.6373	10.4492	-0.581606	1.02947	0.303257	0.707778	no
Glyma01g39750	Glyma01g39750	Glyma01g39750	Gm01:51624486-51625983	byo-15-0	byo-15-14	OK	0.756966	0.585205	-0.371286	0.333298	0.738909	0.944987	no
Glyma01g39760	Glyma01g39760	Glyma01g39760	Gm01:51627630-51629200	byo-15-0	byo-15-14	NOTEST	0	0	0	0	1	1	no
Glyma01g39770	Glyma01g39770	Glyma01g39770	Gm01:51633199-51634269	byo-15-0	byo-15-14	OK	7.62254	14.2405	0.901654	-1.46056	0.144137	0.496682	no
Glyma01g39780	Glyma01g39780	Glyma01g39780	Gm01:51645378-51647678	byo-15-0	byo-15-14	NOTEST	0	0.0314561	1.79769e+308	1.79769e+308	0.127239	1	no
Glyma01g39790	Glyma01g39790	Glyma01g39790	Gm01:51653322-51656914	byo-15-0	byo-15-14	OK	36.6264	15.5886	-1.23239	2.10457	0.0353291	0.222024	no
Glyma01g39800	Glyma01g39800	Glyma01g39800	Gm01:51659391-51665037	byo-15-0	byo-15-14	OK	2.22363	1.43864	-0.628217	0.920577	0.357271	0.75634	no
Glyma01g39810	Glyma01g39810	Glyma01g39810	Gm01:51668222-51670161	byo-15-0	byo-15-14	OK	12.7608	45.7019	1.84054	-3.17338	0.00150678	0.0269027	yes
Glyma01g39820	Glyma01g39820	Glyma01g39820	Gm01:51675929-51677501	byo-15-0	byo-15-14	NOTEST	0	0	0	0	1	1	no
Glyma01g39830	Glyma01g39830	Glyma01g39830	Gm01:51679882-51690594	byo-15-0	byo-15-14	OK	2.83105	1.95151	-0.536749	0.905077	0.365424	0.763227	no
Glyma01g39850	Glyma01g39850	Glyma01g39850	Gm01:51698415-51700257	byo-15-0	byo-15-14	OK	9.423	21.6201	1.19811	-2.10311	0.0354562	0.222593	no
Glyma01g39860	Glyma01g39860	Glyma01g39860	Gm01:51704330-51708072	byo-15-0	byo-15-14	OK	0.805263	0.693991	-0.214544	0.254363	0.799215	0.961641	no
Glyma01g39870	Glyma01g39870	Glyma01g39870	Gm01:51714716-51716494	byo-15-0	byo-15-14	NOTEST	0	0.0586255	1.79769e+308	1.79769e+308	0.0814107	1	no
Glyma01g39880	Glyma01g39880	Glyma01g39880	Gm01:51721226-51730602	byo-15-0	byo-15-14	OK	0.774354	0.439685	-0.816522	0.195006	0.845388	0.97049	no
Glyma01g39890	Glyma01g39890	Glyma01g39890	Gm01:51721226-51730602	byo-15-0	byo-15-14	OK	73.4039	10.7264	-2.7747	4.47629	7.59516e-06	0.00046945	yes
Glyma01g39900	Glyma01g39900	Glyma01g39900	Gm01:51730921-51747255	byo-15-0	byo-15-14	NOTEST	0	0.212024	1.79769e+308	1.79769e+308	0.222434	1	no
Glyma01g39910	Glyma01g39910	Glyma01g39910	Gm01:51730921-51747255	byo-15-0	byo-15-14	OK	0.80965	1.30238	0.685778	-0.845388	0.397894	0.787095	no
Glyma01g39920	Glyma01g39920	Glyma01g39920	Gm01:51750715-51754579	byo-15-0	byo-15-14	OK	0.735394	1.02718	0.482093	-0.521477	0.602034	0.902007	no
Glyma01g39935	Glyma01g39935	Glyma01g39935	Gm01:51755461-51757387	byo-15-0	byo-15-14	OK	24.7813	12.9079	-0.940997	1.64982	0.0989797	0.4111	no
Glyma01g39950	Glyma01g39950	Glyma01g39950	Gm01:51758052-51764933	byo-15-0	byo-15-14	OK	6.26305	17.4283	1.47649	-2.56927	0.0101914	0.102065	no
Glyma01g39960	Glyma01g39960	Glyma01g39960	Gm01:51768697-51773656	byo-15-0	byo-15-14	OK	17.7614	22.9982	0.372773	-0.629112	0.529276	0.868047	no
Glyma01g39970	Glyma01g39970	Glyma01g39970	Gm01:51778756-51782898	byo-15-0	byo-15-14	OK	16.9318	3.98571	-2.08683	3.59465	0.000324831	0.00893852	yes
Glyma01g39981	Glyma01g39981	Glyma01g39981	Gm01:51784287-51787179	byo-15-0	byo-15-14	OK	1.23969	0.569596	-1.12197	1.00401	0.315372	0.719989	no
Glyma01g39990	Glyma01g39990	Glyma01g39990	Gm01:51795376-51797766	byo-15-0	byo-15-14	OK	0.677345	4.24658	2.64834	-3.50359	0.00045904	0.0114088	yes
Glyma01g40010	Glyma01g40010	Glyma01g40010	Gm01:51813387-51815770	byo-15-0	byo-15-14	OK	26.0805	7.7872	-1.7438	3.00331	0.00267063	0.0407426	yes
Glyma01g40030	Glyma01g40030	Glyma01g40030	Gm01:51830579-51838128	byo-15-0	byo-15-14	OK	2.73544	2.68035	-0.0293516	0.0118006	0.990585	0.99864	no
Glyma01g40041	Glyma01g40041	Glyma01g40041	Gm01:51830579-51838128	byo-15-0	byo-15-14	OK	1.71255	4.42627	1.36994	-2.10243	0.0355153	0.222791	no
Glyma01g40050	Glyma01g40050	Glyma01g40050	Gm01:51861767-51863943	byo-15-0	byo-15-14	NOTEST	0	0.070818	1.79769e+308	1.79769e+308	0.0535835	1	no
Glyma01g40060	Glyma01g40060	Glyma01g40060	Gm01:51873281-51875272	byo-15-0	byo-15-14	NOTEST	0	0	0	0	1	1	no
Glyma01g40080	Glyma01g40080	Glyma01g40080	Gm01:51889805-51895295	byo-15-0	byo-15-14	OK	2.93827	2.66554	-0.140537	0.242671	0.80826	0.962662	no
Glyma01g40090	Glyma01g40090	Glyma01g40090	Gm01:51899586-51905304	byo-15-0	byo-15-14	OK	3.91559	1.05304	-1.89467	2.08169	0.037371	0.230591	no
Glyma01g40100	Glyma01g40100	Glyma01g40100	Gm01:51910087-51912612	byo-15-0	byo-15-14	NOTEST	0.134248	0.376918	1.48935	-1.45682	0.145165	1	no
Glyma01g40110	Glyma01g40110	Glyma01g40110	Gm01:51918737-51926979	byo-15-0	byo-15-14	NOTEST	0.116676	0.0560227	-1.05842	0.948399	0.342926	1	no
Glyma01g40130	Glyma01g40130	Glyma01g40130	Gm01:51926992-51932894	byo-15-0	byo-15-14	OK	3.48997	6.91638	0.986802	-1.68243	0.0924856	0.39622	no
Glyma01g40140	Glyma01g40140	Glyma01g40140	Gm01:51939465-51943260	byo-15-0	byo-15-14	OK	49.6734	22.883	-1.11819	1.88511	0.059415	0.304291	no
Glyma01g40150	Glyma01g40150	Glyma01g40150	Gm01:51946620-51947536	byo-15-0	byo-15-14	OK	43.2125	55.2264	0.353908	-0.61289	0.539949	0.874205	no
Glyma01g40161	Glyma01g40161	Glyma01g40161	Gm01:51948401-51952638	byo-15-0	byo-15-14	OK	0.515037	1.7539	1.76782	-2.27167	0.0231063	0.170938	no
Glyma01g40170	Glyma01g40170	Glyma01g40170	Gm01:51956944-51961922	byo-15-0	byo-15-14	OK	3.98792	3.80007	-0.0696088	0.118351	0.90579	0.983609	no
Glyma01g40180	Glyma01g40180	Glyma01g40180	Gm01:51965657-51969274	byo-15-0	byo-15-14	OK	2.28044	2.6525	0.218041	-0.344916	0.730157	0.942789	no
Glyma01g40190	Glyma01g40190	Glyma01g40190	Gm01:51969918-51974115	byo-15-0	byo-15-14	OK	1.77822	2.4883	0.484721	-0.745364	0.456051	0.827885	no
[truncated: 52,176 more rows]
