# Supplementary material for: Overexpression of a Cinnamyl Alcohol Dehydrogenase-Coding Gene, GsCAD1, from Wild Soybean Enhances Resistance to Soybean Mosaic Virus
Source: MDPI journal article supplement (doi:10.3390/ijms232315206), 2022-12-02
Supplement: s1 [file s1 › Table S3 Ws82-0D-vs-7D.xlsx]

## Sheet: Sheet1
test_id	gene_id	gene	locus	sample_1	sample_2	status	value_1	value_2	log2(fold_change)	test_stat	p_value	q_value	significant
Glyma0002s50	Glyma0002s50	Glyma0002s50	Gm02:2248-17672	ws82-0	ws82-7	OK	1.12453	1.4913	0.407249	-0.796213	0.425908	0.782723	no
Glyma0003s50	Glyma0003s50	Glyma0003s50	Gm03:8648-28244	ws82-0	ws82-7	OK	3.87682	3.85623	-0.00768378	0.0144487	0.988472	0.99771	no
Glyma0005s50	Glyma0005s50	Glyma0005s50	Gm05:16184-21667	ws82-0	ws82-7	OK	0.692399	0.34284	-1.01407	1.24229	0.214131	0.610102	no
Glyma0006s50	Glyma0006s50	Glyma0006s50	Gm06:1757-15096	ws82-0	ws82-7	OK	4.57804	4.47623	-0.0324456	0.0646173	0.948479	0.988432	no
Glyma0007s50	Glyma0007s50	Glyma0007s50	Gm07:1209-3554	ws82-0	ws82-7	NOTEST	0	0	0	0	1	1	no
Glyma0010s50	Glyma0010s50	Glyma0010s50	Gm10:10493-13224	ws82-0	ws82-7	NOTEST	0.0100638	0.0845436	3.07051	-0.842061	0.399754	1	no
Glyma0011s50	Glyma0011s50	Glyma0011s50	Gm11:1119-5508	ws82-0	ws82-7	NOTEST	0.0541127	0.0485486	-0.156537	0.109396	0.912888	1	no
Glyma0015s50	Glyma0015s50	Glyma0015s50	Gm15:626-2726	ws82-0	ws82-7	OK	0.470311	0.416203	-0.176326	0.205638	0.837074	0.959235	no
Glyma0017s50	Glyma0017s50	Glyma0017s50	Gm17:405-1845	ws82-0	ws82-7	OK	0.801879	1.25487	0.646077	-0.683912	0.494031	0.822573	no
Glyma0018s50	Glyma0018s50	Glyma0018s50	Gm18:2484-40137	ws82-0	ws82-7	OK	2.63591	2.66843	0.0176897	-0.0372061	0.970321	0.993128	no
Glyma0021s00410	Glyma0021s00410	Glyma0021s00410	scaffold_21:663659-664067	ws82-0	ws82-7	NOTEST	0	0	0	0	1	1	no
Glyma0021s00426	Glyma0021s00426	Glyma0021s00426	scaffold_21:684712-690812	ws82-0	ws82-7	OK	1.60428	0.237285	-2.75724	1.5798	0.114152	0.469867	no
Glyma0021s00443	Glyma0021s00443	Glyma0021s00443	scaffold_21:692299-694156	ws82-0	ws82-7	OK	0.528942	0	-1.79769e+308	-1.79769e+308	0.0281209	0.225496	no
Glyma0021s00460	Glyma0021s00460	Glyma0021s00460	scaffold_21:716657-721100	ws82-0	ws82-7	OK	1.44399	0.926598	-0.640046	0.867542	0.385645	0.75734	no
Glyma0022s00200	Glyma0022s00200	Glyma0022s00200	scaffold_22:543542-558386	ws82-0	ws82-7	NOTEST	0	0	0	0	1	1	no
Glyma0022s00273	Glyma0022s00273	Glyma0022s00273	scaffold_22:561854-563467	ws82-0	ws82-7	NOTEST	0	0	0	0	1	1	no
Glyma0022s00346	Glyma0022s00346	Glyma0022s00346	scaffold_22:563726-567494	ws82-0	ws82-7	NOTEST	0	0	0	0	1	1	no
Glyma0022s00420	Glyma0022s00420	Glyma0022s00420	scaffold_22:722866-725638	ws82-0	ws82-7	OK	8.45981	6.37231	-0.408809	0.855225	0.392426	0.761173	no
Glyma0022s00430	Glyma0022s00430	Glyma0022s00430	scaffold_22:728729-731634	ws82-0	ws82-7	NOTEST	0.0693982	0.172552	1.31406	-0.589601	0.555458	1	no
Glyma0022s00443	Glyma0022s00443	Glyma0022s00443	scaffold_22:800491-802362	ws82-0	ws82-7	NOTEST	0	0	0	0	1	1	no
Glyma0022s00456	Glyma0022s00456	Glyma0022s00456	scaffold_22:942964-948274	ws82-0	ws82-7	OK	4.21922	6.02783	0.514663	-0.655175	0.512355	0.83402	no
Glyma0022s00470	Glyma0022s00470	Glyma0022s00470	scaffold_22:942964-948274	ws82-0	ws82-7	OK	0.350751	0.919085	1.38975	-0.395258	0.692652	0.909831	no
Glyma0022s00480	Glyma0022s00480	Glyma0022s00480	scaffold_22:952859-956925	ws82-0	ws82-7	OK	0.691342	0.251043	-1.46146	1.77373	0.0761085	0.384628	no
Glyma0023s00410	Glyma0023s00410	Glyma0023s00410	scaffold_23:476540-479148	ws82-0	ws82-7	OK	6.7293	2.55792	-1.39549	2.59947	0.00933671	0.115461	no
Glyma0023s00515	Glyma0023s00515	Glyma0023s00515	scaffold_23:689759-693471	ws82-0	ws82-7	OK	1.59301	0.629855	-1.33866	1.71603	0.0861564	0.410322	no
Glyma0023s00620	Glyma0023s00620	Glyma0023s00620	scaffold_23:694208-709536	ws82-0	ws82-7	OK	3.89919	3.45627	-0.173961	0.28546	0.775292	0.939945	no
Glyma0023s00670	Glyma0023s00670	Glyma0023s00670	scaffold_23:882926-883789	ws82-0	ws82-7	NOTEST	0	0	0	0	1	1	no
Glyma0024s00230	Glyma0024s00230	Glyma0024s00230	scaffold_24:8124-13007	ws82-0	ws82-7	OK	3.23592	1.68523	-0.941226	1.5514	0.120806	0.480498	no
Glyma0024s00245	Glyma0024s00245	Glyma0024s00245	scaffold_24:191608-197085	ws82-0	ws82-7	NOTEST	0	0	0	0	1	1	no
Glyma0024s00260	Glyma0024s00260	Glyma0024s00260	scaffold_24:201620-211808	ws82-0	ws82-7	OK	3.60256	4.854	0.430151	-0.752839	0.451547	0.799931	no
Glyma0028s00210	Glyma0028s00210	Glyma0028s00210	scaffold_28:233807-247417	ws82-0	ws82-7	OK	18.8823	7.2686	-1.37728	2.7777	0.00547453	0.082731	no
Glyma0028s00260	Glyma0028s00260	Glyma0028s00260	scaffold_28:250538-253655	ws82-0	ws82-7	NOTEST	0	0	0	0	1	1	no
Glyma0041s00210	Glyma0041s00210	Glyma0041s00210	scaffold_41:27189-31640	ws82-0	ws82-7	OK	1.24654	2.93165	1.23378	-2.26382	0.0235849	0.204288	no
Glyma0041s00225	Glyma0041s00225	Glyma0041s00225	scaffold_41:41035-42513	ws82-0	ws82-7	NOTEST	0	0	0	0	1	1	no
Glyma0041s00240	Glyma0041s00240	Glyma0041s00240	scaffold_41:45959-49258	ws82-0	ws82-7	OK	25.152	28.2398	0.167058	-0.353467	0.723738	0.921954	no
Glyma0041s00260	Glyma0041s00260	Glyma0041s00260	scaffold_41:61732-66813	ws82-0	ws82-7	OK	0.788942	1.9421	1.29962	-1.94096	0.0522632	0.31682	no
Glyma0041s00271	Glyma0041s00271	Glyma0041s00271	scaffold_41:70024-73638	ws82-0	ws82-7	OK	2.61658	4.18541	0.677684	-1.24485	0.213188	0.609492	no
Glyma0041s00280	Glyma0041s00280	Glyma0041s00280	scaffold_41:74056-78241	ws82-0	ws82-7	OK	4.44394	4.6863	0.0766094	-0.14035	0.888384	0.973429	no
Glyma0041s00290	Glyma0041s00290	Glyma0041s00290	scaffold_41:85372-94695	ws82-0	ws82-7	OK	3.94056	3.37746	-0.222463	0.429768	0.667364	0.899168	no
Glyma0041s00300	Glyma0041s00300	Glyma0041s00300	scaffold_41:96315-98827	ws82-0	ws82-7	OK	15.7172	15.7689	0.00473971	-0.00985381	0.992138	0.998113	no
Glyma0041s00310	Glyma0041s00310	Glyma0041s00310	scaffold_41:111899-114096	ws82-0	ws82-7	NOTEST	0.151746	0.338406	1.15709	-1.09094	0.275299	1	no
Glyma0041s00331	Glyma0041s00331	Glyma0041s00331	scaffold_41:122453-123227	ws82-0	ws82-7	NOTEST	0	0	0	0	1	1	no
Glyma0041s00350	Glyma0041s00350	Glyma0041s00350	scaffold_41:149673-152360	ws82-0	ws82-7	NOTEST	0.132458	0.0860629	-0.622074	0.521894	0.601744	1	no
Glyma0041s00360	Glyma0041s00360	Glyma0041s00360	scaffold_41:165449-171887	ws82-0	ws82-7	NOTEST	0.0278578	0	-1.79769e+308	-1.79769e+308	0.239956	1	no
Glyma0041s50	Glyma0041s50	Glyma0041s50	scaffold_41:4320-9458	ws82-0	ws82-7	NOTEST	0.137413	0.0895327	-0.61803	0.706663	0.479776	1	no
Glyma0042s100	Glyma0042s100	Glyma0042s100	scaffold_42:281628-284115	ws82-0	ws82-7	OK	0.428485	0.13141	-1.70517	1.13164	0.257784	0.654396	no
Glyma0042s50	Glyma0042s50	Glyma0042s50	scaffold_42:265872-271658	ws82-0	ws82-7	NOTEST	0	0	0	0	1	1	no
Glyma0048s00220	Glyma0048s00220	Glyma0048s00220	scaffold_48:756-13042	ws82-0	ws82-7	NOTEST	0	0.0237663	1.79769e+308	1.79769e+308	0.341546	1	no
Glyma0048s00230	Glyma0048s00230	Glyma0048s00230	scaffold_48:13316-18869	ws82-0	ws82-7	OK	0.314195	4.04603	3.68677	-0.691702	0.489125	0.82031	no
Glyma0048s00240	Glyma0048s00240	Glyma0048s00240	scaffold_48:13316-18869	ws82-0	ws82-7	OK	2.0376	3.1613	0.633648	-1.18379	0.236497	0.6335	no
Glyma0048s00250	Glyma0048s00250	Glyma0048s00250	scaffold_48:24012-27245	ws82-0	ws82-7	OK	30.4972	36.8372	0.272487	-0.57373	0.56615	0.858769	no
Glyma0048s00260	Glyma0048s00260	Glyma0048s00260	scaffold_48:30256-31906	ws82-0	ws82-7	OK	0.528661	0.935545	0.823465	-1.1225	0.26165	0.659093	no
Glyma0048s00270	Glyma0048s00270	Glyma0048s00270	scaffold_48:32191-38154	ws82-0	ws82-7	OK	8.36667	8.72825	0.0610382	-0.127177	0.8988	0.975998	no
Glyma0048s00280	Glyma0048s00280	Glyma0048s00280	scaffold_48:41005-46815	ws82-0	ws82-7	OK	6.2417	2.06617	-1.59498	2.86778	0.00413358	0.0696713	no
Glyma0048s00290	Glyma0048s00290	Glyma0048s00290	scaffold_48:51746-58457	ws82-0	ws82-7	OK	14.9277	10.029	-0.573813	1.15352	0.248698	0.645674	no
Glyma0048s00300	Glyma0048s00300	Glyma0048s00300	scaffold_48:62047-65487	ws82-0	ws82-7	OK	71.292	48.818	-0.546327	0.996488	0.319013	0.710701	no
Glyma0048s00305	Glyma0048s00305	Glyma0048s00305	scaffold_48:62047-65487	ws82-0	ws82-7	OK	6.10759	8.37673	0.455785	-0.279421	0.779922	0.941595	no
Glyma0048s00310	Glyma0048s00310	Glyma0048s00310	scaffold_48:73905-75284	ws82-0	ws82-7	NOTEST	0.107915	0.0772175	-0.482903	0.45343	0.650239	1	no
Glyma0048s00320	Glyma0048s00320	Glyma0048s00320	scaffold_48:78264-89175	ws82-0	ws82-7	OK	1.23637	2.00916	0.70049	-1.10768	0.267999	0.665524	no
Glyma0048s00330	Glyma0048s00330	Glyma0048s00330	scaffold_48:92831-93821	ws82-0	ws82-7	OK	23.0226	14.1197	-0.705349	1.46487	0.142957	0.514241	no
Glyma0048s00340	Glyma0048s00340	Glyma0048s00340	scaffold_48:93959-105291	ws82-0	ws82-7	OK	3.29615	2.9058	-0.181846	0.381867	0.70256	0.914303	no
Glyma0048s00350	Glyma0048s00350	Glyma0048s00350	scaffold_48:115208-118892	ws82-0	ws82-7	NOTEST	0.0348357	0	-1.79769e+308	-1.79769e+308	0.135176	1	no
Glyma0048s50	Glyma0048s50	Glyma0048s50	scaffold_48:756-13042	ws82-0	ws82-7	OK	0.635209	0.789411	0.313545	-0.456282	0.648187	0.891252	no
Glyma0053s100	Glyma0053s100	Glyma0053s100	scaffold_53:40277-44576	ws82-0	ws82-7	NOTEST	0	0	0	0	1	1	no
Glyma0053s150	Glyma0053s150	Glyma0053s150	scaffold_53:60537-64721	ws82-0	ws82-7	NOTEST	0	0	0	0	1	1	no
Glyma0053s200	Glyma0053s200	Glyma0053s200	scaffold_53:96299-97317	ws82-0	ws82-7	NOTEST	0	0	0	0	1	1	no
Glyma0053s50	Glyma0053s50	Glyma0053s50	scaffold_53:1663-6177	ws82-0	ws82-7	NOTEST	0	0	0	0	1	1	no
Glyma0057s100	Glyma0057s100	Glyma0057s100	scaffold_57:113347-115364	ws82-0	ws82-7	OK	0.46389	0.427948	-0.116349	0.102851	0.918082	0.981341	no
Glyma0057s50	Glyma0057s50	Glyma0057s50	scaffold_57:98459-99986	ws82-0	ws82-7	NOTEST	0	0	0	0	1	1	no
Glyma0060s00220	Glyma0060s00220	Glyma0060s00220	scaffold_60:12548-13243	ws82-0	ws82-7	NOTEST	0	0	0	0	1	1	no
Glyma0060s00320	Glyma0060s00320	Glyma0060s00320	scaffold_60:67387-68707	ws82-0	ws82-7	NOTEST	0	0	0	0	1	1	no
Glyma0060s00370	Glyma0060s00370	Glyma0060s00370	scaffold_60:104356-106210	ws82-0	ws82-7	NOTEST	0	0	0	0	1	1	no
Glyma0066s50	Glyma0066s50	Glyma0066s50	scaffold_66:161914-164286	ws82-0	ws82-7	NOTEST	0	0	0	0	1	1	no
Glyma0067s50	Glyma0067s50	Glyma0067s50	scaffold_67:44433-45302	ws82-0	ws82-7	NOTEST	0	0	0	0	1	1	no
Glyma0070s50	Glyma0070s50	Glyma0070s50	scaffold_70:35574-40055	ws82-0	ws82-7	OK	2.50863	1.18537	-1.08156	1.61336	0.106666	0.454069	no
Glyma0079s00200	Glyma0079s00200	Glyma0079s00200	scaffold_79:9482-9737	ws82-0	ws82-7	NOTEST	0	0	0	0	1	1	no
Glyma0079s00210	Glyma0079s00210	Glyma0079s00210	scaffold_79:16304-17051	ws82-0	ws82-7	OK	2.03954	5.65148	1.47038	-2.17694	0.0294852	0.23262	no
Glyma0079s00220	Glyma0079s00220	Glyma0079s00220	scaffold_79:17736-18009	ws82-0	ws82-7	OK	0.442456	0.920643	1.05711	-0.487566	0.625857	0.884336	no
Glyma0079s00230	Glyma0079s00230	Glyma0079s00230	scaffold_79:18723-19596	ws82-0	ws82-7	NOTEST	0.0855769	0.251289	1.55405	-1.02911	0.303427	1	no
Glyma0079s00240	Glyma0079s00240	Glyma0079s00240	scaffold_79:20660-20912	ws82-0	ws82-7	OK	0.626362	3.24726	2.37415	-1.19223	0.233171	0.629275	no
Glyma0079s00250	Glyma0079s00250	Glyma0079s00250	scaffold_79:20961-21240	ws82-0	ws82-7	OK	0.34915	1.93676	2.47172	-1.24122	0.214523	0.610367	no
Glyma0079s00261	Glyma0079s00261	Glyma0079s00261	scaffold_79:22053-22326	ws82-0	ws82-7	NOTEST	0	0	0	0	1	1	no
Glyma0079s00270	Glyma0079s00270	Glyma0079s00270	scaffold_79:25288-26862	ws82-0	ws82-7	NOTEST	0.3368	0.22848	-0.559826	0.624628	0.532215	1	no
Glyma0079s00280	Glyma0079s00280	Glyma0079s00280	scaffold_79:27077-28537	ws82-0	ws82-7	NOTEST	0	0	0	0	1	1	no
Glyma0079s00290	Glyma0079s00290	Glyma0079s00290	scaffold_79:30187-34025	ws82-0	ws82-7	OK	0.130188	0.461802	1.82668	-2.27559	0.0228708	0.200363	no
Glyma0079s00295	Glyma0079s00295	Glyma0079s00295	scaffold_79:54681-55767	ws82-0	ws82-7	NOTEST	0.0557971	0.100451	0.848233	-0.513113	0.607872	1	no
Glyma0079s00300	Glyma0079s00300	Glyma0079s00300	scaffold_79:56320-57461	ws82-0	ws82-7	NOTEST	0	0	0	0	1	1	no
Glyma0079s00311	Glyma0079s00311	Glyma0079s00311	scaffold_79:123336-123591	ws82-0	ws82-7	NOTEST	0	0	0	0	1	1	no
Glyma0079s00320	Glyma0079s00320	Glyma0079s00320	scaffold_79:127744-128017	ws82-0	ws82-7	NOTEST	0	0	0	0	1	1	no
Glyma0079s00330	Glyma0079s00330	Glyma0079s00330	scaffold_79:128776-129055	ws82-0	ws82-7	OK	0.236028	0.779056	1.72277	-0.680246	0.496349	0.824143	no
Glyma0079s00340	Glyma0079s00340	Glyma0079s00340	scaffold_79:161645-161951	ws82-0	ws82-7	NOTEST	0	0	0	0	1	1	no
Glyma0079s00350	Glyma0079s00350	Glyma0079s00350	scaffold_79:164291-164540	ws82-0	ws82-7	NOTEST	0.206813	0.213529	0.0461056	-0.0108896	0.991312	1	no
Glyma0079s00360	Glyma0079s00360	Glyma0079s00360	scaffold_79:165133-166200	ws82-0	ws82-7	OK	0.499646	1.19553	1.25867	-1.52872	0.126334	0.489431	no
Glyma0079s00370	Glyma0079s00370	Glyma0079s00370	scaffold_79:167220-167502	ws82-0	ws82-7	OK	0.41733	0.228237	-0.870653	0.298202	0.765549	0.936651	no
Glyma0080s50	Glyma0080s50	Glyma0080s50	scaffold_80:33970-43733	ws82-0	ws82-7	NOTEST	0	0	0	0	1	1	no
Glyma0084s00210	Glyma0084s00210	Glyma0084s00210	scaffold_84:12274-20446	ws82-0	ws82-7	OK	177.044	106.822	-0.728904	1.42598	0.153873	0.532246	no
Glyma0084s00230	Glyma0084s00230	Glyma0084s00230	scaffold_84:53420-54224	ws82-0	ws82-7	NOTEST	0	0	0	0	1	1	no
Glyma0086s00200	Glyma0086s00200	Glyma0086s00200	scaffold_86:18942-19924	ws82-0	ws82-7	NOTEST	0	0	0	0	1	1	no
Glyma0086s00250	Glyma0086s00250	Glyma0086s00250	scaffold_86:40393-43241	ws82-0	ws82-7	NOTEST	0	0	0	0	1	1	no
Glyma0086s00300	Glyma0086s00300	Glyma0086s00300	scaffold_86:91106-93419	ws82-0	ws82-7	NOTEST	0	0	0	0	1	1	no
Glyma0090s00200	Glyma0090s00200	Glyma0090s00200	scaffold_90:4631-8816	ws82-0	ws82-7	NOTEST	0.27984	0.101233	-1.46693	1.76384	0.0777582	1	no
Glyma0090s00250	Glyma0090s00250	Glyma0090s00250	scaffold_90:22827-24762	ws82-0	ws82-7	OK	0.881451	0.79019	-0.15768	0.217371	0.82792	0.956995	no
Glyma0090s00300	Glyma0090s00300	Glyma0090s00300	scaffold_90:24885-25615	ws82-0	ws82-7	OK	4.37371	4.54973	0.0569227	-0.0810818	0.935377	0.985345	no
Glyma0090s00350	Glyma0090s00350	Glyma0090s00350	scaffold_90:44125-48952	ws82-0	ws82-7	OK	0.653957	0.14295	-2.19368	2.99633	0.00273248	0.0530193	no
Glyma0091s00230	Glyma0091s00230	Glyma0091s00230	scaffold_91:29255-30661	ws82-0	ws82-7	NOTEST	0	0	0	0	1	1	no
Glyma0092s00200	Glyma0092s00200	Glyma0092s00200	scaffold_92:4798-6418	ws82-0	ws82-7	OK	0.780633	0.753754	-0.0505502	0.0673687	0.946288	0.987955	no
Glyma0092s00210	Glyma0092s00210	Glyma0092s00210	scaffold_92:9477-13080	ws82-0	ws82-7	OK	2.17511	3.38002	0.635945	-1.01748	0.308927	0.70166	no
Glyma0092s00230	Glyma0092s00230	Glyma0092s00230	scaffold_92:31216-33044	ws82-0	ws82-7	OK	81.4478	37.7501	-1.10939	2.25992	0.023826	0.205803	no
Glyma0092s00240	Glyma0092s00240	Glyma0092s00240	scaffold_92:54198-55797	ws82-0	ws82-7	OK	28.596	22.142	-0.369025	0.77386	0.439014	0.791921	no
Glyma0096s100	Glyma0096s100	Glyma0096s100	scaffold_96:83938-84651	ws82-0	ws82-7	NOTEST	0	0	0	0	1	1	no
Glyma0096s50	Glyma0096s50	Glyma0096s50	scaffold_96:24926-29013	ws82-0	ws82-7	NOTEST	0	0	0	0	1	1	no
Glyma0101s00200	Glyma0101s00200	Glyma0101s00200	scaffold_101:409-679	ws82-0	ws82-7	NOTEST	0	0	0	0	1	1	no
Glyma0101s00210	Glyma0101s00210	Glyma0101s00210	scaffold_101:1190-2295	ws82-0	ws82-7	NOTEST	0	0	0	0	1	1	no
Glyma0101s00230	Glyma0101s00230	Glyma0101s00230	scaffold_101:16731-19812	ws82-0	ws82-7	NOTEST	0	0	0	0	1	1	no
Glyma0101s00241	Glyma0101s00241	Glyma0101s00241	scaffold_101:20750-20975	ws82-0	ws82-7	NOTEST	0	0	0	0	1	1	no
Glyma0101s00251	Glyma0101s00251	Glyma0101s00251	scaffold_101:42209-42999	ws82-0	ws82-7	NOTEST	0	0	0	0	1	1	no
Glyma0101s00260	Glyma0101s00260	Glyma0101s00260	scaffold_101:49116-50221	ws82-0	ws82-7	NOTEST	0	0	0	0	1	1	no
Glyma0103s100	Glyma0103s100	Glyma0103s100	scaffold_103:35985-36595	ws82-0	ws82-7	OK	0.327962	0.474191	0.531939	-0.513951	0.607286	0.877669	no
Glyma0103s50	Glyma0103s50	Glyma0103s50	scaffold_103:19207-24805	ws82-0	ws82-7	OK	0.308671	0.543168	0.815327	-0.549423	0.582716	0.867056	no
Glyma0120s50	Glyma0120s50	Glyma0120s50	scaffold_120:55294-60491	ws82-0	ws82-7	NOTEST	0.00602761	0	-1.79769e+308	-1.79769e+308	0.442613	1	no
Glyma0121s00200	Glyma0121s00200	Glyma0121s00200	scaffold_121:11730-14225	ws82-0	ws82-7	NOTEST	0	0	0	0	1	1	no
Glyma0121s00230	Glyma0121s00230	Glyma0121s00230	scaffold_121:28095-29760	ws82-0	ws82-7	NOTEST	0	0	0	0	1	1	no
Glyma0121s00240	Glyma0121s00240	Glyma0121s00240	scaffold_121:38140-41744	ws82-0	ws82-7	NOTEST	0.0399392	0.011342	-1.81612	0.597743	0.550011	1	no
Glyma0128s50	Glyma0128s50	Glyma0128s50	scaffold_128:8755-9643	ws82-0	ws82-7	NOTEST	0	0	0	0	1	1	no
Glyma0146s00210	Glyma0146s00210	Glyma0146s00210	scaffold_146:13454-14636	ws82-0	ws82-7	NOTEST	0	0	0	0	1	1	no
Glyma0165s00200	Glyma0165s00200	Glyma0165s00200	scaffold_165:18150-20209	ws82-0	ws82-7	NOTEST	0.0160115	0.0176103	0.137313	-0.0388112	0.969041	1	no
Glyma0165s50	Glyma0165s50	Glyma0165s50	scaffold_165:12356-14234	ws82-0	ws82-7	NOTEST	0	0	0	0	1	1	no
Glyma0169s00200	Glyma0169s00200	Glyma0169s00200	scaffold_169:6036-7668	ws82-0	ws82-7	OK	24.9797	41.3625	0.727571	-1.45823	0.144776	0.517306	no
Glyma0169s00210	Glyma0169s00210	Glyma0169s00210	scaffold_169:10271-14284	ws82-0	ws82-7	OK	81.0419	67.2212	-0.269752	0.540722	0.588699	0.870046	no
Glyma0174s50	Glyma0174s50	Glyma0174s50	scaffold_174:28-832	ws82-0	ws82-7	OK	0.547008	0.321621	-0.766199	0.719435	0.471873	0.81305	no
Glyma0175s50	Glyma0175s50	Glyma0175s50	scaffold_175:15261-16399	ws82-0	ws82-7	NOTEST	0	0	0	0	1	1	no
Glyma0196s00210	Glyma0196s00210	Glyma0196s00210	scaffold_196:12292-15573	ws82-0	ws82-7	NOTEST	0.0939651	0.0334642	-1.48951	1.18681	0.235302	1	no
Glyma0196s130	Glyma0196s130	Glyma0196s130	scaffold_196:9547-9835	ws82-0	ws82-7	NOTEST	0	0	0	0	1	1	no
Glyma0196s50	Glyma0196s50	Glyma0196s50	scaffold_196:6280-7448	ws82-0	ws82-7	NOTEST	0	0	0	0	1	1	no
Glyma01g00210	Glyma01g00210	Glyma01g00210	Gm01:27642-27977	ws82-0	ws82-7	OK	5.29715	5.45481	0.0423118	-0.0346186	0.972384	0.99396	no
Glyma01g00241	Glyma01g00241	Glyma01g00241	Gm01:28504-30546	ws82-0	ws82-7	OK	0.23069	0.995019	2.10877	-2.50982	0.0120791	0.135271	no
Glyma01g00270	Glyma01g00270	Glyma01g00270	Gm01:51480-61502	ws82-0	ws82-7	NOTEST	0.0841037	0.076421	-0.1382	0.1058	0.915741	1	no
Glyma01g00280	Glyma01g00280	Glyma01g00280	Gm01:61964-63428	ws82-0	ws82-7	NOTEST	0	0	0	0	1	1	no
Glyma01g00291	Glyma01g00291	Glyma01g00291	Gm01:69968-71359	ws82-0	ws82-7	OK	0.67073	1.84095	1.45665	-1.86254	0.0625272	0.347092	no
Glyma01g00300	Glyma01g00300	Glyma01g00300	Gm01:90229-96102	ws82-0	ws82-7	OK	3.18832	4.83336	0.60023	-1.20421	0.228508	0.624088	no
Glyma01g00311	Glyma01g00311	Glyma01g00311	Gm01:111565-114809	ws82-0	ws82-7	NOTEST	0	0	0	0	1	1	no
Glyma01g00321	Glyma01g00321	Glyma01g00321	Gm01:116191-128024	ws82-0	ws82-7	OK	3.48392	3.50779	0.009854	-0.019804	0.9842	0.996862	no
Glyma01g00341	Glyma01g00341	Glyma01g00341	Gm01:143352-155722	ws82-0	ws82-7	OK	0.513883	0.159247	-1.69018	1.50298	0.132843	0.499314	no
Glyma01g00361	Glyma01g00361	Glyma01g00361	Gm01:157174-157917	ws82-0	ws82-7	OK	0	0.437068	1.79769e+308	1.79769e+308	0.010892	0.127761	no
Glyma01g00380	Glyma01g00380	Glyma01g00380	Gm01:170678-193544	ws82-0	ws82-7	OK	3.2656	2.54049	-0.362244	0.701332	0.483096	0.817906	no
Glyma01g00400	Glyma01g00400	Glyma01g00400	Gm01:196374-202050	ws82-0	ws82-7	OK	7.6839	6.95429	-0.143936	0.226913	0.820491	0.9542	no
Glyma01g00410	Glyma01g00410	Glyma01g00410	Gm01:205593-226050	ws82-0	ws82-7	OK	12.0716	19.1406	0.665016	-1.30971	0.190296	0.582068	no
Glyma01g00420	Glyma01g00420	Glyma01g00420	Gm01:205593-226050	ws82-0	ws82-7	NOTEST	0.344303	0.230319	-0.580044	0.208846	0.834568	1	no
Glyma01g00430	Glyma01g00430	Glyma01g00430	Gm01:227158-238073	ws82-0	ws82-7	OK	17.0736	12.6397	-0.433803	0.866815	0.386043	0.757546	no
Glyma01g00440	Glyma01g00440	Glyma01g00440	Gm01:244255-244600	ws82-0	ws82-7	NOTEST	0	0	0	0	1	1	no
Glyma01g00450	Glyma01g00450	Glyma01g00450	Gm01:247079-274310	ws82-0	ws82-7	NOTEST	0	0	0	0	1	1	no
Glyma01g00460	Glyma01g00460	Glyma01g00460	Gm01:247079-274310	ws82-0	ws82-7	OK	1.43813	1.23304	-0.221966	0.250964	0.801842	0.949002	no
Glyma01g00470	Glyma01g00470	Glyma01g00470	Gm01:247079-274310	ws82-0	ws82-7	OK	5.77123	5.76048	-0.00268947	0.0046781	0.996267	0.999195	no
Glyma01g00481	Glyma01g00481	Glyma01g00481	Gm01:275569-278576	ws82-0	ws82-7	NOTEST	0	0.105307	1.79769e+308	1.79769e+308	0.014362	1	no
Glyma01g00490	Glyma01g00490	Glyma01g00490	Gm01:281068-285680	ws82-0	ws82-7	NOTEST	0	0	0	0	1	1	no
Glyma01g00500	Glyma01g00500	Glyma01g00500	Gm01:285991-288741	ws82-0	ws82-7	OK	119.347	165.433	0.471077	-0.960459	0.336824	0.724519	no
Glyma01g00510	Glyma01g00510	Glyma01g00510	Gm01:291440-297515	ws82-0	ws82-7	OK	4.92288	2.41988	-1.02457	1.95803	0.0502266	0.310765	no
Glyma01g00520	Glyma01g00520	Glyma01g00520	Gm01:303945-308194	ws82-0	ws82-7	OK	3.46547	4.32005	0.317996	-0.51014	0.609954	0.878671	no
Glyma01g00530	Glyma01g00530	Glyma01g00530	Gm01:318581-323172	ws82-0	ws82-7	NOTEST	0	0.0255002	1.79769e+308	1.79769e+308	0.183103	1	no
Glyma01g00541	Glyma01g00541	Glyma01g00541	Gm01:329083-331923	ws82-0	ws82-7	OK	1.45143	9.58221	2.72288	-4.34184	1.41294e-05	0.00100135	yes
Glyma01g00551	Glyma01g00551	Glyma01g00551	Gm01:333453-334355	ws82-0	ws82-7	NOTEST	0	0	0	0	1	1	no
Glyma01g00560	Glyma01g00560	Glyma01g00560	Gm01:335231-337098	ws82-0	ws82-7	OK	6.66829	3.31846	-1.0068	1.97911	0.0478033	0.302703	no
Glyma01g00570	Glyma01g00570	Glyma01g00570	Gm01:339899-343391	ws82-0	ws82-7	OK	18.7654	24.9781	0.412592	-0.867554	0.385638	0.75734	no
Glyma01g00580	Glyma01g00580	Glyma01g00580	Gm01:344017-344620	ws82-0	ws82-7	NOTEST	0	0	0	0	1	1	no
Glyma01g00590	Glyma01g00590	Glyma01g00590	Gm01:346489-350011	ws82-0	ws82-7	OK	3.71671	7.93145	1.09356	-1.87054	0.0614089	0.343982	no
Glyma01g00600	Glyma01g00600	Glyma01g00600	Gm01:363275-365404	ws82-0	ws82-7	OK	6.47554	11.8624	0.873326	-1.75617	0.07906	0.392441	no
Glyma01g00610	Glyma01g00610	Glyma01g00610	Gm01:369322-375842	ws82-0	ws82-7	OK	8.22441	7.79701	-0.0769913	0.12654	0.899305	0.976161	no
Glyma01g00620	Glyma01g00620	Glyma01g00620	Gm01:369322-375842	ws82-0	ws82-7	NOTEST	0.0738703	0.0902397	0.288767	-0.0553518	0.955858	1	no
Glyma01g00640	Glyma01g00640	Glyma01g00640	Gm01:380015-381810	ws82-0	ws82-7	OK	5.44284	5.36978	-0.0194971	0.0392999	0.968651	0.992629	no
Glyma01g00660	Glyma01g00660	Glyma01g00660	Gm01:384777-386898	ws82-0	ws82-7	NOTEST	0.106538	0	-1.79769e+308	-1.79769e+308	0.135176	1	no
Glyma01g00670	Glyma01g00670	Glyma01g00670	Gm01:387855-391000	ws82-0	ws82-7	OK	0.97329	1.38799	0.512053	-0.798545	0.424554	0.781713	no
Glyma01g00680	Glyma01g00680	Glyma01g00680	Gm01:391564-396978	ws82-0	ws82-7	OK	2.72184	2.17775	-0.321742	0.558266	0.576663	0.864005	no
Glyma01g00690	Glyma01g00690	Glyma01g00690	Gm01:397383-400581	ws82-0	ws82-7	OK	4.48488	5.10583	0.187077	-0.310549	0.756143	0.932956	no
Glyma01g00700	Glyma01g00700	Glyma01g00700	Gm01:411261-413277	ws82-0	ws82-7	NOTEST	0	0	0	0	1	1	no
Glyma01g00710	Glyma01g00710	Glyma01g00710	Gm01:415321-417655	ws82-0	ws82-7	OK	1.5732	0.90571	-0.796578	1.06141	0.288505	0.683876	no
Glyma01g00720	Glyma01g00720	Glyma01g00720	Gm01:418762-423973	ws82-0	ws82-7	OK	2.13818	1.55722	-0.457408	0.883304	0.377072	0.751206	no
Glyma01g00730	Glyma01g00730	Glyma01g00730	Gm01:425499-427881	ws82-0	ws82-7	OK	9.13326	3.2	-1.51306	2.45206	0.014204	0.149545	no
Glyma01g00740	Glyma01g00740	Glyma01g00740	Gm01:429463-430748	ws82-0	ws82-7	OK	48.8285	72.3808	0.567885	-1.13951	0.25449	0.651101	no
Glyma01g00750	Glyma01g00750	Glyma01g00750	Gm01:431176-433062	ws82-0	ws82-7	NOTEST	0.164041	0.299858	0.870218	-0.976246	0.328943	1	no
Glyma01g00760	Glyma01g00760	Glyma01g00760	Gm01:434429-437563	ws82-0	ws82-7	OK	27.3285	14.3947	-0.924868	1.77065	0.0766181	0.386029	no
Glyma01g00771	Glyma01g00771	Glyma01g00771	Gm01:438390-439678	ws82-0	ws82-7	OK	1.79973	7.84282	2.12359	-3.34536	0.000821768	0.0232064	yes
Glyma01g00780	Glyma01g00780	Glyma01g00780	Gm01:441913-445194	ws82-0	ws82-7	OK	0.0900266	0.518587	2.52616	-2.33355	0.0196193	0.182615	no
Glyma01g00790	Glyma01g00790	Glyma01g00790	Gm01:446961-452958	ws82-0	ws82-7	NOTEST	0.0718329	0.0557235	-0.366359	0.359901	0.718921	1	no
Glyma01g00805	Glyma01g00805	Glyma01g00805	Gm01:457615-459673	ws82-0	ws82-7	NOTEST	0	0.0274832	1.79769e+308	1.79769e+308	0.183103	1	no
Glyma01g00820	Glyma01g00820	Glyma01g00820	Gm01:464651-466721	ws82-0	ws82-7	OK	15.0765	3.98352	-1.92019	3.95618	7.61586e-05	0.00385878	yes
Glyma01g00840	Glyma01g00840	Glyma01g00840	Gm01:505341-508290	ws82-0	ws82-7	NOTEST	0.109977	0.101511	-0.115574	0.0761809	0.939275	1	no
Glyma01g00850	Glyma01g00850	Glyma01g00850	Gm01:512025-517266	ws82-0	ws82-7	OK	4.87243	1.12073	-2.1202	3.90366	9.47488e-05	0.00453306	yes
Glyma01g00860	Glyma01g00860	Glyma01g00860	Gm01:518296-520313	ws82-0	ws82-7	OK	15.7774	10.2978	-0.615519	1.14663	0.251533	0.648851	no
Glyma01g00870	Glyma01g00870	Glyma01g00870	Gm01:523808-529106	ws82-0	ws82-7	OK	35.0931	48.0529	0.453437	-0.87236	0.383012	0.755702	no
Glyma01g00880	Glyma01g00880	Glyma01g00880	Gm01:544620-550750	ws82-0	ws82-7	OK	0.644877	1.14885	0.833091	-1.11174	0.266249	0.663586	no
Glyma01g00890	Glyma01g00890	Glyma01g00890	Gm01:559624-561661	ws82-0	ws82-7	NOTEST	0.201753	0.195423	-0.0459831	0.0519226	0.95859	1	no
Glyma01g00900	Glyma01g00900	Glyma01g00900	Gm01:562674-567038	ws82-0	ws82-7	NOTEST	0.0989016	0.0652954	-0.599012	0.290145	0.771705	1	no
Glyma01g00910	Glyma01g00910	Glyma01g00910	Gm01:567202-572032	ws82-0	ws82-7	OK	0.427287	0.0959668	-2.1546	2.46337	0.0137638	0.146394	no
Glyma01g00920	Glyma01g00920	Glyma01g00920	Gm01:576437-580149	ws82-0	ws82-7	NOTEST	0	0	0	0	1	1	no
Glyma01g00930	Glyma01g00930	Glyma01g00930	Gm01:585699-587056	ws82-0	ws82-7	OK	12.771	3.16447	-2.01284	3.58785	0.00033342	0.0118147	yes
Glyma01g00940	Glyma01g00940	Glyma01g00940	Gm01:588160-598604	ws82-0	ws82-7	OK	22.1122	22.1759	0.00414574	-0.00868346	0.993072	0.998358	no
Glyma01g00950	Glyma01g00950	Glyma01g00950	Gm01:598924-599925	ws82-0	ws82-7	OK	28.1484	3.9559	-2.83097	5.40819	6.36662e-08	1.21617e-05	yes
Glyma01g00960	Glyma01g00960	Glyma01g00960	Gm01:604191-612760	ws82-0	ws82-7	OK	5.39813	5.57717	0.0470731	-0.0932513	0.925704	0.983146	no
Glyma01g00975	Glyma01g00975	Glyma01g00975	Gm01:613982-641941	ws82-0	ws82-7	OK	1.19896	1.32348	0.142546	-0.257407	0.796865	0.947967	no
Glyma01g00990	Glyma01g00990	Glyma01g00990	Gm01:643213-651111	ws82-0	ws82-7	OK	2.80439	1.6096	-0.800984	1.60256	0.109031	0.45978	no
Glyma01g01000	Glyma01g01000	Glyma01g01000	Gm01:652294-658333	ws82-0	ws82-7	OK	16.6473	16.6624	0.00130609	-0.00257084	0.997949	0.99956	no
Glyma01g01010	Glyma01g01010	Glyma01g01010	Gm01:663901-668594	ws82-0	ws82-7	NOTEST	0.0511872	0.181251	1.82414	-0.999657	0.317476	1	no
Glyma01g01020	Glyma01g01020	Glyma01g01020	Gm01:670826-674335	ws82-0	ws82-7	OK	35.7129	25.7712	-0.470687	0.989967	0.32219	0.713204	no
Glyma01g01030	Glyma01g01030	Glyma01g01030	Gm01:681416-683646	ws82-0	ws82-7	NOTEST	0.0276963	0.180682	2.70569	-1.8633	0.0624206	1	no
Glyma01g01050	Glyma01g01050	Glyma01g01050	Gm01:706987-708399	ws82-0	ws82-7	NOTEST	0.115674	0.040925	-1.49901	1.12624	0.260062	1	no
Glyma01g01060	Glyma01g01060	Glyma01g01060	Gm01:729658-735082	ws82-0	ws82-7	OK	4.87626	8.71588	0.837871	-1.67564	0.0938097	0.427358	no
Glyma01g01070	Glyma01g01070	Glyma01g01070	Gm01:735854-740661	ws82-0	ws82-7	NOTEST	0.185398	0.101135	-0.874347	0.959849	0.337131	1	no
Glyma01g01080	Glyma01g01080	Glyma01g01080	Gm01:741674-745361	ws82-0	ws82-7	OK	0.686346	0.587744	-0.223748	0.343948	0.730885	0.924594	no
Glyma01g01090	Glyma01g01090	Glyma01g01090	Gm01:746504-750472	ws82-0	ws82-7	NOTEST	0.0163014	0	-1.79769e+308	-1.79769e+308	0.135176	1	no
Glyma01g01101	Glyma01g01101	Glyma01g01101	Gm01:752181-756473	ws82-0	ws82-7	NOTEST	0	0	0	0	1	1	no
Glyma01g01110	Glyma01g01110	Glyma01g01110	Gm01:757751-761280	ws82-0	ws82-7	OK	5.85963	5.47168	-0.0988274	0.207326	0.835755	0.958709	no
Glyma01g01120	Glyma01g01120	Glyma01g01120	Gm01:762982-771636	ws82-0	ws82-7	NOTEST	0.185566	0.209625	0.175878	-0.22061	0.825396	1	no
Glyma01g01130	Glyma01g01130	Glyma01g01130	Gm01:773986-783534	ws82-0	ws82-7	NOTEST	0	0	0	0	1	1	no
Glyma01g01140	Glyma01g01140	Glyma01g01140	Gm01:773986-783534	ws82-0	ws82-7	OK	2.67534	3.24529	0.278623	-0.458634	0.646497	0.89078	no
Glyma01g01150	Glyma01g01150	Glyma01g01150	Gm01:786786-790850	ws82-0	ws82-7	OK	0.62827	0.441488	-0.509011	0.663606	0.506943	0.831192	no
Glyma01g01160	Glyma01g01160	Glyma01g01160	Gm01:801794-812173	ws82-0	ws82-7	NOTEST	0.0376981	0.0642056	0.768208	-0.765876	0.44375	1	no
Glyma01g01165	Glyma01g01165	Glyma01g01165	Gm01:813195-815449	ws82-0	ws82-7	NOTEST	0	0	0	0	1	1	no
Glyma01g01170	Glyma01g01170	Glyma01g01170	Gm01:817680-822876	ws82-0	ws82-7	OK	2.12188	1.84206	-0.204022	0.292953	0.769558	0.938314	no
Glyma01g01180	Glyma01g01180	Glyma01g01180	Gm01:826828-831862	ws82-0	ws82-7	OK	52.4239	26.6828	-0.974316	1.94387	0.0519115	0.316187	no
Glyma01g01190	Glyma01g01190	Glyma01g01190	Gm01:837437-839839	ws82-0	ws82-7	OK	16.5277	10.7826	-0.616181	1.29454	0.195478	0.588522	no
Glyma01g01210	Glyma01g01210	Glyma01g01210	Gm01:841603-854009	ws82-0	ws82-7	NOTEST	0.13754	0.0663215	-1.05231	1.13255	0.257403	1	no
Glyma01g01220	Glyma01g01220	Glyma01g01220	Gm01:861697-864316	ws82-0	ws82-7	OK	10.8237	9.50739	-0.187079	0.326437	0.744094	0.929158	no
Glyma01g01230	Glyma01g01230	Glyma01g01230	Gm01:864945-873519	ws82-0	ws82-7	OK	2.49777	1.2228	-1.03045	1.92896	0.0537355	0.322045	no
Glyma01g01240	Glyma01g01240	Glyma01g01240	Gm01:882373-883583	ws82-0	ws82-7	OK	3.51255	1.81805	-0.95013	1.55924	0.118939	0.477367	no
Glyma01g01251	Glyma01g01251	Glyma01g01251	Gm01:897328-899783	ws82-0	ws82-7	NOTEST	0	0.00995732	1.79769e+308	1.79769e+308	0.252781	1	no
Glyma01g01260	Glyma01g01260	Glyma01g01260	Gm01:901470-902792	ws82-0	ws82-7	OK	81.5881	89.7341	0.137297	-0.28246	0.777591	0.940694	no
Glyma01g01270	Glyma01g01270	Glyma01g01270	Gm01:908126-916913	ws82-0	ws82-7	OK	11.4398	9.41301	-0.281335	0.595186	0.551719	0.853289	no
Glyma01g01280	Glyma01g01280	Glyma01g01280	Gm01:919766-925870	ws82-0	ws82-7	OK	2.0062	1.60606	-0.320941	0.620287	0.535069	0.843537	no
Glyma01g01291	Glyma01g01291	Glyma01g01291	Gm01:934414-936646	ws82-0	ws82-7	OK	0.529193	0.953255	0.849068	-1.08505	0.277899	0.673933	no
Glyma01g01300	Glyma01g01300	Glyma01g01300	Gm01:937313-940538	ws82-0	ws82-7	OK	0.493057	0.873948	0.825793	-1.10549	0.268947	0.666491	no
Glyma01g01310	Glyma01g01310	Glyma01g01310	Gm01:952468-956652	ws82-0	ws82-7	OK	0.559927	0.732082	0.386766	-0.559992	0.575485	0.863371	no
Glyma01g01330	Glyma01g01330	Glyma01g01330	Gm01:959531-963281	ws82-0	ws82-7	OK	17.2554	16.5268	-0.0622361	0.1293	0.89712	0.975417	no
Glyma01g01340	Glyma01g01340	Glyma01g01340	Gm01:966937-971332	ws82-0	ws82-7	OK	12.1711	17.9802	0.562943	-1.18788	0.234882	0.63138	no
Glyma01g01350	Glyma01g01350	Glyma01g01350	Gm01:972898-978372	ws82-0	ws82-7	OK	1.30799	3.61698	1.46743	-2.22376	0.0261645	0.21698	no
Glyma01g01360	Glyma01g01360	Glyma01g01360	Gm01:980271-987366	ws82-0	ws82-7	OK	1.34109	4.91029	1.87241	-3.46163	0.000536919	0.017045	yes
Glyma01g01365	Glyma01g01365	Glyma01g01365	Gm01:991596-992349	ws82-0	ws82-7	NOTEST	0.293553	0.1896	-0.630662	0.305476	0.760004	1	no
Glyma01g01370	Glyma01g01370	Glyma01g01370	Gm01:992662-997177	ws82-0	ws82-7	OK	834.417	682.295	-0.290373	0.446314	0.65537	0.894265	no
Glyma01g01380	Glyma01g01380	Glyma01g01380	Gm01:1000826-1006591	ws82-0	ws82-7	OK	16.7432	12.8446	-0.38241	0.732713	0.463734	0.80729	no
Glyma01g01390	Glyma01g01390	Glyma01g01390	Gm01:1008758-1013501	ws82-0	ws82-7	OK	8.64795	16.1215	0.898556	-1.89603	0.0579558	0.336067	no
Glyma01g01400	Glyma01g01400	Glyma01g01400	Gm01:1018233-1021659	ws82-0	ws82-7	OK	3.36111	5.52385	0.716733	-1.48972	0.136297	0.502903	no
Glyma01g01410	Glyma01g01410	Glyma01g01410	Gm01:1023044-1025742	ws82-0	ws82-7	OK	58.4789	70.5731	0.271202	-0.569131	0.569267	0.859774	no
Glyma01g01420	Glyma01g01420	Glyma01g01420	Gm01:1028982-1033386	ws82-0	ws82-7	NOTEST	0.0175667	0	-1.79769e+308	-1.79769e+308	0.135176	1	no
Glyma01g01431	Glyma01g01431	Glyma01g01431	Gm01:1035987-1043507	ws82-0	ws82-7	OK	2.08453	2.22274	0.0926198	-0.154603	0.877134	0.970234	no
Glyma01g01440	Glyma01g01440	Glyma01g01440	Gm01:1047147-1051040	ws82-0	ws82-7	OK	13.4751	10.7623	-0.324309	0.565792	0.571535	0.8606	no
Glyma01g01450	Glyma01g01450	Glyma01g01450	Gm01:1052601-1053493	ws82-0	ws82-7	OK	0.443643	1.1077	1.3201	-1.50977	0.131102	0.496418	no
Glyma01g01460	Glyma01g01460	Glyma01g01460	Gm01:1056819-1061665	ws82-0	ws82-7	OK	6.62266	8.55092	0.368669	-0.757688	0.448638	0.798931	no
Glyma01g01470	Glyma01g01470	Glyma01g01470	Gm01:1066130-1073350	ws82-0	ws82-7	OK	5.02372	5.35916	0.0932504	-0.196039	0.844579	0.961144	no
Glyma01g01480	Glyma01g01480	Glyma01g01480	Gm01:1088031-1090516	ws82-0	ws82-7	OK	25.0675	21.9373	-0.192432	0.402623	0.687225	0.907247	no
Glyma01g01491	Glyma01g01491	Glyma01g01491	Gm01:1091316-1094909	ws82-0	ws82-7	OK	0.862515	1.09344	0.342249	-0.472211	0.636776	0.887333	no
Glyma01g01500	Glyma01g01500	Glyma01g01500	Gm01:1095456-1099007	ws82-0	ws82-7	NOTEST	0	0	0	0	1	1	no
Glyma01g01510	Glyma01g01510	Glyma01g01510	Gm01:1125596-1130365	ws82-0	ws82-7	NOTEST	0.158905	0.0759613	-1.06483	1.07446	0.282615	1	no
Glyma01g01521	Glyma01g01521	Glyma01g01521	Gm01:1133845-1137317	ws82-0	ws82-7	OK	1.16278	0.7096	-0.712504	1.04287	0.297009	0.690593	no
Glyma01g01530	Glyma01g01530	Glyma01g01530	Gm01:1138207-1139962	ws82-0	ws82-7	NOTEST	0.0546923	0	-1.79769e+308	-1.79769e+308	0.135176	1	no
Glyma01g01550	Glyma01g01550	Glyma01g01550	Gm01:1143928-1150404	ws82-0	ws82-7	OK	0.623065	0.821081	0.39814	-0.598788	0.549315	0.851598	no
Glyma01g01560	Glyma01g01560	Glyma01g01560	Gm01:1160591-1165098	ws82-0	ws82-7	OK	0.375313	0.294315	-0.350731	0.497292	0.618983	0.88169	no
Glyma01g01570	Glyma01g01570	Glyma01g01570	Gm01:1165649-1171110	ws82-0	ws82-7	OK	0.783208	1.19438	0.60879	-0.932775	0.350936	0.735192	no
Glyma01g01580	Glyma01g01580	Glyma01g01580	Gm01:1185427-1188776	ws82-0	ws82-7	NOTEST	0	0.0404329	1.79769e+308	1.79769e+308	0.100645	1	no
Glyma01g01590	Glyma01g01590	Glyma01g01590	Gm01:1196921-1198375	ws82-0	ws82-7	OK	8.37141	3.35876	-1.31754	1.86756	0.061824	0.345246	no
Glyma01g01601	Glyma01g01601	Glyma01g01601	Gm01:1201663-1205929	ws82-0	ws82-7	OK	11.7961	10.2002	-0.209704	0.440285	0.659731	0.895757	no
Glyma01g01610	Glyma01g01610	Glyma01g01610	Gm01:1207927-1212597	ws82-0	ws82-7	OK	11.9544	7.22166	-0.727138	1.53667	0.124375	0.485894	no
Glyma01g01620	Glyma01g01620	Glyma01g01620	Gm01:1215172-1220713	ws82-0	ws82-7	OK	1.32599	0.908101	-0.54614	0.764102	0.444806	0.796324	no
Glyma01g01630	Glyma01g01630	Glyma01g01630	Gm01:1224165-1228877	ws82-0	ws82-7	NOTEST	0	0	0	0	1	1	no
Glyma01g01641	Glyma01g01641	Glyma01g01641	Gm01:1231917-1233070	ws82-0	ws82-7	NOTEST	0	0	0	0	1	1	no
Glyma01g01651	Glyma01g01651	Glyma01g01651	Gm01:1235950-1236741	ws82-0	ws82-7	OK	0.145778	0.451624	1.63135	-1.28823	0.197667	0.590672	no
Glyma01g01661	Glyma01g01661	Glyma01g01661	Gm01:1237990-1239189	ws82-0	ws82-7	OK	17.8241	7.8813	-1.17732	1.22819	0.219374	0.615382	no
Glyma01g01671	Glyma01g01671	Glyma01g01671	Gm01:1237990-1239189	ws82-0	ws82-7	OK	4.19762	4.72162	0.169709	-0.134462	0.893037	0.974771	no
Glyma01g01680	Glyma01g01680	Glyma01g01680	Gm01:1241352-1245024	ws82-0	ws82-7	NOTEST	0	0.00446911	1.79769e+308	1.79769e+308	0.26143	1	no
Glyma01g01690	Glyma01g01690	Glyma01g01690	Gm01:1252980-1257657	ws82-0	ws82-7	NOTEST	0	0	0	0	1	1	no
Glyma01g01700	Glyma01g01700	Glyma01g01700	Gm01:1273194-1280313	ws82-0	ws82-7	NOTEST	0	0	0	0	1	1	no
Glyma01g01715	Glyma01g01715	Glyma01g01715	Gm01:1283531-1285362	ws82-0	ws82-7	NOTEST	0	0	0	0	1	1	no
Glyma01g01730	Glyma01g01730	Glyma01g01730	Gm01:1289360-1298217	ws82-0	ws82-7	OK	2.58156	0.808796	-1.67439	2.81373	0.00489709	0.0771054	no
Glyma01g01740	Glyma01g01740	Glyma01g01740	Gm01:1307387-1317730	ws82-0	ws82-7	OK	4.18631	4.78422	0.192604	-0.370592	0.710941	0.917075	no
Glyma01g01750	Glyma01g01750	Glyma01g01750	Gm01:1319394-1322259	ws82-0	ws82-7	OK	3.11612	4.26552	0.45297	-0.92806	0.353377	0.736777	no
Glyma01g01770	Glyma01g01770	Glyma01g01770	Gm01:1332992-1336611	ws82-0	ws82-7	OK	24.4344	10.5302	-1.21439	2.19467	0.028187	0.225809	no
Glyma01g01780	Glyma01g01780	Glyma01g01780	Gm01:1342969-1347966	ws82-0	ws82-7	NOTEST	0.368229	0.350804	-0.069936	0.0994008	0.92082	1	no
Glyma01g01790	Glyma01g01790	Glyma01g01790	Gm01:1357260-1362758	ws82-0	ws82-7	OK	0.369987	0.800321	1.11311	-1.40232	0.160821	0.543505	no
Glyma01g01805	Glyma01g01805	Glyma01g01805	Gm01:1377132-1387290	ws82-0	ws82-7	OK	2.47163	2.29855	-0.104734	0.17534	0.860812	0.965631	no
Glyma01g01820	Glyma01g01820	Glyma01g01820	Gm01:1391664-1392341	ws82-0	ws82-7	NOTEST	0	0	0	0	1	1	no
Glyma01g01830	Glyma01g01830	Glyma01g01830	Gm01:1394336-1398687	ws82-0	ws82-7	OK	17.7078	20.038	0.178359	-0.353044	0.724055	0.92211	no
Glyma01g01840	Glyma01g01840	Glyma01g01840	Gm01:1399714-1403226	ws82-0	ws82-7	OK	3.04233	3.59007	0.238837	-0.369331	0.711881	0.917481	no
Glyma01g01850	Glyma01g01850	Glyma01g01850	Gm01:1409321-1416077	ws82-0	ws82-7	OK	1.08555	0.185938	-2.54553	3.66555	0.000246806	0.00949459	yes
Glyma01g01860	Glyma01g01860	Glyma01g01860	Gm01:1432595-1439227	ws82-0	ws82-7	OK	4.02485	5.47086	0.442832	-0.882252	0.37764	0.751453	no
Glyma01g01875	Glyma01g01875	Glyma01g01875	Gm01:1464340-1468599	ws82-0	ws82-7	OK	4.38378	7.4101	0.757318	-1.40708	0.159404	0.541001	no
Glyma01g01890	Glyma01g01890	Glyma01g01890	Gm01:1483775-1488285	ws82-0	ws82-7	OK	9.93276	13.6776	0.461545	-0.971605	0.331247	0.720332	no
Glyma01g01900	Glyma01g01900	Glyma01g01900	Gm01:1489317-1495820	ws82-0	ws82-7	OK	28.5066	15.3518	-0.892882	1.67595	0.0937471	0.427254	no
Glyma01g01910	Glyma01g01910	Glyma01g01910	Gm01:1500824-1504087	ws82-0	ws82-7	OK	107.112	111.854	0.062494	-0.113511	0.909625	0.980157	no
Glyma01g01920	Glyma01g01920	Glyma01g01920	Gm01:1504880-1510358	ws82-0	ws82-7	NOTEST	0.120005	0.0692111	-0.794017	0.866587	0.386168	1	no
Glyma01g01930	Glyma01g01930	Glyma01g01930	Gm01:1511111-1512857	ws82-0	ws82-7	OK	3.07466	1.97986	-0.635025	0.937164	0.348674	0.733583	no
Glyma01g01940	Glyma01g01940	Glyma01g01940	Gm01:1514417-1515781	ws82-0	ws82-7	OK	58.6122	30.2389	-0.954797	2.0068	0.0447712	0.292014	no
Glyma01g01950	Glyma01g01950	Glyma01g01950	Gm01:1520439-1523995	ws82-0	ws82-7	OK	16.5016	13.4945	-0.290235	0.612396	0.540276	0.846542	no
Glyma01g01960	Glyma01g01960	Glyma01g01960	Gm01:1526003-1531395	ws82-0	ws82-7	OK	3.28725	2.25385	-0.544491	0.969334	0.332378	0.721122	no
Glyma01g01970	Glyma01g01970	Glyma01g01970	Gm01:1532782-1536385	ws82-0	ws82-7	OK	0.958942	1.07417	0.163705	-0.213218	0.831157	0.957841	no
Glyma01g01980	Glyma01g01980	Glyma01g01980	Gm01:1537139-1538153	ws82-0	ws82-7	NOTEST	0.0566698	0	-1.79769e+308	-1.79769e+308	0.135176	1	no
Glyma01g01990	Glyma01g01990	Glyma01g01990	Gm01:1540562-1544363	ws82-0	ws82-7	OK	6.2273	6.18565	-0.00968129	0.0202461	0.983847	0.996742	no
Glyma01g02020	Glyma01g02020	Glyma01g02020	Gm01:1547972-1555699	ws82-0	ws82-7	LOWDATA	0	0	1.04734	0	1	1	no
Glyma01g02031	Glyma01g02031	Glyma01g02031	Gm01:1547972-1555699	ws82-0	ws82-7	NOTEST	0.129521	0.267683	1.04734	-1.37869	0.167991	1	no
Glyma01g02040	Glyma01g02040	Glyma01g02040	Gm01:1558849-1560186	ws82-0	ws82-7	OK	4.02493	3.81208	-0.0783848	0.121859	0.903011	0.977409	no
Glyma01g02050	Glyma01g02050	Glyma01g02050	Gm01:1564664-1568931	ws82-0	ws82-7	OK	2.54115	3.42025	0.428624	-0.715496	0.474302	0.814385	no
Glyma01g02060	Glyma01g02060	Glyma01g02060	Gm01:1577696-1587475	ws82-0	ws82-7	OK	8.76232	3.74279	-1.2272	2.5829	0.00979731	0.118978	no
Glyma01g02070	Glyma01g02070	Glyma01g02070	Gm01:1596899-1599449	ws82-0	ws82-7	OK	0.5732	0.670566	0.226342	-0.292295	0.770061	0.938484	no
Glyma01g02080	Glyma01g02080	Glyma01g02080	Gm01:1603349-1604459	ws82-0	ws82-7	NOTEST	0	0	0	0	1	1	no
Glyma01g02090	Glyma01g02090	Glyma01g02090	Gm01:1613117-1616592	ws82-0	ws82-7	OK	43.8814	22.972	-0.933735	1.96115	0.0498615	0.309544	no
Glyma01g02100	Glyma01g02100	Glyma01g02100	Gm01:1618639-1623534	ws82-0	ws82-7	OK	4.76012	5.93501	0.318253	-0.659172	0.509785	0.83262	no
Glyma01g02110	Glyma01g02110	Glyma01g02110	Gm01:1626846-1628287	ws82-0	ws82-7	OK	11.8023	3.93911	-1.58312	2.66088	0.00779379	0.103496	no
Glyma01g02120	Glyma01g02120	Glyma01g02120	Gm01:1633690-1637207	ws82-0	ws82-7	OK	16.1827	11.018	-0.554592	1.16216	0.245169	0.641447	no
Glyma01g02130	Glyma01g02130	Glyma01g02130	Gm01:1642576-1643443	ws82-0	ws82-7	NOTEST	0	0	0	0	1	1	no
Glyma01g02140	Glyma01g02140	Glyma01g02140	Gm01:1648084-1649989	ws82-0	ws82-7	NOTEST	0.115881	0.227044	0.97032	-0.854758	0.392685	1	no
Glyma01g02150	Glyma01g02150	Glyma01g02150	Gm01:1653306-1656923	ws82-0	ws82-7	OK	24.6241	35.6346	0.533209	-1.12256	0.261623	0.659075	no
Glyma01g02160	Glyma01g02160	Glyma01g02160	Gm01:1662473-1663732	ws82-0	ws82-7	NOTEST	0	0	0	0	1	1	no
Glyma01g02171	Glyma01g02171	Glyma01g02171	Gm01:1673102-1673545	ws82-0	ws82-7	NOTEST	0	0	0	0	1	1	no
Glyma01g02180	Glyma01g02180	Glyma01g02180	Gm01:1688059-1691046	ws82-0	ws82-7	OK	34.7362	23.1297	-0.586692	1.22767	0.21957	0.615464	no
Glyma01g02190	Glyma01g02190	Glyma01g02190	Gm01:1721264-1722533	ws82-0	ws82-7	OK	6.93589	11.7991	0.766519	-1.49453	0.135036	0.501259	no
Glyma01g02200	Glyma01g02200	Glyma01g02200	Gm01:1733389-1734562	ws82-0	ws82-7	OK	6.04334	3.67599	-0.717213	1.34888	0.177377	0.566489	no
Glyma01g02215	Glyma01g02215	Glyma01g02215	Gm01:1735229-1736763	ws82-0	ws82-7	OK	21.1023	48.478	1.19993	-2.3813	0.0172517	0.168107	no
Glyma01g02230	Glyma01g02230	Glyma01g02230	Gm01:1744296-1745378	ws82-0	ws82-7	OK	18.7174	31.6987	0.760043	-1.50463	0.132419	0.498848	no
Glyma01g02235	Glyma01g02235	Glyma01g02235	Gm01:1747643-1748703	ws82-0	ws82-7	NOTEST	0	0	0	0	1	1	no
Glyma01g02240	Glyma01g02240	Glyma01g02240	Gm01:1748705-1753242	ws82-0	ws82-7	OK	1.2223	1.21703	-0.00623936	0.0106236	0.991524	0.998113	no
Glyma01g02251	Glyma01g02251	Glyma01g02251	Gm01:1771935-1773875	ws82-0	ws82-7	OK	42.6456	20.158	-1.08105	2.21725	0.0266059	0.219763	no
Glyma01g02260	Glyma01g02260	Glyma01g02260	Gm01:1781864-1782671	ws82-0	ws82-7	NOTEST	0	0	0	0	1	1	no
Glyma01g02270	Glyma01g02270	Glyma01g02270	Gm01:1782704-1786280	ws82-0	ws82-7	OK	2.07931	2.72258	0.388869	-0.527052	0.598157	0.874344	no
Glyma01g02280	Glyma01g02280	Glyma01g02280	Gm01:1788990-1791158	ws82-0	ws82-7	OK	7.6634	5.48839	-0.481603	0.986694	0.323793	0.714482	no
Glyma01g02290	Glyma01g02290	Glyma01g02290	Gm01:1803011-1804370	ws82-0	ws82-7	OK	4.63402	12.9726	1.48513	-2.99406	0.0027529	0.0532601	no
Glyma01g02295	Glyma01g02295	Glyma01g02295	Gm01:1813531-1816390	ws82-0	ws82-7	NOTEST	0	0	0	0	1	1	no
Glyma01g02300	Glyma01g02300	Glyma01g02300	Gm01:1817115-1820935	ws82-0	ws82-7	NOTEST	0.277529	0.121288	-1.19419	1.29795	0.194304	1	no
Glyma01g02310	Glyma01g02310	Glyma01g02310	Gm01:1822915-1823629	ws82-0	ws82-7	NOTEST	0	0	0	0	1	1	no
Glyma01g02321	Glyma01g02321	Glyma01g02321	Gm01:1825753-1835393	ws82-0	ws82-7	OK	11.547	11.1187	-0.0545315	0.107712	0.914224	0.980843	no
Glyma01g02330	Glyma01g02330	Glyma01g02330	Gm01:1838125-1845872	ws82-0	ws82-7	OK	1.00775	1.43146	0.506353	-0.865594	0.386713	0.757799	no
Glyma01g02340	Glyma01g02340	Glyma01g02340	Gm01:1865275-1868142	ws82-0	ws82-7	OK	2.63306	2.87945	0.129051	-0.258064	0.796357	0.947804	no
Glyma01g02350	Glyma01g02350	Glyma01g02350	Gm01:1886187-1890464	ws82-0	ws82-7	OK	8.63312	7.28531	-0.244891	0.487955	0.625582	0.884135	no
Glyma01g02360	Glyma01g02360	Glyma01g02360	Gm01:1905414-1906471	ws82-0	ws82-7	OK	1.2969	4.31962	1.73584	-2.59675	0.00941107	0.116112	no
Glyma01g02380	Glyma01g02380	Glyma01g02380	Gm01:1929549-1932204	ws82-0	ws82-7	OK	0.941422	1.62034	0.783384	-1.28281	0.199558	0.593605	no
Glyma01g02390	Glyma01g02390	Glyma01g02390	Gm01:1940680-1942652	ws82-0	ws82-7	OK	0.0956273	0.659287	2.78541	-2.71816	0.00656455	0.0923371	no
Glyma01g02400	Glyma01g02400	Glyma01g02400	Gm01:1969464-1975586	ws82-0	ws82-7	OK	115.009	86.7412	-0.406955	0.68826	0.491289	0.821278	no
Glyma01g02420	Glyma01g02420	Glyma01g02420	Gm01:1977639-1982632	ws82-0	ws82-7	OK	5.25332	5.0831	-0.0475218	0.0954109	0.923988	0.982675	no
Glyma01g02435	Glyma01g02435	Glyma01g02435	Gm01:1989327-1993130	ws82-0	ws82-7	NOTEST	0	0	0	0	1	1	no
Glyma01g02451	Glyma01g02451	Glyma01g02451	Gm01:1998300-2009388	ws82-0	ws82-7	NOTEST	0.0150959	0.0369035	1.2896	-0.302295	0.762427	1	no
Glyma01g02465	Glyma01g02465	Glyma01g02465	Gm01:1998300-2009388	ws82-0	ws82-7	OK	7.74867	6.46781	-0.26067	0.391543	0.695396	0.911059	no
Glyma01g02480	Glyma01g02480	Glyma01g02480	Gm01:2010099-2018636	ws82-0	ws82-7	OK	22.736	18.3581	-0.308562	0.643876	0.519656	0.836392	no
Glyma01g02510	Glyma01g02510	Glyma01g02510	Gm01:2033797-2034792	ws82-0	ws82-7	NOTEST	0.14309	0	-1.79769e+308	-1.79769e+308	0.0595194	1	no
Glyma01g02525	Glyma01g02525	Glyma01g02525	Gm01:2038298-2054214	ws82-0	ws82-7	NOTEST	0	0	0	0	1	1	no
Glyma01g02540	Glyma01g02540	Glyma01g02540	Gm01:2065426-2066242	ws82-0	ws82-7	NOTEST	0	0	0	0	1	1	no
Glyma01g02550	Glyma01g02550	Glyma01g02550	Gm01:2067340-2068207	ws82-0	ws82-7	NOTEST	0	0	0	0	1	1	no
Glyma01g02560	Glyma01g02560	Glyma01g02560	Gm01:2089449-2097520	ws82-0	ws82-7	NOTEST	0	0.107309	1.79769e+308	1.79769e+308	0.014362	1	no
Glyma01g02570	Glyma01g02570	Glyma01g02570	Gm01:2102150-2107115	ws82-0	ws82-7	OK	5.79324	8.82921	0.607914	-1.23224	0.217858	0.613673	no
Glyma01g02580	Glyma01g02580	Glyma01g02580	Gm01:2119856-2122838	ws82-0	ws82-7	OK	5.95082	18.6342	1.64679	-3.37882	0.000727965	0.0212246	yes
Glyma01g02610	Glyma01g02610	Glyma01g02610	Gm01:2137616-2139436	ws82-0	ws82-7	OK	1.21875	0.295868	-2.04237	2.78185	0.00540499	0.08207	no
Glyma01g02620	Glyma01g02620	Glyma01g02620	Gm01:2146050-2152449	ws82-0	ws82-7	NOTEST	0.0395795	0.0422038	0.0926204	-0.0878991	0.929957	1	no
Glyma01g02630	Glyma01g02630	Glyma01g02630	Gm01:2156930-2161301	ws82-0	ws82-7	OK	3.62823	3.51485	-0.0458063	0.084487	0.932669	0.984473	no
Glyma01g02640	Glyma01g02640	Glyma01g02640	Gm01:2168404-2173706	ws82-0	ws82-7	OK	9.9527	5.4352	-0.872755	1.7832	0.074554	0.381118	no
Glyma01g02660	Glyma01g02660	Glyma01g02660	Gm01:2184322-2188837	ws82-0	ws82-7	OK	13.9127	6.88837	-1.01417	2.01212	0.0442075	0.290011	no
Glyma01g02670	Glyma01g02670	Glyma01g02670	Gm01:2192165-2194689	ws82-0	ws82-7	OK	3.90156	3.54089	-0.139939	0.273827	0.784218	0.94335	no
Glyma01g02691	Glyma01g02691	Glyma01g02691	Gm01:2199760-2201127	ws82-0	ws82-7	OK	0.57097	0.822603	0.526781	-0.662053	0.507937	0.831571	no
Glyma01g02710	Glyma01g02710	Glyma01g02710	Gm01:2204078-2206129	ws82-0	ws82-7	NOTEST	0	0	0	0	1	1	no
Glyma01g02720	Glyma01g02720	Glyma01g02720	Gm01:2204078-2206129	ws82-0	ws82-7	OK	40.2812	49.3302	0.292366	-0.615909	0.537954	0.845135	no
Glyma01g02740	Glyma01g02740	Glyma01g02740	Gm01:2209772-2211864	ws82-0	ws82-7	NOTEST	0.0745239	0.0334477	-1.1558	0.850767	0.394899	1	no
Glyma01g02750	Glyma01g02750	Glyma01g02750	Gm01:2228817-2234268	ws82-0	ws82-7	OK	1.07142	0.932941	-0.199668	0.309405	0.757013	0.933121	no
Glyma01g02760	Glyma01g02760	Glyma01g02760	Gm01:2239126-2244480	ws82-0	ws82-7	NOTEST	0.0774127	0.152141	0.974771	-1.0408	0.297966	1	no
Glyma01g02780	Glyma01g02780	Glyma01g02780	Gm01:2274285-2279870	ws82-0	ws82-7	OK	10.0807	13.4819	0.419433	-0.882956	0.37726	0.751244	no
Glyma01g02790	Glyma01g02790	Glyma01g02790	Gm01:2280412-2286189	ws82-0	ws82-7	OK	0.214482	0.414503	0.950527	-1.04298	0.296956	0.690582	no
Glyma01g02800	Glyma01g02800	Glyma01g02800	Gm01:2289835-2296934	ws82-0	ws82-7	OK	0.622752	1.06741	0.777382	-1.22561	0.220347	0.616229	no
Glyma01g02810	Glyma01g02810	Glyma01g02810	Gm01:2296971-2301386	ws82-0	ws82-7	NOTEST	0.0514177	0.137068	1.41456	-1.56035	0.118677	1	no
Glyma01g02820	Glyma01g02820	Glyma01g02820	Gm01:2307249-2310533	ws82-0	ws82-7	OK	9.18445	11.6887	0.34785	-0.720861	0.470995	0.812426	no
Glyma01g02830	Glyma01g02830	Glyma01g02830	Gm01:2320650-2323809	ws82-0	ws82-7	NOTEST	0	0	0	0	1	1	no
Glyma01g02840	Glyma01g02840	Glyma01g02840	Gm01:2324547-2332128	ws82-0	ws82-7	OK	21.8179	13.2628	-0.718131	1.44605	0.148162	0.522782	no
Glyma01g02850	Glyma01g02850	Glyma01g02850	Gm01:2336135-2340956	ws82-0	ws82-7	OK	54.0126	22.1781	-1.28416	2.4797	0.0131493	0.142752	no
Glyma01g02880	Glyma01g02880	Glyma01g02880	Gm01:2360197-2366406	ws82-0	ws82-7	OK	8.903	10.1025	0.182356	-0.308649	0.757589	0.933415	no
Glyma01g02890	Glyma01g02890	Glyma01g02890	Gm01:2373884-2395585	ws82-0	ws82-7	OK	3.29722	3.91993	0.249582	-0.523305	0.600762	0.875474	no
Glyma01g02900	Glyma01g02900	Glyma01g02900	Gm01:2398001-2407368	ws82-0	ws82-7	OK	2.04073	1.06025	-0.944675	1.35635	0.174987	0.563751	no
Glyma01g02920	Glyma01g02920	Glyma01g02920	Gm01:2419558-2420449	ws82-0	ws82-7	OK	1.3683	1.5362	0.166982	-0.240922	0.809616	0.951455	no
Glyma01g02930	Glyma01g02930	Glyma01g02930	Gm01:2424756-2426304	ws82-0	ws82-7	NOTEST	0	0.103769	1.79769e+308	1.79769e+308	0.0587815	1	no
Glyma01g02941	Glyma01g02941	Glyma01g02941	Gm01:2426753-2435682	ws82-0	ws82-7	OK	1.9389	2.01517	0.055667	-0.107809	0.914148	0.980843	no
Glyma01g02950	Glyma01g02950	Glyma01g02950	Gm01:2448362-2450139	ws82-0	ws82-7	OK	53.8742	14.5027	-1.89327	3.89928	9.64791e-05	0.00460086	yes
Glyma01g02963	Glyma01g02963	Glyma01g02963	Gm01:2455817-2458234	ws82-0	ws82-7	NOTEST	0.00454086	0.00390026	-0.219395	0.0446369	0.964397	1	no
Glyma01g02976	Glyma01g02976	Glyma01g02976	Gm01:2465269-2466518	ws82-0	ws82-7	NOTEST	0	0	0	0	1	1	no
Glyma01g02990	Glyma01g02990	Glyma01g02990	Gm01:2477179-2479230	ws82-0	ws82-7	OK	6.4723	2.14964	-1.59019	2.74999	0.0059597	0.0869802	no
Glyma01g03005	Glyma01g03005	Glyma01g03005	Gm01:2495435-2497366	ws82-0	ws82-7	OK	0.605133	0.301124	-1.0069	1.27466	0.20243	0.596434	no
Glyma01g03020	Glyma01g03020	Glyma01g03020	Gm01:2497579-2500150	ws82-0	ws82-7	OK	13.2915	12.2313	-0.119929	0.246804	0.80506	0.950031	no
Glyma01g03030	Glyma01g03030	Glyma01g03030	Gm01:2522226-2524933	ws82-0	ws82-7	OK	1.56856	1.86312	0.24828	-0.405635	0.685011	0.906313	no
Glyma01g03040	Glyma01g03040	Glyma01g03040	Gm01:2530562-2537849	ws82-0	ws82-7	NOTEST	0.0315739	0.137133	2.11877	-1.43676	0.150785	1	no
Glyma01g03050	Glyma01g03050	Glyma01g03050	Gm01:2543533-2544636	ws82-0	ws82-7	NOTEST	0	0	0	0	1	1	no
Glyma01g03060	Glyma01g03060	Glyma01g03060	Gm01:2551019-2553294	ws82-0	ws82-7	NOTEST	0.0912939	0.20202	1.14591	-1.24111	0.214566	1	no
Glyma01g03070	Glyma01g03070	Glyma01g03070	Gm01:2585415-2586673	ws82-0	ws82-7	OK	277.81	411.665	0.567372	-1.0481	0.294594	0.688782	no
Glyma01g03090	Glyma01g03090	Glyma01g03090	Gm01:2600263-2605224	ws82-0	ws82-7	OK	4.8245	3.17078	-0.605542	1.17056	0.241777	0.638087	no
Glyma01g03100	Glyma01g03100	Glyma01g03100	Gm01:2633476-2636259	ws82-0	ws82-7	OK	2.35111	4.68409	0.994428	-1.85043	0.0642514	0.352582	no
Glyma01g03110	Glyma01g03110	Glyma01g03110	Gm01:2667742-2669323	ws82-0	ws82-7	NOTEST	0	0	0	0	1	1	no
Glyma01g03120	Glyma01g03120	Glyma01g03120	Gm01:2683531-2686001	ws82-0	ws82-7	OK	4.28817	4.36244	0.0247734	-0.0454645	0.963737	0.991465	no
Glyma01g03130	Glyma01g03130	Glyma01g03130	Gm01:2686762-2690092	ws82-0	ws82-7	OK	8.09151	4.29355	-0.91424	1.8682	0.0617342	0.345151	no
Glyma01g03140	Glyma01g03140	Glyma01g03140	Gm01:2696508-2700015	ws82-0	ws82-7	LOWDATA	0	0	-0.137454	0	1	1	no
Glyma01g03150	Glyma01g03150	Glyma01g03150	Gm01:2696508-2700015	ws82-0	ws82-7	OK	56.4363	51.3075	-0.137454	0.240297	0.8101	0.951654	no
Glyma01g03160	Glyma01g03160	Glyma01g03160	Gm01:2716401-2724818	ws82-0	ws82-7	OK	6.01779	9.55654	0.667255	-1.26455	0.206032	0.60042	no
Glyma01g03180	Glyma01g03180	Glyma01g03180	Gm01:2725857-2728953	ws82-0	ws82-7	OK	21.7794	36.5338	0.746268	-1.56166	0.118367	0.476341	no
Glyma01g03190	Glyma01g03190	Glyma01g03190	Gm01:2731349-2739464	ws82-0	ws82-7	OK	1.13393	1.87327	0.72423	-1.22798	0.219454	0.615464	no
Glyma01g03200	Glyma01g03200	Glyma01g03200	Gm01:2741979-2744444	ws82-0	ws82-7	NOTEST	0	0	0	0	1	1	no
Glyma01g03210	Glyma01g03210	Glyma01g03210	Gm01:2749285-2751625	ws82-0	ws82-7	OK	0.802296	0.442938	-0.85703	1.25851	0.208208	0.602928	no
Glyma01g03220	Glyma01g03220	Glyma01g03220	Gm01:2752604-2755538	ws82-0	ws82-7	OK	9.93084	8.13589	-0.287616	0.602778	0.546656	0.849729	no
Glyma01g03240	Glyma01g03240	Glyma01g03240	Gm01:2765558-2766634	ws82-0	ws82-7	OK	0.264813	0.378689	0.516041	-0.540836	0.588621	0.870046	no
Glyma01g03260	Glyma01g03260	Glyma01g03260	Gm01:2784884-2792465	ws82-0	ws82-7	OK	772.057	399.01	-0.952283	1.38821	0.165075	0.549995	no
Glyma01g03270	Glyma01g03270	Glyma01g03270	Gm01:2803081-2807357	ws82-0	ws82-7	OK	2.91631	2.37618	-0.295502	0.528096	0.597433	0.874012	no
Glyma01g03281	Glyma01g03281	Glyma01g03281	Gm01:2811064-2811250	ws82-0	ws82-7	NOTEST	0	0	0	0	1	1	no
Glyma01g03290	Glyma01g03290	Glyma01g03290	Gm01:2814292-2814876	ws82-0	ws82-7	NOTEST	0	0	0	0	1	1	no
Glyma01g03301	Glyma01g03301	Glyma01g03301	Gm01:2815679-2817384	ws82-0	ws82-7	NOTEST	0	0.135974	1.79769e+308	1.79769e+308	0.0353652	1	no
Glyma01g03310	Glyma01g03310	Glyma01g03310	Gm01:2820282-2822588	ws82-0	ws82-7	NOTEST	0	0	0	0	1	1	no
Glyma01g03321	Glyma01g03321	Glyma01g03321	Gm01:2825602-2830330	ws82-0	ws82-7	NOTEST	0	0	0	0	1	1	no
Glyma01g03330	Glyma01g03330	Glyma01g03330	Gm01:2836050-2840937	ws82-0	ws82-7	OK	8.31816	3.97121	-1.06669	2.14265	0.0321413	0.244186	no
Glyma01g03340	Glyma01g03340	Glyma01g03340	Gm01:2843206-2846996	ws82-0	ws82-7	NOTEST	0	0	0	0	1	1	no
Glyma01g03360	Glyma01g03360	Glyma01g03360	Gm01:2857640-2860816	ws82-0	ws82-7	OK	23.1405	12.6828	-0.867545	1.70154	0.0888409	0.416568	no
Glyma01g03371	Glyma01g03371	Glyma01g03371	Gm01:2868081-2871591	ws82-0	ws82-7	NOTEST	0.227915	0.0348762	-2.70818	1.14558	0.25197	1	no
Glyma01g03380	Glyma01g03380	Glyma01g03380	Gm01:2872827-2875983	ws82-0	ws82-7	OK	5.52888	6.77421	0.293065	-0.556893	0.5776	0.864632	no
Glyma01g03390	Glyma01g03390	Glyma01g03390	Gm01:2879282-2884236	ws82-0	ws82-7	OK	0.818212	0.881655	0.107739	-0.160726	0.87231	0.968592	no
Glyma01g03400	Glyma01g03400	Glyma01g03400	Gm01:2895941-2899203	ws82-0	ws82-7	NOTEST	0.035617	0.090371	1.34329	-0.876192	0.380925	1	no
Glyma01g03410	Glyma01g03410	Glyma01g03410	Gm01:2907608-2911173	ws82-0	ws82-7	NOTEST	0	0	0	0	1	1	no
Glyma01g03420	Glyma01g03420	Glyma01g03420	Gm01:2912689-2918182	ws82-0	ws82-7	OK	2.64191	1.34981	-0.968825	1.64451	0.100071	0.440452	no
Glyma01g03430	Glyma01g03430	Glyma01g03430	Gm01:2918596-2922169	ws82-0	ws82-7	OK	2.84187	4.37188	0.621413	-1.03996	0.298358	0.691729	no
Glyma01g03450	Glyma01g03450	Glyma01g03450	Gm01:2932298-2941083	ws82-0	ws82-7	NOTEST	0	0	0	0	1	1	no
Glyma01g03470	Glyma01g03470	Glyma01g03470	Gm01:2983533-2985063	ws82-0	ws82-7	OK	2.95257	2.6831	-0.138072	0.206078	0.83673	0.959031	no
Glyma01g03480	Glyma01g03480	Glyma01g03480	Gm01:2985878-2990726	ws82-0	ws82-7	OK	1.59623	1.43325	-0.155379	0.259271	0.795426	0.947541	no
Glyma01g03490	Glyma01g03490	Glyma01g03490	Gm01:2997710-3004125	ws82-0	ws82-7	OK	7.24268	5.42268	-0.417517	0.877089	0.380438	0.753711	no
Glyma01g03500	Glyma01g03500	Glyma01g03500	Gm01:3020777-3022182	ws82-0	ws82-7	OK	35.3716	19.1928	-0.882022	1.85119	0.0641425	0.352158	no
Glyma01g03530	Glyma01g03530	Glyma01g03530	Gm01:3043747-3048064	ws82-0	ws82-7	OK	18.158	9.82996	-0.88535	1.86883	0.0616469	0.344721	no
Glyma01g03540	Glyma01g03540	Glyma01g03540	Gm01:3063216-3065991	ws82-0	ws82-7	OK	10.7548	6.39807	-0.749267	1.50983	0.131088	0.496418	no
Glyma01g03550	Glyma01g03550	Glyma01g03550	Gm01:3067764-3073752	ws82-0	ws82-7	OK	23.6789	22.2487	-0.0898786	0.190294	0.849079	0.962534	no
Glyma01g03570	Glyma01g03570	Glyma01g03570	Gm01:3082363-3083185	ws82-0	ws82-7	OK	112.264	125.858	0.164899	-0.333585	0.738692	0.927068	no
Glyma01g03580	Glyma01g03580	Glyma01g03580	Gm01:3090805-3093412	ws82-0	ws82-7	NOTEST	0.149387	0.319379	1.09621	-1.0788	0.280678	1	no
Glyma01g03590	Glyma01g03590	Glyma01g03590	Gm01:3106546-3108525	ws82-0	ws82-7	OK	10.5618	16.6766	0.658963	-1.26995	0.204101	0.598171	no
Glyma01g03600	Glyma01g03600	Glyma01g03600	Gm01:3114320-3119083	ws82-0	ws82-7	OK	6.76967	5.84843	-0.211035	0.382773	0.701888	0.914084	no
Glyma01g03610	Glyma01g03610	Glyma01g03610	Gm01:3120584-3124029	ws82-0	ws82-7	OK	25.3058	12.6159	-1.00423	2.11663	0.0342916	0.253308	no
Glyma01g03621	Glyma01g03621	Glyma01g03621	Gm01:3124253-3126137	ws82-0	ws82-7	OK	0.460407	0.921412	1.00094	-1.239	0.215346	0.611055	no
Glyma01g03630	Glyma01g03630	Glyma01g03630	Gm01:3127061-3127831	ws82-0	ws82-7	NOTEST	0	0	0	0	1	1	no
Glyma01g03650	Glyma01g03650	Glyma01g03650	Gm01:3132200-3135385	ws82-0	ws82-7	OK	39.6641	29.8912	-0.408112	0.795546	0.426296	0.783094	no
Glyma01g03661	Glyma01g03661	Glyma01g03661	Gm01:3135687-3141621	ws82-0	ws82-7	NOTEST	0	0.0288596	1.79769e+308	1.79769e+308	0.28282	1	no
Glyma01g03670	Glyma01g03670	Glyma01g03670	Gm01:3144701-3145778	ws82-0	ws82-7	OK	0.396416	0.63176	0.672361	-0.793861	0.427276	0.78371	no
Glyma01g03690	Glyma01g03690	Glyma01g03690	Gm01:3152038-3157769	ws82-0	ws82-7	NOTEST	0	0	0	0	1	1	no
Glyma01g03700	Glyma01g03700	Glyma01g03700	Gm01:3162858-3164334	ws82-0	ws82-7	OK	3.7769	3.39309	-0.154605	0.28732	0.773867	0.939551	no
Glyma01g03710	Glyma01g03710	Glyma01g03710	Gm01:3167711-3172458	ws82-0	ws82-7	OK	10.1439	4.55102	-1.15635	2.1509	0.031484	0.241455	no
Glyma01g03720	Glyma01g03720	Glyma01g03720	Gm01:3174000-3185126	ws82-0	ws82-7	OK	54.3585	54.1837	-0.00464827	0.00879556	0.992982	0.998358	no
Glyma01g03730	Glyma01g03730	Glyma01g03730	Gm01:3187344-3190927	ws82-0	ws82-7	OK	12.1684	13.0379	0.0995819	-0.203774	0.83853	0.959318	no
Glyma01g03750	Glyma01g03750	Glyma01g03750	Gm01:3193903-3200492	ws82-0	ws82-7	OK	16.3499	15.8814	-0.0419481	0.0881281	0.929775	0.983951	no
Glyma01g03760	Glyma01g03760	Glyma01g03760	Gm01:3219159-3222449	ws82-0	ws82-7	OK	5.10021	8.9167	0.805953	-1.69533	0.090013	0.419491	no
Glyma01g03780	Glyma01g03780	Glyma01g03780	Gm01:3233213-3235819	ws82-0	ws82-7	OK	3.25841	7.61196	1.2241	-1.41716	0.156437	0.536822	no
Glyma01g03790	Glyma01g03790	Glyma01g03790	Gm01:3242605-3245458	ws82-0	ws82-7	NOTEST	0.0952763	0.0525994	-0.857071	0.822257	0.410931	1	no
Glyma01g03810	Glyma01g03810	Glyma01g03810	Gm01:3249405-3255967	ws82-0	ws82-7	OK	19.3593	40.4266	1.06228	-1.93545	0.0529354	0.319439	no
Glyma01g03820	Glyma01g03820	Glyma01g03820	Gm01:3263267-3267637	ws82-0	ws82-7	OK	3.17247	3.04392	-0.0596753	0.113071	0.909974	0.980157	no
Glyma01g03830	Glyma01g03830	Glyma01g03830	Gm01:3283632-3286899	ws82-0	ws82-7	OK	5.87861	4.69354	-0.3248	0.621885	0.534017	0.843278	no
Glyma01g03850	Glyma01g03850	Glyma01g03850	Gm01:3312867-3318968	ws82-0	ws82-7	OK	10.0487	2.52771	-1.9911	3.81666	0.000135268	0.00593146	yes
Glyma01g03870	Glyma01g03870	Glyma01g03870	Gm01:3327064-3332585	ws82-0	ws82-7	OK	9.38447	3.39226	-1.46803	3.02993	0.00244611	0.0491261	yes
Glyma01g03880	Glyma01g03880	Glyma01g03880	Gm01:3348917-3352335	ws82-0	ws82-7	OK	0.521536	1.78338	1.77378	-2.73159	0.00630304	0.0903408	no
Glyma01g03890	Glyma01g03890	Glyma01g03890	Gm01:3359534-3372620	ws82-0	ws82-7	OK	4.07446	3.45239	-0.239012	0.490835	0.623543	0.883521	no
Glyma01g03900	Glyma01g03900	Glyma01g03900	Gm01:3378305-3380122	ws82-0	ws82-7	NOTEST	0.10814	0.142316	0.396187	-0.3837	0.701201	1	no
Glyma01g03910	Glyma01g03910	Glyma01g03910	Gm01:3381988-3384388	ws82-0	ws82-7	NOTEST	0.169005	0.297618	0.816393	-0.871698	0.383373	1	no
Glyma01g03921	Glyma01g03921	Glyma01g03921	Gm01:3390102-3396781	ws82-0	ws82-7	NOTEST	0.25588	0.096699	-1.40389	1.5381	0.124024	1	no
Glyma01g03930	Glyma01g03930	Glyma01g03930	Gm01:3400476-3411080	ws82-0	ws82-7	OK	9.88642	9.62652	-0.0384332	0.0813621	0.935154	0.985343	no
Glyma01g03940	Glyma01g03940	Glyma01g03940	Gm01:3413504-3415979	ws82-0	ws82-7	OK	0.607712	1.17234	0.947925	-1.34887	0.17738	0.566489	no
Glyma01g03948	Glyma01g03948	Glyma01g03948	Gm01:3423773-3425166	ws82-0	ws82-7	OK	1.16197	0.638486	-0.863845	1.0329	0.301652	0.694891	no
Glyma01g03956	Glyma01g03956	Glyma01g03956	Gm01:3431068-3433014	ws82-0	ws82-7	OK	2.87172	1.16162	-1.30578	1.90736	0.0564744	0.33176	no
Glyma01g03964	Glyma01g03964	Glyma01g03964	Gm01:3433091-3436594	ws82-0	ws82-7	OK	0.440091	0.271458	-0.697073	0.9272	0.353822	0.736864	no
Glyma01g03972	Glyma01g03972	Glyma01g03972	Gm01:3439667-3441084	ws82-0	ws82-7	NOTEST	0	0	0	0	1	1	no
Glyma01g03980	Glyma01g03980	Glyma01g03980	Gm01:3455191-3461955	ws82-0	ws82-7	NOTEST	0.343526	0.169568	-1.01855	1.40635	0.159622	1	no
Glyma01g04000	Glyma01g04000	Glyma01g04000	Gm01:3487914-3494204	ws82-0	ws82-7	OK	6.55868	3.50334	-0.904674	1.90366	0.0569546	0.333343	no
Glyma01g04015	Glyma01g04015	Glyma01g04015	Gm01:3502393-3507947	ws82-0	ws82-7	NOTEST	0	0	0	0	1	1	no
Glyma01g04030	Glyma01g04030	Glyma01g04030	Gm01:3513144-3513438	ws82-0	ws82-7	NOTEST	0	0	0	0	1	1	no
Glyma01g04040	Glyma01g04040	Glyma01g04040	Gm01:3514698-3521382	ws82-0	ws82-7	OK	1.06894	0.732883	-0.544531	0.718655	0.472353	0.813074	no
Glyma01g04050	Glyma01g04050	Glyma01g04050	Gm01:3524004-3527778	ws82-0	ws82-7	OK	56.369	49.8811	-0.17641	0.368137	0.712771	0.917872	no
Glyma01g04060	Glyma01g04060	Glyma01g04060	Gm01:3533389-3537718	ws82-0	ws82-7	OK	3.41644	6.13037	0.843482	-1.57815	0.11453	0.47026	no
Glyma01g04070	Glyma01g04070	Glyma01g04070	Gm01:3541049-3543307	ws82-0	ws82-7	OK	10.6904	13.5534	0.342335	-0.68096	0.495897	0.823843	no
Glyma01g04080	Glyma01g04080	Glyma01g04080	Gm01:3552334-3560811	ws82-0	ws82-7	OK	0.447256	0.731116	0.708998	-0.314931	0.752814	0.931226	no
Glyma01g04090	Glyma01g04090	Glyma01g04090	Gm01:3552334-3560811	ws82-0	ws82-7	OK	8.64697	15.2416	0.817748	-1.59084	0.111646	0.465375	no
Glyma01g04100	Glyma01g04100	Glyma01g04100	Gm01:3565109-3567816	ws82-0	ws82-7	OK	2.36062	2.94321	0.318224	-0.586334	0.557651	0.855935	no
Glyma01g04107	Glyma01g04107	Glyma01g04107	Gm01:3570498-3572031	ws82-0	ws82-7	OK	0.588694	0.637422	0.114731	-0.141337	0.887604	0.973288	no
Glyma01g04114	Glyma01g04114	Glyma01g04114	Gm01:3573892-3576381	ws82-0	ws82-7	NOTEST	0	0	0	0	1	1	no
Glyma01g04122	Glyma01g04122	Glyma01g04122	Gm01:3576871-3579242	ws82-0	ws82-7	OK	0.550876	0.394303	-0.482424	0.62075	0.534764	0.843504	no
Glyma01g04130	Glyma01g04130	Glyma01g04130	Gm01:3588235-3590927	ws82-0	ws82-7	OK	22.3288	35.8532	0.683198	-1.42985	0.152761	0.53023	no
Glyma01g04140	Glyma01g04140	Glyma01g04140	Gm01:3593852-3595627	ws82-0	ws82-7	OK	4.07773	5.99734	0.556556	-1.01717	0.309073	0.70166	no
Glyma01g04151	Glyma01g04151	Glyma01g04151	Gm01:3601850-3604249	ws82-0	ws82-7	OK	1.61658	1.21372	-0.413512	0.643109	0.520153	0.836747	no
Glyma01g04160	Glyma01g04160	Glyma01g04160	Gm01:3614505-3619208	ws82-0	ws82-7	NOTEST	0	0.0192173	1.79769e+308	1.79769e+308	0.272745	1	no
Glyma01g04170	Glyma01g04170	Glyma01g04170	Gm01:3622380-3627999	ws82-0	ws82-7	OK	8.84758	18.7873	1.0864	-1.92774	0.0538877	0.322702	no
Glyma01g04190	Glyma01g04190	Glyma01g04190	Gm01:3657972-3659933	ws82-0	ws82-7	OK	3.98162	2.67901	-0.571654	0.997528	0.318508	0.710222	no
Glyma01g04200	Glyma01g04200	Glyma01g04200	Gm01:3671722-3676091	ws82-0	ws82-7	NOTEST	0.0502039	0.0305315	-0.717502	0.601955	0.547204	1	no
Glyma01g04210	Glyma01g04210	Glyma01g04210	Gm01:3695969-3699966	ws82-0	ws82-7	LOWDATA	0.280413	0.323451	0.205996	0	1	1	no
Glyma01g04220	Glyma01g04220	Glyma01g04220	Gm01:3695969-3699966	ws82-0	ws82-7	OK	0.610941	0.0621047	-3.29826	3.17737	0.00148619	0.0349596	yes
Glyma01g04230	Glyma01g04230	Glyma01g04230	Gm01:3717479-3721262	ws82-0	ws82-7	OK	7.57406	6.93813	-0.126521	0.261604	0.793627	0.94661	no
Glyma01g04241	Glyma01g04241	Glyma01g04241	Gm01:3734519-3735893	ws82-0	ws82-7	OK	0.262861	0.960483	1.86946	-2.285	0.0223131	0.197401	no
Glyma01g04250	Glyma01g04250	Glyma01g04250	Gm01:3750043-3752379	ws82-0	ws82-7	OK	2.09191	2.87309	0.457785	-0.833254	0.404701	0.770309	no
Glyma01g04261	Glyma01g04261	Glyma01g04261	Gm01:3767622-3769840	ws82-0	ws82-7	NOTEST	0	0	0	0	1	1	no
Glyma01g04270	Glyma01g04270	Glyma01g04270	Gm01:3770398-3790851	ws82-0	ws82-7	OK	6.39099	7.54932	0.240308	-0.475438	0.634475	0.886563	no
Glyma01g04285	Glyma01g04285	Glyma01g04285	Gm01:3792928-3793735	ws82-0	ws82-7	OK	0.942112	0.445415	-1.08075	1.16316	0.244763	0.641354	no
Glyma01g04300	Glyma01g04300	Glyma01g04300	Gm01:3800482-3805133	ws82-0	ws82-7	OK	7.56165	5.582	-0.437919	0.834667	0.403905	0.770091	no
Glyma01g04310	Glyma01g04310	Glyma01g04310	Gm01:3839061-3840278	ws82-0	ws82-7	NOTEST	0	0	0	0	1	1	no
Glyma01g04320	Glyma01g04320	Glyma01g04320	Gm01:3843990-3851452	ws82-0	ws82-7	OK	10.4829	8.40237	-0.319176	0.64648	0.517969	0.83573	no
Glyma01g04330	Glyma01g04330	Glyma01g04330	Gm01:3875178-3876239	ws82-0	ws82-7	OK	0.629675	0.599006	-0.0720349	0.0702377	0.944004	0.987624	no
Glyma01g04335	Glyma01g04335	Glyma01g04335	Gm01:3875178-3876239	ws82-0	ws82-7	OK	4.01073	1.36234	-1.55778	0.563066	0.57339	0.861978	no
Glyma01g04340	Glyma01g04340	Glyma01g04340	Gm01:3894968-3896837	ws82-0	ws82-7	OK	0.800833	1.71587	1.09937	-1.66399	0.0961145	0.432791	no
Glyma01g04350	Glyma01g04350	Glyma01g04350	Gm01:3901049-3902869	ws82-0	ws82-7	OK	11.0764	15.533	0.487846	-1.02875	0.303597	0.6966	no
Glyma01g04361	Glyma01g04361	Glyma01g04361	Gm01:3905975-3906745	ws82-0	ws82-7	NOTEST	0	0	0	0	1	1	no
Glyma01g04370	Glyma01g04370	Glyma01g04370	Gm01:3910797-3912019	ws82-0	ws82-7	NOTEST	0.134756	0.155802	0.209365	-0.198693	0.842503	1	no
Glyma01g04380	Glyma01g04380	Glyma01g04380	Gm01:3925166-3926952	ws82-0	ws82-7	OK	1.32841	1.01021	-0.395048	0.600494	0.548177	0.850661	no
Glyma01g04400	Glyma01g04400	Glyma01g04400	Gm01:3936729-3941417	ws82-0	ws82-7	OK	14.6151	9.92757	-0.557945	1.17909	0.238362	0.635289	no
Glyma01g04410	Glyma01g04410	Glyma01g04410	Gm01:3950636-3955032	ws82-0	ws82-7	OK	2.29949	2.16994	-0.083659	0.13928	0.889229	0.973567	no
Glyma01g04421	Glyma01g04421	Glyma01g04421	Gm01:3965515-3967099	ws82-0	ws82-7	OK	0.263205	0.390765	0.570114	-0.626014	0.531306	0.842133	no
Glyma01g04430	Glyma01g04430	Glyma01g04430	Gm01:3981173-3984324	ws82-0	ws82-7	NOTEST	0.224742	0.0230101	-3.28793	2.61366	0.0089578	1	no
Glyma01g04440	Glyma01g04440	Glyma01g04440	Gm01:3984541-3989981	ws82-0	ws82-7	OK	6.11082	4.90446	-0.317272	0.619009	0.53591	0.843975	no
Glyma01g04450	Glyma01g04450	Glyma01g04450	Gm01:3990476-3991986	ws82-0	ws82-7	OK	0.762016	0.645615	-0.239148	0.311701	0.755268	0.93262	no
Glyma01g04460	Glyma01g04460	Glyma01g04460	Gm01:3993484-3995564	ws82-0	ws82-7	OK	8.39961	13.5187	0.686559	-1.44985	0.147101	0.520742	no
Glyma01g04468	Glyma01g04468	Glyma01g04468	Gm01:4005281-4011408	ws82-0	ws82-7	OK	0.373315	0.428433	0.198676	-0.219887	0.825959	0.956146	no
Glyma01g04476	Glyma01g04476	Glyma01g04476	Gm01:4012612-4020206	ws82-0	ws82-7	OK	5.4843	4.45935	-0.298474	0.629271	0.529172	0.840997	no
Glyma01g04484	Glyma01g04484	Glyma01g04484	Gm01:4023641-4024312	ws82-0	ws82-7	OK	9.38069	10.984	0.227635	-0.371462	0.710294	0.916888	no
Glyma01g04492	Glyma01g04492	Glyma01g04492	Gm01:4024327-4035566	ws82-0	ws82-7	OK	8.30718	3.87853	-1.09885	2.31545	0.0205883	0.18805	no
Glyma01g04500	Glyma01g04500	Glyma01g04500	Gm01:4070066-4074636	ws82-0	ws82-7	OK	0.748891	0.743516	-0.0103924	0.0164275	0.986893	0.997487	no
Glyma01g04515	Glyma01g04515	Glyma01g04515	Gm01:4094045-4096371	ws82-0	ws82-7	OK	3.36156	3.2871	-0.0323174	0.0644021	0.94865	0.988432	no
Glyma01g04530	Glyma01g04530	Glyma01g04530	Gm01:4108620-4111438	ws82-0	ws82-7	OK	29.9401	63.6194	1.08739	-2.21551	0.026725	0.220364	no
Glyma01g04545	Glyma01g04545	Glyma01g04545	Gm01:4119639-4119995	ws82-0	ws82-7	NOTEST	0	0	0	0	1	1	no
Glyma01g04560	Glyma01g04560	Glyma01g04560	Gm01:4134768-4138744	ws82-0	ws82-7	OK	4.7259	5.27403	0.158317	-0.282492	0.777566	0.940694	no
Glyma01g04570	Glyma01g04570	Glyma01g04570	Gm01:4140494-4144862	ws82-0	ws82-7	OK	11.1311	7.60065	-0.550399	1.07317	0.283197	0.678585	no
Glyma01g04580	Glyma01g04580	Glyma01g04580	Gm01:4160568-4163236	ws82-0	ws82-7	OK	3.0188	1.4068	-1.10156	1.78135	0.0748553	0.382059	no
Glyma01g04590	Glyma01g04590	Glyma01g04590	Gm01:4190455-4199176	ws82-0	ws82-7	OK	1.01252	0.917224	-0.142604	0.256705	0.797406	0.948053	no
Glyma01g04600	Glyma01g04600	Glyma01g04600	Gm01:4213202-4215294	ws82-0	ws82-7	OK	11.2441	10.901	-0.044705	0.0888375	0.929211	0.983951	no
Glyma01g04610	Glyma01g04610	Glyma01g04610	Gm01:4217440-4221353	ws82-0	ws82-7	OK	2.74596	3.61909	0.398314	-0.678401	0.497518	0.824721	no
Glyma01g04616	Glyma01g04616	Glyma01g04616	Gm01:4234777-4236309	ws82-0	ws82-7	NOTEST	0	0	0	0	1	1	no
Glyma01g04623	Glyma01g04623	Glyma01g04623	Gm01:4248628-4253094	ws82-0	ws82-7	NOTEST	0	0.0466305	1.79769e+308	1.79769e+308	0.124107	1	no
Glyma01g04630	Glyma01g04630	Glyma01g04630	Gm01:4267486-4273671	ws82-0	ws82-7	OK	0.42768	0.898801	1.07147	-1.57496	0.115265	0.471644	no
Glyma01g04640	Glyma01g04640	Glyma01g04640	Gm01:4278592-4280521	ws82-0	ws82-7	NOTEST	0.0300768	0.0989911	1.71865	-1.14516	0.252144	1	no
Glyma01g04650	Glyma01g04650	Glyma01g04650	Gm01:4282743-4288290	ws82-0	ws82-7	NOTEST	0	0	0	0	1	1	no
Glyma01g04660	Glyma01g04660	Glyma01g04660	Gm01:4294494-4299400	ws82-0	ws82-7	OK	0.673771	0.822393	0.28757	-0.416368	0.677141	0.902981	no
Glyma01g04670	Glyma01g04670	Glyma01g04670	Gm01:4302121-4303918	ws82-0	ws82-7	OK	0.763602	0.768803	0.00979304	-0.0128968	0.98971	0.997716	no
Glyma01g04690	Glyma01g04690	Glyma01g04690	Gm01:4314360-4316230	ws82-0	ws82-7	OK	13.363	6.3438	-1.07483	2.14362	0.0320637	0.24418	no
Glyma01g04700	Glyma01g04700	Glyma01g04700	Gm01:4319542-4321677	ws82-0	ws82-7	NOTEST	0	0	0	0	1	1	no
Glyma01g04710	Glyma01g04710	Glyma01g04710	Gm01:4323773-4325439	ws82-0	ws82-7	OK	177.148	231.723	0.387448	-0.755274	0.450085	0.79934	no
Glyma01g04720	Glyma01g04720	Glyma01g04720	Gm01:4331150-4337114	ws82-0	ws82-7	OK	7.53004	5.43288	-0.470942	0.903973	0.36601	0.745613	no
Glyma01g04730	Glyma01g04730	Glyma01g04730	Gm01:4347876-4356892	ws82-0	ws82-7	OK	7.99172	2.55009	-1.64796	3.33008	0.000868209	0.0242093	yes
Glyma01g04740	Glyma01g04740	Glyma01g04740	Gm01:4358996-4361499	ws82-0	ws82-7	OK	1.33619	1.89569	0.504602	-0.780663	0.435001	0.78952	no
Glyma01g04750	Glyma01g04750	Glyma01g04750	Gm01:4367348-4370072	ws82-0	ws82-7	OK	0.822416	0.366408	-1.16642	1.50291	0.132861	0.499314	no
Glyma01g04760	Glyma01g04760	Glyma01g04760	Gm01:4370091-4371490	ws82-0	ws82-7	OK	45.0566	41.4883	-0.119034	0.251877	0.801137	0.948822	no
Glyma01g04770	Glyma01g04770	Glyma01g04770	Gm01:4372756-4380517	ws82-0	ws82-7	NOTEST	0	0	0	0	1	1	no
Glyma01g04780	Glyma01g04780	Glyma01g04780	Gm01:4372756-4380517	ws82-0	ws82-7	NOTEST	0.200614	0	-1.79769e+308	-1.79769e+308	0.186913	1	no
Glyma01g04791	Glyma01g04791	Glyma01g04791	Gm01:4372756-4380517	ws82-0	ws82-7	NOTEST	0.116264	0.242233	1.059	-1.32489	0.185207	1	no
Glyma01g04800	Glyma01g04800	Glyma01g04800	Gm01:4381634-4382677	ws82-0	ws82-7	NOTEST	0	0	0	0	1	1	no
Glyma01g04810	Glyma01g04810	Glyma01g04810	Gm01:4398540-4400009	ws82-0	ws82-7	NOTEST	0	0	0	0	1	1	no
Glyma01g04820	Glyma01g04820	Glyma01g04820	Gm01:4406613-4412858	ws82-0	ws82-7	OK	9.12393	6.80576	-0.422899	0.89291	0.371905	0.748464	no
Glyma01g04830	Glyma01g04830	Glyma01g04830	Gm01:4435158-4439690	ws82-0	ws82-7	OK	16.5281	3.18503	-2.37554	4.74698	2.06474e-06	0.00021313	yes
Glyma01g04860	Glyma01g04860	Glyma01g04860	Gm01:4462980-4471168	ws82-0	ws82-7	OK	2.89407	4.5606	0.656123	-1.30177	0.192996	0.585349	no
Glyma01g04870	Glyma01g04870	Glyma01g04870	Gm01:4462980-4471168	ws82-0	ws82-7	NOTEST	0.0330259	0.107026	1.69628	-0.284132	0.77631	1	no
Glyma01g04880	Glyma01g04880	Glyma01g04880	Gm01:4472509-4474524	ws82-0	ws82-7	OK	16.0432	8.26169	-0.957453	1.95358	0.0507513	0.312499	no
Glyma01g04890	Glyma01g04890	Glyma01g04890	Gm01:4508033-4510800	ws82-0	ws82-7	OK	22.5131	17.4726	-0.365673	0.706372	0.479957	0.816543	no
Glyma01g04895	Glyma01g04895	Glyma01g04895	Gm01:4537147-4539699	ws82-0	ws82-7	NOTEST	0	0	0	0	1	1	no
Glyma01g04900	Glyma01g04900	Glyma01g04900	Gm01:4581543-4588129	ws82-0	ws82-7	OK	5.23116	5.03757	-0.0544044	0.0975307	0.922305	0.98233	no
Glyma01g04920	Glyma01g04920	Glyma01g04920	Gm01:4591469-4596424	ws82-0	ws82-7	OK	61.3423	30.6702	-1.00004	1.86496	0.062187	0.346227	no
Glyma01g04930	Glyma01g04930	Glyma01g04930	Gm01:4617117-4621351	ws82-0	ws82-7	OK	18.0504	7.22486	-1.32099	2.5737	0.0100617	0.121082	no
Glyma01g04940	Glyma01g04940	Glyma01g04940	Gm01:4623827-4626604	ws82-0	ws82-7	NOTEST	0	0	0	0	1	1	no
Glyma01g04950	Glyma01g04950	Glyma01g04950	Gm01:4628266-4630966	ws82-0	ws82-7	NOTEST	0	0	0	0	1	1	no
Glyma01g04970	Glyma01g04970	Glyma01g04970	Gm01:4642856-4646062	ws82-0	ws82-7	NOTEST	0	0	0	0	1	1	no
Glyma01g04980	Glyma01g04980	Glyma01g04980	Gm01:4649145-4655506	ws82-0	ws82-7	OK	25.2649	13.441	-0.910489	1.81074	0.0701814	0.368894	no
Glyma01g04991	Glyma01g04991	Glyma01g04991	Gm01:4658655-4660266	ws82-0	ws82-7	OK	1.02011	0.757705	-0.429014	0.621716	0.534128	0.843278	no
Glyma01g05000	Glyma01g05000	Glyma01g05000	Gm01:4661267-4665903	ws82-0	ws82-7	OK	5.70099	4.80353	-0.247118	0.455468	0.648772	0.891696	no
Glyma01g05020	Glyma01g05020	Glyma01g05020	Gm01:4671907-4672948	ws82-0	ws82-7	NOTEST	0	0.0836467	1.79769e+308	1.79769e+308	0.0765423	1	no
Glyma01g05035	Glyma01g05035	Glyma01g05035	Gm01:4674370-4675308	ws82-0	ws82-7	NOTEST	0	0	0	0	1	1	no
Glyma01g05050	Glyma01g05050	Glyma01g05050	Gm01:4685833-4692108	ws82-0	ws82-7	NOTEST	0	0	0	0	1	1	no
Glyma01g05060	Glyma01g05060	Glyma01g05060	Gm01:4706315-4710196	ws82-0	ws82-7	NOTEST	0.0358133	0	-1.79769e+308	-1.79769e+308	0.241158	1	no
Glyma01g05070	Glyma01g05070	Glyma01g05070	Gm01:4710246-4716428	ws82-0	ws82-7	NOTEST	0	0	0	0	1	1	no
Glyma01g05080	Glyma01g05080	Glyma01g05080	Gm01:4729092-4732808	ws82-0	ws82-7	OK	5.55587	2.49756	-1.15349	1.8913	0.0585846	0.337674	no
Glyma01g05090	Glyma01g05090	Glyma01g05090	Gm01:4733168-4736974	ws82-0	ws82-7	NOTEST	0.0698355	0.0301138	-1.21354	0.68792	0.491503	1	no
Glyma01g05100	Glyma01g05100	Glyma01g05100	Gm01:4750064-4755456	ws82-0	ws82-7	OK	1.72087	2.57598	0.581979	-1.06014	0.289082	0.684434	no
Glyma01g05110	Glyma01g05110	Glyma01g05110	Gm01:4767629-4768506	ws82-0	ws82-7	NOTEST	0	0	0	0	1	1	no
Glyma01g05120	Glyma01g05120	Glyma01g05120	Gm01:4767629-4768506	ws82-0	ws82-7	NOTEST	0	0	0	0	1	1	no
Glyma01g05135	Glyma01g05135	Glyma01g05135	Gm01:4772497-4774260	ws82-0	ws82-7	NOTEST	0	0	0	0	1	1	no
Glyma01g05150	Glyma01g05150	Glyma01g05150	Gm01:4805906-4807682	ws82-0	ws82-7	OK	95.2478	122.811	0.366682	-0.737239	0.460977	0.805724	no
Glyma01g05160	Glyma01g05160	Glyma01g05160	Gm01:4822853-4826845	ws82-0	ws82-7	OK	7.61087	6.27359	-0.27877	0.577343	0.563707	0.857816	no
Glyma01g05170	Glyma01g05170	Glyma01g05170	Gm01:4850795-4854700	ws82-0	ws82-7	OK	6.68846	2.58574	-1.3711	2.5215	0.0116857	0.132518	no
Glyma01g05180	Glyma01g05180	Glyma01g05180	Gm01:4855329-4863296	ws82-0	ws82-7	NOTEST	0.00775354	0.095212	3.61822	-0.542646	0.587374	1	no
Glyma01g05190	Glyma01g05190	Glyma01g05190	Gm01:4855329-4863296	ws82-0	ws82-7	OK	0.492053	0.253215	-0.958453	1.22518	0.220506	0.61652	no
Glyma01g05220	Glyma01g05220	Glyma01g05220	Gm01:4891977-4893336	ws82-0	ws82-7	OK	71.7178	55.91	-0.359224	0.742434	0.457825	0.803578	no
Glyma01g05230	Glyma01g05230	Glyma01g05230	Gm01:4900381-4902743	ws82-0	ws82-7	OK	3.30729	2.54309	-0.379069	0.686729	0.492254	0.822022	no
Glyma01g05240	Glyma01g05240	Glyma01g05240	Gm01:4928138-4929616	ws82-0	ws82-7	OK	0.552361	0.200828	-1.45965	1.28074	0.200284	0.594467	no
Glyma01g05310	Glyma01g05310	Glyma01g05310	Gm01:4961751-4963489	ws82-0	ws82-7	NOTEST	0.0682285	0.049266	-0.469782	0.22755	0.819996	1	no
Glyma01g05321	Glyma01g05321	Glyma01g05321	Gm01:5005094-5010084	ws82-0	ws82-7	OK	1.85976	1.93812	0.0595386	-0.077598	0.938148	0.986307	no
Glyma01g05330	Glyma01g05330	Glyma01g05330	Gm01:5020413-5021405	ws82-0	ws82-7	NOTEST	0	0	0	0	1	1	no
Glyma01g05340	Glyma01g05340	Glyma01g05340	Gm01:5037886-5042760	ws82-0	ws82-7	OK	11.4639	5.74285	-0.997257	2.00495	0.0449688	0.292786	no
Glyma01g05350	Glyma01g05350	Glyma01g05350	Gm01:5083980-5085647	ws82-0	ws82-7	OK	19.0543	5.03172	-1.92099	3.81349	0.00013702	0.00597673	yes
Glyma01g05360	Glyma01g05360	Glyma01g05360	Gm01:5110798-5114049	ws82-0	ws82-7	OK	1.36905	1.50989	0.141266	-0.197018	0.843813	0.960841	no
Glyma01g05370	Glyma01g05370	Glyma01g05370	Gm01:5118887-5122289	ws82-0	ws82-7	OK	0.288401	1.0534	1.8689	-2.12247	0.0337985	0.251444	no
Glyma01g05390	Glyma01g05390	Glyma01g05390	Gm01:5164083-5165652	ws82-0	ws82-7	NOTEST	0	0	0	0	1	1	no
Glyma01g05410	Glyma01g05410	Glyma01g05410	Gm01:5213600-5216013	ws82-0	ws82-7	OK	18.0149	13.4403	-0.422618	0.889504	0.373732	0.749325	no
Glyma01g05430	Glyma01g05430	Glyma01g05430	Gm01:5252557-5258022	ws82-0	ws82-7	OK	3.45909	3.11989	-0.1489	0.265473	0.790645	0.945231	no
Glyma01g05435	Glyma01g05435	Glyma01g05435	Gm01:5252557-5258022	ws82-0	ws82-7	NOTEST	0	0	0	0	1	1	no
Glyma01g05440	Glyma01g05440	Glyma01g05440	Gm01:5263624-5268235	ws82-0	ws82-7	OK	2.6076	1.04968	-1.31277	2.1756	0.0295853	0.233023	no
Glyma01g05450	Glyma01g05450	Glyma01g05450	Gm01:5286387-5287671	ws82-0	ws82-7	OK	1.7583	0.783512	-1.16615	1.58086	0.11391	0.469484	no
Glyma01g05470	Glyma01g05470	Glyma01g05470	Gm01:5303846-5307805	ws82-0	ws82-7	OK	0.779238	2.25423	1.5325	-2.36408	0.0180749	0.173384	no
Glyma01g05490	Glyma01g05490	Glyma01g05490	Gm01:5313627-5317389	ws82-0	ws82-7	OK	8.58864	9.16967	0.0944399	-0.173219	0.862479	0.966393	no
Glyma01g05500	Glyma01g05500	Glyma01g05500	Gm01:5324074-5325556	ws82-0	ws82-7	NOTEST	0.144909	0.0232808	-2.63793	1.51144	0.130676	1	no
Glyma01g05521	Glyma01g05521	Glyma01g05521	Gm01:5332060-5334718	ws82-0	ws82-7	NOTEST	0	0	0	0	1	1	no
Glyma01g05540	Glyma01g05540	Glyma01g05540	Gm01:5339676-5347885	ws82-0	ws82-7	NOTEST	0.0380012	0.178493	2.23175	-1.07411	0.282774	1	no
Glyma01g05550	Glyma01g05550	Glyma01g05550	Gm01:5348570-5352305	ws82-0	ws82-7	OK	11.7619	7.87218	-0.579286	1.20284	0.229038	0.624663	no
Glyma01g05565	Glyma01g05565	Glyma01g05565	Gm01:5365957-5368432	ws82-0	ws82-7	OK	0.71905	0.466312	-0.624796	0.781762	0.434355	0.788837	no
Glyma01g05580	Glyma01g05580	Glyma01g05580	Gm01:5372439-5377697	ws82-0	ws82-7	OK	1.69238	1.97015	0.219255	-0.392146	0.694951	0.910814	no
Glyma01g05680	Glyma01g05680	Glyma01g05680	Gm01:5434961-5437325	ws82-0	ws82-7	NOTEST	0	0	0	0	1	1	no
Glyma01g05710	Glyma01g05710	Glyma01g05710	Gm01:5452126-5455897	ws82-0	ws82-7	NOTEST	0.0202215	0	-1.79769e+308	-1.79769e+308	0.135176	1	no
Glyma01g05740	Glyma01g05740	Glyma01g05740	Gm01:5471207-5473302	ws82-0	ws82-7	OK	28.3343	33.7741	0.253367	-0.536072	0.591909	0.87173	no
Glyma01g05750	Glyma01g05750	Glyma01g05750	Gm01:5490127-5498444	ws82-0	ws82-7	OK	12.2009	8.04316	-0.601149	1.22018	0.222397	0.61853	no
Glyma01g05760	Glyma01g05760	Glyma01g05760	Gm01:5490127-5498444	ws82-0	ws82-7	OK	3.84475	5.6974	0.567414	-0.304797	0.760521	0.934841	no
Glyma01g05765	Glyma01g05765	Glyma01g05765	Gm01:5500755-5503968	ws82-0	ws82-7	OK	1.2255	1.35173	0.141436	-0.193095	0.846885	0.961673	no
Glyma01g05770	Glyma01g05770	Glyma01g05770	Gm01:5507145-5510888	ws82-0	ws82-7	OK	0.763587	0.964721	0.33732	-0.435256	0.663377	0.897628	no
Glyma01g05775	Glyma01g05775	Glyma01g05775	Gm01:5515370-5518889	ws82-0	ws82-7	NOTEST	0	0	0	0	1	1	no
Glyma01g05780	Glyma01g05780	Glyma01g05780	Gm01:5532190-5532902	ws82-0	ws82-7	OK	0.417094	0.452572	0.117773	-0.11177	0.911006	0.980309	no
Glyma01g05800	Glyma01g05800	Glyma01g05800	Gm01:5536188-5540803	ws82-0	ws82-7	OK	22.9466	14.6993	-0.642527	1.35797	0.174472	0.563185	no
Glyma01g05805	Glyma01g05805	Glyma01g05805	Gm01:5546122-5546986	ws82-0	ws82-7	NOTEST	0.0721447	0.142393	0.980916	-0.612734	0.540053	1	no
Glyma01g05810	Glyma01g05810	Glyma01g05810	Gm01:5571757-5573352	ws82-0	ws82-7	OK	7.8128	7.47052	-0.0646318	0.131352	0.895497	0.975321	no
Glyma01g05820	Glyma01g05820	Glyma01g05820	Gm01:5576197-5588666	ws82-0	ws82-7	OK	7.97564	5.6712	-0.491947	0.721204	0.470784	0.812388	no
Glyma01g05830	Glyma01g05830	Glyma01g05830	Gm01:5591933-5594156	ws82-0	ws82-7	OK	0.289622	0.781914	1.43284	-1.94156	0.0521906	0.316788	no
Glyma01g05840	Glyma01g05840	Glyma01g05840	Gm01:5603554-5605881	ws82-0	ws82-7	NOTEST	0	0	0	0	1	1	no
Glyma01g05850	Glyma01g05850	Glyma01g05850	Gm01:5614232-5617834	ws82-0	ws82-7	NOTEST	0.1005	0.0657978	-0.611085	0.418597	0.67551	1	no
Glyma01g05860	Glyma01g05860	Glyma01g05860	Gm01:5646198-5652308	ws82-0	ws82-7	OK	2.16933	2.19022	0.0138247	-0.0259666	0.979284	0.995912	no
Glyma01g05871	Glyma01g05871	Glyma01g05871	Gm01:5655285-5657085	ws82-0	ws82-7	OK	0.0676785	1.00129	3.88701	-2.74524	0.00604675	0.0878033	no
Glyma01g05880	Glyma01g05880	Glyma01g05880	Gm01:5667408-5668624	ws82-0	ws82-7	OK	2.79289	5.14089	0.88026	-1.55202	0.120658	0.480408	no
Glyma01g05890	Glyma01g05890	Glyma01g05890	Gm01:5668699-5671152	ws82-0	ws82-7	NOTEST	0.0269579	0.358688	3.73395	-2.63169	0.00849626	1	no
Glyma01g05920	Glyma01g05920	Glyma01g05920	Gm01:5704147-5706648	ws82-0	ws82-7	OK	2.58989	3.3631	0.3769	-0.708608	0.478567	0.816257	no
Glyma01g05933	Glyma01g05933	Glyma01g05933	Gm01:5723315-5724248	ws82-0	ws82-7	NOTEST	0	0.0387391	1.79769e+308	1.79769e+308	0.183103	1	no
Glyma01g05946	Glyma01g05946	Glyma01g05946	Gm01:5726524-5728292	ws82-0	ws82-7	NOTEST	0	0.0397412	1.79769e+308	1.79769e+308	0.183103	1	no
Glyma01g05960	Glyma01g05960	Glyma01g05960	Gm01:5750258-5754433	ws82-0	ws82-7	OK	1.16792	0.716499	-0.704909	1.07995	0.280166	0.675662	no
Glyma01g05970	Glyma01g05970	Glyma01g05970	Gm01:5789076-5789854	ws82-0	ws82-7	NOTEST	0	0	0	0	1	1	no
Glyma01g05980	Glyma01g05980	Glyma01g05980	Gm01:5800710-5803197	ws82-0	ws82-7	NOTEST	0.0270721	0.0704654	1.38011	-0.900208	0.36801	1	no
Glyma01g05991	Glyma01g05991	Glyma01g05991	Gm01:5815181-5815856	ws82-0	ws82-7	OK	1.44776	0.7161	-1.01559	1.24646	0.212596	0.609118	no
Glyma01g06001	Glyma01g06001	Glyma01g06001	Gm01:5820213-5821125	ws82-0	ws82-7	NOTEST	0	0	0	0	1	1	no
Glyma01g06010	Glyma01g06010	Glyma01g06010	Gm01:5849676-5850474	ws82-0	ws82-7	OK	2.97906	3.94748	0.406076	-0.642929	0.52027	0.836863	no
Glyma01g06030	Glyma01g06030	Glyma01g06030	Gm01:5873668-5876124	ws82-0	ws82-7	OK	32.8079	180.37	2.45884	-4.76736	1.86656e-06	0.000196316	yes
Glyma01g06060	Glyma01g06060	Glyma01g06060	Gm01:5950520-5957354	ws82-0	ws82-7	OK	2.49301	2.66359	0.0954832	-0.154078	0.877548	0.9703	no
Glyma01g06080	Glyma01g06080	Glyma01g06080	Gm01:5980779-5983675	ws82-0	ws82-7	OK	10.0786	5.4489	-0.887263	1.7182	0.0857607	0.409204	no
Glyma01g06091	Glyma01g06091	Glyma01g06091	Gm01:6001894-6002536	ws82-0	ws82-7	NOTEST	0	0	0	0	1	1	no
Glyma01g06101	Glyma01g06101	Glyma01g06101	Gm01:6012889-6016913	ws82-0	ws82-7	NOTEST	0	0	0	0	1	1	no
Glyma01g06110	Glyma01g06110	Glyma01g06110	Gm01:6012889-6016913	ws82-0	ws82-7	OK	159.757	92.3322	-0.790975	1.55069	0.120975	0.480747	no
Glyma01g06121	Glyma01g06121	Glyma01g06121	Gm01:6021842-6025894	ws82-0	ws82-7	NOTEST	0	0	0	0	1	1	no
Glyma01g06131	Glyma01g06131	Glyma01g06131	Gm01:6027072-6027783	ws82-0	ws82-7	NOTEST	0	0	0	0	1	1	no
Glyma01g06140	Glyma01g06140	Glyma01g06140	Gm01:6036836-6042396	ws82-0	ws82-7	NOTEST	0	0	0	0	1	1	no
Glyma01g06150	Glyma01g06150	Glyma01g06150	Gm01:6047154-6049059	ws82-0	ws82-7	OK	6.56862	1.30448	-2.33211	3.88639	0.000101745	0.00475639	yes
Glyma01g06170	Glyma01g06170	Glyma01g06170	Gm01:6071138-6081550	ws82-0	ws82-7	OK	11.011	21.581	0.970819	-1.9836	0.047301	0.300942	no
Glyma01g06181	Glyma01g06181	Glyma01g06181	Gm01:6100672-6102037	ws82-0	ws82-7	NOTEST	0	0	0	0	1	1	no
Glyma01g06192	Glyma01g06192	Glyma01g06192	Gm01:6238679-6240315	ws82-0	ws82-7	NOTEST	0	0	0	0	1	1	no
Glyma01g06203	Glyma01g06203	Glyma01g06203	Gm01:6266528-6267750	ws82-0	ws82-7	NOTEST	0	0	0	0	1	1	no
Glyma01g06214	Glyma01g06214	Glyma01g06214	Gm01:6283658-6285214	ws82-0	ws82-7	NOTEST	0	0	0	0	1	1	no
Glyma01g06226	Glyma01g06226	Glyma01g06226	Gm01:6285502-6288118	ws82-0	ws82-7	NOTEST	0	0	0	0	1	1	no
Glyma01g06238	Glyma01g06238	Glyma01g06238	Gm01:6291503-6292208	ws82-0	ws82-7	NOTEST	0	0	0	0	1	1	no
Glyma01g06250	Glyma01g06250	Glyma01g06250	Gm01:6303783-6304910	ws82-0	ws82-7	NOTEST	0	0	0	0	1	1	no
Glyma01g06255	Glyma01g06255	Glyma01g06255	Gm01:6305430-6306253	ws82-0	ws82-7	NOTEST	0	0	0	0	1	1	no
Glyma01g06260	Glyma01g06260	Glyma01g06260	Gm01:6314251-6321822	ws82-0	ws82-7	OK	7.65478	8.73383	0.190253	-0.353793	0.723494	0.921832	no
Glyma01g06265	Glyma01g06265	Glyma01g06265	Gm01:6323487-6330290	ws82-0	ws82-7	OK	0.41676	0.401381	-0.054245	0.0848577	0.932375	0.984328	no
Glyma01g06270	Glyma01g06270	Glyma01g06270	Gm01:6353278-6357024	ws82-0	ws82-7	OK	8.13929	7.51062	-0.115969	0.234444	0.81464	0.952455	no
Glyma01g06281	Glyma01g06281	Glyma01g06281	Gm01:6358175-6364839	ws82-0	ws82-7	OK	0.393744	1.01409	1.36486	-1.94995	0.0511824	0.313874	no
Glyma01g06290	Glyma01g06290	Glyma01g06290	Gm01:6415709-6426123	ws82-0	ws82-7	OK	12.9769	7.63533	-0.765182	1.36334	0.172775	0.561062	no
Glyma01g06300	Glyma01g06300	Glyma01g06300	Gm01:6427320-6430789	ws82-0	ws82-7	OK	21.8208	6.43185	-1.7624	3.63502	0.000277958	0.0103111	yes
Glyma01g06320	Glyma01g06320	Glyma01g06320	Gm01:6438347-6443201	ws82-0	ws82-7	OK	5.61814	3.81426	-0.558691	1.015	0.310106	0.702707	no
Glyma01g06330	Glyma01g06330	Glyma01g06330	Gm01:6463489-6464681	ws82-0	ws82-7	NOTEST	0	0	0	0	1	1	no
Glyma01g06350	Glyma01g06350	Glyma01g06350	Gm01:6519357-6525574	ws82-0	ws82-7	NOTEST	0.0899462	0	-1.79769e+308	-1.79769e+308	0.135176	1	no
Glyma01g06370	Glyma01g06370	Glyma01g06370	Gm01:6606759-6612290	ws82-0	ws82-7	NOTEST	0.290176	0.184177	-0.655838	0.868214	0.385277	1	no
Glyma01g06380	Glyma01g06380	Glyma01g06380	Gm01:6619142-6624870	ws82-0	ws82-7	OK	2.92125	4.93553	0.756621	-1.27722	0.201525	0.595623	no
Glyma01g06403	Glyma01g06403	Glyma01g06403	Gm01:6653831-6654651	ws82-0	ws82-7	NOTEST	0	0	0	0	1	1	no
Glyma01g06426	Glyma01g06426	Glyma01g06426	Gm01:6655568-6658132	ws82-0	ws82-7	NOTEST	0	0	0	0	1	1	no
Glyma01g06450	Glyma01g06450	Glyma01g06450	Gm01:6697229-6704493	ws82-0	ws82-7	OK	1.91878	2.70533	0.495615	-0.953839	0.340165	0.727381	no
Glyma01g06465	Glyma01g06465	Glyma01g06465	Gm01:6734268-6734951	ws82-0	ws82-7	NOTEST	0	0	0	0	1	1	no
Glyma01g06480	Glyma01g06480	Glyma01g06480	Gm01:6737090-6743586	ws82-0	ws82-7	OK	0.356429	0.895752	1.32948	-1.52051	0.128384	0.49244	no
Glyma01g06530	Glyma01g06530	Glyma01g06530	Gm01:6773745-6780125	ws82-0	ws82-7	NOTEST	0.121862	0.049274	-1.30635	0.978627	0.327764	1	no
Glyma01g06540	Glyma01g06540	Glyma01g06540	Gm01:6785070-6791180	ws82-0	ws82-7	OK	1.40861	1.65057	0.228687	-0.289177	0.772446	0.939273	no
Glyma01g06550	Glyma01g06550	Glyma01g06550	Gm01:6797682-6802949	ws82-0	ws82-7	OK	7.67302	1.37532	-2.48002	4.59817	4.26218e-06	0.000380823	yes
Glyma01g06575	Glyma01g06575	Glyma01g06575	Gm01:6821946-6822491	ws82-0	ws82-7	NOTEST	0	0	0	0	1	1	no
Glyma01g06600	Glyma01g06600	Glyma01g06600	Gm01:6945949-6947844	ws82-0	ws82-7	OK	15.0768	11.4787	-0.39337	0.734777	0.462475	0.806644	no
Glyma01g06610	Glyma01g06610	Glyma01g06610	Gm01:6949449-6956726	ws82-0	ws82-7	NOTEST	0.0816442	0.101017	0.307177	-0.194312	0.845931	1	no
Glyma01g06620	Glyma01g06620	Glyma01g06620	Gm01:6963802-6967415	ws82-0	ws82-7	OK	7.72754	3.83024	-1.01257	1.86896	0.0616284	0.344682	no
Glyma01g06630	Glyma01g06630	Glyma01g06630	Gm01:6987088-6990503	ws82-0	ws82-7	OK	5.42936	6.74254	0.312509	-0.578451	0.56296	0.857512	no
Glyma01g06640	Glyma01g06640	Glyma01g06640	Gm01:6992005-6995011	ws82-0	ws82-7	OK	0.46844	2.29024	2.28956	-3.14607	0.00165481	0.0376254	yes
Glyma01g06660	Glyma01g06660	Glyma01g06660	Gm01:7007301-7012903	ws82-0	ws82-7	NOTEST	0.0514111	0.0259548	-0.986079	0.463836	0.642765	1	no
Glyma01g06671	Glyma01g06671	Glyma01g06671	Gm01:7051709-7055503	ws82-0	ws82-7	NOTEST	0	0	0	0	1	1	no
Glyma01g06681	Glyma01g06681	Glyma01g06681	Gm01:7074917-7078717	ws82-0	ws82-7	OK	6.51654	4.54599	-0.519511	1.09716	0.272572	0.669182	no
Glyma01g06690	Glyma01g06690	Glyma01g06690	Gm01:7089055-7091542	ws82-0	ws82-7	OK	0.0916535	0.455188	2.3122	-2.6506	0.00803487	0.105355	no
Glyma01g06700	Glyma01g06700	Glyma01g06700	Gm01:7093539-7097353	ws82-0	ws82-7	OK	1.93078	3.38121	0.808355	-1.39583	0.162766	0.546674	no
Glyma01g06720	Glyma01g06720	Glyma01g06720	Gm01:7128540-7130153	ws82-0	ws82-7	NOTEST	0	0	0	0	1	1	no
Glyma01g06730	Glyma01g06730	Glyma01g06730	Gm01:7131214-7140582	ws82-0	ws82-7	OK	1.60743	1.12676	-0.512566	0.866313	0.386319	0.757621	no
Glyma01g06740	Glyma01g06740	Glyma01g06740	Gm01:7146652-7148230	ws82-0	ws82-7	OK	37.1566	52.3634	0.494939	-0.896685	0.369887	0.747051	no
Glyma01g06750	Glyma01g06750	Glyma01g06750	Gm01:7149379-7152784	ws82-0	ws82-7	OK	4.90502	4.28327	-0.195546	0.345374	0.729813	0.924228	no
Glyma01g06762	Glyma01g06762	Glyma01g06762	Gm01:7159103-7161168	ws82-0	ws82-7	NOTEST	0	0	0	0	1	1	no
Glyma01g06774	Glyma01g06774	Glyma01g06774	Gm01:7193728-7195967	ws82-0	ws82-7	NOTEST	0	0.0471761	1.79769e+308	1.79769e+308	0.170175	1	no
Glyma01g06787	Glyma01g06787	Glyma01g06787	Gm01:7202426-7203771	ws82-0	ws82-7	NOTEST	0.126397	0.113339	-0.157311	0.0851568	0.932137	1	no
Glyma01g06800	Glyma01g06800	Glyma01g06800	Gm01:7209667-7216248	ws82-0	ws82-7	OK	7.71548	5.30488	-0.540435	1.03325	0.301486	0.694827	no
Glyma01g06810	Glyma01g06810	Glyma01g06810	Gm01:7209667-7216248	ws82-0	ws82-7	OK	0.636398	0.658736	0.0497712	-0.0237446	0.981056	0.995971	no
Glyma01g06820	Glyma01g06820	Glyma01g06820	Gm01:7217423-7219310	ws82-0	ws82-7	NOTEST	0.136031	0.256231	0.913514	-0.785744	0.432017	1	no
Glyma01g06830	Glyma01g06830	Glyma01g06830	Gm01:7247591-7249157	ws82-0	ws82-7	NOTEST	0	0.129461	1.79769e+308	1.79769e+308	0.0247313	1	no
Glyma01g06840	Glyma01g06840	Glyma01g06840	Gm01:7250230-7254936	ws82-0	ws82-7	OK	14.5626	9.08997	-0.67992	1.42001	0.155606	0.53524	no
Glyma01g06850	Glyma01g06850	Glyma01g06850	Gm01:7272747-7275098	ws82-0	ws82-7	OK	1.83384	0.554645	-1.72524	2.45799	0.0139718	0.147984	no
Glyma01g06860	Glyma01g06860	Glyma01g06860	Gm01:7277818-7281645	ws82-0	ws82-7	NOTEST	0	0	0	0	1	1	no
Glyma01g06870	Glyma01g06870	Glyma01g06870	Gm01:7343212-7351310	ws82-0	ws82-7	OK	3.01004	1.40824	-1.09589	1.59516	0.110676	0.463563	no
Glyma01g06880	Glyma01g06880	Glyma01g06880	Gm01:7358248-7360930	ws82-0	ws82-7	NOTEST	0.0620252	0.10866	0.808894	-0.806438	0.41999	1	no
Glyma01g06902	Glyma01g06902	Glyma01g06902	Gm01:7382653-7384804	ws82-0	ws82-7	NOTEST	0	0	0	0	1	1	no
Glyma01g06924	Glyma01g06924	Glyma01g06924	Gm01:7422342-7427765	ws82-0	ws82-7	NOTEST	0	0	0	0	1	1	no
Glyma01g06947	Glyma01g06947	Glyma01g06947	Gm01:7435646-7436810	ws82-0	ws82-7	NOTEST	0	0	0	0	1	1	no
Glyma01g06970	Glyma01g06970	Glyma01g06970	Gm01:7479447-7482232	ws82-0	ws82-7	OK	6.05063	3.54197	-0.772532	1.56771	0.116949	0.474235	no
Glyma01g06980	Glyma01g06980	Glyma01g06980	Gm01:7497548-7505696	ws82-0	ws82-7	NOTEST	0	0	0	0	1	1	no
Glyma01g06995	Glyma01g06995	Glyma01g06995	Gm01:7509309-7511663	ws82-0	ws82-7	NOTEST	0	0	0	0	1	1	no
Glyma01g07010	Glyma01g07010	Glyma01g07010	Gm01:7546180-7550537	ws82-0	ws82-7	OK	12.0767	4.64977	-1.37699	2.56502	0.0103171	0.123264	no
Glyma01g07020	Glyma01g07020	Glyma01g07020	Gm01:7562682-7571075	ws82-0	ws82-7	OK	1.42879	1.15004	-0.313107	0.369252	0.71194	0.917481	no
Glyma01g07040	Glyma01g07040	Glyma01g07040	Gm01:7573115-7574981	ws82-0	ws82-7	OK	0.389113	0.476247	0.291518	-0.386361	0.699229	0.91253	no
Glyma01g07046	Glyma01g07046	Glyma01g07046	Gm01:7576240-7581159	ws82-0	ws82-7	OK	0.555573	0.801226	0.528233	-0.654483	0.512801	0.834204	no
Glyma01g07053	Glyma01g07053	Glyma01g07053	Gm01:7587960-7591978	ws82-0	ws82-7	NOTEST	0	0	0	0	1	1	no
Glyma01g07060	Glyma01g07060	Glyma01g07060	Gm01:7606030-7608993	ws82-0	ws82-7	NOTEST	0	0	0	0	1	1	no
Glyma01g07070	Glyma01g07070	Glyma01g07070	Gm01:7614281-7618124	ws82-0	ws82-7	OK	6.96803	4.61304	-0.595034	1.17084	0.241663	0.638047	no
Glyma01g07080	Glyma01g07080	Glyma01g07080	Gm01:7621975-7627809	ws82-0	ws82-7	OK	2.11845	3.05192	0.526713	-0.406849	0.684119	0.905887	no
Glyma01g07091	Glyma01g07091	Glyma01g07091	Gm01:7621975-7627809	ws82-0	ws82-7	OK	2.24024	2.16671	-0.0481504	0.0822198	0.934472	0.984999	no
Glyma01g07100	Glyma01g07100	Glyma01g07100	Gm01:7645596-7648115	ws82-0	ws82-7	OK	38.0787	41.7252	0.131935	-0.276726	0.781991	0.942596	no
Glyma01g07110	Glyma01g07110	Glyma01g07110	Gm01:7657795-7664672	ws82-0	ws82-7	NOTEST	0.036826	0.0742768	1.01219	-0.632266	0.527213	1	no
Glyma01g07120	Glyma01g07120	Glyma01g07120	Gm01:7694027-7700472	ws82-0	ws82-7	OK	38.2454	45.3566	0.246025	-0.426587	0.66968	0.8997	no
Glyma01g07130	Glyma01g07130	Glyma01g07130	Gm01:7726769-7727260	ws82-0	ws82-7	OK	107.359	86.7176	-0.308041	0.64981	0.515815	0.835203	no
Glyma01g07140	Glyma01g07140	Glyma01g07140	Gm01:7745867-7748795	ws82-0	ws82-7	OK	0.60842	0.978048	0.684837	-0.893676	0.371495	0.748122	no
Glyma01g07150	Glyma01g07150	Glyma01g07150	Gm01:7755456-7755710	ws82-0	ws82-7	NOTEST	0	0	0	0	1	1	no
Glyma01g07155	Glyma01g07155	Glyma01g07155	Gm01:7761366-7761600	ws82-0	ws82-7	OK	2.80654	1.37153	-1.033	0.50036	0.616822	0.881031	no
Glyma01g07160	Glyma01g07160	Glyma01g07160	Gm01:7762334-7764158	ws82-0	ws82-7	OK	0.812222	0.65401	-0.312562	0.421683	0.673256	0.901492	no
Glyma01g07175	Glyma01g07175	Glyma01g07175	Gm01:7777226-7781079	ws82-0	ws82-7	OK	1.89144	4.45612	1.2363	-2.24409	0.0248267	0.210639	no
Glyma01g07190	Glyma01g07190	Glyma01g07190	Gm01:7781287-7786746	ws82-0	ws82-7	OK	2.05666	1.92766	-0.0934556	0.138809	0.889601	0.973667	no
Glyma01g07212	Glyma01g07212	Glyma01g07212	Gm01:7794008-7794422	ws82-0	ws82-7	NOTEST	0	0	0	0	1	1	no
Glyma01g07234	Glyma01g07234	Glyma01g07234	Gm01:7804303-7805165	ws82-0	ws82-7	NOTEST	0.271378	0.0931167	-1.54319	1.15944	0.246278	1	no
Glyma01g07256	Glyma01g07256	Glyma01g07256	Gm01:7805183-7807029	ws82-0	ws82-7	NOTEST	0.0240295	0.0305295	0.345399	-0.141299	0.887634	1	no
Glyma01g07278	Glyma01g07278	Glyma01g07278	Gm01:7894471-7899056	ws82-0	ws82-7	NOTEST	0	0	0	0	1	1	no
Glyma01g07300	Glyma01g07300	Glyma01g07300	Gm01:7959018-7960497	ws82-0	ws82-7	OK	0.978473	0.843122	-0.214792	0.289878	0.77191	0.939273	no
Glyma01g07310	Glyma01g07310	Glyma01g07310	Gm01:7961184-7963298	ws82-0	ws82-7	OK	1.78355	4.69325	1.39584	-2.02394	0.0429765	0.284728	no
Glyma01g07320	Glyma01g07320	Glyma01g07320	Gm01:7976530-7977692	ws82-0	ws82-7	NOTEST	0	0	0	0	1	1	no
Glyma01g07343	Glyma01g07343	Glyma01g07343	Gm01:8062113-8062653	ws82-0	ws82-7	NOTEST	0	0	0	0	1	1	no
Glyma01g07366	Glyma01g07366	Glyma01g07366	Gm01:8067733-8073984	ws82-0	ws82-7	NOTEST	0	0	0	0	1	1	no
Glyma01g07390	Glyma01g07390	Glyma01g07390	Gm01:8081945-8087022	ws82-0	ws82-7	OK	6.38174	0.451283	-3.82185	6.11221	9.82597e-10	3.47442e-07	yes
Glyma01g07416	Glyma01g07416	Glyma01g07416	Gm01:8182612-8184549	ws82-0	ws82-7	NOTEST	0	0	0	0	1	1	no
Glyma01g07443	Glyma01g07443	Glyma01g07443	Gm01:8199812-8203907	ws82-0	ws82-7	NOTEST	0	0	0	0	1	1	no
Glyma01g07470	Glyma01g07470	Glyma01g07470	Gm01:8280629-8281870	ws82-0	ws82-7	NOTEST	0	0	0	0	1	1	no
Glyma01g07500	Glyma01g07500	Glyma01g07500	Gm01:8288472-8290635	ws82-0	ws82-7	NOTEST	0	0	0	0	1	1	no
Glyma01g07530	Glyma01g07530	Glyma01g07530	Gm01:8321044-8331324	ws82-0	ws82-7	OK	3.80408	2.74438	-0.471066	0.935236	0.349667	0.734304	no
Glyma01g07542	Glyma01g07542	Glyma01g07542	Gm01:8338977-8341376	ws82-0	ws82-7	OK	0.509162	0.163797	-1.63622	1.74751	0.0805482	0.395931	no
Glyma01g07554	Glyma01g07554	Glyma01g07554	Gm01:8344184-8347552	ws82-0	ws82-7	OK	30.5841	19.4045	-0.656387	1.38094	0.167298	0.552626	no
Glyma01g07567	Glyma01g07567	Glyma01g07567	Gm01:8348953-8350397	ws82-0	ws82-7	OK	0.488082	2.71564	2.4761	-3.43538	0.000591734	0.0183129	yes
Glyma01g07580	Glyma01g07580	Glyma01g07580	Gm01:8387061-8389448	ws82-0	ws82-7	OK	21.3802	12.5105	-0.773139	1.62787	0.103553	0.446999	no
Glyma01g07601	Glyma01g07601	Glyma01g07601	Gm01:8400738-8401869	ws82-0	ws82-7	OK	0.457081	0.333387	-0.455253	0.46849	0.639435	0.888324	no
Glyma01g07621	Glyma01g07621	Glyma01g07621	Gm01:8410014-8411417	ws82-0	ws82-7	NOTEST	0	0	0	0	1	1	no
Glyma01g07641	Glyma01g07641	Glyma01g07641	Gm01:8426105-8455213	ws82-0	ws82-7	OK	5.26905	3.45273	-0.609807	1.25449	0.209665	0.605606	no
Glyma01g07661	Glyma01g07661	Glyma01g07661	Gm01:8426105-8455213	ws82-0	ws82-7	NOTEST	0.255071	0.152066	-0.746201	0.252275	0.800829	1	no
Glyma01g07680	Glyma01g07680	Glyma01g07680	Gm01:8471437-8478753	ws82-0	ws82-7	OK	3.37346	4.7729	0.500636	-1.0563	0.29083	0.68618	no
Glyma01g07690	Glyma01g07690	Glyma01g07690	Gm01:8483094-8485802	ws82-0	ws82-7	OK	2.08996	1.29866	-0.686451	1.25592	0.209144	0.604795	no
Glyma01g07716	Glyma01g07716	Glyma01g07716	Gm01:8488370-8491061	ws82-0	ws82-7	NOTEST	0	0	0	0	1	1	no
Glyma01g07743	Glyma01g07743	Glyma01g07743	Gm01:8512443-8513748	ws82-0	ws82-7	NOTEST	0	0.0842206	1.79769e+308	1.79769e+308	0.100645	1	no
Glyma01g07770	Glyma01g07770	Glyma01g07770	Gm01:8571080-8576705	ws82-0	ws82-7	OK	28.0781	22.6036	-0.312893	0.662233	0.507822	0.831571	no
Glyma01g07780	Glyma01g07780	Glyma01g07780	Gm01:8580150-8584320	ws82-0	ws82-7	OK	0.246978	4.24509	4.10334	-6.04613	1.48368e-09	4.78781e-07	yes
Glyma01g07791	Glyma01g07791	Glyma01g07791	Gm01:8585310-8588909	ws82-0	ws82-7	OK	0.66071	0.876788	0.40821	-0.591649	0.554086	0.854257	no
Glyma01g07800	Glyma01g07800	Glyma01g07800	Gm01:8594093-8595436	ws82-0	ws82-7	OK	11.5106	8.60441	-0.419817	0.864828	0.387133	0.757993	no
Glyma01g07860	Glyma01g07860	Glyma01g07860	Gm01:8667868-8673493	ws82-0	ws82-7	NOTEST	0.124185	0.212091	0.77219	-0.890888	0.372989	1	no
Glyma01g07876	Glyma01g07876	Glyma01g07876	Gm01:8788410-8789743	ws82-0	ws82-7	NOTEST	0.0256237	0	-1.79769e+308	-1.79769e+308	0.262262	1	no
Glyma01g07893	Glyma01g07893	Glyma01g07893	Gm01:8792135-8793707	ws82-0	ws82-7	NOTEST	0	0	0	0	1	1	no
Glyma01g07910	Glyma01g07910	Glyma01g07910	Gm01:8838722-8843110	ws82-0	ws82-7	NOTEST	0	0	0	0	1	1	no
Glyma01g07930	Glyma01g07930	Glyma01g07930	Gm01:8874759-8878203	ws82-0	ws82-7	OK	14.8501	4.76669	-1.63942	3.31317	0.000922464	0.0251318	yes
Glyma01g07940	Glyma01g07940	Glyma01g07940	Gm01:8910470-8913789	ws82-0	ws82-7	OK	1.21882	1.87613	0.622281	-1.01069	0.312164	0.704776	no
Glyma01g07970	Glyma01g07970	Glyma01g07970	Gm01:8936938-8942561	ws82-0	ws82-7	NOTEST	0	0	0	0	1	1	no
Glyma01g07985	Glyma01g07985	Glyma01g07985	Gm01:8949064-8950284	ws82-0	ws82-7	NOTEST	0	0	0	0	1	1	no
Glyma01g08001	Glyma01g08001	Glyma01g08001	Gm01:8978273-8979785	ws82-0	ws82-7	NOTEST	0	0	0	0	1	1	no
Glyma01g08015	Glyma01g08015	Glyma01g08015	Gm01:8998365-8999926	ws82-0	ws82-7	NOTEST	0	0	0	0	1	1	no
Glyma01g08030	Glyma01g08030	Glyma01g08030	Gm01:9017676-9019966	ws82-0	ws82-7	NOTEST	0	0	0	0	1	1	no
Glyma01g08043	Glyma01g08043	Glyma01g08043	Gm01:9021976-9042121	ws82-0	ws82-7	OK	1.02535	1.38025	0.428818	-0.809058	0.418482	0.777609	no
Glyma01g08056	Glyma01g08056	Glyma01g08056	Gm01:9051046-9057050	ws82-0	ws82-7	OK	4.3743	2.86885	-0.60858	1.12776	0.259423	0.655968	no
Glyma01g08070	Glyma01g08070	Glyma01g08070	Gm01:9109611-9110650	ws82-0	ws82-7	NOTEST	0	0	0	0	1	1	no
Glyma01g08080	Glyma01g08080	Glyma01g08080	Gm01:9174134-9176210	ws82-0	ws82-7	OK	2.8019	2.34073	-0.259447	0.475963	0.634101	0.886563	no
Glyma01g08096	Glyma01g08096	Glyma01g08096	Gm01:9198539-9199466	ws82-0	ws82-7	NOTEST	0	0	0	0	1	1	no
Glyma01g08113	Glyma01g08113	Glyma01g08113	Gm01:9252869-9254570	ws82-0	ws82-7	NOTEST	0	0	0	0	1	1	no
Glyma01g08130	Glyma01g08130	Glyma01g08130	Gm01:9331637-9344994	ws82-0	ws82-7	NOTEST	0	0	0	0	1	1	no
Glyma01g08150	Glyma01g08150	Glyma01g08150	Gm01:9446809-9451393	ws82-0	ws82-7	NOTEST	0.112295	0.0245839	-2.19151	1.24066	0.214731	1	no
Glyma01g08191	Glyma01g08191	Glyma01g08191	Gm01:9525972-9529696	ws82-0	ws82-7	NOTEST	0	0	0	0	1	1	no
Glyma01g08230	Glyma01g08230	Glyma01g08230	Gm01:9575252-9581967	ws82-0	ws82-7	OK	5.37038	4.81031	-0.158892	0.324678	0.745425	0.929581	no
Glyma01g08250	Glyma01g08250	Glyma01g08250	Gm01:9636460-9637409	ws82-0	ws82-7	NOTEST	0	0	0	0	1	1	no
Glyma01g08260	Glyma01g08260	Glyma01g08260	Gm01:9642089-9646537	ws82-0	ws82-7	OK	0.779915	0.680714	-0.196268	0.237758	0.812069	0.95215	no
Glyma01g08400	Glyma01g08400	Glyma01g08400	Gm01:9844796-9845510	ws82-0	ws82-7	NOTEST	0	0	0	0	1	1	no
Glyma01g08540	Glyma01g08540	Glyma01g08540	Gm01:9914169-9919593	ws82-0	ws82-7	OK	5.25932	3.85927	-0.446546	0.853931	0.393143	0.761808	no
Glyma01g08560	Glyma01g08560	Glyma01g08560	Gm01:9947412-9949603	ws82-0	ws82-7	NOTEST	0	0	0	0	1	1	no
Glyma01g08580	Glyma01g08580	Glyma01g08580	Gm01:9980287-9986041	ws82-0	ws82-7	OK	10.2897	8.17387	-0.332116	0.694034	0.487661	0.819872	no
Glyma01g08586	Glyma01g08586	Glyma01g08586	Gm01:10000985-10002625	ws82-0	ws82-7	NOTEST	0	0	0	0	1	1	no
Glyma01g08593	Glyma01g08593	Glyma01g08593	Gm01:10003770-10020103	ws82-0	ws82-7	NOTEST	0	0	0	0	1	1	no
Glyma01g08600	Glyma01g08600	Glyma01g08600	Gm01:10022026-10027778	ws82-0	ws82-7	OK	12.997	6.95185	-0.902712	1.73452	0.0828266	0.401543	no
Glyma01g08610	Glyma01g08610	Glyma01g08610	Gm01:10032095-10036624	ws82-0	ws82-7	NOTEST	0.0470671	0.0318671	-0.56265	0.272532	0.785213	1	no
Glyma01g08621	Glyma01g08621	Glyma01g08621	Gm01:10051789-10059800	ws82-0	ws82-7	NOTEST	0	0.120459	1.79769e+308	1.79769e+308	0.0786496	1	no
Glyma01g08631	Glyma01g08631	Glyma01g08631	Gm01:10051789-10059800	ws82-0	ws82-7	NOTEST	0.0574044	0.037832	-0.601556	0.371746	0.710082	1	no
Glyma01g08640	Glyma01g08640	Glyma01g08640	Gm01:10086673-10091927	ws82-0	ws82-7	NOTEST	0.0341162	0.126547	1.89115	-1.58576	0.112794	1	no
Glyma01g08650	Glyma01g08650	Glyma01g08650	Gm01:10086673-10091927	ws82-0	ws82-7	NOTEST	0.198204	0	-1.79769e+308	-1.79769e+308	0.115705	1	no
Glyma01g08690	Glyma01g08690	Glyma01g08690	Gm01:10142572-10144504	ws82-0	ws82-7	NOTEST	0	0.0239485	1.79769e+308	1.79769e+308	0.183103	1	no
Glyma01g08730	Glyma01g08730	Glyma01g08730	Gm01:10288660-10290556	ws82-0	ws82-7	NOTEST	0	0	0	0	1	1	no
Glyma01g08745	Glyma01g08745	Glyma01g08745	Gm01:10293654-10294541	ws82-0	ws82-7	NOTEST	0	0	0	0	1	1	no
Glyma01g08760	Glyma01g08760	Glyma01g08760	Gm01:10355582-10357514	ws82-0	ws82-7	NOTEST	0	0	0	0	1	1	no
Glyma01g08870	Glyma01g08870	Glyma01g08870	Gm01:10370136-10371995	ws82-0	ws82-7	NOTEST	0	0	0	0	1	1	no
Glyma01g08980	Glyma01g08980	Glyma01g08980	Gm01:10504878-10510246	ws82-0	ws82-7	NOTEST	0	0	0	0	1	1	no
Glyma01g09000	Glyma01g09000	Glyma01g09000	Gm01:10570987-10572412	ws82-0	ws82-7	NOTEST	0	0	0	0	1	1	no
Glyma01g09010	Glyma01g09010	Glyma01g09010	Gm01:10577946-10583595	ws82-0	ws82-7	OK	10.0747	5.8722	-0.778757	1.39572	0.162797	0.546674	no
Glyma01g09040	Glyma01g09040	Glyma01g09040	Gm01:10601638-10602621	ws82-0	ws82-7	NOTEST	0	0	0	0	1	1	no
Glyma01g09066	Glyma01g09066	Glyma01g09066	Gm01:10604268-10604624	ws82-0	ws82-7	NOTEST	0	0	0	0	1	1	no
Glyma01g09093	Glyma01g09093	Glyma01g09093	Gm01:10716118-10717174	ws82-0	ws82-7	NOTEST	0	0	0	0	1	1	no
Glyma01g09120	Glyma01g09120	Glyma01g09120	Gm01:10765526-10768563	ws82-0	ws82-7	OK	13.3878	8.40798	-0.67109	1.4166	0.1566	0.537099	no
Glyma01g09160	Glyma01g09160	Glyma01g09160	Gm01:10877246-10880169	ws82-0	ws82-7	OK	3.55125	2.80569	-0.33997	0.64213	0.520788	0.837207	no
Glyma01g09190	Glyma01g09190	Glyma01g09190	Gm01:10916139-10919654	ws82-0	ws82-7	NOTEST	0	0	0	0	1	1	no
Glyma01g09205	Glyma01g09205	Glyma01g09205	Gm01:10925539-10932891	ws82-0	ws82-7	OK	0.56656	0.677096	0.257131	-0.29345	0.769178	0.938131	no
Glyma01g09220	Glyma01g09220	Glyma01g09220	Gm01:10985768-10988999	ws82-0	ws82-7	OK	3.91479	2.52658	-0.631751	1.16299	0.244834	0.641354	no
Glyma01g09251	Glyma01g09251	Glyma01g09251	Gm01:11062433-11064112	ws82-0	ws82-7	NOTEST	0	0	0	0	1	1	no
Glyma01g09280	Glyma01g09280	Glyma01g09280	Gm01:11172148-11173850	ws82-0	ws82-7	NOTEST	0	0	0	0	1	1	no
Glyma01g09290	Glyma01g09290	Glyma01g09290	Gm01:11208547-11216038	ws82-0	ws82-7	OK	2.58615	2.96695	0.198174	-0.355661	0.722094	0.921504	no
Glyma01g09310	Glyma01g09310	Glyma01g09310	Gm01:11247803-11256961	ws82-0	ws82-7	OK	21.4747	55.4184	1.36772	-2.74418	0.00606624	0.0879327	no
Glyma01g09340	Glyma01g09340	Glyma01g09340	Gm01:11290152-11290409	ws82-0	ws82-7	NOTEST	0	0	0	0	1	1	no
Glyma01g09350	Glyma01g09350	Glyma01g09350	Gm01:11294639-11296592	ws82-0	ws82-7	NOTEST	0.0384391	0	-1.79769e+308	-1.79769e+308	0.135176	1	no
Glyma01g09360	Glyma01g09360	Glyma01g09360	Gm01:11308064-11312690	ws82-0	ws82-7	OK	3.03094	0.664993	-2.18835	3.23802	0.00120362	0.0302616	yes
Glyma01g09381	Glyma01g09381	Glyma01g09381	Gm01:11366555-11369128	ws82-0	ws82-7	NOTEST	0	0	0	0	1	1	no
Glyma01g09400	Glyma01g09400	Glyma01g09400	Gm01:11464172-11469476	ws82-0	ws82-7	OK	4.4995	6.09387	0.437593	-0.815566	0.414748	0.775315	no
Glyma01g09410	Glyma01g09410	Glyma01g09410	Gm01:11464172-11469476	ws82-0	ws82-7	NOTEST	0	0	0	0	1	1	no
Glyma01g09420	Glyma01g09420	Glyma01g09420	Gm01:11496634-11503018	ws82-0	ws82-7	OK	2.20741	2.3671	0.100771	-0.188517	0.850471	0.963203	no
Glyma01g09460	Glyma01g09460	Glyma01g09460	Gm01:11555183-11556227	ws82-0	ws82-7	OK	1.90495	1.22518	-0.636764	0.849665	0.395511	0.763415	no
Glyma01g09481	Glyma01g09481	Glyma01g09481	Gm01:11560220-11561128	ws82-0	ws82-7	NOTEST	0	0	0	0	1	1	no
Glyma01g09500	Glyma01g09500	Glyma01g09500	Gm01:11608787-11608970	ws82-0	ws82-7	NOTEST	0	0	0	0	1	1	no
Glyma01g09510	Glyma01g09510	Glyma01g09510	Gm01:11675230-11676337	ws82-0	ws82-7	NOTEST	0.11008	0.0392241	-1.48874	0.806707	0.419835	1	no
Glyma01g09515	Glyma01g09515	Glyma01g09515	Gm01:11687514-11688465	ws82-0	ws82-7	NOTEST	0	0	0	0	1	1	no
Glyma01g09520	Glyma01g09520	Glyma01g09520	Gm01:11695475-11701510	ws82-0	ws82-7	OK	13.561	27.4649	1.01813	-2.12994	0.0331764	0.248698	no
Glyma01g09530	Glyma01g09530	Glyma01g09530	Gm01:11703243-11703468	ws82-0	ws82-7	OK	8.35021	19.0182	1.1875	-1.04488	0.296079	0.690254	no
Glyma01g09540	Glyma01g09540	Glyma01g09540	Gm01:11708034-11708550	ws82-0	ws82-7	NOTEST	0	0	0	0	1	1	no
Glyma01g09581	Glyma01g09581	Glyma01g09581	Gm01:11738401-11738872	ws82-0	ws82-7	NOTEST	0	0	0	0	1	1	no
Glyma01g09620	Glyma01g09620	Glyma01g09620	Gm01:11916861-11920298	ws82-0	ws82-7	NOTEST	0	0	0	0	1	1	no
Glyma01g09631	Glyma01g09631	Glyma01g09631	Gm01:11934522-11935027	ws82-0	ws82-7	NOTEST	0	0	0	0	1	1	no
Glyma01g09640	Glyma01g09640	Glyma01g09640	Gm01:11967121-11968573	ws82-0	ws82-7	OK	4.5721	3.60031	-0.344737	0.643574	0.519852	0.836585	no
Glyma01g09650	Glyma01g09650	Glyma01g09650	Gm01:11971139-11974007	ws82-0	ws82-7	OK	1.55167	2.19493	0.500356	-0.769556	0.441563	0.793444	no
Glyma01g09660	Glyma01g09660	Glyma01g09660	Gm01:11996466-12008222	ws82-0	ws82-7	OK	1.9599	1.88526	-0.0560143	0.102172	0.91862	0.981341	no
Glyma01g09860	Glyma01g09860	Glyma01g09860	Gm01:12384414-12385443	ws82-0	ws82-7	NOTEST	0	0	0	0	1	1	no
Glyma01g09900	Glyma01g09900	Glyma01g09900	Gm01:12528614-12537191	ws82-0	ws82-7	OK	0.93839	0.290445	-1.69192	2.12944	0.0332175	0.248812	no
Glyma01g09920	Glyma01g09920	Glyma01g09920	Gm01:12588417-12590126	ws82-0	ws82-7	OK	4.31061	3.63273	-0.246838	0.454308	0.649607	0.892106	no
Glyma01g09948	Glyma01g09948	Glyma01g09948	Gm01:12598148-12598766	ws82-0	ws82-7	NOTEST	0	0	0	0	1	1	no
Glyma01g09976	Glyma01g09976	Glyma01g09976	Gm01:12599050-12599537	ws82-0	ws82-7	NOTEST	0	0	0	0	1	1	no
Glyma01g10004	Glyma01g10004	Glyma01g10004	Gm01:12745024-12746402	ws82-0	ws82-7	NOTEST	0	0	0	0	1	1	no
Glyma01g10032	Glyma01g10032	Glyma01g10032	Gm01:12760733-12762383	ws82-0	ws82-7	NOTEST	0	0	0	0	1	1	no
Glyma01g10060	Glyma01g10060	Glyma01g10060	Gm01:12803637-12806519	ws82-0	ws82-7	NOTEST	0	0	0	0	1	1	no
Glyma01g10070	Glyma01g10070	Glyma01g10070	Gm01:12864161-12867113	ws82-0	ws82-7	LOWDATA	0	0	-0.00556137	0	1	1	no
Glyma01g10081	Glyma01g10081	Glyma01g10081	Gm01:12864161-12867113	ws82-0	ws82-7	OK	129.016	128.52	-0.00556137	0.0105053	0.991618	0.998113	no
Glyma01g10090	Glyma01g10090	Glyma01g10090	Gm01:12870303-12870537	ws82-0	ws82-7	OK	0	1.28204	1.79769e+308	1.79769e+308	0.183103	0.572694	no
Glyma01g10100	Glyma01g10100	Glyma01g10100	Gm01:12915879-12921146	ws82-0	ws82-7	OK	0.926883	1.21799	0.394049	-0.664729	0.506224	0.830878	no
Glyma01g10121	Glyma01g10121	Glyma01g10121	Gm01:13008740-13009964	ws82-0	ws82-7	OK	0.536694	0.114534	-2.22832	1.71436	0.0864618	0.411119	no
Glyma01g10141	Glyma01g10141	Glyma01g10141	Gm01:13045087-13045509	ws82-0	ws82-7	NOTEST	0	0	0	0	1	1	no
Glyma01g10160	Glyma01g10160	Glyma01g10160	Gm01:13068289-13070591	ws82-0	ws82-7	OK	1.95441	1.48947	-0.39193	0.475492	0.634436	0.886563	no
Glyma01g10183	Glyma01g10183	Glyma01g10183	Gm01:13094881-13100738	ws82-0	ws82-7	NOTEST	0	0	0	0	1	1	no
Glyma01g10206	Glyma01g10206	Glyma01g10206	Gm01:13259515-13263715	ws82-0	ws82-7	NOTEST	0	0	0	0	1	1	no
Glyma01g10231	Glyma01g10231	Glyma01g10231	Gm01:13305441-13308517	ws82-0	ws82-7	NOTEST	0	0	0	0	1	1	no
Glyma01g10254	Glyma01g10254	Glyma01g10254	Gm01:13309389-13321481	ws82-0	ws82-7	NOTEST	0	0.00717285	1.79769e+308	1.79769e+308	0.183103	1	no
Glyma01g10278	Glyma01g10278	Glyma01g10278	Gm01:13324783-13327645	ws82-0	ws82-7	NOTEST	0	0	0	0	1	1	no
Glyma01g10302	Glyma01g10302	Glyma01g10302	Gm01:13355409-13356481	ws82-0	ws82-7	NOTEST	0	0	0	0	1	1	no
Glyma01g10326	Glyma01g10326	Glyma01g10326	Gm01:13416710-13417813	ws82-0	ws82-7	NOTEST	0	0	0	0	1	1	no
Glyma01g10350	Glyma01g10350	Glyma01g10350	Gm01:13419562-13420937	ws82-0	ws82-7	NOTEST	0	0	0	0	1	1	no
Glyma01g10371	Glyma01g10371	Glyma01g10371	Gm01:13433576-13434202	ws82-0	ws82-7	OK	3.05547	1.59029	-0.942103	1.35858	0.17428	0.562999	no
Glyma01g10390	Glyma01g10390	Glyma01g10390	Gm01:13444506-13445181	ws82-0	ws82-7	OK	0.345547	0.604225	0.806205	-0.693444	0.488031	0.819996	no
Glyma01g10600	Glyma01g10600	Glyma01g10600	Gm01:13782194-13783121	ws82-0	ws82-7	NOTEST	0	0.0390561	1.79769e+308	1.79769e+308	0.183103	1	no
Glyma01g10610	Glyma01g10610	Glyma01g10610	Gm01:13795843-13799755	ws82-0	ws82-7	OK	3.58029	2.77236	-0.368964	0.717852	0.472849	0.813191	no
Glyma01g10730	Glyma01g10730	Glyma01g10730	Gm01:13960625-13962588	ws82-0	ws82-7	OK	0.248608	0.419217	0.753824	-0.843803	0.398779	0.765986	no
Glyma01g10850	Glyma01g10850	Glyma01g10850	Gm01:14070871-14087892	ws82-0	ws82-7	OK	4.44549	3.59864	-0.304892	0.578241	0.563101	0.857512	no
Glyma01g10880	Glyma01g10880	Glyma01g10880	Gm01:14112119-14118766	ws82-0	ws82-7	OK	2.07603	2.09764	0.0149407	-0.0252246	0.979876	0.995971	no
Glyma01g10900	Glyma01g10900	Glyma01g10900	Gm01:14129302-14130710	ws82-0	ws82-7	NOTEST	0	0	0	0	1	1	no
Glyma01g11110	Glyma01g11110	Glyma01g11110	Gm01:14247142-14248189	ws82-0	ws82-7	NOTEST	0.052654	0	-1.79769e+308	-1.79769e+308	0.135176	1	no
Glyma01g11130	Glyma01g11130	Glyma01g11130	Gm01:14320794-14324110	ws82-0	ws82-7	NOTEST	0.203728	0	-1.79769e+308	-1.79769e+308	0.0203511	1	no
Glyma01g11180	Glyma01g11180	Glyma01g11180	Gm01:14568533-14568824	ws82-0	ws82-7	OK	28719.3	43878.6	0.611494	-0.883741	0.376836	0.750895	no
Glyma01g11390	Glyma01g11390	Glyma01g11390	Gm01:14807028-14809655	ws82-0	ws82-7	OK	22.2212	15.7708	-0.494682	0.984857	0.324694	0.715141	no
Glyma01g11473	Glyma01g11473	Glyma01g11473	Gm01:14947313-14947773	ws82-0	ws82-7	NOTEST	0	0	0	0	1	1	no
Glyma01g11556	Glyma01g11556	Glyma01g11556	Gm01:14947841-14948129	ws82-0	ws82-7	NOTEST	0	0	0	0	1	1	no
Glyma01g11640	Glyma01g11640	Glyma01g11640	Gm01:14972818-14973806	ws82-0	ws82-7	OK	88.2748	66.5001	-0.408644	0.853506	0.393379	0.761997	no
Glyma01g11755	Glyma01g11755	Glyma01g11755	Gm01:15083417-15085790	ws82-0	ws82-7	NOTEST	0	0	0	0	1	1	no
Glyma01g11870	Glyma01g11870	Glyma01g11870	Gm01:15195053-15195880	ws82-0	ws82-7	OK	824.111	116.505	-2.82245	5.33577	9.5141e-08	1.74712e-05	yes
Glyma01g12310	Glyma01g12310	Glyma01g12310	Gm01:15500343-15500912	ws82-0	ws82-7	NOTEST	0	0	0	0	1	1	no
Glyma01g12340	Glyma01g12340	Glyma01g12340	Gm01:15542210-15548262	ws82-0	ws82-7	OK	11.8143	9.73959	-0.278596	0.560186	0.575353	0.863364	no
Glyma01g12740	Glyma01g12740	Glyma01g12740	Gm01:15937028-15939729	ws82-0	ws82-7	OK	20.1494	6.61242	-1.60748	3.36125	0.000775902	0.0222899	yes
Glyma01g12840	Glyma01g12840	Glyma01g12840	Gm01:15948220-15953470	ws82-0	ws82-7	OK	0.420126	0.254966	-0.72052	0.672779	0.501088	0.827494	no
Glyma01g12940	Glyma01g12940	Glyma01g12940	Gm01:16087453-16089518	ws82-0	ws82-7	OK	0.988816	1.4698	0.571844	-0.858086	0.390845	0.760396	no
Glyma01g12955	Glyma01g12955	Glyma01g12955	Gm01:16103170-16106499	ws82-0	ws82-7	NOTEST	0	0	0	0	1	1	no
Glyma01g12970	Glyma01g12970	Glyma01g12970	Gm01:16134796-16136261	ws82-0	ws82-7	OK	14.2088	6.69312	-1.08604	2.24821	0.0245629	0.210073	no
Glyma01g13170	Glyma01g13170	Glyma01g13170	Gm01:16335425-16339127	ws82-0	ws82-7	OK	42.9195	49.9099	0.217695	-0.436929	0.662163	0.896569	no
Glyma01g13390	Glyma01g13390	Glyma01g13390	Gm01:16722784-16724403	ws82-0	ws82-7	NOTEST	0	0	0	0	1	1	no
Glyma01g13400	Glyma01g13400	Glyma01g13400	Gm01:16727753-16728455	ws82-0	ws82-7	NOTEST	0	0	0	0	1	1	no
Glyma01g13410	Glyma01g13410	Glyma01g13410	Gm01:16732842-16733939	ws82-0	ws82-7	NOTEST	0.09097	0.0324445	-1.48742	0.80599	0.420249	1	no
Glyma01g13532	Glyma01g13532	Glyma01g13532	Gm01:16745457-16750194	ws82-0	ws82-7	OK	0.271322	0.757684	1.48159	-1.27071	0.203832	0.598125	no
Glyma01g13654	Glyma01g13654	Glyma01g13654	Gm01:16827427-16868761	ws82-0	ws82-7	OK	3.39287	4.24918	0.324679	-0.611948	0.540572	0.846767	no
Glyma01g13777	Glyma01g13777	Glyma01g13777	Gm01:16940733-16941754	ws82-0	ws82-7	NOTEST	0	0	0	0	1	1	no
Glyma01g13900	Glyma01g13900	Glyma01g13900	Gm01:17306260-17308391	ws82-0	ws82-7	NOTEST	0	0	0	0	1	1	no
Glyma01g13930	Glyma01g13930	Glyma01g13930	Gm01:17320003-17321677	ws82-0	ws82-7	OK	0.155402	0.480202	1.62763	-1.81793	0.0690748	0.365944	no
Glyma01g13945	Glyma01g13945	Glyma01g13945	Gm01:17420498-17470577	ws82-0	ws82-7	OK	0.416653	0.172849	-1.26933	1.4307	0.152515	0.529651	no
Glyma01g13960	Glyma01g13960	Glyma01g13960	Gm01:17481711-17482061	ws82-0	ws82-7	NOTEST	0	0	0	0	1	1	no
Glyma01g14160	Glyma01g14160	Glyma01g14160	Gm01:17627819-17629241	ws82-0	ws82-7	NOTEST	0	0	0	0	1	1	no
Glyma01g14266	Glyma01g14266	Glyma01g14266	Gm01:17633685-17639586	ws82-0	ws82-7	NOTEST	0	0	0	0	1	1	no
Glyma01g14373	Glyma01g14373	Glyma01g14373	Gm01:18006948-18034570	ws82-0	ws82-7	OK	4.27544	3.89913	-0.132919	0.273223	0.784682	0.943452	no
Glyma01g14480	Glyma01g14480	Glyma01g14480	Gm01:18042133-18046082	ws82-0	ws82-7	OK	27.1817	25.2155	-0.108324	0.228385	0.819347	0.953818	no
Glyma01g14500	Glyma01g14500	Glyma01g14500	Gm01:18130228-18132625	ws82-0	ws82-7	NOTEST	0	0	0	0	1	1	no
Glyma01g14700	Glyma01g14700	Glyma01g14700	Gm01:18300892-18301399	ws82-0	ws82-7	OK	2.36851	1.25635	-0.914746	1.16615	0.243555	0.640058	no
Glyma01g14733	Glyma01g14733	Glyma01g14733	Gm01:18318922-18323085	ws82-0	ws82-7	OK	0.457874	1.21335	1.40598	-2.07236	0.0382316	0.268599	no
Glyma01g14766	Glyma01g14766	Glyma01g14766	Gm01:18346082-18347761	ws82-0	ws82-7	OK	0.323384	0.4627	0.516829	-0.649544	0.515987	0.835284	no
Glyma01g14800	Glyma01g14800	Glyma01g14800	Gm01:18356149-18373966	ws82-0	ws82-7	OK	3.05221	3.57592	0.228457	-0.421198	0.67361	0.901685	no
Glyma01g14905	Glyma01g14905	Glyma01g14905	Gm01:18507857-18508875	ws82-0	ws82-7	NOTEST	0	0	0	0	1	1	no
Glyma01g15010	Glyma01g15010	Glyma01g15010	Gm01:18517441-18518370	ws82-0	ws82-7	NOTEST	0	0	0	0	1	1	no
Glyma01g15134	Glyma01g15134	Glyma01g15134	Gm01:18526281-18533321	ws82-0	ws82-7	OK	1.2946	1.26553	-0.0327578	0.0530069	0.957726	0.990631	no
Glyma01g15258	Glyma01g15258	Glyma01g15258	Gm01:18637238-18640215	ws82-0	ws82-7	NOTEST	0.0327316	0.284007	3.11717	-2.16129	0.0306726	1	no
Glyma01g15382	Glyma01g15382	Glyma01g15382	Gm01:18694961-18695204	ws82-0	ws82-7	NOTEST	0	0	0	0	1	1	no
Glyma01g15506	Glyma01g15506	Glyma01g15506	Gm01:18952413-18962622	ws82-0	ws82-7	OK	28.1766	27.6155	-0.0290181	0.0509437	0.95937	0.990982	no
Glyma01g15630	Glyma01g15630	Glyma01g15630	Gm01:19254139-19255483	ws82-0	ws82-7	OK	0.288151	0.461251	0.678726	-0.751265	0.452493	0.800765	no
Glyma01g15687	Glyma01g15687	Glyma01g15687	Gm01:19474756-19475786	ws82-0	ws82-7	NOTEST	0	0	0	0	1	1	no
Glyma01g15744	Glyma01g15744	Glyma01g15744	Gm01:19561924-19565934	ws82-0	ws82-7	NOTEST	0	0	0	0	1	1	no
Glyma01g15802	Glyma01g15802	Glyma01g15802	Gm01:19569955-19570642	ws82-0	ws82-7	NOTEST	0	0	0	0	1	1	no
Glyma01g15860	Glyma01g15860	Glyma01g15860	Gm01:19642510-19643505	ws82-0	ws82-7	NOTEST	0	0	0	0	1	1	no
Glyma01g15883	Glyma01g15883	Glyma01g15883	Gm01:19661251-19662687	ws82-0	ws82-7	NOTEST	0	0	0	0	1	1	no
Glyma01g15906	Glyma01g15906	Glyma01g15906	Gm01:19730841-19731653	ws82-0	ws82-7	NOTEST	0	0	0	0	1	1	no
Glyma01g15930	Glyma01g15930	Glyma01g15930	Gm01:19793857-19799930	ws82-0	ws82-7	OK	28.4717	38.8847	0.449675	-0.924412	0.355272	0.737297	no
Glyma01g16140	Glyma01g16140	Glyma01g16140	Gm01:20041371-20043743	ws82-0	ws82-7	OK	2.76259	2.09042	-0.402225	0.646259	0.518112	0.83573	no
Glyma01g16250	Glyma01g16250	Glyma01g16250	Gm01:20048200-20050535	ws82-0	ws82-7	NOTEST	0	0	0	0	1	1	no
Glyma01g16360	Glyma01g16360	Glyma01g16360	Gm01:20233418-20235447	ws82-0	ws82-7	OK	6.75399	0.752356	-3.16625	4.56098	5.09144e-06	0.000443009	yes
Glyma01g16370	Glyma01g16370	Glyma01g16370	Gm01:20243646-20255339	ws82-0	ws82-7	OK	5.10106	6.29751	0.303985	-0.599501	0.548839	0.85137	no
Glyma01g16375	Glyma01g16375	Glyma01g16375	Gm01:20243646-20255339	ws82-0	ws82-7	OK	2.68956	4.76247	0.824341	-0.3605	0.718473	0.920148	no
Glyma01g16380	Glyma01g16380	Glyma01g16380	Gm01:20340974-20356558	ws82-0	ws82-7	OK	18.2246	22.0051	0.27195	-0.570662	0.568229	0.859474	no
Glyma01g16526	Glyma01g16526	Glyma01g16526	Gm01:20473820-20507463	ws82-0	ws82-7	OK	4.6826	4.4547	-0.0719814	0.123728	0.901531	0.976489	no
Glyma01g16673	Glyma01g16673	Glyma01g16673	Gm01:20473820-20507463	ws82-0	ws82-7	NOTEST	0.149329	0.243799	0.707197	-0.331283	0.740431	1	no
Glyma01g16820	Glyma01g16820	Glyma01g16820	Gm01:20713503-20720624	ws82-0	ws82-7	OK	3.81904	3.00464	-0.346017	0.681718	0.495417	0.823365	no
Glyma01g17030	Glyma01g17030	Glyma01g17030	Gm01:21011809-21014457	ws82-0	ws82-7	OK	0.414309	0.555529	0.423154	-0.468001	0.639784	0.888379	no
Glyma01g17230	Glyma01g17230	Glyma01g17230	Gm01:21161585-21162372	ws82-0	ws82-7	OK	9.87966	9.15827	-0.109386	0.207794	0.83539	0.958709	no
Glyma01g17240	Glyma01g17240	Glyma01g17240	Gm01:21232889-21235373	ws82-0	ws82-7	OK	0.874585	1.12319	0.360936	-0.493827	0.621428	0.882805	no
Glyma01g17271	Glyma01g17271	Glyma01g17271	Gm01:21300956-21302664	ws82-0	ws82-7	NOTEST	0	0	0	0	1	1	no
Glyma01g17300	Glyma01g17300	Glyma01g17300	Gm01:21447376-21448520	ws82-0	ws82-7	OK	53.6261	59.614	0.152714	-0.315881	0.752092	0.93112	no
Glyma01g17330	Glyma01g17330	Glyma01g17330	Gm01:21487778-21490647	ws82-0	ws82-7	NOTEST	0	0	0	0	1	1	no
Glyma01g17350	Glyma01g17350	Glyma01g17350	Gm01:21601999-21604652	ws82-0	ws82-7	OK	4.37076	3.34313	-0.386685	0.78483	0.432553	0.787232	no
Glyma01g17426	Glyma01g17426	Glyma01g17426	Gm01:21677182-21677611	ws82-0	ws82-7	NOTEST	0	0	0	0	1	1	no
Glyma01g17503	Glyma01g17503	Glyma01g17503	Gm01:21677719-21680521	ws82-0	ws82-7	NOTEST	0	0	0	0	1	1	no
Glyma01g17580	Glyma01g17580	Glyma01g17580	Gm01:21886080-21888825	ws82-0	ws82-7	NOTEST	0	0.0198922	1.79769e+308	1.79769e+308	0.277048	1	no
Glyma01g17590	Glyma01g17590	Glyma01g17590	Gm01:21937384-21937864	ws82-0	ws82-7	NOTEST	0	0	0	0	1	1	no
Glyma01g17820	Glyma01g17820	Glyma01g17820	Gm01:22078170-22079110	ws82-0	ws82-7	OK	56.6323	81.9526	0.533166	-1.12099	0.262294	0.659614	no
Glyma01g17850	Glyma01g17850	Glyma01g17850	Gm01:22130113-22137111	ws82-0	ws82-7	OK	36.3528	39.0888	0.104691	-0.195798	0.844768	0.961169	no
Glyma01g17870	Glyma01g17870	Glyma01g17870	Gm01:22202473-22210341	ws82-0	ws82-7	OK	20.2363	16.3852	-0.304558	0.56495	0.572108	0.860869	no
Glyma01g17880	Glyma01g17880	Glyma01g17880	Gm01:22222121-22222938	ws82-0	ws82-7	NOTEST	0	0	0	0	1	1	no
Glyma01g18040	Glyma01g18040	Glyma01g18040	Gm01:22484144-22487576	ws82-0	ws82-7	OK	12.6887	11.0943	-0.193728	0.407638	0.68354	0.905808	no
Glyma01g18200	Glyma01g18200	Glyma01g18200	Gm01:22687069-22688346	ws82-0	ws82-7	NOTEST	0	0	0	0	1	1	no
Glyma01g18360	Glyma01g18360	Glyma01g18360	Gm01:22689358-22689601	ws82-0	ws82-7	OK	1.08228	2.69597	1.31673	-0.858867	0.390414	0.759937	no
Glyma01g18520	Glyma01g18520	Glyma01g18520	Gm01:22790155-22793135	ws82-0	ws82-7	NOTEST	0	0	0	0	1	1	no
Glyma01g18606	Glyma01g18606	Glyma01g18606	Gm01:23174174-23175344	ws82-0	ws82-7	NOTEST	0.348298	0	-1.79769e+308	-1.79769e+308	0.00747255	1	no
Glyma01g18693	Glyma01g18693	Glyma01g18693	Gm01:23245420-23247113	ws82-0	ws82-7	NOTEST	0	0	0	0	1	1	no
Glyma01g18780	Glyma01g18780	Glyma01g18780	Gm01:23303293-23306986	ws82-0	ws82-7	OK	13.3142	18.0324	0.437627	-0.923673	0.355657	0.737312	no
Glyma01g18885	Glyma01g18885	Glyma01g18885	Gm01:23422050-23424265	ws82-0	ws82-7	NOTEST	0	0	0	0	1	1	no
Glyma01g18990	Glyma01g18990	Glyma01g18990	Gm01:23424891-23425203	ws82-0	ws82-7	NOTEST	0	0	0	0	1	1	no
Glyma01g19200	Glyma01g19200	Glyma01g19200	Gm01:23586981-23590259	ws82-0	ws82-7	OK	3.12126	3.22533	0.0473191	-0.0752731	0.939997	0.986475	no
Glyma01g19420	Glyma01g19420	Glyma01g19420	Gm01:23910735-23912214	ws82-0	ws82-7	OK	27.9204	17.8109	-0.648559	1.36903	0.170989	0.557627	no
Glyma01g19820	Glyma01g19820	Glyma01g19820	Gm01:24220923-24227067	ws82-0	ws82-7	OK	2.55333	1.22717	-1.05704	1.77675	0.0756102	0.383627	no
Glyma01g20030	Glyma01g20030	Glyma01g20030	Gm01:24388541-24405141	ws82-0	ws82-7	OK	7.0477	5.71263	-0.302996	0.474407	0.63521	0.886814	no
Glyma01g20130	Glyma01g20130	Glyma01g20130	Gm01:24561667-24562473	ws82-0	ws82-7	NOTEST	0	0	0	0	1	1	no
Glyma01g20230	Glyma01g20230	Glyma01g20230	Gm01:24590327-24594299	ws82-0	ws82-7	OK	0.687584	2.16601	1.65543	-2.23776	0.0252366	0.212251	no
Glyma01g20306	Glyma01g20306	Glyma01g20306	Gm01:24680832-24681420	ws82-0	ws82-7	NOTEST	0	0	0	0	1	1	no
Glyma01g20383	Glyma01g20383	Glyma01g20383	Gm01:24850234-24853077	ws82-0	ws82-7	OK	4.89428	7.74362	0.661913	-1.36	0.173829	0.562469	no
Glyma01g20460	Glyma01g20460	Glyma01g20460	Gm01:24945683-24950931	ws82-0	ws82-7	OK	9.77709	13.9869	0.516599	-1.08947	0.275945	0.671979	no
Glyma01g20565	Glyma01g20565	Glyma01g20565	Gm01:25139086-25141476	ws82-0	ws82-7	NOTEST	0	0	0	0	1	1	no
Glyma01g20670	Glyma01g20670	Glyma01g20670	Gm01:25147643-25157143	ws82-0	ws82-7	OK	34.9014	17.1687	-1.02351	2.15117	0.0314627	0.241347	no
Glyma01g20700	Glyma01g20700	Glyma01g20700	Gm01:25222324-25227920	ws82-0	ws82-7	OK	70.715	15.4256	-2.19669	4.4715	7.76726e-06	0.000626622	yes
Glyma01g20710	Glyma01g20710	Glyma01g20710	Gm01:25241778-25246814	ws82-0	ws82-7	OK	1.1619	0.634871	-0.871947	1.31607	0.188151	0.579323	no
Glyma01g20720	Glyma01g20720	Glyma01g20720	Gm01:25343080-25358309	ws82-0	ws82-7	OK	0.828433	1.14337	0.464839	-0.733017	0.463548	0.807177	no
Glyma01g20740	Glyma01g20740	Glyma01g20740	Gm01:25402501-25405946	ws82-0	ws82-7	OK	0.54074	0.314736	-0.78079	0.963802	0.335145	0.723566	no
Glyma01g20751	Glyma01g20751	Glyma01g20751	Gm01:25409531-25409921	ws82-0	ws82-7	NOTEST	0	0	0	0	1	1	no
Glyma01g20760	Glyma01g20760	Glyma01g20760	Gm01:25500530-25509163	ws82-0	ws82-7	OK	22.2265	21.0849	-0.0760663	0.146676	0.883388	0.972332	no
Glyma01g20775	Glyma01g20775	Glyma01g20775	Gm01:25559739-25563228	ws82-0	ws82-7	OK	15.8865	17.1515	0.110529	-0.232621	0.816056	0.952791	no
Glyma01g20790	Glyma01g20790	Glyma01g20790	Gm01:25566713-25569152	ws82-0	ws82-7	OK	0.927733	1.5434	0.734336	-0.949708	0.342261	0.72955	no
Glyma01g20800	Glyma01g20800	Glyma01g20800	Gm01:25569808-25571509	ws82-0	ws82-7	NOTEST	0.0853967	0.159155	0.89818	-0.561052	0.574762	1	no
Glyma01g20811	Glyma01g20811	Glyma01g20811	Gm01:25640214-25651295	ws82-0	ws82-7	OK	10.0962	13.2379	0.390866	-0.809773	0.418071	0.777346	no
Glyma01g20820	Glyma01g20820	Glyma01g20820	Gm01:25640214-25651295	ws82-0	ws82-7	LOWDATA	0	0	0.390866	0	1	1	no
Glyma01g20860	Glyma01g20860	Glyma01g20860	Gm01:25711548-25714121	ws82-0	ws82-7	OK	18.9976	37.7442	0.99044	-2.06596	0.0388325	0.270533	no
Glyma01g20870	Glyma01g20870	Glyma01g20870	Gm01:25714752-25716813	ws82-0	ws82-7	NOTEST	0.281309	0.328245	0.222614	-0.249658	0.802852	1	no
Glyma01g20885	Glyma01g20885	Glyma01g20885	Gm01:25783765-25787946	ws82-0	ws82-7	NOTEST	0	0	0	0	1	1	no
Glyma01g20900	Glyma01g20900	Glyma01g20900	Gm01:25807514-25813526	ws82-0	ws82-7	NOTEST	0	0	0	0	1	1	no
Glyma01g20910	Glyma01g20910	Glyma01g20910	Gm01:25867401-25867807	ws82-0	ws82-7	NOTEST	0	0	0	0	1	1	no
Glyma01g20920	Glyma01g20920	Glyma01g20920	Gm01:25867821-25870459	ws82-0	ws82-7	OK	4.97435	6.31096	0.34335	-0.581396	0.560973	0.857034	no
Glyma01g20935	Glyma01g20935	Glyma01g20935	Gm01:25874290-25875066	ws82-0	ws82-7	OK	0	0.456988	1.79769e+308	1.79769e+308	0.0247313	0.210073	no
Glyma01g20950	Glyma01g20950	Glyma01g20950	Gm01:26043470-26048530	ws82-0	ws82-7	OK	1.89223	1.52709	-0.309298	0.543288	0.586931	0.868972	no
Glyma01g20970	Glyma01g20970	Glyma01g20970	Gm01:26111521-26112660	ws82-0	ws82-7	NOTEST	0.055205	0	-1.79769e+308	-1.79769e+308	0.135176	1	no
Glyma01g20980	Glyma01g20980	Glyma01g20980	Gm01:26203747-26206343	ws82-0	ws82-7	NOTEST	0	0	0	0	1	1	no
Glyma01g20986	Glyma01g20986	Glyma01g20986	Gm01:26214735-26217244	ws82-0	ws82-7	NOTEST	0	0	0	0	1	1	no
Glyma01g20993	Glyma01g20993	Glyma01g20993	Gm01:26218166-26218983	ws82-0	ws82-7	NOTEST	0	0	0	0	1	1	no
Glyma01g21000	Glyma01g21000	Glyma01g21000	Gm01:26227617-26228265	ws82-0	ws82-7	NOTEST	0	0	0	0	1	1	no
Glyma01g21120	Glyma01g21120	Glyma01g21120	Gm01:26230555-26237293	ws82-0	ws82-7	NOTEST	0	0	0	0	1	1	no
Glyma01g21241	Glyma01g21241	Glyma01g21241	Gm01:26358875-26362351	ws82-0	ws82-7	NOTEST	0	0	0	0	1	1	no
Glyma01g21360	Glyma01g21360	Glyma01g21360	Gm01:26380864-26392487	ws82-0	ws82-7	OK	3.71291	2.78822	-0.413207	0.731838	0.464267	0.807651	no
Glyma01g21480	Glyma01g21480	Glyma01g21480	Gm01:26542098-26544485	ws82-0	ws82-7	OK	3.60752	2.22831	-0.695057	1.34796	0.177671	0.566738	no
Glyma01g21500	Glyma01g21500	Glyma01g21500	Gm01:26596018-26599902	ws82-0	ws82-7	OK	49.2857	38.7886	-0.345534	0.727707	0.466793	0.809731	no
Glyma01g21510	Glyma01g21510	Glyma01g21510	Gm01:26672645-26677024	ws82-0	ws82-7	OK	1.16982	0.559249	-1.06473	1.11386	0.265337	0.662745	no
Glyma01g21521	Glyma01g21521	Glyma01g21521	Gm01:26725662-26726466	ws82-0	ws82-7	NOTEST	0	0	0	0	1	1	no
Glyma01g21530	Glyma01g21530	Glyma01g21530	Gm01:26737266-26739888	ws82-0	ws82-7	NOTEST	0.0722365	0	-1.79769e+308	-1.79769e+308	0.195141	1	no
Glyma01g21540	Glyma01g21540	Glyma01g21540	Gm01:26740703-26749646	ws82-0	ws82-7	NOTEST	0.260161	0.16031	-0.698537	0.478503	0.632292	1	no
Glyma01g21570	Glyma01g21570	Glyma01g21570	Gm01:26771286-26773122	ws82-0	ws82-7	NOTEST	0.0309867	0	-1.79769e+308	-1.79769e+308	0.217869	1	no
Glyma01g21575	Glyma01g21575	Glyma01g21575	Gm01:26798193-26799005	ws82-0	ws82-7	NOTEST	0	0	0	0	1	1	no
Glyma01g21580	Glyma01g21580	Glyma01g21580	Gm01:26814403-26817180	ws82-0	ws82-7	NOTEST	0	0	0	0	1	1	no
Glyma01g21590	Glyma01g21590	Glyma01g21590	Gm01:26883578-26885952	ws82-0	ws82-7	NOTEST	0	0	0	0	1	1	no
Glyma01g21620	Glyma01g21620	Glyma01g21620	Gm01:26918441-26921225	ws82-0	ws82-7	NOTEST	0.0370927	0	-1.79769e+308	-1.79769e+308	0.135176	1	no
Glyma01g21630	Glyma01g21630	Glyma01g21630	Gm01:26936772-26938129	ws82-0	ws82-7	NOTEST	0	0	0	0	1	1	no
Glyma01g21660	Glyma01g21660	Glyma01g21660	Gm01:27033743-27042354	ws82-0	ws82-7	OK	0.322811	0.820157	1.34521	-1.77382	0.0760936	0.38461	no
Glyma01g21680	Glyma01g21680	Glyma01g21680	Gm01:27082459-27084583	ws82-0	ws82-7	OK	6.12399	6.07568	-0.0114252	0.0224116	0.98212	0.996136	no
Glyma01g21707	Glyma01g21707	Glyma01g21707	Gm01:27099239-27134127	ws82-0	ws82-7	OK	4.05434	1.86164	-1.12289	1.80839	0.0705456	0.369725	no
Glyma01g21734	Glyma01g21734	Glyma01g21734	Gm01:27099239-27134127	ws82-0	ws82-7	OK	0.484278	0.820221	0.760176	-0.709976	0.477719	0.815772	no
Glyma01g21762	Glyma01g21762	Glyma01g21762	Gm01:27142763-27149757	ws82-0	ws82-7	NOTEST	0	0	0	0	1	1	no
Glyma01g21790	Glyma01g21790	Glyma01g21790	Gm01:27193609-27195324	ws82-0	ws82-7	NOTEST	0	0	0	0	1	1	no
Glyma01g21831	Glyma01g21831	Glyma01g21831	Gm01:27209475-27244035	ws82-0	ws82-7	OK	1.29649	0.426992	-1.60234	1.8026	0.071451	0.373	no
Glyma01g21870	Glyma01g21870	Glyma01g21870	Gm01:27283470-27283944	ws82-0	ws82-7	NOTEST	0	0	0	0	1	1	no
Glyma01g21900	Glyma01g21900	Glyma01g21900	Gm01:27377288-27379936	ws82-0	ws82-7	OK	4.47405	1.68495	-1.40888	2.4944	0.0126172	0.138452	no
Glyma01g22120	Glyma01g22120	Glyma01g22120	Gm01:27653934-27655968	ws82-0	ws82-7	NOTEST	0	0	0	0	1	1	no
Glyma01g22131	Glyma01g22131	Glyma01g22131	Gm01:27671430-27681519	ws82-0	ws82-7	NOTEST	0	0	0	0	1	1	no
Glyma01g22140	Glyma01g22140	Glyma01g22140	Gm01:27681952-27683220	ws82-0	ws82-7	NOTEST	0	0	0	0	1	1	no
Glyma01g22160	Glyma01g22160	Glyma01g22160	Gm01:27743827-27745117	ws82-0	ws82-7	OK	1.14954	0.875396	-0.393043	0.526336	0.598655	0.874417	no
Glyma01g22170	Glyma01g22170	Glyma01g22170	Gm01:27746481-27751766	ws82-0	ws82-7	OK	7.10978	11.0838	0.640582	-1.30758	0.191014	0.582631	no
Glyma01g22180	Glyma01g22180	Glyma01g22180	Gm01:27781683-27784987	ws82-0	ws82-7	OK	3.59083	2.40096	-0.580705	0.895959	0.370275	0.747185	no
Glyma01g22195	Glyma01g22195	Glyma01g22195	Gm01:27825362-27840530	ws82-0	ws82-7	NOTEST	0.173046	0.155215	-0.156884	0.0936649	0.925375	1	no
Glyma01g22210	Glyma01g22210	Glyma01g22210	Gm01:27825362-27840530	ws82-0	ws82-7	OK	2.65581	1.85854	-0.51498	0.702294	0.482496	0.817557	no
Glyma01g22260	Glyma01g22260	Glyma01g22260	Gm01:27963645-27965402	ws82-0	ws82-7	OK	5.15568	7.68468	0.575822	-1.1933	0.23275	0.628853	no
Glyma01g22333	Glyma01g22333	Glyma01g22333	Gm01:28079064-28083033	ws82-0	ws82-7	NOTEST	0	0.0649264	1.79769e+308	1.79769e+308	0.183103	1	no
Glyma01g22406	Glyma01g22406	Glyma01g22406	Gm01:28104831-28117466	ws82-0	ws82-7	OK	7.45741	7.32372	-0.0260977	0.0551913	0.955986	0.990217	no
Glyma01g22480	Glyma01g22480	Glyma01g22480	Gm01:28151173-28153211	ws82-0	ws82-7	OK	5.87735	2.18021	-1.4307	2.75988	0.00578231	0.0855709	no
Glyma01g22490	Glyma01g22490	Glyma01g22490	Gm01:28188535-28194784	ws82-0	ws82-7	OK	24.2203	18.9084	-0.357191	0.747204	0.45494	0.802082	no
Glyma01g22501	Glyma01g22501	Glyma01g22501	Gm01:28205872-28206502	ws82-0	ws82-7	NOTEST	0	0	0	0	1	1	no
Glyma01g22510	Glyma01g22510	Glyma01g22510	Gm01:28236453-28241841	ws82-0	ws82-7	OK	4.1873	1.78341	-1.23138	2.20579	0.0273987	0.223754	no
Glyma01g22530	Glyma01g22530	Glyma01g22530	Gm01:28336960-28340913	ws82-0	ws82-7	NOTEST	0.0856911	0.141234	0.720866	-0.592584	0.55346	1	no
Glyma01g22542	Glyma01g22542	Glyma01g22542	Gm01:28390587-28392968	ws82-0	ws82-7	OK	3.48456	3.27361	-0.090093	0.131855	0.895099	0.975294	no
Glyma01g22554	Glyma01g22554	Glyma01g22554	Gm01:28393068-28396339	ws82-0	ws82-7	OK	1.87104	1.71285	-0.127442	0.205909	0.836862	0.959093	no
Glyma01g22567	Glyma01g22567	Glyma01g22567	Gm01:28416197-28418758	ws82-0	ws82-7	NOTEST	0	0	0	0	1	1	no
Glyma01g22580	Glyma01g22580	Glyma01g22580	Gm01:28513351-28526497	ws82-0	ws82-7	OK	3.77657	3.50401	-0.108071	0.191136	0.848419	0.962251	no
Glyma01g22600	Glyma01g22600	Glyma01g22600	Gm01:28536103-28539838	ws82-0	ws82-7	OK	20.2563	17.6253	-0.200724	0.39734	0.691117	0.908626	no
Glyma01g22610	Glyma01g22610	Glyma01g22610	Gm01:28541141-28542499	ws82-0	ws82-7	NOTEST	0.064915	0.0834925	0.363096	-0.210065	0.833617	1	no
Glyma01g22620	Glyma01g22620	Glyma01g22620	Gm01:28543689-28553173	ws82-0	ws82-7	OK	92.3706	83.6664	-0.142785	0.260661	0.794354	0.947048	no
Glyma01g22630	Glyma01g22630	Glyma01g22630	Gm01:28591482-28597660	ws82-0	ws82-7	OK	3.52977	4.44696	0.333244	-0.664495	0.506373	0.830878	no
Glyma01g22641	Glyma01g22641	Glyma01g22641	Gm01:28636476-28637827	ws82-0	ws82-7	OK	2.83124	2.17788	-0.378513	0.604906	0.545241	0.849131	no
Glyma01g22650	Glyma01g22650	Glyma01g22650	Gm01:28639438-28642822	ws82-0	ws82-7	NOTEST	0	0	0	0	1	1	no
Glyma01g22670	Glyma01g22670	Glyma01g22670	Gm01:28699702-28704423	ws82-0	ws82-7	NOTEST	0	0	0	0	1	1	no
Glyma01g22680	Glyma01g22680	Glyma01g22680	Gm01:28708173-28714632	ws82-0	ws82-7	OK	21.1457	15.9298	-0.408639	0.785729	0.432026	0.786778	no
Glyma01g22710	Glyma01g22710	Glyma01g22710	Gm01:28768432-28773021	ws82-0	ws82-7	OK	1.59837	2.69658	0.754533	-1.47164	0.141119	0.51106	no
Glyma01g22720	Glyma01g22720	Glyma01g22720	Gm01:28773705-28774862	ws82-0	ws82-7	NOTEST	0.29509	0.0611071	-2.27174	1.28608	0.198414	1	no
Glyma01g22730	Glyma01g22730	Glyma01g22730	Gm01:28777549-28780388	ws82-0	ws82-7	NOTEST	0	0.0659074	1.79769e+308	1.79769e+308	0.107889	1	no
Glyma01g22751	Glyma01g22751	Glyma01g22751	Gm01:28847126-28848359	ws82-0	ws82-7	OK	0.0617481	0.625577	3.34072	-2.33354	0.0196197	0.182615	no
Glyma01g22770	Glyma01g22770	Glyma01g22770	Gm01:28902721-28902950	ws82-0	ws82-7	NOTEST	0	0	0	0	1	1	no
Glyma01g22800	Glyma01g22800	Glyma01g22800	Gm01:28928281-28929701	ws82-0	ws82-7	OK	0.833727	1.58666	0.928347	-1.4099	0.158569	0.539736	no
Glyma01g22830	Glyma01g22830	Glyma01g22830	Gm01:28986402-28988037	ws82-0	ws82-7	OK	0.541361	0.322357	-0.747933	0.821073	0.411605	0.77403	no
Glyma01g22840	Glyma01g22840	Glyma01g22840	Gm01:28991061-29005174	ws82-0	ws82-7	NOTEST	0.00765316	0.0102572	0.422511	-0.108194	0.913842	1	no
Glyma01g22850	Glyma01g22850	Glyma01g22850	Gm01:29076299-29082231	ws82-0	ws82-7	NOTEST	0	0	0	0	1	1	no
Glyma01g22861	Glyma01g22861	Glyma01g22861	Gm01:29092183-29093676	ws82-0	ws82-7	NOTEST	0	0	0	0	1	1	no
Glyma01g22871	Glyma01g22871	Glyma01g22871	Gm01:29147726-29148607	ws82-0	ws82-7	OK	2.95997	2.76812	-0.0966717	0.130968	0.8958	0.975379	no
Glyma01g22880	Glyma01g22880	Glyma01g22880	Gm01:29149880-29152191	ws82-0	ws82-7	NOTEST	0.158909	0.0528832	-1.58732	1.30972	0.190292	1	no
Glyma01g22910	Glyma01g22910	Glyma01g22910	Gm01:29193663-29195557	ws82-0	ws82-7	NOTEST	0	0	0	0	1	1	no
Glyma01g22927	Glyma01g22927	Glyma01g22927	Gm01:29230774-29239997	ws82-0	ws82-7	NOTEST	0	0.0706009	1.79769e+308	1.79769e+308	0.26143	1	no
Glyma01g22944	Glyma01g22944	Glyma01g22944	Gm01:29270621-29273823	ws82-0	ws82-7	NOTEST	0	0	0	0	1	1	no
Glyma01g22962	Glyma01g22962	Glyma01g22962	Gm01:29296975-29300243	ws82-0	ws82-7	NOTEST	0.0084936	0	-1.79769e+308	-1.79769e+308	0.262262	1	no
Glyma01g22980	Glyma01g22980	Glyma01g22980	Gm01:29388012-29389406	ws82-0	ws82-7	NOTEST	0	0	0	0	1	1	no
Glyma01g22990	Glyma01g22990	Glyma01g22990	Gm01:29393119-29399932	ws82-0	ws82-7	NOTEST	0.229021	0.335191	0.549505	-0.72328	0.469508	1	no
Glyma01g23015	Glyma01g23015	Glyma01g23015	Gm01:29421939-29425642	ws82-0	ws82-7	OK	1.70355	1.70214	-0.00119237	0.00114388	0.999087	0.99974	no
Glyma01g23040	Glyma01g23040	Glyma01g23040	Gm01:29470009-29471440	ws82-0	ws82-7	OK	5.27971	6.16689	0.224087	-0.43837	0.661118	0.896262	no
Glyma01g23056	Glyma01g23056	Glyma01g23056	Gm01:29471833-29483149	ws82-0	ws82-7	OK	3.10407	4.69838	0.597999	-1.19959	0.230297	0.625888	no
Glyma01g23072	Glyma01g23072	Glyma01g23072	Gm01:29511789-29512084	ws82-0	ws82-7	NOTEST	0	0	0	0	1	1	no
Glyma01g23089	Glyma01g23089	Glyma01g23089	Gm01:29533330-29533964	ws82-0	ws82-7	NOTEST	0	0	0	0	1	1	no
Glyma01g23106	Glyma01g23106	Glyma01g23106	Gm01:29535512-29536834	ws82-0	ws82-7	NOTEST	0.07971	0	-1.79769e+308	-1.79769e+308	0.217869	1	no
Glyma01g23123	Glyma01g23123	Glyma01g23123	Gm01:29537254-29537802	ws82-0	ws82-7	NOTEST	0	0	0	0	1	1	no
Glyma01g23140	Glyma01g23140	Glyma01g23140	Gm01:29565892-29574413	ws82-0	ws82-7	OK	0.488385	0.371191	-0.395857	0.596381	0.550921	0.852873	no
Glyma01g23150	Glyma01g23150	Glyma01g23150	Gm01:29660957-29665158	ws82-0	ws82-7	OK	5.01399	3.60076	-0.477658	0.962747	0.335675	0.723756	no
Glyma01g23180	Glyma01g23180	Glyma01g23180	Gm01:29699064-29704324	ws82-0	ws82-7	OK	4.14737	3.27906	-0.338914	0.693203	0.488182	0.820085	no
Glyma01g23196	Glyma01g23196	Glyma01g23196	Gm01:29809758-29827788	ws82-0	ws82-7	OK	2.7078	3.41421	0.334431	-0.568202	0.569898	0.859823	no
Glyma01g23213	Glyma01g23213	Glyma01g23213	Gm01:29809758-29827788	ws82-0	ws82-7	NOTEST	0.212304	0.13788	-0.622718	0.390103	0.69646	1	no
Glyma01g23230	Glyma01g23230	Glyma01g23230	Gm01:29843906-29847664	ws82-0	ws82-7	OK	6.13081	2.69714	-1.18465	2.30442	0.0211991	0.19116	no
Glyma01g23250	Glyma01g23250	Glyma01g23250	Gm01:29855703-29857266	ws82-0	ws82-7	NOTEST	0	0	0	0	1	1	no
Glyma01g23300	Glyma01g23300	Glyma01g23300	Gm01:29947728-29948872	ws82-0	ws82-7	NOTEST	0	0	0	0	1	1	no
Glyma01g23342	Glyma01g23342	Glyma01g23342	Gm01:29989093-29991297	ws82-0	ws82-7	NOTEST	0	0	0	0	1	1	no
Glyma01g23384	Glyma01g23384	Glyma01g23384	Gm01:30079377-30079787	ws82-0	ws82-7	OK	0.848672	1.26519	0.576077	-0.487601	0.625833	0.884336	no
Glyma01g23427	Glyma01g23427	Glyma01g23427	Gm01:30083471-30150322	ws82-0	ws82-7	OK	1.98886	1.36291	-0.545251	1.00983	0.312578	0.705275	no
Glyma01g23470	Glyma01g23470	Glyma01g23470	Gm01:30208373-30208835	ws82-0	ws82-7	NOTEST	0	0	0	0	1	1	no
Glyma01g23534	Glyma01g23534	Glyma01g23534	Gm01:30275109-30281645	ws82-0	ws82-7	NOTEST	0	0	0	0	1	1	no
Glyma01g23598	Glyma01g23598	Glyma01g23598	Gm01:30314496-30324821	ws82-0	ws82-7	OK	8.1036	6.60927	-0.294073	0.616767	0.537388	0.844885	no
Glyma01g23662	Glyma01g23662	Glyma01g23662	Gm01:30575165-30577235	ws82-0	ws82-7	NOTEST	0	0	0	0	1	1	no
Glyma01g23726	Glyma01g23726	Glyma01g23726	Gm01:30704826-30710568	ws82-0	ws82-7	OK	7.07961	8.81018	0.315503	-0.657029	0.511162	0.833362	no
Glyma01g23790	Glyma01g23790	Glyma01g23790	Gm01:30725259-30734274	ws82-0	ws82-7	NOTEST	0	0	0	0	1	1	no
Glyma01g23820	Glyma01g23820	Glyma01g23820	Gm01:30803138-30810796	ws82-0	ws82-7	OK	1.60513	2.36325	0.55808	-0.801811	0.422663	0.780306	no
Glyma01g23830	Glyma01g23830	Glyma01g23830	Gm01:30834278-30837915	ws82-0	ws82-7	OK	4.53601	4.52278	-0.00421542	0.00806712	0.993563	0.998611	no
Glyma01g23840	Glyma01g23840	Glyma01g23840	Gm01:30921784-30923363	ws82-0	ws82-7	NOTEST	0	0	0	0	1	1	no
Glyma01g23870	Glyma01g23870	Glyma01g23870	Gm01:31003666-31006666	ws82-0	ws82-7	OK	1.00857	13.7536	3.76943	-7.10804	1.17706e-12	1.09065e-09	yes
Glyma01g24100	Glyma01g24100	Glyma01g24100	Gm01:31272679-31276347	ws82-0	ws82-7	OK	38.4616	37.9992	-0.0174507	0.0368741	0.970585	0.993128	no
Glyma01g24115	Glyma01g24115	Glyma01g24115	Gm01:31363012-31365202	ws82-0	ws82-7	NOTEST	0	0	0	0	1	1	no
Glyma01g24130	Glyma01g24130	Glyma01g24130	Gm01:31382751-31384508	ws82-0	ws82-7	NOTEST	0	0	0	0	1	1	no
Glyma01g24136	Glyma01g24136	Glyma01g24136	Gm01:31384592-31388267	ws82-0	ws82-7	NOTEST	0	0	0	0	1	1	no
Glyma01g24143	Glyma01g24143	Glyma01g24143	Gm01:31403714-31405886	ws82-0	ws82-7	NOTEST	0	0	0	0	1	1	no
Glyma01g24150	Glyma01g24150	Glyma01g24150	Gm01:31406290-31410211	ws82-0	ws82-7	OK	1.34032	1.05557	-0.344556	0.472321	0.636698	0.887333	no
Glyma01g24160	Glyma01g24160	Glyma01g24160	Gm01:31442860-31443621	ws82-0	ws82-7	NOTEST	0	0.0739328	1.79769e+308	1.79769e+308	0.183103	1	no
Glyma01g24360	Glyma01g24360	Glyma01g24360	Gm01:31583729-31587255	ws82-0	ws82-7	OK	27.9758	22.8199	-0.29389	0.620819	0.534718	0.843494	no
Glyma01g24383	Glyma01g24383	Glyma01g24383	Gm01:31655035-31655556	ws82-0	ws82-7	NOTEST	0	0	0	0	1	1	no
Glyma01g24406	Glyma01g24406	Glyma01g24406	Gm01:31704492-31706592	ws82-0	ws82-7	NOTEST	0.176903	0.110913	-0.673528	0.326239	0.744244	1	no
Glyma01g24430	Glyma01g24430	Glyma01g24430	Gm01:31720084-31726752	ws82-0	ws82-7	OK	3.73552	3.48634	-0.0995936	0.182686	0.855045	0.963965	no
Glyma01g24455	Glyma01g24455	Glyma01g24455	Gm01:31734753-31736467	ws82-0	ws82-7	NOTEST	0.0832449	0.0922447	0.148105	-0.113382	0.909728	1	no
Glyma01g24480	Glyma01g24480	Glyma01g24480	Gm01:31792540-31792932	ws82-0	ws82-7	OK	2.39947	8.68701	1.85614	-2.51673	0.0118449	0.133503	no
Glyma01g24495	Glyma01g24495	Glyma01g24495	Gm01:31795450-31795885	ws82-0	ws82-7	OK	0.634387	0.607378	-0.0627683	0.0480525	0.961674	0.991306	no
Glyma01g24510	Glyma01g24510	Glyma01g24510	Gm01:31818673-31828608	ws82-0	ws82-7	OK	2.36279	2.00902	-0.234001	0.443505	0.6574	0.894708	no
Glyma01g24515	Glyma01g24515	Glyma01g24515	Gm01:31889614-31891603	ws82-0	ws82-7	NOTEST	0	0	0	0	1	1	no
Glyma01g24520	Glyma01g24520	Glyma01g24520	Gm01:31911765-31920749	ws82-0	ws82-7	OK	3.91209	5.6452	0.529083	-0.868787	0.384964	0.756979	no
Glyma01g24530	Glyma01g24530	Glyma01g24530	Gm01:31964428-31977723	ws82-0	ws82-7	OK	0.588162	0.299854	-0.971953	1.29938	0.193814	0.586578	no
Glyma01g24536	Glyma01g24536	Glyma01g24536	Gm01:31981604-31985794	ws82-0	ws82-7	NOTEST	0	0	0	0	1	1	no
Glyma01g24543	Glyma01g24543	Glyma01g24543	Gm01:32028704-32031074	ws82-0	ws82-7	NOTEST	0	0	0	0	1	1	no
Glyma01g24550	Glyma01g24550	Glyma01g24550	Gm01:32033425-32036205	ws82-0	ws82-7	OK	2.90836	4.82635	0.730728	-1.05244	0.292596	0.687275	no
Glyma01g24570	Glyma01g24570	Glyma01g24570	Gm01:32066869-32072424	ws82-0	ws82-7	OK	7.05035	6.24357	-0.175323	0.329758	0.741583	0.928354	no
Glyma01g24580	Glyma01g24580	Glyma01g24580	Gm01:32077414-32078744	ws82-0	ws82-7	NOTEST	0	0	0	0	1	1	no
Glyma01g24601	Glyma01g24601	Glyma01g24601	Gm01:32084232-32086938	ws82-0	ws82-7	OK	6.15828	9.40441	0.610809	-0.887513	0.374803	0.749966	no
Glyma01g24620	Glyma01g24620	Glyma01g24620	Gm01:32161499-32162094	ws82-0	ws82-7	NOTEST	0	0	0	0	1	1	no
Glyma01g24650	Glyma01g24650	Glyma01g24650	Gm01:32202535-32211787	ws82-0	ws82-7	OK	2.3736	3.28129	0.467184	-0.823216	0.410385	0.773133	no
Glyma01g24670	Glyma01g24670	Glyma01g24670	Gm01:32220914-32223882	ws82-0	ws82-7	OK	0.510048	0.226224	-1.17288	1.57837	0.114481	0.47026	no
Glyma01g24680	Glyma01g24680	Glyma01g24680	Gm01:32231085-32231557	ws82-0	ws82-7	NOTEST	0	0	0	0	1	1	no
Glyma01g24710	Glyma01g24710	Glyma01g24710	Gm01:32287633-32289710	ws82-0	ws82-7	NOTEST	0.0420881	0.109746	1.38268	-1.21662	0.223749	1	no
Glyma01g24715	Glyma01g24715	Glyma01g24715	Gm01:32301822-32302361	ws82-0	ws82-7	NOTEST	0	0	0	0	1	1	no
Glyma01g24720	Glyma01g24720	Glyma01g24720	Gm01:32308210-32311363	ws82-0	ws82-7	NOTEST	0	0	0	0	1	1	no
Glyma01g24735	Glyma01g24735	Glyma01g24735	Gm01:32401120-32402034	ws82-0	ws82-7	NOTEST	0	0	0	0	1	1	no
Glyma01g24750	Glyma01g24750	Glyma01g24750	Gm01:32402350-32403396	ws82-0	ws82-7	NOTEST	0	0	0	0	1	1	no
Glyma01g24771	Glyma01g24771	Glyma01g24771	Gm01:32417415-32418160	ws82-0	ws82-7	NOTEST	0	0	0	0	1	1	no
Glyma01g24790	Glyma01g24790	Glyma01g24790	Gm01:32422309-32422465	ws82-0	ws82-7	NOTEST	0	0	0	0	1	1	no
Glyma01g24801	Glyma01g24801	Glyma01g24801	Gm01:32490914-32491358	ws82-0	ws82-7	NOTEST	0	0	0	0	1	1	no
Glyma01g24811	Glyma01g24811	Glyma01g24811	Gm01:32561178-32561613	ws82-0	ws82-7	NOTEST	0	0	0	0	1	1	no
Glyma01g24820	Glyma01g24820	Glyma01g24820	Gm01:32606517-32608233	ws82-0	ws82-7	NOTEST	0	0	0	0	1	1	no
Glyma01g24835	Glyma01g24835	Glyma01g24835	Gm01:32612017-32613710	ws82-0	ws82-7	NOTEST	0	0	0	0	1	1	no
Glyma01g24850	Glyma01g24850	Glyma01g24850	Gm01:32687318-32692418	ws82-0	ws82-7	NOTEST	0	0	0	0	1	1	no
Glyma01g24870	Glyma01g24870	Glyma01g24870	Gm01:32782513-32787123	ws82-0	ws82-7	NOTEST	0.0290699	0.0537271	0.886122	-0.55352	0.579907	1	no
Glyma01g24880	Glyma01g24880	Glyma01g24880	Gm01:32798562-32800071	ws82-0	ws82-7	OK	13.9069	6.92275	-1.00638	2.01789	0.0436026	0.28748	no
Glyma01g24900	Glyma01g24900	Glyma01g24900	Gm01:32814004-32817943	ws82-0	ws82-7	OK	6.40175	6.7417	0.0746461	-0.142018	0.887066	0.973079	no
Glyma01g24915	Glyma01g24915	Glyma01g24915	Gm01:32834808-32836555	ws82-0	ws82-7	NOTEST	0	0	0	0	1	1	no
Glyma01g24931	Glyma01g24931	Glyma01g24931	Gm01:32867175-32870537	ws82-0	ws82-7	OK	23.2028	31.446	0.438575	-0.92462	0.355164	0.737297	no
Glyma01g24945	Glyma01g24945	Glyma01g24945	Gm01:32870727-32871773	ws82-0	ws82-7	OK	14.3181	18.3086	0.354681	-0.719861	0.471611	0.812871	no
Glyma01g24960	Glyma01g24960	Glyma01g24960	Gm01:32900893-32902163	ws82-0	ws82-7	NOTEST	0	0	0	0	1	1	no
Glyma01g24975	Glyma01g24975	Glyma01g24975	Gm01:33011689-33012355	ws82-0	ws82-7	NOTEST	0	0	0	0	1	1	no
Glyma01g24990	Glyma01g24990	Glyma01g24990	Gm01:33023697-33026836	ws82-0	ws82-7	NOTEST	0	0	0	0	1	1	no
Glyma01g25000	Glyma01g25000	Glyma01g25000	Gm01:33038313-33043683	ws82-0	ws82-7	NOTEST	0.0430504	0	-1.79769e+308	-1.79769e+308	0.237698	1	no
Glyma01g25010	Glyma01g25010	Glyma01g25010	Gm01:33122056-33128090	ws82-0	ws82-7	OK	1.46518	0.472725	-1.63201	2.25465	0.0241553	0.207776	no
Glyma01g25040	Glyma01g25040	Glyma01g25040	Gm01:33159095-33163007	ws82-0	ws82-7	OK	4.82323	4.71837	-0.0317112	0.062867	0.949872	0.988495	no
Glyma01g25116	Glyma01g25116	Glyma01g25116	Gm01:33175920-33176216	ws82-0	ws82-7	NOTEST	0	0	0	0	1	1	no
Glyma01g25193	Glyma01g25193	Glyma01g25193	Gm01:33176938-33177664	ws82-0	ws82-7	NOTEST	0	0	0	0	1	1	no
Glyma01g25270	Glyma01g25270	Glyma01g25270	Gm01:33300641-33305517	ws82-0	ws82-7	OK	16.542	5.37752	-1.62112	3.3069	0.000943338	0.025409	yes
Glyma01g25690	Glyma01g25690	Glyma01g25690	Gm01:33714521-33724227	ws82-0	ws82-7	OK	1.72133	8.87099	2.36557	-4.459	8.23413e-06	0.000653188	yes
Glyma01g25710	Glyma01g25710	Glyma01g25710	Gm01:33743092-33750073	ws82-0	ws82-7	OK	1.17063	0.89667	-0.38464	0.625504	0.53164	0.842352	no
Glyma01g25734	Glyma01g25734	Glyma01g25734	Gm01:33873561-33877219	ws82-0	ws82-7	NOTEST	0	0	0	0	1	1	no
Glyma01g25758	Glyma01g25758	Glyma01g25758	Gm01:33877681-33878910	ws82-0	ws82-7	NOTEST	0	0	0	0	1	1	no
Glyma01g25782	Glyma01g25782	Glyma01g25782	Gm01:33892028-33896774	ws82-0	ws82-7	NOTEST	0.0176197	0.0772144	2.13168	-0.982725	0.325743	1	no
Glyma01g25806	Glyma01g25806	Glyma01g25806	Gm01:33911123-33912252	ws82-0	ws82-7	NOTEST	0	0	0	0	1	1	no
Glyma01g25830	Glyma01g25830	Glyma01g25830	Gm01:33967102-33969353	ws82-0	ws82-7	OK	10.5236	13.1925	0.32609	-0.68992	0.490244	0.820605	no
Glyma01g25861	Glyma01g25861	Glyma01g25861	Gm01:33970039-33970770	ws82-0	ws82-7	NOTEST	0	0	0	0	1	1	no
Glyma01g25890	Glyma01g25890	Glyma01g25890	Gm01:34032831-34039400	ws82-0	ws82-7	OK	15.0877	3.39269	-2.15287	4.3097	1.63474e-05	0.00111343	yes
Glyma01g25903	Glyma01g25903	Glyma01g25903	Gm01:34110636-34112307	ws82-0	ws82-7	NOTEST	0	0.099614	1.79769e+308	1.79769e+308	0.183103	1	no
Glyma01g25916	Glyma01g25916	Glyma01g25916	Gm01:34210140-34210872	ws82-0	ws82-7	NOTEST	0	0	0	0	1	1	no
Glyma01g25930	Glyma01g25930	Glyma01g25930	Gm01:34244964-34245805	ws82-0	ws82-7	NOTEST	0.329921	0.366921	0.153347	-0.14553	0.884293	1	no
Glyma01g25940	Glyma01g25940	Glyma01g25940	Gm01:34287073-34295334	ws82-0	ws82-7	OK	23.2213	26.5878	0.195319	-0.381832	0.702586	0.914303	no
Glyma01g25960	Glyma01g25960	Glyma01g25960	Gm01:34329634-34332496	ws82-0	ws82-7	OK	0.546799	1.99191	1.86507	-2.2881	0.0221316	0.196472	no
Glyma01g25980	Glyma01g25980	Glyma01g25980	Gm01:34344570-34345856	ws82-0	ws82-7	NOTEST	0	0	0	0	1	1	no
Glyma01g26010	Glyma01g26010	Glyma01g26010	Gm01:34353206-34357427	ws82-0	ws82-7	NOTEST	0.0225051	0.0434409	0.948801	-0.592673	0.5534	1	no
Glyma01g26220	Glyma01g26220	Glyma01g26220	Gm01:34484074-34486309	ws82-0	ws82-7	OK	2.81438	2.00648	-0.488149	0.806523	0.419942	0.778251	no
Glyma01g26230	Glyma01g26230	Glyma01g26230	Gm01:34508385-34510490	ws82-0	ws82-7	OK	1.33676	6.33044	2.24357	-3.63876	0.000273953	0.0102081	yes
Glyma01g26300	Glyma01g26300	Glyma01g26300	Gm01:34545482-34547230	ws82-0	ws82-7	OK	6.76861	5.58324	-0.277758	0.511851	0.608755	0.878318	no
Glyma01g26310	Glyma01g26310	Glyma01g26310	Gm01:34591834-34592752	ws82-0	ws82-7	NOTEST	0	0	0	0	1	1	no
Glyma01g26325	Glyma01g26325	Glyma01g26325	Gm01:34678298-34679472	ws82-0	ws82-7	NOTEST	0	0	0	0	1	1	no
Glyma01g26340	Glyma01g26340	Glyma01g26340	Gm01:34729733-34732217	ws82-0	ws82-7	NOTEST	0.124044	0.152444	0.297433	-0.320235	0.74879	1	no
Glyma01g26350	Glyma01g26350	Glyma01g26350	Gm01:34828578-34838846	ws82-0	ws82-7	OK	2.33781	2.87656	0.299188	-0.580591	0.561516	0.857174	no
Glyma01g26360	Glyma01g26360	Glyma01g26360	Gm01:34923320-34923989	ws82-0	ws82-7	OK	19.9089	15.0553	-0.403139	0.784344	0.432838	0.787535	no
Glyma01g26570	Glyma01g26570	Glyma01g26570	Gm01:35047812-35050350	ws82-0	ws82-7	NOTEST	0.0928988	0	-1.79769e+308	-1.79769e+308	0.0595194	1	no
Glyma01g26580	Glyma01g26580	Glyma01g26580	Gm01:35128362-35132942	ws82-0	ws82-7	NOTEST	0.0596032	0.0400938	-0.572009	0.277066	0.78173	1	no
Glyma01g26590	Glyma01g26590	Glyma01g26590	Gm01:35185581-35190582	ws82-0	ws82-7	NOTEST	0.0683897	0.07703	0.17164	-0.184799	0.853386	1	no
Glyma01g26600	Glyma01g26600	Glyma01g26600	Gm01:35191726-35193878	ws82-0	ws82-7	OK	7.99851	4.88734	-0.71068	1.34722	0.177911	0.567178	no
Glyma01g26606	Glyma01g26606	Glyma01g26606	Gm01:35221753-35222332	ws82-0	ws82-7	NOTEST	0	0	0	0	1	1	no
Glyma01g26613	Glyma01g26613	Glyma01g26613	Gm01:35260947-35261763	ws82-0	ws82-7	NOTEST	0	0	0	0	1	1	no
Glyma01g26620	Glyma01g26620	Glyma01g26620	Gm01:35271480-35272153	ws82-0	ws82-7	NOTEST	0	0	0	0	1	1	no
Glyma01g26650	Glyma01g26650	Glyma01g26650	Gm01:35317654-35328670	ws82-0	ws82-7	OK	1.68997	2.00329	0.245373	-0.408028	0.683253	0.90579	no
Glyma01g26670	Glyma01g26670	Glyma01g26670	Gm01:35431736-35435954	ws82-0	ws82-7	OK	0.98692	0.563531	-0.808438	1.0817	0.279388	0.67517	no
Glyma01g26681	Glyma01g26681	Glyma01g26681	Gm01:35464370-35465052	ws82-0	ws82-7	NOTEST	0	0	0	0	1	1	no
Glyma01g26690	Glyma01g26690	Glyma01g26690	Gm01:35468032-35472931	ws82-0	ws82-7	OK	0.47829	0.899179	0.910722	-1.1858	0.235701	0.632559	no
Glyma01g26700	Glyma01g26700	Glyma01g26700	Gm01:35501543-35506434	ws82-0	ws82-7	OK	2.96878	1.52082	-0.965017	1.65399	0.0981305	0.436693	no
Glyma01g26750	Glyma01g26750	Glyma01g26750	Gm01:35572394-35581615	ws82-0	ws82-7	NOTEST	0.0559291	0.110618	0.983912	-0.78329	0.433457	1	no
Glyma01g26766	Glyma01g26766	Glyma01g26766	Gm01:35587717-35588464	ws82-0	ws82-7	NOTEST	0	0	0	0	1	1	no
Glyma01g26783	Glyma01g26783	Glyma01g26783	Gm01:35595556-35596652	ws82-0	ws82-7	NOTEST	0	0	0	0	1	1	no
Glyma01g26800	Glyma01g26800	Glyma01g26800	Gm01:35606472-35610217	ws82-0	ws82-7	NOTEST	0	0	0	0	1	1	no
Glyma01g26813	Glyma01g26813	Glyma01g26813	Gm01:35625153-35625890	ws82-0	ws82-7	NOTEST	0	0	0	0	1	1	no
Glyma01g26826	Glyma01g26826	Glyma01g26826	Gm01:35632686-35633208	ws82-0	ws82-7	NOTEST	0	0	0	0	1	1	no
Glyma01g26840	Glyma01g26840	Glyma01g26840	Gm01:35643767-35646603	ws82-0	ws82-7	OK	7.2489	5.31045	-0.448928	0.848372	0.396231	0.763961	no
Glyma01g26860	Glyma01g26860	Glyma01g26860	Gm01:35688241-35692239	ws82-0	ws82-7	NOTEST	0	0	0	0	1	1	no
Glyma01g26900	Glyma01g26900	Glyma01g26900	Gm01:35719443-35723183	ws82-0	ws82-7	NOTEST	0	0	0	0	1	1	no
Glyma01g26915	Glyma01g26915	Glyma01g26915	Gm01:35827768-35828303	ws82-0	ws82-7	NOTEST	0	0	0	0	1	1	no
Glyma01g26930	Glyma01g26930	Glyma01g26930	Gm01:35832934-35837033	ws82-0	ws82-7	OK	27.9848	22.0775	-0.342067	0.637332	0.523909	0.838354	no
Glyma01g26940	Glyma01g26940	Glyma01g26940	Gm01:35863797-35865409	ws82-0	ws82-7	OK	2.30012	3.68429	0.67968	-1.17607	0.239565	0.636301	no
Glyma01g26950	Glyma01g26950	Glyma01g26950	Gm01:35866292-35869400	ws82-0	ws82-7	OK	37.5037	29.9574	-0.324123	0.67048	0.502552	0.828316	no
Glyma01g26961	Glyma01g26961	Glyma01g26961	Gm01:35952581-35954091	ws82-0	ws82-7	NOTEST	0	0	0	0	1	1	no
Glyma01g26970	Glyma01g26970	Glyma01g26970	Gm01:35963018-35964248	ws82-0	ws82-7	OK	18.7175	30.0728	0.684071	-1.44467	0.14855	0.523415	no
Glyma01g26981	Glyma01g26981	Glyma01g26981	Gm01:35964318-35966630	ws82-0	ws82-7	OK	7.00343	2.31283	-1.5984	1.88329	0.0596608	0.338918	no
Glyma01g26990	Glyma01g26990	Glyma01g26990	Gm01:35968043-35972769	ws82-0	ws82-7	OK	1.43979	4.81972	1.74309	-3.24454	0.00117639	0.0296893	yes
Glyma01g27005	Glyma01g27005	Glyma01g27005	Gm01:35977333-35983210	ws82-0	ws82-7	OK	1.80417	0.804239	-1.16564	1.99426	0.0461231	0.296698	no
Glyma01g27020	Glyma01g27020	Glyma01g27020	Gm01:36004326-36005428	ws82-0	ws82-7	NOTEST	0.0357043	0.0587875	0.719412	-0.311376	0.755515	1	no
Glyma01g27040	Glyma01g27040	Glyma01g27040	Gm01:36021672-36025699	ws82-0	ws82-7	OK	0.133922	0.93732	2.80715	-3.44473	0.000571638	0.0177903	yes
Glyma01g27060	Glyma01g27060	Glyma01g27060	Gm01:36063450-36065354	ws82-0	ws82-7	OK	1.56602	1.82812	0.223261	-0.354934	0.722639	0.921717	no
Glyma01g27110	Glyma01g27110	Glyma01g27110	Gm01:36127733-36131641	ws82-0	ws82-7	NOTEST	0	0	0	0	1	1	no
Glyma01g27120	Glyma01g27120	Glyma01g27120	Gm01:36147154-36151735	ws82-0	ws82-7	OK	1.62651	0.275371	-2.56233	3.40978	0.000650144	0.0195208	yes
Glyma01g27130	Glyma01g27130	Glyma01g27130	Gm01:36161870-36165133	ws82-0	ws82-7	NOTEST	0.295368	0.290194	-0.0254941	0.0290717	0.976807	1	no
Glyma01g27145	Glyma01g27145	Glyma01g27145	Gm01:36192774-36194659	ws82-0	ws82-7	NOTEST	0	0	0	0	1	1	no
Glyma01g27160	Glyma01g27160	Glyma01g27160	Gm01:36195997-36196273	ws82-0	ws82-7	NOTEST	0	0	0	0	1	1	no
Glyma01g27170	Glyma01g27170	Glyma01g27170	Gm01:36211478-36213198	ws82-0	ws82-7	OK	0.625074	2.11106	1.75587	-1.85133	0.0641228	0.352109	no
Glyma01g27200	Glyma01g27200	Glyma01g27200	Gm01:36246044-36251145	ws82-0	ws82-7	OK	9.68798	6.13081	-0.660118	1.34978	0.177085	0.566131	no
Glyma01g27215	Glyma01g27215	Glyma01g27215	Gm01:36263859-36271059	ws82-0	ws82-7	NOTEST	0	0.237819	1.79769e+308	1.79769e+308	0.100645	1	no
Glyma01g27230	Glyma01g27230	Glyma01g27230	Gm01:36326563-36327062	ws82-0	ws82-7	NOTEST	0	0	0	0	1	1	no
Glyma01g27240	Glyma01g27240	Glyma01g27240	Gm01:36332421-36351694	ws82-0	ws82-7	OK	6.22488	6.32057	0.02201	-0.0449289	0.964164	0.991465	no
Glyma01g27250	Glyma01g27250	Glyma01g27250	Gm01:36369066-36382267	ws82-0	ws82-7	OK	6.45509	6.12739	-0.0751649	0.158676	0.873924	0.968993	no
Glyma01g27260	Glyma01g27260	Glyma01g27260	Gm01:36388728-36391729	ws82-0	ws82-7	NOTEST	0	0	0	0	1	1	no
Glyma01g27280	Glyma01g27280	Glyma01g27280	Gm01:36438459-36440199	ws82-0	ws82-7	OK	1.03804	1.48995	0.521409	-0.760538	0.446933	0.797978	no
Glyma01g27291	Glyma01g27291	Glyma01g27291	Gm01:36450899-36454001	ws82-0	ws82-7	OK	0.1241	0.723044	2.54258	-1.40841	0.159011	0.540519	no
Glyma01g27301	Glyma01g27301	Glyma01g27301	Gm01:36450899-36454001	ws82-0	ws82-7	NOTEST	0	0	0	0	1	1	no
Glyma01g27310	Glyma01g27310	Glyma01g27310	Gm01:36464465-36465566	ws82-0	ws82-7	NOTEST	0	0	0	0	1	1	no
Glyma01g27360	Glyma01g27360	Glyma01g27360	Gm01:36545021-36547291	ws82-0	ws82-7	OK	0.10889	0.412886	1.92287	-2.40569	0.0161421	0.160975	no
Glyma01g27385	Glyma01g27385	Glyma01g27385	Gm01:36610052-36610460	ws82-0	ws82-7	NOTEST	0	0	0	0	1	1	no
Glyma01g27410	Glyma01g27410	Glyma01g27410	Gm01:36654803-36655111	ws82-0	ws82-7	NOTEST	0	0	0	0	1	1	no
Glyma01g27440	Glyma01g27440	Glyma01g27440	Gm01:36685735-36695527	ws82-0	ws82-7	NOTEST	0.0764779	0.0094379	-3.01851	1.18047	0.237813	1	no
Glyma01g27455	Glyma01g27455	Glyma01g27455	Gm01:36705021-36712560	ws82-0	ws82-7	NOTEST	0.141757	0.0561534	-1.33598	1.50557	0.132179	1	no
Glyma01g27470	Glyma01g27470	Glyma01g27470	Gm01:36735448-36737186	ws82-0	ws82-7	NOTEST	0	0.0209658	1.79769e+308	1.79769e+308	0.183103	1	no
Glyma01g27490	Glyma01g27490	Glyma01g27490	Gm01:36794254-36798874	ws82-0	ws82-7	NOTEST	0.0286113	0	-1.79769e+308	-1.79769e+308	0.264404	1	no
Glyma01g27710	Glyma01g27710	Glyma01g27710	Gm01:36987889-36992462	ws82-0	ws82-7	OK	1.53738	3.39672	1.14367	-2.08829	0.0367719	0.261887	no
Glyma01g27720	Glyma01g27720	Glyma01g27720	Gm01:37036140-37038376	ws82-0	ws82-7	OK	0.683984	0.743203	0.119792	-0.163677	0.869986	0.968076	no
Glyma01g27765	Glyma01g27765	Glyma01g27765	Gm01:37212445-37213145	ws82-0	ws82-7	NOTEST	0	0	0	0	1	1	no
Glyma01g27810	Glyma01g27810	Glyma01g27810	Gm01:37231576-37233997	ws82-0	ws82-7	OK	17.9261	10.9508	-0.711024	1.4978	0.134184	0.501259	no
Glyma01g27840	Glyma01g27840	Glyma01g27840	Gm01:37299487-37305059	ws82-0	ws82-7	OK	13.2002	17.6097	0.415813	-0.878691	0.379569	0.753021	no
Glyma01g27860	Glyma01g27860	Glyma01g27860	Gm01:37321469-37321784	ws82-0	ws82-7	NOTEST	0	0	0	0	1	1	no
Glyma01g27890	Glyma01g27890	Glyma01g27890	Gm01:37336991-37338203	ws82-0	ws82-7	NOTEST	0	0.283386	1.79769e+308	1.79769e+308	0.0168552	1	no
Glyma01g27900	Glyma01g27900	Glyma01g27900	Gm01:37379998-37383931	ws82-0	ws82-7	OK	14.6649	5.65114	-1.37575	2.86991	0.00410591	0.0693753	no
Glyma01g27910	Glyma01g27910	Glyma01g27910	Gm01:37406845-37408224	ws82-0	ws82-7	NOTEST	0	0	0	0	1	1	no
Glyma01g27941	Glyma01g27941	Glyma01g27941	Gm01:37433263-37434146	ws82-0	ws82-7	NOTEST	0	0	0	0	1	1	no
Glyma01g27970	Glyma01g27970	Glyma01g27970	Gm01:37457417-37460795	ws82-0	ws82-7	NOTEST	0.0498673	0	-1.79769e+308	-1.79769e+308	0.135176	1	no
Glyma01g28026	Glyma01g28026	Glyma01g28026	Gm01:37580338-37581229	ws82-0	ws82-7	NOTEST	0	0	0	0	1	1	no
Glyma01g28082	Glyma01g28082	Glyma01g28082	Gm01:37587054-37587942	ws82-0	ws82-7	NOTEST	0	0	0	0	1	1	no
Glyma01g28139	Glyma01g28139	Glyma01g28139	Gm01:37594369-37595242	ws82-0	ws82-7	NOTEST	0	0	0	0	1	1	no
Glyma01g28196	Glyma01g28196	Glyma01g28196	Gm01:37611247-37612183	ws82-0	ws82-7	NOTEST	0	0	0	0	1	1	no
Glyma01g28253	Glyma01g28253	Glyma01g28253	Gm01:37911350-37912244	ws82-0	ws82-7	NOTEST	0	0	0	0	1	1	no
Glyma01g28310	Glyma01g28310	Glyma01g28310	Gm01:37913283-37917411	ws82-0	ws82-7	OK	2.79169	1.39974	-0.995983	1.37942	0.167765	0.553302	no
Glyma01g28353	Glyma01g28353	Glyma01g28353	Gm01:38060909-38061301	ws82-0	ws82-7	NOTEST	0	0	0	0	1	1	no
Glyma01g28396	Glyma01g28396	Glyma01g28396	Gm01:38199627-38200321	ws82-0	ws82-7	OK	258.101	192.347	-0.424222	0.882231	0.377652	0.751453	no
Glyma01g28440	Glyma01g28440	Glyma01g28440	Gm01:38205261-38207629	ws82-0	ws82-7	OK	3.16693	1.33277	-1.24866	2.22974	0.0257648	0.214898	no
Glyma01g28460	Glyma01g28460	Glyma01g28460	Gm01:38222786-38224222	ws82-0	ws82-7	NOTEST	0	0	0	0	1	1	no
Glyma01g28480	Glyma01g28480	Glyma01g28480	Gm01:38248791-38250401	ws82-0	ws82-7	NOTEST	0	0	0	0	1	1	no
Glyma01g28491	Glyma01g28491	Glyma01g28491	Gm01:38259681-38270227	ws82-0	ws82-7	NOTEST	0	0	0	0	1	1	no
Glyma01g28500	Glyma01g28500	Glyma01g28500	Gm01:38308110-38309077	ws82-0	ws82-7	OK	71.2203	96.0213	0.431065	-0.903261	0.366388	0.745743	no
Glyma01g28511	Glyma01g28511	Glyma01g28511	Gm01:38309608-38311167	ws82-0	ws82-7	NOTEST	0.0369106	0	-1.79769e+308	-1.79769e+308	0.135176	1	no
Glyma01g28520	Glyma01g28520	Glyma01g28520	Gm01:38386523-38391051	ws82-0	ws82-7	OK	7.03429	4.92232	-0.515067	0.866316	0.386317	0.757621	no
Glyma01g28550	Glyma01g28550	Glyma01g28550	Gm01:38422858-38424428	ws82-0	ws82-7	NOTEST	0	0	0	0	1	1	no
Glyma01g28626	Glyma01g28626	Glyma01g28626	Gm01:38529390-38530425	ws82-0	ws82-7	NOTEST	0	0	0	0	1	1	no
Glyma01g28703	Glyma01g28703	Glyma01g28703	Gm01:38575000-38577422	ws82-0	ws82-7	OK	1.6567	1.03481	-0.678946	0.838351	0.401834	0.768523	no
Glyma01g28780	Glyma01g28780	Glyma01g28780	Gm01:38596171-38598279	ws82-0	ws82-7	NOTEST	0.103933	0.0331118	-1.65023	1.23986	0.215028	1	no
Glyma01g28800	Glyma01g28800	Glyma01g28800	Gm01:38660680-38662575	ws82-0	ws82-7	NOTEST	0	0	0	0	1	1	no
Glyma01g28805	Glyma01g28805	Glyma01g28805	Gm01:38690273-38690984	ws82-0	ws82-7	NOTEST	0	0	0	0	1	1	no
Glyma01g28810	Glyma01g28810	Glyma01g28810	Gm01:38692764-38695649	ws82-0	ws82-7	OK	2407.89	2348.01	-0.0363298	0.0471188	0.962419	0.991465	no
Glyma01g28820	Glyma01g28820	Glyma01g28820	Gm01:38703774-38707276	ws82-0	ws82-7	OK	77.2339	66.2935	-0.220366	0.40325	0.686765	0.907247	no
Glyma01g28830	Glyma01g28830	Glyma01g28830	Gm01:38709310-38713735	ws82-0	ws82-7	OK	9.53748	18.7667	0.976495	-2.04776	0.0405837	0.277384	no
Glyma01g28841	Glyma01g28841	Glyma01g28841	Gm01:38749817-38751606	ws82-0	ws82-7	NOTEST	0	0	0	0	1	1	no
Glyma01g28850	Glyma01g28850	Glyma01g28850	Gm01:38758937-38772979	ws82-0	ws82-7	NOTEST	0.0319629	0	-1.79769e+308	-1.79769e+308	0.135176	1	no
Glyma01g28865	Glyma01g28865	Glyma01g28865	Gm01:38774846-38778332	ws82-0	ws82-7	NOTEST	0	0	0	0	1	1	no
Glyma01g28880	Glyma01g28880	Glyma01g28880	Gm01:38811474-38819368	ws82-0	ws82-7	NOTEST	0.0336957	0	-1.79769e+308	-1.79769e+308	0.135176	1	no
Glyma01g28890	Glyma01g28890	Glyma01g28890	Gm01:38825959-38830479	ws82-0	ws82-7	NOTEST	0	0	0	0	1	1	no
Glyma01g28936	Glyma01g28936	Glyma01g28936	Gm01:38986023-38989868	ws82-0	ws82-7	OK	0.881729	0.230757	-1.93396	2.74679	0.00601809	0.0875019	no
Glyma01g28983	Glyma01g28983	Glyma01g28983	Gm01:39101552-39101978	ws82-0	ws82-7	NOTEST	0	0	0	0	1	1	no
Glyma01g29030	Glyma01g29030	Glyma01g29030	Gm01:39117816-39121119	ws82-0	ws82-7	NOTEST	0.126236	0.046433	-1.4429	1.3495	0.177176	1	no
Glyma01g29070	Glyma01g29070	Glyma01g29070	Gm01:39200746-39201279	ws82-0	ws82-7	NOTEST	0	0	0	0	1	1	no
Glyma01g29091	Glyma01g29091	Glyma01g29091	Gm01:39202322-39203074	ws82-0	ws82-7	NOTEST	0	0	0	0	1	1	no
Glyma01g29110	Glyma01g29110	Glyma01g29110	Gm01:39206637-39207905	ws82-0	ws82-7	NOTEST	0	0	0	0	1	1	no
Glyma01g29131	Glyma01g29131	Glyma01g29131	Gm01:39211228-39211501	ws82-0	ws82-7	NOTEST	0	0	0	0	1	1	no
Glyma01g29150	Glyma01g29150	Glyma01g29150	Gm01:39249319-39254445	ws82-0	ws82-7	OK	1.16197	1.96655	0.759096	-1.33476	0.181955	0.572694	no
Glyma01g29171	Glyma01g29171	Glyma01g29171	Gm01:39255360-39265417	ws82-0	ws82-7	OK	2.46288	1.48913	-0.725872	1.10168	0.2706	0.667775	no
Glyma01g29190	Glyma01g29190	Glyma01g29190	Gm01:39285279-39288819	ws82-0	ws82-7	NOTEST	0	0	0	0	1	1	no
Glyma01g29220	Glyma01g29220	Glyma01g29220	Gm01:39316166-39317298	ws82-0	ws82-7	NOTEST	0	0	0	0	1	1	no
Glyma01g29230	Glyma01g29230	Glyma01g29230	Gm01:39317900-39318629	ws82-0	ws82-7	NOTEST	0	0	0	0	1	1	no
Glyma01g29255	Glyma01g29255	Glyma01g29255	Gm01:39318953-39319509	ws82-0	ws82-7	NOTEST	0	0	0	0	1	1	no
Glyma01g29280	Glyma01g29280	Glyma01g29280	Gm01:39350672-39358098	ws82-0	ws82-7	OK	2.83419	2.23479	-0.342798	0.594573	0.552129	0.85339	no
Glyma01g29305	Glyma01g29305	Glyma01g29305	Gm01:39376341-39388072	ws82-0	ws82-7	OK	5.87358	1.85718	-1.66112	2.72545	0.00642149	0.0913022	no
Glyma01g29330	Glyma01g29330	Glyma01g29330	Gm01:39403861-39412277	ws82-0	ws82-7	OK	12.0035	7.67136	-0.645905	1.35625	0.175021	0.563806	no
Glyma01g29346	Glyma01g29346	Glyma01g29346	Gm01:39421332-39429591	ws82-0	ws82-7	OK	3.71908	2.33714	-0.6702	1.10193	0.270492	0.667703	no
Glyma01g29362	Glyma01g29362	Glyma01g29362	Gm01:39443729-39458833	ws82-0	ws82-7	OK	10.6039	8.18179	-0.374111	0.745391	0.456035	0.80286	no
Glyma01g29378	Glyma01g29378	Glyma01g29378	Gm01:39478263-39516299	ws82-0	ws82-7	OK	5.91291	4.6376	-0.35049	0.702803	0.482178	0.817489	no
Glyma01g29394	Glyma01g29394	Glyma01g29394	Gm01:39526777-39530894	ws82-0	ws82-7	OK	0.726595	1.31671	0.857714	-1.3338	0.18227	0.572694	no
Glyma01g29410	Glyma01g29410	Glyma01g29410	Gm01:39591646-39594997	ws82-0	ws82-7	OK	1.3709	0.699205	-0.97134	1.39829	0.162025	0.545576	no
Glyma01g29420	Glyma01g29420	Glyma01g29420	Gm01:39597740-39602942	ws82-0	ws82-7	OK	6.95922	8.9897	0.369346	-0.76784	0.442582	0.794177	no
Glyma01g29440	Glyma01g29440	Glyma01g29440	Gm01:39655886-39656000	ws82-0	ws82-7	NOTEST	0	0	0	0	1	1	no
Glyma01g29470	Glyma01g29470	Glyma01g29470	Gm01:39787035-39797571	ws82-0	ws82-7	OK	11.0812	3.68342	-1.589	3.09614	0.0019606	0.0416666	yes
Glyma01g29480	Glyma01g29480	Glyma01g29480	Gm01:39799515-39801235	ws82-0	ws82-7	NOTEST	0	0	0	0	1	1	no
Glyma01g29495	Glyma01g29495	Glyma01g29495	Gm01:39818462-39819244	ws82-0	ws82-7	NOTEST	0	0	0	0	1	1	no
Glyma01g29511	Glyma01g29511	Glyma01g29511	Gm01:39824538-39825839	ws82-0	ws82-7	NOTEST	0	0	0	0	1	1	no
Glyma01g29525	Glyma01g29525	Glyma01g29525	Gm01:39837032-39837374	ws82-0	ws82-7	NOTEST	0	0	0	0	1	1	no
Glyma01g29540	Glyma01g29540	Glyma01g29540	Gm01:39848379-39851083	ws82-0	ws82-7	OK	20.155	17.5328	-0.201081	0.425643	0.670368	0.900234	no
Glyma01g29570	Glyma01g29570	Glyma01g29570	Gm01:39879227-39883100	ws82-0	ws82-7	NOTEST	0.125238	0.0163784	-2.93481	2.0345	0.0419013	1	no
Glyma01g29580	Glyma01g29580	Glyma01g29580	Gm01:39898856-39902291	ws82-0	ws82-7	NOTEST	0.0163669	0	-1.79769e+308	-1.79769e+308	0.157156	1	no
Glyma01g29600	Glyma01g29600	Glyma01g29600	Gm01:39918097-39921140	ws82-0	ws82-7	NOTEST	0	0	0	0	1	1	no
Glyma01g29615	Glyma01g29615	Glyma01g29615	Gm01:39935345-39939812	ws82-0	ws82-7	NOTEST	0.00854633	0	-1.79769e+308	-1.79769e+308	0.217869	1	no
Glyma01g29630	Glyma01g29630	Glyma01g29630	Gm01:39945735-39949387	ws82-0	ws82-7	OK	16.4931	33.7093	1.03128	-2.02543	0.042823	0.284395	no
Glyma01g29643	Glyma01g29643	Glyma01g29643	Gm01:39958765-39959672	ws82-0	ws82-7	NOTEST	0	0	0	0	1	1	no
Glyma01g29656	Glyma01g29656	Glyma01g29656	Gm01:39965927-39966511	ws82-0	ws82-7	NOTEST	0	0	0	0	1	1	no
Glyma01g29670	Glyma01g29670	Glyma01g29670	Gm01:39988960-39991138	ws82-0	ws82-7	OK	0.568714	0.441834	-0.364198	0.472822	0.636341	0.887333	no
Glyma01g29715	Glyma01g29715	Glyma01g29715	Gm01:40029815-40030406	ws82-0	ws82-7	NOTEST	0	0.140871	1.79769e+308	1.79769e+308	0.183103	1	no
Glyma01g29760	Glyma01g29760	Glyma01g29760	Gm01:40077200-40079998	ws82-0	ws82-7	NOTEST	0.0691086	0.269963	1.96582	-1.54725	0.121803	1	no
Glyma01g29816	Glyma01g29816	Glyma01g29816	Gm01:40154962-40155672	ws82-0	ws82-7	NOTEST	0.0535065	0	-1.79769e+308	-1.79769e+308	0.262262	1	no
Glyma01g29873	Glyma01g29873	Glyma01g29873	Gm01:40234344-40236298	ws82-0	ws82-7	NOTEST	0	0	0	0	1	1	no
Glyma01g29930	Glyma01g29930	Glyma01g29930	Gm01:40499102-40503250	ws82-0	ws82-7	OK	41.9339	7.07491	-2.56733	5.08703	3.63714e-07	4.96042e-05	yes
Glyma01g29950	Glyma01g29950	Glyma01g29950	Gm01:40560867-40564466	ws82-0	ws82-7	OK	18.286	6.66165	-1.45679	3.00558	0.00265078	0.0520416	no
Glyma01g29970	Glyma01g29970	Glyma01g29970	Gm01:40574051-40575558	ws82-0	ws82-7	NOTEST	0	0	0	0	1	1	no
Glyma01g30000	Glyma01g30000	Glyma01g30000	Gm01:40668497-40669995	ws82-0	ws82-7	NOTEST	0	0	0	0	1	1	no
Glyma01g30010	Glyma01g30010	Glyma01g30010	Gm01:40681967-40683465	ws82-0	ws82-7	NOTEST	0	0	0	0	1	1	no
Glyma01g30020	Glyma01g30020	Glyma01g30020	Gm01:40733504-40735002	ws82-0	ws82-7	NOTEST	0	0	0	0	1	1	no
Glyma01g30030	Glyma01g30030	Glyma01g30030	Gm01:40745198-40746696	ws82-0	ws82-7	NOTEST	0	0	0	0	1	1	no
Glyma01g30040	Glyma01g30040	Glyma01g30040	Gm01:40756924-40758421	ws82-0	ws82-7	NOTEST	0	0	0	0	1	1	no
Glyma01g30060	Glyma01g30060	Glyma01g30060	Gm01:40769686-40771162	ws82-0	ws82-7	NOTEST	0	0	0	0	1	1	no
Glyma01g30080	Glyma01g30080	Glyma01g30080	Gm01:40777029-40778052	ws82-0	ws82-7	NOTEST	0	0	0	0	1	1	no
Glyma01g30300	Glyma01g30300	Glyma01g30300	Gm01:40952282-40957143	ws82-0	ws82-7	OK	2.52553	2.3412	-0.109339	0.193598	0.84649	0.961673	no
Glyma01g30320	Glyma01g30320	Glyma01g30320	Gm01:40964890-40985483	ws82-0	ws82-7	OK	6.65012	7.76796	0.224155	-0.460449	0.645194	0.890497	no
Glyma01g30335	Glyma01g30335	Glyma01g30335	Gm01:40964890-40985483	ws82-0	ws82-7	OK	0.575195	0.994933	0.790549	-0.369982	0.711396	0.917344	no
Glyma01g30350	Glyma01g30350	Glyma01g30350	Gm01:41014087-41016040	ws82-0	ws82-7	OK	60.2954	75.5723	0.325809	-0.671831	0.501691	0.827637	no
Glyma01g30370	Glyma01g30370	Glyma01g30370	Gm01:41043490-41043758	ws82-0	ws82-7	NOTEST	0	0	0	0	1	1	no
Glyma01g30390	Glyma01g30390	Glyma01g30390	Gm01:41062775-41066889	ws82-0	ws82-7	OK	7.74418	3.25422	-1.2508	2.38327	0.0171595	0.167503	no
Glyma01g30400	Glyma01g30400	Glyma01g30400	Gm01:41067190-41075707	ws82-0	ws82-7	OK	10.3192	8.29555	-0.314925	0.66234	0.507753	0.83157	no
Glyma01g30431	Glyma01g30431	Glyma01g30431	Gm01:41163921-41165539	ws82-0	ws82-7	NOTEST	0	0	0	0	1	1	no
Glyma01g30460	Glyma01g30460	Glyma01g30460	Gm01:41170972-41176563	ws82-0	ws82-7	OK	0.405389	0.590526	0.542693	-0.210428	0.833333	0.958254	no
Glyma01g30485	Glyma01g30485	Glyma01g30485	Gm01:41170972-41176563	ws82-0	ws82-7	OK	1.4379	2.19622	0.611061	-1.00836	0.313283	0.705629	no
Glyma01g30511	Glyma01g30511	Glyma01g30511	Gm01:41210645-41210897	ws82-0	ws82-7	NOTEST	0	0	0	0	1	1	no
Glyma01g30535	Glyma01g30535	Glyma01g30535	Gm01:41215563-41218988	ws82-0	ws82-7	NOTEST	0	0	0	0	1	1	no
Glyma01g30560	Glyma01g30560	Glyma01g30560	Gm01:41232630-41234794	ws82-0	ws82-7	NOTEST	0	0	0	0	1	1	no
Glyma01g30610	Glyma01g30610	Glyma01g30610	Gm01:41406971-41411553	ws82-0	ws82-7	NOTEST	0	0	0	0	1	1	no
Glyma01g30626	Glyma01g30626	Glyma01g30626	Gm01:41440314-41440973	ws82-0	ws82-7	NOTEST	0	0	0	0	1	1	no
Glyma01g30643	Glyma01g30643	Glyma01g30643	Gm01:41457347-41461938	ws82-0	ws82-7	NOTEST	0	0	0	0	1	1	no
Glyma01g30660	Glyma01g30660	Glyma01g30660	Gm01:41493462-41493999	ws82-0	ws82-7	NOTEST	0	0	0	0	1	1	no
Glyma01g30670	Glyma01g30670	Glyma01g30670	Gm01:41495108-41496829	ws82-0	ws82-7	NOTEST	0.209666	0.247796	0.241064	-0.246226	0.805507	1	no
Glyma01g30900	Glyma01g30900	Glyma01g30900	Gm01:41673575-41673782	ws82-0	ws82-7	NOTEST	0	0	0	0	1	1	no
Glyma01g30910	Glyma01g30910	Glyma01g30910	Gm01:41681659-41690953	ws82-0	ws82-7	OK	12.1909	11.1121	-0.133674	0.277833	0.781141	0.942279	no
Glyma01g30920	Glyma01g30920	Glyma01g30920	Gm01:41691541-41699290	ws82-0	ws82-7	NOTEST	0.162812	0.174147	0.0970949	-0.11072	0.911838	1	no
Glyma01g30982	Glyma01g30982	Glyma01g30982	Gm01:41712879-41714252	ws82-0	ws82-7	OK	3.25751	3.15824	-0.0446492	0.0729993	0.941807	0.987096	no
Glyma01g31044	Glyma01g31044	Glyma01g31044	Gm01:41890431-41892644	ws82-0	ws82-7	OK	1.35534	1.61314	0.25122	-0.378176	0.7053	0.915048	no
Glyma01g31107	Glyma01g31107	Glyma01g31107	Gm01:41928201-41933073	ws82-0	ws82-7	NOTEST	0	0	0	0	1	1	no
Glyma01g31170	Glyma01g31170	Glyma01g31170	Gm01:41986790-41991338	ws82-0	ws82-7	OK	2.30639	2.25366	-0.0333624	0.0650979	0.948096	0.988345	no
Glyma01g31180	Glyma01g31180	Glyma01g31180	Gm01:41992765-41993572	ws82-0	ws82-7	OK	1.64614	1.09983	-0.58181	0.758516	0.448142	0.79855	no
Glyma01g31230	Glyma01g31230	Glyma01g31230	Gm01:42040491-42046500	ws82-0	ws82-7	NOTEST	0	0	0	0	1	1	no
Glyma01g31260	Glyma01g31260	Glyma01g31260	Gm01:42062020-42069161	ws82-0	ws82-7	OK	3.08727	3.07219	-0.00706383	0.0140493	0.988791	0.99771	no
Glyma01g31270	Glyma01g31270	Glyma01g31270	Gm01:42071523-42074445	ws82-0	ws82-7	OK	6.0826	8.95084	0.557335	-1.09706	0.272617	0.669182	no
Glyma01g31275	Glyma01g31275	Glyma01g31275	Gm01:42077853-42078844	ws82-0	ws82-7	NOTEST	0	0	0	0	1	1	no
Glyma01g31280	Glyma01g31280	Glyma01g31280	Gm01:42077853-42078844	ws82-0	ws82-7	NOTEST	0	0	0	0	1	1	no
Glyma01g31300	Glyma01g31300	Glyma01g31300	Gm01:42124055-42127597	ws82-0	ws82-7	OK	3.78852	3.0481	-0.313722	0.527831	0.597616	0.874166	no
Glyma01g31311	Glyma01g31311	Glyma01g31311	Gm01:42143417-42149831	ws82-0	ws82-7	OK	12.9253	9.88616	-0.386717	0.774811	0.438451	0.791852	no
Glyma01g31320	Glyma01g31320	Glyma01g31320	Gm01:42162374-42164312	ws82-0	ws82-7	OK	6.92069	12.9452	0.903427	-1.87622	0.0606253	0.341478	no
Glyma01g31341	Glyma01g31341	Glyma01g31341	Gm01:42226588-42230852	ws82-0	ws82-7	NOTEST	0	0.0455117	1.79769e+308	1.79769e+308	0.100645	1	no
Glyma01g31360	Glyma01g31360	Glyma01g31360	Gm01:42232501-42236451	ws82-0	ws82-7	OK	20.5004	14.1396	-0.535911	1.05611	0.290916	0.686181	no
Glyma01g31370	Glyma01g31370	Glyma01g31370	Gm01:42261741-42265856	ws82-0	ws82-7	NOTEST	0.10732	0.156151	0.541028	-0.567023	0.570698	1	no
Glyma01g31425	Glyma01g31425	Glyma01g31425	Gm01:42373253-42374275	ws82-0	ws82-7	OK	1.09162	0.656044	-0.734601	0.738877	0.459982	0.805059	no
Glyma01g31480	Glyma01g31480	Glyma01g31480	Gm01:42378220-42384123	ws82-0	ws82-7	OK	0.567836	0.485809	-0.225084	0.335679	0.737113	0.926725	no
Glyma01g31520	Glyma01g31520	Glyma01g31520	Gm01:42469464-42474210	ws82-0	ws82-7	NOTEST	0	0	0	0	1	1	no
Glyma01g31550	Glyma01g31550	Glyma01g31550	Gm01:42548413-42558287	ws82-0	ws82-7	NOTEST	0.01626	0	-1.79769e+308	-1.79769e+308	0.241742	1	no
Glyma01g31570	Glyma01g31570	Glyma01g31570	Gm01:42586307-42593931	ws82-0	ws82-7	OK	3.67637	4.69999	0.354377	-0.693354	0.488087	0.820023	no
Glyma01g31581	Glyma01g31581	Glyma01g31581	Gm01:42597638-42599280	ws82-0	ws82-7	NOTEST	0	0	0	0	1	1	no
Glyma01g31590	Glyma01g31590	Glyma01g31590	Gm01:42607296-42611243	ws82-0	ws82-7	NOTEST	0.268613	0.148082	-0.859131	1.08342	0.27862	1	no
Glyma01g31600	Glyma01g31600	Glyma01g31600	Gm01:42628300-42629673	ws82-0	ws82-7	OK	51.518	39.3774	-0.387709	0.80957	0.418187	0.777407	no
Glyma01g31610	Glyma01g31610	Glyma01g31610	Gm01:42631340-42634983	ws82-0	ws82-7	OK	25.5245	20.2219	-0.33596	0.710338	0.477495	0.815707	no
Glyma01g31630	Glyma01g31630	Glyma01g31630	Gm01:42661065-42664809	ws82-0	ws82-7	OK	5.36217	1.369	-1.9697	2.76211	0.00574299	0.0852193	no
Glyma01g31636	Glyma01g31636	Glyma01g31636	Gm01:42667422-42670895	ws82-0	ws82-7	NOTEST	0	0	0	0	1	1	no
Glyma01g31643	Glyma01g31643	Glyma01g31643	Gm01:42681129-42683618	ws82-0	ws82-7	NOTEST	0	0	0	0	1	1	no
Glyma01g31650	Glyma01g31650	Glyma01g31650	Gm01:42697267-42701819	ws82-0	ws82-7	NOTEST	0	0	0	0	1	1	no
Glyma01g31660	Glyma01g31660	Glyma01g31660	Gm01:42724418-42726114	ws82-0	ws82-7	NOTEST	0.166813	0.0754409	-1.14481	0.842681	0.399407	1	no
Glyma01g31670	Glyma01g31670	Glyma01g31670	Gm01:42752424-42753269	ws82-0	ws82-7	NOTEST	0	0	0	0	1	1	no
Glyma01g31691	Glyma01g31691	Glyma01g31691	Gm01:42756407-42766923	ws82-0	ws82-7	NOTEST	0	0	0	0	1	1	no
Glyma01g31711	Glyma01g31711	Glyma01g31711	Gm01:42786261-42789612	ws82-0	ws82-7	NOTEST	0	0	0	0	1	1	no
Glyma01g31730	Glyma01g31730	Glyma01g31730	Gm01:42867418-42868294	ws82-0	ws82-7	NOTEST	0.0756361	0	-1.79769e+308	-1.79769e+308	0.232747	1	no
Glyma01g31750	Glyma01g31750	Glyma01g31750	Gm01:42942064-42943179	ws82-0	ws82-7	OK	39.3049	18.1341	-1.116	2.34828	0.0188601	0.178015	no
Glyma01g31760	Glyma01g31760	Glyma01g31760	Gm01:42947350-42947710	ws82-0	ws82-7	NOTEST	0	0	0	0	1	1	no
Glyma01g31780	Glyma01g31780	Glyma01g31780	Gm01:42956928-42957282	ws82-0	ws82-7	NOTEST	0	0	0	0	1	1	no
Glyma01g31801	Glyma01g31801	Glyma01g31801	Gm01:43007888-43008997	ws82-0	ws82-7	NOTEST	0	0	0	0	1	1	no
Glyma01g31820	Glyma01g31820	Glyma01g31820	Gm01:43013160-43013421	ws82-0	ws82-7	OK	20.9205	0	-1.79769e+308	-1.79769e+308	0.217869	0.613673	no
Glyma01g31830	Glyma01g31830	Glyma01g31830	Gm01:43025615-43026886	ws82-0	ws82-7	OK	12.0851	8.09889	-0.577429	1.16629	0.243497	0.639993	no
Glyma01g31840	Glyma01g31840	Glyma01g31840	Gm01:43069330-43072880	ws82-0	ws82-7	OK	0.762443	0.696838	-0.129806	0.198527	0.842633	0.960676	no
Glyma01g31850	Glyma01g31850	Glyma01g31850	Gm01:43076459-43079732	ws82-0	ws82-7	NOTEST	0.0567017	0.0346624	-0.710022	0.343916	0.73091	1	no
Glyma01g31860	Glyma01g31860	Glyma01g31860	Gm01:43090292-43094391	ws82-0	ws82-7	NOTEST	0	0	0	0	1	1	no
Glyma01g31890	Glyma01g31890	Glyma01g31890	Gm01:43130697-43137550	ws82-0	ws82-7	OK	0.698954	0.545049	-0.358811	0.433537	0.664625	0.898	no
Glyma01g31900	Glyma01g31900	Glyma01g31900	Gm01:43140964-43144007	ws82-0	ws82-7	OK	1.31708	0.796828	-0.725004	1.07518	0.282293	0.677757	no
Glyma01g31910	Glyma01g31910	Glyma01g31910	Gm01:43154205-43156585	ws82-0	ws82-7	NOTEST	0	0	0	0	1	1	no
Glyma01g31921	Glyma01g31921	Glyma01g31921	Gm01:43157131-43160950	ws82-0	ws82-7	OK	0.406091	0.248177	-0.710436	0.794197	0.427081	0.783617	no
Glyma01g31930	Glyma01g31930	Glyma01g31930	Gm01:43173872-43179341	ws82-0	ws82-7	OK	2.56972	2.38167	-0.109639	0.214257	0.830346	0.957669	no
Glyma01g31940	Glyma01g31940	Glyma01g31940	Gm01:43217711-43224924	ws82-0	ws82-7	NOTEST	0.22707	0.281287	0.308904	-0.341643	0.73262	1	no
Glyma01g31961	Glyma01g31961	Glyma01g31961	Gm01:43241123-43245445	ws82-0	ws82-7	NOTEST	0	0	0	0	1	1	no
Glyma01g31980	Glyma01g31980	Glyma01g31980	Gm01:43250905-43255641	ws82-0	ws82-7	NOTEST	0.104515	0.200868	0.942533	-0.190393	0.849001	1	no
Glyma01g31990	Glyma01g31990	Glyma01g31990	Gm01:43250905-43255641	ws82-0	ws82-7	OK	4.94086	9.39341	0.926885	-1.72678	0.0842079	0.405104	no
Glyma01g32000	Glyma01g32000	Glyma01g32000	Gm01:43264508-43272659	ws82-0	ws82-7	OK	7.27261	5.93878	-0.292308	0.615931	0.53794	0.845135	no
Glyma01g32010	Glyma01g32010	Glyma01g32010	Gm01:43337913-43338530	ws82-0	ws82-7	NOTEST	0	0	0	0	1	1	no
Glyma01g32020	Glyma01g32020	Glyma01g32020	Gm01:43341907-43343025	ws82-0	ws82-7	NOTEST	0	0	0	0	1	1	no
Glyma01g32031	Glyma01g32031	Glyma01g32031	Gm01:43354010-43355755	ws82-0	ws82-7	NOTEST	0	0	0	0	1	1	no
Glyma01g32040	Glyma01g32040	Glyma01g32040	Gm01:43398690-43400994	ws82-0	ws82-7	NOTEST	0.342293	0.0992803	-1.78565	1.35158	0.17651	1	no
Glyma01g32070	Glyma01g32070	Glyma01g32070	Gm01:43424973-43427243	ws82-0	ws82-7	OK	2.267	0.432801	-2.38901	3.03464	0.00240823	0.0485989	yes
Glyma01g32081	Glyma01g32081	Glyma01g32081	Gm01:43450179-43450730	ws82-0	ws82-7	NOTEST	0	0	0	0	1	1	no
Glyma01g32090	Glyma01g32090	Glyma01g32090	Gm01:43463846-43470841	ws82-0	ws82-7	OK	22.0462	3.11724	-2.82219	5.59083	2.25988e-08	5.21624e-06	yes
Glyma01g32103	Glyma01g32103	Glyma01g32103	Gm01:43463846-43470841	ws82-0	ws82-7	OK	0.990095	0.578637	-0.77491	0.194865	0.845499	0.961565	no
Glyma01g32116	Glyma01g32116	Glyma01g32116	Gm01:43502972-43506823	ws82-0	ws82-7	NOTEST	0.0341824	0.082871	1.27761	-0.833353	0.404646	1	no
Glyma01g32130	Glyma01g32130	Glyma01g32130	Gm01:43553617-43555903	ws82-0	ws82-7	NOTEST	0.0646221	0.153928	1.25215	-0.637269	0.52395	1	no
Glyma01g32140	Glyma01g32140	Glyma01g32140	Gm01:43570735-43574743	ws82-0	ws82-7	OK	3.74424	1.02954	-1.86267	2.68506	0.00725176	0.0986631	no
Glyma01g32160	Glyma01g32160	Glyma01g32160	Gm01:43604977-43607065	ws82-0	ws82-7	NOTEST	0	0	0	0	1	1	no
Glyma01g32190	Glyma01g32190	Glyma01g32190	Gm01:43621003-43623360	ws82-0	ws82-7	NOTEST	0	0	0	0	1	1	no
Glyma01g32211	Glyma01g32211	Glyma01g32211	Gm01:43638172-43638537	ws82-0	ws82-7	NOTEST	0	0	0	0	1	1	no
Glyma01g32230	Glyma01g32230	Glyma01g32230	Gm01:43687454-43687922	ws82-0	ws82-7	NOTEST	0.161556	0	-1.79769e+308	-1.79769e+308	0.217869	1	no
Glyma01g32270	Glyma01g32270	Glyma01g32270	Gm01:43720350-43722510	ws82-0	ws82-7	NOTEST	0	0	0	0	1	1	no
Glyma01g32291	Glyma01g32291	Glyma01g32291	Gm01:43773470-43774094	ws82-0	ws82-7	NOTEST	0	0.234543	1.79769e+308	1.79769e+308	0.134216	1	no
Glyma01g32310	Glyma01g32310	Glyma01g32310	Gm01:43784204-43786716	ws82-0	ws82-7	NOTEST	0	0	0	0	1	1	no
Glyma01g32340	Glyma01g32340	Glyma01g32340	Gm01:43819827-43820154	ws82-0	ws82-7	NOTEST	0	0	0	0	1	1	no
Glyma01g32360	Glyma01g32360	Glyma01g32360	Gm01:43828911-43832736	ws82-0	ws82-7	NOTEST	0.0690851	0.0221175	-1.64319	0.890397	0.373253	1	no
Glyma01g32370	Glyma01g32370	Glyma01g32370	Gm01:43834206-43835697	ws82-0	ws82-7	OK	10.3835	2.45363	-2.0813	3.76004	0.000169888	0.00712275	yes
Glyma01g32380	Glyma01g32380	Glyma01g32380	Gm01:43870379-43873398	ws82-0	ws82-7	OK	1.802	1.34735	-0.419478	0.734629	0.462566	0.806644	no
Glyma01g32390	Glyma01g32390	Glyma01g32390	Gm01:43912452-43917776	ws82-0	ws82-7	NOTEST	0.0662109	0	-1.79769e+308	-1.79769e+308	0.242828	1	no
Glyma01g32400	Glyma01g32400	Glyma01g32400	Gm01:43922908-43926832	ws82-0	ws82-7	OK	5.60247	4.1949	-0.417426	0.855475	0.392288	0.761128	no
Glyma01g32415	Glyma01g32415	Glyma01g32415	Gm01:43929164-43930175	ws82-0	ws82-7	NOTEST	0	0	0	0	1	1	no
Glyma01g32430	Glyma01g32430	Glyma01g32430	Gm01:43974483-43977133	ws82-0	ws82-7	OK	0.750375	0.330122	-1.18461	1.76573	0.0774415	0.388235	no
Glyma01g32440	Glyma01g32440	Glyma01g32440	Gm01:43989758-43991730	ws82-0	ws82-7	OK	0.298904	1.79559	2.5867	-3.67001	0.000242541	0.00939577	yes
Glyma01g32450	Glyma01g32450	Glyma01g32450	Gm01:44035709-44042969	ws82-0	ws82-7	OK	35.5619	37.043	0.0588683	-0.119544	0.904844	0.978251	no
Glyma01g32460	Glyma01g32460	Glyma01g32460	Gm01:44035709-44042969	ws82-0	ws82-7	LOWDATA	0	0	0.0588683	0	1	1	no
Glyma01g32480	Glyma01g32480	Glyma01g32480	Gm01:44085644-44091881	ws82-0	ws82-7	NOTEST	0	0	0	0	1	1	no
Glyma01g32680	Glyma01g32680	Glyma01g32680	Gm01:44207946-44213690	ws82-0	ws82-7	OK	6.71381	2.22825	-1.59122	2.70785	0.00677206	0.0945359	no
Glyma01g32690	Glyma01g32690	Glyma01g32690	Gm01:44229408-44236211	ws82-0	ws82-7	OK	10.3993	6.63459	-0.648401	1.36825	0.171233	0.558023	no
Glyma01g32750	Glyma01g32750	Glyma01g32750	Gm01:44319318-44320867	ws82-0	ws82-7	OK	6031.92	2632.09	-1.19641	1.65278	0.0983752	0.43714	no
Glyma01g32760	Glyma01g32760	Glyma01g32760	Gm01:44347887-44349526	ws82-0	ws82-7	NOTEST	0	0.315741	1.79769e+308	1.79769e+308	0.0201655	1	no
Glyma01g32775	Glyma01g32775	Glyma01g32775	Gm01:44353224-44356977	ws82-0	ws82-7	NOTEST	0.0297806	0.0193212	-0.624193	0.302342	0.762391	1	no
Glyma01g32790	Glyma01g32790	Glyma01g32790	Gm01:44365503-44368345	ws82-0	ws82-7	OK	3.12222	4.09264	0.390463	-0.738302	0.460331	0.80533	no
Glyma01g32800	Glyma01g32800	Glyma01g32800	Gm01:44381434-44383734	ws82-0	ws82-7	NOTEST	0.0459404	0.117436	1.35404	-0.883202	0.377127	1	no
Glyma01g32810	Glyma01g32810	Glyma01g32810	Gm01:44384412-44392444	ws82-0	ws82-7	OK	0.968161	0.685474	-0.498145	0.779951	0.43542	0.789897	no
Glyma01g32825	Glyma01g32825	Glyma01g32825	Gm01:44418267-44430426	ws82-0	ws82-7	NOTEST	0	0	0	0	1	1	no
Glyma01g32841	Glyma01g32841	Glyma01g32841	Gm01:44482207-44482737	ws82-0	ws82-7	NOTEST	0	0.317601	1.79769e+308	1.79769e+308	0.0353652	1	no
Glyma01g32855	Glyma01g32855	Glyma01g32855	Gm01:44489898-44494310	ws82-0	ws82-7	NOTEST	0.0832774	0.171459	1.04187	-1.14522	0.25212	1	no
Glyma01g32870	Glyma01g32870	Glyma01g32870	Gm01:44497093-44498739	ws82-0	ws82-7	OK	33.5685	26.2601	-0.354236	0.7378	0.460636	0.80561	no
Glyma01g32881	Glyma01g32881	Glyma01g32881	Gm01:44501342-44502103	ws82-0	ws82-7	OK	0.832556	1.37849	0.72747	-0.881747	0.377914	0.751622	no
Glyma01g32890	Glyma01g32890	Glyma01g32890	Gm01:44504750-44507253	ws82-0	ws82-7	OK	1.53495	2.13766	0.477842	-0.641468	0.521219	0.837209	no
Glyma01g32900	Glyma01g32900	Glyma01g32900	Gm01:44534734-44540055	ws82-0	ws82-7	NOTEST	0	0	0	0	1	1	no
Glyma01g32920	Glyma01g32920	Glyma01g32920	Gm01:44562541-44564228	ws82-0	ws82-7	NOTEST	0	0.162509	1.79769e+308	1.79769e+308	0.0353652	1	no
Glyma01g32940	Glyma01g32940	Glyma01g32940	Gm01:44595567-44597755	ws82-0	ws82-7	NOTEST	0	0	0	0	1	1	no
Glyma01g32961	Glyma01g32961	Glyma01g32961	Gm01:44638341-44639787	ws82-0	ws82-7	NOTEST	0	0	0	0	1	1	no
Glyma01g32981	Glyma01g32981	Glyma01g32981	Gm01:44662613-44664324	ws82-0	ws82-7	NOTEST	0.244603	0.0207611	-3.55848	2.08339	0.0372158	1	no
Glyma01g33000	Glyma01g33000	Glyma01g33000	Gm01:44707383-44712370	ws82-0	ws82-7	NOTEST	0	0	0	0	1	1	no
Glyma01g33017	Glyma01g33017	Glyma01g33017	Gm01:44713495-44722187	ws82-0	ws82-7	OK	5.56641	5.2954	-0.0720063	0.141106	0.887787	0.973288	no
Glyma01g33034	Glyma01g33034	Glyma01g33034	Gm01:44713495-44722187	ws82-0	ws82-7	OK	0.554883	1.10579	0.994824	-0.60119	0.547713	0.850338	no
Glyma01g33052	Glyma01g33052	Glyma01g33052	Gm01:44724345-44725089	ws82-0	ws82-7	NOTEST	0	0	0	0	1	1	no
Glyma01g33070	Glyma01g33070	Glyma01g33070	Gm01:44755155-44764276	ws82-0	ws82-7	OK	0.655825	0.0825162	-2.99056	2.58073	0.00985924	0.119338	no
Glyma01g33080	Glyma01g33080	Glyma01g33080	Gm01:44784821-44785786	ws82-0	ws82-7	OK	12.0143	1.37957	-3.12246	1.79676	0.072373	0.374901	no
Glyma01g33097	Glyma01g33097	Glyma01g33097	Gm01:44790872-44791190	ws82-0	ws82-7	OK	2.71712	0.44601	-2.60693	1.49368	0.135258	0.501273	no
Glyma01g33114	Glyma01g33114	Glyma01g33114	Gm01:44806144-44806480	ws82-0	ws82-7	NOTEST	0	0	0	0	1	1	no
Glyma01g33132	Glyma01g33132	Glyma01g33132	Gm01:44822529-44827918	ws82-0	ws82-7	NOTEST	0	0	0	0	1	1	no
Glyma01g33150	Glyma01g33150	Glyma01g33150	Gm01:44831611-44835997	ws82-0	ws82-7	NOTEST	0.260323	0.0758812	-1.77849	1.78863	0.0736752	1	no
Glyma01g33160	Glyma01g33160	Glyma01g33160	Gm01:44884977-44888493	ws82-0	ws82-7	NOTEST	0	0	0	0	1	1	no
Glyma01g33170	Glyma01g33170	Glyma01g33170	Gm01:44905880-44910333	ws82-0	ws82-7	NOTEST	0	0	0	0	1	1	no
Glyma01g33181	Glyma01g33181	Glyma01g33181	Gm01:44911452-44912574	ws82-0	ws82-7	NOTEST	0	0	0	0	1	1	no
Glyma01g33191	Glyma01g33191	Glyma01g33191	Gm01:44940045-44941190	ws82-0	ws82-7	NOTEST	0	0	0	0	1	1	no
Glyma01g33200	Glyma01g33200	Glyma01g33200	Gm01:44962980-44967133	ws82-0	ws82-7	OK	14.886	10.18	-0.548212	1.1425	0.253244	0.650157	no
Glyma01g33220	Glyma01g33220	Glyma01g33220	Gm01:44980052-44984577	ws82-0	ws82-7	OK	11.1288	6.59633	-0.754567	1.52508	0.12724	0.49057	no
Glyma01g33240	Glyma01g33240	Glyma01g33240	Gm01:45046813-45053379	ws82-0	ws82-7	OK	4.78756	6.61037	0.46544	-0.968749	0.33267	0.721351	no
Glyma01g33270	Glyma01g33270	Glyma01g33270	Gm01:45164206-45167759	ws82-0	ws82-7	OK	6.09854	4.89298	-0.317749	0.663363	0.507098	0.831192	no
Glyma01g33281	Glyma01g33281	Glyma01g33281	Gm01:45184472-45185139	ws82-0	ws82-7	NOTEST	0	0	0	0	1	1	no
Glyma01g33290	Glyma01g33290	Glyma01g33290	Gm01:45230344-45235073	ws82-0	ws82-7	OK	3.47951	2.17659	-0.676813	1.31738	0.187713	0.578972	no
Glyma01g33300	Glyma01g33300	Glyma01g33300	Gm01:45287112-45288519	ws82-0	ws82-7	NOTEST	0	0	0	0	1	1	no
Glyma01g33313	Glyma01g33313	Glyma01g33313	Gm01:45306250-45306442	ws82-0	ws82-7	NOTEST	0	0	0	0	1	1	no
Glyma01g33326	Glyma01g33326	Glyma01g33326	Gm01:45317460-45320741	ws82-0	ws82-7	NOTEST	0	0	0	0	1	1	no
Glyma01g33340	Glyma01g33340	Glyma01g33340	Gm01:45339891-45344677	ws82-0	ws82-7	NOTEST	0.0427258	0.111819	1.38798	-0.905342	0.365284	1	no
Glyma01g33350	Glyma01g33350	Glyma01g33350	Gm01:45352146-45354813	ws82-0	ws82-7	NOTEST	0	0.0944713	1.79769e+308	1.79769e+308	0.100645	1	no
Glyma01g33370	Glyma01g33370	Glyma01g33370	Gm01:45401644-45404974	ws82-0	ws82-7	OK	0.322539	0.817518	1.34178	-1.63527	0.101992	0.443542	no
Glyma01g33380	Glyma01g33380	Glyma01g33380	Gm01:45433046-45455133	ws82-0	ws82-7	OK	2.75266	2.11021	-0.383441	0.532266	0.594542	0.872777	no
Glyma01g33420	Glyma01g33420	Glyma01g33420	Gm01:45530801-45532165	ws82-0	ws82-7	OK	0.640007	0.963519	0.590226	-0.799204	0.424172	0.781295	no
Glyma01g33430	Glyma01g33430	Glyma01g33430	Gm01:45548731-45551079	ws82-0	ws82-7	NOTEST	0	0	0	0	1	1	no
Glyma01g33440	Glyma01g33440	Glyma01g33440	Gm01:45561036-45565329	ws82-0	ws82-7	OK	0.4885	0.597702	0.291068	-0.397698	0.690853	0.908514	no
Glyma01g33461	Glyma01g33461	Glyma01g33461	Gm01:45637083-45640786	ws82-0	ws82-7	NOTEST	0	0.0173685	1.79769e+308	1.79769e+308	0.183103	1	no
Glyma01g33480	Glyma01g33480	Glyma01g33480	Gm01:45640951-45643255	ws82-0	ws82-7	NOTEST	0	0	0	0	1	1	no
Glyma01g33500	Glyma01g33500	Glyma01g33500	Gm01:45666010-45668198	ws82-0	ws82-7	NOTEST	0	0	0	0	1	1	no
Glyma01g33510	Glyma01g33510	Glyma01g33510	Gm01:45669204-45672362	ws82-0	ws82-7	NOTEST	0	0.0242688	1.79769e+308	1.79769e+308	0.183103	1	no
Glyma01g33520	Glyma01g33520	Glyma01g33520	Gm01:45685075-45692774	ws82-0	ws82-7	OK	7.68426	7.15755	-0.10244	0.196234	0.844427	0.961088	no
Glyma01g33560	Glyma01g33560	Glyma01g33560	Gm01:45743456-45744317	ws82-0	ws82-7	NOTEST	0	0	0	0	1	1	no
Glyma01g33575	Glyma01g33575	Glyma01g33575	Gm01:45782142-45782607	ws82-0	ws82-7	NOTEST	0	0	0	0	1	1	no
Glyma01g33590	Glyma01g33590	Glyma01g33590	Gm01:45785878-45786501	ws82-0	ws82-7	NOTEST	0	0	0	0	1	1	no
Glyma01g33600	Glyma01g33600	Glyma01g33600	Gm01:45786844-45790318	ws82-0	ws82-7	OK	6.40689	5.23528	-0.291358	0.528394	0.597226	0.874012	no
Glyma01g33610	Glyma01g33610	Glyma01g33610	Gm01:45796676-45800002	ws82-0	ws82-7	OK	4.8516	6.17715	0.34848	-0.688439	0.491176	0.821204	no
Glyma01g33620	Glyma01g33620	Glyma01g33620	Gm01:45803536-45806513	ws82-0	ws82-7	OK	1.25027	1.78888	0.516818	-0.786443	0.431608	0.786722	no
Glyma01g33635	Glyma01g33635	Glyma01g33635	Gm01:45827324-45830713	ws82-0	ws82-7	NOTEST	0	0	0	0	1	1	no
Glyma01g33650	Glyma01g33650	Glyma01g33650	Gm01:45852397-45854700	ws82-0	ws82-7	OK	2.62883	2.98121	0.181473	-0.349921	0.726398	0.922937	no
Glyma01g33660	Glyma01g33660	Glyma01g33660	Gm01:45858147-45867014	ws82-0	ws82-7	OK	10.108	7.44095	-0.441937	0.930507	0.352109	0.736133	no
Glyma01g33676	Glyma01g33676	Glyma01g33676	Gm01:45892351-45898318	ws82-0	ws82-7	OK	0.656998	0.843176	0.359944	-0.541041	0.588479	0.869985	no
Glyma01g33692	Glyma01g33692	Glyma01g33692	Gm01:45905544-45906417	ws82-0	ws82-7	NOTEST	0	0	0	0	1	1	no
Glyma01g33708	Glyma01g33708	Glyma01g33708	Gm01:45911622-45912362	ws82-0	ws82-7	OK	0	7.34625	1.79769e+308	1.79769e+308	0.0353652	0.256541	no
Glyma01g33724	Glyma01g33724	Glyma01g33724	Gm01:45932771-45933893	ws82-0	ws82-7	OK	2.45288	2.4091	-0.025981	0.0436398	0.965192	0.991837	no
Glyma01g33740	Glyma01g33740	Glyma01g33740	Gm01:45948913-45964890	ws82-0	ws82-7	NOTEST	0	0	0	0	1	1	no
Glyma01g33761	Glyma01g33761	Glyma01g33761	Gm01:45948913-45964890	ws82-0	ws82-7	OK	3.43614	3.6906	0.103067	-0.186215	0.852276	0.963634	no
Glyma01g33782	Glyma01g33782	Glyma01g33782	Gm01:45948913-45964890	ws82-0	ws82-7	NOTEST	0	0	0	0	1	1	no
Glyma01g33803	Glyma01g33803	Glyma01g33803	Gm01:45990835-45994797	ws82-0	ws82-7	NOTEST	0.0256488	0	-1.79769e+308	-1.79769e+308	0.217869	1	no
Glyma01g33824	Glyma01g33824	Glyma01g33824	Gm01:46002247-46005198	ws82-0	ws82-7	NOTEST	0	0	0	0	1	1	no
Glyma01g33845	Glyma01g33845	Glyma01g33845	Gm01:46007636-46011913	ws82-0	ws82-7	NOTEST	0	0	0	0	1	1	no
Glyma01g33866	Glyma01g33866	Glyma01g33866	Gm01:46043835-46074615	ws82-0	ws82-7	OK	5.15296	5.84962	0.182941	-0.3782	0.705282	0.915048	no
Glyma01g33888	Glyma01g33888	Glyma01g33888	Gm01:46096266-46097858	ws82-0	ws82-7	NOTEST	0	0	0	0	1	1	no
Glyma01g33910	Glyma01g33910	Glyma01g33910	Gm01:46103382-46104985	ws82-0	ws82-7	OK	0.0495757	0.456168	3.20186	-2.23655	0.025316	0.212596	no
Glyma01g33920	Glyma01g33920	Glyma01g33920	Gm01:46115248-46117119	ws82-0	ws82-7	NOTEST	0	0	0	0	1	1	no
Glyma01g33960	Glyma01g33960	Glyma01g33960	Gm01:46237540-46239330	ws82-0	ws82-7	NOTEST	0	0	0	0	1	1	no
Glyma01g33986	Glyma01g33986	Glyma01g33986	Gm01:46305207-46307924	ws82-0	ws82-7	NOTEST	0	0	0	0	1	1	no
Glyma01g34013	Glyma01g34013	Glyma01g34013	Gm01:46321601-46322033	ws82-0	ws82-7	NOTEST	0	0	0	0	1	1	no
Glyma01g34040	Glyma01g34040	Glyma01g34040	Gm01:46325425-46325842	ws82-0	ws82-7	NOTEST	0	0	0	0	1	1	no
Glyma01g34060	Glyma01g34060	Glyma01g34060	Gm01:46360579-46360996	ws82-0	ws82-7	NOTEST	0	0	0	0	1	1	no
Glyma01g34111	Glyma01g34111	Glyma01g34111	Gm01:46405622-46406054	ws82-0	ws82-7	NOTEST	0	0	0	0	1	1	no
Glyma01g34160	Glyma01g34160	Glyma01g34160	Gm01:46426795-46427518	ws82-0	ws82-7	NOTEST	0	0	0	0	1	1	no
Glyma01g34180	Glyma01g34180	Glyma01g34180	Gm01:46434724-46435093	ws82-0	ws82-7	NOTEST	0	0	0	0	1	1	no
Glyma01g34210	Glyma01g34210	Glyma01g34210	Gm01:46467747-46468471	ws82-0	ws82-7	NOTEST	0	0	0	0	1	1	no
Glyma01g34223	Glyma01g34223	Glyma01g34223	Gm01:46519589-46520799	ws82-0	ws82-7	NOTEST	0	0	0	0	1	1	no
Glyma01g34236	Glyma01g34236	Glyma01g34236	Gm01:46527137-46531737	ws82-0	ws82-7	OK	1.65945	0.519113	-1.67658	2.31675	0.0205171	0.187709	no
Glyma01g34250	Glyma01g34250	Glyma01g34250	Gm01:46534521-46534953	ws82-0	ws82-7	NOTEST	0	0	0	0	1	1	no
Glyma01g34260	Glyma01g34260	Glyma01g34260	Gm01:46537220-46537655	ws82-0	ws82-7	NOTEST	0	0	0	0	1	1	no
Glyma01g34270	Glyma01g34270	Glyma01g34270	Gm01:46573515-46583536	ws82-0	ws82-7	OK	7.76879	4.12521	-0.913223	1.78043	0.075006	0.382546	no
Glyma01g34300	Glyma01g34300	Glyma01g34300	Gm01:46676161-46677711	ws82-0	ws82-7	OK	491.706	68.0785	-2.85252	5.29765	1.17302e-07	1.98922e-05	yes
Glyma01g34321	Glyma01g34321	Glyma01g34321	Gm01:46693841-46694273	ws82-0	ws82-7	NOTEST	0	0	0	0	1	1	no
Glyma01g34340	Glyma01g34340	Glyma01g34340	Gm01:46707889-46726051	ws82-0	ws82-7	NOTEST	0	0	0	0	1	1	no
Glyma01g34350	Glyma01g34350	Glyma01g34350	Gm01:46731685-46740931	ws82-0	ws82-7	OK	4.01835	3.85337	-0.0604842	0.112866	0.910137	0.980157	no
Glyma01g34360	Glyma01g34360	Glyma01g34360	Gm01:46742637-46747004	ws82-0	ws82-7	OK	1.31155	0.487193	-1.42871	1.56585	0.117385	0.475056	no
Glyma01g34370	Glyma01g34370	Glyma01g34370	Gm01:46749398-46751642	ws82-0	ws82-7	NOTEST	0.107484	0.258725	1.2673	-0.826626	0.408449	1	no
Glyma01g34380	Glyma01g34380	Glyma01g34380	Gm01:46754477-46758976	ws82-0	ws82-7	OK	3.61477	2.56107	-0.497156	0.825789	0.408924	0.772469	no
Glyma01g34400	Glyma01g34400	Glyma01g34400	Gm01:46763231-46763483	ws82-0	ws82-7	OK	4.64719	0	-1.79769e+308	-1.79769e+308	0.0281209	0.225496	no
Glyma01g34410	Glyma01g34410	Glyma01g34410	Gm01:46764767-46772182	ws82-0	ws82-7	OK	4.47263	3.09483	-0.531263	0.931862	0.351408	0.735846	no
Glyma01g34420	Glyma01g34420	Glyma01g34420	Gm01:46787052-46789561	ws82-0	ws82-7	NOTEST	0	0	0	0	1	1	no
Glyma01g34443	Glyma01g34443	Glyma01g34443	Gm01:46808690-46811728	ws82-0	ws82-7	NOTEST	0	0	0	0	1	1	no
Glyma01g34466	Glyma01g34466	Glyma01g34466	Gm01:46825911-46827713	ws82-0	ws82-7	NOTEST	0	0	0	0	1	1	no
Glyma01g34490	Glyma01g34490	Glyma01g34490	Gm01:46835873-46838757	ws82-0	ws82-7	NOTEST	0	0.0359045	1.79769e+308	1.79769e+308	0.183103	1	no
Glyma01g34506	Glyma01g34506	Glyma01g34506	Gm01:46869789-46881811	ws82-0	ws82-7	OK	2.06678	1.72875	-0.257655	0.480664	0.630755	0.886306	no
Glyma01g34523	Glyma01g34523	Glyma01g34523	Gm01:46869789-46881811	ws82-0	ws82-7	NOTEST	0	0	0	0	1	1	no
Glyma01g34540	Glyma01g34540	Glyma01g34540	Gm01:46906412-46911701	ws82-0	ws82-7	NOTEST	0.0766959	0.127535	0.733674	-0.620993	0.534604	1	no
Glyma01g34560	Glyma01g34560	Glyma01g34560	Gm01:46925228-46938022	ws82-0	ws82-7	OK	2.21096	1.1305	-0.967716	1.71086	0.0871073	0.412843	no
Glyma01g34570	Glyma01g34570	Glyma01g34570	Gm01:46940993-46942519	ws82-0	ws82-7	NOTEST	0.251987	0.119243	-1.07945	1.08921	0.27606	1	no
Glyma01g34580	Glyma01g34580	Glyma01g34580	Gm01:46987337-46989392	ws82-0	ws82-7	NOTEST	0	0	0	0	1	1	no
Glyma01g34590	Glyma01g34590	Glyma01g34590	Gm01:46994947-47011742	ws82-0	ws82-7	NOTEST	0.0756981	0.0475785	-0.669947	0.673847	0.500408	1	no
Glyma01g34605	Glyma01g34605	Glyma01g34605	Gm01:47017352-47017572	ws82-0	ws82-7	NOTEST	0	0	0	0	1	1	no
Glyma01g34620	Glyma01g34620	Glyma01g34620	Gm01:47044532-47046263	ws82-0	ws82-7	OK	0.133764	0.482968	1.85224	-1.66554	0.0958043	0.432459	no
Glyma01g34630	Glyma01g34630	Glyma01g34630	Gm01:47059946-47069275	ws82-0	ws82-7	OK	11.1259	8.81164	-0.336444	0.671704	0.501772	0.827646	no
Glyma01g34650	Glyma01g34650	Glyma01g34650	Gm01:47081810-47085604	ws82-0	ws82-7	NOTEST	0.153308	0.222178	0.535284	-0.500917	0.616429	1	no
Glyma01g34660	Glyma01g34660	Glyma01g34660	Gm01:47090148-47094163	ws82-0	ws82-7	OK	11.652	11.5122	-0.0174137	0.0338018	0.973035	0.994143	no
Glyma01g34671	Glyma01g34671	Glyma01g34671	Gm01:47112164-47117514	ws82-0	ws82-7	NOTEST	0	0	0	0	1	1	no
Glyma01g34680	Glyma01g34680	Glyma01g34680	Gm01:47129774-47133165	ws82-0	ws82-7	OK	16.9866	11.1128	-0.612172	1.20804	0.22703	0.623082	no
Glyma01g34690	Glyma01g34690	Glyma01g34690	Gm01:47136977-47141477	ws82-0	ws82-7	OK	5.44893	6.10516	0.164055	-0.241596	0.809093	0.951455	no
Glyma01g34700	Glyma01g34700	Glyma01g34700	Gm01:47141945-47148729	ws82-0	ws82-7	OK	40.6595	78.8583	0.955669	-1.8008	0.071735	0.373603	no
Glyma01g34710	Glyma01g34710	Glyma01g34710	Gm01:47159471-47160816	ws82-0	ws82-7	NOTEST	0	0	0	0	1	1	no
Glyma01g34723	Glyma01g34723	Glyma01g34723	Gm01:47186498-47195065	ws82-0	ws82-7	NOTEST	0.199923	0.0423823	-2.23791	0.770437	0.441041	1	no
Glyma01g34736	Glyma01g34736	Glyma01g34736	Gm01:47186498-47195065	ws82-0	ws82-7	OK	1.08319	0.46596	-1.21701	1.51047	0.130924	0.496045	no
Glyma01g34750	Glyma01g34750	Glyma01g34750	Gm01:47186498-47195065	ws82-0	ws82-7	NOTEST	0	0	0	0	1	1	no
Glyma01g34760	Glyma01g34760	Glyma01g34760	Gm01:47218316-47222203	ws82-0	ws82-7	NOTEST	0	0	0	0	1	1	no
Glyma01g34770	Glyma01g34770	Glyma01g34770	Gm01:47223841-47226695	ws82-0	ws82-7	NOTEST	0	0	0	0	1	1	no
Glyma01g34780	Glyma01g34780	Glyma01g34780	Gm01:47252139-47259720	ws82-0	ws82-7	OK	10.7758	9.52514	-0.177989	0.345804	0.72949	0.924074	no
Glyma01g34791	Glyma01g34791	Glyma01g34791	Gm01:47272202-47272649	ws82-0	ws82-7	NOTEST	0	0	0	0	1	1	no
Glyma01g34800	Glyma01g34800	Glyma01g34800	Gm01:47276056-47279637	ws82-0	ws82-7	OK	0.224829	0.472877	1.07263	-1.2218	0.221782	0.617887	no
Glyma01g34820	Glyma01g34820	Glyma01g34820	Gm01:47295116-47298579	ws82-0	ws82-7	OK	9.38577	8.80954	-0.091408	0.193306	0.84672	0.961673	no
Glyma01g34830	Glyma01g34830	Glyma01g34830	Gm01:47301280-47303164	ws82-0	ws82-7	NOTEST	0.0298004	0.208589	2.80726	-1.94029	0.052345	1	no
Glyma01g34840	Glyma01g34840	Glyma01g34840	Gm01:47306519-47315257	ws82-0	ws82-7	OK	4.60653	4.44665	-0.0509627	0.107403	0.914469	0.980867	no
Glyma01g34890	Glyma01g34890	Glyma01g34890	Gm01:47380345-47383987	ws82-0	ws82-7	NOTEST	0	0	0	0	1	1	no
Glyma01g34930	Glyma01g34930	Glyma01g34930	Gm01:47416768-47417287	ws82-0	ws82-7	NOTEST	0.0664253	0.179519	1.43433	-0.661551	0.508259	1	no
Glyma01g34940	Glyma01g34940	Glyma01g34940	Gm01:47418176-47422790	ws82-0	ws82-7	OK	3.88248	4.12571	0.087663	-0.162508	0.870906	0.968258	no
Glyma01g34950	Glyma01g34950	Glyma01g34950	Gm01:47484620-47488243	ws82-0	ws82-7	OK	0	0.43608	1.79769e+308	1.79769e+308	0.205272	0.599399	no
Glyma01g34960	Glyma01g34960	Glyma01g34960	Gm01:47484620-47488243	ws82-0	ws82-7	OK	1.33377	0.639898	-1.05959	1.44563	0.148281	0.522826	no
Glyma01g34971	Glyma01g34971	Glyma01g34971	Gm01:47509796-47513893	ws82-0	ws82-7	NOTEST	0	0	0	0	1	1	no
Glyma01g34980	Glyma01g34980	Glyma01g34980	Gm01:47515002-47518685	ws82-0	ws82-7	OK	0.3343	0.779092	1.22065	-1.76668	0.0772812	0.387724	no
Glyma01g34990	Glyma01g34990	Glyma01g34990	Gm01:47519487-47522901	ws82-0	ws82-7	OK	0.272116	0.634335	1.22102	-1.56889	0.116673	0.474081	no
Glyma01g35010	Glyma01g35010	Glyma01g35010	Gm01:47557393-47559050	ws82-0	ws82-7	OK	0.604609	1.00291	0.730116	-1.02462	0.305542	0.698748	no
Glyma01g35030	Glyma01g35030	Glyma01g35030	Gm01:47605850-47609703	ws82-0	ws82-7	OK	29.2738	22.1608	-0.4016	0.847688	0.396612	0.76418	no
Glyma01g35043	Glyma01g35043	Glyma01g35043	Gm01:47610784-47630469	ws82-0	ws82-7	OK	4.37274	3.12481	-0.484768	0.906139	0.364862	0.744747	no
Glyma01g35056	Glyma01g35056	Glyma01g35056	Gm01:47635648-47638176	ws82-0	ws82-7	OK	0.642239	0.4381	-0.551849	0.746475	0.455381	0.802244	no
Glyma01g35070	Glyma01g35070	Glyma01g35070	Gm01:47640057-47641838	ws82-0	ws82-7	NOTEST	0	0	0	0	1	1	no
Glyma01g35083	Glyma01g35083	Glyma01g35083	Gm01:47647068-47659579	ws82-0	ws82-7	OK	2.41606	3.77518	0.643889	-1.20994	0.226304	0.622621	no
Glyma01g35096	Glyma01g35096	Glyma01g35096	Gm01:47647068-47659579	ws82-0	ws82-7	OK	0.315278	0.373587	0.244822	-0.149334	0.88129	0.971861	no
Glyma01g35110	Glyma01g35110	Glyma01g35110	Gm01:47674344-47678727	ws82-0	ws82-7	OK	4.43813	1.91141	-1.21531	2.04569	0.0407868	0.278144	no
Glyma01g35120	Glyma01g35120	Glyma01g35120	Gm01:47680344-47682544	ws82-0	ws82-7	NOTEST	0	0	0	0	1	1	no
Glyma01g35130	Glyma01g35130	Glyma01g35130	Gm01:47684337-47693236	ws82-0	ws82-7	OK	26.0033	19.2399	-0.434593	0.883077	0.377195	0.751244	no
Glyma01g35145	Glyma01g35145	Glyma01g35145	Gm01:47696213-47700220	ws82-0	ws82-7	OK	1.99865	3.5634	0.83423	-1.4851	0.137518	0.505134	no
Glyma01g35160	Glyma01g35160	Glyma01g35160	Gm01:47703725-47705225	ws82-0	ws82-7	NOTEST	0.261678	0.148474	-0.817584	0.836991	0.402598	1	no
Glyma01g35170	Glyma01g35170	Glyma01g35170	Gm01:47707392-47708756	ws82-0	ws82-7	OK	11.0979	30.7776	1.4716	-3.04986	0.00228946	0.0470944	yes
Glyma01g35180	Glyma01g35180	Glyma01g35180	Gm01:47718336-47725678	ws82-0	ws82-7	NOTEST	0.0939832	0.231974	1.30349	-1.17976	0.238095	1	no
Glyma01g35190	Glyma01g35190	Glyma01g35190	Gm01:47727548-47732948	ws82-0	ws82-7	OK	40.8573	30.0087	-0.445213	0.922697	0.356165	0.737814	no
Glyma01g35201	Glyma01g35201	Glyma01g35201	Gm01:47733363-47734311	ws82-0	ws82-7	OK	2.59717	2.2761	-0.190374	0.191136	0.848419	0.962251	no
Glyma01g35211	Glyma01g35211	Glyma01g35211	Gm01:47738908-47740460	ws82-0	ws82-7	NOTEST	0	0	0	0	1	1	no
Glyma01g35220	Glyma01g35220	Glyma01g35220	Gm01:47744055-47749293	ws82-0	ws82-7	OK	22.3466	25.3124	0.179792	-0.338048	0.735327	0.926103	no
Glyma01g35230	Glyma01g35230	Glyma01g35230	Gm01:47776150-47780905	ws82-0	ws82-7	OK	13.9415	8.59428	-0.697938	1.44455	0.148583	0.523415	no
Glyma01g35255	Glyma01g35255	Glyma01g35255	Gm01:47796276-47802389	ws82-0	ws82-7	NOTEST	0.0427663	0.0949823	1.15119	-1.00269	0.31601	1	no
Glyma01g35280	Glyma01g35280	Glyma01g35280	Gm01:47816224-47821828	ws82-0	ws82-7	OK	24.744	24.1402	-0.0356421	0.0754516	0.939855	0.986475	no
Glyma01g35291	Glyma01g35291	Glyma01g35291	Gm01:47825541-47831516	ws82-0	ws82-7	OK	0.885604	0.554564	-0.675307	0.907164	0.36432	0.744364	no
Glyma01g35300	Glyma01g35300	Glyma01g35300	Gm01:47832148-47834125	ws82-0	ws82-7	OK	5.0819	4.81638	-0.0774212	0.147072	0.883075	0.972219	no
Glyma01g35310	Glyma01g35310	Glyma01g35310	Gm01:47838176-47839418	ws82-0	ws82-7	NOTEST	0.0812779	0.0877754	0.110954	-0.0849409	0.932308	1	no
Glyma01g35315	Glyma01g35315	Glyma01g35315	Gm01:47840273-47842107	ws82-0	ws82-7	NOTEST	0	0	0	0	1	1	no
Glyma01g35320	Glyma01g35320	Glyma01g35320	Gm01:47843480-47846444	ws82-0	ws82-7	OK	15.0484	12.4605	-0.272248	0.576274	0.56443	0.85821	no
Glyma01g35330	Glyma01g35330	Glyma01g35330	Gm01:47852135-47854503	ws82-0	ws82-7	OK	5.23144	9.72653	0.894718	-1.86498	0.0621835	0.346227	no
Glyma01g35360	Glyma01g35360	Glyma01g35360	Gm01:47868564-47871498	ws82-0	ws82-7	OK	21.9085	22.9777	0.068746	-0.145462	0.884346	0.972358	no
Glyma01g35370	Glyma01g35370	Glyma01g35370	Gm01:47876579-47879048	ws82-0	ws82-7	OK	3.54082	4.18041	0.239561	-0.468323	0.639554	0.888324	no
Glyma01g35381	Glyma01g35381	Glyma01g35381	Gm01:47882778-47885490	ws82-0	ws82-7	OK	17.0293	11.1251	-0.614192	1.20034	0.230008	0.625409	no
Glyma01g35390	Glyma01g35390	Glyma01g35390	Gm01:47891482-47901268	ws82-0	ws82-7	OK	12.0252	14.5437	0.274329	-0.579738	0.562091	0.857284	no
Glyma01g35400	Glyma01g35400	Glyma01g35400	Gm01:47904409-47909019	ws82-0	ws82-7	OK	2.04605	1.31972	-0.632611	1.03476	0.30078	0.694115	no
Glyma01g35410	Glyma01g35410	Glyma01g35410	Gm01:47910023-47911708	ws82-0	ws82-7	NOTEST	0.0644398	0.0893989	0.472304	-0.386429	0.699179	1	no
Glyma01g35420	Glyma01g35420	Glyma01g35420	Gm01:47912898-47913228	ws82-0	ws82-7	NOTEST	0	0	0	0	1	1	no
Glyma01g35430	Glyma01g35430	Glyma01g35430	Gm01:47926149-47931104	ws82-0	ws82-7	NOTEST	0.0300144	0.101013	1.75082	-1.16659	0.243375	1	no
Glyma01g35440	Glyma01g35440	Glyma01g35440	Gm01:47932186-47933647	ws82-0	ws82-7	NOTEST	0	0	0	0	1	1	no
Glyma01g35450	Glyma01g35450	Glyma01g35450	Gm01:47933912-47939040	ws82-0	ws82-7	OK	10.3035	14.2969	0.47257	-0.998404	0.318083	0.709894	no
Glyma01g35460	Glyma01g35460	Glyma01g35460	Gm01:47946562-47947368	ws82-0	ws82-7	OK	18.0711	25.7124	0.508781	-1.0509	0.293306	0.687698	no
Glyma01g35470	Glyma01g35470	Glyma01g35470	Gm01:47950106-47953985	ws82-0	ws82-7	OK	1.19723	1.79484	0.584157	-0.827487	0.407961	0.771847	no
Glyma01g35480	Glyma01g35480	Glyma01g35480	Gm01:47964085-47972060	ws82-0	ws82-7	OK	9.26142	6.8984	-0.424972	0.726755	0.467376	0.809982	no
Glyma01g35490	Glyma01g35490	Glyma01g35490	Gm01:47975124-47980649	ws82-0	ws82-7	OK	3.59238	5.51168	0.617549	-1.26722	0.205077	0.599278	no
Glyma01g35500	Glyma01g35500	Glyma01g35500	Gm01:47984869-47990016	ws82-0	ws82-7	OK	0.776528	0.538217	-0.528849	0.755568	0.449908	0.79934	no
Glyma01g35510	Glyma01g35510	Glyma01g35510	Gm01:47990548-47991258	ws82-0	ws82-7	OK	1.53229	1.53577	0.00327329	-0.00408787	0.996738	0.999257	no
Glyma01g35530	Glyma01g35530	Glyma01g35530	Gm01:48002890-48006714	ws82-0	ws82-7	OK	0.619592	0.737466	0.251257	-0.344843	0.730213	0.924356	no
Glyma01g35540	Glyma01g35540	Glyma01g35540	Gm01:48012025-48020478	ws82-0	ws82-7	OK	2.10682	1.43846	-0.550541	0.831899	0.405466	0.771077	no
Glyma01g35551	Glyma01g35551	Glyma01g35551	Gm01:48045791-48046532	ws82-0	ws82-7	OK	0.531464	0.163347	-1.70203	1.27878	0.200975	0.594803	no
Glyma01g35561	Glyma01g35561	Glyma01g35561	Gm01:48046627-48048949	ws82-0	ws82-7	NOTEST	0.032273	0	-1.79769e+308	-1.79769e+308	0.135176	1	no
Glyma01g35570	Glyma01g35570	Glyma01g35570	Gm01:48069521-48070621	ws82-0	ws82-7	OK	3.6305	2.02142	-0.844801	1.25582	0.209182	0.6048	no
Glyma01g35580	Glyma01g35580	Glyma01g35580	Gm01:48077865-48083725	ws82-0	ws82-7	OK	2.0363	0.93834	-1.11777	1.34631	0.178202	0.567465	no
Glyma01g35590	Glyma01g35590	Glyma01g35590	Gm01:48086193-48086883	ws82-0	ws82-7	NOTEST	0.255926	0.128549	-0.993404	0.731233	0.464637	1	no
Glyma01g35600	Glyma01g35600	Glyma01g35600	Gm01:48088646-48092573	ws82-0	ws82-7	OK	4.41563	3.23717	-0.447883	0.786069	0.431827	0.786722	no
Glyma01g35611	Glyma01g35611	Glyma01g35611	Gm01:48106435-48107149	ws82-0	ws82-7	NOTEST	0	0	0	0	1	1	no
Glyma01g35620	Glyma01g35620	Glyma01g35620	Gm01:48132072-48139955	ws82-0	ws82-7	OK	41.917	12.228	-1.77735	3.66736	0.000245066	0.00946723	yes
Glyma01g35630	Glyma01g35630	Glyma01g35630	Gm01:48142117-48144321	ws82-0	ws82-7	OK	1.06878	1.44694	0.437037	-0.630815	0.528162	0.840356	no
Glyma01g35640	Glyma01g35640	Glyma01g35640	Gm01:48145384-48152470	ws82-0	ws82-7	OK	2.0633	0.579157	-1.83293	2.86977	0.00410767	0.0693753	no
Glyma01g35650	Glyma01g35650	Glyma01g35650	Gm01:48157272-48165868	ws82-0	ws82-7	OK	14.5139	2.59309	-2.48469	5.09285	3.52727e-07	4.86471e-05	yes
Glyma01g35660	Glyma01g35660	Glyma01g35660	Gm01:48174704-48177832	ws82-0	ws82-7	OK	2.40478	1.01427	-1.24546	2.05386	0.0399897	0.275416	no
Glyma01g35671	Glyma01g35671	Glyma01g35671	Gm01:48220843-48221643	ws82-0	ws82-7	OK	19.5616	31.2351	0.675149	-1.35411	0.175703	0.564634	no
Glyma01g35681	Glyma01g35681	Glyma01g35681	Gm01:48221730-48222524	ws82-0	ws82-7	NOTEST	0	0	0	0	1	1	no
Glyma01g35690	Glyma01g35690	Glyma01g35690	Gm01:48227988-48235632	ws82-0	ws82-7	OK	1.15233	0.8751	-0.397032	0.621187	0.534477	0.843299	no
Glyma01g35700	Glyma01g35700	Glyma01g35700	Gm01:48235761-48238962	ws82-0	ws82-7	NOTEST	0.0185521	0.0701922	1.91973	-1.29187	0.196402	1	no
Glyma01g35711	Glyma01g35711	Glyma01g35711	Gm01:48242478-48244212	ws82-0	ws82-7	NOTEST	0	0	0	0	1	1	no
Glyma01g35720	Glyma01g35720	Glyma01g35720	Gm01:48246126-48248948	ws82-0	ws82-7	NOTEST	0	0	0	0	1	1	no
Glyma01g35730	Glyma01g35730	Glyma01g35730	Gm01:48251598-48253821	ws82-0	ws82-7	OK	0.760619	0.853861	0.166828	-0.216115	0.828898	0.957193	no
Glyma01g35740	Glyma01g35740	Glyma01g35740	Gm01:48256233-48258418	ws82-0	ws82-7	OK	0.604365	0.470228	-0.362059	0.43862	0.660937	0.896262	no
Glyma01g35750	Glyma01g35750	Glyma01g35750	Gm01:48262136-48265375	ws82-0	ws82-7	OK	13.1436	9.83027	-0.419062	0.879156	0.379316	0.752892	no
Glyma01g35780	Glyma01g35780	Glyma01g35780	Gm01:48276784-48278711	ws82-0	ws82-7	OK	13.403	16.1387	0.267971	-0.527457	0.597876	0.874333	no
Glyma01g35790	Glyma01g35790	Glyma01g35790	Gm01:48279936-48284217	ws82-0	ws82-7	OK	9.99874	5.89324	-0.762684	1.60758	0.107927	0.457503	no
Glyma01g35800	Glyma01g35800	Glyma01g35800	Gm01:48289113-48292398	ws82-0	ws82-7	OK	1.62846	1.32062	-0.302298	0.524038	0.600252	0.875235	no
Glyma01g35820	Glyma01g35820	Glyma01g35820	Gm01:48321786-48329293	ws82-0	ws82-7	OK	1.28701	1.92322	0.579498	-1.01638	0.30945	0.701937	no
Glyma01g35830	Glyma01g35830	Glyma01g35830	Gm01:48330613-48331119	ws82-0	ws82-7	NOTEST	0	0	0	0	1	1	no
Glyma01g35840	Glyma01g35840	Glyma01g35840	Gm01:48332060-48333217	ws82-0	ws82-7	OK	5.92719	5.28864	-0.164452	0.294487	0.768386	0.937612	no
Glyma01g35850	Glyma01g35850	Glyma01g35850	Gm01:48334976-48338851	ws82-0	ws82-7	OK	4.91496	4.4757	-0.135066	0.280677	0.778958	0.941303	no
Glyma01g35880	Glyma01g35880	Glyma01g35880	Gm01:48348796-48349428	ws82-0	ws82-7	NOTEST	0	0	0	0	1	1	no
Glyma01g35910	Glyma01g35910	Glyma01g35910	Gm01:48361827-48364787	ws82-0	ws82-7	OK	738.313	284.95	-1.37352	2.14769	0.0317381	0.242508	no
Glyma01g35920	Glyma01g35920	Glyma01g35920	Gm01:48373909-48375181	ws82-0	ws82-7	OK	1.56217	2.97628	0.929958	-1.46798	0.14211	0.51286	no
Glyma01g35931	Glyma01g35931	Glyma01g35931	Gm01:48376295-48378301	ws82-0	ws82-7	NOTEST	0	0	0	0	1	1	no
Glyma01g35940	Glyma01g35940	Glyma01g35940	Gm01:48378830-48383355	ws82-0	ws82-7	OK	4.92988	3.58128	-0.461079	0.936121	0.349211	0.733789	no
Glyma01g35950	Glyma01g35950	Glyma01g35950	Gm01:48392038-48401536	ws82-0	ws82-7	OK	2.19424	2.10543	-0.0596111	0.119228	0.905095	0.978251	no
Glyma01g35960	Glyma01g35960	Glyma01g35960	Gm01:48412616-48415065	ws82-0	ws82-7	NOTEST	0	0.0823429	1.79769e+308	1.79769e+308	0.0587815	1	no
Glyma01g35970	Glyma01g35970	Glyma01g35970	Gm01:48419129-48422033	ws82-0	ws82-7	NOTEST	0	0	0	0	1	1	no
Glyma01g35980	Glyma01g35980	Glyma01g35980	Gm01:48422961-48427391	ws82-0	ws82-7	OK	1.8502	0.872426	-1.08458	1.85435	0.0636898	0.350876	no
Glyma01g35990	Glyma01g35990	Glyma01g35990	Gm01:48439916-48441659	ws82-0	ws82-7	OK	4.61486	3.18283	-0.535976	0.95465	0.339755	0.726954	no
Glyma01g36000	Glyma01g36000	Glyma01g36000	Gm01:48442886-48447854	ws82-0	ws82-7	OK	1.32505	1.18807	-0.157431	0.272816	0.784994	0.943504	no
Glyma01g36011	Glyma01g36011	Glyma01g36011	Gm01:48469240-48475758	ws82-0	ws82-7	OK	3.38155	2.90245	-0.220415	0.399262	0.6897	0.907996	no
Glyma01g36021	Glyma01g36021	Glyma01g36021	Gm01:48476497-48478317	ws82-0	ws82-7	NOTEST	0	0	0	0	1	1	no
Glyma01g36030	Glyma01g36030	Glyma01g36030	Gm01:48481465-48486456	ws82-0	ws82-7	OK	4.68847	2.53794	-0.88546	1.4565	0.145255	0.518059	no
Glyma01g36040	Glyma01g36040	Glyma01g36040	Gm01:48503695-48509106	ws82-0	ws82-7	OK	2.87459	2.55926	-0.167631	0.317145	0.751133	0.931039	no
Glyma01g36050	Glyma01g36050	Glyma01g36050	Gm01:48515192-48516090	ws82-0	ws82-7	NOTEST	0.156123	0.156245	0.00112705	-0.000862819	0.999312	1	no
Glyma01g36070	Glyma01g36070	Glyma01g36070	Gm01:48524087-48529043	ws82-0	ws82-7	OK	12.8057	6.79287	-0.914687	1.92162	0.0546532	0.325491	no
Glyma01g36080	Glyma01g36080	Glyma01g36080	Gm01:48537766-48542585	ws82-0	ws82-7	OK	4.07595	0.829555	-2.29673	3.93444	8.33913e-05	0.00413696	yes
Glyma01g36091	Glyma01g36091	Glyma01g36091	Gm01:48559460-48570512	ws82-0	ws82-7	NOTEST	0.188713	0.204782	0.117892	-0.12693	0.898996	1	no
Glyma01g36101	Glyma01g36101	Glyma01g36101	Gm01:48579414-48580534	ws82-0	ws82-7	NOTEST	0	0	0	0	1	1	no
Glyma01g36110	Glyma01g36110	Glyma01g36110	Gm01:48584816-48588333	ws82-0	ws82-7	OK	9.36784	8.35841	-0.164487	0.348229	0.727668	0.923738	no
Glyma01g36120	Glyma01g36120	Glyma01g36120	Gm01:48599418-48603933	ws82-0	ws82-7	OK	1.29172	2.72823	1.07867	-1.70185	0.0887842	0.416515	no
Glyma01g36130	Glyma01g36130	Glyma01g36130	Gm01:48622283-48624709	ws82-0	ws82-7	NOTEST	0	0	0	0	1	1	no
Glyma01g36145	Glyma01g36145	Glyma01g36145	Gm01:48632045-48636339	ws82-0	ws82-7	OK	3.09681	0.541302	-2.51627	3.95436	7.67383e-05	0.00387633	yes
Glyma01g36160	Glyma01g36160	Glyma01g36160	Gm01:48651554-48653174	ws82-0	ws82-7	OK	19.5788	12.5477	-0.641868	1.35573	0.175185	0.563842	no
Glyma01g36170	Glyma01g36170	Glyma01g36170	Gm01:48661585-48668062	ws82-0	ws82-7	OK	6.35669	3.31664	-0.938553	1.88796	0.0590319	0.338519	no
Glyma01g36180	Glyma01g36180	Glyma01g36180	Gm01:48677503-48687090	ws82-0	ws82-7	OK	2.99054	2.41784	-0.306686	0.48162	0.630076	0.885977	no
Glyma01g36190	Glyma01g36190	Glyma01g36190	Gm01:48690497-48697620	ws82-0	ws82-7	NOTEST	0	0	0	0	1	1	no
Glyma01g36200	Glyma01g36200	Glyma01g36200	Gm01:48703010-48710116	ws82-0	ws82-7	OK	6.74828	6.20923	-0.120104	0.25324	0.800083	0.948766	no
Glyma01g36210	Glyma01g36210	Glyma01g36210	Gm01:48710853-48716254	ws82-0	ws82-7	OK	32.6629	23.9479	-0.447755	0.863478	0.387875	0.758358	no
Glyma01g36225	Glyma01g36225	Glyma01g36225	Gm01:48732011-48735191	ws82-0	ws82-7	OK	0.608252	0.511902	-0.248801	0.338303	0.735135	0.926103	no
Glyma01g36240	Glyma01g36240	Glyma01g36240	Gm01:48735796-48738228	ws82-0	ws82-7	NOTEST	0.369391	0.344896	-0.0989894	0.131363	0.895488	1	no
Glyma01g36250	Glyma01g36250	Glyma01g36250	Gm01:48740116-48740919	ws82-0	ws82-7	OK	2.12327	2.11609	-0.0048909	0.00640919	0.994886	0.998778	no
Glyma01g36260	Glyma01g36260	Glyma01g36260	Gm01:48742924-48747330	ws82-0	ws82-7	OK	2.71769	1.27169	-1.09564	1.93473	0.0530234	0.319737	no
Glyma01g36270	Glyma01g36270	Glyma01g36270	Gm01:48751691-48754081	ws82-0	ws82-7	OK	6.69077	5.65478	-0.242702	0.503425	0.614666	0.880245	no
Glyma01g36280	Glyma01g36280	Glyma01g36280	Gm01:48755468-48766262	ws82-0	ws82-7	OK	3.186	3.1695	-0.00749374	0.0147933	0.988197	0.99771	no
Glyma01g36290	Glyma01g36290	Glyma01g36290	Gm01:48768219-48769858	ws82-0	ws82-7	OK	6.98564	6.71046	-0.0579813	0.0965364	0.923095	0.982466	no
Glyma01g36301	Glyma01g36301	Glyma01g36301	Gm01:48784769-48791019	ws82-0	ws82-7	OK	0.343598	0.782464	1.1873	-1.7095	0.0873577	0.413264	no
Glyma01g36311	Glyma01g36311	Glyma01g36311	Gm01:48803722-48809885	ws82-0	ws82-7	NOTEST	0	0	0	0	1	1	no
Glyma01g36320	Glyma01g36320	Glyma01g36320	Gm01:48810062-48812413	ws82-0	ws82-7	OK	4.51722	4.98731	0.142826	-0.219521	0.826244	0.956285	no
Glyma01g36330	Glyma01g36330	Glyma01g36330	Gm01:48812789-48816606	ws82-0	ws82-7	NOTEST	0	0	0	0	1	1	no
Glyma01g36340	Glyma01g36340	Glyma01g36340	Gm01:48817174-48822812	ws82-0	ws82-7	OK	7.15419	4.56238	-0.649002	1.34675	0.178062	0.567387	no
Glyma01g36350	Glyma01g36350	Glyma01g36350	Gm01:48822940-48825606	ws82-0	ws82-7	OK	0.0887066	0.406039	2.1945	-2.50706	0.0121741	0.135787	no
Glyma01g36360	Glyma01g36360	Glyma01g36360	Gm01:48830588-48836103	ws82-0	ws82-7	NOTEST	0.19164	0.245033	0.354579	-0.400989	0.688428	1	no
Glyma01g36375	Glyma01g36375	Glyma01g36375	Gm01:48848060-48848643	ws82-0	ws82-7	NOTEST	0	0	0	0	1	1	no
Glyma01g36390	Glyma01g36390	Glyma01g36390	Gm01:48865791-48875859	ws82-0	ws82-7	OK	2.16812	1.38973	-0.64164	1.13683	0.255611	0.651937	no
Glyma01g36410	Glyma01g36410	Glyma01g36410	Gm01:48903092-48909719	ws82-0	ws82-7	OK	17.0073	11.329	-0.586132	1.23684	0.216146	0.61161	no
Glyma01g36420	Glyma01g36420	Glyma01g36420	Gm01:48925196-48933027	ws82-0	ws82-7	OK	0.760859	1.82307	1.26067	-1.68774	0.0914619	0.422224	no
Glyma01g36430	Glyma01g36430	Glyma01g36430	Gm01:48939588-48943055	ws82-0	ws82-7	OK	0.761455	0.511535	-0.573924	0.793223	0.427648	0.783841	no
Glyma01g36440	Glyma01g36440	Glyma01g36440	Gm01:48945635-48947617	ws82-0	ws82-7	OK	4.62035	3.04827	-0.60001	1.17768	0.238922	0.635719	no
Glyma01g36450	Glyma01g36450	Glyma01g36450	Gm01:48961667-48971891	ws82-0	ws82-7	OK	5.15762	4.46521	-0.207977	0.438269	0.661191	0.896312	no
Glyma01g36460	Glyma01g36460	Glyma01g36460	Gm01:48974134-48978029	ws82-0	ws82-7	OK	0.495335	0.397926	-0.315903	0.404566	0.685797	0.90695	no
Glyma01g36480	Glyma01g36480	Glyma01g36480	Gm01:48987938-48990441	ws82-0	ws82-7	OK	33.2933	5.98784	-2.47512	4.89715	9.7238e-07	0.000113007	yes
Glyma01g36490	Glyma01g36490	Glyma01g36490	Gm01:48994357-48995257	ws82-0	ws82-7	NOTEST	0	0	0	0	1	1	no
Glyma01g36500	Glyma01g36500	Glyma01g36500	Gm01:48997060-49003679	ws82-0	ws82-7	NOTEST	0.252323	0.347237	0.460652	-0.608696	0.542726	1	no
Glyma01g36510	Glyma01g36510	Glyma01g36510	Gm01:49007099-49008173	ws82-0	ws82-7	NOTEST	0	0.0407687	1.79769e+308	1.79769e+308	0.183103	1	no
Glyma01g36520	Glyma01g36520	Glyma01g36520	Gm01:49010426-49011305	ws82-0	ws82-7	NOTEST	0	0	0	0	1	1	no
Glyma01g36530	Glyma01g36530	Glyma01g36530	Gm01:49013986-49014688	ws82-0	ws82-7	NOTEST	0	0	0	0	1	1	no
Glyma01g36545	Glyma01g36545	Glyma01g36545	Gm01:49022248-49027494	ws82-0	ws82-7	NOTEST	0	0	0	0	1	1	no
Glyma01g36560	Glyma01g36560	Glyma01g36560	Gm01:49029694-49030771	ws82-0	ws82-7	NOTEST	0	0	0	0	1	1	no
Glyma01g36570	Glyma01g36570	Glyma01g36570	Gm01:49038832-49039771	ws82-0	ws82-7	NOTEST	0.192755	0.127986	-0.590785	0.495644	0.620145	1	no
Glyma01g36580	Glyma01g36580	Glyma01g36580	Gm01:49043808-49044992	ws82-0	ws82-7	NOTEST	0	0	0	0	1	1	no
Glyma01g36590	Glyma01g36590	Glyma01g36590	Gm01:49051914-49056921	ws82-0	ws82-7	NOTEST	0.317719	0.139663	-1.1858	1.39611	0.162682	1	no
Glyma01g36600	Glyma01g36600	Glyma01g36600	Gm01:49064175-49066310	ws82-0	ws82-7	OK	8.53637	5.0894	-0.746126	1.44717	0.147848	0.522474	no
Glyma01g36606	Glyma01g36606	Glyma01g36606	Gm01:49068914-49070036	ws82-0	ws82-7	OK	6.52108	9.55756	0.55153	-1.0969	0.272684	0.669213	no
Glyma01g36613	Glyma01g36613	Glyma01g36613	Gm01:49070073-49072214	ws82-0	ws82-7	OK	6.29731	8.18928	0.379002	-0.739122	0.459833	0.804968	no
Glyma01g36620	Glyma01g36620	Glyma01g36620	Gm01:49074667-49077300	ws82-0	ws82-7	OK	864.258	379.227	-1.1884	2.07377	0.0381007	0.268016	no
Glyma01g36630	Glyma01g36630	Glyma01g36630	Gm01:49084944-49093758	ws82-0	ws82-7	OK	9.04933	3.29322	-1.45831	2.64912	0.00807028	0.105606	no
Glyma01g36638	Glyma01g36638	Glyma01g36638	Gm01:49107386-49109822	ws82-0	ws82-7	OK	10.9764	4.58557	-1.25924	2.32764	0.0199315	0.184638	no
Glyma01g36646	Glyma01g36646	Glyma01g36646	Gm01:49109982-49111565	ws82-0	ws82-7	OK	6.33315	2.62908	-1.26837	1.83446	0.0665859	0.358933	no
Glyma01g36654	Glyma01g36654	Glyma01g36654	Gm01:49113570-49119201	ws82-0	ws82-7	OK	3.95524	3.32578	-0.250072	0.281176	0.778575	0.941268	no
Glyma01g36662	Glyma01g36662	Glyma01g36662	Gm01:49119339-49122865	ws82-0	ws82-7	OK	20.2506	12.0967	-0.743346	1.56922	0.116596	0.473943	no
Glyma01g36670	Glyma01g36670	Glyma01g36670	Gm01:49124364-49127508	ws82-0	ws82-7	OK	17.9111	7.3606	-1.28296	2.25725	0.0239923	0.206723	no
Glyma01g36680	Glyma01g36680	Glyma01g36680	Gm01:49129327-49137766	ws82-0	ws82-7	OK	2.725	2.19761	-0.310321	0.614117	0.539138	0.845942	no
Glyma01g36691	Glyma01g36691	Glyma01g36691	Gm01:49144740-49145859	ws82-0	ws82-7	NOTEST	0	0	0	0	1	1	no
Glyma01g36700	Glyma01g36700	Glyma01g36700	Gm01:49146933-49155639	ws82-0	ws82-7	OK	14.6759	8.25522	-0.830072	1.61813	0.105634	0.452253	no
Glyma01g36711	Glyma01g36711	Glyma01g36711	Gm01:49159187-49159524	ws82-0	ws82-7	OK	0.623203	1.12433	0.851296	-0.531766	0.594888	0.872873	no
Glyma01g36720	Glyma01g36720	Glyma01g36720	Gm01:49164706-49167830	ws82-0	ws82-7	OK	0.731972	1.58387	1.11359	-1.48542	0.137431	0.505051	no
Glyma01g36730	Glyma01g36730	Glyma01g36730	Gm01:49171301-49172211	ws82-0	ws82-7	NOTEST	0.202345	0.0467295	-2.11441	1.19701	0.231301	1	no
Glyma01g36740	Glyma01g36740	Glyma01g36740	Gm01:49175886-49179312	ws82-0	ws82-7	OK	12.6804	9.87138	-0.361272	0.734807	0.462457	0.806644	no
Glyma01g36750	Glyma01g36750	Glyma01g36750	Gm01:49180569-49188788	ws82-0	ws82-7	OK	11.6293	6.58421	-0.820679	1.73365	0.0829796	0.401779	no
Glyma01g36760	Glyma01g36760	Glyma01g36760	Gm01:49196842-49199569	ws82-0	ws82-7	OK	3.90663	2.70763	-0.528896	0.752892	0.451515	0.799928	no
Glyma01g36770	Glyma01g36770	Glyma01g36770	Gm01:49207142-49211246	ws82-0	ws82-7	OK	5.77154	4.33207	-0.4139	0.727512	0.466913	0.809794	no
Glyma01g36780	Glyma01g36780	Glyma01g36780	Gm01:49213870-49215923	ws82-0	ws82-7	OK	9.78667	5.57209	-0.812601	1.50617	0.132023	0.498206	no
Glyma01g36790	Glyma01g36790	Glyma01g36790	Gm01:49215924-49218539	ws82-0	ws82-7	OK	5.37194	4.76148	-0.174033	0.265442	0.790669	0.945231	no
Glyma01g36801	Glyma01g36801	Glyma01g36801	Gm01:49220679-49225998	ws82-0	ws82-7	OK	4.59012	5.47411	0.254092	-0.529425	0.596511	0.873659	no
Glyma01g36810	Glyma01g36810	Glyma01g36810	Gm01:49235149-49235590	ws82-0	ws82-7	NOTEST	0	0	0	0	1	1	no
Glyma01g36820	Glyma01g36820	Glyma01g36820	Gm01:49253297-49254542	ws82-0	ws82-7	NOTEST	0.0718396	0.358314	2.31837	-1.58179	0.113698	1	no
Glyma01g36831	Glyma01g36831	Glyma01g36831	Gm01:49256521-49258723	ws82-0	ws82-7	OK	1.29734	1.50355	0.212821	-0.309298	0.757095	0.933152	no
Glyma01g36840	Glyma01g36840	Glyma01g36840	Gm01:49263069-49265363	ws82-0	ws82-7	OK	1.92316	3.13896	0.706812	-1.31935	0.187053	0.578188	no
Glyma01g36850	Glyma01g36850	Glyma01g36850	Gm01:49266433-49268941	ws82-0	ws82-7	OK	102.6	58.4751	-0.811133	1.66697	0.0955198	0.431801	no
Glyma01g36860	Glyma01g36860	Glyma01g36860	Gm01:49271742-49278414	ws82-0	ws82-7	OK	2.31261	4.76293	1.04233	-1.86978	0.0615149	0.344388	no
Glyma01g36870	Glyma01g36870	Glyma01g36870	Gm01:49289720-49299050	ws82-0	ws82-7	OK	8.04523	5.06055	-0.668839	1.40841	0.159011	0.540519	no
Glyma01g36880	Glyma01g36880	Glyma01g36880	Gm01:49300170-49302868	ws82-0	ws82-7	OK	15.9748	18.071	0.177884	-0.352918	0.72415	0.922173	no
Glyma01g36890	Glyma01g36890	Glyma01g36890	Gm01:49306067-49309782	ws82-0	ws82-7	OK	45.1723	36.0209	-0.326604	0.678894	0.497205	0.824656	no
Glyma01g36900	Glyma01g36900	Glyma01g36900	Gm01:49311611-49314379	ws82-0	ws82-7	OK	0.732721	0.668001	-0.133412	0.171462	0.863861	0.966591	no
Glyma01g36920	Glyma01g36920	Glyma01g36920	Gm01:49322909-49327222	ws82-0	ws82-7	NOTEST	0.0167762	0	-1.79769e+308	-1.79769e+308	0.135176	1	no
Glyma01g36931	Glyma01g36931	Glyma01g36931	Gm01:49327330-49331955	ws82-0	ws82-7	NOTEST	0.160497	0.101143	-0.666152	0.456319	0.648161	1	no
Glyma01g36940	Glyma01g36940	Glyma01g36940	Gm01:49334742-49338803	ws82-0	ws82-7	OK	0.0975732	0.725349	2.89412	-2.70083	0.00691659	0.095869	no
Glyma01g36950	Glyma01g36950	Glyma01g36950	Gm01:49340202-49347954	ws82-0	ws82-7	NOTEST	0.0893109	0.325183	1.86434	-2.34021	0.0192728	1	no
Glyma01g36960	Glyma01g36960	Glyma01g36960	Gm01:49357372-49363143	ws82-0	ws82-7	OK	7.69383	2.46318	-1.64318	3.2349	0.00121685	0.0304331	yes
Glyma01g36980	Glyma01g36980	Glyma01g36980	Gm01:49366425-49374835	ws82-0	ws82-7	NOTEST	0	0	0	0	1	1	no
Glyma01g36990	Glyma01g36990	Glyma01g36990	Gm01:49378227-49384148	ws82-0	ws82-7	OK	10.5386	9.44621	-0.157877	0.331738	0.740087	0.927565	no
Glyma01g37000	Glyma01g37000	Glyma01g37000	Gm01:49386620-49392224	ws82-0	ws82-7	NOTEST	0.0589676	0.0189056	-1.64111	0.598885	0.549249	1	no
Glyma01g37010	Glyma01g37010	Glyma01g37010	Gm01:49392804-49394717	ws82-0	ws82-7	OK	8.61949	6.55259	-0.395536	0.766961	0.443105	0.794761	no
Glyma01g37020	Glyma01g37020	Glyma01g37020	Gm01:49402192-49404630	ws82-0	ws82-7	OK	53.344	25.5865	-1.05994	2.18693	0.0287476	0.228975	no
Glyma01g37031	Glyma01g37031	Glyma01g37031	Gm01:49405105-49407262	ws82-0	ws82-7	OK	0.917616	0.36358	-1.33562	1.61479	0.106357	0.453625	no
Glyma01g37040	Glyma01g37040	Glyma01g37040	Gm01:49421021-49423263	ws82-0	ws82-7	NOTEST	0.216886	0.324828	0.582743	-0.701667	0.482887	1	no
Glyma01g37051	Glyma01g37051	Glyma01g37051	Gm01:49432478-49435070	ws82-0	ws82-7	NOTEST	0	0	0	0	1	1	no
Glyma01g37060	Glyma01g37060	Glyma01g37060	Gm01:49439171-49440019	ws82-0	ws82-7	NOTEST	0	0	0	0	1	1	no
Glyma01g37080	Glyma01g37080	Glyma01g37080	Gm01:49455121-49457778	ws82-0	ws82-7	OK	2.2738	2.20438	-0.0447334	0.0874691	0.930299	0.983951	no
Glyma01g37090	Glyma01g37090	Glyma01g37090	Gm01:49471613-49473084	ws82-0	ws82-7	OK	85.4547	27.6848	-1.62607	3.36285	0.000771423	0.0221996	yes
Glyma01g37100	Glyma01g37100	Glyma01g37100	Gm01:49482623-49488331	ws82-0	ws82-7	OK	2.12826	1.86353	-0.191633	0.331226	0.740473	0.927839	no
Glyma01g37120	Glyma01g37120	Glyma01g37120	Gm01:49513343-49516212	ws82-0	ws82-7	NOTEST	0	0	0	0	1	1	no
Glyma01g37130	Glyma01g37130	Glyma01g37130	Gm01:49518056-49520062	ws82-0	ws82-7	NOTEST	0.042841	0.0818349	0.933722	-0.583254	0.559723	1	no
Glyma01g37136	Glyma01g37136	Glyma01g37136	Gm01:49520615-49552178	ws82-0	ws82-7	OK	3.51084	3.06908	-0.194011	0.408679	0.682775	0.905379	no
Glyma01g37143	Glyma01g37143	Glyma01g37143	Gm01:49520615-49552178	ws82-0	ws82-7	NOTEST	0	0	0	0	1	1	no
Glyma01g37150	Glyma01g37150	Glyma01g37150	Gm01:49557207-49558582	ws82-0	ws82-7	NOTEST	0.138888	0.358472	1.36794	-1.41237	0.15784	1	no
Glyma01g37160	Glyma01g37160	Glyma01g37160	Gm01:49559523-49562407	ws82-0	ws82-7	OK	2.36938	3.6762	0.633704	-0.958669	0.337726	0.725427	no
Glyma01g37180	Glyma01g37180	Glyma01g37180	Gm01:49563492-49567476	ws82-0	ws82-7	OK	5.8302	8.15722	0.484532	-0.982715	0.325748	0.716038	no
Glyma01g37190	Glyma01g37190	Glyma01g37190	Gm01:49585069-49586870	ws82-0	ws82-7	NOTEST	0	0	0	0	1	1	no
Glyma01g37200	Glyma01g37200	Glyma01g37200	Gm01:49597448-49598567	ws82-0	ws82-7	NOTEST	0	0.109765	1.79769e+308	1.79769e+308	0.100645	1	no
Glyma01g37215	Glyma01g37215	Glyma01g37215	Gm01:49610632-49612072	ws82-0	ws82-7	NOTEST	0.0876472	0.0274548	-1.67465	0.81914	0.412707	1	no
Glyma01g37230	Glyma01g37230	Glyma01g37230	Gm01:49610632-49612072	ws82-0	ws82-7	NOTEST	0	0	0	0	1	1	no
Glyma01g37240	Glyma01g37240	Glyma01g37240	Gm01:49616496-49621295	ws82-0	ws82-7	NOTEST	0.245607	0.076089	-1.69059	1.8031	0.0713726	1	no
Glyma01g37250	Glyma01g37250	Glyma01g37250	Gm01:49624839-49626433	ws82-0	ws82-7	OK	46.6096	54.1066	0.215177	-0.445782	0.655755	0.894265	no
Glyma01g37270	Glyma01g37270	Glyma01g37270	Gm01:49637622-49639519	ws82-0	ws82-7	OK	52.6261	22.0697	-1.25371	2.57217	0.0101063	0.1214	no
Glyma01g37290	Glyma01g37290	Glyma01g37290	Gm01:49639992-49643961	ws82-0	ws82-7	OK	7.34161	13.0941	0.834753	-1.32007	0.186812	0.577916	no
Glyma01g37296	Glyma01g37296	Glyma01g37296	Gm01:49646115-49646903	ws82-0	ws82-7	OK	233.494	207.745	-0.168574	0.355606	0.722136	0.921504	no
Glyma01g37303	Glyma01g37303	Glyma01g37303	Gm01:49646973-49647556	ws82-0	ws82-7	OK	1.78903	2.80338	0.647985	-0.7927	0.427953	0.784082	no
Glyma01g37310	Glyma01g37310	Glyma01g37310	Gm01:49651805-49656854	ws82-0	ws82-7	OK	0.427532	0.231559	-0.88465	1.0374	0.299551	0.693013	no
Glyma01g37320	Glyma01g37320	Glyma01g37320	Gm01:49680382-49682445	ws82-0	ws82-7	OK	19.039	13.9343	-0.450321	0.942276	0.346051	0.732195	no
Glyma01g37330	Glyma01g37330	Glyma01g37330	Gm01:49688213-49691604	ws82-0	ws82-7	NOTEST	0.0839587	0.174882	1.05863	-1.1944	0.232321	1	no
Glyma01g37341	Glyma01g37341	Glyma01g37341	Gm01:49698283-49706430	ws82-0	ws82-7	OK	3.16353	2.45942	-0.363217	0.714789	0.47474	0.814639	no
Glyma01g37350	Glyma01g37350	Glyma01g37350	Gm01:49711599-49713520	ws82-0	ws82-7	NOTEST	0	0	0	0	1	1	no
Glyma01g37360	Glyma01g37360	Glyma01g37360	Gm01:49721188-49723541	ws82-0	ws82-7	OK	1.25379	9.42863	2.91075	-4.54549	5.48069e-06	0.000471936	yes
Glyma01g37370	Glyma01g37370	Glyma01g37370	Gm01:49725132-49728656	ws82-0	ws82-7	OK	22.0423	35.6997	0.695636	-1.46227	0.143667	0.515768	no
Glyma01g37380	Glyma01g37380	Glyma01g37380	Gm01:49736248-49744811	ws82-0	ws82-7	OK	9.26675	5.00125	-0.889775	1.79959	0.0719252	0.374065	no
Glyma01g37393	Glyma01g37393	Glyma01g37393	Gm01:49755262-49762118	ws82-0	ws82-7	OK	6.52271	4.69191	-0.475294	1.00563	0.314596	0.706782	no
Glyma01g37406	Glyma01g37406	Glyma01g37406	Gm01:49766181-49770448	ws82-0	ws82-7	OK	7.21739	3.833	-0.913002	1.7838	0.0744568	0.381031	no
Glyma01g37420	Glyma01g37420	Glyma01g37420	Gm01:49772165-49778547	ws82-0	ws82-7	OK	3.56219	2.38157	-0.580847	1.15395	0.248522	0.645544	no
Glyma01g37430	Glyma01g37430	Glyma01g37430	Gm01:49781351-49784822	ws82-0	ws82-7	OK	0.227137	0.557127	1.29445	-1.72507	0.0845149	0.405823	no
Glyma01g37440	Glyma01g37440	Glyma01g37440	Gm01:49804689-49806831	ws82-0	ws82-7	NOTEST	0	0	0	0	1	1	no
Glyma01g37450	Glyma01g37450	Glyma01g37450	Gm01:49804689-49806831	ws82-0	ws82-7	OK	1.9261	3.26031	0.759324	-1.3726	0.169876	0.555852	no
Glyma01g37460	Glyma01g37460	Glyma01g37460	Gm01:49816977-49818918	ws82-0	ws82-7	OK	3.88197	6.75195	0.798514	-1.61567	0.106166	0.453218	no
Glyma01g37470	Glyma01g37470	Glyma01g37470	Gm01:49821773-49824393	ws82-0	ws82-7	NOTEST	0	0	0	0	1	1	no
Glyma01g37480	Glyma01g37480	Glyma01g37480	Gm01:49830529-49834966	ws82-0	ws82-7	OK	30.5802	19.1713	-0.673649	1.4208	0.155375	0.534943	no
Glyma01g37490	Glyma01g37490	Glyma01g37490	Gm01:49841544-49848877	ws82-0	ws82-7	OK	4.73202	4.17403	-0.181016	0.334053	0.738339	0.927068	no
Glyma01g37500	Glyma01g37500	Glyma01g37500	Gm01:49850120-49854265	ws82-0	ws82-7	OK	6.29501	8.97185	0.511197	-1.07633	0.281782	0.677164	no
Glyma01g37510	Glyma01g37510	Glyma01g37510	Gm01:49858452-49865847	ws82-0	ws82-7	NOTEST	0.0266468	0.0342467	0.362003	-0.209433	0.83411	1	no
Glyma01g37520	Glyma01g37520	Glyma01g37520	Gm01:49869523-49871376	ws82-0	ws82-7	OK	1.04566	1.31843	0.334403	-0.515325	0.606326	0.877165	no
Glyma01g37530	Glyma01g37530	Glyma01g37530	Gm01:49872196-49872388	ws82-0	ws82-7	NOTEST	0	0	0	0	1	1	no
Glyma01g37541	Glyma01g37541	Glyma01g37541	Gm01:49879281-49885195	ws82-0	ws82-7	OK	5.24842	47.6253	3.18178	-6.46502	1.01287e-10	4.8791e-08	yes
Glyma01g37550	Glyma01g37550	Glyma01g37550	Gm01:49885628-49888995	ws82-0	ws82-7	OK	115.659	66.6008	-0.796267	1.63914	0.101183	0.441762	no
Glyma01g37560	Glyma01g37560	Glyma01g37560	Gm01:49891280-49893312	ws82-0	ws82-7	OK	7.97709	4.70806	-0.760731	1.30174	0.193004	0.585349	no
Glyma01g37571	Glyma01g37571	Glyma01g37571	Gm01:49893933-49905366	ws82-0	ws82-7	NOTEST	0	0	0	0	1	1	no
Glyma01g37580	Glyma01g37580	Glyma01g37580	Gm01:49893933-49905366	ws82-0	ws82-7	OK	14.7593	11.3274	-0.381803	0.775186	0.43823	0.791624	no
Glyma01g37590	Glyma01g37590	Glyma01g37590	Gm01:49909450-49916251	ws82-0	ws82-7	OK	0.694502	0.661813	-0.0695566	0.101459	0.919186	0.981373	no
Glyma01g37600	Glyma01g37600	Glyma01g37600	Gm01:49942124-49946080	ws82-0	ws82-7	NOTEST	0	0	0	0	1	1	no
Glyma01g37610	Glyma01g37610	Glyma01g37610	Gm01:49946274-49947782	ws82-0	ws82-7	OK	8.17606	5.95907	-0.456319	0.782366	0.434	0.788566	no
Glyma01g37620	Glyma01g37620	Glyma01g37620	Gm01:49949013-49952809	ws82-0	ws82-7	OK	0.704796	1.49086	1.08087	-1.81932	0.0688632	0.36546	no
Glyma01g37630	Glyma01g37630	Glyma01g37630	Gm01:49953469-49956749	ws82-0	ws82-7	NOTEST	0.179692	0.258164	0.522765	-0.574023	0.565953	1	no
Glyma01g37640	Glyma01g37640	Glyma01g37640	Gm01:49963812-49969112	ws82-0	ws82-7	NOTEST	0.0236223	0.0152417	-0.632131	0.306187	0.759462	1	no
Glyma01g37650	Glyma01g37650	Glyma01g37650	Gm01:49975720-49977560	ws82-0	ws82-7	NOTEST	0	0.0198767	1.79769e+308	1.79769e+308	0.183103	1	no
Glyma01g37670	Glyma01g37670	Glyma01g37670	Gm01:49982520-49986256	ws82-0	ws82-7	OK	3.90629	2.06728	-0.918068	1.74908	0.080278	0.395289	no
Glyma01g37675	Glyma01g37675	Glyma01g37675	Gm01:49992409-49993063	ws82-0	ws82-7	NOTEST	0	0	0	0	1	1	no
Glyma01g37680	Glyma01g37680	Glyma01g37680	Gm01:49999698-50001148	ws82-0	ws82-7	NOTEST	0	0.0438445	1.79769e+308	1.79769e+308	0.183103	1	no
Glyma01g37690	Glyma01g37690	Glyma01g37690	Gm01:50011031-50012116	ws82-0	ws82-7	NOTEST	0.160173	0.148335	-0.110769	0.100769	0.919734	1	no
Glyma01g37710	Glyma01g37710	Glyma01g37710	Gm01:50023553-50027805	ws82-0	ws82-7	OK	15.0952	12.9927	-0.216392	0.455348	0.648859	0.891741	no
Glyma01g37720	Glyma01g37720	Glyma01g37720	Gm01:50028224-50031144	ws82-0	ws82-7	OK	14.5139	7.03567	-1.04468	2.17459	0.0296611	0.233288	no
Glyma01g37730	Glyma01g37730	Glyma01g37730	Gm01:50039747-50044012	ws82-0	ws82-7	OK	4.37813	3.65664	-0.259796	0.521681	0.601893	0.875571	no
Glyma01g37750	Glyma01g37750	Glyma01g37750	Gm01:50051364-50051706	ws82-0	ws82-7	OK	0.358008	0.859729	1.26389	-0.824401	0.409712	0.772712	no
Glyma01g37760	Glyma01g37760	Glyma01g37760	Gm01:50053788-50061598	ws82-0	ws82-7	OK	0.983584	1.84502	0.907514	-1.74239	0.0814403	0.3979	no
Glyma01g37780	Glyma01g37780	Glyma01g37780	Gm01:50066372-50070574	ws82-0	ws82-7	OK	11.944	7.48203	-0.674782	1.37619	0.168762	0.554334	no
Glyma01g37790	Glyma01g37790	Glyma01g37790	Gm01:50071761-50075271	ws82-0	ws82-7	OK	15.069	18.3485	0.284079	-0.572593	0.56692	0.859066	no
Glyma01g37801	Glyma01g37801	Glyma01g37801	Gm01:50076638-50080885	ws82-0	ws82-7	NOTEST	0	0	0	0	1	1	no
Glyma01g37810	Glyma01g37810	Glyma01g37810	Gm01:50095935-50098278	ws82-0	ws82-7	OK	7.13131	0.520062	-3.77741	5.83906	5.24946e-09	1.442e-06	yes
Glyma01g37820	Glyma01g37820	Glyma01g37820	Gm01:50121728-50127532	ws82-0	ws82-7	NOTEST	0.215831	0.0232199	-3.21647	1.86826	0.0617258	1	no
Glyma01g37840	Glyma01g37840	Glyma01g37840	Gm01:50130998-50133253	ws82-0	ws82-7	NOTEST	0	0	0	0	1	1	no
Glyma01g37850	Glyma01g37850	Glyma01g37850	Gm01:50135076-50137305	ws82-0	ws82-7	NOTEST	0.130036	0.0822798	-0.660304	0.553968	0.579601	1	no
Glyma01g37860	Glyma01g37860	Glyma01g37860	Gm01:50141791-50144442	ws82-0	ws82-7	OK	1.25228	1.52839	0.287451	-0.450738	0.652179	0.893055	no
Glyma01g37870	Glyma01g37870	Glyma01g37870	Gm01:50146983-50150059	ws82-0	ws82-7	OK	26.5236	42.7746	0.689477	-1.28746	0.197934	0.590782	no
Glyma01g37880	Glyma01g37880	Glyma01g37880	Gm01:50151986-50153270	ws82-0	ws82-7	NOTEST	0.0874841	0.0576919	-0.600652	0.411451	0.680742	1	no
Glyma01g37890	Glyma01g37890	Glyma01g37890	Gm01:50153494-50155300	ws82-0	ws82-7	OK	4.8544	3.02211	-0.683738	1.28795	0.197763	0.590741	no
Glyma01g37900	Glyma01g37900	Glyma01g37900	Gm01:50155332-50163097	ws82-0	ws82-7	OK	103.332	80.2055	-0.365513	0.708594	0.478577	0.816257	no
Glyma01g37910	Glyma01g37910	Glyma01g37910	Gm01:50155332-50163097	ws82-0	ws82-7	OK	3.53234	2.1743	-0.700069	0.341549	0.73269	0.925659	no
Glyma01g37920	Glyma01g37920	Glyma01g37920	Gm01:50155332-50163097	ws82-0	ws82-7	NOTEST	0.203892	0.22961	0.171381	-0.0194955	0.984446	1	no
Glyma01g37930	Glyma01g37930	Glyma01g37930	Gm01:50166501-50169549	ws82-0	ws82-7	NOTEST	0.263021	0.0530804	-2.30893	2.11915	0.0340777	1	no
Glyma01g37940	Glyma01g37940	Glyma01g37940	Gm01:50177417-50180805	ws82-0	ws82-7	OK	11.6909	6.36044	-0.878183	1.83933	0.0658666	0.357666	no
Glyma01g37950	Glyma01g37950	Glyma01g37950	Gm01:50182416-50188946	ws82-0	ws82-7	OK	5.11207	2.68806	-0.927343	1.86087	0.0627623	0.347763	no
Glyma01g37961	Glyma01g37961	Glyma01g37961	Gm01:50206805-50209153	ws82-0	ws82-7	NOTEST	0	0.0956161	1.79769e+308	1.79769e+308	0.183103	1	no
Glyma01g37970	Glyma01g37970	Glyma01g37970	Gm01:50210431-50216350	ws82-0	ws82-7	OK	0.34677	0.747158	1.10744	-1.5663	0.117278	0.474912	no
Glyma01g37980	Glyma01g37980	Glyma01g37980	Gm01:50217118-50219743	ws82-0	ws82-7	NOTEST	0	0	0	0	1	1	no
Glyma01g37993	Glyma01g37993	Glyma01g37993	Gm01:50222810-50223758	ws82-0	ws82-7	NOTEST	0.0503355	0.146341	1.53969	-1.0043	0.315236	1	no
Glyma01g38006	Glyma01g38006	Glyma01g38006	Gm01:50230283-50235022	ws82-0	ws82-7	NOTEST	0	0	0	0	1	1	no
Glyma01g38020	Glyma01g38020	Glyma01g38020	Gm01:50230283-50235022	ws82-0	ws82-7	LOWDATA	0	0	0	0	1	1	no
Glyma01g38040	Glyma01g38040	Glyma01g38040	Gm01:50244376-50247091	ws82-0	ws82-7	NOTEST	0	0	0	0	1	1	no
Glyma01g38050	Glyma01g38050	Glyma01g38050	Gm01:50251094-50252088	ws82-0	ws82-7	NOTEST	0	0	0	0	1	1	no
Glyma01g38060	Glyma01g38060	Glyma01g38060	Gm01:50253664-50255929	ws82-0	ws82-7	NOTEST	0	0	0	0	1	1	no
Glyma01g38070	Glyma01g38070	Glyma01g38070	Gm01:50257294-50261107	ws82-0	ws82-7	OK	6.44096	3.82517	-0.751752	1.3568	0.174846	0.563647	no
Glyma01g38080	Glyma01g38080	Glyma01g38080	Gm01:50257294-50261107	ws82-0	ws82-7	OK	0	1.45554	1.79769e+308	1.79769e+308	0.13157	0.497391	no
Glyma01g38090	Glyma01g38090	Glyma01g38090	Gm01:50261440-50263777	ws82-0	ws82-7	OK	9.24827	6.02322	-0.618648	1.28086	0.200243	0.594467	no
Glyma01g38105	Glyma01g38105	Glyma01g38105	Gm01:50271874-50276395	ws82-0	ws82-7	NOTEST	0.0199474	0.0937728	2.23297	-1.03093	0.302571	1	no
Glyma01g38120	Glyma01g38120	Glyma01g38120	Gm01:50277040-50282069	ws82-0	ws82-7	OK	29.8936	26.4458	-0.1768	0.366218	0.714202	0.918295	no
Glyma01g38130	Glyma01g38130	Glyma01g38130	Gm01:50286808-50291347	ws82-0	ws82-7	OK	0.665798	4.41194	2.72826	-4.34004	1.42457e-05	0.00100266	yes
Glyma01g38150	Glyma01g38150	Glyma01g38150	Gm01:50297901-50304459	ws82-0	ws82-7	NOTEST	0.268708	0.322413	0.262871	-0.345558	0.729675	1	no
Glyma01g38165	Glyma01g38165	Glyma01g38165	Gm01:50306261-50309677	ws82-0	ws82-7	OK	3.22211	3.99398	0.309824	-0.498793	0.617926	0.881628	no
Glyma01g38180	Glyma01g38180	Glyma01g38180	Gm01:50334433-50339882	ws82-0	ws82-7	OK	3.91844	4.27152	0.124471	-0.233369	0.815475	0.952615	no
Glyma01g38190	Glyma01g38190	Glyma01g38190	Gm01:50334433-50339882	ws82-0	ws82-7	OK	0.69241	0.613054	-0.175613	0.0674213	0.946246	0.987955	no
Glyma01g38200	Glyma01g38200	Glyma01g38200	Gm01:50344732-50351525	ws82-0	ws82-7	OK	15.1795	9.42962	-0.686848	1.45123	0.146714	0.520104	no
Glyma01g38211	Glyma01g38211	Glyma01g38211	Gm01:50359266-50363158	ws82-0	ws82-7	OK	202.018	298.821	0.5648	-0.793606	0.427425	0.78371	no
Glyma01g38220	Glyma01g38220	Glyma01g38220	Gm01:50366968-50368330	ws82-0	ws82-7	OK	0.259991	0.583097	1.16527	-1.3327	0.182629	0.572694	no
Glyma01g38230	Glyma01g38230	Glyma01g38230	Gm01:50369093-50373219	ws82-0	ws82-7	OK	10.7776	8.47403	-0.346916	0.694619	0.487294	0.819688	no
Glyma01g38240	Glyma01g38240	Glyma01g38240	Gm01:50382617-50389821	ws82-0	ws82-7	OK	3.86639	2.15462	-0.843554	1.68883	0.0912516	0.42185	no
Glyma01g38250	Glyma01g38250	Glyma01g38250	Gm01:50392826-50393355	ws82-0	ws82-7	NOTEST	0	0	0	0	1	1	no
Glyma01g38260	Glyma01g38260	Glyma01g38260	Gm01:50394489-50396439	ws82-0	ws82-7	OK	0.951684	0.890368	-0.0960806	0.120904	0.903767	0.977675	no
Glyma01g38270	Glyma01g38270	Glyma01g38270	Gm01:50396914-50399570	ws82-0	ws82-7	OK	0.881649	1.14836	0.381293	-0.515186	0.606423	0.877238	no
Glyma01g38280	Glyma01g38280	Glyma01g38280	Gm01:50400416-50410022	ws82-0	ws82-7	OK	0.376387	0.523126	0.474945	-0.695229	0.486912	0.819613	no
Glyma01g38285	Glyma01g38285	Glyma01g38285	Gm01:50429282-50431539	ws82-0	ws82-7	NOTEST	0	0	0	0	1	1	no
Glyma01g38290	Glyma01g38290	Glyma01g38290	Gm01:50444755-50448681	ws82-0	ws82-7	OK	16.3184	8.45291	-0.948977	1.99403	0.0461485	0.296747	no
Glyma01g38305	Glyma01g38305	Glyma01g38305	Gm01:50449917-50454973	ws82-0	ws82-7	OK	2.16022	2.11617	-0.0297238	0.0544382	0.956586	0.990406	no
Glyma01g38320	Glyma01g38320	Glyma01g38320	Gm01:50456603-50460237	ws82-0	ws82-7	OK	13.6588	10.8031	-0.33839	0.667875	0.504213	0.829329	no
Glyma01g38330	Glyma01g38330	Glyma01g38330	Gm01:50462526-50464658	ws82-0	ws82-7	OK	2.46679	2.22523	-0.148679	0.221117	0.825002	0.956146	no
Glyma01g38340	Glyma01g38340	Glyma01g38340	Gm01:50465731-50468463	ws82-0	ws82-7	NOTEST	0	0	0	0	1	1	no
Glyma01g38350	Glyma01g38350	Glyma01g38350	Gm01:50468718-50471279	ws82-0	ws82-7	NOTEST	0.0453476	0.0889581	0.9721	-0.607226	0.543701	1	no
Glyma01g38360	Glyma01g38360	Glyma01g38360	Gm01:50481849-50484062	ws82-0	ws82-7	OK	8.39216	7.0595	-0.249476	0.526485	0.598551	0.874417	no
Glyma01g38370	Glyma01g38370	Glyma01g38370	Gm01:50487836-50491942	ws82-0	ws82-7	OK	12.2992	10.1638	-0.275112	0.546495	0.584726	0.868065	no
Glyma01g38381	Glyma01g38381	Glyma01g38381	Gm01:50492109-50499655	ws82-0	ws82-7	OK	1.92568	2.05818	0.0960047	-0.140901	0.887948	0.973361	no
Glyma01g38390	Glyma01g38390	Glyma01g38390	Gm01:50502781-50505172	ws82-0	ws82-7	NOTEST	0.0505595	0.0647404	0.356684	-0.206356	0.836513	1	no
Glyma01g38400	Glyma01g38400	Glyma01g38400	Gm01:50522426-50525037	ws82-0	ws82-7	OK	1.64674	2.37503	0.528331	-0.927641	0.353594	0.736777	no
Glyma01g38410	Glyma01g38410	Glyma01g38410	Gm01:50528621-50536566	ws82-0	ws82-7	OK	23.3209	8.27549	-1.49471	2.91791	0.0035239	0.062702	no
Glyma01g38430	Glyma01g38430	Glyma01g38430	Gm01:50543383-50544862	ws82-0	ws82-7	NOTEST	0	0	0	0	1	1	no
Glyma01g38450	Glyma01g38450	Glyma01g38450	Gm01:50549840-50551564	ws82-0	ws82-7	OK	29.138	19.1391	-0.606378	1.26985	0.204139	0.598171	no
Glyma01g38460	Glyma01g38460	Glyma01g38460	Gm01:50559469-50563981	ws82-0	ws82-7	OK	5.01888	2.32656	-1.10916	2.07407	0.0380724	0.26793	no
Glyma01g38470	Glyma01g38470	Glyma01g38470	Gm01:50564247-50567428	ws82-0	ws82-7	OK	71.2711	54.969	-0.374698	0.694229	0.487539	0.81975	no
Glyma01g38481	Glyma01g38481	Glyma01g38481	Gm01:50571005-50572016	ws82-0	ws82-7	NOTEST	0	0	0	0	1	1	no
Glyma01g38490	Glyma01g38490	Glyma01g38490	Gm01:50575585-50578085	ws82-0	ws82-7	OK	0.522022	0.553367	0.084127	-0.0993805	0.920836	0.981897	no
Glyma01g38500	Glyma01g38500	Glyma01g38500	Gm01:50580026-50582631	ws82-0	ws82-7	OK	2.86428	0.913446	-1.64878	2.63202	0.00848792	0.109259	no
Glyma01g38510	Glyma01g38510	Glyma01g38510	Gm01:50585499-50587165	ws82-0	ws82-7	OK	11.0704	7.18346	-0.623963	1.26874	0.204535	0.598668	no
Glyma01g38520	Glyma01g38520	Glyma01g38520	Gm01:50595299-50597560	ws82-0	ws82-7	OK	1.14709	0.764203	-0.585951	0.893971	0.371337	0.747974	no
Glyma01g38530	Glyma01g38530	Glyma01g38530	Gm01:50601604-50607434	ws82-0	ws82-7	NOTEST	0	0.0485241	1.79769e+308	1.79769e+308	0.164444	1	no
Glyma01g38540	Glyma01g38540	Glyma01g38540	Gm01:50612385-50613848	ws82-0	ws82-7	NOTEST	0	0	0	0	1	1	no
Glyma01g38550	Glyma01g38550	Glyma01g38550	Gm01:50621610-50624263	ws82-0	ws82-7	NOTEST	0	0	0	0	1	1	no
Glyma01g38560	Glyma01g38560	Glyma01g38560	Gm01:50625695-50629374	ws82-0	ws82-7	OK	1.21808	0.69902	-0.801202	1.37624	0.168748	0.554334	no
Glyma01g38570	Glyma01g38570	Glyma01g38570	Gm01:50630573-50632809	ws82-0	ws82-7	NOTEST	0.0334445	0.0867574	1.37522	-0.897016	0.36971	1	no
Glyma01g38580	Glyma01g38580	Glyma01g38580	Gm01:50633743-50644902	ws82-0	ws82-7	OK	0.508166	0.485895	-0.064657	0.0954654	0.923945	0.98266	no
Glyma01g38590	Glyma01g38590	Glyma01g38590	Gm01:50645459-50648060	ws82-0	ws82-7	OK	26.3366	11.0722	-1.25012	2.63297	0.00846408	0.109085	no
Glyma01g38600	Glyma01g38600	Glyma01g38600	Gm01:50652785-50654854	ws82-0	ws82-7	NOTEST	0	0	0	0	1	1	no
Glyma01g38610	Glyma01g38610	Glyma01g38610	Gm01:50657110-50660265	ws82-0	ws82-7	NOTEST	0	0.0394711	1.79769e+308	1.79769e+308	0.100645	1	no
Glyma01g38630	Glyma01g38630	Glyma01g38630	Gm01:50667181-50669294	ws82-0	ws82-7	NOTEST	0.0657992	0	-1.79769e+308	-1.79769e+308	0.0595194	1	no
Glyma01g38640	Glyma01g38640	Glyma01g38640	Gm01:50682059-50689940	ws82-0	ws82-7	OK	12.4262	11.4565	-0.11722	0.239037	0.811077	0.951999	no
Glyma01g38650	Glyma01g38650	Glyma01g38650	Gm01:50714207-50721679	ws82-0	ws82-7	OK	60.7189	24.4021	-1.31514	2.59309	0.0095119	0.117008	no
Glyma01g38660	Glyma01g38660	Glyma01g38660	Gm01:50733266-50737661	ws82-0	ws82-7	OK	0.770652	0.370429	-1.05688	1.48858	0.136597	0.503239	no
Glyma01g38671	Glyma01g38671	Glyma01g38671	Gm01:50746604-50760836	ws82-0	ws82-7	OK	1.62203	1.01312	-0.678988	1.21144	0.225727	0.622116	no
Glyma01g38680	Glyma01g38680	Glyma01g38680	Gm01:50767560-50772744	ws82-0	ws82-7	OK	2.90236	0.997807	-1.54039	2.72182	0.00649233	0.0917483	no
Glyma01g38683	Glyma01g38683	Glyma01g38683	Gm01:50776465-50776986	ws82-0	ws82-7	NOTEST	0	0	0	0	1	1	no
Glyma01g38686	Glyma01g38686	Glyma01g38686	Gm01:50778421-50779180	ws82-0	ws82-7	NOTEST	0	0	0	0	1	1	no
Glyma01g38690	Glyma01g38690	Glyma01g38690	Gm01:50779484-50780771	ws82-0	ws82-7	OK	0.147738	0.377215	1.35234	-1.48142	0.138495	0.506412	no
Glyma01g38710	Glyma01g38710	Glyma01g38710	Gm01:50784350-50784782	ws82-0	ws82-7	OK	0.492815	0.112031	-2.13715	1.20989	0.226323	0.622622	no
Glyma01g38720	Glyma01g38720	Glyma01g38720	Gm01:50799865-50800659	ws82-0	ws82-7	NOTEST	0	0.177999	1.79769e+308	1.79769e+308	0.0353652	1	no
Glyma01g38730	Glyma01g38730	Glyma01g38730	Gm01:50805196-50807200	ws82-0	ws82-7	NOTEST	0.0935839	0.177483	0.923346	-0.930581	0.35207	1	no
Glyma01g38740	Glyma01g38740	Glyma01g38740	Gm01:50808925-50811172	ws82-0	ws82-7	OK	2.8962	3.23431	0.159297	-0.24121	0.809393	0.951455	no
Glyma01g38750	Glyma01g38750	Glyma01g38750	Gm01:50813274-50815197	ws82-0	ws82-7	OK	1480.55	960.567	-0.624171	0.930099	0.35232	0.736133	no
Glyma01g38760	Glyma01g38760	Glyma01g38760	Gm01:50816662-50817396	ws82-0	ws82-7	NOTEST	0	0	0	0	1	1	no
Glyma01g38770	Glyma01g38770	Glyma01g38770	Gm01:50817872-50819939	ws82-0	ws82-7	OK	5.49782	3.94254	-0.479737	0.826042	0.40878	0.772469	no
Glyma01g38780	Glyma01g38780	Glyma01g38780	Gm01:50823650-50825788	ws82-0	ws82-7	NOTEST	0.121446	0.0207832	-2.54682	1.45924	0.144499	1	no
Glyma01g38800	Glyma01g38800	Glyma01g38800	Gm01:50835383-50838753	ws82-0	ws82-7	OK	11.0581	10.7442	-0.0415548	0.0879281	0.929934	0.983951	no
Glyma01g38830	Glyma01g38830	Glyma01g38830	Gm01:50842944-50844670	ws82-0	ws82-7	NOTEST	0	0	0	0	1	1	no
Glyma01g38840	Glyma01g38840	Glyma01g38840	Gm01:50846296-50851361	ws82-0	ws82-7	OK	3.04137	2.61066	-0.220309	0.412266	0.680145	0.904266	no
Glyma01g38850	Glyma01g38850	Glyma01g38850	Gm01:50852873-50855077	ws82-0	ws82-7	OK	1.70541	1.71907	0.0115065	-0.0179818	0.985653	0.997211	no
Glyma01g38860	Glyma01g38860	Glyma01g38860	Gm01:50858802-50861902	ws82-0	ws82-7	NOTEST	0.0313904	0.021636	-0.536893	0.260056	0.79482	1	no
Glyma01g38870	Glyma01g38870	Glyma01g38870	Gm01:50865163-50867505	ws82-0	ws82-7	NOTEST	0.0994351	0.0325657	-1.6104	1.20993	0.226304	1	no
Glyma01g38880	Glyma01g38880	Glyma01g38880	Gm01:50879358-50885115	ws82-0	ws82-7	OK	1.11361	0.369084	-1.59323	2.21377	0.0268444	0.220679	no
Glyma01g38890	Glyma01g38890	Glyma01g38890	Gm01:50885116-50891376	ws82-0	ws82-7	OK	4.56075	3.0559	-0.577673	1.19964	0.230279	0.625888	no
Glyma01g38900	Glyma01g38900	Glyma01g38900	Gm01:50896720-50898557	ws82-0	ws82-7	NOTEST	0	0.0858239	1.79769e+308	1.79769e+308	0.0247313	1	no
Glyma01g38905	Glyma01g38905	Glyma01g38905	Gm01:50904042-50904806	ws82-0	ws82-7	NOTEST	0	0	0	0	1	1	no
Glyma01g38910	Glyma01g38910	Glyma01g38910	Gm01:50905481-50907657	ws82-0	ws82-7	OK	1.81109	2.3977	0.40479	-0.621881	0.53402	0.843278	no
Glyma01g38920	Glyma01g38920	Glyma01g38920	Gm01:50914354-50920765	ws82-0	ws82-7	OK	1.27952	0.862808	-0.568486	0.924611	0.355168	0.737297	no
Glyma01g38930	Glyma01g38930	Glyma01g38930	Gm01:50921917-50923972	ws82-0	ws82-7	OK	74.5945	92.9512	0.317403	-0.648308	0.516786	0.835437	no
Glyma01g38940	Glyma01g38940	Glyma01g38940	Gm01:50926261-50927303	ws82-0	ws82-7	OK	143.753	185.815	0.370277	-0.729899	0.465452	0.808671	no
Glyma01g38950	Glyma01g38950	Glyma01g38950	Gm01:50927363-50936118	ws82-0	ws82-7	OK	11.0919	20.0223	0.852101	-1.7366	0.0824584	0.400635	no
Glyma01g38970	Glyma01g38970	Glyma01g38970	Gm01:50951026-50952807	ws82-0	ws82-7	OK	1.69807	1.47867	-0.199596	0.317123	0.751151	0.931039	no
Glyma01g38980	Glyma01g38980	Glyma01g38980	Gm01:50956636-50960580	ws82-0	ws82-7	OK	1.17004	1.95134	0.737901	-1.23984	0.215034	0.610657	no
Glyma01g38990	Glyma01g38990	Glyma01g38990	Gm01:50965004-50966084	ws82-0	ws82-7	OK	1.50422	0.124342	-3.59664	2.87138	0.00408678	0.0691632	no
Glyma01g39000	Glyma01g39000	Glyma01g39000	Gm01:50968054-50971842	ws82-0	ws82-7	OK	4.10448	1.45754	-1.49366	2.8335	0.00460413	0.0743958	no
Glyma01g39010	Glyma01g39010	Glyma01g39010	Gm01:50973225-50978011	ws82-0	ws82-7	OK	1.86521	0.594289	-1.6501	2.74752	0.00600483	0.0873473	no
Glyma01g39020	Glyma01g39020	Glyma01g39020	Gm01:50978689-50990291	ws82-0	ws82-7	OK	7.4794	3.59968	-1.05505	2.09132	0.0364993	0.260911	no
Glyma01g39030	Glyma01g39030	Glyma01g39030	Gm01:50993362-50998484	ws82-0	ws82-7	OK	9.86544	8.23778	-0.260128	0.472515	0.63656	0.887333	no
Glyma01g39040	Glyma01g39040	Glyma01g39040	Gm01:51015839-51018131	ws82-0	ws82-7	OK	0.48037	0.605483	0.333939	-0.451334	0.651749	0.892945	no
Glyma01g39050	Glyma01g39050	Glyma01g39050	Gm01:51020378-51026936	ws82-0	ws82-7	OK	2.90481	2.56553	-0.179187	0.336188	0.736729	0.926725	no
Glyma01g39060	Glyma01g39060	Glyma01g39060	Gm01:51032159-51036122	ws82-0	ws82-7	NOTEST	0.0245905	0	-1.79769e+308	-1.79769e+308	0.237833	1	no
Glyma01g39071	Glyma01g39071	Glyma01g39071	Gm01:51054324-51059649	ws82-0	ws82-7	NOTEST	0	0	0	0	1	1	no
Glyma01g39080	Glyma01g39080	Glyma01g39080	Gm01:51065275-51067178	ws82-0	ws82-7	NOTEST	0	0	0	0	1	1	no
Glyma01g39090	Glyma01g39090	Glyma01g39090	Gm01:51073678-51079219	ws82-0	ws82-7	OK	0.717153	0.999431	0.478826	-0.719374	0.47191	0.81305	no
Glyma01g39100	Glyma01g39100	Glyma01g39100	Gm01:51080529-51083731	ws82-0	ws82-7	OK	4.17893	3.34468	-0.321268	0.621557	0.534233	0.843278	no
Glyma01g39110	Glyma01g39110	Glyma01g39110	Gm01:51090471-51105666	ws82-0	ws82-7	OK	0.62084	0.924784	0.574895	-0.89109	0.372881	0.74878	no
Glyma01g39120	Glyma01g39120	Glyma01g39120	Gm01:51105888-51110702	ws82-0	ws82-7	OK	19.11	58.5218	1.61464	-2.49412	0.0126268	0.138512	no
Glyma01g39141	Glyma01g39141	Glyma01g39141	Gm01:51125197-51131131	ws82-0	ws82-7	OK	1.9493	2.75736	0.500332	-0.995795	0.31935	0.710881	no
Glyma01g39160	Glyma01g39160	Glyma01g39160	Gm01:51146769-51147427	ws82-0	ws82-7	NOTEST	0	0	0	0	1	1	no
Glyma01g39170	Glyma01g39170	Glyma01g39170	Gm01:51153265-51154075	ws82-0	ws82-7	NOTEST	0	0	0	0	1	1	no
Glyma01g39180	Glyma01g39180	Glyma01g39180	Gm01:51160065-51160350	ws82-0	ws82-7	NOTEST	0	0	0	0	1	1	no
Glyma01g39190	Glyma01g39190	Glyma01g39190	Gm01:51164315-51168296	ws82-0	ws82-7	OK	0.796942	1.30697	0.71368	-0.818532	0.413054	0.774606	no
Glyma01g39200	Glyma01g39200	Glyma01g39200	Gm01:51176939-51182827	ws82-0	ws82-7	OK	52.783	36.6581	-0.525941	1.09117	0.275199	0.671585	no
Glyma01g39220	Glyma01g39220	Glyma01g39220	Gm01:51195447-51198098	ws82-0	ws82-7	OK	3.60796	7.12967	0.982653	-1.97083	0.0487439	0.306208	no
Glyma01g39230	Glyma01g39230	Glyma01g39230	Gm01:51207026-51208664	ws82-0	ws82-7	NOTEST	0	0	0	0	1	1	no
Glyma01g39240	Glyma01g39240	Glyma01g39240	Gm01:51218796-51220209	ws82-0	ws82-7	OK	4.98273	5.59144	0.166284	-0.312834	0.754407	0.932259	no
Glyma01g39250	Glyma01g39250	Glyma01g39250	Gm01:51223239-51226456	ws82-0	ws82-7	OK	13.0201	8.2054	-0.666099	1.02466	0.305523	0.698748	no
Glyma01g39260	Glyma01g39260	Glyma01g39260	Gm01:51227462-51229777	ws82-0	ws82-7	OK	11.4838	3.02512	-1.92454	3.80278	0.000143079	0.00618421	yes
Glyma01g39270	Glyma01g39270	Glyma01g39270	Gm01:51234092-51236207	ws82-0	ws82-7	OK	93.6613	151.908	0.697671	-1.34281	0.179335	0.569229	no
Glyma01g39280	Glyma01g39280	Glyma01g39280	Gm01:51241780-51246700	ws82-0	ws82-7	OK	18.7369	25.5634	0.448195	-0.936774	0.348875	0.7337	no
Glyma01g39290	Glyma01g39290	Glyma01g39290	Gm01:51259529-51261619	ws82-0	ws82-7	OK	2.63893	2.50183	-0.0769738	0.145515	0.884304	0.972358	no
Glyma01g39300	Glyma01g39300	Glyma01g39300	Gm01:51273336-51279506	ws82-0	ws82-7	NOTEST	0	0	0	0	1	1	no
Glyma01g39306	Glyma01g39306	Glyma01g39306	Gm01:51273336-51279506	ws82-0	ws82-7	NOTEST	0	0	0	0	1	1	no
Glyma01g39313	Glyma01g39313	Glyma01g39313	Gm01:51280851-51284021	ws82-0	ws82-7	NOTEST	0	0	0	0	1	1	no
Glyma01g39320	Glyma01g39320	Glyma01g39320	Gm01:51287475-51290552	ws82-0	ws82-7	OK	3.12815	2.97817	-0.0708822	0.131854	0.8951	0.975294	no
Glyma01g39330	Glyma01g39330	Glyma01g39330	Gm01:51290922-51295650	ws82-0	ws82-7	OK	15.142	12.4452	-0.282975	0.598909	0.549234	0.851545	no
Glyma01g39340	Glyma01g39340	Glyma01g39340	Gm01:51296877-51297857	ws82-0	ws82-7	OK	1.30275	0.780583	-0.73893	0.89942	0.368429	0.746384	no
Glyma01g39350	Glyma01g39350	Glyma01g39350	Gm01:51298441-51305321	ws82-0	ws82-7	OK	52.4135	13.1778	-1.99183	4.15354	3.27377e-05	0.00193964	yes
Glyma01g39360	Glyma01g39360	Glyma01g39360	Gm01:51314677-51315832	ws82-0	ws82-7	NOTEST	0	0	0	0	1	1	no
Glyma01g39370	Glyma01g39370	Glyma01g39370	Gm01:51321188-51322374	ws82-0	ws82-7	OK	4.51264	4.48212	-0.00979097	0.0180555	0.985595	0.997211	no
Glyma01g39380	Glyma01g39380	Glyma01g39380	Gm01:51332253-51333769	ws82-0	ws82-7	NOTEST	0.0326963	0.0333197	0.0272479	-0.0147501	0.988232	1	no
Glyma01g39391	Glyma01g39391	Glyma01g39391	Gm01:51334950-51335823	ws82-0	ws82-7	NOTEST	0	0	0	0	1	1	no
Glyma01g39401	Glyma01g39401	Glyma01g39401	Gm01:51345282-51346122	ws82-0	ws82-7	NOTEST	0	0	0	0	1	1	no
Glyma01g39410	Glyma01g39410	Glyma01g39410	Gm01:51349990-51355206	ws82-0	ws82-7	OK	2.94076	11.3452	1.94782	-3.43627	0.000589784	0.0182866	yes
Glyma01g39420	Glyma01g39420	Glyma01g39420	Gm01:51355206-51358366	ws82-0	ws82-7	OK	4.97425	3.84619	-0.37105	0.752348	0.451842	0.800251	no
Glyma01g39430	Glyma01g39430	Glyma01g39430	Gm01:51363128-51376630	ws82-0	ws82-7	OK	0.426321	0.570719	0.42084	-0.690799	0.489692	0.820315	no
Glyma01g39440	Glyma01g39440	Glyma01g39440	Gm01:51376879-51383234	ws82-0	ws82-7	NOTEST	0	0	0	0	1	1	no
Glyma01g39451	Glyma01g39451	Glyma01g39451	Gm01:51385174-51388582	ws82-0	ws82-7	OK	0.498896	0.256984	-0.957059	1.18194	0.23723	0.634145	no
Glyma01g39460	Glyma01g39460	Glyma01g39460	Gm01:51397147-51399175	ws82-0	ws82-7	OK	3.91624	7.65869	0.967628	-1.78201	0.0747475	0.381696	no
Glyma01g39470	Glyma01g39470	Glyma01g39470	Gm01:51403228-51406259	ws82-0	ws82-7	OK	2.26981	2.21233	-0.0370052	0.0558787	0.955438	0.990051	no
Glyma01g39480	Glyma01g39480	Glyma01g39480	Gm01:51407024-51411165	ws82-0	ws82-7	NOTEST	0.108852	0.196296	0.850667	-0.908293	0.363723	1	no
Glyma01g39490	Glyma01g39490	Glyma01g39490	Gm01:51412886-51422885	ws82-0	ws82-7	OK	1.28161	1.71649	0.421507	-0.766929	0.443124	0.794761	no
Glyma01g39500	Glyma01g39500	Glyma01g39500	Gm01:51428871-51431363	ws82-0	ws82-7	OK	46.4022	70.2633	0.598579	-1.23034	0.21857	0.614361	no
Glyma01g39510	Glyma01g39510	Glyma01g39510	Gm01:51431925-51439061	ws82-0	ws82-7	OK	1.0875	0.686763	-0.663125	1.11091	0.266609	0.664036	no
Glyma01g39520	Glyma01g39520	Glyma01g39520	Gm01:51456457-51460406	ws82-0	ws82-7	OK	6.58937	5.82333	-0.178296	0.335251	0.737436	0.926807	no
Glyma01g39530	Glyma01g39530	Glyma01g39530	Gm01:51483951-51489283	ws82-0	ws82-7	OK	210.141	283.877	0.433908	-0.787191	0.43117	0.786599	no
Glyma01g39540	Glyma01g39540	Glyma01g39540	Gm01:51490230-51491823	ws82-0	ws82-7	OK	29.2532	33.7165	0.204861	-0.428624	0.668197	0.899371	no
Glyma01g39560	Glyma01g39560	Glyma01g39560	Gm01:51508290-51512259	ws82-0	ws82-7	OK	10.2277	11.024	0.108168	-0.219924	0.82593	0.956146	no
Glyma01g39570	Glyma01g39570	Glyma01g39570	Gm01:51516172-51517312	ws82-0	ws82-7	OK	0.485803	0.171714	-1.50037	1.65593	0.0977364	0.435999	no
Glyma01g39580	Glyma01g39580	Glyma01g39580	Gm01:51518038-51522362	ws82-0	ws82-7	OK	19.8415	12.98	-0.612232	1.28791	0.197779	0.590741	no
Glyma01g39590	Glyma01g39590	Glyma01g39590	Gm01:51527348-51528891	ws82-0	ws82-7	OK	0.503668	1.08232	1.10359	-1.50102	0.133349	0.500096	no
Glyma01g39600	Glyma01g39600	Glyma01g39600	Gm01:51531989-51534998	ws82-0	ws82-7	OK	10.4442	5.05013	-1.04831	2.00259	0.045221	0.293968	no
Glyma01g39610	Glyma01g39610	Glyma01g39610	Gm01:51545785-51549819	ws82-0	ws82-7	OK	4.08519	1.61802	-1.33617	2.54183	0.0110273	0.128605	no
Glyma01g39630	Glyma01g39630	Glyma01g39630	Gm01:51555027-51556605	ws82-0	ws82-7	NOTEST	0.332981	0.0734124	-2.18134	1.99035	0.0465521	1	no
Glyma01g39640	Glyma01g39640	Glyma01g39640	Gm01:51557943-51560354	ws82-0	ws82-7	OK	10.1404	7.085	-0.51727	1.03127	0.302415	0.695779	no
Glyma01g39650	Glyma01g39650	Glyma01g39650	Gm01:51565663-51573461	ws82-0	ws82-7	OK	3.14943	2.68052	-0.23258	0.449956	0.652742	0.893081	no
Glyma01g39660	Glyma01g39660	Glyma01g39660	Gm01:51574045-51576407	ws82-0	ws82-7	OK	2.90621	1.00547	-1.53127	2.67563	0.00745883	0.100738	no
Glyma01g39690	Glyma01g39690	Glyma01g39690	Gm01:51579270-51581490	ws82-0	ws82-7	NOTEST	0.124372	0.150792	0.277892	-0.283843	0.776531	1	no
Glyma01g39700	Glyma01g39700	Glyma01g39700	Gm01:51584479-51586969	ws82-0	ws82-7	OK	8.02866	5.05507	-0.667428	1.1552	0.248009	0.645016	no
Glyma01g39710	Glyma01g39710	Glyma01g39710	Gm01:51587208-51587971	ws82-0	ws82-7	OK	0.909687	0.195588	-2.21755	2.02339	0.0430326	0.284981	no
Glyma01g39720	Glyma01g39720	Glyma01g39720	Gm01:51588563-51590809	ws82-0	ws82-7	OK	0.387658	0.195145	-0.990238	1.15926	0.246351	0.643122	no
Glyma01g39740	Glyma01g39740	Glyma01g39740	Gm01:51613142-51614901	ws82-0	ws82-7	OK	35.5485	13.099	-1.44033	3.0143	0.00257575	0.0510817	no
Glyma01g39750	Glyma01g39750	Glyma01g39750	Gm01:51624486-51625983	ws82-0	ws82-7	OK	1.06925	0.551789	-0.954411	1.03303	0.301589	0.694891	no
Glyma01g39760	Glyma01g39760	Glyma01g39760	Gm01:51627630-51629200	ws82-0	ws82-7	NOTEST	0.242222	0	-1.79769e+308	-1.79769e+308	0.0125523	1	no
Glyma01g39770	Glyma01g39770	Glyma01g39770	Gm01:51633199-51634269	ws82-0	ws82-7	OK	4.8687	9.07832	0.898888	-1.56485	0.117617	0.475302	no
Glyma01g39780	Glyma01g39780	Glyma01g39780	Gm01:51645378-51647678	ws82-0	ws82-7	NOTEST	0.0444514	0.289813	2.70482	-2.49859	0.0124688	1	no
Glyma01g39790	Glyma01g39790	Glyma01g39790	Gm01:51653322-51656914	ws82-0	ws82-7	OK	9.07481	15.0766	0.732368	-1.54368	0.122667	0.483121	no
Glyma01g39800	Glyma01g39800	Glyma01g39800	Gm01:51659391-51665037	ws82-0	ws82-7	OK	2.54391	1.45762	-0.803432	1.39171	0.164011	0.548359	no
Glyma01g39810	Glyma01g39810	Glyma01g39810	Gm01:51668222-51670161	ws82-0	ws82-7	OK	42.5958	12.3866	-1.78193	3.7213	0.000198201	0.00806474	yes
Glyma01g39820	Glyma01g39820	Glyma01g39820	Gm01:51675929-51677501	ws82-0	ws82-7	NOTEST	0	0	0	0	1	1	no
Glyma01g39830	Glyma01g39830	Glyma01g39830	Gm01:51679882-51690594	ws82-0	ws82-7	OK	5.37909	3.23352	-0.734255	1.4703	0.14148	0.511507	no
Glyma01g39850	Glyma01g39850	Glyma01g39850	Gm01:51698415-51700257	ws82-0	ws82-7	OK	55.047	34.6977	-0.665823	1.38644	0.165614	0.550688	no
Glyma01g39860	Glyma01g39860	Glyma01g39860	Gm01:51704330-51708072	ws82-0	ws82-7	OK	3.85751	0.443158	-3.12177	4.63506	3.56838e-06	0.000328548	yes
Glyma01g39870	Glyma01g39870	Glyma01g39870	Gm01:51714716-51716494	ws82-0	ws82-7	NOTEST	0	0.0201897	1.79769e+308	1.79769e+308	0.183103	1	no
Glyma01g39880	Glyma01g39880	Glyma01g39880	Gm01:51721226-51730602	ws82-0	ws82-7	OK	0.665463	0.390969	-0.767303	0.213473	0.830958	0.957766	no
Glyma01g39890	Glyma01g39890	Glyma01g39890	Gm01:51721226-51730602	ws82-0	ws82-7	OK	34.956	39.4029	0.172759	-0.355514	0.722204	0.921504	no
Glyma01g39900	Glyma01g39900	Glyma01g39900	Gm01:51730921-51747255	ws82-0	ws82-7	NOTEST	0	0.0344238	1.79769e+308	1.79769e+308	0.3575	1	no
Glyma01g39910	Glyma01g39910	Glyma01g39910	Gm01:51730921-51747255	ws82-0	ws82-7	OK	1.00624	1.29105	0.35957	-0.453756	0.650005	0.892215	no
Glyma01g39920	Glyma01g39920	Glyma01g39920	Gm01:51750715-51754579	ws82-0	ws82-7	OK	1.86704	1.1561	-0.691486	0.927288	0.353777	0.736862	no
Glyma01g39935	Glyma01g39935	Glyma01g39935	Gm01:51755461-51757387	ws82-0	ws82-7	OK	21.283	20.4594	-0.0569361	0.119919	0.904547	0.978102	no
Glyma01g39950	Glyma01g39950	Glyma01g39950	Gm01:51758052-51764933	ws82-0	ws82-7	OK	15.5648	10.6447	-0.548157	1.15974	0.246154	0.642875	no
Glyma01g39960	Glyma01g39960	Glyma01g39960	Gm01:51768697-51773656	ws82-0	ws82-7	OK	10.7613	15.2718	0.505024	-1.06622	0.286324	0.681303	no
Glyma01g39970	Glyma01g39970	Glyma01g39970	Gm01:51778756-51782898	ws82-0	ws82-7	OK	12.6759	14.8464	0.228027	-0.481546	0.630128	0.885977	no
Glyma01g39981	Glyma01g39981	Glyma01g39981	Gm01:51784287-51787179	ws82-0	ws82-7	OK	3.83386	1.75889	-1.12413	1.69514	0.0900496	0.419491	no
Glyma01g39990	Glyma01g39990	Glyma01g39990	Gm01:51795376-51797766	ws82-0	ws82-7	OK	0.455658	0.565317	0.311108	-0.39772	0.690837	0.908514	no
Glyma01g40010	Glyma01g40010	Glyma01g40010	Gm01:51813387-51815770	ws82-0	ws82-7	OK	16.2271	8.27969	-0.970761	2.04658	0.0406996	0.277854	no
Glyma01g40030	Glyma01g40030	Glyma01g40030	Gm01:51830579-51838128	ws82-0	ws82-7	OK	3.44969	1.86107	-0.890335	0.398756	0.690073	0.908166	no
Glyma01g40041	Glyma01g40041	Glyma01g40041	Gm01:51830579-51838128	ws82-0	ws82-7	OK	1.62292	2.92004	0.847392	-1.48784	0.136792	0.503676	no
Glyma01g40050	Glyma01g40050	Glyma01g40050	Gm01:51861767-51863943	ws82-0	ws82-7	OK	1.01387	0.299	-1.76165	2.40886	0.0160022	0.160157	no
Glyma01g40060	Glyma01g40060	Glyma01g40060	Gm01:51873281-51875272	ws82-0	ws82-7	NOTEST	0	0	0	0	1	1	no
Glyma01g40080	Glyma01g40080	Glyma01g40080	Gm01:51889805-51895295	ws82-0	ws82-7	OK	3.55716	1.12885	-1.65586	3.19768	0.00138536	0.03321	yes
Glyma01g40090	Glyma01g40090	Glyma01g40090	Gm01:51899586-51905304	ws82-0	ws82-7	OK	0.621147	0.310166	-1.00189	1.21443	0.224585	0.620614	no
Glyma01g40100	Glyma01g40100	Glyma01g40100	Gm01:51910087-51912612	ws82-0	ws82-7	NOTEST	0.0313215	0.0378997	0.275032	-0.159117	0.873577	1	no
Glyma01g40110	Glyma01g40110	Glyma01g40110	Gm01:51918737-51926979	ws82-0	ws82-7	NOTEST	0.0393846	0.0343439	-0.19758	0.166558	0.867718	1	no
Glyma01g40130	Glyma01g40130	Glyma01g40130	Gm01:51926992-51932894	ws82-0	ws82-7	OK	9.26433	9.74097	0.0723785	-0.149438	0.881208	0.971861	no
Glyma01g40140	Glyma01g40140	Glyma01g40140	Gm01:51939465-51943260	ws82-0	ws82-7	OK	15.6669	12.0127	-0.383167	0.808902	0.418571	0.777609	no
Glyma01g40150	Glyma01g40150	Glyma01g40150	Gm01:51946620-51947536	ws82-0	ws82-7	OK	39.9995	37.3532	-0.0987517	0.208619	0.834746	0.95853	no
Glyma01g40161	Glyma01g40161	Glyma01g40161	Gm01:51948401-51952638	ws82-0	ws82-7	OK	0.610479	0.569935	-0.0991433	0.136808	0.891182	0.974151	no
Glyma01g40170	Glyma01g40170	Glyma01g40170	Gm01:51956944-51961922	ws82-0	ws82-7	OK	3.95136	3.70892	-0.0913505	0.183763	0.8542	0.96386	no
Glyma01g40180	Glyma01g40180	Glyma01g40180	Gm01:51965657-51969274	ws82-0	ws82-7	OK	3.18918	2.05081	-0.636993	1.20364	0.228729	0.624241	no
Glyma01g40190	Glyma01g40190	Glyma01g40190	Gm01:51969918-51974115	ws82-0	ws82-7	OK	2.10734	1.775	-0.247599	0.442867	0.657862	0.894975	no
[truncated: 52,176 more rows]
