# Supplementary material for: Overexpression of a Cinnamyl Alcohol Dehydrogenase-Coding Gene, GsCAD1, from Wild Soybean Enhances Resistance to Soybean Mosaic Virus
Source: MDPI journal article supplement (doi:10.3390/ijms232315206), 2022-12-02
Supplement: s1 [file s1 › Table S4 Ws82-0D-vs-14D.xlsx]

## Sheet: Sheet1
test_id	gene_id	gene	locus	sample_1	sample_2	status	value_1	value_2	log2(fold_change)	test_stat	p_value	q_value	significant
Glyma0002s50	Glyma0002s50	Glyma0002s50	Gm02:2248-17672	ws82-0	ws82-14	OK	1.11937	1.3046	0.220914	-0.447675	0.654388	0.946814	no
Glyma0003s50	Glyma0003s50	Glyma0003s50	Gm03:8648-28244	ws82-0	ws82-14	OK	3.8591	3.25877	-0.243938	0.470299	0.638142	0.942784	no
Glyma0005s50	Glyma0005s50	Glyma0005s50	Gm05:16184-21667	ws82-0	ws82-14	OK	0.689213	0.66029	-0.0618496	0.0812962	0.935206	0.995582	no
Glyma0006s50	Glyma0006s50	Glyma0006s50	Gm06:1757-15096	ws82-0	ws82-14	OK	4.55703	4.3821	-0.0564711	0.117589	0.906393	0.992024	no
Glyma0007s50	Glyma0007s50	Glyma0007s50	Gm07:1209-3554	ws82-0	ws82-14	NOTEST	0	0	0	0	1	1	no
Glyma0010s50	Glyma0010s50	Glyma0010s50	Gm10:10493-13224	ws82-0	ws82-14	NOTEST	0.0100178	0.00719281	-0.477937	0.0824834	0.934262	1	no
Glyma0011s50	Glyma0011s50	Glyma0011s50	Gm11:1119-5508	ws82-0	ws82-14	NOTEST	0.0538645	0.0527013	-0.0314964	0.0203646	0.983753	1	no
Glyma0015s50	Glyma0015s50	Glyma0015s50	Gm15:626-2726	ws82-0	ws82-14	OK	0.468163	0.465085	-0.00951407	0.0108328	0.991357	0.9991	no
Glyma0017s50	Glyma0017s50	Glyma0017s50	Gm17:405-1845	ws82-0	ws82-14	OK	0.798198	0.745885	-0.0977926	0.0937968	0.925271	0.993813	no
Glyma0018s50	Glyma0018s50	Glyma0018s50	Gm18:2484-40137	ws82-0	ws82-14	OK	2.6238	2.47075	-0.0867075	0.193847	0.846296	0.982949	no
Glyma0021s00410	Glyma0021s00410	Glyma0021s00410	scaffold_21:663659-664067	ws82-0	ws82-14	NOTEST	0	0	0	0	1	1	no
Glyma0021s00426	Glyma0021s00426	Glyma0021s00426	scaffold_21:684712-690812	ws82-0	ws82-14	OK	1.59692	0	-1.79769e+308	-1.79769e+308	0.024406	0.210999	no
Glyma0021s00443	Glyma0021s00443	Glyma0021s00443	scaffold_21:692299-694156	ws82-0	ws82-14	OK	0.526513	0.832831	0.661554	-0.610854	0.541296	0.910531	no
Glyma0021s00460	Glyma0021s00460	Glyma0021s00460	scaffold_21:716657-721100	ws82-0	ws82-14	OK	1.43739	1.65583	0.20411	-0.301609	0.76295	0.971019	no
Glyma0022s00200	Glyma0022s00200	Glyma0022s00200	scaffold_22:543542-558386	ws82-0	ws82-14	NOTEST	0	0	0	0	1	1	no
Glyma0022s00273	Glyma0022s00273	Glyma0022s00273	scaffold_22:561854-563467	ws82-0	ws82-14	NOTEST	0	0	0	0	1	1	no
Glyma0022s00346	Glyma0022s00346	Glyma0022s00346	scaffold_22:563726-567494	ws82-0	ws82-14	NOTEST	0	0	0	0	1	1	no
Glyma0022s00420	Glyma0022s00420	Glyma0022s00420	scaffold_22:722866-725638	ws82-0	ws82-14	OK	8.42103	6.09818	-0.465618	1.03176	0.302185	0.777061	no
Glyma0022s00430	Glyma0022s00430	Glyma0022s00430	scaffold_22:728729-731634	ws82-0	ws82-14	NOTEST	0.0690792	0.38009	2.46002	-0.957807	0.33816	1	no
Glyma0022s00443	Glyma0022s00443	Glyma0022s00443	scaffold_22:800491-802362	ws82-0	ws82-14	NOTEST	0	0	0	0	1	1	no
Glyma0022s00456	Glyma0022s00456	Glyma0022s00456	scaffold_22:942964-948274	ws82-0	ws82-14	OK	4.19994	4.25749	0.0196341	-0.0238414	0.980979	0.998584	no
Glyma0022s00470	Glyma0022s00470	Glyma0022s00470	scaffold_22:942964-948274	ws82-0	ws82-14	NOTEST	0.34915	0	-1.79769e+308	-1.79769e+308	0.304321	1	no
Glyma0022s00480	Glyma0022s00480	Glyma0022s00480	scaffold_22:952859-956925	ws82-0	ws82-14	OK	0.688181	3.62697	2.3979	-3.66496	0.000247381	0.00815558	yes
Glyma0023s00410	Glyma0023s00410	Glyma0023s00410	scaffold_23:476540-479148	ws82-0	ws82-14	OK	6.69829	2.92412	-1.19579	2.30266	0.0212982	0.193005	no
Glyma0023s00515	Glyma0023s00515	Glyma0023s00515	scaffold_23:689759-693471	ws82-0	ws82-14	OK	1.58571	0.912533	-0.797183	0.974487	0.329815	0.801762	no
Glyma0023s00620	Glyma0023s00620	Glyma0023s00620	scaffold_23:694208-709536	ws82-0	ws82-14	OK	3.88126	3.95668	0.0277665	-0.0468374	0.962643	0.997565	no
Glyma0023s00670	Glyma0023s00670	Glyma0023s00670	scaffold_23:882926-883789	ws82-0	ws82-14	NOTEST	0	0	0	0	1	1	no
Glyma0024s00230	Glyma0024s00230	Glyma0024s00230	scaffold_24:8124-13007	ws82-0	ws82-14	OK	3.22107	3.46038	0.103392	-0.198611	0.842567	0.982448	no
Glyma0024s00245	Glyma0024s00245	Glyma0024s00245	scaffold_24:191608-197085	ws82-0	ws82-14	NOTEST	0	0	0	0	1	1	no
Glyma0024s00260	Glyma0024s00260	Glyma0024s00260	scaffold_24:201620-211808	ws82-0	ws82-14	OK	3.58606	6.19499	0.788702	-1.57573	0.115088	0.513486	no
Glyma0028s00210	Glyma0028s00210	Glyma0028s00210	scaffold_28:233807-247417	ws82-0	ws82-14	OK	18.7958	12.7468	-0.560272	1.19725	0.231209	0.701484	no
Glyma0028s00260	Glyma0028s00260	Glyma0028s00260	scaffold_28:250538-253655	ws82-0	ws82-14	NOTEST	0	0	0	0	1	1	no
Glyma0041s00210	Glyma0041s00210	Glyma0041s00210	scaffold_41:27189-31640	ws82-0	ws82-14	OK	1.24083	4.16347	1.74648	-3.37588	0.000735791	0.0186682	yes
Glyma0041s00225	Glyma0041s00225	Glyma0041s00225	scaffold_41:41035-42513	ws82-0	ws82-14	NOTEST	0	0	0	0	1	1	no
Glyma0041s00240	Glyma0041s00240	Glyma0041s00240	scaffold_41:45959-49258	ws82-0	ws82-14	OK	25.0357	26.8705	0.102037	-0.229923	0.818151	0.979116	no
Glyma0041s00260	Glyma0041s00260	Glyma0041s00260	scaffold_41:61732-66813	ws82-0	ws82-14	OK	0.785321	3.27455	2.05994	-3.19018	0.00142186	0.0307029	yes
Glyma0041s00271	Glyma0041s00271	Glyma0041s00271	scaffold_41:70024-73638	ws82-0	ws82-14	OK	2.60466	2.3741	-0.133714	0.235875	0.81353	0.978544	no
Glyma0041s00280	Glyma0041s00280	Glyma0041s00280	scaffold_41:74056-78241	ws82-0	ws82-14	OK	4.42366	9.24976	1.06417	-2.1298	0.0331884	0.254608	no
Glyma0041s00290	Glyma0041s00290	Glyma0041s00290	scaffold_41:85372-94695	ws82-0	ws82-14	OK	3.92256	3.4782	-0.173457	0.356986	0.721103	0.964414	no
Glyma0041s00300	Glyma0041s00300	Glyma0041s00300	scaffold_41:96315-98827	ws82-0	ws82-14	OK	15.6454	15.5982	-0.00436536	0.0096314	0.992315	0.9991	no
Glyma0041s00310	Glyma0041s00310	Glyma0041s00310	scaffold_41:111899-114096	ws82-0	ws82-14	OK	0.15104	0.617495	2.0315	-1.76235	0.0780106	0.417213	no
Glyma0041s00331	Glyma0041s00331	Glyma0041s00331	scaffold_41:122453-123227	ws82-0	ws82-14	NOTEST	0	0	0	0	1	1	no
Glyma0041s00350	Glyma0041s00350	Glyma0041s00350	scaffold_41:149673-152360	ws82-0	ws82-14	NOTEST	0.131848	0.0402599	-1.71146	1.01787	0.308739	1	no
Glyma0041s00360	Glyma0041s00360	Glyma0041s00360	scaffold_41:165449-171887	ws82-0	ws82-14	NOTEST	0.0277296	0	-1.79769e+308	-1.79769e+308	0.27578	1	no
Glyma0041s50	Glyma0041s50	Glyma0041s50	scaffold_41:4320-9458	ws82-0	ws82-14	NOTEST	0.13678	0.35859	1.39048	-1.76	0.0784082	1	no
Glyma0042s100	Glyma0042s100	Glyma0042s100	scaffold_42:281628-284115	ws82-0	ws82-14	NOTEST	0.42652	0.353236	-0.27198	0.225155	0.821859	1	no
Glyma0042s50	Glyma0042s50	Glyma0042s50	scaffold_42:265872-271658	ws82-0	ws82-14	NOTEST	0	0	0	0	1	1	no
Glyma0048s00220	Glyma0048s00220	Glyma0048s00220	scaffold_48:756-13042	ws82-0	ws82-14	NOTEST	0	0	0	0	1	1	no
Glyma0048s00230	Glyma0048s00230	Glyma0048s00230	scaffold_48:13316-18869	ws82-0	ws82-14	OK	0.312731	2.60684	3.05931	-0.60904	0.542498	0.911095	no
Glyma0048s00240	Glyma0048s00240	Glyma0048s00240	scaffold_48:13316-18869	ws82-0	ws82-14	OK	2.02827	3.11498	0.618971	-1.22859	0.219227	0.68764	no
Glyma0048s00250	Glyma0048s00250	Glyma0048s00250	scaffold_48:24012-27245	ws82-0	ws82-14	OK	30.3575	39.1431	0.366708	-0.816798	0.414044	0.855964	no
Glyma0048s00260	Glyma0048s00260	Glyma0048s00260	scaffold_48:30256-31906	ws82-0	ws82-14	OK	0.526231	0.893494	0.763761	-1.02846	0.303735	0.778256	no
Glyma0048s00270	Glyma0048s00270	Glyma0048s00270	scaffold_48:32191-38154	ws82-0	ws82-14	OK	8.32842	4.84935	-0.780251	1.66831	0.0952534	0.463829	no
Glyma0048s00280	Glyma0048s00280	Glyma0048s00280	scaffold_48:41005-46815	ws82-0	ws82-14	OK	6.21311	8.71612	0.488371	-1.02597	0.304905	0.779266	no
Glyma0048s00290	Glyma0048s00290	Glyma0048s00290	scaffold_48:51746-58457	ws82-0	ws82-14	OK	14.8597	16.0088	0.107456	-0.232683	0.816008	0.978993	no
Glyma0048s00300	Glyma0048s00300	Glyma0048s00300	scaffold_48:62047-65487	ws82-0	ws82-14	OK	70.9642	34.0585	-1.05908	2.09292	0.0363564	0.268567	no
Glyma0048s00305	Glyma0048s00305	Glyma0048s00305	scaffold_48:62047-65487	ws82-0	ws82-14	OK	6.08082	2.21708	-1.45561	0.754245	0.450702	0.87447	no
Glyma0048s00310	Glyma0048s00310	Glyma0048s00310	scaffold_48:73905-75284	ws82-0	ws82-14	NOTEST	0.107421	0.284972	1.40754	-1.48365	0.137903	1	no
Glyma0048s00320	Glyma0048s00320	Glyma0048s00320	scaffold_48:78264-89175	ws82-0	ws82-14	OK	1.2307	2.27874	0.888762	-1.43732	0.150626	0.585739	no
Glyma0048s00330	Glyma0048s00330	Glyma0048s00330	scaffold_48:92831-93821	ws82-0	ws82-14	OK	22.9165	26.574	0.213634	-0.479086	0.631877	0.941134	no
Glyma0048s00340	Glyma0048s00340	Glyma0048s00340	scaffold_48:93959-105291	ws82-0	ws82-14	OK	3.28108	2.80167	-0.227886	0.508507	0.611098	0.934265	no
Glyma0048s00350	Glyma0048s00350	Glyma0048s00350	scaffold_48:115208-118892	ws82-0	ws82-14	NOTEST	0.034676	0	-1.79769e+308	-1.79769e+308	0.155783	1	no
Glyma0048s50	Glyma0048s50	Glyma0048s50	scaffold_48:756-13042	ws82-0	ws82-14	OK	0.632294	0.571104	-0.146842	0.207519	0.835605	0.981185	no
Glyma0053s100	Glyma0053s100	Glyma0053s100	scaffold_53:40277-44576	ws82-0	ws82-14	NOTEST	0	0	0	0	1	1	no
Glyma0053s150	Glyma0053s150	Glyma0053s150	scaffold_53:60537-64721	ws82-0	ws82-14	NOTEST	0	0	0	0	1	1	no
Glyma0053s200	Glyma0053s200	Glyma0053s200	scaffold_53:96299-97317	ws82-0	ws82-14	NOTEST	0	0	0	0	1	1	no
Glyma0053s50	Glyma0053s50	Glyma0053s50	scaffold_53:1663-6177	ws82-0	ws82-14	NOTEST	0	0	0	0	1	1	no
Glyma0057s100	Glyma0057s100	Glyma0057s100	scaffold_57:113347-115364	ws82-0	ws82-14	OK	0.461767	0.531793	0.203702	-0.171726	0.863653	0.984907	no
Glyma0057s50	Glyma0057s50	Glyma0057s50	scaffold_57:98459-99986	ws82-0	ws82-14	NOTEST	0	0	0	0	1	1	no
Glyma0060s00220	Glyma0060s00220	Glyma0060s00220	scaffold_60:12548-13243	ws82-0	ws82-14	NOTEST	0	0	0	0	1	1	no
Glyma0060s00320	Glyma0060s00320	Glyma0060s00320	scaffold_60:67387-68707	ws82-0	ws82-14	NOTEST	0	0	0	0	1	1	no
Glyma0060s00370	Glyma0060s00370	Glyma0060s00370	scaffold_60:104356-106210	ws82-0	ws82-14	NOTEST	0	0	0	0	1	1	no
Glyma0066s50	Glyma0066s50	Glyma0066s50	scaffold_66:161914-164286	ws82-0	ws82-14	NOTEST	0	0	0	0	1	1	no
Glyma0067s50	Glyma0067s50	Glyma0067s50	scaffold_67:44433-45302	ws82-0	ws82-14	NOTEST	0	0	0	0	1	1	no
Glyma0070s50	Glyma0070s50	Glyma0070s50	scaffold_70:35574-40055	ws82-0	ws82-14	OK	2.49711	2.01105	-0.312315	0.490635	0.623685	0.938483	no
Glyma0079s00200	Glyma0079s00200	Glyma0079s00200	scaffold_79:9482-9737	ws82-0	ws82-14	NOTEST	0	0	0	0	1	1	no
Glyma0079s00210	Glyma0079s00210	Glyma0079s00210	scaffold_79:16304-17051	ws82-0	ws82-14	OK	2.03024	7.66855	1.9173	-2.92037	0.0034962	0.0584628	no
Glyma0079s00220	Glyma0079s00220	Glyma0079s00220	scaffold_79:17736-18009	ws82-0	ws82-14	OK	0.440433	3.00717	2.77141	-1.28119	0.200127	0.660973	no
Glyma0079s00230	Glyma0079s00230	Glyma0079s00230	scaffold_79:18723-19596	ws82-0	ws82-14	NOTEST	0.085184	0.195259	1.19674	-0.703673	0.481636	1	no
Glyma0079s00240	Glyma0079s00240	Glyma0079s00240	scaffold_79:20660-20912	ws82-0	ws82-14	OK	0.623467	3.84222	2.62355	-1.20454	0.22838	0.698487	no
Glyma0079s00250	Glyma0079s00250	Glyma0079s00250	scaffold_79:20961-21240	ws82-0	ws82-14	OK	0.347541	4.19641	3.5939	-1.69141	0.0907584	0.450336	no
Glyma0079s00261	Glyma0079s00261	Glyma0079s00261	scaffold_79:22053-22326	ws82-0	ws82-14	NOTEST	0	0	0	0	1	1	no
Glyma0079s00270	Glyma0079s00270	Glyma0079s00270	scaffold_79:25288-26862	ws82-0	ws82-14	NOTEST	0.335253	0.378591	0.175387	-0.200832	0.84083	1	no
Glyma0079s00280	Glyma0079s00280	Glyma0079s00280	scaffold_79:27077-28537	ws82-0	ws82-14	NOTEST	0	0	0	0	1	1	no
Glyma0079s00290	Glyma0079s00290	Glyma0079s00290	scaffold_79:30187-34025	ws82-0	ws82-14	NOTEST	0.129594	0.248623	0.939961	-1.0965	0.272859	1	no
Glyma0079s00295	Glyma0079s00295	Glyma0079s00295	scaffold_79:54681-55767	ws82-0	ws82-14	NOTEST	0.0555403	0.218735	1.97757	-1.23038	0.218554	1	no
Glyma0079s00300	Glyma0079s00300	Glyma0079s00300	scaffold_79:56320-57461	ws82-0	ws82-14	NOTEST	0	0	0	0	1	1	no
Glyma0079s00311	Glyma0079s00311	Glyma0079s00311	scaffold_79:123336-123591	ws82-0	ws82-14	NOTEST	0	0	0	0	1	1	no
Glyma0079s00320	Glyma0079s00320	Glyma0079s00320	scaffold_79:127744-128017	ws82-0	ws82-14	NOTEST	0	0	0	0	1	1	no
Glyma0079s00330	Glyma0079s00330	Glyma0079s00330	scaffold_79:128776-129055	ws82-0	ws82-14	OK	0.234939	0.92074	1.97051	-0.70967	0.477909	0.887083	no
Glyma0079s00340	Glyma0079s00340	Glyma0079s00340	scaffold_79:161645-161951	ws82-0	ws82-14	NOTEST	0	0	0	0	1	1	no
Glyma0079s00350	Glyma0079s00350	Glyma0079s00350	scaffold_79:164291-164540	ws82-0	ws82-14	OK	0.205866	1.49022	2.85575	-0.763597	0.445107	0.872163	no
Glyma0079s00360	Glyma0079s00360	Glyma0079s00360	scaffold_79:165133-166200	ws82-0	ws82-14	OK	0.497361	1.5864	1.67339	-2.02315	0.0430581	0.2954	no
Glyma0079s00370	Glyma0079s00370	Glyma0079s00370	scaffold_79:167220-167502	ws82-0	ws82-14	OK	0.415419	0.814516	0.971376	-0.389653	0.696793	0.958319	no
Glyma0080s50	Glyma0080s50	Glyma0080s50	scaffold_80:33970-43733	ws82-0	ws82-14	NOTEST	0	0	0	0	1	1	no
Glyma0084s00210	Glyma0084s00210	Glyma0084s00210	scaffold_84:12274-20446	ws82-0	ws82-14	OK	176.233	164.119	-0.102748	0.201673	0.840172	0.981917	no
Glyma0084s00230	Glyma0084s00230	Glyma0084s00230	scaffold_84:53420-54224	ws82-0	ws82-14	NOTEST	0	0	0	0	1	1	no
Glyma0086s00200	Glyma0086s00200	Glyma0086s00200	scaffold_86:18942-19924	ws82-0	ws82-14	NOTEST	0	0	0	0	1	1	no
Glyma0086s00250	Glyma0086s00250	Glyma0086s00250	scaffold_86:40393-43241	ws82-0	ws82-14	NOTEST	0	0	0	0	1	1	no
Glyma0086s00300	Glyma0086s00300	Glyma0086s00300	scaffold_86:91106-93419	ws82-0	ws82-14	NOTEST	0	0	0	0	1	1	no
Glyma0090s00200	Glyma0090s00200	Glyma0090s00200	scaffold_90:4631-8816	ws82-0	ws82-14	NOTEST	0.278558	0.38404	0.463277	-0.627107	0.530589	1	no
Glyma0090s00250	Glyma0090s00250	Glyma0090s00250	scaffold_90:22827-24762	ws82-0	ws82-14	OK	0.877422	0.514815	-0.769217	1.01725	0.309036	0.782212	no
Glyma0090s00300	Glyma0090s00300	Glyma0090s00300	scaffold_90:24885-25615	ws82-0	ws82-14	OK	4.35368	2.18612	-0.993865	1.31574	0.188262	0.644163	no
Glyma0090s00350	Glyma0090s00350	Glyma0090s00350	scaffold_90:44125-48952	ws82-0	ws82-14	OK	0.65096	0.18033	-1.85193	2.5811	0.0098486	0.116741	no
Glyma0091s00230	Glyma0091s00230	Glyma0091s00230	scaffold_91:29255-30661	ws82-0	ws82-14	NOTEST	0	0	0	0	1	1	no
Glyma0092s00200	Glyma0092s00200	Glyma0092s00200	scaffold_92:4798-6418	ws82-0	ws82-14	OK	0.777048	1.07767	0.471841	-0.648995	0.516342	0.899872	no
Glyma0092s00210	Glyma0092s00210	Glyma0092s00210	scaffold_92:9477-13080	ws82-0	ws82-14	OK	2.16519	3.7515	0.792973	-1.27555	0.202115	0.663391	no
Glyma0092s00230	Glyma0092s00230	Glyma0092s00230	scaffold_92:31216-33044	ws82-0	ws82-14	OK	81.0775	45.0384	-0.848146	1.79354	0.0728859	0.402781	no
Glyma0092s00240	Glyma0092s00240	Glyma0092s00240	scaffold_92:54198-55797	ws82-0	ws82-14	OK	28.4644	34.1326	0.261991	-0.574602	0.565561	0.91958	no
Glyma0096s100	Glyma0096s100	Glyma0096s100	scaffold_96:83938-84651	ws82-0	ws82-14	NOTEST	0	0	0	0	1	1	no
Glyma0096s50	Glyma0096s50	Glyma0096s50	scaffold_96:24926-29013	ws82-0	ws82-14	NOTEST	0	0	0	0	1	1	no
Glyma0101s00200	Glyma0101s00200	Glyma0101s00200	scaffold_101:409-679	ws82-0	ws82-14	NOTEST	0	0	0	0	1	1	no
Glyma0101s00210	Glyma0101s00210	Glyma0101s00210	scaffold_101:1190-2295	ws82-0	ws82-14	NOTEST	0	0	0	0	1	1	no
Glyma0101s00230	Glyma0101s00230	Glyma0101s00230	scaffold_101:16731-19812	ws82-0	ws82-14	NOTEST	0	0	0	0	1	1	no
Glyma0101s00241	Glyma0101s00241	Glyma0101s00241	scaffold_101:20750-20975	ws82-0	ws82-14	NOTEST	0	0	0	0	1	1	no
Glyma0101s00251	Glyma0101s00251	Glyma0101s00251	scaffold_101:42209-42999	ws82-0	ws82-14	NOTEST	0	0	0	0	1	1	no
Glyma0101s00260	Glyma0101s00260	Glyma0101s00260	scaffold_101:49116-50221	ws82-0	ws82-14	NOTEST	0	0	0	0	1	1	no
Glyma0103s100	Glyma0103s100	Glyma0103s100	scaffold_103:35985-36595	ws82-0	ws82-14	NOTEST	0.326447	0.411324	0.333427	-0.288951	0.772619	1	no
Glyma0103s50	Glyma0103s50	Glyma0103s50	scaffold_103:19207-24805	ws82-0	ws82-14	NOTEST	0.307259	0.100302	-1.6151	0.862368	0.388485	1	no
Glyma0120s50	Glyma0120s50	Glyma0120s50	scaffold_120:55294-60491	ws82-0	ws82-14	NOTEST	0.00599982	0	-1.79769e+308	-1.79769e+308	0.451584	1	no
Glyma0121s00200	Glyma0121s00200	Glyma0121s00200	scaffold_121:11730-14225	ws82-0	ws82-14	NOTEST	0	0	0	0	1	1	no
Glyma0121s00230	Glyma0121s00230	Glyma0121s00230	scaffold_121:28095-29760	ws82-0	ws82-14	NOTEST	0	0	0	0	1	1	no
Glyma0121s00240	Glyma0121s00240	Glyma0121s00240	scaffold_121:38140-41744	ws82-0	ws82-14	NOTEST	0.0397566	0.0563568	0.503395	-0.295888	0.767316	1	no
Glyma0128s50	Glyma0128s50	Glyma0128s50	scaffold_128:8755-9643	ws82-0	ws82-14	NOTEST	0	0	0	0	1	1	no
Glyma0146s00210	Glyma0146s00210	Glyma0146s00210	scaffold_146:13454-14636	ws82-0	ws82-14	NOTEST	0	0	0	0	1	1	no
Glyma0165s00200	Glyma0165s00200	Glyma0165s00200	scaffold_165:18150-20209	ws82-0	ws82-14	NOTEST	0.0159379	0	-1.79769e+308	-1.79769e+308	0.306438	1	no
Glyma0165s50	Glyma0165s50	Glyma0165s50	scaffold_165:12356-14234	ws82-0	ws82-14	NOTEST	0	0	0	0	1	1	no
Glyma0169s00200	Glyma0169s00200	Glyma0169s00200	scaffold_169:6036-7668	ws82-0	ws82-14	OK	24.8648	21.9269	-0.181399	0.384042	0.700947	0.9588	no
Glyma0169s00210	Glyma0169s00210	Glyma0169s00210	scaffold_169:10271-14284	ws82-0	ws82-14	OK	80.671	106.712	0.403605	-0.819687	0.412394	0.855065	no
Glyma0174s50	Glyma0174s50	Glyma0174s50	scaffold_174:28-832	ws82-0	ws82-14	OK	0.544506	0.241793	-1.17117	0.922728	0.356149	0.820304	no
Glyma0175s50	Glyma0175s50	Glyma0175s50	scaffold_175:15261-16399	ws82-0	ws82-14	NOTEST	0	0	0	0	1	1	no
Glyma0196s00210	Glyma0196s00210	Glyma0196s00210	scaffold_196:12292-15573	ws82-0	ws82-14	NOTEST	0.0935347	0.0548515	-0.769972	0.675002	0.499675	1	no
Glyma0196s130	Glyma0196s130	Glyma0196s130	scaffold_196:9547-9835	ws82-0	ws82-14	NOTEST	0	0	0	0	1	1	no
Glyma0196s50	Glyma0196s50	Glyma0196s50	scaffold_196:6280-7448	ws82-0	ws82-14	NOTEST	0	0	0	0	1	1	no
Glyma01g00210	Glyma01g00210	Glyma01g00210	Gm01:27642-27977	ws82-0	ws82-14	OK	5.27274	2.52227	-1.06383	0.597893	0.549911	0.915107	no
Glyma01g00241	Glyma01g00241	Glyma01g00241	Gm01:28504-30546	ws82-0	ws82-14	NOTEST	0.229632	0.221568	-0.0515778	0.0521554	0.958405	1	no
Glyma01g00270	Glyma01g00270	Glyma01g00270	Gm01:51480-61502	ws82-0	ws82-14	NOTEST	0.0837198	0.113212	0.435385	-0.330749	0.740834	1	no
Glyma01g00280	Glyma01g00280	Glyma01g00280	Gm01:61964-63428	ws82-0	ws82-14	NOTEST	0	0	0	0	1	1	no
Glyma01g00291	Glyma01g00291	Glyma01g00291	Gm01:69968-71359	ws82-0	ws82-14	OK	0.667637	0.72123	0.111396	-0.128409	0.897825	0.990672	no
Glyma01g00300	Glyma01g00300	Glyma01g00300	Gm01:90229-96102	ws82-0	ws82-14	OK	3.17372	4.35258	0.455699	-0.956201	0.338971	0.807016	no
Glyma01g00311	Glyma01g00311	Glyma01g00311	Gm01:111565-114809	ws82-0	ws82-14	NOTEST	0	0	0	0	1	1	no
Glyma01g00321	Glyma01g00321	Glyma01g00321	Gm01:116191-128024	ws82-0	ws82-14	OK	3.46801	3.40144	-0.0279623	0.0589237	0.953013	0.997364	no
Glyma01g00341	Glyma01g00341	Glyma01g00341	Gm01:143352-155722	ws82-0	ws82-14	OK	0.511535	0.922805	0.851192	-0.963049	0.335523	0.804902	no
Glyma01g00361	Glyma01g00361	Glyma01g00361	Gm01:157174-157917	ws82-0	ws82-14	NOTEST	0	0.347162	1.79769e+308	1.79769e+308	0.0201927	1	no
Glyma01g00380	Glyma01g00380	Glyma01g00380	Gm01:170678-193544	ws82-0	ws82-14	OK	3.25065	2.89606	-0.166635	0.34147	0.732749	0.966508	no
Glyma01g00400	Glyma01g00400	Glyma01g00400	Gm01:196374-202050	ws82-0	ws82-14	OK	7.64877	8.69848	0.185535	-0.325746	0.744617	0.968817	no
Glyma01g00410	Glyma01g00410	Glyma01g00410	Gm01:205593-226050	ws82-0	ws82-14	OK	12.0166	12.3766	0.0425764	-0.0883211	0.929621	0.994288	no
Glyma01g00420	Glyma01g00420	Glyma01g00420	Gm01:205593-226050	ws82-0	ws82-14	NOTEST	0.342722	0.119966	-1.51442	0.556476	0.577885	1	no
Glyma01g00430	Glyma01g00430	Glyma01g00430	Gm01:227158-238073	ws82-0	ws82-14	OK	16.9954	34.6276	1.02678	-2.15617	0.0310702	0.245499	no
Glyma01g00440	Glyma01g00440	Glyma01g00440	Gm01:244255-244600	ws82-0	ws82-14	NOTEST	0	0	0	0	1	1	no
Glyma01g00450	Glyma01g00450	Glyma01g00450	Gm01:247079-274310	ws82-0	ws82-14	NOTEST	0	0	0	0	1	1	no
Glyma01g00460	Glyma01g00460	Glyma01g00460	Gm01:247079-274310	ws82-0	ws82-14	OK	1.43155	1.44004	0.00852985	-0.0108536	0.99134	0.9991	no
Glyma01g00470	Glyma01g00470	Glyma01g00470	Gm01:247079-274310	ws82-0	ws82-14	OK	5.7448	4.31498	-0.412905	0.732752	0.46371	0.880636	no
Glyma01g00481	Glyma01g00481	Glyma01g00481	Gm01:275569-278576	ws82-0	ws82-14	NOTEST	0	0.0917301	1.79769e+308	1.79769e+308	0.0201927	1	no
Glyma01g00490	Glyma01g00490	Glyma01g00490	Gm01:281068-285680	ws82-0	ws82-14	NOTEST	0	0	0	0	1	1	no
Glyma01g00500	Glyma01g00500	Glyma01g00500	Gm01:285991-288741	ws82-0	ws82-14	OK	118.8	248.953	1.06733	-2.22038	0.0263933	0.220323	no
Glyma01g00510	Glyma01g00510	Glyma01g00510	Gm01:291440-297515	ws82-0	ws82-14	OK	4.90023	3.76307	-0.38094	0.80738	0.419448	0.858921	no
Glyma01g00520	Glyma01g00520	Glyma01g00520	Gm01:303945-308194	ws82-0	ws82-14	OK	3.44955	2.87074	-0.264987	0.440849	0.659322	0.947599	no
Glyma01g00530	Glyma01g00530	Glyma01g00530	Gm01:318581-323172	ws82-0	ws82-14	NOTEST	0	0	0	0	1	1	no
Glyma01g00541	Glyma01g00541	Glyma01g00541	Gm01:329083-331923	ws82-0	ws82-14	OK	1.44473	3.83828	1.40966	-2.14851	0.0316736	0.247812	no
Glyma01g00551	Glyma01g00551	Glyma01g00551	Gm01:333453-334355	ws82-0	ws82-14	NOTEST	0	0	0	0	1	1	no
Glyma01g00560	Glyma01g00560	Glyma01g00560	Gm01:335231-337098	ws82-0	ws82-14	OK	6.63755	4.85809	-0.450264	0.965377	0.334356	0.804549	no
Glyma01g00570	Glyma01g00570	Glyma01g00570	Gm01:339899-343391	ws82-0	ws82-14	OK	18.6793	16.7904	-0.153801	0.341402	0.732801	0.966508	no
Glyma01g00580	Glyma01g00580	Glyma01g00580	Gm01:344017-344620	ws82-0	ws82-14	NOTEST	0	0	0	0	1	1	no
Glyma01g00590	Glyma01g00590	Glyma01g00590	Gm01:346489-350011	ws82-0	ws82-14	OK	3.69955	3.75347	0.0208749	-0.0336869	0.973127	0.997956	no
Glyma01g00600	Glyma01g00600	Glyma01g00600	Gm01:363275-365404	ws82-0	ws82-14	OK	6.44575	10.1865	0.660235	-1.39402	0.163313	0.602695	no
Glyma01g00610	Glyma01g00610	Glyma01g00610	Gm01:369322-375842	ws82-0	ws82-14	OK	8.1867	6.84806	-0.257586	0.402885	0.687033	0.955603	no
Glyma01g00620	Glyma01g00620	Glyma01g00620	Gm01:369322-375842	ws82-0	ws82-14	NOTEST	0.0735321	0.135824	0.885293	-0.195278	0.845176	1	no
Glyma01g00640	Glyma01g00640	Glyma01g00640	Gm01:380015-381810	ws82-0	ws82-14	OK	5.41784	7.67355	0.502178	-1.0836	0.278543	0.752824	no
Glyma01g00660	Glyma01g00660	Glyma01g00660	Gm01:384777-386898	ws82-0	ws82-14	NOTEST	0.106051	0	-1.79769e+308	-1.79769e+308	0.155783	1	no
Glyma01g00670	Glyma01g00670	Glyma01g00670	Gm01:387855-391000	ws82-0	ws82-14	OK	0.968838	2.08651	1.10676	-1.81359	0.0697415	0.393768	no
Glyma01g00680	Glyma01g00680	Glyma01g00680	Gm01:391564-396978	ws82-0	ws82-14	OK	2.70934	2.57309	-0.074439	0.134096	0.893327	0.989867	no
Glyma01g00690	Glyma01g00690	Glyma01g00690	Gm01:397383-400581	ws82-0	ws82-14	OK	4.46434	9.06926	1.02254	-1.80661	0.0708232	0.396966	no
Glyma01g00700	Glyma01g00700	Glyma01g00700	Gm01:411261-413277	ws82-0	ws82-14	NOTEST	0	0.0296473	1.79769e+308	1.79769e+308	0.162559	1	no
Glyma01g00710	Glyma01g00710	Glyma01g00710	Gm01:415321-417655	ws82-0	ws82-14	OK	1.56593	2.55973	0.708973	-1.02643	0.304689	0.779029	no
Glyma01g00720	Glyma01g00720	Glyma01g00720	Gm01:418762-423973	ws82-0	ws82-14	OK	2.12836	2.13173	0.00228224	-0.00474363	0.996215	0.999442	no
Glyma01g00730	Glyma01g00730	Glyma01g00730	Gm01:425499-427881	ws82-0	ws82-14	OK	9.09132	10.7115	0.236594	-0.456076	0.648335	0.945512	no
Glyma01g00740	Glyma01g00740	Glyma01g00740	Gm01:429463-430748	ws82-0	ws82-14	OK	48.6042	43.6352	-0.155588	0.3422	0.7322	0.966495	no
Glyma01g00750	Glyma01g00750	Glyma01g00750	Gm01:431176-433062	ws82-0	ws82-14	NOTEST	0.163288	0.150765	-0.115111	0.1164	0.907335	1	no
Glyma01g00760	Glyma01g00760	Glyma01g00760	Gm01:434429-437563	ws82-0	ws82-14	OK	27.2033	21.6051	-0.33241	0.690862	0.489652	0.8912	no
Glyma01g00771	Glyma01g00771	Glyma01g00771	Gm01:438390-439678	ws82-0	ws82-14	OK	1.79151	6.17903	1.7862	-2.81327	0.00490403	0.073637	no
Glyma01g00780	Glyma01g00780	Glyma01g00780	Gm01:441913-445194	ws82-0	ws82-14	NOTEST	0.0896122	0.369745	2.04476	-1.73012	0.0836095	1	no
Glyma01g00790	Glyma01g00790	Glyma01g00790	Gm01:446961-452958	ws82-0	ws82-14	NOTEST	0.0715039	0.064085	-0.158035	0.151578	0.87952	1	no
Glyma01g00805	Glyma01g00805	Glyma01g00805	Gm01:457615-459673	ws82-0	ws82-14	NOTEST	0	0.0764617	1.79769e+308	1.79769e+308	0.082025	1	no
Glyma01g00820	Glyma01g00820	Glyma01g00820	Gm01:464651-466721	ws82-0	ws82-14	OK	15.0078	7.01644	-1.0969	2.44997	0.0142869	0.14977	no
Glyma01g00840	Glyma01g00840	Glyma01g00840	Gm01:505341-508290	ws82-0	ws82-14	NOTEST	0.109474	0.0870992	-0.329858	0.190366	0.849022	1	no
Glyma01g00850	Glyma01g00850	Glyma01g00850	Gm01:512025-517266	ws82-0	ws82-14	OK	4.85005	2.47555	-0.970252	2.03046	0.0423097	0.292413	no
Glyma01g00860	Glyma01g00860	Glyma01g00860	Gm01:518296-520313	ws82-0	ws82-14	OK	15.7051	16.2458	0.0488269	-0.096271	0.923305	0.99374	no
Glyma01g00870	Glyma01g00870	Glyma01g00870	Gm01:523808-529106	ws82-0	ws82-14	OK	34.9325	23.0234	-0.601469	1.20678	0.227516	0.698038	no
Glyma01g00880	Glyma01g00880	Glyma01g00880	Gm01:544620-550750	ws82-0	ws82-14	OK	0.641906	0.55492	-0.210083	0.255817	0.798092	0.975928	no
Glyma01g00890	Glyma01g00890	Glyma01g00890	Gm01:559624-561661	ws82-0	ws82-14	NOTEST	0.200821	0.417616	1.05627	-1.24856	0.211826	1	no
Glyma01g00900	Glyma01g00900	Glyma01g00900	Gm01:562674-567038	ws82-0	ws82-14	NOTEST	0.0984489	0.0910079	-0.113384	0.0554434	0.955785	1	no
Glyma01g00910	Glyma01g00910	Glyma01g00910	Gm01:567202-572032	ws82-0	ws82-14	NOTEST	0.425316	0.312351	-0.445366	0.584301	0.559018	1	no
Glyma01g00920	Glyma01g00920	Glyma01g00920	Gm01:576437-580149	ws82-0	ws82-14	NOTEST	0	0	0	0	1	1	no
Glyma01g00930	Glyma01g00930	Glyma01g00930	Gm01:585699-587056	ws82-0	ws82-14	OK	12.7127	40.6004	1.67522	-3.66071	0.000251522	0.0082671	yes
Glyma01g00940	Glyma01g00940	Glyma01g00940	Gm01:588160-598604	ws82-0	ws82-14	OK	22.0113	10.6785	-1.04354	2.33172	0.0197154	0.18422	no
Glyma01g00950	Glyma01g00950	Glyma01g00950	Gm01:598924-599925	ws82-0	ws82-14	OK	28.0204	5.08299	-2.46273	5.04376	4.56471e-07	5.0777e-05	yes
Glyma01g00960	Glyma01g00960	Glyma01g00960	Gm01:604191-612760	ws82-0	ws82-14	OK	5.3735	4.65205	-0.207996	0.436933	0.66216	0.948618	no
Glyma01g00975	Glyma01g00975	Glyma01g00975	Gm01:613982-641941	ws82-0	ws82-14	OK	1.19347	0.71584	-0.737458	1.27726	0.20151	0.662531	no
Glyma01g00990	Glyma01g00990	Glyma01g00990	Gm01:643213-651111	ws82-0	ws82-14	OK	2.79156	2.01134	-0.472915	1.01442	0.310381	0.782709	no
Glyma01g01000	Glyma01g01000	Glyma01g01000	Gm01:652294-658333	ws82-0	ws82-14	OK	16.5709	21.2507	0.358856	-0.758253	0.448299	0.873053	no
Glyma01g01010	Glyma01g01010	Glyma01g01010	Gm01:663901-668594	ws82-0	ws82-14	NOTEST	0.0509526	0.0732223	0.523128	-0.232106	0.816455	1	no
Glyma01g01020	Glyma01g01020	Glyma01g01020	Gm01:670826-674335	ws82-0	ws82-14	OK	35.5476	33.4843	-0.0862691	0.190681	0.848775	0.983641	no
Glyma01g01030	Glyma01g01030	Glyma01g01030	Gm01:681416-683646	ws82-0	ws82-14	NOTEST	0.027569	0.207296	2.91057	-1.86599	0.0620427	1	no
Glyma01g01050	Glyma01g01050	Glyma01g01050	Gm01:706987-708399	ws82-0	ws82-14	NOTEST	0.115146	0.0299908	-1.94087	1.18429	0.236298	1	no
Glyma01g01060	Glyma01g01060	Glyma01g01060	Gm01:729658-735082	ws82-0	ws82-14	OK	4.85392	3.96447	-0.292024	0.596527	0.550823	0.915435	no
Glyma01g01070	Glyma01g01070	Glyma01g01070	Gm01:735854-740661	ws82-0	ws82-14	NOTEST	0.18455	0.0632652	-1.54452	1.46775	0.142172	1	no
Glyma01g01080	Glyma01g01080	Glyma01g01080	Gm01:741674-745361	ws82-0	ws82-14	OK	0.683194	1.33291	0.964213	-1.63727	0.101573	0.482477	no
Glyma01g01090	Glyma01g01090	Glyma01g01090	Gm01:746504-750472	ws82-0	ws82-14	NOTEST	0.0162266	0.0286824	0.821803	-0.466201	0.641072	1	no
Glyma01g01101	Glyma01g01101	Glyma01g01101	Gm01:752181-756473	ws82-0	ws82-14	NOTEST	0	0	0	0	1	1	no
Glyma01g01110	Glyma01g01110	Glyma01g01110	Gm01:757751-761280	ws82-0	ws82-14	OK	5.83291	3.81861	-0.611169	1.34471	0.178718	0.629353	no
Glyma01g01120	Glyma01g01120	Glyma01g01120	Gm01:762982-771636	ws82-0	ws82-14	NOTEST	0.184715	0.19982	0.113401	-0.138736	0.889659	1	no
Glyma01g01130	Glyma01g01130	Glyma01g01130	Gm01:773986-783534	ws82-0	ws82-14	NOTEST	0	0.0301968	1.79769e+308	1.79769e+308	0.332502	1	no
Glyma01g01140	Glyma01g01140	Glyma01g01140	Gm01:773986-783534	ws82-0	ws82-14	OK	2.6631	2.93324	0.139389	-0.230007	0.818086	0.979116	no
Glyma01g01150	Glyma01g01150	Glyma01g01150	Gm01:786786-790850	ws82-0	ws82-14	OK	0.62537	0.548583	-0.189001	0.24873	0.803569	0.977037	no
Glyma01g01160	Glyma01g01160	Glyma01g01160	Gm01:801794-812173	ws82-0	ws82-14	NOTEST	0.0375249	0	-1.79769e+308	-1.79769e+308	0.0398236	1	no
Glyma01g01165	Glyma01g01165	Glyma01g01165	Gm01:813195-815449	ws82-0	ws82-14	NOTEST	0	0	0	0	1	1	no
Glyma01g01170	Glyma01g01170	Glyma01g01170	Gm01:817680-822876	ws82-0	ws82-14	OK	2.11214	2.7337	0.37215	-0.591224	0.55437	0.916067	no
Glyma01g01180	Glyma01g01180	Glyma01g01180	Gm01:826828-831862	ws82-0	ws82-14	OK	52.184	43.381	-0.266545	0.539447	0.589579	0.926935	no
Glyma01g01190	Glyma01g01190	Glyma01g01190	Gm01:837437-839839	ws82-0	ws82-14	OK	16.452	15.8214	-0.0563844	0.124482	0.900934	0.990991	no
Glyma01g01210	Glyma01g01210	Glyma01g01210	Gm01:841603-854009	ws82-0	ws82-14	NOTEST	0.136908	0.108979	-0.329163	0.364485	0.715496	1	no
Glyma01g01220	Glyma01g01220	Glyma01g01220	Gm01:861697-864316	ws82-0	ws82-14	OK	10.7743	10.5426	-0.0313629	0.0579417	0.953795	0.997364	no
Glyma01g01230	Glyma01g01230	Glyma01g01230	Gm01:864945-873519	ws82-0	ws82-14	OK	2.48628	1.88435	-0.399924	0.811639	0.416999	0.857593	no
Glyma01g01240	Glyma01g01240	Glyma01g01240	Gm01:882373-883583	ws82-0	ws82-14	OK	3.49632	0.78458	-2.15585	3.29146	0.000996687	0.0235688	yes
Glyma01g01251	Glyma01g01251	Glyma01g01251	Gm01:897328-899783	ws82-0	ws82-14	NOTEST	0	0.00501735	1.79769e+308	1.79769e+308	0.337094	1	no
Glyma01g01260	Glyma01g01260	Glyma01g01260	Gm01:901470-902792	ws82-0	ws82-14	OK	81.2148	122.676	0.595035	-1.26632	0.205398	0.668506	no
Glyma01g01270	Glyma01g01270	Glyma01g01270	Gm01:908126-916913	ws82-0	ws82-14	OK	11.3873	8.08951	-0.493307	1.1096	0.267172	0.74255	no
Glyma01g01280	Glyma01g01280	Glyma01g01280	Gm01:919766-925870	ws82-0	ws82-14	OK	1.99701	2.22189	0.153945	-0.319859	0.749076	0.969309	no
Glyma01g01291	Glyma01g01291	Glyma01g01291	Gm01:934414-936646	ws82-0	ws82-14	OK	0.526753	1.75531	1.73652	-2.28285	0.0224393	0.199743	no
Glyma01g01300	Glyma01g01300	Glyma01g01300	Gm01:937313-940538	ws82-0	ws82-14	OK	0.490801	0.349298	-0.490679	0.593639	0.552754	0.915688	no
Glyma01g01310	Glyma01g01310	Glyma01g01310	Gm01:952468-956652	ws82-0	ws82-14	OK	0.557349	1.02546	0.879618	-1.32936	0.183728	0.636662	no
Glyma01g01330	Glyma01g01330	Glyma01g01330	Gm01:959531-963281	ws82-0	ws82-14	OK	17.176	15.9794	-0.104174	0.230165	0.817964	0.979116	no
Glyma01g01340	Glyma01g01340	Glyma01g01340	Gm01:966937-971332	ws82-0	ws82-14	OK	12.1153	13.5212	0.158385	-0.355449	0.722253	0.964414	no
Glyma01g01350	Glyma01g01350	Glyma01g01350	Gm01:972898-978372	ws82-0	ws82-14	OK	1.30199	1.97276	0.599497	-0.884016	0.376688	0.833242	no
Glyma01g01360	Glyma01g01360	Glyma01g01360	Gm01:980271-987366	ws82-0	ws82-14	OK	1.33493	2.97509	1.15617	-2.15785	0.0309398	0.244646	no
Glyma01g01365	Glyma01g01365	Glyma01g01365	Gm01:991596-992349	ws82-0	ws82-14	NOTEST	0.292197	0	-1.79769e+308	-1.79769e+308	0.155783	1	no
Glyma01g01370	Glyma01g01370	Glyma01g01370	Gm01:992662-997177	ws82-0	ws82-14	OK	830.566	665.316	-0.320056	0.477856	0.632753	0.941134	no
Glyma01g01380	Glyma01g01380	Glyma01g01380	Gm01:1000826-1006591	ws82-0	ws82-14	OK	16.6668	27.6059	0.727997	-1.54232	0.122995	0.530105	no
Glyma01g01390	Glyma01g01390	Glyma01g01390	Gm01:1008758-1013501	ws82-0	ws82-14	OK	8.60832	9.00881	0.0656052	-0.147627	0.882637	0.988047	no
Glyma01g01400	Glyma01g01400	Glyma01g01400	Gm01:1018233-1021659	ws82-0	ws82-14	OK	3.34571	3.2232	-0.0538204	0.116684	0.907111	0.992146	no
Glyma01g01410	Glyma01g01410	Glyma01g01410	Gm01:1023044-1025742	ws82-0	ws82-14	OK	58.2098	71.3376	0.2934	-0.650568	0.515325	0.899534	no
Glyma01g01420	Glyma01g01420	Glyma01g01420	Gm01:1028982-1033386	ws82-0	ws82-14	NOTEST	0.0174863	0.0311886	0.834793	-0.47357	0.635807	1	no
Glyma01g01431	Glyma01g01431	Glyma01g01431	Gm01:1035987-1043507	ws82-0	ws82-14	OK	2.07496	1.23683	-0.746435	1.20516	0.228142	0.698219	no
Glyma01g01440	Glyma01g01440	Glyma01g01440	Gm01:1047147-1051040	ws82-0	ws82-14	OK	13.4133	18.1782	0.438546	-0.851008	0.394765	0.844246	no
Glyma01g01450	Glyma01g01450	Glyma01g01450	Gm01:1052601-1053493	ws82-0	ws82-14	OK	0.441594	2.20729	2.32148	-2.71998	0.00652852	0.0894465	no
Glyma01g01460	Glyma01g01460	Glyma01g01460	Gm01:1056819-1061665	ws82-0	ws82-14	OK	6.5923	11.4211	0.792851	-1.73778	0.0822496	0.428664	no
Glyma01g01470	Glyma01g01470	Glyma01g01470	Gm01:1066130-1073350	ws82-0	ws82-14	OK	5.00068	4.47296	-0.160896	0.358384	0.720056	0.964414	no
Glyma01g01480	Glyma01g01480	Glyma01g01480	Gm01:1088031-1090516	ws82-0	ws82-14	OK	24.9527	19.8966	-0.326673	0.722552	0.469955	0.883491	no
Glyma01g01491	Glyma01g01491	Glyma01g01491	Gm01:1091316-1094909	ws82-0	ws82-14	OK	0.858582	0.992264	0.208769	-0.284602	0.775949	0.972265	no
Glyma01g01500	Glyma01g01500	Glyma01g01500	Gm01:1095456-1099007	ws82-0	ws82-14	NOTEST	0	0	0	0	1	1	no
Glyma01g01510	Glyma01g01510	Glyma01g01510	Gm01:1125596-1130365	ws82-0	ws82-14	NOTEST	0.158175	0.168427	0.0906026	-0.0972109	0.922559	1	no
Glyma01g01521	Glyma01g01521	Glyma01g01521	Gm01:1133845-1137317	ws82-0	ws82-14	OK	1.15746	0.742601	-0.640304	0.991318	0.32153	0.792892	no
Glyma01g01530	Glyma01g01530	Glyma01g01530	Gm01:1138207-1139962	ws82-0	ws82-14	NOTEST	0.0544411	0	-1.79769e+308	-1.79769e+308	0.155783	1	no
Glyma01g01550	Glyma01g01550	Glyma01g01550	Gm01:1143928-1150404	ws82-0	ws82-14	OK	0.620206	0.206651	-1.58555	2.0771	0.0377922	0.274033	no
Glyma01g01560	Glyma01g01560	Glyma01g01560	Gm01:1160591-1165098	ws82-0	ws82-14	NOTEST	0.373587	0.164034	-1.18745	1.59435	0.110858	1	no
Glyma01g01570	Glyma01g01570	Glyma01g01570	Gm01:1165649-1171110	ws82-0	ws82-14	OK	0.779608	0.0459408	-4.0849	3.57386	0.000351763	0.0106519	yes
Glyma01g01580	Glyma01g01580	Glyma01g01580	Gm01:1185427-1188776	ws82-0	ws82-14	NOTEST	0	0	0	0	1	1	no
Glyma01g01590	Glyma01g01590	Glyma01g01590	Gm01:1196921-1198375	ws82-0	ws82-14	OK	8.3328	7.1743	-0.215964	0.326947	0.743708	0.968817	no
Glyma01g01601	Glyma01g01601	Glyma01g01601	Gm01:1201663-1205929	ws82-0	ws82-14	OK	11.742	14.14	0.26811	-0.60221	0.547035	0.91378	no
Glyma01g01610	Glyma01g01610	Glyma01g01610	Gm01:1207927-1212597	ws82-0	ws82-14	OK	11.8996	10.4495	-0.187489	0.421968	0.673048	0.951081	no
Glyma01g01620	Glyma01g01620	Glyma01g01620	Gm01:1215172-1220713	ws82-0	ws82-14	OK	1.31987	0.536512	-1.29871	1.72794	0.083999	0.432206	no
Glyma01g01630	Glyma01g01630	Glyma01g01630	Gm01:1224165-1228877	ws82-0	ws82-14	NOTEST	0	0	0	0	1	1	no
Glyma01g01641	Glyma01g01641	Glyma01g01641	Gm01:1231917-1233070	ws82-0	ws82-14	NOTEST	0	0	0	0	1	1	no
Glyma01g01651	Glyma01g01651	Glyma01g01651	Gm01:1235950-1236741	ws82-0	ws82-14	NOTEST	0.145109	0.088446	-0.71427	0.38154	0.702803	1	no
Glyma01g01661	Glyma01g01661	Glyma01g01661	Gm01:1237990-1239189	ws82-0	ws82-14	OK	17.7422	10.5221	-0.753761	0.778038	0.436546	0.867259	no
Glyma01g01671	Glyma01g01671	Glyma01g01671	Gm01:1237990-1239189	ws82-0	ws82-14	OK	4.17843	6.28657	0.589312	-0.468414	0.639488	0.943511	no
Glyma01g01680	Glyma01g01680	Glyma01g01680	Gm01:1241352-1245024	ws82-0	ws82-14	NOTEST	0	0	0	0	1	1	no
Glyma01g01690	Glyma01g01690	Glyma01g01690	Gm01:1252980-1257657	ws82-0	ws82-14	NOTEST	0	0	0	0	1	1	no
Glyma01g01700	Glyma01g01700	Glyma01g01700	Gm01:1273194-1280313	ws82-0	ws82-14	NOTEST	0	0	0	0	1	1	no
Glyma01g01715	Glyma01g01715	Glyma01g01715	Gm01:1283531-1285362	ws82-0	ws82-14	NOTEST	0	0	0	0	1	1	no
Glyma01g01730	Glyma01g01730	Glyma01g01730	Gm01:1289360-1298217	ws82-0	ws82-14	OK	2.56976	1.51154	-0.765616	1.43099	0.152434	0.58899	no
Glyma01g01740	Glyma01g01740	Glyma01g01740	Gm01:1307387-1317730	ws82-0	ws82-14	OK	4.16714	5.88383	0.497697	-1.01732	0.309002	0.782212	no
Glyma01g01750	Glyma01g01750	Glyma01g01750	Gm01:1319394-1322259	ws82-0	ws82-14	OK	3.10191	1.91858	-0.69312	1.41496	0.15708	0.594713	no
Glyma01g01770	Glyma01g01770	Glyma01g01770	Gm01:1332992-1336611	ws82-0	ws82-14	OK	24.3229	13.9149	-0.80568	1.58561	0.112828	0.509864	no
Glyma01g01780	Glyma01g01780	Glyma01g01780	Gm01:1342969-1347966	ws82-0	ws82-14	OK	0.366536	0.591956	0.691537	-0.994696	0.319884	0.791884	no
Glyma01g01790	Glyma01g01790	Glyma01g01790	Gm01:1357260-1362758	ws82-0	ws82-14	NOTEST	0.368281	0.399572	0.117648	-0.145525	0.884296	1	no
Glyma01g01805	Glyma01g01805	Glyma01g01805	Gm01:1377132-1387290	ws82-0	ws82-14	OK	2.46028	3.33431	0.438565	-0.758662	0.448055	0.872992	no
Glyma01g01820	Glyma01g01820	Glyma01g01820	Gm01:1391664-1392341	ws82-0	ws82-14	NOTEST	0	0	0	0	1	1	no
Glyma01g01830	Glyma01g01830	Glyma01g01830	Gm01:1394336-1398687	ws82-0	ws82-14	OK	17.6269	11.9482	-0.560987	1.18441	0.236251	0.707929	no
Glyma01g01840	Glyma01g01840	Glyma01g01840	Gm01:1399714-1403226	ws82-0	ws82-14	OK	3.02841	3.07317	0.0211663	-0.0328046	0.97383	0.997956	no
Glyma01g01850	Glyma01g01850	Glyma01g01850	Gm01:1409321-1416077	ws82-0	ws82-14	OK	1.08055	0.491583	-1.13626	1.82999	0.0672517	0.386402	no
Glyma01g01860	Glyma01g01860	Glyma01g01860	Gm01:1432595-1439227	ws82-0	ws82-14	OK	4.00647	3.02434	-0.405709	0.847575	0.396675	0.845017	no
Glyma01g01875	Glyma01g01875	Glyma01g01875	Gm01:1464340-1468599	ws82-0	ws82-14	OK	4.3634	5.22797	0.260799	-0.492749	0.62219	0.937535	no
Glyma01g01890	Glyma01g01890	Glyma01g01890	Gm01:1483775-1488285	ws82-0	ws82-14	OK	9.88702	7.28364	-0.440877	0.973025	0.330541	0.802135	no
Glyma01g01900	Glyma01g01900	Glyma01g01900	Gm01:1489317-1495820	ws82-0	ws82-14	OK	28.3764	22.6588	-0.324616	0.631339	0.527819	0.904545	no
Glyma01g01910	Glyma01g01910	Glyma01g01910	Gm01:1500824-1504087	ws82-0	ws82-14	OK	106.62	81.8225	-0.381907	0.723354	0.469462	0.883439	no
Glyma01g01920	Glyma01g01920	Glyma01g01920	Gm01:1504880-1510358	ws82-0	ws82-14	NOTEST	0.119457	0.109033	-0.131724	0.146008	0.883915	1	no
Glyma01g01930	Glyma01g01930	Glyma01g01930	Gm01:1511111-1512857	ws82-0	ws82-14	OK	3.06067	3.00543	-0.026277	0.0376545	0.969963	0.997956	no
Glyma01g01940	Glyma01g01940	Glyma01g01940	Gm01:1514417-1515781	ws82-0	ws82-14	OK	58.3447	38.5661	-0.597267	1.32361	0.185633	0.6399	no
Glyma01g01950	Glyma01g01950	Glyma01g01950	Gm01:1520439-1523995	ws82-0	ws82-14	OK	16.4261	11.6435	-0.496458	1.11144	0.26638	0.741422	no
Glyma01g01960	Glyma01g01960	Glyma01g01960	Gm01:1526003-1531395	ws82-0	ws82-14	OK	3.27214	2.46003	-0.411556	0.770722	0.440872	0.870171	no
Glyma01g01970	Glyma01g01970	Glyma01g01970	Gm01:1532782-1536385	ws82-0	ws82-14	OK	0.954578	1.22831	0.363738	-0.43144	0.666149	0.949908	no
Glyma01g01980	Glyma01g01980	Glyma01g01980	Gm01:1537139-1538153	ws82-0	ws82-14	NOTEST	0.0564101	0.0528145	-0.0950183	0.046463	0.962941	1	no
Glyma01g01990	Glyma01g01990	Glyma01g01990	Gm01:1540562-1544363	ws82-0	ws82-14	OK	6.19871	7.2579	0.227583	-0.508019	0.61144	0.934265	no
Glyma01g02020	Glyma01g02020	Glyma01g02020	Gm01:1547972-1555699	ws82-0	ws82-14	LOWDATA	0	0	-1.79769e+308	0	1	1	no
Glyma01g02031	Glyma01g02031	Glyma01g02031	Gm01:1547972-1555699	ws82-0	ws82-14	NOTEST	0.128931	0.0817852	-0.656685	0.744333	0.456675	1	no
Glyma01g02040	Glyma01g02040	Glyma01g02040	Gm01:1558849-1560186	ws82-0	ws82-14	OK	4.00646	3.08319	-0.377902	0.576037	0.56459	0.91958	no
Glyma01g02050	Glyma01g02050	Glyma01g02050	Gm01:1564664-1568931	ws82-0	ws82-14	OK	2.52951	2.19764	-0.202908	0.327979	0.742927	0.968817	no
Glyma01g02060	Glyma01g02060	Glyma01g02060	Gm01:1577696-1587475	ws82-0	ws82-14	OK	8.72217	9.66554	0.148162	-0.330279	0.741189	0.968484	no
Glyma01g02070	Glyma01g02070	Glyma01g02070	Gm01:1596899-1599449	ws82-0	ws82-14	OK	0.57056	0.801699	0.490682	-0.635013	0.52542	0.903673	no
Glyma01g02080	Glyma01g02080	Glyma01g02080	Gm01:1603349-1604459	ws82-0	ws82-14	NOTEST	0	0	0	0	1	1	no
Glyma01g02090	Glyma01g02090	Glyma01g02090	Gm01:1613117-1616592	ws82-0	ws82-14	OK	43.6796	35.672	-0.292169	0.643461	0.519925	0.901083	no
Glyma01g02100	Glyma01g02100	Glyma01g02100	Gm01:1618639-1623534	ws82-0	ws82-14	OK	4.7382	4.71807	-0.006141	0.0133778	0.989326	0.9991	no
Glyma01g02110	Glyma01g02110	Glyma01g02110	Gm01:1626846-1628287	ws82-0	ws82-14	OK	11.7485	9.66058	-0.282299	0.550389	0.582053	0.92477	no
Glyma01g02120	Glyma01g02120	Glyma01g02120	Gm01:1633690-1637207	ws82-0	ws82-14	OK	16.1084	20.7059	0.362229	-0.815729	0.414655	0.856062	no
Glyma01g02130	Glyma01g02130	Glyma01g02130	Gm01:1642576-1643443	ws82-0	ws82-14	NOTEST	0	0	0	0	1	1	no
Glyma01g02140	Glyma01g02140	Glyma01g02140	Gm01:1648084-1649989	ws82-0	ws82-14	NOTEST	0.115349	0.237271	1.04052	-0.886037	0.375598	1	no
Glyma01g02150	Glyma01g02150	Glyma01g02150	Gm01:1653306-1656923	ws82-0	ws82-14	OK	24.5113	21.5328	-0.186916	0.420161	0.674368	0.951624	no
Glyma01g02160	Glyma01g02160	Glyma01g02160	Gm01:1662473-1663732	ws82-0	ws82-14	NOTEST	0	0	0	0	1	1	no
Glyma01g02171	Glyma01g02171	Glyma01g02171	Gm01:1673102-1673545	ws82-0	ws82-14	NOTEST	0	0	0	0	1	1	no
Glyma01g02180	Glyma01g02180	Glyma01g02180	Gm01:1688059-1691046	ws82-0	ws82-14	OK	34.5766	19.5996	-0.818973	1.81251	0.0699075	0.394114	no
Glyma01g02190	Glyma01g02190	Glyma01g02190	Gm01:1721264-1722533	ws82-0	ws82-14	OK	6.90446	6.44675	-0.0989584	0.196082	0.844546	0.982949	no
Glyma01g02200	Glyma01g02200	Glyma01g02200	Gm01:1733389-1734562	ws82-0	ws82-14	OK	6.01584	7.37071	0.293037	-0.604048	0.545812	0.913041	no
Glyma01g02215	Glyma01g02215	Glyma01g02215	Gm01:1735229-1736763	ws82-0	ws82-14	OK	21.0052	81.0234	1.94759	-4.20042	2.6642e-05	0.00136997	yes
Glyma01g02230	Glyma01g02230	Glyma01g02230	Gm01:1744296-1745378	ws82-0	ws82-14	OK	18.6307	23.3781	0.327477	-0.67573	0.499212	0.893638	no
Glyma01g02235	Glyma01g02235	Glyma01g02235	Gm01:1747643-1748703	ws82-0	ws82-14	NOTEST	0	0	0	0	1	1	no
Glyma01g02240	Glyma01g02240	Glyma01g02240	Gm01:1748705-1753242	ws82-0	ws82-14	OK	1.21671	1.26265	0.0534607	-0.0935254	0.925486	0.993813	no
Glyma01g02251	Glyma01g02251	Glyma01g02251	Gm01:1771935-1773875	ws82-0	ws82-14	OK	42.4494	23.5296	-0.851267	1.81616	0.0693456	0.392706	no
Glyma01g02260	Glyma01g02260	Glyma01g02260	Gm01:1781864-1782671	ws82-0	ws82-14	NOTEST	0	0	0	0	1	1	no
Glyma01g02270	Glyma01g02270	Glyma01g02270	Gm01:1782704-1786280	ws82-0	ws82-14	OK	2.06978	3.09382	0.579913	-0.789241	0.429971	0.863883	no
Glyma01g02280	Glyma01g02280	Glyma01g02280	Gm01:1788990-1791158	ws82-0	ws82-14	OK	7.6282	7.09583	-0.10437	0.230264	0.817886	0.979116	no
Glyma01g02290	Glyma01g02290	Glyma01g02290	Gm01:1803011-1804370	ws82-0	ws82-14	OK	4.61258	4.86851	0.0779049	-0.157782	0.874629	0.986817	no
Glyma01g02295	Glyma01g02295	Glyma01g02295	Gm01:1813531-1816390	ws82-0	ws82-14	NOTEST	0	0	0	0	1	1	no
Glyma01g02300	Glyma01g02300	Glyma01g02300	Gm01:1817115-1820935	ws82-0	ws82-14	NOTEST	0.27625	0.375707	0.443636	-0.530986	0.595429	1	no
Glyma01g02310	Glyma01g02310	Glyma01g02310	Gm01:1822915-1823629	ws82-0	ws82-14	NOTEST	0	0	0	0	1	1	no
Glyma01g02321	Glyma01g02321	Glyma01g02321	Gm01:1825753-1835393	ws82-0	ws82-14	OK	11.4942	8.8399	-0.378801	0.80309	0.421922	0.860217	no
Glyma01g02330	Glyma01g02330	Glyma01g02330	Gm01:1838125-1845872	ws82-0	ws82-14	OK	1.00311	1.19075	0.247392	-0.424615	0.671118	0.950603	no
Glyma01g02340	Glyma01g02340	Glyma01g02340	Gm01:1865275-1868142	ws82-0	ws82-14	OK	2.62096	6.11582	1.22245	-2.6558	0.00791206	0.102033	no
Glyma01g02350	Glyma01g02350	Glyma01g02350	Gm01:1886187-1890464	ws82-0	ws82-14	OK	8.59358	8.79814	0.0339391	-0.0714772	0.943018	0.995823	no
Glyma01g02360	Glyma01g02360	Glyma01g02360	Gm01:1905414-1906471	ws82-0	ws82-14	OK	1.29088	1.25309	-0.0428647	0.057803	0.953906	0.997364	no
Glyma01g02380	Glyma01g02380	Glyma01g02380	Gm01:1929549-1932204	ws82-0	ws82-14	OK	0.937099	1.28104	0.451045	-0.730417	0.465135	0.880985	no
Glyma01g02390	Glyma01g02390	Glyma01g02390	Gm01:1940680-1942652	ws82-0	ws82-14	OK	0.0952074	0.787273	3.04772	-2.61912	0.00881563	0.108833	no
Glyma01g02400	Glyma01g02400	Glyma01g02400	Gm01:1969464-1975586	ws82-0	ws82-14	OK	114.481	150.581	0.395434	-0.645106	0.518858	0.900857	no
Glyma01g02420	Glyma01g02420	Glyma01g02420	Gm01:1977639-1982632	ws82-0	ws82-14	OK	5.22916	3.22401	-0.697725	1.41468	0.157164	0.594785	no
Glyma01g02435	Glyma01g02435	Glyma01g02435	Gm01:1989327-1993130	ws82-0	ws82-14	NOTEST	0	0	0	0	1	1	no
Glyma01g02451	Glyma01g02451	Glyma01g02451	Gm01:1998300-2009388	ws82-0	ws82-14	NOTEST	0.0150266	0.079173	2.39749	-0.614334	0.538995	1	no
Glyma01g02465	Glyma01g02465	Glyma01g02465	Gm01:1998300-2009388	ws82-0	ws82-14	OK	7.71305	5.29313	-0.543181	0.818544	0.413047	0.855381	no
Glyma01g02480	Glyma01g02480	Glyma01g02480	Gm01:2010099-2018636	ws82-0	ws82-14	OK	22.6319	22.0128	-0.0400124	0.0874771	0.930292	0.994398	no
Glyma01g02510	Glyma01g02510	Glyma01g02510	Gm01:2033797-2034792	ws82-0	ws82-14	NOTEST	0.142432	0.0636508	-1.16203	0.653082	0.513703	1	no
Glyma01g02525	Glyma01g02525	Glyma01g02525	Gm01:2038298-2054214	ws82-0	ws82-14	NOTEST	0	0	0	0	1	1	no
Glyma01g02540	Glyma01g02540	Glyma01g02540	Gm01:2065426-2066242	ws82-0	ws82-14	NOTEST	0	0	0	0	1	1	no
Glyma01g02550	Glyma01g02550	Glyma01g02550	Gm01:2067340-2068207	ws82-0	ws82-14	NOTEST	0	0	0	0	1	1	no
Glyma01g02560	Glyma01g02560	Glyma01g02560	Gm01:2089449-2097520	ws82-0	ws82-14	NOTEST	0	0.0191858	1.79769e+308	1.79769e+308	0.162559	1	no
Glyma01g02570	Glyma01g02570	Glyma01g02570	Gm01:2102150-2107115	ws82-0	ws82-14	OK	5.76661	10.2977	0.836532	-1.79694	0.0723444	0.401553	no
Glyma01g02580	Glyma01g02580	Glyma01g02580	Gm01:2119856-2122838	ws82-0	ws82-14	OK	5.9235	3.1532	-0.909635	1.80138	0.0716435	0.399561	no
Glyma01g02610	Glyma01g02610	Glyma01g02610	Gm01:2137616-2139436	ws82-0	ws82-14	OK	1.21312	0.829067	-0.549162	0.837416	0.402359	0.848647	no
Glyma01g02620	Glyma01g02620	Glyma01g02620	Gm01:2146050-2152449	ws82-0	ws82-14	NOTEST	0.0393977	0.177768	2.17381	-2.18886	0.0286073	1	no
Glyma01g02630	Glyma01g02630	Glyma01g02630	Gm01:2156930-2161301	ws82-0	ws82-14	OK	3.61158	3.99149	0.144295	-0.280469	0.779118	0.973124	no
Glyma01g02640	Glyma01g02640	Glyma01g02640	Gm01:2168404-2173706	ws82-0	ws82-14	OK	9.90706	9.31534	-0.0888492	0.194263	0.84597	0.982949	no
Glyma01g02660	Glyma01g02660	Glyma01g02660	Gm01:2184322-2188837	ws82-0	ws82-14	OK	13.8489	8.88183	-0.640838	1.37037	0.170573	0.614633	no
Glyma01g02670	Glyma01g02670	Glyma01g02670	Gm01:2192165-2194689	ws82-0	ws82-14	OK	3.88361	13.086	1.75256	-3.77951	0.000157136	0.00574188	yes
Glyma01g02691	Glyma01g02691	Glyma01g02691	Gm01:2199760-2201127	ws82-0	ws82-14	OK	0.568345	1.04406	0.877371	-1.09815	0.272138	0.747202	no
Glyma01g02710	Glyma01g02710	Glyma01g02710	Gm01:2204078-2206129	ws82-0	ws82-14	NOTEST	0	0	0	0	1	1	no
Glyma01g02720	Glyma01g02720	Glyma01g02720	Gm01:2204078-2206129	ws82-0	ws82-14	OK	40.0957	53.9485	0.428137	-0.947208	0.343533	0.811009	no
Glyma01g02740	Glyma01g02740	Glyma01g02740	Gm01:2209772-2211864	ws82-0	ws82-14	NOTEST	0.0741811	0.260053	1.80968	-1.78562	0.0741607	1	no
Glyma01g02750	Glyma01g02750	Glyma01g02750	Gm01:2228817-2234268	ws82-0	ws82-14	OK	1.06652	1.30295	0.288873	-0.467808	0.639922	0.943576	no
Glyma01g02760	Glyma01g02760	Glyma01g02760	Gm01:2239126-2244480	ws82-0	ws82-14	NOTEST	0.0770576	0.113812	0.562648	-0.565047	0.572042	1	no
Glyma01g02780	Glyma01g02780	Glyma01g02780	Gm01:2274285-2279870	ws82-0	ws82-14	OK	10.0345	12.3157	0.295526	-0.660989	0.508619	0.896608	no
Glyma01g02790	Glyma01g02790	Glyma01g02790	Gm01:2280412-2286189	ws82-0	ws82-14	OK	0.213494	0.479704	1.16795	-1.32456	0.185316	0.639257	no
Glyma01g02800	Glyma01g02800	Glyma01g02800	Gm01:2289835-2296934	ws82-0	ws82-14	OK	0.619897	0.960252	0.631383	-0.993448	0.320492	0.792152	no
Glyma01g02810	Glyma01g02810	Glyma01g02810	Gm01:2296971-2301386	ws82-0	ws82-14	NOTEST	0.0511811	0.116061	1.1812	-1.24506	0.213109	1	no
Glyma01g02820	Glyma01g02820	Glyma01g02820	Gm01:2307249-2310533	ws82-0	ws82-14	OK	9.14248	9.76859	0.0955638	-0.208554	0.834797	0.981181	no
Glyma01g02830	Glyma01g02830	Glyma01g02830	Gm01:2320650-2323809	ws82-0	ws82-14	NOTEST	0	0	0	0	1	1	no
Glyma01g02840	Glyma01g02840	Glyma01g02840	Gm01:2324547-2332128	ws82-0	ws82-14	OK	21.7178	9.05766	-1.26167	2.69921	0.0069505	0.0933124	no
Glyma01g02850	Glyma01g02850	Glyma01g02850	Gm01:2336135-2340956	ws82-0	ws82-14	OK	53.7644	78.3401	0.543098	-1.03299	0.30161	0.776615	no
Glyma01g02880	Glyma01g02880	Glyma01g02880	Gm01:2360197-2366406	ws82-0	ws82-14	OK	8.86222	6.56502	-0.432868	0.770564	0.440966	0.870171	no
Glyma01g02890	Glyma01g02890	Glyma01g02890	Gm01:2373884-2395585	ws82-0	ws82-14	OK	3.28207	1.84109	-0.834044	1.79465	0.0727097	0.40242	no
Glyma01g02900	Glyma01g02900	Glyma01g02900	Gm01:2398001-2407368	ws82-0	ws82-14	OK	2.03137	1.33276	-0.60803	0.902453	0.366816	0.827194	no
Glyma01g02920	Glyma01g02920	Glyma01g02920	Gm01:2419558-2420449	ws82-0	ws82-14	OK	1.36197	1.19466	-0.189087	0.268854	0.788042	0.974214	no
Glyma01g02930	Glyma01g02930	Glyma01g02930	Gm01:2424756-2426304	ws82-0	ws82-14	NOTEST	0	0.153616	1.79769e+308	1.79769e+308	0.0441598	1	no
Glyma01g02941	Glyma01g02941	Glyma01g02941	Gm01:2426753-2435682	ws82-0	ws82-14	OK	1.93001	1.77768	-0.118617	0.237196	0.812505	0.978544	no
Glyma01g02950	Glyma01g02950	Glyma01g02950	Gm01:2448362-2450139	ws82-0	ws82-14	OK	53.6275	48.0266	-0.15914	0.333738	0.738577	0.968114	no
Glyma01g02963	Glyma01g02963	Glyma01g02963	Gm01:2455817-2458234	ws82-0	ws82-14	NOTEST	0.00452014	0.00515108	0.188507	-0.0369665	0.970512	1	no
Glyma01g02976	Glyma01g02976	Glyma01g02976	Gm01:2465269-2466518	ws82-0	ws82-14	NOTEST	0	0	0	0	1	1	no
Glyma01g02990	Glyma01g02990	Glyma01g02990	Gm01:2477179-2479230	ws82-0	ws82-14	OK	6.44267	4.71237	-0.451206	0.884239	0.376567	0.833126	no
Glyma01g03005	Glyma01g03005	Glyma01g03005	Gm01:2495435-2497366	ws82-0	ws82-14	OK	0.602368	0.420059	-0.520054	0.671481	0.501914	0.893638	no
Glyma01g03020	Glyma01g03020	Glyma01g03020	Gm01:2497579-2500150	ws82-0	ws82-14	OK	13.2307	15.9087	0.265927	-0.585759	0.558037	0.918202	no
Glyma01g03030	Glyma01g03030	Glyma01g03030	Gm01:2522226-2524933	ws82-0	ws82-14	OK	1.56137	1.18172	-0.40192	0.630476	0.528383	0.904611	no
Glyma01g03040	Glyma01g03040	Glyma01g03040	Gm01:2530562-2537849	ws82-0	ws82-14	NOTEST	0.0314293	0.199162	2.66376	-1.69929	0.089265	1	no
Glyma01g03050	Glyma01g03050	Glyma01g03050	Gm01:2543533-2544636	ws82-0	ws82-14	NOTEST	0	0	0	0	1	1	no
Glyma01g03060	Glyma01g03060	Glyma01g03060	Gm01:2551019-2553294	ws82-0	ws82-14	NOTEST	0.0908765	0.273977	1.59207	-1.70348	0.0884781	1	no
Glyma01g03070	Glyma01g03070	Glyma01g03070	Gm01:2585415-2586673	ws82-0	ws82-14	OK	276.519	551.955	0.997173	-1.801	0.0717024	0.399754	no
Glyma01g03090	Glyma01g03090	Glyma01g03090	Gm01:2600263-2605224	ws82-0	ws82-14	OK	4.80245	6.98728	0.54096	-1.16032	0.245919	0.719755	no
Glyma01g03100	Glyma01g03100	Glyma01g03100	Gm01:2633476-2636259	ws82-0	ws82-14	OK	2.34031	6.38961	1.44903	-2.85148	0.00435168	0.0673213	no
Glyma01g03110	Glyma01g03110	Glyma01g03110	Gm01:2667742-2669323	ws82-0	ws82-14	NOTEST	0	0.0650188	1.79769e+308	1.79769e+308	0.0854518	1	no
Glyma01g03120	Glyma01g03120	Glyma01g03120	Gm01:2683531-2686001	ws82-0	ws82-14	OK	4.26852	5.54312	0.376963	-0.730084	0.465339	0.881013	no
Glyma01g03130	Glyma01g03130	Glyma01g03130	Gm01:2686762-2690092	ws82-0	ws82-14	OK	8.05415	5.34865	-0.590559	1.29936	0.19382	0.652443	no
Glyma01g03140	Glyma01g03140	Glyma01g03140	Gm01:2696508-2700015	ws82-0	ws82-14	LOWDATA	0	0	-0.89498	0	1	1	no
Glyma01g03150	Glyma01g03150	Glyma01g03150	Gm01:2696508-2700015	ws82-0	ws82-14	OK	56.1777	30.2098	-0.89498	1.66796	0.0953245	0.463982	no
Glyma01g03160	Glyma01g03160	Glyma01g03160	Gm01:2716401-2724818	ws82-0	ws82-14	OK	5.99028	8.48167	0.501727	-1.01006	0.312465	0.784381	no
Glyma01g03180	Glyma01g03180	Glyma01g03180	Gm01:2725857-2728953	ws82-0	ws82-14	OK	21.6794	16.0085	-0.437487	0.982165	0.326019	0.797287	no
Glyma01g03190	Glyma01g03190	Glyma01g03190	Gm01:2731349-2739464	ws82-0	ws82-14	OK	1.12875	1.9788	0.809902	-1.40898	0.15884	0.597572	no
Glyma01g03200	Glyma01g03200	Glyma01g03200	Gm01:2741979-2744444	ws82-0	ws82-14	NOTEST	0	0	0	0	1	1	no
Glyma01g03210	Glyma01g03210	Glyma01g03210	Gm01:2749285-2751625	ws82-0	ws82-14	OK	0.79861	0.733945	-0.121818	0.188633	0.850381	0.98386	no
Glyma01g03220	Glyma01g03220	Glyma01g03220	Gm01:2752604-2755538	ws82-0	ws82-14	OK	9.88518	7.88736	-0.325725	0.725908	0.467895	0.88252	no
Glyma01g03240	Glyma01g03240	Glyma01g03240	Gm01:2765558-2766634	ws82-0	ws82-14	OK	0.263603	0.508489	0.94785	-0.989966	0.322191	0.793384	no
Glyma01g03260	Glyma01g03260	Glyma01g03260	Gm01:2784884-2792465	ws82-0	ws82-14	OK	768.516	489.138	-0.651834	0.897165	0.369631	0.828314	no
Glyma01g03270	Glyma01g03270	Glyma01g03270	Gm01:2803081-2807357	ws82-0	ws82-14	OK	2.90292	1.60624	-0.853822	1.50602	0.132062	0.549853	no
Glyma01g03281	Glyma01g03281	Glyma01g03281	Gm01:2811064-2811250	ws82-0	ws82-14	NOTEST	0	0	0	0	1	1	no
Glyma01g03290	Glyma01g03290	Glyma01g03290	Gm01:2814292-2814876	ws82-0	ws82-14	NOTEST	0	0	0	0	1	1	no
Glyma01g03301	Glyma01g03301	Glyma01g03301	Gm01:2815679-2817384	ws82-0	ws82-14	NOTEST	0	0	0	0	1	1	no
Glyma01g03310	Glyma01g03310	Glyma01g03310	Gm01:2820282-2822588	ws82-0	ws82-14	NOTEST	0	0	0	0	1	1	no
Glyma01g03321	Glyma01g03321	Glyma01g03321	Gm01:2825602-2830330	ws82-0	ws82-14	NOTEST	0	0	0	0	1	1	no
Glyma01g03330	Glyma01g03330	Glyma01g03330	Gm01:2836050-2840937	ws82-0	ws82-14	OK	8.28012	6.67405	-0.311091	0.683899	0.494039	0.89256	no
Glyma01g03340	Glyma01g03340	Glyma01g03340	Gm01:2843206-2846996	ws82-0	ws82-14	NOTEST	0	0.043168	1.79769e+308	1.79769e+308	0.162559	1	no
Glyma01g03360	Glyma01g03360	Glyma01g03360	Gm01:2857640-2860816	ws82-0	ws82-14	OK	23.0342	5.86389	-1.97385	3.84967	0.000118275	0.00466031	yes
Glyma01g03371	Glyma01g03371	Glyma01g03371	Gm01:2868081-2871591	ws82-0	ws82-14	NOTEST	0.226868	0.0260395	-3.12308	1.77196	0.0764004	1	no
Glyma01g03380	Glyma01g03380	Glyma01g03380	Gm01:2872827-2875983	ws82-0	ws82-14	OK	5.50348	6.95912	0.338561	-0.672712	0.50113	0.893638	no
Glyma01g03390	Glyma01g03390	Glyma01g03390	Gm01:2879282-2884236	ws82-0	ws82-14	OK	0.814448	0.686664	-0.246219	0.3603	0.718623	0.964414	no
Glyma01g03400	Glyma01g03400	Glyma01g03400	Gm01:2895941-2899203	ws82-0	ws82-14	NOTEST	0.0354533	0	-1.79769e+308	-1.79769e+308	0.155783	1	no
Glyma01g03410	Glyma01g03410	Glyma01g03410	Gm01:2907608-2911173	ws82-0	ws82-14	NOTEST	0	0	0	0	1	1	no
Glyma01g03420	Glyma01g03420	Glyma01g03420	Gm01:2912689-2918182	ws82-0	ws82-14	OK	2.62977	2.7281	0.0529612	-0.0971026	0.922645	0.993553	no
Glyma01g03430	Glyma01g03430	Glyma01g03430	Gm01:2918596-2922169	ws82-0	ws82-14	OK	2.82885	3.12421	0.143278	-0.233936	0.815035	0.978993	no
Glyma01g03450	Glyma01g03450	Glyma01g03450	Gm01:2932298-2941083	ws82-0	ws82-14	NOTEST	0	0.0336139	1.79769e+308	1.79769e+308	0.162559	1	no
Glyma01g03470	Glyma01g03470	Glyma01g03470	Gm01:2983533-2985063	ws82-0	ws82-14	OK	2.93901	1.92903	-0.607456	0.885384	0.375949	0.832612	no
Glyma01g03480	Glyma01g03480	Glyma01g03480	Gm01:2985878-2990726	ws82-0	ws82-14	OK	1.58892	3.9677	1.32025	-2.46203	0.0138154	0.146078	no
Glyma01g03490	Glyma01g03490	Glyma01g03490	Gm01:2997710-3004125	ws82-0	ws82-14	OK	7.20953	7.16071	-0.00980207	0.0220341	0.982421	0.998875	no
Glyma01g03500	Glyma01g03500	Glyma01g03500	Gm01:3020777-3022182	ws82-0	ws82-14	OK	35.2096	17.1354	-1.03899	2.30731	0.0210373	0.19181	no
Glyma01g03530	Glyma01g03530	Glyma01g03530	Gm01:3043747-3048064	ws82-0	ws82-14	OK	18.0745	13.0524	-0.469644	1.05657	0.290707	0.76599	no
Glyma01g03540	Glyma01g03540	Glyma01g03540	Gm01:3063216-3065991	ws82-0	ws82-14	OK	10.7054	8.80674	-0.281661	0.613347	0.539647	0.909472	no
Glyma01g03550	Glyma01g03550	Glyma01g03550	Gm01:3067764-3073752	ws82-0	ws82-14	OK	23.5708	22.6058	-0.0603082	0.135913	0.89189	0.989792	no
Glyma01g03570	Glyma01g03570	Glyma01g03570	Gm01:3082363-3083185	ws82-0	ws82-14	OK	111.747	86.1727	-0.374931	0.797307	0.425273	0.860984	no
Glyma01g03580	Glyma01g03580	Glyma01g03580	Gm01:3090805-3093412	ws82-0	ws82-14	NOTEST	0.148701	0.134187	-0.148172	0.116336	0.907386	1	no
Glyma01g03590	Glyma01g03590	Glyma01g03590	Gm01:3106546-3108525	ws82-0	ws82-14	OK	10.5135	18.7318	0.833241	-1.68718	0.0915684	0.452638	no
Glyma01g03600	Glyma01g03600	Glyma01g03600	Gm01:3114320-3119083	ws82-0	ws82-14	OK	6.73856	4.52069	-0.575898	1.05364	0.292048	0.767262	no
Glyma01g03610	Glyma01g03610	Glyma01g03610	Gm01:3120584-3124029	ws82-0	ws82-14	OK	25.1901	19.0509	-0.402996	0.905538	0.365181	0.825867	no
Glyma01g03621	Glyma01g03621	Glyma01g03621	Gm01:3124253-3126137	ws82-0	ws82-14	OK	0.458296	0.155439	-1.55994	1.48239	0.138235	0.562224	no
Glyma01g03630	Glyma01g03630	Glyma01g03630	Gm01:3127061-3127831	ws82-0	ws82-14	NOTEST	0	0	0	0	1	1	no
Glyma01g03650	Glyma01g03650	Glyma01g03650	Gm01:3132200-3135385	ws82-0	ws82-14	OK	39.4822	49.3387	0.321516	-0.664652	0.506273	0.895533	no
Glyma01g03661	Glyma01g03661	Glyma01g03661	Gm01:3135687-3141621	ws82-0	ws82-14	NOTEST	0	0.0386052	1.79769e+308	1.79769e+308	0.166461	1	no
Glyma01g03670	Glyma01g03670	Glyma01g03670	Gm01:3144701-3145778	ws82-0	ws82-14	OK	0.394587	1.00515	1.34899	-1.61551	0.106199	0.495118	no
Glyma01g03690	Glyma01g03690	Glyma01g03690	Gm01:3152038-3157769	ws82-0	ws82-14	NOTEST	0	0	0	0	1	1	no
Glyma01g03700	Glyma01g03700	Glyma01g03700	Gm01:3162858-3164334	ws82-0	ws82-14	OK	3.7597	2.24296	-0.745216	1.3717	0.170156	0.61408	no
Glyma01g03710	Glyma01g03710	Glyma01g03710	Gm01:3167711-3172458	ws82-0	ws82-14	OK	10.0974	3.16185	-1.67514	3.13647	0.00170993	0.035193	yes
Glyma01g03720	Glyma01g03720	Glyma01g03720	Gm01:3174000-3185126	ws82-0	ws82-14	OK	54.1095	69.5137	0.361415	-0.722803	0.469801	0.883491	no
Glyma01g03730	Glyma01g03730	Glyma01g03730	Gm01:3187344-3190927	ws82-0	ws82-14	OK	12.1125	11.9738	-0.0166143	0.0356918	0.971528	0.997956	no
Glyma01g03750	Glyma01g03750	Glyma01g03750	Gm01:3193903-3200492	ws82-0	ws82-14	OK	16.2752	12.5367	-0.376525	0.834788	0.403837	0.849331	no
Glyma01g03760	Glyma01g03760	Glyma01g03760	Gm01:3219159-3222449	ws82-0	ws82-14	OK	5.07687	2.48071	-1.03319	2.22035	0.0263951	0.220323	no
Glyma01g03780	Glyma01g03780	Glyma01g03780	Gm01:3233213-3235819	ws82-0	ws82-14	OK	3.24337	2.13984	-0.599992	0.596226	0.551024	0.915435	no
Glyma01g03790	Glyma01g03790	Glyma01g03790	Gm01:3242605-3245458	ws82-0	ws82-14	NOTEST	0.0948379	0.10669	0.169893	-0.175423	0.860747	1	no
Glyma01g03810	Glyma01g03810	Glyma01g03810	Gm01:3249405-3255967	ws82-0	ws82-14	OK	19.2704	16.2416	-0.246688	0.480606	0.630796	0.941134	no
Glyma01g03820	Glyma01g03820	Glyma01g03820	Gm01:3263267-3267637	ws82-0	ws82-14	OK	3.15786	4.58142	0.536847	-1.09715	0.272578	0.747788	no
Glyma01g03830	Glyma01g03830	Glyma01g03830	Gm01:3283632-3286899	ws82-0	ws82-14	OK	5.85164	8.50227	0.539006	-1.12738	0.259584	0.73604	no
Glyma01g03850	Glyma01g03850	Glyma01g03850	Gm01:3312867-3318968	ws82-0	ws82-14	OK	10.0027	1.81277	-2.46411	4.80475	1.54946e-06	0.000136751	yes
Glyma01g03870	Glyma01g03870	Glyma01g03870	Gm01:3327064-3332585	ws82-0	ws82-14	OK	9.3415	1.85908	-2.32906	4.8408	1.29319e-06	0.000117479	yes
Glyma01g03880	Glyma01g03880	Glyma01g03880	Gm01:3348917-3352335	ws82-0	ws82-14	OK	0.519145	3.06283	2.56066	-4.12277	3.74342e-05	0.00180567	yes
Glyma01g03890	Glyma01g03890	Glyma01g03890	Gm01:3359534-3372620	ws82-0	ws82-14	OK	4.05577	4.22901	0.0603448	-0.132435	0.894641	0.989985	no
Glyma01g03900	Glyma01g03900	Glyma01g03900	Gm01:3378305-3380122	ws82-0	ws82-14	NOTEST	0.107645	0.125986	0.226988	-0.204807	0.837723	1	no
Glyma01g03910	Glyma01g03910	Glyma01g03910	Gm01:3381988-3384388	ws82-0	ws82-14	OK	0.168228	0.922486	2.45511	-2.75794	0.00581677	0.0822446	no
Glyma01g03921	Glyma01g03921	Glyma01g03921	Gm01:3390102-3396781	ws82-0	ws82-14	NOTEST	0.254707	0.310086	0.28383	-0.31857	0.750053	1	no
Glyma01g03930	Glyma01g03930	Glyma01g03930	Gm01:3400476-3411080	ws82-0	ws82-14	OK	9.84122	11.817	0.263955	-0.593331	0.55296	0.915688	no
Glyma01g03940	Glyma01g03940	Glyma01g03940	Gm01:3413504-3415979	ws82-0	ws82-14	OK	0.604902	1.66307	1.45908	-2.15373	0.0312616	0.246143	no
Glyma01g03948	Glyma01g03948	Glyma01g03948	Gm01:3423773-3425166	ws82-0	ws82-14	OK	1.15666	1.15829	0.00203517	-0.00254112	0.997972	0.999442	no
Glyma01g03956	Glyma01g03956	Glyma01g03956	Gm01:3431068-3433014	ws82-0	ws82-14	OK	2.85859	1.36568	-1.06569	1.57893	0.114353	0.512649	no
Glyma01g03964	Glyma01g03964	Glyma01g03964	Gm01:3433091-3436594	ws82-0	ws82-14	OK	0.438081	0.528313	0.270193	-0.377721	0.705638	0.961021	no
Glyma01g03972	Glyma01g03972	Glyma01g03972	Gm01:3439667-3441084	ws82-0	ws82-14	NOTEST	0	0	0	0	1	1	no
Glyma01g03980	Glyma01g03980	Glyma01g03980	Gm01:3455191-3461955	ws82-0	ws82-14	NOTEST	0.341955	0.324053	-0.077577	0.113355	0.909749	1	no
Glyma01g04000	Glyma01g04000	Glyma01g04000	Gm01:3487914-3494204	ws82-0	ws82-14	OK	6.52868	3.987	-0.711486	1.59751	0.110152	0.504359	no
Glyma01g04015	Glyma01g04015	Glyma01g04015	Gm01:3502393-3507947	ws82-0	ws82-14	NOTEST	0	0	0	0	1	1	no
Glyma01g04030	Glyma01g04030	Glyma01g04030	Gm01:3513144-3513438	ws82-0	ws82-14	NOTEST	0	0	0	0	1	1	no
Glyma01g04040	Glyma01g04040	Glyma01g04040	Gm01:3514698-3521382	ws82-0	ws82-14	OK	1.06406	1.16645	0.132554	-0.180155	0.857031	0.984556	no
Glyma01g04050	Glyma01g04050	Glyma01g04050	Gm01:3524004-3527778	ws82-0	ws82-14	OK	56.111	56.9068	0.0203181	-0.0444852	0.964518	0.997663	no
Glyma01g04060	Glyma01g04060	Glyma01g04060	Gm01:3533389-3537718	ws82-0	ws82-14	OK	3.40083	6.17339	0.860176	-1.67242	0.0944421	0.461472	no
Glyma01g04070	Glyma01g04070	Glyma01g04070	Gm01:3541049-3543307	ws82-0	ws82-14	OK	10.6414	10.9195	0.0372133	-0.0766239	0.938923	0.995744	no
Glyma01g04080	Glyma01g04080	Glyma01g04080	Gm01:3552334-3560811	ws82-0	ws82-14	OK	0.445205	2.10039	2.23812	-1.43982	0.149917	0.584178	no
Glyma01g04090	Glyma01g04090	Glyma01g04090	Gm01:3552334-3560811	ws82-0	ws82-14	OK	8.60695	6.08151	-0.501073	0.973178	0.330465	0.802102	no
Glyma01g04100	Glyma01g04100	Glyma01g04100	Gm01:3565109-3567816	ws82-0	ws82-14	OK	2.34978	2.71913	0.210621	-0.399725	0.689359	0.956504	no
Glyma01g04107	Glyma01g04107	Glyma01g04107	Gm01:3570498-3572031	ws82-0	ws82-14	OK	0.585995	0.681693	0.218234	-0.264278	0.791565	0.974423	no
Glyma01g04114	Glyma01g04114	Glyma01g04114	Gm01:3573892-3576381	ws82-0	ws82-14	NOTEST	0	0	0	0	1	1	no
Glyma01g04122	Glyma01g04122	Glyma01g04122	Gm01:3576871-3579242	ws82-0	ws82-14	OK	0.548343	0.802496	0.549416	-0.742322	0.457892	0.878382	no
Glyma01g04130	Glyma01g04130	Glyma01g04130	Gm01:3588235-3590927	ws82-0	ws82-14	OK	22.2268	20.1683	-0.140211	0.313887	0.753607	0.969636	no
Glyma01g04140	Glyma01g04140	Glyma01g04140	Gm01:3593852-3595627	ws82-0	ws82-14	OK	4.05905	4.03662	-0.00799282	0.0145984	0.988353	0.9991	no
Glyma01g04151	Glyma01g04151	Glyma01g04151	Gm01:3601850-3604249	ws82-0	ws82-14	OK	1.60918	1.09047	-0.561371	0.870381	0.384092	0.837367	no
Glyma01g04160	Glyma01g04160	Glyma01g04160	Gm01:3614505-3619208	ws82-0	ws82-14	NOTEST	0	0	0	0	1	1	no
Glyma01g04170	Glyma01g04170	Glyma01g04170	Gm01:3622380-3627999	ws82-0	ws82-14	OK	8.80722	17.6171	1.00021	-1.83367	0.066703	0.384719	no
Glyma01g04190	Glyma01g04190	Glyma01g04190	Gm01:3657972-3659933	ws82-0	ws82-14	OK	3.96329	5.29997	0.419283	-0.809826	0.41804	0.857906	no
Glyma01g04200	Glyma01g04200	Glyma01g04200	Gm01:3671722-3676091	ws82-0	ws82-14	NOTEST	0.0499742	0.0289686	-0.786694	0.59429	0.552318	1	no
Glyma01g04210	Glyma01g04210	Glyma01g04210	Gm01:3695969-3699966	ws82-0	ws82-14	LOWDATA	0.279274	0.185862	-0.587448	0	1	1	no
Glyma01g04220	Glyma01g04220	Glyma01g04220	Gm01:3695969-3699966	ws82-0	ws82-14	OK	0.608135	0.0755292	-3.00928	2.66942	0.00759824	0.0992483	no
Glyma01g04230	Glyma01g04230	Glyma01g04230	Gm01:3717479-3721262	ws82-0	ws82-14	OK	7.53939	5.19688	-0.536803	1.15421	0.248414	0.722272	no
Glyma01g04241	Glyma01g04241	Glyma01g04241	Gm01:3734519-3735893	ws82-0	ws82-14	OK	0.261659	0.473724	0.856355	-0.96889	0.3326	0.803569	no
Glyma01g04250	Glyma01g04250	Glyma01g04250	Gm01:3750043-3752379	ws82-0	ws82-14	OK	2.08224	0.218361	-3.25335	4.47354	7.69341e-06	0.000502206	yes
Glyma01g04261	Glyma01g04261	Glyma01g04261	Gm01:3767622-3769840	ws82-0	ws82-14	NOTEST	0	0	0	0	1	1	no
Glyma01g04270	Glyma01g04270	Glyma01g04270	Gm01:3770398-3790851	ws82-0	ws82-14	OK	6.36178	6.57112	0.0467082	-0.0970277	0.922704	0.993553	no
Glyma01g04285	Glyma01g04285	Glyma01g04285	Gm01:3792928-3793735	ws82-0	ws82-14	OK	0.93781	3.01974	1.68706	-2.1248	0.0336033	0.256191	no
Glyma01g04300	Glyma01g04300	Glyma01g04300	Gm01:3800482-3805133	ws82-0	ws82-14	OK	7.52703	4.66734	-0.68948	1.40426	0.160243	0.60002	no
Glyma01g04310	Glyma01g04310	Glyma01g04310	Gm01:3839061-3840278	ws82-0	ws82-14	NOTEST	0	0.367944	1.79769e+308	1.79769e+308	0.0113092	1	no
Glyma01g04320	Glyma01g04320	Glyma01g04320	Gm01:3843990-3851452	ws82-0	ws82-14	OK	10.4348	10.2741	-0.0223875	0.0484163	0.961384	0.997377	no
Glyma01g04330	Glyma01g04330	Glyma01g04330	Gm01:3875178-3876239	ws82-0	ws82-14	OK	0.626814	1.0625	0.761355	-0.756615	0.449281	0.873782	no
Glyma01g04335	Glyma01g04335	Glyma01g04335	Gm01:3875178-3876239	ws82-0	ws82-14	OK	3.99233	0	-1.79769e+308	-1.79769e+308	0.118514	0.520953	no
Glyma01g04340	Glyma01g04340	Glyma01g04340	Gm01:3894968-3896837	ws82-0	ws82-14	OK	0.797148	0.699991	-0.187511	0.263194	0.792401	0.974423	no
Glyma01g04350	Glyma01g04350	Glyma01g04350	Gm01:3901049-3902869	ws82-0	ws82-14	OK	11.0257	7.98436	-0.46562	1.03096	0.302559	0.777349	no
Glyma01g04361	Glyma01g04361	Glyma01g04361	Gm01:3905975-3906745	ws82-0	ws82-14	NOTEST	0	0	0	0	1	1	no
Glyma01g04370	Glyma01g04370	Glyma01g04370	Gm01:3910797-3912019	ws82-0	ws82-14	NOTEST	0.134137	0	-1.79769e+308	-1.79769e+308	0.0398236	1	no
Glyma01g04380	Glyma01g04380	Glyma01g04380	Gm01:3925166-3926952	ws82-0	ws82-14	OK	1.32235	1.70616	0.367648	-0.600034	0.548484	0.914624	no
Glyma01g04400	Glyma01g04400	Glyma01g04400	Gm01:3936729-3941417	ws82-0	ws82-14	OK	14.5479	14.8003	0.0248159	-0.0558791	0.955438	0.997364	no
Glyma01g04410	Glyma01g04410	Glyma01g04410	Gm01:3950636-3955032	ws82-0	ws82-14	OK	2.28893	0.923886	-1.30888	1.99275	0.0462884	0.308879	no
Glyma01g04421	Glyma01g04421	Glyma01g04421	Gm01:3965515-3967099	ws82-0	ws82-14	NOTEST	0.261994	0.294984	0.171103	-0.176673	0.859765	1	no
Glyma01g04430	Glyma01g04430	Glyma01g04430	Gm01:3981173-3984324	ws82-0	ws82-14	NOTEST	0.223708	0.170903	-0.388438	0.474918	0.634846	1	no
Glyma01g04440	Glyma01g04440	Glyma01g04440	Gm01:3984541-3989981	ws82-0	ws82-14	OK	6.08281	5.76849	-0.0765449	0.160824	0.872232	0.986634	no
Glyma01g04450	Glyma01g04450	Glyma01g04450	Gm01:3990476-3991986	ws82-0	ws82-14	OK	0.75852	0.976719	0.364755	-0.487744	0.625731	0.939515	no
Glyma01g04460	Glyma01g04460	Glyma01g04460	Gm01:3993484-3995564	ws82-0	ws82-14	OK	8.36106	8.99869	0.106028	-0.23791	0.811951	0.978544	no
Glyma01g04468	Glyma01g04468	Glyma01g04468	Gm01:4005281-4011408	ws82-0	ws82-14	NOTEST	0.371602	0.385946	0.0546407	-0.0607819	0.951533	1	no
Glyma01g04476	Glyma01g04476	Glyma01g04476	Gm01:4012612-4020206	ws82-0	ws82-14	OK	5.45919	5.54077	0.0213975	-0.048168	0.961582	0.997377	no
Glyma01g04484	Glyma01g04484	Glyma01g04484	Gm01:4023641-4024312	ws82-0	ws82-14	OK	9.33774	7.04803	-0.405852	0.633052	0.5267	0.904038	no
Glyma01g04492	Glyma01g04492	Glyma01g04492	Gm01:4024327-4035566	ws82-0	ws82-14	OK	8.26907	5.07446	-0.70447	1.58385	0.113229	0.510762	no
Glyma01g04500	Glyma01g04500	Glyma01g04500	Gm01:4070066-4074636	ws82-0	ws82-14	OK	0.745471	0.576006	-0.372069	0.576876	0.564023	0.919276	no
Glyma01g04515	Glyma01g04515	Glyma01g04515	Gm01:4094045-4096371	ws82-0	ws82-14	OK	3.34612	3.11431	-0.103578	0.216082	0.828924	0.980661	no
Glyma01g04530	Glyma01g04530	Glyma01g04530	Gm01:4108620-4111438	ws82-0	ws82-14	OK	29.8039	34.4203	0.207757	-0.451283	0.651786	0.946557	no
Glyma01g04545	Glyma01g04545	Glyma01g04545	Gm01:4119639-4119995	ws82-0	ws82-14	NOTEST	0	0	0	0	1	1	no
Glyma01g04560	Glyma01g04560	Glyma01g04560	Gm01:4134768-4138744	ws82-0	ws82-14	OK	4.7043	6.12943	0.381775	-0.715845	0.474087	0.885554	no
Glyma01g04570	Glyma01g04570	Glyma01g04570	Gm01:4140494-4144862	ws82-0	ws82-14	OK	11.0801	11.1346	0.00708173	-0.015238	0.987842	0.99899	no
Glyma01g04580	Glyma01g04580	Glyma01g04580	Gm01:4160568-4163236	ws82-0	ws82-14	OK	3.00496	1.04439	-1.52469	2.41661	0.0156658	0.158569	no
Glyma01g04590	Glyma01g04590	Glyma01g04590	Gm01:4190455-4199176	ws82-0	ws82-14	OK	1.00789	1.09901	0.124862	-0.236849	0.812774	0.978544	no
Glyma01g04600	Glyma01g04600	Glyma01g04600	Gm01:4213202-4215294	ws82-0	ws82-14	OK	11.1925	15.204	0.441923	-0.943854	0.345244	0.811489	no
Glyma01g04610	Glyma01g04610	Glyma01g04610	Gm01:4217440-4221353	ws82-0	ws82-14	OK	2.73337	4.20352	0.62092	-1.09796	0.272224	0.747202	no
Glyma01g04616	Glyma01g04616	Glyma01g04616	Gm01:4234777-4236309	ws82-0	ws82-14	NOTEST	0	0	0	0	1	1	no
Glyma01g04623	Glyma01g04623	Glyma01g04623	Gm01:4248628-4253094	ws82-0	ws82-14	NOTEST	0	0.0342431	1.79769e+308	1.79769e+308	0.166461	1	no
Glyma01g04630	Glyma01g04630	Glyma01g04630	Gm01:4267486-4273671	ws82-0	ws82-14	OK	0.425724	1.06715	1.32577	-1.98856	0.0467501	0.310314	no
Glyma01g04640	Glyma01g04640	Glyma01g04640	Gm01:4278592-4280521	ws82-0	ws82-14	NOTEST	0.0299383	0.187192	2.64445	-1.68697	0.0916091	1	no
Glyma01g04650	Glyma01g04650	Glyma01g04650	Gm01:4282743-4288290	ws82-0	ws82-14	NOTEST	0	0	0	0	1	1	no
Glyma01g04660	Glyma01g04660	Glyma01g04660	Gm01:4294494-4299400	ws82-0	ws82-14	OK	0.670697	2.26509	1.75584	-2.79921	0.00512275	0.0759449	no
Glyma01g04670	Glyma01g04670	Glyma01g04670	Gm01:4302121-4303918	ws82-0	ws82-14	OK	0.760091	0.715408	-0.0874058	0.11381	0.909389	0.992427	no
Glyma01g04690	Glyma01g04690	Glyma01g04690	Gm01:4314360-4316230	ws82-0	ws82-14	OK	13.3018	11.7336	-0.180977	0.397198	0.691221	0.956855	no
Glyma01g04700	Glyma01g04700	Glyma01g04700	Gm01:4319542-4321677	ws82-0	ws82-14	NOTEST	0	0	0	0	1	1	no
Glyma01g04710	Glyma01g04710	Glyma01g04710	Gm01:4323773-4325439	ws82-0	ws82-14	OK	176.33	194.55	0.141861	-0.286779	0.774281	0.972265	no
Glyma01g04720	Glyma01g04720	Glyma01g04720	Gm01:4331150-4337114	ws82-0	ws82-14	OK	7.49548	6.71285	-0.159095	0.336925	0.736173	0.96754	no
Glyma01g04730	Glyma01g04730	Glyma01g04730	Gm01:4347876-4356892	ws82-0	ws82-14	OK	7.95529	3.47349	-1.19553	2.60516	0.00918315	0.111687	no
Glyma01g04740	Glyma01g04740	Glyma01g04740	Gm01:4358996-4361499	ws82-0	ws82-14	OK	1.33005	0.913311	-0.542305	0.788926	0.430155	0.863883	no
Glyma01g04750	Glyma01g04750	Glyma01g04750	Gm01:4367348-4370072	ws82-0	ws82-14	OK	0.818638	1.29714	0.664033	-0.950375	0.341922	0.809716	no
Glyma01g04760	Glyma01g04760	Glyma01g04760	Gm01:4370091-4371490	ws82-0	ws82-14	OK	44.849	53.6459	0.258391	-0.578923	0.562641	0.919049	no
Glyma01g04770	Glyma01g04770	Glyma01g04770	Gm01:4372756-4380517	ws82-0	ws82-14	NOTEST	0	0	0	0	1	1	no
Glyma01g04780	Glyma01g04780	Glyma01g04780	Gm01:4372756-4380517	ws82-0	ws82-14	NOTEST	0.199702	0.0791089	-1.33594	0.40094	0.688464	1	no
Glyma01g04791	Glyma01g04791	Glyma01g04791	Gm01:4372756-4380517	ws82-0	ws82-14	NOTEST	0.115731	0.118718	0.0367585	-0.0412961	0.96706	1	no
Glyma01g04800	Glyma01g04800	Glyma01g04800	Gm01:4381634-4382677	ws82-0	ws82-14	NOTEST	0	0	0	0	1	1	no
Glyma01g04810	Glyma01g04810	Glyma01g04810	Gm01:4398540-4400009	ws82-0	ws82-14	NOTEST	0	0	0	0	1	1	no
Glyma01g04820	Glyma01g04820	Glyma01g04820	Gm01:4406613-4412858	ws82-0	ws82-14	OK	9.08202	6.70911	-0.436892	0.98232	0.325942	0.797159	no
Glyma01g04830	Glyma01g04830	Glyma01g04830	Gm01:4435158-4439690	ws82-0	ws82-14	OK	16.4521	18.3816	0.159986	-0.35916	0.719476	0.964414	no
Glyma01g04860	Glyma01g04860	Glyma01g04860	Gm01:4462980-4471168	ws82-0	ws82-14	OK	2.88084	3.37981	0.230453	-0.456519	0.648017	0.945512	no
Glyma01g04870	Glyma01g04870	Glyma01g04870	Gm01:4462980-4471168	ws82-0	ws82-14	NOTEST	0.0328724	0.187081	2.50871	-0.607029	0.543832	1	no
Glyma01g04880	Glyma01g04880	Glyma01g04880	Gm01:4472509-4474524	ws82-0	ws82-14	OK	15.9695	10.6169	-0.588955	1.29323	0.195931	0.654984	no
Glyma01g04890	Glyma01g04890	Glyma01g04890	Gm01:4508033-4510800	ws82-0	ws82-14	OK	22.4094	25.8612	0.206688	-0.431426	0.666159	0.949908	no
Glyma01g04895	Glyma01g04895	Glyma01g04895	Gm01:4537147-4539699	ws82-0	ws82-14	NOTEST	0	0	0	0	1	1	no
Glyma01g04900	Glyma01g04900	Glyma01g04900	Gm01:4581543-4588129	ws82-0	ws82-14	OK	5.20715	2.34489	-1.15098	2.2332	0.0255358	0.217124	no
Glyma01g04920	Glyma01g04920	Glyma01g04920	Gm01:4591469-4596424	ws82-0	ws82-14	OK	61.0614	17.4274	-1.8089	3.66972	0.00024282	0.00802952	yes
Glyma01g04930	Glyma01g04930	Glyma01g04930	Gm01:4617117-4621351	ws82-0	ws82-14	OK	17.9675	8.66065	-1.05284	2.22193	0.0262879	0.219748	no
Glyma01g04940	Glyma01g04940	Glyma01g04940	Gm01:4623827-4626604	ws82-0	ws82-14	NOTEST	0	0	0	0	1	1	no
Glyma01g04950	Glyma01g04950	Glyma01g04950	Gm01:4628266-4630966	ws82-0	ws82-14	NOTEST	0	0.0459628	1.79769e+308	1.79769e+308	0.162559	1	no
Glyma01g04970	Glyma01g04970	Glyma01g04970	Gm01:4642856-4646062	ws82-0	ws82-14	NOTEST	0	0	0	0	1	1	no
Glyma01g04980	Glyma01g04980	Glyma01g04980	Gm01:4649145-4655506	ws82-0	ws82-14	OK	25.1493	26.0717	0.0519678	-0.111422	0.911282	0.992702	no
Glyma01g04991	Glyma01g04991	Glyma01g04991	Gm01:4658655-4660266	ws82-0	ws82-14	OK	1.01546	0.86202	-0.236336	0.345211	0.729936	0.96604	no
Glyma01g05000	Glyma01g05000	Glyma01g05000	Gm01:4661267-4665903	ws82-0	ws82-14	OK	5.67481	5.39641	-0.0725707	0.141136	0.887763	0.989028	no
Glyma01g05020	Glyma01g05020	Glyma01g05020	Gm01:4671907-4672948	ws82-0	ws82-14	NOTEST	0	0	0	0	1	1	no
Glyma01g05035	Glyma01g05035	Glyma01g05035	Gm01:4674370-4675308	ws82-0	ws82-14	NOTEST	0	0	0	0	1	1	no
Glyma01g05050	Glyma01g05050	Glyma01g05050	Gm01:4685833-4692108	ws82-0	ws82-14	NOTEST	0	0	0	0	1	1	no
Glyma01g05060	Glyma01g05060	Glyma01g05060	Gm01:4706315-4710196	ws82-0	ws82-14	NOTEST	0.0356473	0	-1.79769e+308	-1.79769e+308	0.276872	1	no
Glyma01g05070	Glyma01g05070	Glyma01g05070	Gm01:4710246-4716428	ws82-0	ws82-14	NOTEST	0	0	0	0	1	1	no
Glyma01g05080	Glyma01g05080	Glyma01g05080	Gm01:4729092-4732808	ws82-0	ws82-14	OK	5.53034	1.86148	-1.57092	2.53121	0.0113669	0.128232	no
Glyma01g05090	Glyma01g05090	Glyma01g05090	Gm01:4733168-4736974	ws82-0	ws82-14	NOTEST	0.0695145	0.122169	0.813491	-0.645023	0.518912	1	no
Glyma01g05100	Glyma01g05100	Glyma01g05100	Gm01:4750064-4755456	ws82-0	ws82-14	OK	1.71299	1.71836	0.00451306	-0.00823059	0.993433	0.999254	no
Glyma01g05110	Glyma01g05110	Glyma01g05110	Gm01:4767629-4768506	ws82-0	ws82-14	NOTEST	0	0	0	0	1	1	no
Glyma01g05120	Glyma01g05120	Glyma01g05120	Gm01:4767629-4768506	ws82-0	ws82-14	NOTEST	0	0	0	0	1	1	no
Glyma01g05135	Glyma01g05135	Glyma01g05135	Gm01:4772497-4774260	ws82-0	ws82-14	NOTEST	0	0	0	0	1	1	no
Glyma01g05150	Glyma01g05150	Glyma01g05150	Gm01:4805906-4807682	ws82-0	ws82-14	OK	94.8094	88.8729	-0.0932866	0.1971	0.843749	0.982907	no
Glyma01g05160	Glyma01g05160	Glyma01g05160	Gm01:4822853-4826845	ws82-0	ws82-14	OK	7.57592	10.8861	0.522994	-1.16679	0.243296	0.71662	no
Glyma01g05170	Glyma01g05170	Glyma01g05170	Gm01:4850795-4854700	ws82-0	ws82-14	OK	6.65792	4.5929	-0.535666	1.08702	0.277027	0.751733	no
Glyma01g05180	Glyma01g05180	Glyma01g05180	Gm01:4855329-4863296	ws82-0	ws82-14	NOTEST	0.00772113	0.0889931	3.52681	-0.447455	0.654546	1	no
Glyma01g05190	Glyma01g05190	Glyma01g05190	Gm01:4855329-4863296	ws82-0	ws82-14	OK	0.489795	0.189879	-1.3671	1.64049	0.100904	0.480377	no
Glyma01g05220	Glyma01g05220	Glyma01g05220	Gm01:4891977-4893336	ws82-0	ws82-14	OK	71.3881	34.4337	-1.05186	2.29683	0.0216287	0.1947	no
Glyma01g05230	Glyma01g05230	Glyma01g05230	Gm01:4900381-4902743	ws82-0	ws82-14	OK	3.29204	4.54347	0.464813	-0.92409	0.355439	0.819835	no
Glyma01g05240	Glyma01g05240	Glyma01g05240	Gm01:4928138-4929616	ws82-0	ws82-14	OK	0.549833	0.205582	-1.41928	1.13728	0.255422	0.731227	no
Glyma01g05310	Glyma01g05310	Glyma01g05310	Gm01:4961751-4963489	ws82-0	ws82-14	NOTEST	0.0679148	0.0591615	-0.199067	0.0973418	0.922455	1	no
Glyma01g05321	Glyma01g05321	Glyma01g05321	Gm01:5005094-5010084	ws82-0	ws82-14	OK	1.85126	0.868044	-1.09267	1.27444	0.202509	0.664079	no
Glyma01g05330	Glyma01g05330	Glyma01g05330	Gm01:5020413-5021405	ws82-0	ws82-14	NOTEST	0	0	0	0	1	1	no
Glyma01g05340	Glyma01g05340	Glyma01g05340	Gm01:5037886-5042760	ws82-0	ws82-14	OK	11.4115	6.58132	-0.794039	1.66151	0.0966102	0.467599	no
Glyma01g05350	Glyma01g05350	Glyma01g05350	Gm01:5083980-5085647	ws82-0	ws82-14	OK	18.9673	15.5156	-0.289798	0.650546	0.51534	0.899534	no
Glyma01g05360	Glyma01g05360	Glyma01g05360	Gm01:5110798-5114049	ws82-0	ws82-14	OK	1.36279	1.49361	0.132244	-0.185305	0.85299	0.984216	no
Glyma01g05370	Glyma01g05370	Glyma01g05370	Gm01:5118887-5122289	ws82-0	ws82-14	OK	0.28708	1.18305	2.04299	-2.16163	0.0306468	0.24314	no
Glyma01g05390	Glyma01g05390	Glyma01g05390	Gm01:5164083-5165652	ws82-0	ws82-14	NOTEST	0	0	0	0	1	1	no
Glyma01g05410	Glyma01g05410	Glyma01g05410	Gm01:5213600-5216013	ws82-0	ws82-14	OK	17.9323	14.1822	-0.338481	0.753886	0.450918	0.874516	no
Glyma01g05430	Glyma01g05430	Glyma01g05430	Gm01:5252557-5258022	ws82-0	ws82-14	OK	3.44327	5.02297	0.544761	-1.03376	0.301249	0.776584	no
Glyma01g05435	Glyma01g05435	Glyma01g05435	Gm01:5252557-5258022	ws82-0	ws82-14	NOTEST	0	0.208571	1.79769e+308	1.79769e+308	0.366053	1	no
Glyma01g05440	Glyma01g05440	Glyma01g05440	Gm01:5263624-5268235	ws82-0	ws82-14	OK	2.59568	2.71029	0.0623305	-0.118297	0.905833	0.991899	no
Glyma01g05450	Glyma01g05450	Glyma01g05450	Gm01:5286387-5287671	ws82-0	ws82-14	OK	1.75024	0.635518	-1.46155	1.9276	0.0539052	0.337788	no
Glyma01g05470	Glyma01g05470	Glyma01g05470	Gm01:5303846-5307805	ws82-0	ws82-14	OK	0.775703	2.13164	1.45839	-2.26825	0.0233138	0.204936	no
Glyma01g05490	Glyma01g05490	Glyma01g05490	Gm01:5313627-5317389	ws82-0	ws82-14	OK	8.54932	7.62793	-0.164517	0.319683	0.749208	0.969309	no
Glyma01g05500	Glyma01g05500	Glyma01g05500	Gm01:5324074-5325556	ws82-0	ws82-14	NOTEST	0.144244	0.0691061	-1.06163	0.836419	0.402919	1	no
Glyma01g05521	Glyma01g05521	Glyma01g05521	Gm01:5332060-5334718	ws82-0	ws82-14	NOTEST	0	0	0	0	1	1	no
Glyma01g05540	Glyma01g05540	Glyma01g05540	Gm01:5339676-5347885	ws82-0	ws82-14	NOTEST	0.0378275	0.174848	2.20859	-0.906218	0.36482	1	no
Glyma01g05550	Glyma01g05550	Glyma01g05550	Gm01:5348570-5352305	ws82-0	ws82-14	OK	11.708	12.2749	0.0682164	-0.152595	0.878717	0.987894	no
Glyma01g05565	Glyma01g05565	Glyma01g05565	Gm01:5365957-5368432	ws82-0	ws82-14	OK	0.715746	0.364048	-0.975318	1.05538	0.291253	0.766427	no
Glyma01g05580	Glyma01g05580	Glyma01g05580	Gm01:5372439-5377697	ws82-0	ws82-14	OK	1.68463	1.70142	0.0143071	-0.0259336	0.97931	0.998584	no
Glyma01g05680	Glyma01g05680	Glyma01g05680	Gm01:5434961-5437325	ws82-0	ws82-14	NOTEST	0	0	0	0	1	1	no
Glyma01g05710	Glyma01g05710	Glyma01g05710	Gm01:5452126-5455897	ws82-0	ws82-14	NOTEST	0.0201291	0.0175658	-0.196511	0.0960918	0.923448	1	no
Glyma01g05740	Glyma01g05740	Glyma01g05740	Gm01:5471207-5473302	ws82-0	ws82-14	OK	28.204	25.782	-0.129534	0.291932	0.770339	0.971975	no
Glyma01g05750	Glyma01g05750	Glyma01g05750	Gm01:5490127-5498444	ws82-0	ws82-14	OK	12.1451	6.90478	-0.81471	1.78063	0.0749728	0.409745	no
Glyma01g05760	Glyma01g05760	Glyma01g05760	Gm01:5490127-5498444	ws82-0	ws82-14	OK	3.82729	2.42748	-0.656865	0.332892	0.739216	0.968432	no
Glyma01g05765	Glyma01g05765	Glyma01g05765	Gm01:5500755-5503968	ws82-0	ws82-14	OK	1.21985	0.895899	-0.445291	0.584203	0.559084	0.918302	no
Glyma01g05770	Glyma01g05770	Glyma01g05770	Gm01:5507145-5510888	ws82-0	ws82-14	OK	0.760092	0.632668	-0.264724	0.321191	0.748066	0.969123	no
Glyma01g05775	Glyma01g05775	Glyma01g05775	Gm01:5515370-5518889	ws82-0	ws82-14	NOTEST	0	0	0	0	1	1	no
Glyma01g05780	Glyma01g05780	Glyma01g05780	Gm01:5532190-5532902	ws82-0	ws82-14	OK	0.415176	1.14717	1.46628	-1.42549	0.154015	0.592399	no
Glyma01g05800	Glyma01g05800	Glyma01g05800	Gm01:5536188-5540803	ws82-0	ws82-14	OK	22.8411	24.5616	0.104773	-0.235341	0.813944	0.978621	no
Glyma01g05805	Glyma01g05805	Glyma01g05805	Gm01:5546122-5546986	ws82-0	ws82-14	NOTEST	0.0718128	0.0636689	-0.173652	0.0849141	0.93233	1	no
Glyma01g05810	Glyma01g05810	Glyma01g05810	Gm01:5571757-5573352	ws82-0	ws82-14	OK	7.77674	7.02433	-0.146803	0.314432	0.753193	0.969604	no
Glyma01g05820	Glyma01g05820	Glyma01g05820	Gm01:5576197-5588666	ws82-0	ws82-14	OK	7.93907	6.71467	-0.241653	0.371594	0.710195	0.962101	no
Glyma01g05830	Glyma01g05830	Glyma01g05830	Gm01:5591933-5594156	ws82-0	ws82-14	OK	0.288288	0.560341	0.958796	-1.25256	0.210366	0.675021	no
Glyma01g05840	Glyma01g05840	Glyma01g05840	Gm01:5603554-5605881	ws82-0	ws82-14	NOTEST	0	0	0	0	1	1	no
Glyma01g05850	Glyma01g05850	Glyma01g05850	Gm01:5614232-5617834	ws82-0	ws82-14	NOTEST	0.100038	0.270999	1.43774	-1.18518	0.235946	1	no
Glyma01g05860	Glyma01g05860	Glyma01g05860	Gm01:5646198-5652308	ws82-0	ws82-14	OK	2.15939	2.28482	0.0814567	-0.155774	0.876211	0.987326	no
Glyma01g05871	Glyma01g05871	Glyma01g05871	Gm01:5655285-5657085	ws82-0	ws82-14	OK	0.0673686	0.537661	2.99655	-1.92902	0.0537286	0.337004	no
Glyma01g05880	Glyma01g05880	Glyma01g05880	Gm01:5667408-5668624	ws82-0	ws82-14	OK	2.78009	2.50231	-0.151875	0.255882	0.798042	0.975928	no
Glyma01g05890	Glyma01g05890	Glyma01g05890	Gm01:5668699-5671152	ws82-0	ws82-14	NOTEST	0.0268339	0.171183	2.67341	-1.70544	0.088112	1	no
Glyma01g05920	Glyma01g05920	Glyma01g05920	Gm01:5704147-5706648	ws82-0	ws82-14	OK	2.57798	3.65518	0.503701	-0.992067	0.321165	0.792409	no
Glyma01g05933	Glyma01g05933	Glyma01g05933	Gm01:5723315-5724248	ws82-0	ws82-14	NOTEST	0	0	0	0	1	1	no
Glyma01g05946	Glyma01g05946	Glyma01g05946	Gm01:5726524-5728292	ws82-0	ws82-14	NOTEST	0	0	0	0	1	1	no
Glyma01g05960	Glyma01g05960	Glyma01g05960	Gm01:5750258-5754433	ws82-0	ws82-14	OK	1.16252	0.996227	-0.222715	0.359788	0.719006	0.964414	no
Glyma01g05970	Glyma01g05970	Glyma01g05970	Gm01:5789076-5789854	ws82-0	ws82-14	NOTEST	0	0.273217	1.79769e+308	1.79769e+308	0.0441598	1	no
Glyma01g05980	Glyma01g05980	Glyma01g05980	Gm01:5800710-5803197	ws82-0	ws82-14	NOTEST	0.0269472	0.100053	1.89255	-1.17749	0.239002	1	no
Glyma01g05991	Glyma01g05991	Glyma01g05991	Gm01:5815181-5815856	ws82-0	ws82-14	OK	1.44098	0.57852	-1.31661	1.58283	0.11346	0.511032	no
Glyma01g06001	Glyma01g06001	Glyma01g06001	Gm01:5820213-5821125	ws82-0	ws82-14	NOTEST	0	0	0	0	1	1	no
Glyma01g06010	Glyma01g06010	Glyma01g06010	Gm01:5849676-5850474	ws82-0	ws82-14	OK	2.96523	3.88694	0.390492	-0.629204	0.529215	0.904625	no
Glyma01g06030	Glyma01g06030	Glyma01g06030	Gm01:5873668-5876124	ws82-0	ws82-14	OK	32.6573	249.063	2.93103	-5.75611	8.60732e-09	1.67556e-06	yes
Glyma01g06060	Glyma01g06060	Glyma01g06060	Gm01:5950520-5957354	ws82-0	ws82-14	OK	2.4816	4.13846	0.737824	-1.41683	0.156532	0.593937	no
Glyma01g06080	Glyma01g06080	Glyma01g06080	Gm01:5980779-5983675	ws82-0	ws82-14	OK	10.0321	10.623	0.0825588	-0.177189	0.85936	0.984556	no
Glyma01g06091	Glyma01g06091	Glyma01g06091	Gm01:6001894-6002536	ws82-0	ws82-14	NOTEST	0	0	0	0	1	1	no
Glyma01g06101	Glyma01g06101	Glyma01g06101	Gm01:6012889-6016913	ws82-0	ws82-14	NOTEST	0	0	0	0	1	1	no
Glyma01g06110	Glyma01g06110	Glyma01g06110	Gm01:6012889-6016913	ws82-0	ws82-14	OK	159.021	93.0925	-0.772482	1.56973	0.116477	0.516941	no
Glyma01g06121	Glyma01g06121	Glyma01g06121	Gm01:6021842-6025894	ws82-0	ws82-14	NOTEST	0	0	0	0	1	1	no
Glyma01g06131	Glyma01g06131	Glyma01g06131	Gm01:6027072-6027783	ws82-0	ws82-14	NOTEST	0	0	0	0	1	1	no
Glyma01g06140	Glyma01g06140	Glyma01g06140	Gm01:6036836-6042396	ws82-0	ws82-14	NOTEST	0	0	0	0	1	1	no
Glyma01g06150	Glyma01g06150	Glyma01g06150	Gm01:6047154-6049059	ws82-0	ws82-14	OK	6.53847	3.92621	-0.735817	1.45165	0.146599	0.579451	no
Glyma01g06170	Glyma01g06170	Glyma01g06170	Gm01:6071138-6081550	ws82-0	ws82-14	OK	10.9603	10.5601	-0.053663	0.117371	0.906566	0.992048	no
Glyma01g06181	Glyma01g06181	Glyma01g06181	Gm01:6100672-6102037	ws82-0	ws82-14	NOTEST	0	0	0	0	1	1	no
Glyma01g06192	Glyma01g06192	Glyma01g06192	Gm01:6238679-6240315	ws82-0	ws82-14	NOTEST	0	0.148742	1.79769e+308	1.79769e+308	0.025956	1	no
Glyma01g06203	Glyma01g06203	Glyma01g06203	Gm01:6266528-6267750	ws82-0	ws82-14	NOTEST	0	0	0	0	1	1	no
Glyma01g06214	Glyma01g06214	Glyma01g06214	Gm01:6283658-6285214	ws82-0	ws82-14	NOTEST	0	0	0	0	1	1	no
Glyma01g06226	Glyma01g06226	Glyma01g06226	Gm01:6285502-6288118	ws82-0	ws82-14	NOTEST	0	0	0	0	1	1	no
Glyma01g06238	Glyma01g06238	Glyma01g06238	Gm01:6291503-6292208	ws82-0	ws82-14	NOTEST	0	0	0	0	1	1	no
Glyma01g06250	Glyma01g06250	Glyma01g06250	Gm01:6303783-6304910	ws82-0	ws82-14	NOTEST	0	0	0	0	1	1	no
Glyma01g06255	Glyma01g06255	Glyma01g06255	Gm01:6305430-6306253	ws82-0	ws82-14	NOTEST	0	0	0	0	1	1	no
Glyma01g06260	Glyma01g06260	Glyma01g06260	Gm01:6314251-6321822	ws82-0	ws82-14	OK	7.61979	6.80657	-0.162822	0.309933	0.756612	0.970493	no
Glyma01g06265	Glyma01g06265	Glyma01g06265	Gm01:6323487-6330290	ws82-0	ws82-14	NOTEST	0.41486	0.178512	-1.21661	1.75385	0.0794567	1	no
Glyma01g06270	Glyma01g06270	Glyma01g06270	Gm01:6353278-6357024	ws82-0	ws82-14	OK	8.10199	7.35427	-0.139693	0.296616	0.76676	0.971596	no
Glyma01g06281	Glyma01g06281	Glyma01g06281	Gm01:6358175-6364839	ws82-0	ws82-14	OK	0.391943	0.567361	0.533623	-0.720984	0.47092	0.883875	no
Glyma01g06290	Glyma01g06290	Glyma01g06290	Gm01:6415709-6426123	ws82-0	ws82-14	OK	12.9174	4.83874	-1.41661	2.75711	0.00583144	0.0823743	no
Glyma01g06300	Glyma01g06300	Glyma01g06300	Gm01:6427320-6430789	ws82-0	ws82-14	OK	21.7201	12.0372	-0.851523	1.90946	0.0562027	0.346672	no
Glyma01g06320	Glyma01g06320	Glyma01g06320	Gm01:6438347-6443201	ws82-0	ws82-14	OK	5.59232	7.48446	0.420451	-0.842475	0.399522	0.846625	no
Glyma01g06330	Glyma01g06330	Glyma01g06330	Gm01:6463489-6464681	ws82-0	ws82-14	NOTEST	0	0	0	0	1	1	no
Glyma01g06350	Glyma01g06350	Glyma01g06350	Gm01:6519357-6525574	ws82-0	ws82-14	NOTEST	0.0895357	0	-1.79769e+308	-1.79769e+308	0.155783	1	no
Glyma01g06370	Glyma01g06370	Glyma01g06370	Gm01:6606759-6612290	ws82-0	ws82-14	OK	0.28884	0.507003	0.811724	-1.17338	0.240643	0.713216	no
Glyma01g06380	Glyma01g06380	Glyma01g06380	Gm01:6619142-6624870	ws82-0	ws82-14	OK	2.90793	4.17114	0.52045	-0.879411	0.379178	0.83487	no
Glyma01g06403	Glyma01g06403	Glyma01g06403	Gm01:6653831-6654651	ws82-0	ws82-14	NOTEST	0	0	0	0	1	1	no
Glyma01g06426	Glyma01g06426	Glyma01g06426	Gm01:6655568-6658132	ws82-0	ws82-14	NOTEST	0	0	0	0	1	1	no
Glyma01g06450	Glyma01g06450	Glyma01g06450	Gm01:6697229-6704493	ws82-0	ws82-14	OK	1.90995	3.34439	0.808209	-1.65215	0.0985039	0.472842	no
Glyma01g06465	Glyma01g06465	Glyma01g06465	Gm01:6734268-6734951	ws82-0	ws82-14	NOTEST	0	0	0	0	1	1	no
Glyma01g06480	Glyma01g06480	Glyma01g06480	Gm01:6737090-6743586	ws82-0	ws82-14	NOTEST	0.354791	0.197857	-0.842514	0.769381	0.441667	1	no
Glyma01g06530	Glyma01g06530	Glyma01g06530	Gm01:6773745-6780125	ws82-0	ws82-14	NOTEST	0.121305	0.046351	-1.38796	0.949443	0.342396	1	no
Glyma01g06540	Glyma01g06540	Glyma01g06540	Gm01:6785070-6791180	ws82-0	ws82-14	OK	1.40218	1.69385	0.272632	-0.335618	0.737159	0.967953	no
Glyma01g06550	Glyma01g06550	Glyma01g06550	Gm01:6797682-6802949	ws82-0	ws82-14	OK	7.63775	4.49806	-0.763843	1.67253	0.0944194	0.46143	no
Glyma01g06575	Glyma01g06575	Glyma01g06575	Gm01:6821946-6822491	ws82-0	ws82-14	NOTEST	0	0	0	0	1	1	no
Glyma01g06600	Glyma01g06600	Glyma01g06600	Gm01:6945949-6947844	ws82-0	ws82-14	OK	15.0071	11.1107	-0.433698	0.797888	0.424935	0.860984	no
Glyma01g06610	Glyma01g06610	Glyma01g06610	Gm01:6949449-6956726	ws82-0	ws82-14	NOTEST	0.0812697	0.0358161	-1.18211	0.548821	0.583128	1	no
Glyma01g06620	Glyma01g06620	Glyma01g06620	Gm01:6963802-6967415	ws82-0	ws82-14	OK	7.69214	7.07407	-0.120843	0.246475	0.805315	0.977392	no
Glyma01g06630	Glyma01g06630	Glyma01g06630	Gm01:6987088-6990503	ws82-0	ws82-14	OK	5.40449	6.85337	0.342656	-0.670865	0.502307	0.893673	no
Glyma01g06640	Glyma01g06640	Glyma01g06640	Gm01:6992005-6995011	ws82-0	ws82-14	OK	0.466285	2.99051	2.68111	-3.72466	0.000195579	0.00677564	yes
Glyma01g06660	Glyma01g06660	Glyma01g06660	Gm01:7007301-7012903	ws82-0	ws82-14	NOTEST	0.051176	0.0481763	-0.0871439	0.0496768	0.96038	1	no
Glyma01g06671	Glyma01g06671	Glyma01g06671	Gm01:7051709-7055503	ws82-0	ws82-14	NOTEST	0	0	0	0	1	1	no
Glyma01g06681	Glyma01g06681	Glyma01g06681	Gm01:7074917-7078717	ws82-0	ws82-14	OK	6.48657	4.9351	-0.394376	0.887579	0.374767	0.831675	no
Glyma01g06690	Glyma01g06690	Glyma01g06690	Gm01:7089055-7091542	ws82-0	ws82-14	NOTEST	0.0912343	0.229376	1.33007	-1.4132	0.157596	1	no
Glyma01g06700	Glyma01g06700	Glyma01g06700	Gm01:7093539-7097353	ws82-0	ws82-14	OK	1.92195	1.43741	-0.419093	0.684991	0.49335	0.892445	no
Glyma01g06720	Glyma01g06720	Glyma01g06720	Gm01:7128540-7130153	ws82-0	ws82-14	NOTEST	0	0	0	0	1	1	no
Glyma01g06730	Glyma01g06730	Glyma01g06730	Gm01:7131214-7140582	ws82-0	ws82-14	OK	1.60005	1.13495	-0.495481	0.852135	0.394139	0.844246	no
Glyma01g06740	Glyma01g06740	Glyma01g06740	Gm01:7146652-7148230	ws82-0	ws82-14	OK	36.9858	42.5775	0.203119	-0.396572	0.691683	0.956855	no
Glyma01g06750	Glyma01g06750	Glyma01g06750	Gm01:7149379-7152784	ws82-0	ws82-14	OK	4.88239	5.38588	0.141593	-0.270883	0.786481	0.974049	no
Glyma01g06762	Glyma01g06762	Glyma01g06762	Gm01:7159103-7161168	ws82-0	ws82-14	NOTEST	0	0	0	0	1	1	no
Glyma01g06774	Glyma01g06774	Glyma01g06774	Gm01:7193728-7195967	ws82-0	ws82-14	NOTEST	0	0	0	0	1	1	no
Glyma01g06787	Glyma01g06787	Glyma01g06787	Gm01:7202426-7203771	ws82-0	ws82-14	NOTEST	0.125816	0.212654	0.75719	-0.422948	0.672333	1	no
Glyma01g06800	Glyma01g06800	Glyma01g06800	Gm01:7209667-7216248	ws82-0	ws82-14	OK	7.68014	6.32686	-0.279644	0.577737	0.563442	0.919049	no
Glyma01g06810	Glyma01g06810	Glyma01g06810	Gm01:7209667-7216248	ws82-0	ws82-14	OK	0.633447	0.723198	0.191167	-0.0942125	0.92494	0.993813	no
Glyma01g06820	Glyma01g06820	Glyma01g06820	Gm01:7217423-7219310	ws82-0	ws82-14	OK	0.135406	0.961225	2.82758	-2.4633	0.0137663	0.1457	no
Glyma01g06830	Glyma01g06830	Glyma01g06830	Gm01:7247591-7249157	ws82-0	ws82-14	NOTEST	0	0.0377228	1.79769e+308	1.79769e+308	0.162559	1	no
Glyma01g06840	Glyma01g06840	Glyma01g06840	Gm01:7250230-7254936	ws82-0	ws82-14	OK	14.4957	14.8961	0.0393037	-0.0884129	0.929548	0.994288	no
Glyma01g06850	Glyma01g06850	Glyma01g06850	Gm01:7272747-7275098	ws82-0	ws82-14	OK	1.82545	2.47367	0.438403	-0.738651	0.460119	0.879161	no
Glyma01g06860	Glyma01g06860	Glyma01g06860	Gm01:7277818-7281645	ws82-0	ws82-14	NOTEST	0	0	0	0	1	1	no
Glyma01g06870	Glyma01g06870	Glyma01g06870	Gm01:7343212-7351310	ws82-0	ws82-14	OK	2.99625	4.84279	0.692683	-1.2104	0.226124	0.696935	no
Glyma01g06880	Glyma01g06880	Glyma01g06880	Gm01:7358248-7360930	ws82-0	ws82-14	NOTEST	0.0617401	0.185238	1.5851	-1.5533	0.120352	1	no
Glyma01g06902	Glyma01g06902	Glyma01g06902	Gm01:7382653-7384804	ws82-0	ws82-14	NOTEST	0	0	0	0	1	1	no
Glyma01g06924	Glyma01g06924	Glyma01g06924	Gm01:7422342-7427765	ws82-0	ws82-14	NOTEST	0	0	0	0	1	1	no
Glyma01g06947	Glyma01g06947	Glyma01g06947	Gm01:7435646-7436810	ws82-0	ws82-14	NOTEST	0	0	0	0	1	1	no
Glyma01g06970	Glyma01g06970	Glyma01g06970	Gm01:7479447-7482232	ws82-0	ws82-14	OK	6.02277	17.6484	1.55104	-3.44221	0.000576976	0.0155688	yes
Glyma01g06980	Glyma01g06980	Glyma01g06980	Gm01:7497548-7505696	ws82-0	ws82-14	NOTEST	0	0	0	0	1	1	no
Glyma01g06995	Glyma01g06995	Glyma01g06995	Gm01:7509309-7511663	ws82-0	ws82-14	NOTEST	0	0	0	0	1	1	no
Glyma01g07010	Glyma01g07010	Glyma01g07010	Gm01:7546180-7550537	ws82-0	ws82-14	OK	12.0214	8.12593	-0.564999	1.22664	0.219956	0.688579	no
Glyma01g07020	Glyma01g07020	Glyma01g07020	Gm01:7562682-7571075	ws82-0	ws82-14	OK	1.42224	3.05411	1.10258	-1.36204	0.173186	0.619733	no
Glyma01g07040	Glyma01g07040	Glyma01g07040	Gm01:7573115-7574981	ws82-0	ws82-14	OK	0.387331	0.541773	0.484124	-0.640847	0.521622	0.901646	no
Glyma01g07046	Glyma01g07046	Glyma01g07046	Gm01:7576240-7581159	ws82-0	ws82-14	OK	0.553033	0.312253	-0.824648	0.906873	0.364474	0.825478	no
Glyma01g07053	Glyma01g07053	Glyma01g07053	Gm01:7587960-7591978	ws82-0	ws82-14	NOTEST	0	0	0	0	1	1	no
Glyma01g07060	Glyma01g07060	Glyma01g07060	Gm01:7606030-7608993	ws82-0	ws82-14	NOTEST	0	0	0	0	1	1	no
Glyma01g07070	Glyma01g07070	Glyma01g07070	Gm01:7614281-7618124	ws82-0	ws82-14	OK	6.93593	7.32183	0.0781153	-0.167789	0.866749	0.986001	no
Glyma01g07080	Glyma01g07080	Glyma01g07080	Gm01:7621975-7627809	ws82-0	ws82-14	OK	2.10881	2.52432	0.259467	-0.203203	0.838977	0.981535	no
Glyma01g07091	Glyma01g07091	Glyma01g07091	Gm01:7621975-7627809	ws82-0	ws82-14	OK	2.22993	2.39025	0.100164	-0.18504	0.853198	0.984216	no
Glyma01g07100	Glyma01g07100	Glyma01g07100	Gm01:7645596-7648115	ws82-0	ws82-14	OK	37.9024	45.0979	0.25077	-0.55354	0.579894	0.924204	no
Glyma01g07110	Glyma01g07110	Glyma01g07110	Gm01:7657795-7664672	ws82-0	ws82-14	NOTEST	0.0366564	0.13326	1.86211	-1.15855	0.246641	1	no
Glyma01g07120	Glyma01g07120	Glyma01g07120	Gm01:7694027-7700472	ws82-0	ws82-14	OK	38.0707	112.853	1.56769	-2.69226	0.00709693	0.0946566	no
Glyma01g07130	Glyma01g07130	Glyma01g07130	Gm01:7726769-7727260	ws82-0	ws82-14	OK	106.872	70.505	-0.600089	1.33872	0.18066	0.632213	no
Glyma01g07140	Glyma01g07140	Glyma01g07140	Gm01:7745867-7748795	ws82-0	ws82-14	OK	0.605643	0.868093	0.519382	-0.643318	0.520018	0.901083	no
Glyma01g07150	Glyma01g07150	Glyma01g07150	Gm01:7755456-7755710	ws82-0	ws82-14	NOTEST	0	0	0	0	1	1	no
Glyma01g07155	Glyma01g07155	Glyma01g07155	Gm01:7761366-7761600	ws82-0	ws82-14	OK	2.79367	7.75519	1.473	-0.888403	0.374324	0.831346	no
Glyma01g07160	Glyma01g07160	Glyma01g07160	Gm01:7762334-7764158	ws82-0	ws82-14	OK	0.808517	1.06973	0.403899	-0.564583	0.572357	0.921452	no
Glyma01g07175	Glyma01g07175	Glyma01g07175	Gm01:7777226-7781079	ws82-0	ws82-14	OK	1.88274	1.87149	-0.00864821	0.0152235	0.987854	0.99899	no
Glyma01g07190	Glyma01g07190	Glyma01g07190	Gm01:7781287-7786746	ws82-0	ws82-14	OK	2.04725	2.76324	0.432671	-0.689894	0.490261	0.891388	no
Glyma01g07212	Glyma01g07212	Glyma01g07212	Gm01:7794008-7794422	ws82-0	ws82-14	NOTEST	0	0	0	0	1	1	no
Glyma01g07234	Glyma01g07234	Glyma01g07234	Gm01:7804303-7805165	ws82-0	ws82-14	NOTEST	0.270127	0.276186	0.0320018	-0.0311299	0.975166	1	no
Glyma01g07256	Glyma01g07256	Glyma01g07256	Gm01:7805183-7807029	ws82-0	ws82-14	NOTEST	0.0239192	0.0215365	-0.151385	0.0523442	0.958254	1	no
Glyma01g07278	Glyma01g07278	Glyma01g07278	Gm01:7894471-7899056	ws82-0	ws82-14	NOTEST	0	0	0	0	1	1	no
Glyma01g07300	Glyma01g07300	Glyma01g07300	Gm01:7959018-7960497	ws82-0	ws82-14	OK	0.974011	0.589969	-0.723299	0.930854	0.351929	0.817373	no
Glyma01g07310	Glyma01g07310	Glyma01g07310	Gm01:7961184-7963298	ws82-0	ws82-14	OK	1.77537	1.72217	-0.0438908	0.0579143	0.953817	0.997364	no
Glyma01g07320	Glyma01g07320	Glyma01g07320	Gm01:7976530-7977692	ws82-0	ws82-14	NOTEST	0	0	0	0	1	1	no
Glyma01g07343	Glyma01g07343	Glyma01g07343	Gm01:8062113-8062653	ws82-0	ws82-14	NOTEST	0	0	0	0	1	1	no
Glyma01g07366	Glyma01g07366	Glyma01g07366	Gm01:8067733-8073984	ws82-0	ws82-14	NOTEST	0	0	0	0	1	1	no
Glyma01g07390	Glyma01g07390	Glyma01g07390	Gm01:8081945-8087022	ws82-0	ws82-14	OK	6.35256	0.681187	-3.22121	5.39299	6.92958e-08	9.93969e-06	yes
Glyma01g07416	Glyma01g07416	Glyma01g07416	Gm01:8182612-8184549	ws82-0	ws82-14	NOTEST	0	0	0	0	1	1	no
Glyma01g07443	Glyma01g07443	Glyma01g07443	Gm01:8199812-8203907	ws82-0	ws82-14	NOTEST	0	0	0	0	1	1	no
Glyma01g07470	Glyma01g07470	Glyma01g07470	Gm01:8280629-8281870	ws82-0	ws82-14	NOTEST	0	0	0	0	1	1	no
Glyma01g07500	Glyma01g07500	Glyma01g07500	Gm01:8288472-8290635	ws82-0	ws82-14	NOTEST	0	0	0	0	1	1	no
Glyma01g07530	Glyma01g07530	Glyma01g07530	Gm01:8321044-8331324	ws82-0	ws82-14	OK	3.78669	2.73177	-0.4711	0.980327	0.326925	0.797951	no
Glyma01g07542	Glyma01g07542	Glyma01g07542	Gm01:8338977-8341376	ws82-0	ws82-14	OK	0.506818	0.295014	-0.780687	0.867036	0.385922	0.838815	no
Glyma01g07554	Glyma01g07554	Glyma01g07554	Gm01:8344184-8347552	ws82-0	ws82-14	OK	30.4431	21.5238	-0.500183	1.12147	0.262089	0.737957	no
Glyma01g07567	Glyma01g07567	Glyma01g07567	Gm01:8348953-8350397	ws82-0	ws82-14	OK	0.485835	1.22295	1.33183	-1.7176	0.0858689	0.436795	no
Glyma01g07580	Glyma01g07580	Glyma01g07580	Gm01:8387061-8389448	ws82-0	ws82-14	OK	21.2822	12.043	-0.821453	1.83261	0.066861	0.385105	no
Glyma01g07601	Glyma01g07601	Glyma01g07601	Gm01:8400738-8401869	ws82-0	ws82-14	OK	0.455002	0.0807486	-2.49436	1.53744	0.124186	0.53281	no
Glyma01g07621	Glyma01g07621	Glyma01g07621	Gm01:8410014-8411417	ws82-0	ws82-14	NOTEST	0	0	0	0	1	1	no
Glyma01g07641	Glyma01g07641	Glyma01g07641	Gm01:8426105-8455213	ws82-0	ws82-14	OK	5.24495	4.09762	-0.356142	0.786148	0.431781	0.864358	no
Glyma01g07661	Glyma01g07661	Glyma01g07661	Gm01:8426105-8455213	ws82-0	ws82-14	NOTEST	0.253899	0	-1.79769e+308	-1.79769e+308	0.222652	1	no
Glyma01g07680	Glyma01g07680	Glyma01g07680	Gm01:8471437-8478753	ws82-0	ws82-14	OK	3.35798	4.11276	0.292513	-0.656739	0.511349	0.898151	no
Glyma01g07690	Glyma01g07690	Glyma01g07690	Gm01:8483094-8485802	ws82-0	ws82-14	OK	2.08029	1.133	-0.876634	1.63797	0.101428	0.482237	no
Glyma01g07716	Glyma01g07716	Glyma01g07716	Gm01:8488370-8491061	ws82-0	ws82-14	NOTEST	0	0	0	0	1	1	no
Glyma01g07743	Glyma01g07743	Glyma01g07743	Gm01:8512443-8513748	ws82-0	ws82-14	NOTEST	0	0	0	0	1	1	no
Glyma01g07770	Glyma01g07770	Glyma01g07770	Gm01:8571080-8576705	ws82-0	ws82-14	OK	27.9495	19.4974	-0.519538	1.16952	0.242195	0.715118	no
Glyma01g07780	Glyma01g07780	Glyma01g07780	Gm01:8580150-8584320	ws82-0	ws82-14	OK	0.245846	0.860485	1.8074	-2.39136	0.0167861	0.166043	no
Glyma01g07791	Glyma01g07791	Glyma01g07791	Gm01:8585310-8588909	ws82-0	ws82-14	OK	0.657695	0.427629	-0.621059	0.830521	0.406244	0.851253	no
Glyma01g07800	Glyma01g07800	Glyma01g07800	Gm01:8594093-8595436	ws82-0	ws82-14	OK	11.4578	8.17922	-0.486297	1.05412	0.29183	0.766956	no
Glyma01g07860	Glyma01g07860	Glyma01g07860	Gm01:8667868-8673493	ws82-0	ws82-14	OK	0.123613	8.14496	6.04201	-8.20087	2.22045e-16	2.2693e-13	yes
Glyma01g07876	Glyma01g07876	Glyma01g07876	Gm01:8788410-8789743	ws82-0	ws82-14	NOTEST	0.0255076	0	-1.79769e+308	-1.79769e+308	0.279528	1	no
Glyma01g07893	Glyma01g07893	Glyma01g07893	Gm01:8792135-8793707	ws82-0	ws82-14	NOTEST	0	0	0	0	1	1	no
Glyma01g07910	Glyma01g07910	Glyma01g07910	Gm01:8838722-8843110	ws82-0	ws82-14	NOTEST	0	0	0	0	1	1	no
Glyma01g07930	Glyma01g07930	Glyma01g07930	Gm01:8874759-8878203	ws82-0	ws82-14	OK	14.7815	19.2642	0.382129	-0.86049	0.389519	0.840948	no
Glyma01g07940	Glyma01g07940	Glyma01g07940	Gm01:8910470-8913789	ws82-0	ws82-14	OK	1.21323	2.56423	1.07968	-1.83488	0.0665239	0.384177	no
Glyma01g07970	Glyma01g07970	Glyma01g07970	Gm01:8936938-8942561	ws82-0	ws82-14	NOTEST	0	0	0	0	1	1	no
Glyma01g07985	Glyma01g07985	Glyma01g07985	Gm01:8949064-8950284	ws82-0	ws82-14	NOTEST	0	0	0	0	1	1	no
Glyma01g08001	Glyma01g08001	Glyma01g08001	Gm01:8978273-8979785	ws82-0	ws82-14	NOTEST	0	0	0	0	1	1	no
Glyma01g08015	Glyma01g08015	Glyma01g08015	Gm01:8998365-8999926	ws82-0	ws82-14	NOTEST	0	0	0	0	1	1	no
Glyma01g08030	Glyma01g08030	Glyma01g08030	Gm01:9017676-9019966	ws82-0	ws82-14	NOTEST	0	0	0	0	1	1	no
Glyma01g08043	Glyma01g08043	Glyma01g08043	Gm01:9021976-9042121	ws82-0	ws82-14	OK	1.02065	0.974895	-0.0661751	0.126314	0.899483	0.990836	no
Glyma01g08056	Glyma01g08056	Glyma01g08056	Gm01:9051046-9057050	ws82-0	ws82-14	OK	4.35425	1.98017	-1.1368	2.04077	0.0412736	0.288207	no
Glyma01g08070	Glyma01g08070	Glyma01g08070	Gm01:9109611-9110650	ws82-0	ws82-14	NOTEST	0	0	0	0	1	1	no
Glyma01g08080	Glyma01g08080	Glyma01g08080	Gm01:9174134-9176210	ws82-0	ws82-14	OK	2.78895	1.03931	-1.4241	2.45127	0.0142355	0.149456	no
Glyma01g08096	Glyma01g08096	Glyma01g08096	Gm01:9198539-9199466	ws82-0	ws82-14	NOTEST	0	0	0	0	1	1	no
Glyma01g08113	Glyma01g08113	Glyma01g08113	Gm01:9252869-9254570	ws82-0	ws82-14	NOTEST	0	0	0	0	1	1	no
Glyma01g08130	Glyma01g08130	Glyma01g08130	Gm01:9331637-9344994	ws82-0	ws82-14	NOTEST	0	0	0	0	1	1	no
Glyma01g08150	Glyma01g08150	Glyma01g08150	Gm01:9446809-9451393	ws82-0	ws82-14	NOTEST	0.111779	0.346852	1.63368	-1.6009	0.109399	1	no
Glyma01g08191	Glyma01g08191	Glyma01g08191	Gm01:9525972-9529696	ws82-0	ws82-14	NOTEST	0	0	0	0	1	1	no
Glyma01g08230	Glyma01g08230	Glyma01g08230	Gm01:9575252-9581967	ws82-0	ws82-14	OK	5.34579	6.40544	0.260895	-0.569835	0.568789	0.920492	no
Glyma01g08250	Glyma01g08250	Glyma01g08250	Gm01:9636460-9637409	ws82-0	ws82-14	NOTEST	0	0	0	0	1	1	no
Glyma01g08260	Glyma01g08260	Glyma01g08260	Gm01:9642089-9646537	ws82-0	ws82-14	OK	0.776337	1.63883	1.07791	-1.42291	0.154763	0.593575	no
Glyma01g08400	Glyma01g08400	Glyma01g08400	Gm01:9844796-9845510	ws82-0	ws82-14	NOTEST	0	0.368744	1.79769e+308	1.79769e+308	0.082025	1	no
Glyma01g08540	Glyma01g08540	Glyma01g08540	Gm01:9914169-9919593	ws82-0	ws82-14	OK	5.23518	7.88917	0.591635	-1.25334	0.210082	0.674877	no
Glyma01g08560	Glyma01g08560	Glyma01g08560	Gm01:9947412-9949603	ws82-0	ws82-14	NOTEST	0	0	0	0	1	1	no
Glyma01g08580	Glyma01g08580	Glyma01g08580	Gm01:9980287-9986041	ws82-0	ws82-14	OK	10.2424	11.4101	0.155764	-0.349381	0.726803	0.965229	no
Glyma01g08586	Glyma01g08586	Glyma01g08586	Gm01:10000985-10002625	ws82-0	ws82-14	NOTEST	0	0	0	0	1	1	no
Glyma01g08593	Glyma01g08593	Glyma01g08593	Gm01:10003770-10020103	ws82-0	ws82-14	NOTEST	0	0	0	0	1	1	no
Glyma01g08600	Glyma01g08600	Glyma01g08600	Gm01:10022026-10027778	ws82-0	ws82-14	OK	12.9373	12.5146	-0.0479277	0.100981	0.919566	0.993278	no
Glyma01g08610	Glyma01g08610	Glyma01g08610	Gm01:10032095-10036624	ws82-0	ws82-14	NOTEST	0.0468505	0.044573	-0.0718957	0.0351562	0.971955	1	no
Glyma01g08621	Glyma01g08621	Glyma01g08621	Gm01:10051789-10059800	ws82-0	ws82-14	NOTEST	0	0	0	0	1	1	no
Glyma01g08631	Glyma01g08631	Glyma01g08631	Gm01:10051789-10059800	ws82-0	ws82-14	NOTEST	0.0571418	0.0575627	0.0105897	-0.00656908	0.994759	1	no
Glyma01g08640	Glyma01g08640	Glyma01g08640	Gm01:10086673-10091927	ws82-0	ws82-14	NOTEST	0.0339601	0.128318	1.91782	-1.54985	0.121177	1	no
Glyma01g08650	Glyma01g08650	Glyma01g08650	Gm01:10086673-10091927	ws82-0	ws82-14	NOTEST	0.197301	0.10262	-0.94309	0.370309	0.711152	1	no
Glyma01g08690	Glyma01g08690	Glyma01g08690	Gm01:10142572-10144504	ws82-0	ws82-14	NOTEST	0	0	0	0	1	1	no
Glyma01g08730	Glyma01g08730	Glyma01g08730	Gm01:10288660-10290556	ws82-0	ws82-14	NOTEST	0	0	0	0	1	1	no
Glyma01g08745	Glyma01g08745	Glyma01g08745	Gm01:10293654-10294541	ws82-0	ws82-14	NOTEST	0	0	0	0	1	1	no
Glyma01g08760	Glyma01g08760	Glyma01g08760	Gm01:10355582-10357514	ws82-0	ws82-14	NOTEST	0	0	0	0	1	1	no
Glyma01g08870	Glyma01g08870	Glyma01g08870	Gm01:10370136-10371995	ws82-0	ws82-14	NOTEST	0	0	0	0	1	1	no
Glyma01g08980	Glyma01g08980	Glyma01g08980	Gm01:10504878-10510246	ws82-0	ws82-14	NOTEST	0	0	0	0	1	1	no
Glyma01g09000	Glyma01g09000	Glyma01g09000	Gm01:10570987-10572412	ws82-0	ws82-14	NOTEST	0	0	0	0	1	1	no
Glyma01g09010	Glyma01g09010	Glyma01g09010	Gm01:10577946-10583595	ws82-0	ws82-14	OK	10.0282	9.3653	-0.0986729	0.191405	0.848209	0.983438	no
Glyma01g09040	Glyma01g09040	Glyma01g09040	Gm01:10601638-10602621	ws82-0	ws82-14	NOTEST	0	0	0	0	1	1	no
Glyma01g09066	Glyma01g09066	Glyma01g09066	Gm01:10604268-10604624	ws82-0	ws82-14	NOTEST	0	0	0	0	1	1	no
Glyma01g09093	Glyma01g09093	Glyma01g09093	Gm01:10716118-10717174	ws82-0	ws82-14	NOTEST	0	0	0	0	1	1	no
Glyma01g09120	Glyma01g09120	Glyma01g09120	Gm01:10765526-10768563	ws82-0	ws82-14	OK	13.3266	8.38952	-0.667643	1.49603	0.134647	0.554736	no
Glyma01g09160	Glyma01g09160	Glyma01g09160	Gm01:10877246-10880169	ws82-0	ws82-14	OK	3.535	4.19953	0.248516	-0.506009	0.612851	0.934704	no
Glyma01g09190	Glyma01g09190	Glyma01g09190	Gm01:10916139-10919654	ws82-0	ws82-14	NOTEST	0	0	0	0	1	1	no
Glyma01g09205	Glyma01g09205	Glyma01g09205	Gm01:10925539-10932891	ws82-0	ws82-14	OK	0.56396	0.4849	-0.217907	0.219743	0.826072	0.979885	no
Glyma01g09220	Glyma01g09220	Glyma01g09220	Gm01:10985768-10988999	ws82-0	ws82-14	OK	3.89684	3.06495	-0.34644	0.676986	0.498415	0.893638	no
Glyma01g09251	Glyma01g09251	Glyma01g09251	Gm01:11062433-11064112	ws82-0	ws82-14	NOTEST	0	0	0	0	1	1	no
Glyma01g09280	Glyma01g09280	Glyma01g09280	Gm01:11172148-11173850	ws82-0	ws82-14	NOTEST	0	0	0	0	1	1	no
Glyma01g09290	Glyma01g09290	Glyma01g09290	Gm01:11208547-11216038	ws82-0	ws82-14	OK	2.57432	3.06422	0.25133	-0.468109	0.639707	0.943576	no
Glyma01g09310	Glyma01g09310	Glyma01g09310	Gm01:11247803-11256961	ws82-0	ws82-14	OK	21.3761	17.8061	-0.263628	0.574524	0.565613	0.91958	no
Glyma01g09340	Glyma01g09340	Glyma01g09340	Gm01:11290152-11290409	ws82-0	ws82-14	NOTEST	0	0	0	0	1	1	no
Glyma01g09350	Glyma01g09350	Glyma01g09350	Gm01:11294639-11296592	ws82-0	ws82-14	NOTEST	0.0382627	0	-1.79769e+308	-1.79769e+308	0.155783	1	no
Glyma01g09360	Glyma01g09360	Glyma01g09360	Gm01:11308064-11312690	ws82-0	ws82-14	OK	3.01705	2.28964	-0.398019	0.684159	0.493875	0.89256	no
Glyma01g09381	Glyma01g09381	Glyma01g09381	Gm01:11366555-11369128	ws82-0	ws82-14	NOTEST	0	0	0	0	1	1	no
Glyma01g09400	Glyma01g09400	Glyma01g09400	Gm01:11464172-11469476	ws82-0	ws82-14	OK	4.47889	4.70905	0.0722965	-0.14678	0.883306	0.988047	no
Glyma01g09410	Glyma01g09410	Glyma01g09410	Gm01:11464172-11469476	ws82-0	ws82-14	NOTEST	0	0	0	0	1	1	no
Glyma01g09420	Glyma01g09420	Glyma01g09420	Gm01:11496634-11503018	ws82-0	ws82-14	OK	2.19731	2.91041	0.405485	-0.789075	0.430068	0.863883	no
Glyma01g09460	Glyma01g09460	Glyma01g09460	Gm01:11555183-11556227	ws82-0	ws82-14	OK	1.89628	2.4482	0.368544	-0.520551	0.60268	0.93018	no
Glyma01g09481	Glyma01g09481	Glyma01g09481	Gm01:11560220-11561128	ws82-0	ws82-14	NOTEST	0	0	0	0	1	1	no
Glyma01g09500	Glyma01g09500	Glyma01g09500	Gm01:11608787-11608970	ws82-0	ws82-14	NOTEST	0	0	0	0	1	1	no
Glyma01g09510	Glyma01g09510	Glyma01g09510	Gm01:11675230-11676337	ws82-0	ws82-14	NOTEST	0.109571	0.100723	-0.121476	0.0840049	0.933053	1	no
Glyma01g09515	Glyma01g09515	Glyma01g09515	Gm01:11687514-11688465	ws82-0	ws82-14	NOTEST	0	0	0	0	1	1	no
Glyma01g09520	Glyma01g09520	Glyma01g09520	Gm01:11695475-11701510	ws82-0	ws82-14	OK	13.4987	14.9628	0.148558	-0.333055	0.739093	0.968432	no
Glyma01g09530	Glyma01g09530	Glyma01g09530	Gm01:11703243-11703468	ws82-0	ws82-14	OK	8.31185	26.3522	1.66468	-1.38674	0.165521	0.606506	no
Glyma01g09540	Glyma01g09540	Glyma01g09540	Gm01:11708034-11708550	ws82-0	ws82-14	NOTEST	0	0	0	0	1	1	no
Glyma01g09581	Glyma01g09581	Glyma01g09581	Gm01:11738401-11738872	ws82-0	ws82-14	NOTEST	0	0	0	0	1	1	no
Glyma01g09620	Glyma01g09620	Glyma01g09620	Gm01:11916861-11920298	ws82-0	ws82-14	NOTEST	0	0	0	0	1	1	no
Glyma01g09631	Glyma01g09631	Glyma01g09631	Gm01:11934522-11935027	ws82-0	ws82-14	NOTEST	0	0	0	0	1	1	no
Glyma01g09640	Glyma01g09640	Glyma01g09640	Gm01:11967121-11968573	ws82-0	ws82-14	OK	4.55094	1.91331	-1.25009	2.25319	0.0242473	0.210452	no
Glyma01g09650	Glyma01g09650	Glyma01g09650	Gm01:11971139-11974007	ws82-0	ws82-14	OK	1.54454	1.1922	-0.37355	0.543792	0.586584	0.925515	no
Glyma01g09660	Glyma01g09660	Glyma01g09660	Gm01:11996466-12008222	ws82-0	ws82-14	OK	1.95093	0.972685	-1.00412	1.75523	0.0792193	0.421061	no
Glyma01g09860	Glyma01g09860	Glyma01g09860	Gm01:12384414-12385443	ws82-0	ws82-14	NOTEST	0	0	0	0	1	1	no
Glyma01g09900	Glyma01g09900	Glyma01g09900	Gm01:12528614-12537191	ws82-0	ws82-14	OK	0.934067	0.481511	-0.955957	1.27883	0.200957	0.661976	no
Glyma01g09920	Glyma01g09920	Glyma01g09920	Gm01:12588417-12590126	ws82-0	ws82-14	OK	4.29089	3.43156	-0.322413	0.610192	0.541735	0.910572	no
Glyma01g09948	Glyma01g09948	Glyma01g09948	Gm01:12598148-12598766	ws82-0	ws82-14	NOTEST	0	0	0	0	1	1	no
Glyma01g09976	Glyma01g09976	Glyma01g09976	Gm01:12599050-12599537	ws82-0	ws82-14	NOTEST	0	0	0	0	1	1	no
Glyma01g10004	Glyma01g10004	Glyma01g10004	Gm01:12745024-12746402	ws82-0	ws82-14	NOTEST	0	0	0	0	1	1	no
Glyma01g10032	Glyma01g10032	Glyma01g10032	Gm01:12760733-12762383	ws82-0	ws82-14	NOTEST	0	0	0	0	1	1	no
Glyma01g10060	Glyma01g10060	Glyma01g10060	Gm01:12803637-12806519	ws82-0	ws82-14	NOTEST	0	0	0	0	1	1	no
Glyma01g10070	Glyma01g10070	Glyma01g10070	Gm01:12864161-12867113	ws82-0	ws82-14	LOWDATA	0	0	0.461055	0	1	1	no
Glyma01g10081	Glyma01g10081	Glyma01g10081	Gm01:12864161-12867113	ws82-0	ws82-14	OK	128.425	176.783	0.461055	-0.878907	0.379452	0.83487	no
Glyma01g10090	Glyma01g10090	Glyma01g10090	Gm01:12870303-12870537	ws82-0	ws82-14	NOTEST	0	0	0	0	1	1	no
Glyma01g10100	Glyma01g10100	Glyma01g10100	Gm01:12915879-12921146	ws82-0	ws82-14	OK	0.922622	1.3559	0.555435	-0.969435	0.332328	0.803323	no
Glyma01g10121	Glyma01g10121	Glyma01g10121	Gm01:13008740-13009964	ws82-0	ws82-14	OK	0.534239	0.079973	-2.7399	1.70133	0.0888808	0.445175	no
Glyma01g10141	Glyma01g10141	Glyma01g10141	Gm01:13045087-13045509	ws82-0	ws82-14	NOTEST	0	0	0	0	1	1	no
Glyma01g10160	Glyma01g10160	Glyma01g10160	Gm01:13068289-13070591	ws82-0	ws82-14	OK	1.94547	1.38995	-0.485081	0.687934	0.491494	0.892104	no
Glyma01g10183	Glyma01g10183	Glyma01g10183	Gm01:13094881-13100738	ws82-0	ws82-14	NOTEST	0	0	0	0	1	1	no
Glyma01g10206	Glyma01g10206	Glyma01g10206	Gm01:13259515-13263715	ws82-0	ws82-14	NOTEST	0	0	0	0	1	1	no
Glyma01g10231	Glyma01g10231	Glyma01g10231	Gm01:13305441-13308517	ws82-0	ws82-14	NOTEST	0	0	0	0	1	1	no
Glyma01g10254	Glyma01g10254	Glyma01g10254	Gm01:13309389-13321481	ws82-0	ws82-14	NOTEST	0	0	0	0	1	1	no
Glyma01g10278	Glyma01g10278	Glyma01g10278	Gm01:13324783-13327645	ws82-0	ws82-14	NOTEST	0	0	0	0	1	1	no
Glyma01g10302	Glyma01g10302	Glyma01g10302	Gm01:13355409-13356481	ws82-0	ws82-14	NOTEST	0	0	0	0	1	1	no
Glyma01g10326	Glyma01g10326	Glyma01g10326	Gm01:13416710-13417813	ws82-0	ws82-14	NOTEST	0	0	0	0	1	1	no
Glyma01g10350	Glyma01g10350	Glyma01g10350	Gm01:13419562-13420937	ws82-0	ws82-14	NOTEST	0	0	0	0	1	1	no
Glyma01g10371	Glyma01g10371	Glyma01g10371	Gm01:13433576-13434202	ws82-0	ws82-14	OK	3.04135	1.79305	-0.762294	1.11207	0.266107	0.741186	no
Glyma01g10390	Glyma01g10390	Glyma01g10390	Gm01:13444506-13445181	ws82-0	ws82-14	NOTEST	0.343959	0.328742	-0.06528	0.0451434	0.963993	1	no
Glyma01g10600	Glyma01g10600	Glyma01g10600	Gm01:13782194-13783121	ws82-0	ws82-14	NOTEST	0	0	0	0	1	1	no
Glyma01g10610	Glyma01g10610	Glyma01g10610	Gm01:13795843-13799755	ws82-0	ws82-14	OK	3.56397	3.15788	-0.174529	0.358962	0.719623	0.964414	no
Glyma01g10730	Glyma01g10730	Glyma01g10730	Gm01:13960625-13962588	ws82-0	ws82-14	NOTEST	0.247476	0.386361	0.642659	-0.648813	0.516459	1	no
Glyma01g10850	Glyma01g10850	Glyma01g10850	Gm01:14070871-14087892	ws82-0	ws82-14	OK	4.42517	2.48751	-0.83103	1.64215	0.100558	0.479522	no
Glyma01g10880	Glyma01g10880	Glyma01g10880	Gm01:14112119-14118766	ws82-0	ws82-14	OK	2.06643	3.36647	0.7041	-1.31637	0.188051	0.643779	no
Glyma01g10900	Glyma01g10900	Glyma01g10900	Gm01:14129302-14130710	ws82-0	ws82-14	NOTEST	0	0	0	0	1	1	no
Glyma01g11110	Glyma01g11110	Glyma01g11110	Gm01:14247142-14248189	ws82-0	ws82-14	NOTEST	0.0524116	0	-1.79769e+308	-1.79769e+308	0.155783	1	no
Glyma01g11130	Glyma01g11130	Glyma01g11130	Gm01:14320794-14324110	ws82-0	ws82-14	NOTEST	0.202791	0.189689	-0.0963593	0.0924221	0.926363	1	no
Glyma01g11180	Glyma01g11180	Glyma01g11180	Gm01:14568533-14568824	ws82-0	ws82-14	OK	28587.4	22069.5	-0.373322	0.561317	0.574582	0.922637	no
Glyma01g11390	Glyma01g11390	Glyma01g11390	Gm01:14807028-14809655	ws82-0	ws82-14	OK	22.1188	16.5446	-0.418914	0.903362	0.366334	0.827045	no
Glyma01g11473	Glyma01g11473	Glyma01g11473	Gm01:14947313-14947773	ws82-0	ws82-14	NOTEST	0	0	0	0	1	1	no
Glyma01g11556	Glyma01g11556	Glyma01g11556	Gm01:14947841-14948129	ws82-0	ws82-14	NOTEST	0	0	0	0	1	1	no
Glyma01g11640	Glyma01g11640	Glyma01g11640	Gm01:14972818-14973806	ws82-0	ws82-14	OK	87.8699	92.006	0.0663593	-0.144762	0.884899	0.988365	no
Glyma01g11755	Glyma01g11755	Glyma01g11755	Gm01:15083417-15085790	ws82-0	ws82-14	NOTEST	0	0	0	0	1	1	no
Glyma01g11870	Glyma01g11870	Glyma01g11870	Gm01:15195053-15195880	ws82-0	ws82-14	OK	820.313	59.25	-3.79129	7.37212	1.67866e-13	1.05575e-10	yes
Glyma01g12310	Glyma01g12310	Glyma01g12310	Gm01:15500343-15500912	ws82-0	ws82-14	NOTEST	0	0	0	0	1	1	no
Glyma01g12340	Glyma01g12340	Glyma01g12340	Gm01:15542210-15548262	ws82-0	ws82-14	OK	11.7599	11.8879	0.0156262	-0.0334616	0.973306	0.997956	no
Glyma01g12740	Glyma01g12740	Glyma01g12740	Gm01:15937028-15939729	ws82-0	ws82-14	OK	20.0564	3.50381	-2.51707	5.47667	4.33404e-08	6.738e-06	yes
Glyma01g12840	Glyma01g12840	Glyma01g12840	Gm01:15948220-15953470	ws82-0	ws82-14	OK	0.41819	0.491546	0.23317	-0.224428	0.822424	0.979472	no
Glyma01g12940	Glyma01g12940	Glyma01g12940	Gm01:16087453-16089518	ws82-0	ws82-14	OK	0.98427	1.10843	0.171391	-0.253157	0.800147	0.976114	no
Glyma01g12955	Glyma01g12955	Glyma01g12955	Gm01:16103170-16106499	ws82-0	ws82-14	NOTEST	0	0	0	0	1	1	no
Glyma01g12970	Glyma01g12970	Glyma01g12970	Gm01:16134796-16136261	ws82-0	ws82-14	OK	14.1434	7.6429	-0.887932	1.96695	0.0491893	0.320488	no
Glyma01g13170	Glyma01g13170	Glyma01g13170	Gm01:16335425-16339127	ws82-0	ws82-14	OK	42.7219	80.9763	0.922525	-1.85063	0.0642231	0.376285	no
Glyma01g13390	Glyma01g13390	Glyma01g13390	Gm01:16722784-16724403	ws82-0	ws82-14	NOTEST	0	0	0	0	1	1	no
Glyma01g13400	Glyma01g13400	Glyma01g13400	Gm01:16727753-16728455	ws82-0	ws82-14	NOTEST	0	0	0	0	1	1	no
Glyma01g13410	Glyma01g13410	Glyma01g13410	Gm01:16732842-16733939	ws82-0	ws82-14	NOTEST	0.0905487	0.0423781	-1.09538	0.615623	0.538143	1	no
Glyma01g13532	Glyma01g13532	Glyma01g13532	Gm01:16745457-16750194	ws82-0	ws82-14	OK	0.270077	0.533802	0.982937	-0.798426	0.424624	0.860984	no
Glyma01g13654	Glyma01g13654	Glyma01g13654	Gm01:16827427-16868761	ws82-0	ws82-14	OK	3.37737	2.84233	-0.248824	0.479715	0.63143	0.941134	no
Glyma01g13777	Glyma01g13777	Glyma01g13777	Gm01:16940733-16941754	ws82-0	ws82-14	NOTEST	0	0	0	0	1	1	no
Glyma01g13900	Glyma01g13900	Glyma01g13900	Gm01:17306260-17308391	ws82-0	ws82-14	NOTEST	0	0.0304166	1.79769e+308	1.79769e+308	0.162559	1	no
Glyma01g13930	Glyma01g13930	Glyma01g13930	Gm01:17320003-17321677	ws82-0	ws82-14	NOTEST	0.154692	0.347253	1.16658	-1.22966	0.218825	1	no
Glyma01g13945	Glyma01g13945	Glyma01g13945	Gm01:17420498-17470577	ws82-0	ws82-14	NOTEST	0.414738	0.191209	-1.11705	1.23761	0.215862	1	no
Glyma01g13960	Glyma01g13960	Glyma01g13960	Gm01:17481711-17482061	ws82-0	ws82-14	NOTEST	0	0	0	0	1	1	no
Glyma01g14160	Glyma01g14160	Glyma01g14160	Gm01:17627819-17629241	ws82-0	ws82-14	NOTEST	0	0	0	0	1	1	no
Glyma01g14266	Glyma01g14266	Glyma01g14266	Gm01:17633685-17639586	ws82-0	ws82-14	NOTEST	0	0	0	0	1	1	no
Glyma01g14373	Glyma01g14373	Glyma01g14373	Gm01:18006948-18034570	ws82-0	ws82-14	OK	4.25579	4.84733	0.187765	-0.414408	0.678575	0.952534	no
Glyma01g14480	Glyma01g14480	Glyma01g14480	Gm01:18042133-18046082	ws82-0	ws82-14	OK	27.0571	21.8527	-0.308199	0.690919	0.489616	0.8912	no
Glyma01g14500	Glyma01g14500	Glyma01g14500	Gm01:18130228-18132625	ws82-0	ws82-14	NOTEST	0	0	0	0	1	1	no
Glyma01g14700	Glyma01g14700	Glyma01g14700	Gm01:18300892-18301399	ws82-0	ws82-14	OK	2.35757	2.38368	0.0158922	-0.0214306	0.982902	0.99888	no
Glyma01g14733	Glyma01g14733	Glyma01g14733	Gm01:18318922-18323085	ws82-0	ws82-14	OK	0.455782	0.536929	0.236387	-0.322818	0.746833	0.968877	no
Glyma01g14766	Glyma01g14766	Glyma01g14766	Gm01:18346082-18347761	ws82-0	ws82-14	NOTEST	0.3219	0.407727	0.34099	-0.412933	0.679656	1	no
Glyma01g14800	Glyma01g14800	Glyma01g14800	Gm01:18356149-18373966	ws82-0	ws82-14	OK	3.03829	2.75263	-0.142451	0.265158	0.790888	0.974423	no
Glyma01g14905	Glyma01g14905	Glyma01g14905	Gm01:18507857-18508875	ws82-0	ws82-14	NOTEST	0	0	0	0	1	1	no
Glyma01g15010	Glyma01g15010	Glyma01g15010	Gm01:18517441-18518370	ws82-0	ws82-14	NOTEST	0	0	0	0	1	1	no
Glyma01g15134	Glyma01g15134	Glyma01g15134	Gm01:18526281-18533321	ws82-0	ws82-14	OK	1.28863	0.886686	-0.539349	0.848461	0.396181	0.844948	no
Glyma01g15258	Glyma01g15258	Glyma01g15258	Gm01:18637238-18640215	ws82-0	ws82-14	NOTEST	0.0325809	0.0632195	0.956344	-0.542524	0.587457	1	no
Glyma01g15382	Glyma01g15382	Glyma01g15382	Gm01:18694961-18695204	ws82-0	ws82-14	NOTEST	0	0	0	0	1	1	no
Glyma01g15506	Glyma01g15506	Glyma01g15506	Gm01:18952413-18962622	ws82-0	ws82-14	OK	28.0472	31.2571	0.156328	-0.306404	0.759297	0.970744	no
Glyma01g15630	Glyma01g15630	Glyma01g15630	Gm01:19254139-19255483	ws82-0	ws82-14	NOTEST	0.286832	0.0536128	-2.41956	1.49133	0.135875	1	no
Glyma01g15687	Glyma01g15687	Glyma01g15687	Gm01:19474756-19475786	ws82-0	ws82-14	NOTEST	0	0	0	0	1	1	no
Glyma01g15744	Glyma01g15744	Glyma01g15744	Gm01:19561924-19565934	ws82-0	ws82-14	NOTEST	0	0	0	0	1	1	no
Glyma01g15802	Glyma01g15802	Glyma01g15802	Gm01:19569955-19570642	ws82-0	ws82-14	NOTEST	0	0	0	0	1	1	no
Glyma01g15860	Glyma01g15860	Glyma01g15860	Gm01:19642510-19643505	ws82-0	ws82-14	NOTEST	0	0	0	0	1	1	no
Glyma01g15883	Glyma01g15883	Glyma01g15883	Gm01:19661251-19662687	ws82-0	ws82-14	NOTEST	0	0	0	0	1	1	no
Glyma01g15906	Glyma01g15906	Glyma01g15906	Gm01:19730841-19731653	ws82-0	ws82-14	NOTEST	0	0	0	0	1	1	no
Glyma01g15930	Glyma01g15930	Glyma01g15930	Gm01:19793857-19799930	ws82-0	ws82-14	OK	28.3402	33.2647	0.231143	-0.499153	0.617672	0.935945	no
Glyma01g16140	Glyma01g16140	Glyma01g16140	Gm01:20041371-20043743	ws82-0	ws82-14	OK	2.74992	14.2005	2.36848	-4.47673	7.57959e-06	0.000498759	yes
Glyma01g16250	Glyma01g16250	Glyma01g16250	Gm01:20048200-20050535	ws82-0	ws82-14	NOTEST	0	0	0	0	1	1	no
Glyma01g16360	Glyma01g16360	Glyma01g16360	Gm01:20233418-20235447	ws82-0	ws82-14	OK	6.72305	2.21748	-1.60019	2.62699	0.00861445	0.107416	no
Glyma01g16370	Glyma01g16370	Glyma01g16370	Gm01:20243646-20255339	ws82-0	ws82-14	OK	5.07768	3.79339	-0.42068	0.889537	0.373715	0.831028	no
Glyma01g16375	Glyma01g16375	Glyma01g16375	Gm01:20243646-20255339	ws82-0	ws82-14	OK	2.67738	3.09897	0.210967	-0.102254	0.918555	0.993185	no
Glyma01g16380	Glyma01g16380	Glyma01g16380	Gm01:20340974-20356558	ws82-0	ws82-14	OK	18.1415	21.5627	0.249245	-0.553215	0.580116	0.924204	no
Glyma01g16526	Glyma01g16526	Glyma01g16526	Gm01:20473820-20507463	ws82-0	ws82-14	OK	4.66132	4.99518	0.0997974	-0.182591	0.855119	0.98446	no
Glyma01g16673	Glyma01g16673	Glyma01g16673	Gm01:20473820-20507463	ws82-0	ws82-14	NOTEST	0.148645	0.149565	0.00890143	-0.00394514	0.996852	1	no
Glyma01g16820	Glyma01g16820	Glyma01g16820	Gm01:20713503-20720624	ws82-0	ws82-14	OK	3.80152	4.26992	0.167632	-0.355443	0.722258	0.964414	no
Glyma01g17030	Glyma01g17030	Glyma01g17030	Gm01:21011809-21014457	ws82-0	ws82-14	OK	0.412404	0.468119	0.182816	-0.198541	0.842622	0.982448	no
Glyma01g17230	Glyma01g17230	Glyma01g17230	Gm01:21161585-21162372	ws82-0	ws82-14	OK	9.83432	8.33692	-0.238311	0.470369	0.638091	0.942784	no
Glyma01g17240	Glyma01g17240	Glyma01g17240	Gm01:21232889-21235373	ws82-0	ws82-14	OK	0.870574	0.562812	-0.629314	0.806256	0.420095	0.859372	no
Glyma01g17271	Glyma01g17271	Glyma01g17271	Gm01:21300956-21302664	ws82-0	ws82-14	NOTEST	0	0	0	0	1	1	no
Glyma01g17300	Glyma01g17300	Glyma01g17300	Gm01:21447376-21448520	ws82-0	ws82-14	OK	53.3794	32.749	-0.704832	1.5494	0.121285	0.527132	no
Glyma01g17330	Glyma01g17330	Glyma01g17330	Gm01:21487778-21490647	ws82-0	ws82-14	NOTEST	0	0	0	0	1	1	no
Glyma01g17350	Glyma01g17350	Glyma01g17350	Gm01:21601999-21604652	ws82-0	ws82-14	OK	4.35063	3.22451	-0.432145	0.925625	0.354641	0.819236	no
Glyma01g17426	Glyma01g17426	Glyma01g17426	Gm01:21677182-21677611	ws82-0	ws82-14	NOTEST	0	0	0	0	1	1	no
Glyma01g17503	Glyma01g17503	Glyma01g17503	Gm01:21677719-21680521	ws82-0	ws82-14	NOTEST	0	0	0	0	1	1	no
Glyma01g17580	Glyma01g17580	Glyma01g17580	Gm01:21886080-21888825	ws82-0	ws82-14	NOTEST	0	0	0	0	1	1	no
Glyma01g17590	Glyma01g17590	Glyma01g17590	Gm01:21937384-21937864	ws82-0	ws82-14	OK	0	0.754287	1.79769e+308	1.79769e+308	0.025956	0.218161	no
Glyma01g17820	Glyma01g17820	Glyma01g17820	Gm01:22078170-22079110	ws82-0	ws82-14	OK	56.3724	52.6565	-0.0983763	0.220718	0.825312	0.9798	no
Glyma01g17850	Glyma01g17850	Glyma01g17850	Gm01:22130113-22137111	ws82-0	ws82-14	OK	36.1858	43.4021	0.262341	-0.53591	0.592021	0.928319	no
Glyma01g17870	Glyma01g17870	Glyma01g17870	Gm01:22202473-22210341	ws82-0	ws82-14	OK	20.1438	14.582	-0.466143	0.949681	0.342275	0.809742	no
Glyma01g17880	Glyma01g17880	Glyma01g17880	Gm01:22222121-22222938	ws82-0	ws82-14	NOTEST	0	0	0	0	1	1	no
Glyma01g18040	Glyma01g18040	Glyma01g18040	Gm01:22484144-22487576	ws82-0	ws82-14	OK	12.6304	10.111	-0.320977	0.715746	0.474148	0.885554	no
Glyma01g18200	Glyma01g18200	Glyma01g18200	Gm01:22687069-22688346	ws82-0	ws82-14	NOTEST	0	0	0	0	1	1	no
Glyma01g18360	Glyma01g18360	Glyma01g18360	Gm01:22689358-22689601	ws82-0	ws82-14	OK	1.07724	2.10789	0.968455	-0.549395	0.582734	0.92496	no
Glyma01g18520	Glyma01g18520	Glyma01g18520	Gm01:22790155-22793135	ws82-0	ws82-14	NOTEST	0	0	0	0	1	1	no
Glyma01g18606	Glyma01g18606	Glyma01g18606	Gm01:23174174-23175344	ws82-0	ws82-14	NOTEST	0.346687	0.191361	-0.857338	0.920797	0.357157	1	no
Glyma01g18693	Glyma01g18693	Glyma01g18693	Gm01:23245420-23247113	ws82-0	ws82-14	NOTEST	0	0	0	0	1	1	no
Glyma01g18780	Glyma01g18780	Glyma01g18780	Gm01:23303293-23306986	ws82-0	ws82-14	OK	13.2533	16.0509	0.276296	-0.620649	0.534831	0.907545	no
Glyma01g18885	Glyma01g18885	Glyma01g18885	Gm01:23422050-23424265	ws82-0	ws82-14	NOTEST	0	0.0494598	1.79769e+308	1.79769e+308	0.162559	1	no
Glyma01g18990	Glyma01g18990	Glyma01g18990	Gm01:23424891-23425203	ws82-0	ws82-14	NOTEST	0	0	0	0	1	1	no
Glyma01g19200	Glyma01g19200	Glyma01g19200	Gm01:23586981-23590259	ws82-0	ws82-14	OK	3.10698	3.80345	0.291796	-0.478144	0.632548	0.941134	no
Glyma01g19420	Glyma01g19420	Glyma01g19420	Gm01:23910735-23912214	ws82-0	ws82-14	OK	27.7929	22.3286	-0.315828	0.706785	0.4797	0.887545	no
Glyma01g19820	Glyma01g19820	Glyma01g19820	Gm01:24220923-24227067	ws82-0	ws82-14	OK	2.54166	2.01038	-0.338302	0.6181	0.53651	0.907944	no
Glyma01g20030	Glyma01g20030	Glyma01g20030	Gm01:24388541-24405141	ws82-0	ws82-14	OK	7.01508	8.70726	0.31176	-0.508936	0.610797	0.934258	no
Glyma01g20130	Glyma01g20130	Glyma01g20130	Gm01:24561667-24562473	ws82-0	ws82-14	NOTEST	0	0	0	0	1	1	no
Glyma01g20230	Glyma01g20230	Glyma01g20230	Gm01:24590327-24594299	ws82-0	ws82-14	OK	0.684438	2.89503	2.08059	-2.85269	0.00433508	0.0673193	no
Glyma01g20306	Glyma01g20306	Glyma01g20306	Gm01:24680832-24681420	ws82-0	ws82-14	NOTEST	0	0	0	0	1	1	no
Glyma01g20383	Glyma01g20383	Glyma01g20383	Gm01:24850234-24853077	ws82-0	ws82-14	OK	4.87187	2.83319	-0.782045	1.54852	0.121496	0.527356	no
Glyma01g20460	Glyma01g20460	Glyma01g20460	Gm01:24945683-24950931	ws82-0	ws82-14	OK	9.73208	14.6862	0.593645	-1.32574	0.184925	0.638462	no
Glyma01g20565	Glyma01g20565	Glyma01g20565	Gm01:25139086-25141476	ws82-0	ws82-14	NOTEST	0	0	0	0	1	1	no
Glyma01g20670	Glyma01g20670	Glyma01g20670	Gm01:25147643-25157143	ws82-0	ws82-14	OK	34.7406	29.7063	-0.225855	0.497741	0.618666	0.936042	no
Glyma01g20700	Glyma01g20700	Glyma01g20700	Gm01:25222324-25227920	ws82-0	ws82-14	OK	70.3898	52.4637	-0.424046	0.870322	0.384124	0.837382	no
Glyma01g20710	Glyma01g20710	Glyma01g20710	Gm01:25241778-25246814	ws82-0	ws82-14	OK	1.15656	0.290914	-1.99117	2.76854	0.00563084	0.0804634	no
Glyma01g20720	Glyma01g20720	Glyma01g20720	Gm01:25343080-25358309	ws82-0	ws82-14	OK	0.824624	2.0922	1.34321	-2.28016	0.0225984	0.200668	no
Glyma01g20740	Glyma01g20740	Glyma01g20740	Gm01:25402501-25405946	ws82-0	ws82-14	OK	0.53826	5.11385	3.24803	-4.94377	7.6626e-07	7.60896e-05	yes
Glyma01g20751	Glyma01g20751	Glyma01g20751	Gm01:25409531-25409921	ws82-0	ws82-14	NOTEST	0	0	0	0	1	1	no
Glyma01g20760	Glyma01g20760	Glyma01g20760	Gm01:25500530-25509163	ws82-0	ws82-14	OK	22.1244	16.5788	-0.416302	0.871581	0.383437	0.837059	no
Glyma01g20775	Glyma01g20775	Glyma01g20775	Gm01:25559739-25563228	ws82-0	ws82-14	OK	15.814	17.3302	0.132094	-0.294314	0.768518	0.971839	no
Glyma01g20790	Glyma01g20790	Glyma01g20790	Gm01:25566713-25569152	ws82-0	ws82-14	OK	0.923487	2.3355	1.33857	-1.76246	0.0779921	0.417213	no
Glyma01g20800	Glyma01g20800	Glyma01g20800	Gm01:25569808-25571509	ws82-0	ws82-14	OK	0.0850056	0.614312	2.85334	-1.8293	0.0673551	0.386724	no
Glyma01g20811	Glyma01g20811	Glyma01g20811	Gm01:25640214-25651295	ws82-0	ws82-14	OK	10.0502	5.6307	-0.835836	1.8537	0.0637815	0.374894	no
Glyma01g20820	Glyma01g20820	Glyma01g20820	Gm01:25640214-25651295	ws82-0	ws82-14	LOWDATA	0	0	-0.835836	0	1	1	no
Glyma01g20860	Glyma01g20860	Glyma01g20860	Gm01:25711548-25714121	ws82-0	ws82-14	OK	18.9102	45.77	1.27523	-2.78058	0.00542613	0.0783471	no
Glyma01g20870	Glyma01g20870	Glyma01g20870	Gm01:25714752-25716813	ws82-0	ws82-14	NOTEST	0.280022	0.305001	0.123272	-0.132263	0.894777	1	no
Glyma01g20885	Glyma01g20885	Glyma01g20885	Gm01:25783765-25787946	ws82-0	ws82-14	NOTEST	0	0	0	0	1	1	no
Glyma01g20900	Glyma01g20900	Glyma01g20900	Gm01:25807514-25813526	ws82-0	ws82-14	NOTEST	0	0.0601539	1.79769e+308	1.79769e+308	0.219662	1	no
Glyma01g20910	Glyma01g20910	Glyma01g20910	Gm01:25867401-25867807	ws82-0	ws82-14	NOTEST	0	0	0	0	1	1	no
Glyma01g20920	Glyma01g20920	Glyma01g20920	Gm01:25867821-25870459	ws82-0	ws82-14	OK	4.95142	4.38934	-0.173838	0.281814	0.778086	0.972731	no
Glyma01g20935	Glyma01g20935	Glyma01g20935	Gm01:25874290-25875066	ws82-0	ws82-14	NOTEST	0	0.147962	1.79769e+308	1.79769e+308	0.162559	1	no
Glyma01g20950	Glyma01g20950	Glyma01g20950	Gm01:26043470-26048530	ws82-0	ws82-14	OK	1.88355	0.578688	-1.7026	2.72458	0.00643839	0.0887321	no
Glyma01g20970	Glyma01g20970	Glyma01g20970	Gm01:26111521-26112660	ws82-0	ws82-14	NOTEST	0.0549516	0	-1.79769e+308	-1.79769e+308	0.155783	1	no
Glyma01g20980	Glyma01g20980	Glyma01g20980	Gm01:26203747-26206343	ws82-0	ws82-14	NOTEST	0	0	0	0	1	1	no
Glyma01g20986	Glyma01g20986	Glyma01g20986	Gm01:26214735-26217244	ws82-0	ws82-14	NOTEST	0	0	0	0	1	1	no
Glyma01g20993	Glyma01g20993	Glyma01g20993	Gm01:26218166-26218983	ws82-0	ws82-14	NOTEST	0	0	0	0	1	1	no
Glyma01g21000	Glyma01g21000	Glyma01g21000	Gm01:26227617-26228265	ws82-0	ws82-14	NOTEST	0	0	0	0	1	1	no
Glyma01g21120	Glyma01g21120	Glyma01g21120	Gm01:26230555-26237293	ws82-0	ws82-14	NOTEST	0	0	0	0	1	1	no
Glyma01g21241	Glyma01g21241	Glyma01g21241	Gm01:26358875-26362351	ws82-0	ws82-14	NOTEST	0	0.0856841	1.79769e+308	1.79769e+308	0.162559	1	no
Glyma01g21360	Glyma01g21360	Glyma01g21360	Gm01:26380864-26392487	ws82-0	ws82-14	OK	3.69602	4.3338	0.229659	-0.450011	0.652703	0.946814	no
Glyma01g21480	Glyma01g21480	Glyma01g21480	Gm01:26542098-26544485	ws82-0	ws82-14	OK	3.59101	2.5507	-0.493495	1.01791	0.308719	0.782212	no
Glyma01g21500	Glyma01g21500	Glyma01g21500	Gm01:26596018-26599902	ws82-0	ws82-14	OK	49.0595	31.0112	-0.661744	1.48065	0.138699	0.563479	no
Glyma01g21510	Glyma01g21510	Glyma01g21510	Gm01:26672645-26677024	ws82-0	ws82-14	OK	1.16448	3.66281	1.65327	-2.05445	0.0399317	0.282301	no
Glyma01g21521	Glyma01g21521	Glyma01g21521	Gm01:26725662-26726466	ws82-0	ws82-14	NOTEST	0	0	0	0	1	1	no
Glyma01g21530	Glyma01g21530	Glyma01g21530	Gm01:26737266-26739888	ws82-0	ws82-14	NOTEST	0.0719028	0.066288	-0.117299	0.0471473	0.962396	1	no
Glyma01g21540	Glyma01g21540	Glyma01g21540	Gm01:26740703-26749646	ws82-0	ws82-14	NOTEST	0.258984	0.115183	-1.16893	0.656965	0.511204	1	no
Glyma01g21570	Glyma01g21570	Glyma01g21570	Gm01:26771286-26773122	ws82-0	ws82-14	NOTEST	0.0308442	0	-1.79769e+308	-1.79769e+308	0.237134	1	no
Glyma01g21575	Glyma01g21575	Glyma01g21575	Gm01:26798193-26799005	ws82-0	ws82-14	NOTEST	0	0	0	0	1	1	no
Glyma01g21580	Glyma01g21580	Glyma01g21580	Gm01:26814403-26817180	ws82-0	ws82-14	NOTEST	0	0	0	0	1	1	no
Glyma01g21590	Glyma01g21590	Glyma01g21590	Gm01:26883578-26885952	ws82-0	ws82-14	NOTEST	0	0	0	0	1	1	no
Glyma01g21620	Glyma01g21620	Glyma01g21620	Gm01:26918441-26921225	ws82-0	ws82-14	NOTEST	0.0369224	0.0992301	1.42628	-0.860225	0.389665	1	no
Glyma01g21630	Glyma01g21630	Glyma01g21630	Gm01:26936772-26938129	ws82-0	ws82-14	NOTEST	0	0	0	0	1	1	no
Glyma01g21660	Glyma01g21660	Glyma01g21660	Gm01:27033743-27042354	ws82-0	ws82-14	OK	0.321336	0.82694	1.3637	-1.77285	0.0762538	0.41285	no
Glyma01g21680	Glyma01g21680	Glyma01g21680	Gm01:27082459-27084583	ws82-0	ws82-14	OK	6.09576	3.78828	-0.686261	1.3517	0.176473	0.625079	no
Glyma01g21707	Glyma01g21707	Glyma01g21707	Gm01:27099239-27134127	ws82-0	ws82-14	OK	4.03567	2.82162	-0.516281	0.951603	0.341299	0.809179	no
Glyma01g21734	Glyma01g21734	Glyma01g21734	Gm01:27099239-27134127	ws82-0	ws82-14	OK	0.482056	0.614182	0.349465	-0.313479	0.753917	0.969636	no
Glyma01g21762	Glyma01g21762	Glyma01g21762	Gm01:27142763-27149757	ws82-0	ws82-14	NOTEST	0	0	0	0	1	1	no
Glyma01g21790	Glyma01g21790	Glyma01g21790	Gm01:27193609-27195324	ws82-0	ws82-14	NOTEST	0	0	0	0	1	1	no
Glyma01g21831	Glyma01g21831	Glyma01g21831	Gm01:27209475-27244035	ws82-0	ws82-14	OK	1.29057	0.387975	-1.73397	1.9123	0.0558378	0.345072	no
Glyma01g21870	Glyma01g21870	Glyma01g21870	Gm01:27283470-27283944	ws82-0	ws82-14	NOTEST	0	0	0	0	1	1	no
Glyma01g21900	Glyma01g21900	Glyma01g21900	Gm01:27377288-27379936	ws82-0	ws82-14	OK	4.45342	3.11173	-0.517199	1.02237	0.306608	0.780136	no
Glyma01g22120	Glyma01g22120	Glyma01g22120	Gm01:27653934-27655968	ws82-0	ws82-14	NOTEST	0	0	0	0	1	1	no
Glyma01g22131	Glyma01g22131	Glyma01g22131	Gm01:27671430-27681519	ws82-0	ws82-14	NOTEST	0	0	0	0	1	1	no
Glyma01g22140	Glyma01g22140	Glyma01g22140	Gm01:27681952-27683220	ws82-0	ws82-14	NOTEST	0	0	0	0	1	1	no
Glyma01g22160	Glyma01g22160	Glyma01g22160	Gm01:27743827-27745117	ws82-0	ws82-14	OK	1.14422	1.53154	0.420617	-0.592419	0.55357	0.915902	no
Glyma01g22170	Glyma01g22170	Glyma01g22170	Gm01:27746481-27751766	ws82-0	ws82-14	OK	7.07733	5.31037	-0.414392	0.853734	0.393252	0.843794	no
Glyma01g22180	Glyma01g22180	Glyma01g22180	Gm01:27781683-27784987	ws82-0	ws82-14	OK	3.57444	3.05762	-0.225307	0.361269	0.717898	0.964414	no
Glyma01g22195	Glyma01g22195	Glyma01g22195	Gm01:27825362-27840530	ws82-0	ws82-14	NOTEST	0.172246	0.109639	-0.651711	0.359165	0.719472	1	no
Glyma01g22210	Glyma01g22210	Glyma01g22210	Gm01:27825362-27840530	ws82-0	ws82-14	OK	2.64354	1.53283	-0.786268	1.0814	0.279521	0.753876	no
Glyma01g22260	Glyma01g22260	Glyma01g22260	Gm01:27963645-27965402	ws82-0	ws82-14	OK	5.13221	12.0874	1.23585	-2.73301	0.00627585	0.0870052	no
Glyma01g22333	Glyma01g22333	Glyma01g22333	Gm01:28079064-28083033	ws82-0	ws82-14	NOTEST	0	0.0958379	1.79769e+308	1.79769e+308	0.162559	1	no
Glyma01g22406	Glyma01g22406	Glyma01g22406	Gm01:28104831-28117466	ws82-0	ws82-14	OK	7.42319	5.15739	-0.525398	1.17626	0.239491	0.712678	no
Glyma01g22480	Glyma01g22480	Glyma01g22480	Gm01:28151173-28153211	ws82-0	ws82-14	OK	5.8505	4.48533	-0.383346	0.828643	0.407306	0.851964	no
Glyma01g22490	Glyma01g22490	Glyma01g22490	Gm01:28188535-28194784	ws82-0	ws82-14	OK	24.1093	19.1833	-0.329738	0.727277	0.467056	0.881871	no
Glyma01g22501	Glyma01g22501	Glyma01g22501	Gm01:28205872-28206502	ws82-0	ws82-14	OK	0	1.48299	1.79769e+308	1.79769e+308	0.162559	0.601803	no
Glyma01g22510	Glyma01g22510	Glyma01g22510	Gm01:28236453-28241841	ws82-0	ws82-14	OK	4.16807	2.35908	-0.821156	1.57226	0.115889	0.515129	no
Glyma01g22530	Glyma01g22530	Glyma01g22530	Gm01:28336960-28340913	ws82-0	ws82-14	NOTEST	0.0852935	0.239651	1.49043	-1.13951	0.254492	1	no
Glyma01g22542	Glyma01g22542	Glyma01g22542	Gm01:28390587-28392968	ws82-0	ws82-14	OK	3.46863	2.44348	-0.505433	0.715744	0.474149	0.885554	no
Glyma01g22554	Glyma01g22554	Glyma01g22554	Gm01:28393068-28396339	ws82-0	ws82-14	OK	1.8625	1.41052	-0.401006	0.644015	0.519565	0.900938	no
Glyma01g22567	Glyma01g22567	Glyma01g22567	Gm01:28416197-28418758	ws82-0	ws82-14	NOTEST	0	0	0	0	1	1	no
Glyma01g22580	Glyma01g22580	Glyma01g22580	Gm01:28513351-28526497	ws82-0	ws82-14	OK	3.75931	3.73271	-0.0102454	0.0188379	0.98497	0.998884	no
Glyma01g22600	Glyma01g22600	Glyma01g22600	Gm01:28536103-28539838	ws82-0	ws82-14	OK	20.1632	20.8856	0.0507826	-0.107516	0.914379	0.993064	no
Glyma01g22610	Glyma01g22610	Glyma01g22610	Gm01:28541141-28542499	ws82-0	ws82-14	NOTEST	0.0646165	0.116893	0.855217	-0.485156	0.627565	1	no
Glyma01g22620	Glyma01g22620	Glyma01g22620	Gm01:28543689-28553173	ws82-0	ws82-14	OK	91.9459	73.1977	-0.328988	0.609729	0.542041	0.910744	no
Glyma01g22630	Glyma01g22630	Glyma01g22630	Gm01:28591482-28597660	ws82-0	ws82-14	OK	3.51358	2.63708	-0.413996	0.812995	0.416221	0.857091	no
Glyma01g22641	Glyma01g22641	Glyma01g22641	Gm01:28636476-28637827	ws82-0	ws82-14	OK	2.81838	2.39788	-0.233105	0.382128	0.702366	0.959391	no
Glyma01g22650	Glyma01g22650	Glyma01g22650	Gm01:28639438-28642822	ws82-0	ws82-14	NOTEST	0	0	0	0	1	1	no
Glyma01g22670	Glyma01g22670	Glyma01g22670	Gm01:28699702-28704423	ws82-0	ws82-14	NOTEST	0	0	0	0	1	1	no
Glyma01g22680	Glyma01g22680	Glyma01g22680	Gm01:28708173-28714632	ws82-0	ws82-14	OK	21.0486	18.9294	-0.153097	0.323147	0.746584	0.968817	no
Glyma01g22710	Glyma01g22710	Glyma01g22710	Gm01:28768432-28773021	ws82-0	ws82-14	OK	1.59104	1.03377	-0.622054	1.16493	0.244046	0.717298	no
Glyma01g22720	Glyma01g22720	Glyma01g22720	Gm01:28773705-28774862	ws82-0	ws82-14	NOTEST	0.293731	0.185653	-0.661889	0.500009	0.617069	1	no
Glyma01g22730	Glyma01g22730	Glyma01g22730	Gm01:28777549-28780388	ws82-0	ws82-14	NOTEST	0	0	0	0	1	1	no
Glyma01g22751	Glyma01g22751	Glyma01g22751	Gm01:28847126-28848359	ws82-0	ws82-14	NOTEST	0.0614644	0.215658	1.81092	-1.1267	0.25987	1	no
Glyma01g22770	Glyma01g22770	Glyma01g22770	Gm01:28902721-28902950	ws82-0	ws82-14	NOTEST	0	0	0	0	1	1	no
Glyma01g22800	Glyma01g22800	Glyma01g22800	Gm01:28928281-28929701	ws82-0	ws82-14	OK	0.829884	0.903989	0.123395	-0.178586	0.858263	0.984556	no
Glyma01g22830	Glyma01g22830	Glyma01g22830	Gm01:28986402-28988037	ws82-0	ws82-14	OK	0.538881	0.710242	0.398344	-0.462932	0.643413	0.944607	no
Glyma01g22840	Glyma01g22840	Glyma01g22840	Gm01:28991061-29005174	ws82-0	ws82-14	NOTEST	0.00761796	0.0365159	2.26105	-0.591312	0.554311	1	no
Glyma01g22850	Glyma01g22850	Glyma01g22850	Gm01:29076299-29082231	ws82-0	ws82-14	NOTEST	0	0	0	0	1	1	no
Glyma01g22861	Glyma01g22861	Glyma01g22861	Gm01:29092183-29093676	ws82-0	ws82-14	NOTEST	0	0	0	0	1	1	no
Glyma01g22871	Glyma01g22871	Glyma01g22871	Gm01:29147726-29148607	ws82-0	ws82-14	OK	2.94635	9.04077	1.61752	-2.44618	0.0144379	0.150622	no
Glyma01g22880	Glyma01g22880	Glyma01g22880	Gm01:29149880-29152191	ws82-0	ws82-14	OK	0.158177	0.956462	2.59617	-3.07027	0.00213862	0.0414099	yes
Glyma01g22910	Glyma01g22910	Glyma01g22910	Gm01:29193663-29195557	ws82-0	ws82-14	NOTEST	0	0	0	0	1	1	no
Glyma01g22927	Glyma01g22927	Glyma01g22927	Gm01:29230774-29239997	ws82-0	ws82-14	NOTEST	0	0	0	0	1	1	no
Glyma01g22944	Glyma01g22944	Glyma01g22944	Gm01:29270621-29273823	ws82-0	ws82-14	NOTEST	0	0	0	0	1	1	no
Glyma01g22962	Glyma01g22962	Glyma01g22962	Gm01:29296975-29300243	ws82-0	ws82-14	NOTEST	0.00845472	0	-1.79769e+308	-1.79769e+308	0.279528	1	no
Glyma01g22980	Glyma01g22980	Glyma01g22980	Gm01:29388012-29389406	ws82-0	ws82-14	NOTEST	0	0	0	0	1	1	no
Glyma01g22990	Glyma01g22990	Glyma01g22990	Gm01:29393119-29399932	ws82-0	ws82-14	OK	0.22797	0.511322	1.16539	-1.57086	0.116216	0.516194	no
Glyma01g23015	Glyma01g23015	Glyma01g23015	Gm01:29421939-29425642	ws82-0	ws82-14	OK	1.69571	1.65366	-0.0362306	0.0306857	0.97552	0.997972	no
Glyma01g23040	Glyma01g23040	Glyma01g23040	Gm01:29470009-29471440	ws82-0	ws82-14	OK	5.25508	30.1869	2.52214	-5.37236	7.77135e-08	1.10502e-05	yes
Glyma01g23056	Glyma01g23056	Glyma01g23056	Gm01:29471833-29483149	ws82-0	ws82-14	OK	3.08982	3.35569	0.119086	-0.259855	0.794976	0.975309	no
Glyma01g23072	Glyma01g23072	Glyma01g23072	Gm01:29511789-29512084	ws82-0	ws82-14	NOTEST	0	0	0	0	1	1	no
Glyma01g23089	Glyma01g23089	Glyma01g23089	Gm01:29533330-29533964	ws82-0	ws82-14	NOTEST	0	0	0	0	1	1	no
Glyma01g23106	Glyma01g23106	Glyma01g23106	Gm01:29535512-29536834	ws82-0	ws82-14	NOTEST	0.0793428	0	-1.79769e+308	-1.79769e+308	0.237134	1	no
Glyma01g23123	Glyma01g23123	Glyma01g23123	Gm01:29537254-29537802	ws82-0	ws82-14	NOTEST	0	0	0	0	1	1	no
Glyma01g23140	Glyma01g23140	Glyma01g23140	Gm01:29565892-29574413	ws82-0	ws82-14	OK	0.486152	0.749973	0.625431	-1.02376	0.305948	0.779924	no
Glyma01g23150	Glyma01g23150	Glyma01g23150	Gm01:29660957-29665158	ws82-0	ws82-14	OK	4.99099	3.75889	-0.409017	0.873219	0.382544	0.836615	no
Glyma01g23180	Glyma01g23180	Glyma01g23180	Gm01:29699064-29704324	ws82-0	ws82-14	OK	4.12827	2.09914	-0.975736	2.03835	0.0415152	0.289297	no
Glyma01g23196	Glyma01g23196	Glyma01g23196	Gm01:29809758-29827788	ws82-0	ws82-14	OK	2.69537	1.98399	-0.442082	0.742535	0.457763	0.878382	no
Glyma01g23213	Glyma01g23213	Glyma01g23213	Gm01:29809758-29827788	ws82-0	ws82-14	NOTEST	0.211329	0.0764182	-1.4675	0.830622	0.406187	1	no
Glyma01g23230	Glyma01g23230	Glyma01g23230	Gm01:29843906-29847664	ws82-0	ws82-14	OK	6.10256	7.30204	0.258885	-0.568617	0.569616	0.92072	no
Glyma01g23250	Glyma01g23250	Glyma01g23250	Gm01:29855703-29857266	ws82-0	ws82-14	NOTEST	0	0	0	0	1	1	no
Glyma01g23300	Glyma01g23300	Glyma01g23300	Gm01:29947728-29948872	ws82-0	ws82-14	NOTEST	0	0	0	0	1	1	no
Glyma01g23342	Glyma01g23342	Glyma01g23342	Gm01:29989093-29991297	ws82-0	ws82-14	NOTEST	0	0	0	0	1	1	no
Glyma01g23384	Glyma01g23384	Glyma01g23384	Gm01:30079377-30079787	ws82-0	ws82-14	OK	0.844783	0.384942	-1.13394	0.637298	0.523931	0.902726	no
Glyma01g23427	Glyma01g23427	Glyma01g23427	Gm01:30083471-30150322	ws82-0	ws82-14	OK	1.97974	1.80461	-0.13362	0.264035	0.791753	0.974423	no
Glyma01g23470	Glyma01g23470	Glyma01g23470	Gm01:30208373-30208835	ws82-0	ws82-14	NOTEST	0	0	0	0	1	1	no
Glyma01g23534	Glyma01g23534	Glyma01g23534	Gm01:30275109-30281645	ws82-0	ws82-14	NOTEST	0	0	0	0	1	1	no
Glyma01g23598	Glyma01g23598	Glyma01g23598	Gm01:30314496-30324821	ws82-0	ws82-14	OK	8.06641	6.22111	-0.374754	0.830789	0.406093	0.851119	no
Glyma01g23662	Glyma01g23662	Glyma01g23662	Gm01:30575165-30577235	ws82-0	ws82-14	NOTEST	0	0	0	0	1	1	no
Glyma01g23726	Glyma01g23726	Glyma01g23726	Gm01:30704826-30710568	ws82-0	ws82-14	OK	7.04713	6.42004	-0.134455	0.293814	0.7689	0.971868	no
Glyma01g23790	Glyma01g23790	Glyma01g23790	Gm01:30725259-30734274	ws82-0	ws82-14	NOTEST	0	0	0	0	1	1	no
Glyma01g23820	Glyma01g23820	Glyma01g23820	Gm01:30803138-30810796	ws82-0	ws82-14	OK	1.59775	2.15523	0.431802	-0.612621	0.540127	0.909664	no
Glyma01g23830	Glyma01g23830	Glyma01g23830	Gm01:30834278-30837915	ws82-0	ws82-14	OK	4.51522	6.36593	0.495576	-1.01826	0.308554	0.782212	no
Glyma01g23840	Glyma01g23840	Glyma01g23840	Gm01:30921784-30923363	ws82-0	ws82-14	NOTEST	0	0	0	0	1	1	no
Glyma01g23870	Glyma01g23870	Glyma01g23870	Gm01:31003666-31006666	ws82-0	ws82-14	OK	1.00394	14.2917	3.83143	-7.49347	6.70575e-14	4.66606e-11	yes
Glyma01g24100	Glyma01g24100	Glyma01g24100	Gm01:31272679-31276347	ws82-0	ws82-14	OK	38.2847	43.4142	0.181399	-0.406291	0.684529	0.954645	no
Glyma01g24115	Glyma01g24115	Glyma01g24115	Gm01:31363012-31365202	ws82-0	ws82-14	NOTEST	0	0	0	0	1	1	no
Glyma01g24130	Glyma01g24130	Glyma01g24130	Gm01:31382751-31384508	ws82-0	ws82-14	NOTEST	0	0	0	0	1	1	no
Glyma01g24136	Glyma01g24136	Glyma01g24136	Gm01:31384592-31388267	ws82-0	ws82-14	NOTEST	0	0	0	0	1	1	no
Glyma01g24143	Glyma01g24143	Glyma01g24143	Gm01:31403714-31405886	ws82-0	ws82-14	NOTEST	0	0	0	0	1	1	no
Glyma01g24150	Glyma01g24150	Glyma01g24150	Gm01:31406290-31410211	ws82-0	ws82-14	OK	1.33419	2.37018	0.82903	-1.30416	0.192178	0.649678	no
Glyma01g24160	Glyma01g24160	Glyma01g24160	Gm01:31442860-31443621	ws82-0	ws82-14	NOTEST	0	0.204567	1.79769e+308	1.79769e+308	0.082025	1	no
Glyma01g24360	Glyma01g24360	Glyma01g24360	Gm01:31583729-31587255	ws82-0	ws82-14	OK	27.8473	17.8009	-0.645591	1.45001	0.147056	0.579786	no
Glyma01g24383	Glyma01g24383	Glyma01g24383	Gm01:31655035-31655556	ws82-0	ws82-14	NOTEST	0	0	0	0	1	1	no
Glyma01g24406	Glyma01g24406	Glyma01g24406	Gm01:31704492-31706592	ws82-0	ws82-14	NOTEST	0.176092	0	-1.79769e+308	-1.79769e+308	0.155783	1	no
Glyma01g24430	Glyma01g24430	Glyma01g24430	Gm01:31720084-31726752	ws82-0	ws82-14	OK	3.71841	2.41837	-0.620647	1.13424	0.256695	0.73229	no
Glyma01g24455	Glyma01g24455	Glyma01g24455	Gm01:31734753-31736467	ws82-0	ws82-14	NOTEST	0.0828595	0.0774722	-0.0969886	0.0670711	0.946525	1	no
Glyma01g24480	Glyma01g24480	Glyma01g24480	Gm01:31792540-31792932	ws82-0	ws82-14	OK	2.38834	3.05818	0.356663	-0.442249	0.658309	0.947401	no
Glyma01g24495	Glyma01g24495	Glyma01g24495	Gm01:31795450-31795885	ws82-0	ws82-14	OK	0.631467	0.601193	-0.070878	0.0490147	0.960908	0.997377	no
Glyma01g24510	Glyma01g24510	Glyma01g24510	Gm01:31818673-31828608	ws82-0	ws82-14	OK	2.35196	2.80017	0.251652	-0.50758	0.611748	0.934265	no
Glyma01g24515	Glyma01g24515	Glyma01g24515	Gm01:31889614-31891603	ws82-0	ws82-14	NOTEST	0	0	0	0	1	1	no
Glyma01g24520	Glyma01g24520	Glyma01g24520	Gm01:31911765-31920749	ws82-0	ws82-14	OK	3.8942	2.58608	-0.59056	0.918835	0.358182	0.82218	no
Glyma01g24530	Glyma01g24530	Glyma01g24530	Gm01:31964428-31977723	ws82-0	ws82-14	OK	0.585469	0.17855	-1.71327	2.08294	0.0372564	0.272021	no
Glyma01g24536	Glyma01g24536	Glyma01g24536	Gm01:31981604-31985794	ws82-0	ws82-14	NOTEST	0	0	0	0	1	1	no
Glyma01g24543	Glyma01g24543	Glyma01g24543	Gm01:32028704-32031074	ws82-0	ws82-14	NOTEST	0	0	0	0	1	1	no
Glyma01g24550	Glyma01g24550	Glyma01g24550	Gm01:32033425-32036205	ws82-0	ws82-14	OK	2.89503	5.10566	0.818522	-1.16895	0.242425	0.715288	no
Glyma01g24570	Glyma01g24570	Glyma01g24570	Gm01:32066869-32072424	ws82-0	ws82-14	OK	7.01811	7.26286	0.0494549	-0.0978628	0.922041	0.993479	no
Glyma01g24580	Glyma01g24580	Glyma01g24580	Gm01:32077414-32078744	ws82-0	ws82-14	NOTEST	0	0	0	0	1	1	no
Glyma01g24601	Glyma01g24601	Glyma01g24601	Gm01:32084232-32086938	ws82-0	ws82-14	OK	6.13023	7.29948	0.251853	-0.369023	0.712111	0.962192	no
Glyma01g24620	Glyma01g24620	Glyma01g24620	Gm01:32161499-32162094	ws82-0	ws82-14	NOTEST	0	0	0	0	1	1	no
Glyma01g24650	Glyma01g24650	Glyma01g24650	Gm01:32202535-32211787	ws82-0	ws82-14	OK	2.36274	5.63945	1.25509	-2.37095	0.0177423	0.172128	no
Glyma01g24670	Glyma01g24670	Glyma01g24670	Gm01:32220914-32223882	ws82-0	ws82-14	OK	0.507702	0.40727	-0.317997	0.451054	0.65195	0.946557	no
Glyma01g24680	Glyma01g24680	Glyma01g24680	Gm01:32231085-32231557	ws82-0	ws82-14	NOTEST	0	0	0	0	1	1	no
Glyma01g24710	Glyma01g24710	Glyma01g24710	Gm01:32287633-32289710	ws82-0	ws82-14	NOTEST	0.041896	0.250945	2.58249	-2.21973	0.0264371	1	no
Glyma01g24715	Glyma01g24715	Glyma01g24715	Gm01:32301822-32302361	ws82-0	ws82-14	NOTEST	0	0	0	0	1	1	no
Glyma01g24720	Glyma01g24720	Glyma01g24720	Gm01:32308210-32311363	ws82-0	ws82-14	NOTEST	0	0	0	0	1	1	no
Glyma01g24735	Glyma01g24735	Glyma01g24735	Gm01:32401120-32402034	ws82-0	ws82-14	NOTEST	0	0	0	0	1	1	no
Glyma01g24750	Glyma01g24750	Glyma01g24750	Gm01:32402350-32403396	ws82-0	ws82-14	NOTEST	0	0	0	0	1	1	no
Glyma01g24771	Glyma01g24771	Glyma01g24771	Gm01:32417415-32418160	ws82-0	ws82-14	NOTEST	0	0	0	0	1	1	no
Glyma01g24790	Glyma01g24790	Glyma01g24790	Gm01:32422309-32422465	ws82-0	ws82-14	NOTEST	0	0	0	0	1	1	no
Glyma01g24801	Glyma01g24801	Glyma01g24801	Gm01:32490914-32491358	ws82-0	ws82-14	NOTEST	0	0	0	0	1	1	no
Glyma01g24811	Glyma01g24811	Glyma01g24811	Gm01:32561178-32561613	ws82-0	ws82-14	NOTEST	0	0	0	0	1	1	no
Glyma01g24820	Glyma01g24820	Glyma01g24820	Gm01:32606517-32608233	ws82-0	ws82-14	NOTEST	0	0	0	0	1	1	no
Glyma01g24835	Glyma01g24835	Glyma01g24835	Gm01:32612017-32613710	ws82-0	ws82-14	NOTEST	0	0	0	0	1	1	no
Glyma01g24850	Glyma01g24850	Glyma01g24850	Gm01:32687318-32692418	ws82-0	ws82-14	NOTEST	0	0	0	0	1	1	no
Glyma01g24870	Glyma01g24870	Glyma01g24870	Gm01:32782513-32787123	ws82-0	ws82-14	NOTEST	0.0289369	0.102371	1.82283	-1.1341	0.256751	1	no
Glyma01g24880	Glyma01g24880	Glyma01g24880	Gm01:32798562-32800071	ws82-0	ws82-14	OK	13.8433	6.80185	-1.02519	2.16109	0.0306885	0.243365	no
Glyma01g24900	Glyma01g24900	Glyma01g24900	Gm01:32814004-32817943	ws82-0	ws82-14	OK	6.37239	6.92105	0.119157	-0.238372	0.811593	0.978544	no
Glyma01g24915	Glyma01g24915	Glyma01g24915	Gm01:32834808-32836555	ws82-0	ws82-14	NOTEST	0	0	0	0	1	1	no
Glyma01g24931	Glyma01g24931	Glyma01g24931	Gm01:32867175-32870537	ws82-0	ws82-14	OK	23.0961	44.5161	0.94668	-2.09729	0.0359679	0.266673	no
Glyma01g24945	Glyma01g24945	Glyma01g24945	Gm01:32870727-32871773	ws82-0	ws82-14	OK	14.2526	12.8169	-0.153178	0.320846	0.748327	0.969123	no
Glyma01g24960	Glyma01g24960	Glyma01g24960	Gm01:32900893-32902163	ws82-0	ws82-14	NOTEST	0	0	0	0	1	1	no
Glyma01g24975	Glyma01g24975	Glyma01g24975	Gm01:33011689-33012355	ws82-0	ws82-14	NOTEST	0	0	0	0	1	1	no
Glyma01g24990	Glyma01g24990	Glyma01g24990	Gm01:33023697-33026836	ws82-0	ws82-14	NOTEST	0	0	0	0	1	1	no
Glyma01g25000	Glyma01g25000	Glyma01g25000	Gm01:33038313-33043683	ws82-0	ws82-14	NOTEST	0.042853	0.114026	1.4119	-0.554151	0.579475	1	no
Glyma01g25010	Glyma01g25010	Glyma01g25010	Gm01:33122056-33128090	ws82-0	ws82-14	OK	1.45848	1.88136	0.367308	-0.581288	0.561046	0.918893	no
Glyma01g25040	Glyma01g25040	Glyma01g25040	Gm01:33159095-33163007	ws82-0	ws82-14	OK	4.80106	6.49674	0.436364	-0.929936	0.352404	0.817643	no
Glyma01g25116	Glyma01g25116	Glyma01g25116	Gm01:33175920-33176216	ws82-0	ws82-14	NOTEST	0	0	0	0	1	1	no
Glyma01g25193	Glyma01g25193	Glyma01g25193	Gm01:33176938-33177664	ws82-0	ws82-14	NOTEST	0	0	0	0	1	1	no
Glyma01g25270	Glyma01g25270	Glyma01g25270	Gm01:33300641-33305517	ws82-0	ws82-14	OK	16.466	5.61106	-1.55315	3.35542	0.000792459	0.0197535	yes
Glyma01g25690	Glyma01g25690	Glyma01g25690	Gm01:33714521-33724227	ws82-0	ws82-14	OK	1.71343	1.78003	0.0550163	-0.0981139	0.921842	0.993479	no
Glyma01g25710	Glyma01g25710	Glyma01g25710	Gm01:33743092-33750073	ws82-0	ws82-14	OK	1.16526	1.78965	0.619033	-1.10451	0.269371	0.744865	no
Glyma01g25734	Glyma01g25734	Glyma01g25734	Gm01:33873561-33877219	ws82-0	ws82-14	NOTEST	0	0	0	0	1	1	no
Glyma01g25758	Glyma01g25758	Glyma01g25758	Gm01:33877681-33878910	ws82-0	ws82-14	NOTEST	0	0	0	0	1	1	no
Glyma01g25782	Glyma01g25782	Glyma01g25782	Gm01:33892028-33896774	ws82-0	ws82-14	NOTEST	0.0175386	0.12116	2.78831	-1.11304	0.265692	1	no
Glyma01g25806	Glyma01g25806	Glyma01g25806	Gm01:33911123-33912252	ws82-0	ws82-14	NOTEST	0	0	0	0	1	1	no
Glyma01g25830	Glyma01g25830	Glyma01g25830	Gm01:33967102-33969353	ws82-0	ws82-14	OK	10.4755	19.1177	0.867892	-1.94076	0.0522878	0.331528	no
Glyma01g25861	Glyma01g25861	Glyma01g25861	Gm01:33970039-33970770	ws82-0	ws82-14	NOTEST	0	0	0	0	1	1	no
Glyma01g25890	Glyma01g25890	Glyma01g25890	Gm01:34032831-34039400	ws82-0	ws82-14	OK	15.0183	3.27761	-2.19601	4.60724	4.08051e-06	0.000295241	yes
Glyma01g25903	Glyma01g25903	Glyma01g25903	Gm01:34110636-34112307	ws82-0	ws82-14	NOTEST	0	0.265465	1.79769e+308	1.79769e+308	0.082025	1	no
Glyma01g25916	Glyma01g25916	Glyma01g25916	Gm01:34210140-34210872	ws82-0	ws82-14	NOTEST	0	0.0868767	1.79769e+308	1.79769e+308	0.162559	1	no
Glyma01g25930	Glyma01g25930	Glyma01g25930	Gm01:34244964-34245805	ws82-0	ws82-14	NOTEST	0.328405	0.389583	0.246454	-0.22237	0.824026	1	no
Glyma01g25940	Glyma01g25940	Glyma01g25940	Gm01:34287073-34295334	ws82-0	ws82-14	OK	23.1156	23.0148	-0.0063088	0.0129241	0.989688	0.9991	no
Glyma01g25960	Glyma01g25960	Glyma01g25960	Gm01:34329634-34332496	ws82-0	ws82-14	OK	0.544303	1.01762	0.902721	-0.981526	0.326334	0.797699	no
Glyma01g25980	Glyma01g25980	Glyma01g25980	Gm01:34344570-34345856	ws82-0	ws82-14	NOTEST	0	0	0	0	1	1	no
Glyma01g26010	Glyma01g26010	Glyma01g26010	Gm01:34353206-34357427	ws82-0	ws82-14	NOTEST	0.0224016	0.142675	2.67106	-1.70394	0.0883917	1	no
Glyma01g26220	Glyma01g26220	Glyma01g26220	Gm01:34484074-34486309	ws82-0	ws82-14	OK	2.80142	4.13043	0.560134	-1.02244	0.306571	0.780136	no
Glyma01g26230	Glyma01g26230	Glyma01g26230	Gm01:34508385-34510490	ws82-0	ws82-14	OK	1.33061	25.2091	4.24378	-7.25148	4.12337e-13	2.40805e-10	yes
Glyma01g26300	Glyma01g26300	Glyma01g26300	Gm01:34545482-34547230	ws82-0	ws82-14	OK	6.73758	7.12768	0.0812029	-0.159027	0.873647	0.986638	no
Glyma01g26310	Glyma01g26310	Glyma01g26310	Gm01:34591834-34592752	ws82-0	ws82-14	NOTEST	0	0	0	0	1	1	no
Glyma01g26325	Glyma01g26325	Glyma01g26325	Gm01:34678298-34679472	ws82-0	ws82-14	NOTEST	0	0	0	0	1	1	no
Glyma01g26340	Glyma01g26340	Glyma01g26340	Gm01:34729733-34732217	ws82-0	ws82-14	NOTEST	0.123477	0.0731171	-0.755964	0.690344	0.489978	1	no
Glyma01g26350	Glyma01g26350	Glyma01g26350	Gm01:34828578-34838846	ws82-0	ws82-14	OK	2.32709	3.4366	0.562455	-1.15512	0.24804	0.722079	no
Glyma01g26360	Glyma01g26360	Glyma01g26360	Gm01:34923320-34923989	ws82-0	ws82-14	OK	19.8169	28.8544	0.542059	-1.16244	0.245057	0.718453	no
Glyma01g26570	Glyma01g26570	Glyma01g26570	Gm01:35047812-35050350	ws82-0	ws82-14	NOTEST	0.0924698	0	-1.79769e+308	-1.79769e+308	0.0762003	1	no
Glyma01g26580	Glyma01g26580	Glyma01g26580	Gm01:35128362-35132942	ws82-0	ws82-14	NOTEST	0.0593295	0.0558445	-0.087335	0.0427059	0.965936	1	no
Glyma01g26590	Glyma01g26590	Glyma01g26590	Gm01:35185581-35190582	ws82-0	ws82-14	NOTEST	0.0680762	0.134568	0.983109	-1.07766	0.281185	1	no
Glyma01g26600	Glyma01g26600	Glyma01g26600	Gm01:35191726-35193878	ws82-0	ws82-14	OK	7.96192	4.49138	-0.825956	1.56907	0.116632	0.517128	no
Glyma01g26606	Glyma01g26606	Glyma01g26606	Gm01:35221753-35222332	ws82-0	ws82-14	NOTEST	0	0	0	0	1	1	no
Glyma01g26613	Glyma01g26613	Glyma01g26613	Gm01:35260947-35261763	ws82-0	ws82-14	NOTEST	0	0	0	0	1	1	no
Glyma01g26620	Glyma01g26620	Glyma01g26620	Gm01:35271480-35272153	ws82-0	ws82-14	NOTEST	0	0	0	0	1	1	no
Glyma01g26650	Glyma01g26650	Glyma01g26650	Gm01:35317654-35328670	ws82-0	ws82-14	OK	1.68223	1.70682	0.020934	-0.0345704	0.972422	0.997956	no
Glyma01g26670	Glyma01g26670	Glyma01g26670	Gm01:35431736-35435954	ws82-0	ws82-14	OK	0.982413	0.22641	-2.11739	2.50555	0.0122261	0.135173	no
Glyma01g26681	Glyma01g26681	Glyma01g26681	Gm01:35464370-35465052	ws82-0	ws82-14	NOTEST	0	0	0	0	1	1	no
Glyma01g26690	Glyma01g26690	Glyma01g26690	Gm01:35468032-35472931	ws82-0	ws82-14	OK	0.476089	0.391194	-0.283348	0.337351	0.735852	0.967372	no
Glyma01g26700	Glyma01g26700	Glyma01g26700	Gm01:35501543-35506434	ws82-0	ws82-14	OK	2.95516	3.06859	0.0543384	-0.103848	0.91729	0.993088	no
Glyma01g26750	Glyma01g26750	Glyma01g26750	Gm01:35572394-35581615	ws82-0	ws82-14	NOTEST	0.055672	0.0519997	-0.0984487	0.0610707	0.951303	1	no
Glyma01g26766	Glyma01g26766	Glyma01g26766	Gm01:35587717-35588464	ws82-0	ws82-14	NOTEST	0	0	0	0	1	1	no
Glyma01g26783	Glyma01g26783	Glyma01g26783	Gm01:35595556-35596652	ws82-0	ws82-14	NOTEST	0	0	0	0	1	1	no
Glyma01g26800	Glyma01g26800	Glyma01g26800	Gm01:35606472-35610217	ws82-0	ws82-14	NOTEST	0	0	0	0	1	1	no
Glyma01g26813	Glyma01g26813	Glyma01g26813	Gm01:35625153-35625890	ws82-0	ws82-14	NOTEST	0	0	0	0	1	1	no
Glyma01g26826	Glyma01g26826	Glyma01g26826	Gm01:35632686-35633208	ws82-0	ws82-14	NOTEST	0	0	0	0	1	1	no
Glyma01g26840	Glyma01g26840	Glyma01g26840	Gm01:35643767-35646603	ws82-0	ws82-14	OK	7.21557	14.4348	1.00037	-2.10943	0.0349071	0.262037	no
Glyma01g26860	Glyma01g26860	Glyma01g26860	Gm01:35688241-35692239	ws82-0	ws82-14	NOTEST	0	0	0	0	1	1	no
Glyma01g26900	Glyma01g26900	Glyma01g26900	Gm01:35719443-35723183	ws82-0	ws82-14	NOTEST	0	0	0	0	1	1	no
Glyma01g26915	Glyma01g26915	Glyma01g26915	Gm01:35827768-35828303	ws82-0	ws82-14	NOTEST	0	0	0	0	1	1	no
Glyma01g26930	Glyma01g26930	Glyma01g26930	Gm01:35832934-35837033	ws82-0	ws82-14	OK	27.856	15.8869	-0.810147	1.57397	0.115494	0.514473	no
Glyma01g26940	Glyma01g26940	Glyma01g26940	Gm01:35863797-35865409	ws82-0	ws82-14	OK	2.2896	4.55146	0.991234	-1.79094	0.0733035	0.404201	no
Glyma01g26950	Glyma01g26950	Glyma01g26950	Gm01:35866292-35869400	ws82-0	ws82-14	OK	37.3307	40.2983	0.110358	-0.237171	0.812524	0.978544	no
Glyma01g26961	Glyma01g26961	Glyma01g26961	Gm01:35952581-35954091	ws82-0	ws82-14	NOTEST	0	0	0	0	1	1	no
Glyma01g26970	Glyma01g26970	Glyma01g26970	Gm01:35963018-35964248	ws82-0	ws82-14	OK	18.6316	22.9686	0.301911	-0.680214	0.496369	0.893554	no
Glyma01g26981	Glyma01g26981	Glyma01g26981	Gm01:35964318-35966630	ws82-0	ws82-14	OK	6.97149	4.07194	-0.775748	0.966794	0.333647	0.803949	no
Glyma01g26990	Glyma01g26990	Glyma01g26990	Gm01:35968043-35972769	ws82-0	ws82-14	OK	1.43317	3.42465	1.25675	-2.37803	0.0174056	0.169717	no
Glyma01g27005	Glyma01g27005	Glyma01g27005	Gm01:35977333-35983210	ws82-0	ws82-14	OK	1.79588	3.27047	0.864805	-1.75227	0.0797274	0.4225	no
Glyma01g27020	Glyma01g27020	Glyma01g27020	Gm01:36004326-36005428	ws82-0	ws82-14	NOTEST	0.0355403	0	-1.79769e+308	-1.79769e+308	0.237134	1	no
Glyma01g27040	Glyma01g27040	Glyma01g27040	Gm01:36021672-36025699	ws82-0	ws82-14	NOTEST	0.133307	0.355446	1.41487	-1.59045	0.111732	1	no
Glyma01g27060	Glyma01g27060	Glyma01g27060	Gm01:36063450-36065354	ws82-0	ws82-14	OK	1.55884	3.76907	1.27373	-2.19085	0.0284628	0.231612	no
Glyma01g27110	Glyma01g27110	Glyma01g27110	Gm01:36127733-36131641	ws82-0	ws82-14	NOTEST	0	0	0	0	1	1	no
Glyma01g27120	Glyma01g27120	Glyma01g27120	Gm01:36147154-36151735	ws82-0	ws82-14	OK	1.61905	0.424731	-1.93053	2.70751	0.006779	0.0917544	no
Glyma01g27130	Glyma01g27130	Glyma01g27130	Gm01:36161870-36165133	ws82-0	ws82-14	OK	0.29402	0.443476	0.59294	-0.68393	0.49402	0.89256	no
Glyma01g27145	Glyma01g27145	Glyma01g27145	Gm01:36192774-36194659	ws82-0	ws82-14	NOTEST	0	0	0	0	1	1	no
Glyma01g27160	Glyma01g27160	Glyma01g27160	Gm01:36195997-36196273	ws82-0	ws82-14	NOTEST	0	0	0	0	1	1	no
Glyma01g27170	Glyma01g27170	Glyma01g27170	Gm01:36211478-36213198	ws82-0	ws82-14	OK	0.622217	1.89599	1.60747	-1.57522	0.115207	0.513803	no
Glyma01g27200	Glyma01g27200	Glyma01g27200	Gm01:36246044-36251145	ws82-0	ws82-14	OK	9.64338	7.99985	-0.269567	0.593199	0.553048	0.915688	no
Glyma01g27215	Glyma01g27215	Glyma01g27215	Gm01:36263859-36271059	ws82-0	ws82-14	NOTEST	0	0	0	0	1	1	no
Glyma01g27230	Glyma01g27230	Glyma01g27230	Gm01:36326563-36327062	ws82-0	ws82-14	NOTEST	0	0	0	0	1	1	no
Glyma01g27240	Glyma01g27240	Glyma01g27240	Gm01:36332421-36351694	ws82-0	ws82-14	OK	6.19644	4.5471	-0.446493	0.98836	0.322976	0.794561	no
Glyma01g27250	Glyma01g27250	Glyma01g27250	Gm01:36369066-36382267	ws82-0	ws82-14	OK	6.42541	5.7706	-0.155065	0.34827	0.727637	0.965616	no
Glyma01g27260	Glyma01g27260	Glyma01g27260	Gm01:36388728-36391729	ws82-0	ws82-14	NOTEST	0	0	0	0	1	1	no
Glyma01g27280	Glyma01g27280	Glyma01g27280	Gm01:36438459-36440199	ws82-0	ws82-14	OK	1.03332	1.47922	0.517553	-0.754369	0.450628	0.874411	no
Glyma01g27291	Glyma01g27291	Glyma01g27291	Gm01:36450899-36454001	ws82-0	ws82-14	NOTEST	0.123526	0	-1.79769e+308	-1.79769e+308	0.234503	1	no
Glyma01g27301	Glyma01g27301	Glyma01g27301	Gm01:36450899-36454001	ws82-0	ws82-14	NOTEST	0	0	0	0	1	1	no
Glyma01g27310	Glyma01g27310	Glyma01g27310	Gm01:36464465-36465566	ws82-0	ws82-14	NOTEST	0	0	0	0	1	1	no
Glyma01g27360	Glyma01g27360	Glyma01g27360	Gm01:36545021-36547291	ws82-0	ws82-14	NOTEST	0.108391	0.192714	0.830218	-0.95762	0.338255	1	no
Glyma01g27385	Glyma01g27385	Glyma01g27385	Gm01:36610052-36610460	ws82-0	ws82-14	NOTEST	0	0	0	0	1	1	no
Glyma01g27410	Glyma01g27410	Glyma01g27410	Gm01:36654803-36655111	ws82-0	ws82-14	NOTEST	0	0	0	0	1	1	no
Glyma01g27440	Glyma01g27440	Glyma01g27440	Gm01:36685735-36695527	ws82-0	ws82-14	NOTEST	0.0761289	0.0677526	-0.168166	0.150704	0.880209	1	no
Glyma01g27455	Glyma01g27455	Glyma01g27455	Gm01:36705021-36712560	ws82-0	ws82-14	NOTEST	0.141109	0.103849	-0.442329	0.520513	0.602706	1	no
Glyma01g27470	Glyma01g27470	Glyma01g27470	Gm01:36735448-36737186	ws82-0	ws82-14	NOTEST	0	0.0306108	1.79769e+308	1.79769e+308	0.162559	1	no
Glyma01g27490	Glyma01g27490	Glyma01g27490	Gm01:36794254-36798874	ws82-0	ws82-14	NOTEST	0.0284799	0.309875	3.44367	-1.23763	0.215854	1	no
Glyma01g27710	Glyma01g27710	Glyma01g27710	Gm01:36987889-36992462	ws82-0	ws82-14	OK	1.53029	4.02961	1.39683	-2.6623	0.00776091	0.100673	no
Glyma01g27720	Glyma01g27720	Glyma01g27720	Gm01:37036140-37038376	ws82-0	ws82-14	OK	0.680849	0.518503	-0.392982	0.516622	0.60542	0.93179	no
Glyma01g27765	Glyma01g27765	Glyma01g27765	Gm01:37212445-37213145	ws82-0	ws82-14	NOTEST	0	0	0	0	1	1	no
Glyma01g27810	Glyma01g27810	Glyma01g27810	Gm01:37231576-37233997	ws82-0	ws82-14	OK	17.8441	7.85695	-1.18341	2.63931	0.00830755	0.105429	no
Glyma01g27840	Glyma01g27840	Glyma01g27840	Gm01:37299487-37305059	ws82-0	ws82-14	OK	13.1396	28.1037	1.09684	-2.43567	0.0148642	0.153495	no
Glyma01g27860	Glyma01g27860	Glyma01g27860	Gm01:37321469-37321784	ws82-0	ws82-14	NOTEST	0	0	0	0	1	1	no
Glyma01g27890	Glyma01g27890	Glyma01g27890	Gm01:37336991-37338203	ws82-0	ws82-14	OK	0	1.13955	1.79769e+308	1.79769e+308	0.003095	0.0538112	no
Glyma01g27900	Glyma01g27900	Glyma01g27900	Gm01:37379998-37383931	ws82-0	ws82-14	OK	14.5972	15.9671	0.129404	-0.290489	0.771442	0.972001	no
Glyma01g27910	Glyma01g27910	Glyma01g27910	Gm01:37406845-37408224	ws82-0	ws82-14	NOTEST	0	0	0	0	1	1	no
Glyma01g27941	Glyma01g27941	Glyma01g27941	Gm01:37433263-37434146	ws82-0	ws82-14	NOTEST	0	0	0	0	1	1	no
Glyma01g27970	Glyma01g27970	Glyma01g27970	Gm01:37457417-37460795	ws82-0	ws82-14	NOTEST	0.0496376	0	-1.79769e+308	-1.79769e+308	0.155783	1	no
Glyma01g28026	Glyma01g28026	Glyma01g28026	Gm01:37580338-37581229	ws82-0	ws82-14	NOTEST	0	0	0	0	1	1	no
Glyma01g28082	Glyma01g28082	Glyma01g28082	Gm01:37587054-37587942	ws82-0	ws82-14	NOTEST	0	0	0	0	1	1	no
Glyma01g28139	Glyma01g28139	Glyma01g28139	Gm01:37594369-37595242	ws82-0	ws82-14	NOTEST	0	0	0	0	1	1	no
Glyma01g28196	Glyma01g28196	Glyma01g28196	Gm01:37611247-37612183	ws82-0	ws82-14	NOTEST	0	0	0	0	1	1	no
Glyma01g28253	Glyma01g28253	Glyma01g28253	Gm01:37911350-37912244	ws82-0	ws82-14	NOTEST	0	0	0	0	1	1	no
Glyma01g28310	Glyma01g28310	Glyma01g28310	Gm01:37913283-37917411	ws82-0	ws82-14	OK	2.77889	3.61006	0.377512	-0.597994	0.549844	0.915107	no
Glyma01g28353	Glyma01g28353	Glyma01g28353	Gm01:38060909-38061301	ws82-0	ws82-14	NOTEST	0	0	0	0	1	1	no
Glyma01g28396	Glyma01g28396	Glyma01g28396	Gm01:38199627-38200321	ws82-0	ws82-14	OK	256.939	100.025	-1.36107	3.01304	0.00258648	0.0473379	yes
Glyma01g28440	Glyma01g28440	Glyma01g28440	Gm01:38205261-38207629	ws82-0	ws82-14	OK	3.15242	2.62885	-0.262028	0.520115	0.602984	0.930329	no
Glyma01g28460	Glyma01g28460	Glyma01g28460	Gm01:38222786-38224222	ws82-0	ws82-14	NOTEST	0	0	0	0	1	1	no
Glyma01g28480	Glyma01g28480	Glyma01g28480	Gm01:38248791-38250401	ws82-0	ws82-14	NOTEST	0	0	0	0	1	1	no
Glyma01g28491	Glyma01g28491	Glyma01g28491	Gm01:38259681-38270227	ws82-0	ws82-14	NOTEST	0	0	0	0	1	1	no
Glyma01g28500	Glyma01g28500	Glyma01g28500	Gm01:38308110-38309077	ws82-0	ws82-14	OK	70.8933	39.2641	-0.852436	1.90746	0.0564606	0.347484	no
Glyma01g28511	Glyma01g28511	Glyma01g28511	Gm01:38309608-38311167	ws82-0	ws82-14	NOTEST	0.0367415	0.0336193	-0.128118	0.0626485	0.950046	1	no
Glyma01g28520	Glyma01g28520	Glyma01g28520	Gm01:38386523-38391051	ws82-0	ws82-14	OK	7.0019	4.05795	-0.786995	1.38524	0.165978	0.60715	no
Glyma01g28550	Glyma01g28550	Glyma01g28550	Gm01:38422858-38424428	ws82-0	ws82-14	NOTEST	0	0	0	0	1	1	no
Glyma01g28626	Glyma01g28626	Glyma01g28626	Gm01:38529390-38530425	ws82-0	ws82-14	NOTEST	0	0	0	0	1	1	no
Glyma01g28703	Glyma01g28703	Glyma01g28703	Gm01:38575000-38577422	ws82-0	ws82-14	OK	1.64909	4.16541	1.33679	-1.76632	0.0773414	0.415672	no
Glyma01g28780	Glyma01g28780	Glyma01g28780	Gm01:38596171-38598279	ws82-0	ws82-14	NOTEST	0.103457	0.191248	0.886407	-0.915899	0.35972	1	no
Glyma01g28800	Glyma01g28800	Glyma01g28800	Gm01:38660680-38662575	ws82-0	ws82-14	NOTEST	0	0	0	0	1	1	no
Glyma01g28805	Glyma01g28805	Glyma01g28805	Gm01:38690273-38690984	ws82-0	ws82-14	NOTEST	0	0	0	0	1	1	no
Glyma01g28810	Glyma01g28810	Glyma01g28810	Gm01:38692764-38695649	ws82-0	ws82-14	OK	2396.8	1599.77	-0.583238	0.738643	0.460124	0.879161	no
Glyma01g28820	Glyma01g28820	Glyma01g28820	Gm01:38703774-38707276	ws82-0	ws82-14	OK	76.8783	82.883	0.1085	-0.203252	0.838938	0.981535	no
Glyma01g28830	Glyma01g28830	Glyma01g28830	Gm01:38709310-38713735	ws82-0	ws82-14	OK	9.49405	13.3502	0.491768	-1.09567	0.273223	0.748447	no
Glyma01g28841	Glyma01g28841	Glyma01g28841	Gm01:38749817-38751606	ws82-0	ws82-14	NOTEST	0	0	0	0	1	1	no
Glyma01g28850	Glyma01g28850	Glyma01g28850	Gm01:38758937-38772979	ws82-0	ws82-14	NOTEST	0.0318165	0	-1.79769e+308	-1.79769e+308	0.155783	1	no
Glyma01g28865	Glyma01g28865	Glyma01g28865	Gm01:38774846-38778332	ws82-0	ws82-14	NOTEST	0	0	0	0	1	1	no
Glyma01g28880	Glyma01g28880	Glyma01g28880	Gm01:38811474-38819368	ws82-0	ws82-14	NOTEST	0.0335416	0	-1.79769e+308	-1.79769e+308	0.155783	1	no
Glyma01g28890	Glyma01g28890	Glyma01g28890	Gm01:38825959-38830479	ws82-0	ws82-14	NOTEST	0	0	0	0	1	1	no
Glyma01g28936	Glyma01g28936	Glyma01g28936	Gm01:38986023-38989868	ws82-0	ws82-14	OK	0.877701	0.217672	-2.01158	2.82807	0.00468296	0.0712332	no
Glyma01g28983	Glyma01g28983	Glyma01g28983	Gm01:39101552-39101978	ws82-0	ws82-14	NOTEST	0	0	0	0	1	1	no
Glyma01g29030	Glyma01g29030	Glyma01g29030	Gm01:39117816-39121119	ws82-0	ws82-14	NOTEST	0.12566	0.327023	1.37987	-1.61231	0.106894	1	no
Glyma01g29070	Glyma01g29070	Glyma01g29070	Gm01:39200746-39201279	ws82-0	ws82-14	NOTEST	0	0	0	0	1	1	no
Glyma01g29091	Glyma01g29091	Glyma01g29091	Gm01:39202322-39203074	ws82-0	ws82-14	NOTEST	0	0	0	0	1	1	no
Glyma01g29110	Glyma01g29110	Glyma01g29110	Gm01:39206637-39207905	ws82-0	ws82-14	NOTEST	0	0	0	0	1	1	no
Glyma01g29131	Glyma01g29131	Glyma01g29131	Gm01:39211228-39211501	ws82-0	ws82-14	NOTEST	0	0	0	0	1	1	no
Glyma01g29150	Glyma01g29150	Glyma01g29150	Gm01:39249319-39254445	ws82-0	ws82-14	OK	1.15664	1.99039	0.783121	-1.41606	0.156757	0.594037	no
Glyma01g29171	Glyma01g29171	Glyma01g29171	Gm01:39255360-39265417	ws82-0	ws82-14	OK	2.45161	2.72576	0.152931	-0.258047	0.796371	0.975616	no
Glyma01g29190	Glyma01g29190	Glyma01g29190	Gm01:39285279-39288819	ws82-0	ws82-14	NOTEST	0	0.031373	1.79769e+308	1.79769e+308	0.166461	1	no
Glyma01g29220	Glyma01g29220	Glyma01g29220	Gm01:39316166-39317298	ws82-0	ws82-14	NOTEST	0	0	0	0	1	1	no
Glyma01g29230	Glyma01g29230	Glyma01g29230	Gm01:39317900-39318629	ws82-0	ws82-14	NOTEST	0	0	0	0	1	1	no
Glyma01g29255	Glyma01g29255	Glyma01g29255	Gm01:39318953-39319509	ws82-0	ws82-14	NOTEST	0	0	0	0	1	1	no
Glyma01g29280	Glyma01g29280	Glyma01g29280	Gm01:39350672-39358098	ws82-0	ws82-14	OK	2.82121	3.69094	0.387673	-0.727937	0.466652	0.881845	no
Glyma01g29305	Glyma01g29305	Glyma01g29305	Gm01:39376341-39388072	ws82-0	ws82-14	OK	5.84667	3.1297	-0.901593	1.62569	0.104015	0.489171	no
Glyma01g29330	Glyma01g29330	Glyma01g29330	Gm01:39403861-39412277	ws82-0	ws82-14	OK	11.9489	9.68811	-0.302587	0.678853	0.497231	0.893614	no
Glyma01g29346	Glyma01g29346	Glyma01g29346	Gm01:39421332-39429591	ws82-0	ws82-14	OK	3.70205	2.33557	-0.664551	1.11332	0.265569	0.740613	no
Glyma01g29362	Glyma01g29362	Glyma01g29362	Gm01:39443729-39458833	ws82-0	ws82-14	OK	10.5556	4.87542	-1.11441	2.30343	0.0212545	0.192871	no
Glyma01g29378	Glyma01g29378	Glyma01g29378	Gm01:39478263-39516299	ws82-0	ws82-14	OK	5.88593	4.93721	-0.253575	0.543495	0.586789	0.925549	no
Glyma01g29394	Glyma01g29394	Glyma01g29394	Gm01:39526777-39530894	ws82-0	ws82-14	OK	0.723279	0.799098	0.14382	-0.214297	0.830315	0.98074	no
Glyma01g29410	Glyma01g29410	Glyma01g29410	Gm01:39591646-39594997	ws82-0	ws82-14	OK	1.36461	1.23029	-0.149495	0.22698	0.820439	0.979224	no
Glyma01g29420	Glyma01g29420	Glyma01g29420	Gm01:39597740-39602942	ws82-0	ws82-14	OK	6.92719	7.59582	0.132936	-0.291655	0.77055	0.971975	no
Glyma01g29440	Glyma01g29440	Glyma01g29440	Gm01:39655886-39656000	ws82-0	ws82-14	NOTEST	0	0	0	0	1	1	no
Glyma01g29470	Glyma01g29470	Glyma01g29470	Gm01:39787035-39797571	ws82-0	ws82-14	OK	11.0306	1.96529	-2.4887	4.87451	1.09078e-06	0.000102215	yes
Glyma01g29480	Glyma01g29480	Glyma01g29480	Gm01:39799515-39801235	ws82-0	ws82-14	NOTEST	0	0	0	0	1	1	no
Glyma01g29495	Glyma01g29495	Glyma01g29495	Gm01:39818462-39819244	ws82-0	ws82-14	NOTEST	0	0	0	0	1	1	no
Glyma01g29511	Glyma01g29511	Glyma01g29511	Gm01:39824538-39825839	ws82-0	ws82-14	NOTEST	0	0	0	0	1	1	no
Glyma01g29525	Glyma01g29525	Glyma01g29525	Gm01:39837032-39837374	ws82-0	ws82-14	NOTEST	0	0	0	0	1	1	no
Glyma01g29540	Glyma01g29540	Glyma01g29540	Gm01:39848379-39851083	ws82-0	ws82-14	OK	20.0627	16.3963	-0.291145	0.655824	0.511937	0.898285	no
Glyma01g29570	Glyma01g29570	Glyma01g29570	Gm01:39879227-39883100	ws82-0	ws82-14	NOTEST	0.124665	0.205552	0.72145	-0.848457	0.396184	1	no
Glyma01g29580	Glyma01g29580	Glyma01g29580	Gm01:39898856-39902291	ws82-0	ws82-14	NOTEST	0.0162919	0.00841058	-0.953876	0.367466	0.713272	1	no
Glyma01g29600	Glyma01g29600	Glyma01g29600	Gm01:39918097-39921140	ws82-0	ws82-14	NOTEST	0	0	0	0	1	1	no
Glyma01g29615	Glyma01g29615	Glyma01g29615	Gm01:39935345-39939812	ws82-0	ws82-14	NOTEST	0.00850715	0.0365834	2.10444	-0.948283	0.342986	1	no
Glyma01g29630	Glyma01g29630	Glyma01g29630	Gm01:39945735-39949387	ws82-0	ws82-14	OK	16.4174	29.1932	0.830402	-1.78941	0.0735496	0.405012	no
Glyma01g29643	Glyma01g29643	Glyma01g29643	Gm01:39958765-39959672	ws82-0	ws82-14	NOTEST	0	0	0	0	1	1	no
Glyma01g29656	Glyma01g29656	Glyma01g29656	Gm01:39965927-39966511	ws82-0	ws82-14	NOTEST	0	0	0	0	1	1	no
Glyma01g29670	Glyma01g29670	Glyma01g29670	Gm01:39988960-39991138	ws82-0	ws82-14	OK	0.566105	0.767438	0.438982	-0.589122	0.55578	0.917157	no
Glyma01g29715	Glyma01g29715	Glyma01g29715	Gm01:40029815-40030406	ws82-0	ws82-14	NOTEST	0	0	0	0	1	1	no
Glyma01g29760	Glyma01g29760	Glyma01g29760	Gm01:40077200-40079998	ws82-0	ws82-14	NOTEST	0.0687915	0.147003	1.09555	-0.751823	0.452158	1	no
Glyma01g29816	Glyma01g29816	Glyma01g29816	Gm01:40154962-40155672	ws82-0	ws82-14	NOTEST	0.0532612	0.0489858	-0.120723	0.0340822	0.972812	1	no
Glyma01g29873	Glyma01g29873	Glyma01g29873	Gm01:40234344-40236298	ws82-0	ws82-14	NOTEST	0	0	0	0	1	1	no
Glyma01g29930	Glyma01g29930	Glyma01g29930	Gm01:40499102-40503250	ws82-0	ws82-14	OK	41.7407	8.06452	-2.37179	4.99799	5.79322e-07	6.13143e-05	yes
Glyma01g29950	Glyma01g29950	Glyma01g29950	Gm01:40560867-40564466	ws82-0	ws82-14	OK	18.2018	11.8523	-0.618911	1.38983	0.164579	0.605361	no
Glyma01g29970	Glyma01g29970	Glyma01g29970	Gm01:40574051-40575558	ws82-0	ws82-14	NOTEST	0	0	0	0	1	1	no
Glyma01g30000	Glyma01g30000	Glyma01g30000	Gm01:40668497-40669995	ws82-0	ws82-14	NOTEST	0	0	0	0	1	1	no
Glyma01g30010	Glyma01g30010	Glyma01g30010	Gm01:40681967-40683465	ws82-0	ws82-14	NOTEST	0	0	0	0	1	1	no
Glyma01g30020	Glyma01g30020	Glyma01g30020	Gm01:40733504-40735002	ws82-0	ws82-14	NOTEST	0	0	0	0	1	1	no
Glyma01g30030	Glyma01g30030	Glyma01g30030	Gm01:40745198-40746696	ws82-0	ws82-14	NOTEST	0	0	0	0	1	1	no
Glyma01g30040	Glyma01g30040	Glyma01g30040	Gm01:40756924-40758421	ws82-0	ws82-14	NOTEST	0	0	0	0	1	1	no
Glyma01g30060	Glyma01g30060	Glyma01g30060	Gm01:40769686-40771162	ws82-0	ws82-14	NOTEST	0	0	0	0	1	1	no
Glyma01g30080	Glyma01g30080	Glyma01g30080	Gm01:40777029-40778052	ws82-0	ws82-14	NOTEST	0	0	0	0	1	1	no
Glyma01g30300	Glyma01g30300	Glyma01g30300	Gm01:40952282-40957143	ws82-0	ws82-14	OK	2.51397	3.7608	0.581068	-1.10477	0.26926	0.744683	no
Glyma01g30320	Glyma01g30320	Glyma01g30320	Gm01:40964890-40985483	ws82-0	ws82-14	OK	6.61955	5.46701	-0.275981	0.604253	0.545676	0.913041	no
Glyma01g30335	Glyma01g30335	Glyma01g30335	Gm01:40964890-40985483	ws82-0	ws82-14	OK	0.572555	0.774085	0.435077	-0.218241	0.827241	0.979963	no
Glyma01g30350	Glyma01g30350	Glyma01g30350	Gm01:41014087-41016040	ws82-0	ws82-14	OK	60.0193	54.9169	-0.128175	0.279399	0.779939	0.973263	no
Glyma01g30370	Glyma01g30370	Glyma01g30370	Gm01:41043490-41043758	ws82-0	ws82-14	NOTEST	0	0	0	0	1	1	no
Glyma01g30390	Glyma01g30390	Glyma01g30390	Gm01:41062775-41066889	ws82-0	ws82-14	OK	7.70872	2.07205	-1.89543	3.51938	0.000432565	0.0125524	yes
Glyma01g30400	Glyma01g30400	Glyma01g30400	Gm01:41067190-41075707	ws82-0	ws82-14	OK	10.2717	9.67005	-0.0870867	0.195685	0.844857	0.982949	no
Glyma01g30431	Glyma01g30431	Glyma01g30431	Gm01:41163921-41165539	ws82-0	ws82-14	NOTEST	0	0	0	0	1	1	no
Glyma01g30460	Glyma01g30460	Glyma01g30460	Gm01:41170972-41176563	ws82-0	ws82-14	NOTEST	0.403545	0.111855	-1.85109	0.587071	0.557156	1	no
Glyma01g30485	Glyma01g30485	Glyma01g30485	Gm01:41170972-41176563	ws82-0	ws82-14	OK	1.43131	1.74728	0.287775	-0.495801	0.620035	0.936734	no
Glyma01g30511	Glyma01g30511	Glyma01g30511	Gm01:41210645-41210897	ws82-0	ws82-14	NOTEST	0	0	0	0	1	1	no
Glyma01g30535	Glyma01g30535	Glyma01g30535	Gm01:41215563-41218988	ws82-0	ws82-14	NOTEST	0	0	0	0	1	1	no
Glyma01g30560	Glyma01g30560	Glyma01g30560	Gm01:41232630-41234794	ws82-0	ws82-14	NOTEST	0	0	0	0	1	1	no
Glyma01g30610	Glyma01g30610	Glyma01g30610	Gm01:41406971-41411553	ws82-0	ws82-14	NOTEST	0	0.0598455	1.79769e+308	1.79769e+308	0.082025	1	no
Glyma01g30626	Glyma01g30626	Glyma01g30626	Gm01:41440314-41440973	ws82-0	ws82-14	NOTEST	0	0	0	0	1	1	no
Glyma01g30643	Glyma01g30643	Glyma01g30643	Gm01:41457347-41461938	ws82-0	ws82-14	NOTEST	0	0	0	0	1	1	no
Glyma01g30660	Glyma01g30660	Glyma01g30660	Gm01:41493462-41493999	ws82-0	ws82-14	NOTEST	0	0	0	0	1	1	no
Glyma01g30670	Glyma01g30670	Glyma01g30670	Gm01:41495108-41496829	ws82-0	ws82-14	NOTEST	0.208703	0.102183	-1.0303	0.81174	0.416941	1	no
Glyma01g30900	Glyma01g30900	Glyma01g30900	Gm01:41673575-41673782	ws82-0	ws82-14	NOTEST	0	0	0	0	1	1	no
Glyma01g30910	Glyma01g30910	Glyma01g30910	Gm01:41681659-41690953	ws82-0	ws82-14	OK	12.1347	13.0311	0.10282	-0.228146	0.819533	0.979224	no
Glyma01g30920	Glyma01g30920	Glyma01g30920	Gm01:41691541-41699290	ws82-0	ws82-14	NOTEST	0.162065	0.199244	0.297965	-0.334208	0.738222	1	no
Glyma01g30982	Glyma01g30982	Glyma01g30982	Gm01:41712879-41714252	ws82-0	ws82-14	OK	3.24268	3.00699	-0.108869	0.179353	0.857661	0.984556	no
Glyma01g31044	Glyma01g31044	Glyma01g31044	Gm01:41890431-41892644	ws82-0	ws82-14	OK	1.3491	1.96328	0.541272	-0.836998	0.402594	0.848647	no
Glyma01g31107	Glyma01g31107	Glyma01g31107	Gm01:41928201-41933073	ws82-0	ws82-14	NOTEST	0	0	0	0	1	1	no
Glyma01g31170	Glyma01g31170	Glyma01g31170	Gm01:41986790-41991338	ws82-0	ws82-14	OK	2.29583	2.14675	-0.096861	0.196559	0.844173	0.982943	no
Glyma01g31180	Glyma01g31180	Glyma01g31180	Gm01:41992765-41993572	ws82-0	ws82-14	OK	1.63859	1.92532	0.232637	-0.314594	0.75307	0.969604	no
Glyma01g31230	Glyma01g31230	Glyma01g31230	Gm01:42040491-42046500	ws82-0	ws82-14	NOTEST	0	0	0	0	1	1	no
Glyma01g31260	Glyma01g31260	Glyma01g31260	Gm01:42062020-42069161	ws82-0	ws82-14	OK	3.07309	1.45957	-1.07415	2.06712	0.0387227	0.278449	no
Glyma01g31270	Glyma01g31270	Glyma01g31270	Gm01:42071523-42074445	ws82-0	ws82-14	OK	6.05457	5.78817	-0.064919	0.12982	0.896709	0.990642	no
Glyma01g31275	Glyma01g31275	Glyma01g31275	Gm01:42077853-42078844	ws82-0	ws82-14	NOTEST	0	0	0	0	1	1	no
Glyma01g31280	Glyma01g31280	Glyma01g31280	Gm01:42077853-42078844	ws82-0	ws82-14	NOTEST	0	0	0	0	1	1	no
Glyma01g31300	Glyma01g31300	Glyma01g31300	Gm01:42124055-42127597	ws82-0	ws82-14	OK	3.77114	33.0902	3.13333	-6.1372	8.39879e-10	2.17995e-07	yes
Glyma01g31311	Glyma01g31311	Glyma01g31311	Gm01:42143417-42149831	ws82-0	ws82-14	OK	12.8659	16.7986	0.38479	-0.837021	0.402581	0.848647	no
Glyma01g31320	Glyma01g31320	Glyma01g31320	Gm01:42162374-42164312	ws82-0	ws82-14	OK	6.8891	15.0589	1.12823	-2.48854	0.012827	0.13909	no
Glyma01g31341	Glyma01g31341	Glyma01g31341	Gm01:42226588-42230852	ws82-0	ws82-14	NOTEST	0	0.032847	1.79769e+308	1.79769e+308	0.162559	1	no
Glyma01g31360	Glyma01g31360	Glyma01g31360	Gm01:42232501-42236451	ws82-0	ws82-14	OK	20.4058	24.0472	0.236891	-0.493249	0.621836	0.93747	no
Glyma01g31370	Glyma01g31370	Glyma01g31370	Gm01:42261741-42265856	ws82-0	ws82-14	NOTEST	0.106827	0.146925	0.459806	-0.461766	0.644249	1	no
Glyma01g31425	Glyma01g31425	Glyma01g31425	Gm01:42373253-42374275	ws82-0	ws82-14	OK	1.08661	2.77611	1.35324	-1.50442	0.132472	0.550266	no
Glyma01g31480	Glyma01g31480	Glyma01g31480	Gm01:42378220-42384123	ws82-0	ws82-14	OK	0.565219	0.70191	0.312475	-0.488562	0.625152	0.939436	no
Glyma01g31520	Glyma01g31520	Glyma01g31520	Gm01:42469464-42474210	ws82-0	ws82-14	NOTEST	0	0	0	0	1	1	no
Glyma01g31550	Glyma01g31550	Glyma01g31550	Gm01:42548413-42558287	ws82-0	ws82-14	NOTEST	0.0161858	0	-1.79769e+308	-1.79769e+308	0.277396	1	no
Glyma01g31570	Glyma01g31570	Glyma01g31570	Gm01:42586307-42593931	ws82-0	ws82-14	OK	3.65931	3.13641	-0.222459	0.444676	0.656554	0.946944	no
Glyma01g31581	Glyma01g31581	Glyma01g31581	Gm01:42597638-42599280	ws82-0	ws82-14	NOTEST	0	0	0	0	1	1	no
Glyma01g31590	Glyma01g31590	Glyma01g31590	Gm01:42607296-42611243	ws82-0	ws82-14	NOTEST	0.267376	0.341399	0.35259	-0.475973	0.634093	1	no
Glyma01g31600	Glyma01g31600	Glyma01g31600	Gm01:42628300-42629673	ws82-0	ws82-14	OK	51.2813	55.4649	0.113142	-0.245765	0.805864	0.977523	no
Glyma01g31610	Glyma01g31610	Glyma01g31610	Gm01:42631340-42634983	ws82-0	ws82-14	OK	25.4079	26.1734	0.0428226	-0.0959055	0.923596	0.993813	no
Glyma01g31630	Glyma01g31630	Glyma01g31630	Gm01:42661065-42664809	ws82-0	ws82-14	OK	5.33765	6.45978	0.275279	-0.454092	0.649763	0.945512	no
Glyma01g31636	Glyma01g31636	Glyma01g31636	Gm01:42667422-42670895	ws82-0	ws82-14	NOTEST	0	0	0	0	1	1	no
Glyma01g31643	Glyma01g31643	Glyma01g31643	Gm01:42681129-42683618	ws82-0	ws82-14	NOTEST	0	0	0	0	1	1	no
Glyma01g31650	Glyma01g31650	Glyma01g31650	Gm01:42697267-42701819	ws82-0	ws82-14	NOTEST	0	0	0	0	1	1	no
Glyma01g31660	Glyma01g31660	Glyma01g31660	Gm01:42724418-42726114	ws82-0	ws82-14	OK	0.166046	0.506834	1.60993	-1.57763	0.114651	0.513173	no
Glyma01g31670	Glyma01g31670	Glyma01g31670	Gm01:42752424-42753269	ws82-0	ws82-14	NOTEST	0	0	0	0	1	1	no
Glyma01g31691	Glyma01g31691	Glyma01g31691	Gm01:42756407-42766923	ws82-0	ws82-14	NOTEST	0	0	0	0	1	1	no
Glyma01g31711	Glyma01g31711	Glyma01g31711	Gm01:42786261-42789612	ws82-0	ws82-14	NOTEST	0	0	0	0	1	1	no
Glyma01g31730	Glyma01g31730	Glyma01g31730	Gm01:42867418-42868294	ws82-0	ws82-14	NOTEST	0.0752889	0.0737047	-0.0306807	0.0100158	0.992009	1	no
Glyma01g31750	Glyma01g31750	Glyma01g31750	Gm01:42942064-42943179	ws82-0	ws82-14	OK	39.1237	107.462	1.45771	-3.15771	0.00159016	0.0333322	yes
Glyma01g31760	Glyma01g31760	Glyma01g31760	Gm01:42947350-42947710	ws82-0	ws82-14	NOTEST	0	0	0	0	1	1	no
Glyma01g31780	Glyma01g31780	Glyma01g31780	Gm01:42956928-42957282	ws82-0	ws82-14	NOTEST	0	0	0	0	1	1	no
Glyma01g31801	Glyma01g31801	Glyma01g31801	Gm01:43007888-43008997	ws82-0	ws82-14	NOTEST	0	0	0	0	1	1	no
Glyma01g31820	Glyma01g31820	Glyma01g31820	Gm01:43013160-43013421	ws82-0	ws82-14	OK	20.825	0	-1.79769e+308	-1.79769e+308	0.237134	0.709387	no
Glyma01g31830	Glyma01g31830	Glyma01g31830	Gm01:43025615-43026886	ws82-0	ws82-14	OK	12.0296	9.01114	-0.416808	0.899273	0.368507	0.827636	no
Glyma01g31840	Glyma01g31840	Glyma01g31840	Gm01:43069330-43072880	ws82-0	ws82-14	OK	0.758925	1.66223	1.13109	-1.91191	0.0558883	0.345319	no
Glyma01g31850	Glyma01g31850	Glyma01g31850	Gm01:43076459-43079732	ws82-0	ws82-14	NOTEST	0.0564419	0.104182	0.884262	-0.501633	0.615926	1	no
Glyma01g31860	Glyma01g31860	Glyma01g31860	Gm01:43090292-43094391	ws82-0	ws82-14	NOTEST	0	0	0	0	1	1	no
Glyma01g31890	Glyma01g31890	Glyma01g31890	Gm01:43130697-43137550	ws82-0	ws82-14	OK	0.695752	0.534041	-0.381623	0.449099	0.65336	0.946814	no
Glyma01g31900	Glyma01g31900	Glyma01g31900	Gm01:43140964-43144007	ws82-0	ws82-14	OK	1.31109	0.309719	-2.08173	2.76935	0.00561687	0.0803561	no
Glyma01g31910	Glyma01g31910	Glyma01g31910	Gm01:43154205-43156585	ws82-0	ws82-14	NOTEST	0	0	0	0	1	1	no
Glyma01g31921	Glyma01g31921	Glyma01g31921	Gm01:43157131-43160950	ws82-0	ws82-14	NOTEST	0.404221	0.383454	-0.0760906	0.0795215	0.936618	1	no
Glyma01g31930	Glyma01g31930	Glyma01g31930	Gm01:43173872-43179341	ws82-0	ws82-14	OK	2.55797	3.10159	0.278006	-0.580818	0.561363	0.918919	no
Glyma01g31940	Glyma01g31940	Glyma01g31940	Gm01:43217711-43224924	ws82-0	ws82-14	NOTEST	0.226036	0.226783	0.00476192	-0.00482055	0.996154	1	no
Glyma01g31961	Glyma01g31961	Glyma01g31961	Gm01:43241123-43245445	ws82-0	ws82-14	NOTEST	0	0	0	0	1	1	no
Glyma01g31980	Glyma01g31980	Glyma01g31980	Gm01:43250905-43255641	ws82-0	ws82-14	NOTEST	0.104037	0.360234	1.79184	-0.420066	0.674437	1	no
Glyma01g31990	Glyma01g31990	Glyma01g31990	Gm01:43250905-43255641	ws82-0	ws82-14	OK	4.91817	7.30491	0.570744	-1.088	0.276596	0.751315	no
Glyma01g32000	Glyma01g32000	Glyma01g32000	Gm01:43264508-43272659	ws82-0	ws82-14	OK	7.23918	7.96079	0.137086	-0.304101	0.761051	0.970744	no
Glyma01g32010	Glyma01g32010	Glyma01g32010	Gm01:43337913-43338530	ws82-0	ws82-14	NOTEST	0	0	0	0	1	1	no
Glyma01g32020	Glyma01g32020	Glyma01g32020	Gm01:43341907-43343025	ws82-0	ws82-14	NOTEST	0	0	0	0	1	1	no
Glyma01g32031	Glyma01g32031	Glyma01g32031	Gm01:43354010-43355755	ws82-0	ws82-14	NOTEST	0	0	0	0	1	1	no
Glyma01g32040	Glyma01g32040	Glyma01g32040	Gm01:43398690-43400994	ws82-0	ws82-14	NOTEST	0.340725	0.343716	0.0126086	-0.0125937	0.989952	1	no
Glyma01g32070	Glyma01g32070	Glyma01g32070	Gm01:43424973-43427243	ws82-0	ws82-14	OK	2.25662	1.13372	-0.9931	1.39755	0.162247	0.601803	no
Glyma01g32081	Glyma01g32081	Glyma01g32081	Gm01:43450179-43450730	ws82-0	ws82-14	NOTEST	0	0	0	0	1	1	no
Glyma01g32090	Glyma01g32090	Glyma01g32090	Gm01:43463846-43470841	ws82-0	ws82-14	OK	21.9451	5.56756	-1.97878	4.3291	1.49718e-05	0.000851544	yes
Glyma01g32103	Glyma01g32103	Glyma01g32103	Gm01:43463846-43470841	ws82-0	ws82-14	OK	0.985601	0.212987	-2.21023	0.45211	0.651189	0.946235	no
Glyma01g32116	Glyma01g32116	Glyma01g32116	Gm01:43502972-43506823	ws82-0	ws82-14	NOTEST	0.034026	0.0604698	0.829577	-0.470611	0.637918	1	no
Glyma01g32130	Glyma01g32130	Glyma01g32130	Gm01:43553617-43555903	ws82-0	ws82-14	NOTEST	0.0643242	0.120392	0.904302	-0.401229	0.688251	1	no
Glyma01g32140	Glyma01g32140	Glyma01g32140	Gm01:43570735-43574743	ws82-0	ws82-14	OK	3.7271	2.74112	-0.443288	0.706766	0.479712	0.887545	no
Glyma01g32160	Glyma01g32160	Glyma01g32160	Gm01:43604977-43607065	ws82-0	ws82-14	NOTEST	0	0	0	0	1	1	no
Glyma01g32190	Glyma01g32190	Glyma01g32190	Gm01:43621003-43623360	ws82-0	ws82-14	NOTEST	0	0	0	0	1	1	no
Glyma01g32211	Glyma01g32211	Glyma01g32211	Gm01:43638172-43638537	ws82-0	ws82-14	NOTEST	0	0	0	0	1	1	no
Glyma01g32230	Glyma01g32230	Glyma01g32230	Gm01:43687454-43687922	ws82-0	ws82-14	NOTEST	0.160805	0.16693	0.0539307	-0.0186475	0.985122	1	no
Glyma01g32270	Glyma01g32270	Glyma01g32270	Gm01:43720350-43722510	ws82-0	ws82-14	NOTEST	0	0.0416958	1.79769e+308	1.79769e+308	0.162559	1	no
Glyma01g32291	Glyma01g32291	Glyma01g32291	Gm01:43773470-43774094	ws82-0	ws82-14	NOTEST	0	0.223593	1.79769e+308	1.79769e+308	0.162559	1	no
Glyma01g32310	Glyma01g32310	Glyma01g32310	Gm01:43784204-43786716	ws82-0	ws82-14	NOTEST	0	0	0	0	1	1	no
Glyma01g32340	Glyma01g32340	Glyma01g32340	Gm01:43819827-43820154	ws82-0	ws82-14	NOTEST	0	0	0	0	1	1	no
Glyma01g32360	Glyma01g32360	Glyma01g32360	Gm01:43828911-43832736	ws82-0	ws82-14	NOTEST	0.0687672	0	-1.79769e+308	-1.79769e+308	0.0762003	1	no
Glyma01g32370	Glyma01g32370	Glyma01g32370	Gm01:43834206-43835697	ws82-0	ws82-14	OK	10.3357	4.12785	-1.32417	2.66218	0.00776353	0.100673	no
Glyma01g32380	Glyma01g32380	Glyma01g32380	Gm01:43870379-43873398	ws82-0	ws82-14	OK	1.79372	2.26759	0.338212	-0.642264	0.520702	0.901346	no
Glyma01g32390	Glyma01g32390	Glyma01g32390	Gm01:43912452-43917776	ws82-0	ws82-14	NOTEST	0.0659804	0.0605157	-0.124728	0.0431784	0.965559	1	no
Glyma01g32400	Glyma01g32400	Glyma01g32400	Gm01:43922908-43926832	ws82-0	ws82-14	OK	5.57679	8.77966	0.65473	-1.45569	0.145479	0.577156	no
Glyma01g32415	Glyma01g32415	Glyma01g32415	Gm01:43929164-43930175	ws82-0	ws82-14	NOTEST	0	0	0	0	1	1	no
Glyma01g32430	Glyma01g32430	Glyma01g32430	Gm01:43974483-43977133	ws82-0	ws82-14	OK	0.746962	0.707197	-0.078923	0.127794	0.898312	0.990672	no
Glyma01g32440	Glyma01g32440	Glyma01g32440	Gm01:43989758-43991730	ws82-0	ws82-14	OK	0.297522	1.685	2.50168	-3.51455	0.000440495	0.0127285	yes
Glyma01g32450	Glyma01g32450	Glyma01g32450	Gm01:44035709-44042969	ws82-0	ws82-14	OK	35.3986	32.0733	-0.142321	0.296557	0.766805	0.971596	no
Glyma01g32460	Glyma01g32460	Glyma01g32460	Gm01:44035709-44042969	ws82-0	ws82-14	LOWDATA	0	0	-0.142321	0	1	1	no
Glyma01g32480	Glyma01g32480	Glyma01g32480	Gm01:44085644-44091881	ws82-0	ws82-14	NOTEST	0	0	0	0	1	1	no
Glyma01g32680	Glyma01g32680	Glyma01g32680	Gm01:44207946-44213690	ws82-0	ws82-14	OK	6.6831	2.07538	-1.68714	2.85453	0.00431002	0.0670894	no
Glyma01g32690	Glyma01g32690	Glyma01g32690	Gm01:44229408-44236211	ws82-0	ws82-14	OK	10.3516	6.7365	-0.619782	1.3922	0.163861	0.603819	no
Glyma01g32750	Glyma01g32750	Glyma01g32750	Gm01:44319318-44320867	ws82-0	ws82-14	OK	6004.08	5013.06	-0.26025	0.326271	0.744219	0.968817	no
Glyma01g32760	Glyma01g32760	Glyma01g32760	Gm01:44347887-44349526	ws82-0	ws82-14	NOTEST	0	0	0	0	1	1	no
Glyma01g32775	Glyma01g32775	Glyma01g32775	Gm01:44353224-44356977	ws82-0	ws82-14	NOTEST	0.0296441	0	-1.79769e+308	-1.79769e+308	0.155783	1	no
Glyma01g32790	Glyma01g32790	Glyma01g32790	Gm01:44365503-44368345	ws82-0	ws82-14	OK	3.10801	3.2235	0.0526345	-0.101563	0.919103	0.993185	no
Glyma01g32800	Glyma01g32800	Glyma01g32800	Gm01:44381434-44383734	ws82-0	ws82-14	NOTEST	0.0457295	0.0421513	-0.117549	0.0574801	0.954163	1	no
Glyma01g32810	Glyma01g32810	Glyma01g32810	Gm01:44384412-44392444	ws82-0	ws82-14	OK	0.963713	0.653622	-0.560148	0.959389	0.337363	0.806414	no
Glyma01g32825	Glyma01g32825	Glyma01g32825	Gm01:44418267-44430426	ws82-0	ws82-14	NOTEST	0	0.0631964	1.79769e+308	1.79769e+308	0.082025	1	no
Glyma01g32841	Glyma01g32841	Glyma01g32841	Gm01:44482207-44482737	ws82-0	ws82-14	NOTEST	0	0	0	0	1	1	no
Glyma01g32855	Glyma01g32855	Glyma01g32855	Gm01:44489898-44494310	ws82-0	ws82-14	NOTEST	0.082896	0.160061	0.949245	-0.954452	0.339855	1	no
Glyma01g32870	Glyma01g32870	Glyma01g32870	Gm01:44497093-44498739	ws82-0	ws82-14	OK	33.4137	25.6795	-0.37982	0.838801	0.401581	0.848021	no
Glyma01g32881	Glyma01g32881	Glyma01g32881	Gm01:44501342-44502103	ws82-0	ws82-14	OK	0.828703	0.970995	0.228609	-0.263158	0.792429	0.974423	no
Glyma01g32890	Glyma01g32890	Glyma01g32890	Gm01:44504750-44507253	ws82-0	ws82-14	OK	1.52804	1.23521	-0.306929	0.351701	0.725062	0.965058	no
Glyma01g32900	Glyma01g32900	Glyma01g32900	Gm01:44534734-44540055	ws82-0	ws82-14	NOTEST	0	0	0	0	1	1	no
Glyma01g32920	Glyma01g32920	Glyma01g32920	Gm01:44562541-44564228	ws82-0	ws82-14	NOTEST	0	0.111503	1.79769e+308	1.79769e+308	0.082025	1	no
Glyma01g32940	Glyma01g32940	Glyma01g32940	Gm01:44595567-44597755	ws82-0	ws82-14	NOTEST	0	0	0	0	1	1	no
Glyma01g32961	Glyma01g32961	Glyma01g32961	Gm01:44638341-44639787	ws82-0	ws82-14	NOTEST	0	0	0	0	1	1	no
Glyma01g32981	Glyma01g32981	Glyma01g32981	Gm01:44662613-44664324	ws82-0	ws82-14	NOTEST	0.243485	0.348658	0.51798	-0.607041	0.543824	1	no
Glyma01g33000	Glyma01g33000	Glyma01g33000	Gm01:44707383-44712370	ws82-0	ws82-14	NOTEST	0	0	0	0	1	1	no
Glyma01g33017	Glyma01g33017	Glyma01g33017	Gm01:44713495-44722187	ws82-0	ws82-14	OK	5.54075	5.23095	-0.0830065	0.173513	0.862248	0.984907	no
Glyma01g33034	Glyma01g33034	Glyma01g33034	Gm01:44713495-44722187	ws82-0	ws82-14	OK	0.552358	0.91487	0.727964	-0.450164	0.652592	0.946814	no
Glyma01g33052	Glyma01g33052	Glyma01g33052	Gm01:44724345-44725089	ws82-0	ws82-14	NOTEST	0	0	0	0	1	1	no
Glyma01g33070	Glyma01g33070	Glyma01g33070	Gm01:44755155-44764276	ws82-0	ws82-14	OK	0.652847	1.16567	0.836337	-1.12081	0.262367	0.738168	no
Glyma01g33080	Glyma01g33080	Glyma01g33080	Gm01:44784821-44785786	ws82-0	ws82-14	OK	11.9596	9.99689	-0.25862	0.251452	0.801464	0.976449	no
Glyma01g33097	Glyma01g33097	Glyma01g33097	Gm01:44790872-44791190	ws82-0	ws82-14	OK	2.70467	0.620469	-2.12402	1.29605	0.194959	0.653862	no
Glyma01g33114	Glyma01g33114	Glyma01g33114	Gm01:44806144-44806480	ws82-0	ws82-14	NOTEST	0	0	0	0	1	1	no
Glyma01g33132	Glyma01g33132	Glyma01g33132	Gm01:44822529-44827918	ws82-0	ws82-14	NOTEST	0	0	0	0	1	1	no
Glyma01g33150	Glyma01g33150	Glyma01g33150	Gm01:44831611-44835997	ws82-0	ws82-14	NOTEST	0.25913	0.395314	0.609323	-0.738731	0.460071	1	no
Glyma01g33160	Glyma01g33160	Glyma01g33160	Gm01:44884977-44888493	ws82-0	ws82-14	NOTEST	0	0	0	0	1	1	no
Glyma01g33170	Glyma01g33170	Glyma01g33170	Gm01:44905880-44910333	ws82-0	ws82-14	NOTEST	0	0.280315	1.79769e+308	1.79769e+308	0.0113092	1	no
Glyma01g33181	Glyma01g33181	Glyma01g33181	Gm01:44911452-44912574	ws82-0	ws82-14	NOTEST	0	0	0	0	1	1	no
Glyma01g33191	Glyma01g33191	Glyma01g33191	Gm01:44940045-44941190	ws82-0	ws82-14	NOTEST	0	0	0	0	1	1	no
Glyma01g33200	Glyma01g33200	Glyma01g33200	Gm01:44962980-44967133	ws82-0	ws82-14	OK	14.8178	16.1249	0.121958	-0.273767	0.784264	0.973971	no
Glyma01g33220	Glyma01g33220	Glyma01g33220	Gm01:44980052-44984577	ws82-0	ws82-14	OK	11.0775	9.38331	-0.239467	0.52465	0.599827	0.929944	no
Glyma01g33240	Glyma01g33240	Glyma01g33240	Gm01:45046813-45053379	ws82-0	ws82-14	OK	4.76564	6.82328	0.517797	-1.14397	0.252635	0.727023	no
Glyma01g33270	Glyma01g33270	Glyma01g33270	Gm01:45164206-45167759	ws82-0	ws82-14	OK	6.07042	11.1888	0.882194	-1.97681	0.0480633	0.315839	no
Glyma01g33281	Glyma01g33281	Glyma01g33281	Gm01:45184472-45185139	ws82-0	ws82-14	NOTEST	0	0	0	0	1	1	no
Glyma01g33290	Glyma01g33290	Glyma01g33290	Gm01:45230344-45235073	ws82-0	ws82-14	OK	3.46356	1.96648	-0.81664	1.6421	0.10057	0.479522	no
Glyma01g33300	Glyma01g33300	Glyma01g33300	Gm01:45287112-45288519	ws82-0	ws82-14	NOTEST	0	0	0	0	1	1	no
Glyma01g33313	Glyma01g33313	Glyma01g33313	Gm01:45306250-45306442	ws82-0	ws82-14	NOTEST	0	0	0	0	1	1	no
Glyma01g33326	Glyma01g33326	Glyma01g33326	Gm01:45317460-45320741	ws82-0	ws82-14	NOTEST	0	0	0	0	1	1	no
Glyma01g33340	Glyma01g33340	Glyma01g33340	Gm01:45339891-45344677	ws82-0	ws82-14	NOTEST	0.0425288	0.0810192	0.929824	-0.52748	0.59786	1	no
Glyma01g33350	Glyma01g33350	Glyma01g33350	Gm01:45352146-45354813	ws82-0	ws82-14	NOTEST	0	0	0	0	1	1	no
Glyma01g33370	Glyma01g33370	Glyma01g33370	Gm01:45401644-45404974	ws82-0	ws82-14	NOTEST	0.321052	0.167657	-0.937291	0.954059	0.340054	1	no
Glyma01g33380	Glyma01g33380	Glyma01g33380	Gm01:45433046-45455133	ws82-0	ws82-14	OK	2.73998	3.36214	0.295215	-0.43361	0.664571	0.949333	no
Glyma01g33420	Glyma01g33420	Glyma01g33420	Gm01:45530801-45532165	ws82-0	ws82-14	OK	0.637091	0.768387	0.270333	-0.357159	0.720973	0.964414	no
Glyma01g33430	Glyma01g33430	Glyma01g33430	Gm01:45548731-45551079	ws82-0	ws82-14	NOTEST	0	0.0488215	1.79769e+308	1.79769e+308	0.162559	1	no
Glyma01g33440	Glyma01g33440	Glyma01g33440	Gm01:45561036-45565329	ws82-0	ws82-14	OK	0.486239	0.442602	-0.135656	0.181247	0.856174	0.984556	no
Glyma01g33461	Glyma01g33461	Glyma01g33461	Gm01:45637083-45640786	ws82-0	ws82-14	NOTEST	0	0.0122885	1.79769e+308	1.79769e+308	0.24328	1	no
Glyma01g33480	Glyma01g33480	Glyma01g33480	Gm01:45640951-45643255	ws82-0	ws82-14	NOTEST	0	0.0135813	1.79769e+308	1.79769e+308	0.24328	1	no
Glyma01g33500	Glyma01g33500	Glyma01g33500	Gm01:45666010-45668198	ws82-0	ws82-14	NOTEST	0	0.0143449	1.79769e+308	1.79769e+308	0.24328	1	no
Glyma01g33510	Glyma01g33510	Glyma01g33510	Gm01:45669204-45672362	ws82-0	ws82-14	NOTEST	0	0.0173134	1.79769e+308	1.79769e+308	0.24328	1	no
Glyma01g33520	Glyma01g33520	Glyma01g33520	Gm01:45685075-45692774	ws82-0	ws82-14	OK	7.64886	7.00291	-0.127291	0.263794	0.791939	0.974423	no
Glyma01g33560	Glyma01g33560	Glyma01g33560	Gm01:45743456-45744317	ws82-0	ws82-14	NOTEST	0	0	0	0	1	1	no
Glyma01g33575	Glyma01g33575	Glyma01g33575	Gm01:45782142-45782607	ws82-0	ws82-14	NOTEST	0	0	0	0	1	1	no
Glyma01g33590	Glyma01g33590	Glyma01g33590	Gm01:45785878-45786501	ws82-0	ws82-14	NOTEST	0	0	0	0	1	1	no
Glyma01g33600	Glyma01g33600	Glyma01g33600	Gm01:45786844-45790318	ws82-0	ws82-14	OK	6.37753	6.71904	0.0752571	-0.144868	0.884815	0.988365	no
Glyma01g33610	Glyma01g33610	Glyma01g33610	Gm01:45796676-45800002	ws82-0	ws82-14	OK	4.82942	6.0479	0.324584	-0.672634	0.50118	0.893638	no
Glyma01g33620	Glyma01g33620	Glyma01g33620	Gm01:45803536-45806513	ws82-0	ws82-14	OK	1.24456	1.95259	0.649749	-1.01065	0.312185	0.784156	no
Glyma01g33635	Glyma01g33635	Glyma01g33635	Gm01:45827324-45830713	ws82-0	ws82-14	NOTEST	0	0	0	0	1	1	no
Glyma01g33650	Glyma01g33650	Glyma01g33650	Gm01:45852397-45854700	ws82-0	ws82-14	OK	2.6168	4.70795	0.847296	-1.76073	0.0782836	0.418126	no
Glyma01g33660	Glyma01g33660	Glyma01g33660	Gm01:45858147-45867014	ws82-0	ws82-14	OK	10.0615	11.1707	0.150867	-0.339878	0.733948	0.966812	no
Glyma01g33676	Glyma01g33676	Glyma01g33676	Gm01:45892351-45898318	ws82-0	ws82-14	OK	0.653989	1.30814	1.00018	-1.5774	0.114704	0.513237	no
Glyma01g33692	Glyma01g33692	Glyma01g33692	Gm01:45905544-45906417	ws82-0	ws82-14	NOTEST	0	0	0	0	1	1	no
Glyma01g33708	Glyma01g33708	Glyma01g33708	Gm01:45911622-45912362	ws82-0	ws82-14	NOTEST	0	0	0	0	1	1	no
Glyma01g33724	Glyma01g33724	Glyma01g33724	Gm01:45932771-45933893	ws82-0	ws82-14	OK	2.44155	2.91267	0.254549	-0.443616	0.65732	0.946948	no
Glyma01g33740	Glyma01g33740	Glyma01g33740	Gm01:45948913-45964890	ws82-0	ws82-14	NOTEST	0	0	0	0	1	1	no
Glyma01g33761	Glyma01g33761	Glyma01g33761	Gm01:45948913-45964890	ws82-0	ws82-14	OK	3.42037	3.74	0.128886	-0.242206	0.808621	0.978109	no
Glyma01g33782	Glyma01g33782	Glyma01g33782	Gm01:45948913-45964890	ws82-0	ws82-14	NOTEST	0	0	0	0	1	1	no
Glyma01g33803	Glyma01g33803	Glyma01g33803	Gm01:45990835-45994797	ws82-0	ws82-14	NOTEST	0.0255308	0	-1.79769e+308	-1.79769e+308	0.237134	1	no
Glyma01g33824	Glyma01g33824	Glyma01g33824	Gm01:46002247-46005198	ws82-0	ws82-14	NOTEST	0	0	0	0	1	1	no
Glyma01g33845	Glyma01g33845	Glyma01g33845	Gm01:46007636-46011913	ws82-0	ws82-14	NOTEST	0	0	0	0	1	1	no
Glyma01g33866	Glyma01g33866	Glyma01g33866	Gm01:46043835-46074615	ws82-0	ws82-14	OK	5.12935	4.41847	-0.215228	0.466034	0.641191	0.943595	no
Glyma01g33888	Glyma01g33888	Glyma01g33888	Gm01:46096266-46097858	ws82-0	ws82-14	NOTEST	0	0	0	0	1	1	no
Glyma01g33910	Glyma01g33910	Glyma01g33910	Gm01:46103382-46104985	ws82-0	ws82-14	NOTEST	0.0493487	0.228026	2.20812	-1.38881	0.164891	1	no
Glyma01g33920	Glyma01g33920	Glyma01g33920	Gm01:46115248-46117119	ws82-0	ws82-14	NOTEST	0	0	0	0	1	1	no
Glyma01g33960	Glyma01g33960	Glyma01g33960	Gm01:46237540-46239330	ws82-0	ws82-14	NOTEST	0	0	0	0	1	1	no
Glyma01g33986	Glyma01g33986	Glyma01g33986	Gm01:46305207-46307924	ws82-0	ws82-14	NOTEST	0	0	0	0	1	1	no
Glyma01g34013	Glyma01g34013	Glyma01g34013	Gm01:46321601-46322033	ws82-0	ws82-14	NOTEST	0	0	0	0	1	1	no
Glyma01g34040	Glyma01g34040	Glyma01g34040	Gm01:46325425-46325842	ws82-0	ws82-14	NOTEST	0	0	0	0	1	1	no
Glyma01g34060	Glyma01g34060	Glyma01g34060	Gm01:46360579-46360996	ws82-0	ws82-14	NOTEST	0	0	0	0	1	1	no
Glyma01g34111	Glyma01g34111	Glyma01g34111	Gm01:46405622-46406054	ws82-0	ws82-14	NOTEST	0	0	0	0	1	1	no
Glyma01g34160	Glyma01g34160	Glyma01g34160	Gm01:46426795-46427518	ws82-0	ws82-14	NOTEST	0	0	0	0	1	1	no
Glyma01g34180	Glyma01g34180	Glyma01g34180	Gm01:46434724-46435093	ws82-0	ws82-14	NOTEST	0	0	0	0	1	1	no
Glyma01g34210	Glyma01g34210	Glyma01g34210	Gm01:46467747-46468471	ws82-0	ws82-14	NOTEST	0	0	0	0	1	1	no
Glyma01g34223	Glyma01g34223	Glyma01g34223	Gm01:46519589-46520799	ws82-0	ws82-14	NOTEST	0	0	0	0	1	1	no
Glyma01g34236	Glyma01g34236	Glyma01g34236	Gm01:46527137-46531737	ws82-0	ws82-14	OK	1.65185	0.969665	-0.768523	1.11954	0.262909	0.738317	no
Glyma01g34250	Glyma01g34250	Glyma01g34250	Gm01:46534521-46534953	ws82-0	ws82-14	NOTEST	0	0	0	0	1	1	no
Glyma01g34260	Glyma01g34260	Glyma01g34260	Gm01:46537220-46537655	ws82-0	ws82-14	NOTEST	0	0	0	0	1	1	no
Glyma01g34270	Glyma01g34270	Glyma01g34270	Gm01:46573515-46583536	ws82-0	ws82-14	OK	7.73311	8.50756	0.137697	-0.297646	0.765973	0.971596	no
Glyma01g34300	Glyma01g34300	Glyma01g34300	Gm01:46676161-46677711	ws82-0	ws82-14	OK	489.453	111.821	-2.12998	3.93007	8.49199e-05	0.00360678	yes
Glyma01g34321	Glyma01g34321	Glyma01g34321	Gm01:46693841-46694273	ws82-0	ws82-14	NOTEST	0	0	0	0	1	1	no
Glyma01g34340	Glyma01g34340	Glyma01g34340	Gm01:46707889-46726051	ws82-0	ws82-14	NOTEST	0	0	0	0	1	1	no
Glyma01g34350	Glyma01g34350	Glyma01g34350	Gm01:46731685-46740931	ws82-0	ws82-14	OK	3.99995	2.55831	-0.64479	1.30829	0.190775	0.647279	no
Glyma01g34360	Glyma01g34360	Glyma01g34360	Gm01:46742637-46747004	ws82-0	ws82-14	OK	1.30556	0.582246	-1.16497	1.26301	0.206585	0.67033	no
Glyma01g34370	Glyma01g34370	Glyma01g34370	Gm01:46749398-46751642	ws82-0	ws82-14	NOTEST	0.106992	0.190854	0.834967	-0.473669	0.635736	1	no
Glyma01g34380	Glyma01g34380	Glyma01g34380	Gm01:46754477-46758976	ws82-0	ws82-14	OK	3.59823	1.88542	-0.932401	1.51007	0.131025	0.547797	no
Glyma01g34400	Glyma01g34400	Glyma01g34400	Gm01:46763231-46763483	ws82-0	ws82-14	OK	4.62567	3.12092	-0.56769	0.428849	0.668033	0.950141	no
Glyma01g34410	Glyma01g34410	Glyma01g34410	Gm01:46764767-46772182	ws82-0	ws82-14	OK	4.45213	6.56593	0.560504	-1.11206	0.266114	0.741186	no
Glyma01g34420	Glyma01g34420	Glyma01g34420	Gm01:46787052-46789561	ws82-0	ws82-14	NOTEST	0	0.0809062	1.79769e+308	1.79769e+308	0.082025	1	no
Glyma01g34443	Glyma01g34443	Glyma01g34443	Gm01:46808690-46811728	ws82-0	ws82-14	NOTEST	0	0	0	0	1	1	no
Glyma01g34466	Glyma01g34466	Glyma01g34466	Gm01:46825911-46827713	ws82-0	ws82-14	NOTEST	0	0	0	0	1	1	no
Glyma01g34490	Glyma01g34490	Glyma01g34490	Gm01:46835873-46838757	ws82-0	ws82-14	NOTEST	0	0	0	0	1	1	no
Glyma01g34506	Glyma01g34506	Glyma01g34506	Gm01:46869789-46881811	ws82-0	ws82-14	OK	2.05724	1.50168	-0.454131	0.866177	0.386393	0.839029	no
Glyma01g34523	Glyma01g34523	Glyma01g34523	Gm01:46869789-46881811	ws82-0	ws82-14	NOTEST	0	0	0	0	1	1	no
Glyma01g34540	Glyma01g34540	Glyma01g34540	Gm01:46906412-46911701	ws82-0	ws82-14	NOTEST	0.0763436	0.0694886	-0.135732	0.0938633	0.925218	1	no
Glyma01g34560	Glyma01g34560	Glyma01g34560	Gm01:46925228-46938022	ws82-0	ws82-14	OK	2.20086	1.86055	-0.242333	0.463878	0.642735	0.944465	no
Glyma01g34570	Glyma01g34570	Glyma01g34570	Gm01:46940993-46942519	ws82-0	ws82-14	NOTEST	0.250829	0.299374	0.255245	-0.277777	0.781184	1	no
Glyma01g34580	Glyma01g34580	Glyma01g34580	Gm01:46987337-46989392	ws82-0	ws82-14	NOTEST	0	0	0	0	1	1	no
Glyma01g34590	Glyma01g34590	Glyma01g34590	Gm01:46994947-47011742	ws82-0	ws82-14	NOTEST	0.0753512	0.0965209	0.35721	-0.375002	0.707659	1	no
Glyma01g34605	Glyma01g34605	Glyma01g34605	Gm01:47017352-47017572	ws82-0	ws82-14	NOTEST	0	0	0	0	1	1	no
Glyma01g34620	Glyma01g34620	Glyma01g34620	Gm01:47044532-47046263	ws82-0	ws82-14	OK	0.13315	0.517506	1.95852	-1.65715	0.09749	0.470253	no
Glyma01g34630	Glyma01g34630	Glyma01g34630	Gm01:47059946-47069275	ws82-0	ws82-14	OK	11.0752	12.5911	0.185079	-0.397125	0.691276	0.956855	no
Glyma01g34650	Glyma01g34650	Glyma01g34650	Gm01:47081810-47085604	ws82-0	ws82-14	NOTEST	0.15261	0.177051	0.214315	-0.185979	0.852461	1	no
Glyma01g34660	Glyma01g34660	Glyma01g34660	Gm01:47090148-47094163	ws82-0	ws82-14	OK	11.5984	12.866	0.149638	-0.307194	0.758696	0.970728	no
Glyma01g34671	Glyma01g34671	Glyma01g34671	Gm01:47112164-47117514	ws82-0	ws82-14	NOTEST	0	0	0	0	1	1	no
Glyma01g34680	Glyma01g34680	Glyma01g34680	Gm01:47129774-47133165	ws82-0	ws82-14	OK	16.9093	7.2091	-1.22992	2.508	0.0121416	0.134511	no
Glyma01g34690	Glyma01g34690	Glyma01g34690	Gm01:47136977-47141477	ws82-0	ws82-14	OK	5.42403	4.27378	-0.34385	0.506196	0.612719	0.934625	no
Glyma01g34700	Glyma01g34700	Glyma01g34700	Gm01:47141945-47148729	ws82-0	ws82-14	OK	40.4726	36.2349	-0.159565	0.32178	0.74762	0.969061	no
Glyma01g34710	Glyma01g34710	Glyma01g34710	Gm01:47159471-47160816	ws82-0	ws82-14	NOTEST	0	0	0	0	1	1	no
Glyma01g34723	Glyma01g34723	Glyma01g34723	Gm01:47186498-47195065	ws82-0	ws82-14	NOTEST	0.199002	0.240566	0.27365	-0.150288	0.880537	1	no
Glyma01g34736	Glyma01g34736	Glyma01g34736	Gm01:47186498-47195065	ws82-0	ws82-14	OK	1.07823	0.442281	-1.28563	1.5036	0.132684	0.550604	no
Glyma01g34750	Glyma01g34750	Glyma01g34750	Gm01:47186498-47195065	ws82-0	ws82-14	NOTEST	0	0	0	0	1	1	no
Glyma01g34760	Glyma01g34760	Glyma01g34760	Gm01:47218316-47222203	ws82-0	ws82-14	NOTEST	0	0	0	0	1	1	no
Glyma01g34770	Glyma01g34770	Glyma01g34770	Gm01:47223841-47226695	ws82-0	ws82-14	NOTEST	0	0	0	0	1	1	no
Glyma01g34780	Glyma01g34780	Glyma01g34780	Gm01:47252139-47259720	ws82-0	ws82-14	OK	10.7266	11.0283	0.0400272	-0.0844222	0.932721	0.995066	no
Glyma01g34791	Glyma01g34791	Glyma01g34791	Gm01:47272202-47272649	ws82-0	ws82-14	NOTEST	0	0	0	0	1	1	no
Glyma01g34800	Glyma01g34800	Glyma01g34800	Gm01:47276056-47279637	ws82-0	ws82-14	OK	0.223802	0.59713	1.41582	-1.59152	0.111493	0.507412	no
Glyma01g34820	Glyma01g34820	Glyma01g34820	Gm01:47295116-47298579	ws82-0	ws82-14	OK	9.34272	10.9064	0.223262	-0.503046	0.614932	0.935122	no
Glyma01g34830	Glyma01g34830	Glyma01g34830	Gm01:47301280-47303164	ws82-0	ws82-14	NOTEST	0.0296635	0.0531551	0.841521	-0.477386	0.633087	1	no
Glyma01g34840	Glyma01g34840	Glyma01g34840	Gm01:47306519-47315257	ws82-0	ws82-14	OK	4.58547	5.92808	0.370494	-0.833219	0.404721	0.849715	no
Glyma01g34890	Glyma01g34890	Glyma01g34890	Gm01:47380345-47383987	ws82-0	ws82-14	NOTEST	0	0	0	0	1	1	no
Glyma01g34930	Glyma01g34930	Glyma01g34930	Gm01:47416768-47417287	ws82-0	ws82-14	OK	0.0661182	0.955385	3.85296	-1.82096	0.0686129	0.390459	no
Glyma01g34940	Glyma01g34940	Glyma01g34940	Gm01:47418176-47422790	ws82-0	ws82-14	OK	3.86465	4.33276	0.164951	-0.319069	0.749674	0.969309	no
Glyma01g34950	Glyma01g34950	Glyma01g34950	Gm01:47484620-47488243	ws82-0	ws82-14	NOTEST	0	0	0	0	1	1	no
Glyma01g34960	Glyma01g34960	Glyma01g34960	Gm01:47484620-47488243	ws82-0	ws82-14	OK	1.32769	1.06286	-0.320962	0.475437	0.634476	0.941551	no
Glyma01g34971	Glyma01g34971	Glyma01g34971	Gm01:47509796-47513893	ws82-0	ws82-14	NOTEST	0	0	0	0	1	1	no
Glyma01g34980	Glyma01g34980	Glyma01g34980	Gm01:47515002-47518685	ws82-0	ws82-14	OK	0.332769	0.766174	1.20315	-1.73366	0.0829784	0.430369	no
Glyma01g34990	Glyma01g34990	Glyma01g34990	Gm01:47519487-47522901	ws82-0	ws82-14	OK	0.27087	1.03486	1.93376	-2.32991	0.0198108	0.184503	no
Glyma01g35010	Glyma01g35010	Glyma01g35010	Gm01:47557393-47559050	ws82-0	ws82-14	OK	0.601843	0.921001	0.613815	-0.858012	0.390886	0.841989	no
Glyma01g35030	Glyma01g35030	Glyma01g35030	Gm01:47605850-47609703	ws82-0	ws82-14	OK	29.14	25.4558	-0.195005	0.436011	0.662829	0.948797	no
Glyma01g35043	Glyma01g35043	Glyma01g35043	Gm01:47610784-47630469	ws82-0	ws82-14	OK	4.35281	3.74954	-0.215232	0.422014	0.673015	0.951081	no
Glyma01g35056	Glyma01g35056	Glyma01g35056	Gm01:47635648-47638176	ws82-0	ws82-14	OK	0.639295	0.421527	-0.600859	0.802798	0.422092	0.860229	no
Glyma01g35070	Glyma01g35070	Glyma01g35070	Gm01:47640057-47641838	ws82-0	ws82-14	NOTEST	0	0.234583	1.79769e+308	1.79769e+308	0.082025	1	no
Glyma01g35083	Glyma01g35083	Glyma01g35083	Gm01:47647068-47659579	ws82-0	ws82-14	OK	2.40497	2.55607	0.0879118	-0.167834	0.866714	0.986001	no
Glyma01g35096	Glyma01g35096	Glyma01g35096	Gm01:47647068-47659579	ws82-0	ws82-14	NOTEST	0.313841	0.381528	0.281755	-0.190653	0.848797	1	no
Glyma01g35110	Glyma01g35110	Glyma01g35110	Gm01:47674344-47678727	ws82-0	ws82-14	OK	4.41782	2.82105	-0.647099	1.16061	0.245802	0.719539	no
Glyma01g35120	Glyma01g35120	Glyma01g35120	Gm01:47680344-47682544	ws82-0	ws82-14	NOTEST	0	0	0	0	1	1	no
Glyma01g35130	Glyma01g35130	Glyma01g35130	Gm01:47684337-47693236	ws82-0	ws82-14	OK	25.8839	31.1102	0.265336	-0.597594	0.550111	0.915191	no
Glyma01g35145	Glyma01g35145	Glyma01g35145	Gm01:47696213-47700220	ws82-0	ws82-14	OK	1.98944	2.21669	0.156044	-0.275213	0.783152	0.973847	no
Glyma01g35160	Glyma01g35160	Glyma01g35160	Gm01:47703725-47705225	ws82-0	ws82-14	OK	0.260469	0.840411	1.68998	-2.00244	0.045237	0.304718	no
Glyma01g35170	Glyma01g35170	Glyma01g35170	Gm01:47707392-47708756	ws82-0	ws82-14	OK	11.0469	11.192	0.0188238	-0.0404047	0.967771	0.997668	no
Glyma01g35180	Glyma01g35180	Glyma01g35180	Gm01:47718336-47725678	ws82-0	ws82-14	NOTEST	0.0935509	0.10942	0.22605	-0.194169	0.846044	1	no
Glyma01g35190	Glyma01g35190	Glyma01g35190	Gm01:47727548-47732948	ws82-0	ws82-14	OK	40.6701	34.597	-0.233321	0.505399	0.613279	0.934773	no
Glyma01g35201	Glyma01g35201	Glyma01g35201	Gm01:47733363-47734311	ws82-0	ws82-14	OK	2.58537	1.81963	-0.506721	0.452731	0.650742	0.945945	no
Glyma01g35211	Glyma01g35211	Glyma01g35211	Gm01:47738908-47740460	ws82-0	ws82-14	NOTEST	0	0	0	0	1	1	no
Glyma01g35220	Glyma01g35220	Glyma01g35220	Gm01:47744055-47749293	ws82-0	ws82-14	OK	22.2439	56.084	1.33418	-2.52204	0.0116677	0.130948	no
Glyma01g35230	Glyma01g35230	Glyma01g35230	Gm01:47776150-47780905	ws82-0	ws82-14	OK	13.8778	9.30368	-0.576907	1.26984	0.204143	0.66622	no
Glyma01g35255	Glyma01g35255	Glyma01g35255	Gm01:47796276-47802389	ws82-0	ws82-14	NOTEST	0.0425703	0.152864	1.84433	-1.54952	0.121256	1	no
Glyma01g35280	Glyma01g35280	Glyma01g35280	Gm01:47816224-47821828	ws82-0	ws82-14	OK	24.63	24.8722	0.0141126	-0.0317877	0.974641	0.997956	no
Glyma01g35291	Glyma01g35291	Glyma01g35291	Gm01:47825541-47831516	ws82-0	ws82-14	OK	0.881528	0.918545	0.0593439	-0.0799943	0.936242	0.995582	no
Glyma01g35300	Glyma01g35300	Glyma01g35300	Gm01:47832148-47834125	ws82-0	ws82-14	OK	5.05847	5.33579	0.0770009	-0.153843	0.877733	0.987639	no
Glyma01g35310	Glyma01g35310	Glyma01g35310	Gm01:47838176-47839418	ws82-0	ws82-14	NOTEST	0.0809028	0.119081	0.557682	-0.423654	0.671818	1	no
Glyma01g35315	Glyma01g35315	Glyma01g35315	Gm01:47840273-47842107	ws82-0	ws82-14	NOTEST	0	0	0	0	1	1	no
Glyma01g35320	Glyma01g35320	Glyma01g35320	Gm01:47843480-47846444	ws82-0	ws82-14	OK	14.9797	18.5983	0.312158	-0.701737	0.482843	0.888921	no
Glyma01g35330	Glyma01g35330	Glyma01g35330	Gm01:47852135-47854503	ws82-0	ws82-14	OK	5.2073	4.33904	-0.263159	0.56533	0.571849	0.921129	no
Glyma01g35360	Glyma01g35360	Glyma01g35360	Gm01:47868564-47871498	ws82-0	ws82-14	OK	21.8078	16.6521	-0.389145	0.876453	0.380784	0.835131	no
Glyma01g35370	Glyma01g35370	Glyma01g35370	Gm01:47876579-47879048	ws82-0	ws82-14	OK	3.52464	5.11725	0.537893	-1.11249	0.265925	0.741038	no
Glyma01g35381	Glyma01g35381	Glyma01g35381	Gm01:47882778-47885490	ws82-0	ws82-14	OK	16.9506	13.9553	-0.280518	0.585138	0.558455	0.918302	no
Glyma01g35390	Glyma01g35390	Glyma01g35390	Gm01:47891482-47901268	ws82-0	ws82-14	OK	11.9702	16.5912	0.470967	-1.05507	0.291394	0.766672	no
Glyma01g35400	Glyma01g35400	Glyma01g35400	Gm01:47904409-47909019	ws82-0	ws82-14	OK	2.03665	2.2347	0.13388	-0.237095	0.812583	0.978544	no
Glyma01g35410	Glyma01g35410	Glyma01g35410	Gm01:47910023-47911708	ws82-0	ws82-14	NOTEST	0.064143	0.180485	1.49252	-1.23034	0.218571	1	no
Glyma01g35420	Glyma01g35420	Glyma01g35420	Gm01:47912898-47913228	ws82-0	ws82-14	NOTEST	0	0	0	0	1	1	no
Glyma01g35430	Glyma01g35430	Glyma01g35430	Gm01:47926149-47931104	ws82-0	ws82-14	NOTEST	0.0298764	0.0278065	-0.10358	0.0506494	0.959605	1	no
Glyma01g35440	Glyma01g35440	Glyma01g35440	Gm01:47932186-47933647	ws82-0	ws82-14	NOTEST	0	0	0	0	1	1	no
Glyma01g35450	Glyma01g35450	Glyma01g35450	Gm01:47933912-47939040	ws82-0	ws82-14	OK	10.2562	5.68749	-0.850627	1.87074	0.0613815	0.366385	no
Glyma01g35460	Glyma01g35460	Glyma01g35460	Gm01:47946562-47947368	ws82-0	ws82-14	OK	17.9878	12.4626	-0.529408	1.11519	0.264769	0.740054	no
Glyma01g35470	Glyma01g35470	Glyma01g35470	Gm01:47950106-47953985	ws82-0	ws82-14	OK	1.19175	0.971567	-0.294693	0.393542	0.693919	0.95759	no
Glyma01g35480	Glyma01g35480	Glyma01g35480	Gm01:47964085-47972060	ws82-0	ws82-14	OK	9.21893	10.7013	0.215113	-0.397728	0.690831	0.956563	no
Glyma01g35490	Glyma01g35490	Glyma01g35490	Gm01:47975124-47980649	ws82-0	ws82-14	OK	3.57592	3.21368	-0.154088	0.325958	0.744456	0.968817	no
Glyma01g35500	Glyma01g35500	Glyma01g35500	Gm01:47984869-47990016	ws82-0	ws82-14	OK	0.772956	0.298954	-1.37046	1.8414	0.0655623	0.380919	no
Glyma01g35510	Glyma01g35510	Glyma01g35510	Gm01:47990548-47991258	ws82-0	ws82-14	OK	1.52528	0.737107	-1.04913	1.1752	0.239914	0.713172	no
Glyma01g35530	Glyma01g35530	Glyma01g35530	Gm01:48002890-48006714	ws82-0	ws82-14	OK	0.616745	0.333831	-0.885556	1.11847	0.263367	0.738756	no
Glyma01g35540	Glyma01g35540	Glyma01g35540	Gm01:48012025-48020478	ws82-0	ws82-14	OK	2.09716	3.65857	0.802848	-1.38482	0.166108	0.60715	no
Glyma01g35551	Glyma01g35551	Glyma01g35551	Gm01:48045791-48046532	ws82-0	ws82-14	OK	0.529029	0.242738	-1.12395	0.88552	0.375876	0.832612	no
Glyma01g35561	Glyma01g35561	Glyma01g35561	Gm01:48046627-48048949	ws82-0	ws82-14	NOTEST	0.0321258	0.16447	2.35602	-1.49371	0.135252	1	no
Glyma01g35570	Glyma01g35570	Glyma01g35570	Gm01:48069521-48070621	ws82-0	ws82-14	OK	3.61403	1.44768	-1.31986	1.89251	0.0584236	0.35508	no
Glyma01g35580	Glyma01g35580	Glyma01g35580	Gm01:48077865-48083725	ws82-0	ws82-14	OK	2.02698	0.351392	-2.52818	3.18087	0.00146833	0.0314064	yes
Glyma01g35590	Glyma01g35590	Glyma01g35590	Gm01:48086193-48086883	ws82-0	ws82-14	OK	0.254744	0.590318	1.21244	-1.15483	0.248162	0.722079	no
Glyma01g35600	Glyma01g35600	Glyma01g35600	Gm01:48088646-48092573	ws82-0	ws82-14	OK	4.39544	7.14133	0.700186	-1.36939	0.170877	0.614917	no
Glyma01g35611	Glyma01g35611	Glyma01g35611	Gm01:48106435-48107149	ws82-0	ws82-14	NOTEST	0	0	0	0	1	1	no
Glyma01g35620	Glyma01g35620	Glyma01g35620	Gm01:48132072-48139955	ws82-0	ws82-14	OK	41.7243	17.8029	-1.22878	2.64087	0.00826945	0.105068	no
Glyma01g35630	Glyma01g35630	Glyma01g35630	Gm01:48142117-48144321	ws82-0	ws82-14	OK	1.0639	0.592013	-0.845657	1.12639	0.259998	0.736176	no
Glyma01g35640	Glyma01g35640	Glyma01g35640	Gm01:48145384-48152470	ws82-0	ws82-14	OK	2.05384	0.928293	-1.14568	1.94114	0.0522416	0.331528	no
Glyma01g35650	Glyma01g35650	Glyma01g35650	Gm01:48157272-48165868	ws82-0	ws82-14	OK	14.4473	2.79243	-2.37121	5.14625	2.65751e-07	3.17194e-05	yes
Glyma01g35660	Glyma01g35660	Glyma01g35660	Gm01:48174704-48177832	ws82-0	ws82-14	OK	2.39369	1.92714	-0.312773	0.56767	0.570259	0.92075	no
Glyma01g35671	Glyma01g35671	Glyma01g35671	Gm01:48220843-48221643	ws82-0	ws82-14	OK	19.4731	20.4691	0.0719689	-0.147937	0.882392	0.988047	no
Glyma01g35681	Glyma01g35681	Glyma01g35681	Gm01:48221730-48222524	ws82-0	ws82-14	NOTEST	0	0.249141	1.79769e+308	1.79769e+308	0.082025	1	no
Glyma01g35690	Glyma01g35690	Glyma01g35690	Gm01:48227988-48235632	ws82-0	ws82-14	OK	1.14705	1.06026	-0.113513	0.182976	0.854817	0.984398	no
Glyma01g35700	Glyma01g35700	Glyma01g35700	Gm01:48235761-48238962	ws82-0	ws82-14	NOTEST	0.0184671	0.065425	1.82489	-1.13539	0.256214	1	no
Glyma01g35711	Glyma01g35711	Glyma01g35711	Gm01:48242478-48244212	ws82-0	ws82-14	NOTEST	0	0	0	0	1	1	no
Glyma01g35720	Glyma01g35720	Glyma01g35720	Gm01:48246126-48248948	ws82-0	ws82-14	NOTEST	0	0	0	0	1	1	no
Glyma01g35730	Glyma01g35730	Glyma01g35730	Gm01:48251598-48253821	ws82-0	ws82-14	OK	0.757137	0.809018	0.0956173	-0.120644	0.903973	0.991664	no
Glyma01g35740	Glyma01g35740	Glyma01g35740	Gm01:48256233-48258418	ws82-0	ws82-14	OK	0.601599	1.52485	1.34179	-1.76002	0.078405	0.418361	no
Glyma01g35750	Glyma01g35750	Glyma01g35750	Gm01:48262136-48265375	ws82-0	ws82-14	OK	13.0833	14.8905	0.186667	-0.419803	0.67463	0.951624	no
Glyma01g35780	Glyma01g35780	Glyma01g35780	Gm01:48276784-48278711	ws82-0	ws82-14	OK	13.3414	11.9849	-0.15469	0.316492	0.751629	0.969485	no
Glyma01g35790	Glyma01g35790	Glyma01g35790	Gm01:48279936-48284217	ws82-0	ws82-14	OK	9.95281	6.10847	-0.704294	1.57986	0.114138	0.512098	no
Glyma01g35800	Glyma01g35800	Glyma01g35800	Gm01:48289113-48292398	ws82-0	ws82-14	OK	1.62097	1.50427	-0.107788	0.195862	0.844718	0.982949	no
Glyma01g35820	Glyma01g35820	Glyma01g35820	Gm01:48321786-48329293	ws82-0	ws82-14	OK	1.28111	1.42508	0.153651	-0.269233	0.787751	0.974169	no
Glyma01g35830	Glyma01g35830	Glyma01g35830	Gm01:48330613-48331119	ws82-0	ws82-14	NOTEST	0	0	0	0	1	1	no
Glyma01g35840	Glyma01g35840	Glyma01g35840	Gm01:48332060-48333217	ws82-0	ws82-14	OK	5.9001	2.76628	-1.09279	1.86853	0.0616877	0.367541	no
Glyma01g35850	Glyma01g35850	Glyma01g35850	Gm01:48334976-48338851	ws82-0	ws82-14	OK	4.89233	3.47256	-0.494521	1.07923	0.280487	0.754679	no
Glyma01g35880	Glyma01g35880	Glyma01g35880	Gm01:48348796-48349428	ws82-0	ws82-14	NOTEST	0	0	0	0	1	1	no
Glyma01g35910	Glyma01g35910	Glyma01g35910	Gm01:48361827-48364787	ws82-0	ws82-14	OK	734.924	364.792	-1.01052	1.51395	0.130039	0.545581	no
Glyma01g35920	Glyma01g35920	Glyma01g35920	Gm01:48373909-48375181	ws82-0	ws82-14	OK	1.55498	1.3685	-0.1843	0.270947	0.786432	0.974049	no
Glyma01g35931	Glyma01g35931	Glyma01g35931	Gm01:48376295-48378301	ws82-0	ws82-14	NOTEST	0	0	0	0	1	1	no
Glyma01g35940	Glyma01g35940	Glyma01g35940	Gm01:48378830-48383355	ws82-0	ws82-14	OK	4.90712	3.61846	-0.439501	0.945114	0.344601	0.811487	no
Glyma01g35950	Glyma01g35950	Glyma01g35950	Gm01:48392038-48401536	ws82-0	ws82-14	OK	2.18419	2.03387	-0.102867	0.215394	0.82946	0.980675	no
Glyma01g35960	Glyma01g35960	Glyma01g35960	Gm01:48412616-48415065	ws82-0	ws82-14	NOTEST	0	0.0402364	1.79769e+308	1.79769e+308	0.162559	1	no
Glyma01g35970	Glyma01g35970	Glyma01g35970	Gm01:48419129-48422033	ws82-0	ws82-14	NOTEST	0	0	0	0	1	1	no
Glyma01g35980	Glyma01g35980	Glyma01g35980	Gm01:48422961-48427391	ws82-0	ws82-14	OK	1.8417	2.28206	0.3093	-0.60735	0.543619	0.911638	no
Glyma01g35990	Glyma01g35990	Glyma01g35990	Gm01:48439916-48441659	ws82-0	ws82-14	OK	4.59361	3.48525	-0.398367	0.742645	0.457697	0.878382	no
Glyma01g36000	Glyma01g36000	Glyma01g36000	Gm01:48442886-48447854	ws82-0	ws82-14	OK	1.31895	2.84451	1.10879	-2.12752	0.033377	0.255585	no
Glyma01g36011	Glyma01g36011	Glyma01g36011	Gm01:48469240-48475758	ws82-0	ws82-14	OK	3.36614	3.3959	0.0126972	-0.0241896	0.980701	0.998584	no
Glyma01g36021	Glyma01g36021	Glyma01g36021	Gm01:48476497-48478317	ws82-0	ws82-14	NOTEST	0	0	0	0	1	1	no
Glyma01g36030	Glyma01g36030	Glyma01g36030	Gm01:48481465-48486456	ws82-0	ws82-14	OK	4.66713	11.735	1.33022	-2.45738	0.0139955	0.14741	no
Glyma01g36040	Glyma01g36040	Glyma01g36040	Gm01:48503695-48509106	ws82-0	ws82-14	OK	2.86141	2.76645	-0.0486908	0.0964871	0.923134	0.993669	no
Glyma01g36050	Glyma01g36050	Glyma01g36050	Gm01:48515192-48516090	ws82-0	ws82-14	NOTEST	0.155408	0.204683	0.397326	-0.301837	0.762777	1	no
Glyma01g36070	Glyma01g36070	Glyma01g36070	Gm01:48524087-48529043	ws82-0	ws82-14	OK	12.747	11.7624	-0.115978	0.261317	0.793848	0.974806	no
Glyma01g36080	Glyma01g36080	Glyma01g36080	Gm01:48537766-48542585	ws82-0	ws82-14	OK	4.05716	2.85938	-0.504769	1.04155	0.297619	0.772487	no
Glyma01g36091	Glyma01g36091	Glyma01g36091	Gm01:48559460-48570512	ws82-0	ws82-14	NOTEST	0.187852	0.134081	-0.486497	0.478563	0.632249	1	no
Glyma01g36101	Glyma01g36101	Glyma01g36101	Gm01:48579414-48580534	ws82-0	ws82-14	NOTEST	0	0	0	0	1	1	no
Glyma01g36110	Glyma01g36110	Glyma01g36110	Gm01:48584816-48588333	ws82-0	ws82-14	OK	9.32481	8.98517	-0.0535288	0.120661	0.903959	0.991664	no
Glyma01g36120	Glyma01g36120	Glyma01g36120	Gm01:48599418-48603933	ws82-0	ws82-14	OK	1.28583	3.5208	1.4532	-2.36852	0.0178594	0.173008	no
Glyma01g36130	Glyma01g36130	Glyma01g36130	Gm01:48622283-48624709	ws82-0	ws82-14	NOTEST	0	0	0	0	1	1	no
Glyma01g36145	Glyma01g36145	Glyma01g36145	Gm01:48632045-48636339	ws82-0	ws82-14	OK	3.0826	1.87108	-0.720275	1.28575	0.19853	0.658763	no
Glyma01g36160	Glyma01g36160	Glyma01g36160	Gm01:48651554-48653174	ws82-0	ws82-14	OK	19.4893	22.8052	0.226675	-0.507315	0.611934	0.934265	no
Glyma01g36170	Glyma01g36170	Glyma01g36170	Gm01:48661585-48668062	ws82-0	ws82-14	OK	6.32757	6.16824	-0.0367927	0.081267	0.93523	0.995582	no
Glyma01g36180	Glyma01g36180	Glyma01g36180	Gm01:48677503-48687090	ws82-0	ws82-14	OK	2.97681	4.67495	0.651184	-1.11355	0.265473	0.740574	no
Glyma01g36190	Glyma01g36190	Glyma01g36190	Gm01:48690497-48697620	ws82-0	ws82-14	NOTEST	0	0	0	0	1	1	no
Glyma01g36200	Glyma01g36200	Glyma01g36200	Gm01:48703010-48710116	ws82-0	ws82-14	OK	6.71738	6.7813	0.0136632	-0.0307032	0.975506	0.997972	no
Glyma01g36210	Glyma01g36210	Glyma01g36210	Gm01:48710853-48716254	ws82-0	ws82-14	OK	32.5134	27.0785	-0.263887	0.557982	0.576856	0.923241	no
Glyma01g36225	Glyma01g36225	Glyma01g36225	Gm01:48732011-48735191	ws82-0	ws82-14	OK	0.605463	0.470328	-0.364373	0.488663	0.62508	0.939416	no
Glyma01g36240	Glyma01g36240	Glyma01g36240	Gm01:48735796-48738228	ws82-0	ws82-14	NOTEST	0.367697	0.282	-0.38282	0.491859	0.622819	1	no
Glyma01g36250	Glyma01g36250	Glyma01g36250	Gm01:48740116-48740919	ws82-0	ws82-14	OK	2.11357	0.914322	-1.20891	1.41775	0.156265	0.593828	no
Glyma01g36260	Glyma01g36260	Glyma01g36260	Gm01:48742924-48747330	ws82-0	ws82-14	OK	2.70524	3.21342	0.248352	-0.497396	0.61891	0.936076	no
Glyma01g36270	Glyma01g36270	Glyma01g36270	Gm01:48751691-48754081	ws82-0	ws82-14	OK	6.65997	6.4151	-0.0540443	0.119539	0.904848	0.991664	no
Glyma01g36280	Glyma01g36280	Glyma01g36280	Gm01:48755468-48766262	ws82-0	ws82-14	OK	3.17142	1.8093	-0.809698	1.67582	0.0937736	0.459634	no
Glyma01g36290	Glyma01g36290	Glyma01g36290	Gm01:48768219-48769858	ws82-0	ws82-14	OK	6.95375	4.62796	-0.587415	0.940896	0.346758	0.813017	no
Glyma01g36301	Glyma01g36301	Glyma01g36301	Gm01:48784769-48791019	ws82-0	ws82-14	OK	0.342023	1.8989	2.473	-3.80829	0.000139929	0.00530885	yes
Glyma01g36311	Glyma01g36311	Glyma01g36311	Gm01:48803722-48809885	ws82-0	ws82-14	NOTEST	0	0	0	0	1	1	no
Glyma01g36320	Glyma01g36320	Glyma01g36320	Gm01:48810062-48812413	ws82-0	ws82-14	OK	4.4965	4.67686	0.0567378	-0.0888119	0.929231	0.994288	no
Glyma01g36330	Glyma01g36330	Glyma01g36330	Gm01:48812789-48816606	ws82-0	ws82-14	NOTEST	0	0	0	0	1	1	no
Glyma01g36340	Glyma01g36340	Glyma01g36340	Gm01:48817174-48822812	ws82-0	ws82-14	OK	7.12139	5.45603	-0.384307	0.85444	0.392861	0.84351	no
Glyma01g36350	Glyma01g36350	Glyma01g36350	Gm01:48822940-48825606	ws82-0	ws82-14	NOTEST	0.0883002	0.375587	2.08866	-2.30778	0.0210112	1	no
Glyma01g36360	Glyma01g36360	Glyma01g36360	Gm01:48830588-48836103	ws82-0	ws82-14	NOTEST	0.190759	0.207199	0.119262	-0.127961	0.89818	1	no
Glyma01g36375	Glyma01g36375	Glyma01g36375	Gm01:48848060-48848643	ws82-0	ws82-14	NOTEST	0	0	0	0	1	1	no
Glyma01g36390	Glyma01g36390	Glyma01g36390	Gm01:48865791-48875859	ws82-0	ws82-14	OK	2.15821	2.62443	0.282167	-0.54979	0.582464	0.924821	no
Glyma01g36410	Glyma01g36410	Glyma01g36410	Gm01:48903092-48909719	ws82-0	ws82-14	OK	16.929	21.4883	0.344051	-0.761729	0.446222	0.87228	no
Glyma01g36420	Glyma01g36420	Glyma01g36420	Gm01:48925196-48933027	ws82-0	ws82-14	OK	0.757391	0.525738	-0.526694	0.589822	0.55531	0.916844	no
Glyma01g36430	Glyma01g36430	Glyma01g36430	Gm01:48939588-48943055	ws82-0	ws82-14	OK	0.757964	0.64593	-0.230753	0.323889	0.746022	0.968817	no
Glyma01g36440	Glyma01g36440	Glyma01g36440	Gm01:48945635-48947617	ws82-0	ws82-14	OK	4.59903	8.52173	0.889816	-1.9476	0.0514622	0.328844	no
Glyma01g36450	Glyma01g36450	Glyma01g36450	Gm01:48961667-48971891	ws82-0	ws82-14	OK	5.13393	3.88284	-0.402953	0.900887	0.367648	0.827614	no
Glyma01g36460	Glyma01g36460	Glyma01g36460	Gm01:48974134-48978029	ws82-0	ws82-14	OK	0.493056	0.408058	-0.272977	0.344236	0.730669	0.966075	no
Glyma01g36480	Glyma01g36480	Glyma01g36480	Gm01:48987938-48990441	ws82-0	ws82-14	OK	33.1399	26.0259	-0.348621	0.785192	0.432341	0.864584	no
Glyma01g36490	Glyma01g36490	Glyma01g36490	Gm01:48994357-48995257	ws82-0	ws82-14	NOTEST	0	0	0	0	1	1	no
Glyma01g36500	Glyma01g36500	Glyma01g36500	Gm01:48997060-49003679	ws82-0	ws82-14	NOTEST	0.251163	0.180328	-0.478	0.579281	0.5624	1	no
Glyma01g36510	Glyma01g36510	Glyma01g36510	Gm01:49007099-49008173	ws82-0	ws82-14	NOTEST	0	0	0	0	1	1	no
Glyma01g36520	Glyma01g36520	Glyma01g36520	Gm01:49010426-49011305	ws82-0	ws82-14	NOTEST	0	0	0	0	1	1	no
Glyma01g36530	Glyma01g36530	Glyma01g36530	Gm01:49013986-49014688	ws82-0	ws82-14	NOTEST	0	0	0	0	1	1	no
Glyma01g36545	Glyma01g36545	Glyma01g36545	Gm01:49022248-49027494	ws82-0	ws82-14	NOTEST	0	0	0	0	1	1	no
Glyma01g36560	Glyma01g36560	Glyma01g36560	Gm01:49029694-49030771	ws82-0	ws82-14	NOTEST	0	0	0	0	1	1	no
Glyma01g36570	Glyma01g36570	Glyma01g36570	Gm01:49038832-49039771	ws82-0	ws82-14	NOTEST	0.191869	0	-1.79769e+308	-1.79769e+308	0.0398236	1	no
Glyma01g36580	Glyma01g36580	Glyma01g36580	Gm01:49043808-49044992	ws82-0	ws82-14	NOTEST	0	0	0	0	1	1	no
Glyma01g36590	Glyma01g36590	Glyma01g36590	Gm01:49051914-49056921	ws82-0	ws82-14	OK	0.316259	0.486436	0.621143	-0.81023	0.417808	0.857829	no
Glyma01g36600	Glyma01g36600	Glyma01g36600	Gm01:49064175-49066310	ws82-0	ws82-14	OK	8.49749	5.53142	-0.619387	1.26441	0.206084	0.669492	no
Glyma01g36606	Glyma01g36606	Glyma01g36606	Gm01:49068914-49070036	ws82-0	ws82-14	OK	6.49111	3.8514	-0.753082	1.45317	0.146178	0.578905	no
Glyma01g36613	Glyma01g36613	Glyma01g36613	Gm01:49070073-49072214	ws82-0	ws82-14	OK	6.2683	3.09662	-1.01738	1.89186	0.0585102	0.355421	no
Glyma01g36620	Glyma01g36620	Glyma01g36620	Gm01:49074667-49077300	ws82-0	ws82-14	OK	860.287	448.79	-0.938778	1.61398	0.106532	0.495455	no
Glyma01g36630	Glyma01g36630	Glyma01g36630	Gm01:49084944-49093758	ws82-0	ws82-14	OK	9.00783	3.62121	-1.31471	2.61269	0.00898338	0.110076	no
Glyma01g36638	Glyma01g36638	Glyma01g36638	Gm01:49107386-49109822	ws82-0	ws82-14	OK	10.9265	13.2722	0.280566	-0.587513	0.556859	0.917544	no
Glyma01g36646	Glyma01g36646	Glyma01g36646	Gm01:49109982-49111565	ws82-0	ws82-14	OK	6.30419	5.48822	-0.199972	0.312844	0.7544	0.969883	no
Glyma01g36654	Glyma01g36654	Glyma01g36654	Gm01:49113570-49119201	ws82-0	ws82-14	OK	3.93716	2.48088	-0.666304	0.611255	0.541031	0.910399	no
Glyma01g36662	Glyma01g36662	Glyma01g36662	Gm01:49119339-49122865	ws82-0	ws82-14	OK	20.1577	15.4249	-0.386067	0.864069	0.38755	0.839312	no
Glyma01g36670	Glyma01g36670	Glyma01g36670	Gm01:49124364-49127508	ws82-0	ws82-14	OK	17.829	13.8037	-0.369171	0.703697	0.481622	0.888182	no
Glyma01g36680	Glyma01g36680	Glyma01g36680	Gm01:49129327-49137766	ws82-0	ws82-14	OK	2.71254	2.93599	0.114199	-0.242621	0.808299	0.978092	no
Glyma01g36691	Glyma01g36691	Glyma01g36691	Gm01:49144740-49145859	ws82-0	ws82-14	NOTEST	0	0.104138	1.79769e+308	1.79769e+308	0.162559	1	no
Glyma01g36700	Glyma01g36700	Glyma01g36700	Gm01:49146933-49155639	ws82-0	ws82-14	OK	14.6085	8.09999	-0.850814	1.7281	0.0839699	0.432206	no
Glyma01g36711	Glyma01g36711	Glyma01g36711	Gm01:49159187-49159524	ws82-0	ws82-14	OK	0.620357	0.617605	-0.0064138	0.00313628	0.997498	0.999442	no
Glyma01g36720	Glyma01g36720	Glyma01g36720	Gm01:49164706-49167830	ws82-0	ws82-14	OK	0.728613	3.95565	2.44069	-3.48198	0.000497717	0.013996	yes
Glyma01g36730	Glyma01g36730	Glyma01g36730	Gm01:49171301-49172211	ws82-0	ws82-14	OK	0.201414	0.645514	1.68029	-1.64658	0.0996454	0.476503	no
Glyma01g36740	Glyma01g36740	Glyma01g36740	Gm01:49175886-49179312	ws82-0	ws82-14	OK	12.6223	14.3863	0.188713	-0.41246	0.680002	0.952979	no
Glyma01g36750	Glyma01g36750	Glyma01g36750	Gm01:49180569-49188788	ws82-0	ws82-14	OK	11.576	16.8578	0.542281	-1.20161	0.229514	0.699863	no
Glyma01g36760	Glyma01g36760	Glyma01g36760	Gm01:49196842-49199569	ws82-0	ws82-14	OK	3.88869	6.32628	0.702072	-1.12697	0.259753	0.73604	no
Glyma01g36770	Glyma01g36770	Glyma01g36770	Gm01:49207142-49211246	ws82-0	ws82-14	OK	5.74509	9.8376	0.775977	-1.50267	0.132924	0.551177	no
Glyma01g36780	Glyma01g36780	Glyma01g36780	Gm01:49213870-49215923	ws82-0	ws82-14	OK	9.74165	29.5189	1.5994	-3.31206	0.000926111	0.0223855	yes
Glyma01g36790	Glyma01g36790	Glyma01g36790	Gm01:49215924-49218539	ws82-0	ws82-14	OK	5.34734	3.27857	-0.705755	1.02198	0.306791	0.780343	no
Glyma01g36801	Glyma01g36801	Glyma01g36801	Gm01:49220679-49225998	ws82-0	ws82-14	OK	4.56909	3.69796	-0.305176	0.664345	0.506469	0.895694	no
Glyma01g36810	Glyma01g36810	Glyma01g36810	Gm01:49235149-49235590	ws82-0	ws82-14	NOTEST	0	0	0	0	1	1	no
Glyma01g36820	Glyma01g36820	Glyma01g36820	Gm01:49253297-49254542	ws82-0	ws82-14	NOTEST	0.0715113	0.372121	2.37953	-1.50861	0.131399	1	no
Glyma01g36831	Glyma01g36831	Glyma01g36831	Gm01:49256521-49258723	ws82-0	ws82-14	OK	1.29142	0.869037	-0.571468	0.790383	0.429304	0.863766	no
Glyma01g36840	Glyma01g36840	Glyma01g36840	Gm01:49263069-49265363	ws82-0	ws82-14	OK	1.91432	1.92878	0.0108571	-0.0202304	0.98386	0.998884	no
Glyma01g36850	Glyma01g36850	Glyma01g36850	Gm01:49266433-49268941	ws82-0	ws82-14	OK	102.128	79.1949	-0.366902	0.781573	0.434465	0.866042	no
Glyma01g36860	Glyma01g36860	Glyma01g36860	Gm01:49271742-49278414	ws82-0	ws82-14	OK	2.30199	3.35086	0.541652	-0.95524	0.339456	0.807597	no
Glyma01g36870	Glyma01g36870	Glyma01g36870	Gm01:49289720-49299050	ws82-0	ws82-14	OK	8.00835	6.3892	-0.32587	0.733364	0.463337	0.880401	no
Glyma01g36880	Glyma01g36880	Glyma01g36880	Gm01:49300170-49302868	ws82-0	ws82-14	OK	15.9015	20.643	0.37649	-0.790702	0.429118	0.863766	no
Glyma01g36890	Glyma01g36890	Glyma01g36890	Gm01:49306067-49309782	ws82-0	ws82-14	OK	44.9649	27.1659	-0.727004	1.59727	0.110205	0.504359	no
Glyma01g36900	Glyma01g36900	Glyma01g36900	Gm01:49311611-49314379	ws82-0	ws82-14	OK	0.729341	0.91092	0.320732	-0.416411	0.67711	0.952242	no
Glyma01g36920	Glyma01g36920	Glyma01g36920	Gm01:49322909-49327222	ws82-0	ws82-14	NOTEST	0.0166988	0	-1.79769e+308	-1.79769e+308	0.155783	1	no
Glyma01g36931	Glyma01g36931	Glyma01g36931	Gm01:49327330-49331955	ws82-0	ws82-14	NOTEST	0.159761	0.221646	0.472339	-0.358822	0.719728	1	no
Glyma01g36940	Glyma01g36940	Glyma01g36940	Gm01:49334742-49338803	ws82-0	ws82-14	OK	0.0971255	0.643425	2.72785	-2.36616	0.0179739	0.173798	no
Glyma01g36950	Glyma01g36950	Glyma01g36950	Gm01:49340202-49347954	ws82-0	ws82-14	NOTEST	0.0889006	0.0114209	-2.96052	1.84889	0.0644731	1	no
Glyma01g36960	Glyma01g36960	Glyma01g36960	Gm01:49357372-49363143	ws82-0	ws82-14	OK	7.65857	5.13804	-0.575856	1.26694	0.205178	0.668208	no
Glyma01g36980	Glyma01g36980	Glyma01g36980	Gm01:49366425-49374835	ws82-0	ws82-14	NOTEST	0	0	0	0	1	1	no
Glyma01g36990	Glyma01g36990	Glyma01g36990	Gm01:49378227-49384148	ws82-0	ws82-14	OK	10.49	11.5732	0.141769	-0.318806	0.749873	0.969309	no
Glyma01g37000	Glyma01g37000	Glyma01g37000	Gm01:49386620-49392224	ws82-0	ws82-14	NOTEST	0.0586973	0.131535	1.16408	-0.72399	0.469072	1	no
Glyma01g37010	Glyma01g37010	Glyma01g37010	Gm01:49392804-49394717	ws82-0	ws82-14	OK	8.58002	5.55472	-0.627266	1.25164	0.210699	0.675305	no
Glyma01g37020	Glyma01g37020	Glyma01g37020	Gm01:49402192-49404630	ws82-0	ws82-14	OK	53.1009	50.5728	-0.0703741	0.149229	0.881373	0.987969	no
Glyma01g37031	Glyma01g37031	Glyma01g37031	Gm01:49405105-49407262	ws82-0	ws82-14	OK	0.913448	0.568945	-0.683035	0.850622	0.39498	0.84433	no
Glyma01g37040	Glyma01g37040	Glyma01g37040	Gm01:49421021-49423263	ws82-0	ws82-14	NOTEST	0.215897	0.417069	0.949941	-1.13572	0.256074	1	no
Glyma01g37051	Glyma01g37051	Glyma01g37051	Gm01:49432478-49435070	ws82-0	ws82-14	NOTEST	0	0	0	0	1	1	no
Glyma01g37060	Glyma01g37060	Glyma01g37060	Gm01:49439171-49440019	ws82-0	ws82-14	NOTEST	0	0	0	0	1	1	no
Glyma01g37080	Glyma01g37080	Glyma01g37080	Gm01:49455121-49457778	ws82-0	ws82-14	OK	2.26337	3.12625	0.465965	-0.980794	0.326695	0.797848	no
Glyma01g37090	Glyma01g37090	Glyma01g37090	Gm01:49471613-49473084	ws82-0	ws82-14	OK	85.0648	135.565	0.672346	-1.38511	0.166018	0.60715	no
Glyma01g37100	Glyma01g37100	Glyma01g37100	Gm01:49482623-49488331	ws82-0	ws82-14	OK	2.11854	2.70794	0.354121	-0.647559	0.51727	0.900093	no
Glyma01g37120	Glyma01g37120	Glyma01g37120	Gm01:49513343-49516212	ws82-0	ws82-14	NOTEST	0	0	0	0	1	1	no
Glyma01g37130	Glyma01g37130	Glyma01g37130	Gm01:49518056-49520062	ws82-0	ws82-14	NOTEST	0.0426442	0.038422	-0.150416	0.0735519	0.941367	1	no
Glyma01g37136	Glyma01g37136	Glyma01g37136	Gm01:49520615-49552178	ws82-0	ws82-14	OK	3.49472	2.29177	-0.608713	1.35353	0.175886	0.624422	no
Glyma01g37143	Glyma01g37143	Glyma01g37143	Gm01:49520615-49552178	ws82-0	ws82-14	NOTEST	0	0	0	0	1	1	no
Glyma01g37150	Glyma01g37150	Glyma01g37150	Gm01:49557207-49558582	ws82-0	ws82-14	NOTEST	0.138246	0.2151	0.637767	-0.588891	0.555934	1	no
Glyma01g37160	Glyma01g37160	Glyma01g37160	Gm01:49559523-49562407	ws82-0	ws82-14	OK	2.3585	4.22482	0.841021	-1.31743	0.187695	0.643094	no
Glyma01g37180	Glyma01g37180	Glyma01g37180	Gm01:49563492-49567476	ws82-0	ws82-14	OK	5.80351	7.38031	0.346756	-0.738772	0.460046	0.879161	no
Glyma01g37190	Glyma01g37190	Glyma01g37190	Gm01:49585069-49586870	ws82-0	ws82-14	NOTEST	0	0	0	0	1	1	no
Glyma01g37200	Glyma01g37200	Glyma01g37200	Gm01:49597448-49598567	ws82-0	ws82-14	OK	0	0.55079	1.79769e+308	1.79769e+308	0.0134277	0.143275	no
Glyma01g37215	Glyma01g37215	Glyma01g37215	Gm01:49610632-49612072	ws82-0	ws82-14	NOTEST	0.0872439	0.197219	1.17667	-0.827604	0.407895	1	no
Glyma01g37230	Glyma01g37230	Glyma01g37230	Gm01:49610632-49612072	ws82-0	ws82-14	NOTEST	0	0	0	0	1	1	no
Glyma01g37240	Glyma01g37240	Glyma01g37240	Gm01:49616496-49621295	ws82-0	ws82-14	NOTEST	0.24448	0.249154	0.0273218	-0.0342897	0.972646	1	no
Glyma01g37250	Glyma01g37250	Glyma01g37250	Gm01:49624839-49626433	ws82-0	ws82-14	OK	46.3948	32.0163	-0.535156	1.17672	0.239306	0.71245	no
Glyma01g37270	Glyma01g37270	Glyma01g37270	Gm01:49637622-49639519	ws82-0	ws82-14	OK	52.3829	30.6935	-0.771164	1.64097	0.100803	0.480142	no
Glyma01g37290	Glyma01g37290	Glyma01g37290	Gm01:49639992-49643961	ws82-0	ws82-14	OK	7.30799	7.29398	-0.00276691	0.00455832	0.996363	0.999442	no
Glyma01g37296	Glyma01g37296	Glyma01g37296	Gm01:49646115-49646903	ws82-0	ws82-14	OK	232.413	294.638	0.342251	-0.763277	0.445298	0.872163	no
Glyma01g37303	Glyma01g37303	Glyma01g37303	Gm01:49646973-49647556	ws82-0	ws82-14	OK	1.78094	1.99854	0.166309	-0.191443	0.848178	0.983438	no
Glyma01g37310	Glyma01g37310	Glyma01g37310	Gm01:49651805-49656854	ws82-0	ws82-14	OK	0.425565	0.534728	0.329426	-0.411621	0.680617	0.953313	no
Glyma01g37320	Glyma01g37320	Glyma01g37320	Gm01:49680382-49682445	ws82-0	ws82-14	OK	18.9521	19.3655	0.0311325	-0.0698157	0.94434	0.996203	no
Glyma01g37330	Glyma01g37330	Glyma01g37330	Gm01:49688213-49691604	ws82-0	ws82-14	NOTEST	0.0835734	0.126208	0.59469	-0.632846	0.526834	1	no
Glyma01g37341	Glyma01g37341	Glyma01g37341	Gm01:49698283-49706430	ws82-0	ws82-14	OK	3.149	7.78295	1.30542	-2.87476	0.00404331	0.0642217	no
Glyma01g37350	Glyma01g37350	Glyma01g37350	Gm01:49711599-49713520	ws82-0	ws82-14	NOTEST	0	0	0	0	1	1	no
Glyma01g37360	Glyma01g37360	Glyma01g37360	Gm01:49721188-49723541	ws82-0	ws82-14	OK	1.24802	2.3606	0.919513	-1.2959	0.195011	0.653862	no
Glyma01g37370	Glyma01g37370	Glyma01g37370	Gm01:49725132-49728656	ws82-0	ws82-14	OK	21.9407	17.3374	-0.339721	0.764781	0.444402	0.871626	no
Glyma01g37380	Glyma01g37380	Glyma01g37380	Gm01:49736248-49744811	ws82-0	ws82-14	OK	9.22434	6.49328	-0.506498	1.09967	0.271476	0.74652	no
Glyma01g37393	Glyma01g37393	Glyma01g37393	Gm01:49755262-49762118	ws82-0	ws82-14	OK	6.49284	4.83251	-0.426076	0.959142	0.337487	0.806414	no
Glyma01g37406	Glyma01g37406	Glyma01g37406	Gm01:49766181-49770448	ws82-0	ws82-14	OK	7.18432	5.94603	-0.272925	0.591878	0.553932	0.915932	no
Glyma01g37420	Glyma01g37420	Glyma01g37420	Gm01:49772165-49778547	ws82-0	ws82-14	OK	3.54584	2.69144	-0.39775	0.835095	0.403664	0.849185	no
Glyma01g37430	Glyma01g37430	Glyma01g37430	Gm01:49781351-49784822	ws82-0	ws82-14	OK	0.22609	1.3839	2.61377	-3.72682	0.000193909	0.00675356	yes
Glyma01g37440	Glyma01g37440	Glyma01g37440	Gm01:49804689-49806831	ws82-0	ws82-14	NOTEST	0	0	0	0	1	1	no
Glyma01g37450	Glyma01g37450	Glyma01g37450	Gm01:49804689-49806831	ws82-0	ws82-14	OK	1.91725	1.88082	-0.0276764	0.0492012	0.960759	0.997377	no
Glyma01g37460	Glyma01g37460	Glyma01g37460	Gm01:49816977-49818918	ws82-0	ws82-14	OK	3.86414	7.30572	0.918878	-1.97369	0.0484165	0.317508	no
Glyma01g37470	Glyma01g37470	Glyma01g37470	Gm01:49821773-49824393	ws82-0	ws82-14	NOTEST	0	0	0	0	1	1	no
Glyma01g37480	Glyma01g37480	Glyma01g37480	Gm01:49830529-49834966	ws82-0	ws82-14	OK	30.4394	28.1545	-0.112574	0.253756	0.799684	0.976083	no
Glyma01g37490	Glyma01g37490	Glyma01g37490	Gm01:49841544-49848877	ws82-0	ws82-14	OK	4.71035	3.28977	-0.517846	0.97811	0.32802	0.799073	no
Glyma01g37500	Glyma01g37500	Glyma01g37500	Gm01:49850120-49854265	ws82-0	ws82-14	OK	6.26615	8.51231	0.441972	-0.990115	0.322118	0.793383	no
Glyma01g37510	Glyma01g37510	Glyma01g37510	Gm01:49858452-49865847	ws82-0	ws82-14	NOTEST	0.0265244	0.0980365	1.886	-1.17341	0.240632	1	no
Glyma01g37520	Glyma01g37520	Glyma01g37520	Gm01:49869523-49871376	ws82-0	ws82-14	OK	1.04086	1.03998	-0.00122094	0.00184828	0.998525	0.999717	no
Glyma01g37530	Glyma01g37530	Glyma01g37530	Gm01:49872196-49872388	ws82-0	ws82-14	NOTEST	0	0	0	0	1	1	no
Glyma01g37541	Glyma01g37541	Glyma01g37541	Gm01:49879281-49885195	ws82-0	ws82-14	OK	5.22435	27.1333	2.37674	-5.18652	2.14264e-07	2.64426e-05	yes
Glyma01g37550	Glyma01g37550	Glyma01g37550	Gm01:49885628-49888995	ws82-0	ws82-14	OK	115.129	137.841	0.259758	-0.54995	0.582353	0.924821	no
Glyma01g37560	Glyma01g37560	Glyma01g37560	Gm01:49891280-49893312	ws82-0	ws82-14	OK	7.94056	9.453	0.251531	-0.452891	0.650628	0.945905	no
Glyma01g37571	Glyma01g37571	Glyma01g37571	Gm01:49893933-49905366	ws82-0	ws82-14	NOTEST	0	0	0	0	1	1	no
Glyma01g37580	Glyma01g37580	Glyma01g37580	Gm01:49893933-49905366	ws82-0	ws82-14	OK	14.6917	13.587	-0.11277	0.249352	0.803089	0.976946	no
Glyma01g37590	Glyma01g37590	Glyma01g37590	Gm01:49909450-49916251	ws82-0	ws82-14	OK	0.691308	0.676633	-0.0309539	0.0454876	0.963719	0.997663	no
Glyma01g37600	Glyma01g37600	Glyma01g37600	Gm01:49942124-49946080	ws82-0	ws82-14	NOTEST	0	0	0	0	1	1	no
Glyma01g37610	Glyma01g37610	Glyma01g37610	Gm01:49946274-49947782	ws82-0	ws82-14	OK	8.1386	7.8944	-0.0439514	0.0731974	0.941649	0.995744	no
Glyma01g37620	Glyma01g37620	Glyma01g37620	Gm01:49949013-49952809	ws82-0	ws82-14	OK	0.701562	1.11464	0.667935	-1.10632	0.268587	0.74388	no
Glyma01g37630	Glyma01g37630	Glyma01g37630	Gm01:49953469-49956749	ws82-0	ws82-14	NOTEST	0.178866	0.19401	0.117252	-0.121069	0.903637	1	no
Glyma01g37640	Glyma01g37640	Glyma01g37640	Gm01:49963812-49969112	ws82-0	ws82-14	NOTEST	0.0235136	0	-1.79769e+308	-1.79769e+308	0.155783	1	no
Glyma01g37650	Glyma01g37650	Glyma01g37650	Gm01:49975720-49977560	ws82-0	ws82-14	NOTEST	0	0.16926	1.79769e+308	1.79769e+308	0.0162588	1	no
Glyma01g37670	Glyma01g37670	Glyma01g37670	Gm01:49982520-49986256	ws82-0	ws82-14	OK	3.8883	2.92096	-0.412696	0.849876	0.395394	0.844814	no
Glyma01g37675	Glyma01g37675	Glyma01g37675	Gm01:49992409-49993063	ws82-0	ws82-14	NOTEST	0	0	0	0	1	1	no
Glyma01g37680	Glyma01g37680	Glyma01g37680	Gm01:49999698-50001148	ws82-0	ws82-14	NOTEST	0	0	0	0	1	1	no
Glyma01g37690	Glyma01g37690	Glyma01g37690	Gm01:50011031-50012116	ws82-0	ws82-14	NOTEST	0.159443	0.103729	-0.620224	0.468534	0.639403	1	no
Glyma01g37710	Glyma01g37710	Glyma01g37710	Gm01:50023553-50027805	ws82-0	ws82-14	OK	15.0263	10.5786	-0.506339	1.12767	0.259458	0.735905	no
Glyma01g37720	Glyma01g37720	Glyma01g37720	Gm01:50028224-50031144	ws82-0	ws82-14	OK	14.4475	30.9177	1.09761	-2.39062	0.0168198	0.166142	no
Glyma01g37730	Glyma01g37730	Glyma01g37730	Gm01:50039747-50044012	ws82-0	ws82-14	OK	4.35805	6.75856	0.633034	-1.38023	0.167514	0.609793	no
Glyma01g37750	Glyma01g37750	Glyma01g37750	Gm01:50051364-50051706	ws82-0	ws82-14	OK	0.356355	1.03292	1.53534	-0.926	0.354446	0.81909	no
Glyma01g37760	Glyma01g37760	Glyma01g37760	Gm01:50053788-50061598	ws82-0	ws82-14	OK	0.979067	2.29331	1.22795	-2.56552	0.0103022	0.120459	no
Glyma01g37780	Glyma01g37780	Glyma01g37780	Gm01:50066372-50070574	ws82-0	ws82-14	OK	11.8891	14.0109	0.236906	-0.526384	0.598621	0.92958	no
Glyma01g37790	Glyma01g37790	Glyma01g37790	Gm01:50071761-50075271	ws82-0	ws82-14	OK	14.9998	13.7046	-0.130289	0.284472	0.776049	0.972265	no
Glyma01g37801	Glyma01g37801	Glyma01g37801	Gm01:50076638-50080885	ws82-0	ws82-14	NOTEST	0	0.0202815	1.79769e+308	1.79769e+308	0.162559	1	no
Glyma01g37810	Glyma01g37810	Glyma01g37810	Gm01:50095935-50098278	ws82-0	ws82-14	OK	7.09874	4.40505	-0.688404	1.41351	0.157507	0.595296	no
Glyma01g37820	Glyma01g37820	Glyma01g37820	Gm01:50121728-50127532	ws82-0	ws82-14	NOTEST	0.214838	0.418221	0.961018	-1.09489	0.273566	1	no
Glyma01g37840	Glyma01g37840	Glyma01g37840	Gm01:50130998-50133253	ws82-0	ws82-14	NOTEST	0	0	0	0	1	1	no
Glyma01g37850	Glyma01g37850	Glyma01g37850	Gm01:50135076-50137305	ws82-0	ws82-14	NOTEST	0.129437	0.351033	1.43935	-1.39931	0.161719	1	no
Glyma01g37860	Glyma01g37860	Glyma01g37860	Gm01:50141791-50144442	ws82-0	ws82-14	OK	1.24653	1.00434	-0.311679	0.471756	0.637101	0.942784	no
Glyma01g37870	Glyma01g37870	Glyma01g37870	Gm01:50146983-50150059	ws82-0	ws82-14	OK	26.4021	27.6474	0.0664941	-0.135882	0.891915	0.989792	no
Glyma01g37880	Glyma01g37880	Glyma01g37880	Gm01:50151986-50153270	ws82-0	ws82-14	NOTEST	0.0870813	0.0411729	-1.08067	0.607357	0.543614	1	no
Glyma01g37890	Glyma01g37890	Glyma01g37890	Gm01:50153494-50155300	ws82-0	ws82-14	OK	4.83213	3.12172	-0.630319	1.24149	0.214423	0.681156	no
Glyma01g37900	Glyma01g37900	Glyma01g37900	Gm01:50155332-50163097	ws82-0	ws82-14	OK	102.858	82.0505	-0.326072	0.662823	0.507444	0.89611	no
Glyma01g37910	Glyma01g37910	Glyma01g37910	Gm01:50155332-50163097	ws82-0	ws82-14	OK	3.51621	1.84286	-0.932073	0.450892	0.652068	0.946557	no
Glyma01g37920	Glyma01g37920	Glyma01g37920	Gm01:50155332-50163097	ws82-0	ws82-14	NOTEST	0.202954	0.187794	-0.111998	0.012756	0.989822	1	no
Glyma01g37930	Glyma01g37930	Glyma01g37930	Gm01:50166501-50169549	ws82-0	ws82-14	OK	0.261812	0.502793	0.941433	-1.18771	0.234948	0.706486	no
Glyma01g37940	Glyma01g37940	Glyma01g37940	Gm01:50177417-50180805	ws82-0	ws82-14	OK	11.6371	10.8492	-0.101142	0.227927	0.819703	0.979224	no
Glyma01g37950	Glyma01g37950	Glyma01g37950	Gm01:50182416-50188946	ws82-0	ws82-14	OK	5.08865	2.42005	-1.07225	2.26809	0.0233235	0.204936	no
Glyma01g37961	Glyma01g37961	Glyma01g37961	Gm01:50206805-50209153	ws82-0	ws82-14	OK	0	0.562608	1.79769e+308	1.79769e+308	0.025956	0.218161	no
Glyma01g37970	Glyma01g37970	Glyma01g37970	Gm01:50210431-50216350	ws82-0	ws82-14	OK	0.345181	0.935074	1.43773	-2.06923	0.0385248	0.277453	no
Glyma01g37980	Glyma01g37980	Glyma01g37980	Gm01:50217118-50219743	ws82-0	ws82-14	NOTEST	0	0	0	0	1	1	no
Glyma01g37993	Glyma01g37993	Glyma01g37993	Gm01:50222810-50223758	ws82-0	ws82-14	OK	0.0501019	0.547861	3.45087	-2.23586	0.025361	0.216199	no
Glyma01g38006	Glyma01g38006	Glyma01g38006	Gm01:50230283-50235022	ws82-0	ws82-14	NOTEST	0	0	0	0	1	1	no
Glyma01g38020	Glyma01g38020	Glyma01g38020	Gm01:50230283-50235022	ws82-0	ws82-14	LOWDATA	0	0	0	0	1	1	no
Glyma01g38040	Glyma01g38040	Glyma01g38040	Gm01:50244376-50247091	ws82-0	ws82-14	NOTEST	0	0	0	0	1	1	no
Glyma01g38050	Glyma01g38050	Glyma01g38050	Gm01:50251094-50252088	ws82-0	ws82-14	NOTEST	0	0	0	0	1	1	no
Glyma01g38060	Glyma01g38060	Glyma01g38060	Gm01:50253664-50255929	ws82-0	ws82-14	NOTEST	0	0	0	0	1	1	no
Glyma01g38070	Glyma01g38070	Glyma01g38070	Gm01:50257294-50261107	ws82-0	ws82-14	OK	6.41133	6.48431	0.0163286	-0.03287	0.973778	0.997956	no
Glyma01g38080	Glyma01g38080	Glyma01g38080	Gm01:50257294-50261107	ws82-0	ws82-14	OK	0	1.28538	1.79769e+308	1.79769e+308	0.244041	0.717298	no
Glyma01g38090	Glyma01g38090	Glyma01g38090	Gm01:50261440-50263777	ws82-0	ws82-14	OK	9.20569	5.81722	-0.662195	1.45262	0.14633	0.57895	no
Glyma01g38105	Glyma01g38105	Glyma01g38105	Gm01:50271874-50276395	ws82-0	ws82-14	NOTEST	0.0198554	0.0376809	0.9243	-0.339352	0.734345	1	no
Glyma01g38120	Glyma01g38120	Glyma01g38120	Gm01:50277040-50282069	ws82-0	ws82-14	OK	29.7564	19.9633	-0.575853	1.26135	0.207183	0.671579	no
Glyma01g38130	Glyma01g38130	Glyma01g38130	Gm01:50286808-50291347	ws82-0	ws82-14	OK	0.662757	1.23815	0.901638	-1.31264	0.189305	0.64559	no
Glyma01g38150	Glyma01g38150	Glyma01g38150	Gm01:50297901-50304459	ws82-0	ws82-14	NOTEST	0.267477	0.290098	0.117126	-0.150585	0.880303	1	no
Glyma01g38165	Glyma01g38165	Glyma01g38165	Gm01:50306261-50309677	ws82-0	ws82-14	OK	3.20733	2.39704	-0.420121	0.642936	0.520266	0.901206	no
Glyma01g38180	Glyma01g38180	Glyma01g38180	Gm01:50334433-50339882	ws82-0	ws82-14	OK	3.90043	7.19969	0.884304	-1.79008	0.0734414	0.404689	no
Glyma01g38190	Glyma01g38190	Glyma01g38190	Gm01:50334433-50339882	ws82-0	ws82-14	OK	0.689236	1.19572	0.794813	-0.332866	0.739235	0.968432	no
Glyma01g38200	Glyma01g38200	Glyma01g38200	Gm01:50344732-50351525	ws82-0	ws82-14	OK	15.1098	20.3318	0.428253	-0.947336	0.343467	0.810913	no
Glyma01g38211	Glyma01g38211	Glyma01g38211	Gm01:50359266-50363158	ws82-0	ws82-14	OK	201.108	187.392	-0.101912	0.152728	0.878613	0.987894	no
Glyma01g38220	Glyma01g38220	Glyma01g38220	Gm01:50366968-50368330	ws82-0	ws82-14	NOTEST	0.258802	0.321098	0.311168	-0.326667	0.74392	1	no
Glyma01g38230	Glyma01g38230	Glyma01g38230	Gm01:50369093-50373219	ws82-0	ws82-14	OK	10.7282	8.27654	-0.374303	0.787176	0.431179	0.864209	no
Glyma01g38240	Glyma01g38240	Glyma01g38240	Gm01:50382617-50389821	ws82-0	ws82-14	OK	3.84869	2.33781	-0.719212	1.52506	0.127244	0.538761	no
Glyma01g38250	Glyma01g38250	Glyma01g38250	Gm01:50392826-50393355	ws82-0	ws82-14	NOTEST	0	0	0	0	1	1	no
Glyma01g38260	Glyma01g38260	Glyma01g38260	Gm01:50394489-50396439	ws82-0	ws82-14	OK	0.947324	0.700123	-0.436249	0.523842	0.600389	0.929944	no
Glyma01g38270	Glyma01g38270	Glyma01g38270	Gm01:50396914-50399570	ws82-0	ws82-14	OK	0.877612	1.44494	0.719352	-0.980891	0.326647	0.797813	no
Glyma01g38280	Glyma01g38280	Glyma01g38280	Gm01:50400416-50410022	ws82-0	ws82-14	NOTEST	0.374671	0.317108	-0.24065	0.336592	0.736424	1	no
Glyma01g38285	Glyma01g38285	Glyma01g38285	Gm01:50429282-50431539	ws82-0	ws82-14	NOTEST	0	0	0	0	1	1	no
Glyma01g38290	Glyma01g38290	Glyma01g38290	Gm01:50444755-50448681	ws82-0	ws82-14	OK	16.2433	14.1706	-0.196948	0.433881	0.664375	0.949333	no
Glyma01g38305	Glyma01g38305	Glyma01g38305	Gm01:50449917-50454973	ws82-0	ws82-14	OK	2.15034	1.88297	-0.191556	0.374582	0.707972	0.961764	no
Glyma01g38320	Glyma01g38320	Glyma01g38320	Gm01:50456603-50460237	ws82-0	ws82-14	OK	13.596	10.813	-0.330413	0.706661	0.479777	0.887545	no
Glyma01g38330	Glyma01g38330	Glyma01g38330	Gm01:50462526-50464658	ws82-0	ws82-14	OK	2.45548	3.53128	0.524184	-0.799259	0.42414	0.860984	no
Glyma01g38340	Glyma01g38340	Glyma01g38340	Gm01:50465731-50468463	ws82-0	ws82-14	NOTEST	0	0	0	0	1	1	no
Glyma01g38350	Glyma01g38350	Glyma01g38350	Gm01:50468718-50471279	ws82-0	ws82-14	NOTEST	0.0451394	0.0415052	-0.121097	0.0592152	0.952781	1	no
Glyma01g38360	Glyma01g38360	Glyma01g38360	Gm01:50481849-50484062	ws82-0	ws82-14	OK	8.35372	12.6382	0.597298	-1.34412	0.178909	0.629672	no
Glyma01g38370	Glyma01g38370	Glyma01g38370	Gm01:50487836-50491942	ws82-0	ws82-14	OK	12.2427	11.2284	-0.124765	0.262761	0.792735	0.974423	no
Glyma01g38381	Glyma01g38381	Glyma01g38381	Gm01:50492109-50499655	ws82-0	ws82-14	OK	1.91685	1.23224	-0.63745	0.874037	0.382098	0.836501	no
Glyma01g38390	Glyma01g38390	Glyma01g38390	Gm01:50502781-50505172	ws82-0	ws82-14	NOTEST	0.0503262	0.0950491	0.917365	-0.520412	0.602776	1	no
Glyma01g38400	Glyma01g38400	Glyma01g38400	Gm01:50522426-50525037	ws82-0	ws82-14	OK	1.63917	3.80037	1.21317	-2.2753	0.022888	0.20236	no
Glyma01g38410	Glyma01g38410	Glyma01g38410	Gm01:50528621-50536566	ws82-0	ws82-14	OK	23.2141	12.4972	-0.893394	1.82028	0.0687165	0.390702	no
Glyma01g38430	Glyma01g38430	Glyma01g38430	Gm01:50543383-50544862	ws82-0	ws82-14	NOTEST	0	0	0	0	1	1	no
Glyma01g38450	Glyma01g38450	Glyma01g38450	Gm01:50549840-50551564	ws82-0	ws82-14	OK	29.0033	23.8781	-0.280529	0.61681	0.53736	0.908227	no
Glyma01g38460	Glyma01g38460	Glyma01g38460	Gm01:50559469-50563981	ws82-0	ws82-14	OK	4.99587	2.83513	-0.81732	1.62526	0.104106	0.489391	no
Glyma01g38470	Glyma01g38470	Glyma01g38470	Gm01:50564247-50567428	ws82-0	ws82-14	OK	70.9459	68.8575	-0.0431049	0.0870188	0.930657	0.994433	no
Glyma01g38481	Glyma01g38481	Glyma01g38481	Gm01:50571005-50572016	ws82-0	ws82-14	NOTEST	0	0.15351	1.79769e+308	1.79769e+308	0.0441598	1	no
Glyma01g38490	Glyma01g38490	Glyma01g38490	Gm01:50575585-50578085	ws82-0	ws82-14	OK	0.519626	0.701234	0.432423	-0.497806	0.618621	0.936042	no
Glyma01g38500	Glyma01g38500	Glyma01g38500	Gm01:50580026-50582631	ws82-0	ws82-14	OK	2.85109	0.175023	-4.02589	5.21893	1.79959e-07	2.304e-05	yes
Glyma01g38510	Glyma01g38510	Glyma01g38510	Gm01:50585499-50587165	ws82-0	ws82-14	OK	11.0197	8.6672	-0.346451	0.753067	0.45141	0.874839	no
Glyma01g38520	Glyma01g38520	Glyma01g38520	Gm01:50595299-50597560	ws82-0	ws82-14	OK	1.14178	4.5881	2.00661	-3.67799	0.000235077	0.00781298	yes
Glyma01g38530	Glyma01g38530	Glyma01g38530	Gm01:50601604-50607434	ws82-0	ws82-14	NOTEST	0	0	0	0	1	1	no
Glyma01g38540	Glyma01g38540	Glyma01g38540	Gm01:50612385-50613848	ws82-0	ws82-14	NOTEST	0	0	0	0	1	1	no
Glyma01g38550	Glyma01g38550	Glyma01g38550	Gm01:50621610-50624263	ws82-0	ws82-14	NOTEST	0	0	0	0	1	1	no
Glyma01g38560	Glyma01g38560	Glyma01g38560	Gm01:50625695-50629374	ws82-0	ws82-14	OK	1.21252	0.327523	-1.88834	2.98728	0.00281468	0.0505499	no
Glyma01g38570	Glyma01g38570	Glyma01g38570	Gm01:50630573-50632809	ws82-0	ws82-14	NOTEST	0.0332912	0.0910233	1.45109	-0.87519	0.38147	1	no
Glyma01g38580	Glyma01g38580	Glyma01g38580	Gm01:50633743-50644902	ws82-0	ws82-14	OK	0.505829	0.355275	-0.509714	0.751158	0.452557	0.875575	no
Glyma01g38590	Glyma01g38590	Glyma01g38590	Gm01:50645459-50648060	ws82-0	ws82-14	OK	26.2159	5.56762	-2.23531	4.87138	1.10819e-06	0.000102524	yes
Glyma01g38600	Glyma01g38600	Glyma01g38600	Gm01:50652785-50654854	ws82-0	ws82-14	NOTEST	0	0	0	0	1	1	no
Glyma01g38610	Glyma01g38610	Glyma01g38610	Gm01:50657110-50660265	ws82-0	ws82-14	NOTEST	0	0.142111	1.79769e+308	1.79769e+308	0.0201927	1	no
Glyma01g38630	Glyma01g38630	Glyma01g38630	Gm01:50667181-50669294	ws82-0	ws82-14	NOTEST	0.0654975	0.029502	-1.15063	0.646676	0.517842	1	no
Glyma01g38640	Glyma01g38640	Glyma01g38640	Gm01:50682059-50689940	ws82-0	ws82-14	OK	12.3692	9.92165	-0.318105	0.681273	0.495699	0.893137	no
Glyma01g38650	Glyma01g38650	Glyma01g38650	Gm01:50714207-50721679	ws82-0	ws82-14	OK	60.4398	31.52	-0.939233	1.89021	0.0587304	0.356282	no
Glyma01g38660	Glyma01g38660	Glyma01g38660	Gm01:50733266-50737661	ws82-0	ws82-14	OK	0.767109	0.674916	-0.184724	0.276056	0.782505	0.973847	no
Glyma01g38671	Glyma01g38671	Glyma01g38671	Gm01:50746604-50760836	ws82-0	ws82-14	OK	1.6146	1.25668	-0.361556	0.687653	0.491671	0.892104	no
Glyma01g38680	Glyma01g38680	Glyma01g38680	Gm01:50767560-50772744	ws82-0	ws82-14	OK	2.88907	3.43822	0.251053	-0.520979	0.602381	0.930143	no
Glyma01g38683	Glyma01g38683	Glyma01g38683	Gm01:50776465-50776986	ws82-0	ws82-14	NOTEST	0	0	0	0	1	1	no
Glyma01g38686	Glyma01g38686	Glyma01g38686	Gm01:50778421-50779180	ws82-0	ws82-14	NOTEST	0	0	0	0	1	1	no
Glyma01g38690	Glyma01g38690	Glyma01g38690	Gm01:50779484-50780771	ws82-0	ws82-14	NOTEST	0.147063	0.148552	0.0145364	-0.0139424	0.988876	1	no
Glyma01g38710	Glyma01g38710	Glyma01g38710	Gm01:50784350-50784782	ws82-0	ws82-14	OK	0.490538	0.166055	-1.5627	0.9294	0.352682	0.817666	no
Glyma01g38720	Glyma01g38720	Glyma01g38720	Gm01:50799865-50800659	ws82-0	ws82-14	NOTEST	0	0.126702	1.79769e+308	1.79769e+308	0.082025	1	no
Glyma01g38730	Glyma01g38730	Glyma01g38730	Gm01:50805196-50807200	ws82-0	ws82-14	NOTEST	0.0931544	0.368018	1.98208	-1.97811	0.0479164	1	no
Glyma01g38740	Glyma01g38740	Glyma01g38740	Gm01:50808925-50811172	ws82-0	ws82-14	OK	2.88296	2.05098	-0.491242	0.717816	0.472871	0.884989	no
Glyma01g38750	Glyma01g38750	Glyma01g38750	Gm01:50813274-50815197	ws82-0	ws82-14	OK	1473.69	907.007	-0.700251	1.00894	0.313001	0.78494	no
Glyma01g38760	Glyma01g38760	Glyma01g38760	Gm01:50816662-50817396	ws82-0	ws82-14	NOTEST	0	0	0	0	1	1	no
Glyma01g38770	Glyma01g38770	Glyma01g38770	Gm01:50817872-50819939	ws82-0	ws82-14	OK	5.47305	1.78281	-1.61819	2.56795	0.0102303	0.119949	no
Glyma01g38780	Glyma01g38780	Glyma01g38780	Gm01:50823650-50825788	ws82-0	ws82-14	NOTEST	0.120889	0.0289231	-2.06339	1.25905	0.208013	1	no
Glyma01g38800	Glyma01g38800	Glyma01g38800	Gm01:50835383-50838753	ws82-0	ws82-14	OK	11.0073	11.5202	0.0657075	-0.148104	0.882261	0.988047	no
Glyma01g38830	Glyma01g38830	Glyma01g38830	Gm01:50842944-50844670	ws82-0	ws82-14	NOTEST	0	0	0	0	1	1	no
Glyma01g38840	Glyma01g38840	Glyma01g38840	Gm01:50846296-50851361	ws82-0	ws82-14	OK	3.02736	2.55502	-0.244728	0.478222	0.632492	0.941134	no
Glyma01g38850	Glyma01g38850	Glyma01g38850	Gm01:50852873-50855077	ws82-0	ws82-14	OK	1.69761	1.69868	0.000916849	-0.00143542	0.998855	0.999813	no
Glyma01g38860	Glyma01g38860	Glyma01g38860	Gm01:50858802-50861902	ws82-0	ws82-14	NOTEST	0.0312453	0.118083	1.91809	-1.19337	0.232724	1	no
Glyma01g38870	Glyma01g38870	Glyma01g38870	Gm01:50865163-50867505	ws82-0	ws82-14	NOTEST	0.0989782	0.113365	0.195788	-0.19277	0.847139	1	no
Glyma01g38880	Glyma01g38880	Glyma01g38880	Gm01:50879358-50885115	ws82-0	ws82-14	OK	1.10849	0.0522675	-4.40654	3.88674	0.000101598	0.0041284	yes
Glyma01g38890	Glyma01g38890	Glyma01g38890	Gm01:50885116-50891376	ws82-0	ws82-14	OK	4.53985	3.10934	-0.546035	1.20377	0.228679	0.698845	no
Glyma01g38900	Glyma01g38900	Glyma01g38900	Gm01:50896720-50898557	ws82-0	ws82-14	NOTEST	0	0	0	0	1	1	no
Glyma01g38905	Glyma01g38905	Glyma01g38905	Gm01:50904042-50904806	ws82-0	ws82-14	NOTEST	0	0	0	0	1	1	no
Glyma01g38910	Glyma01g38910	Glyma01g38910	Gm01:50905481-50907657	ws82-0	ws82-14	OK	1.80278	1.82311	0.0161782	-0.0243447	0.980578	0.998584	no
Glyma01g38920	Glyma01g38920	Glyma01g38920	Gm01:50914354-50920765	ws82-0	ws82-14	OK	1.27365	1.06249	-0.261517	0.441053	0.659175	0.947599	no
Glyma01g38930	Glyma01g38930	Glyma01g38930	Gm01:50921917-50923972	ws82-0	ws82-14	OK	74.2512	110.527	0.573911	-1.2123	0.225399	0.696208	no
Glyma01g38940	Glyma01g38940	Glyma01g38940	Gm01:50926261-50927303	ws82-0	ws82-14	OK	143.104	123.778	-0.2093	0.435747	0.66302	0.948821	no
Glyma01g38950	Glyma01g38950	Glyma01g38950	Gm01:50927363-50936118	ws82-0	ws82-14	OK	11.0408	12.8773	0.221987	-0.468807	0.639207	0.943376	no
Glyma01g38970	Glyma01g38970	Glyma01g38970	Gm01:50951026-50952807	ws82-0	ws82-14	OK	1.69022	0.668977	-1.33718	1.98566	0.0470707	0.311935	no
Glyma01g38980	Glyma01g38980	Glyma01g38980	Gm01:50956636-50960580	ws82-0	ws82-14	OK	1.16468	3.88242	1.73702	-3.13325	0.00172883	0.0354481	yes
Glyma01g38990	Glyma01g38990	Glyma01g38990	Gm01:50965004-50966084	ws82-0	ws82-14	OK	1.49732	0.094538	-3.98534	2.54513	0.0109238	0.125045	no
Glyma01g39000	Glyma01g39000	Glyma01g39000	Gm01:50968054-50971842	ws82-0	ws82-14	OK	4.08568	2.47187	-0.724972	1.5127	0.130356	0.546069	no
Glyma01g39010	Glyma01g39010	Glyma01g39010	Gm01:50973225-50978011	ws82-0	ws82-14	OK	1.85667	1.68708	-0.138189	0.267976	0.788718	0.974423	no
Glyma01g39020	Glyma01g39020	Glyma01g39020	Gm01:50978689-50990291	ws82-0	ws82-14	OK	7.44529	5.76421	-0.369206	0.787348	0.431078	0.864209	no
Glyma01g39030	Glyma01g39030	Glyma01g39030	Gm01:50993362-50998484	ws82-0	ws82-14	OK	9.82014	6.74995	-0.540867	1.04973	0.293843	0.769094	no
Glyma01g39040	Glyma01g39040	Glyma01g39040	Gm01:51015839-51018131	ws82-0	ws82-14	OK	0.478162	0.0804955	-2.57052	2.56385	0.0103519	0.120892	no
Glyma01g39050	Glyma01g39050	Glyma01g39050	Gm01:51020378-51026936	ws82-0	ws82-14	OK	2.89148	2.09943	-0.46181	0.883429	0.377005	0.833472	no
Glyma01g39060	Glyma01g39060	Glyma01g39060	Gm01:51032159-51036122	ws82-0	ws82-14	NOTEST	0.0244775	0	-1.79769e+308	-1.79769e+308	0.273856	1	no
Glyma01g39071	Glyma01g39071	Glyma01g39071	Gm01:51054324-51059649	ws82-0	ws82-14	NOTEST	0	0	0	0	1	1	no
Glyma01g39080	Glyma01g39080	Glyma01g39080	Gm01:51065275-51067178	ws82-0	ws82-14	NOTEST	0	0	0	0	1	1	no
Glyma01g39090	Glyma01g39090	Glyma01g39090	Gm01:51073678-51079219	ws82-0	ws82-14	OK	0.713865	1.47351	1.04553	-1.73757	0.0822863	0.428664	no
Glyma01g39100	Glyma01g39100	Glyma01g39100	Gm01:51080529-51083731	ws82-0	ws82-14	OK	4.15981	2.99525	-0.473841	0.947923	0.343169	0.810441	no
Glyma01g39110	Glyma01g39110	Glyma01g39110	Gm01:51090471-51105666	ws82-0	ws82-14	OK	0.617991	0.654384	0.0825509	-0.126815	0.899087	0.990731	no
Glyma01g39120	Glyma01g39120	Glyma01g39120	Gm01:51105888-51110702	ws82-0	ws82-14	OK	19.0226	30.0964	0.661878	-1.11352	0.265487	0.740574	no
Glyma01g39141	Glyma01g39141	Glyma01g39141	Gm01:51125197-51131131	ws82-0	ws82-14	OK	1.94036	2.07625	0.0976513	-0.200908	0.84077	0.98198	no
Glyma01g39160	Glyma01g39160	Glyma01g39160	Gm01:51146769-51147427	ws82-0	ws82-14	NOTEST	0	0	0	0	1	1	no
Glyma01g39170	Glyma01g39170	Glyma01g39170	Gm01:51153265-51154075	ws82-0	ws82-14	NOTEST	0	0	0	0	1	1	no
Glyma01g39180	Glyma01g39180	Glyma01g39180	Gm01:51160065-51160350	ws82-0	ws82-14	NOTEST	0	0	0	0	1	1	no
Glyma01g39190	Glyma01g39190	Glyma01g39190	Gm01:51164315-51168296	ws82-0	ws82-14	OK	0.793295	1.19701	0.593502	-0.678289	0.497589	0.893638	no
Glyma01g39200	Glyma01g39200	Glyma01g39200	Gm01:51176939-51182827	ws82-0	ws82-14	OK	52.5412	38.5816	-0.445538	0.969405	0.332343	0.803323	no
Glyma01g39220	Glyma01g39220	Glyma01g39220	Gm01:51195447-51198098	ws82-0	ws82-14	OK	3.59141	7.41986	1.04684	-2.21589	0.0266988	0.221839	no
Glyma01g39230	Glyma01g39230	Glyma01g39230	Gm01:51207026-51208664	ws82-0	ws82-14	NOTEST	0	0	0	0	1	1	no
Glyma01g39240	Glyma01g39240	Glyma01g39240	Gm01:51218796-51220209	ws82-0	ws82-14	OK	4.96	9.76761	0.977665	-1.98903	0.0466976	0.310028	no
Glyma01g39250	Glyma01g39250	Glyma01g39250	Gm01:51223239-51226456	ws82-0	ws82-14	OK	12.9602	8.58752	-0.593769	1.00186	0.316411	0.788531	no
Glyma01g39260	Glyma01g39260	Glyma01g39260	Gm01:51227462-51229777	ws82-0	ws82-14	OK	11.4313	3.86432	-1.5647	3.32222	0.000893051	0.0217633	yes
Glyma01g39270	Glyma01g39270	Glyma01g39270	Gm01:51234092-51236207	ws82-0	ws82-14	OK	93.2285	53.5535	-0.799789	1.65678	0.0975647	0.470474	no
Glyma01g39280	Glyma01g39280	Glyma01g39280	Gm01:51241780-51246700	ws82-0	ws82-14	OK	18.6512	10.8451	-0.782227	1.74993	0.0801299	0.423816	no
Glyma01g39290	Glyma01g39290	Glyma01g39290	Gm01:51259529-51261619	ws82-0	ws82-14	OK	2.62691	3.45475	0.395212	-0.798795	0.424409	0.860984	no
Glyma01g39300	Glyma01g39300	Glyma01g39300	Gm01:51273336-51279506	ws82-0	ws82-14	NOTEST	0	0	0	0	1	1	no
Glyma01g39306	Glyma01g39306	Glyma01g39306	Gm01:51273336-51279506	ws82-0	ws82-14	NOTEST	0	0	0	0	1	1	no
Glyma01g39313	Glyma01g39313	Glyma01g39313	Gm01:51280851-51284021	ws82-0	ws82-14	NOTEST	0	0	0	0	1	1	no
Glyma01g39320	Glyma01g39320	Glyma01g39320	Gm01:51287475-51290552	ws82-0	ws82-14	OK	3.11378	3.095	-0.00872433	0.0169311	0.986492	0.998956	no
Glyma01g39330	Glyma01g39330	Glyma01g39330	Gm01:51290922-51295650	ws82-0	ws82-14	OK	15.0729	12.6404	-0.253911	0.571944	0.56736	0.919899	no
Glyma01g39340	Glyma01g39340	Glyma01g39340	Gm01:51296877-51297857	ws82-0	ws82-14	OK	1.29678	2.04955	0.660371	-0.864539	0.387292	0.839312	no
Glyma01g39350	Glyma01g39350	Glyma01g39350	Gm01:51298441-51305321	ws82-0	ws82-14	OK	52.1737	62.4516	0.259416	-0.553339	0.580032	0.924204	no
Glyma01g39360	Glyma01g39360	Glyma01g39360	Gm01:51314677-51315832	ws82-0	ws82-14	NOTEST	0	0	0	0	1	1	no
Glyma01g39370	Glyma01g39370	Glyma01g39370	Gm01:51321188-51322374	ws82-0	ws82-14	OK	4.49183	5.71272	0.346873	-0.681985	0.495248	0.892955	no
Glyma01g39380	Glyma01g39380	Glyma01g39380	Gm01:51332253-51333769	ws82-0	ws82-14	NOTEST	0.0325477	0	-1.79769e+308	-1.79769e+308	0.155783	1	no
Glyma01g39391	Glyma01g39391	Glyma01g39391	Gm01:51334950-51335823	ws82-0	ws82-14	NOTEST	0	0	0	0	1	1	no
Glyma01g39401	Glyma01g39401	Glyma01g39401	Gm01:51345282-51346122	ws82-0	ws82-14	NOTEST	0	0	0	0	1	1	no
Glyma01g39410	Glyma01g39410	Glyma01g39410	Gm01:51349990-51355206	ws82-0	ws82-14	OK	2.92726	2.90958	-0.00874119	0.0146103	0.988343	0.9991	no
Glyma01g39420	Glyma01g39420	Glyma01g39420	Gm01:51355206-51358366	ws82-0	ws82-14	OK	4.95133	5.60908	0.179948	-0.393397	0.694026	0.957657	no
Glyma01g39430	Glyma01g39430	Glyma01g39430	Gm01:51363128-51376630	ws82-0	ws82-14	OK	0.424368	0.653831	0.6236	-1.05211	0.29275	0.767725	no
Glyma01g39440	Glyma01g39440	Glyma01g39440	Gm01:51376879-51383234	ws82-0	ws82-14	NOTEST	0	0	0	0	1	1	no
Glyma01g39451	Glyma01g39451	Glyma01g39451	Gm01:51385174-51388582	ws82-0	ws82-14	OK	0.496594	0.256275	-0.954375	1.16103	0.245632	0.71918	no
Glyma01g39460	Glyma01g39460	Glyma01g39460	Gm01:51397147-51399175	ws82-0	ws82-14	OK	3.89818	10.9307	1.48751	-2.906	0.00366077	0.0602223	no
Glyma01g39470	Glyma01g39470	Glyma01g39470	Gm01:51403228-51406259	ws82-0	ws82-14	OK	2.25939	5.32889	1.2379	-2.05902	0.0394927	0.281444	no
Glyma01g39480	Glyma01g39480	Glyma01g39480	Gm01:51407024-51411165	ws82-0	ws82-14	NOTEST	0.108352	0.147158	0.441642	-0.443524	0.657386	1	no
Glyma01g39490	Glyma01g39490	Glyma01g39490	Gm01:51412886-51422885	ws82-0	ws82-14	OK	1.27573	1.45518	0.189872	-0.352643	0.724356	0.964988	no
Glyma01g39500	Glyma01g39500	Glyma01g39500	Gm01:51428871-51431363	ws82-0	ws82-14	OK	46.1906	30.1491	-0.615484	1.35699	0.174785	0.622192	no
Glyma01g39510	Glyma01g39510	Glyma01g39510	Gm01:51431925-51439061	ws82-0	ws82-14	OK	1.0825	1.32633	0.293069	-0.503196	0.614827	0.935092	no
Glyma01g39520	Glyma01g39520	Glyma01g39520	Gm01:51456457-51460406	ws82-0	ws82-14	OK	6.55907	6.79962	0.0519627	-0.101289	0.919321	0.993204	no
Glyma01g39530	Glyma01g39530	Glyma01g39530	Gm01:51483951-51489283	ws82-0	ws82-14	OK	209.173	291.026	0.476454	-0.878158	0.379858	0.83487	no
Glyma01g39540	Glyma01g39540	Glyma01g39540	Gm01:51490230-51491823	ws82-0	ws82-14	OK	29.1193	31.0971	0.0948032	-0.209886	0.833757	0.981105	no
Glyma01g39560	Glyma01g39560	Glyma01g39560	Gm01:51508290-51512259	ws82-0	ws82-14	OK	10.1806	6.2468	-0.704632	1.40172	0.160999	0.6012	no
Glyma01g39570	Glyma01g39570	Glyma01g39570	Gm01:51516172-51517312	ws82-0	ws82-14	OK	0.483567	0.296093	-0.707664	0.808364	0.418881	0.858705	no
Glyma01g39580	Glyma01g39580	Glyma01g39580	Gm01:51518038-51522362	ws82-0	ws82-14	OK	19.7503	17.1985	-0.199585	0.449155	0.65332	0.946814	no
Glyma01g39590	Glyma01g39590	Glyma01g39590	Gm01:51527348-51528891	ws82-0	ws82-14	OK	0.501346	1.60827	1.68164	-2.36316	0.0181197	0.174649	no
Glyma01g39600	Glyma01g39600	Glyma01g39600	Gm01:51531989-51534998	ws82-0	ws82-14	OK	10.3964	6.64001	-0.646823	1.35659	0.174911	0.622359	no
Glyma01g39610	Glyma01g39610	Glyma01g39610	Gm01:51545785-51549819	ws82-0	ws82-14	OK	4.06654	5.25132	0.36888	-0.805546	0.420505	0.859388	no
Glyma01g39630	Glyma01g39630	Glyma01g39630	Gm01:51555027-51556605	ws82-0	ws82-14	OK	0.33145	0.51183	0.626874	-0.760009	0.447249	0.872676	no
Glyma01g39640	Glyma01g39640	Glyma01g39640	Gm01:51557943-51560354	ws82-0	ws82-14	OK	10.0937	9.44232	-0.0962392	0.206103	0.83671	0.981185	no
Glyma01g39650	Glyma01g39650	Glyma01g39650	Gm01:51565663-51573461	ws82-0	ws82-14	OK	3.13498	3.38166	0.109274	-0.225103	0.821899	0.979472	no
Glyma01g39660	Glyma01g39660	Glyma01g39660	Gm01:51574045-51576407	ws82-0	ws82-14	OK	2.89293	1.29563	-1.15888	2.15607	0.0310781	0.245502	no
Glyma01g39690	Glyma01g39690	Glyma01g39690	Gm01:51579270-51581490	ws82-0	ws82-14	OK	0.123801	0.477189	1.94654	-2.13551	0.032719	0.253145	no
Glyma01g39700	Glyma01g39700	Glyma01g39700	Gm01:51584479-51586969	ws82-0	ws82-14	OK	7.992	5.90127	-0.437531	0.819218	0.412662	0.855293	no
Glyma01g39710	Glyma01g39710	Glyma01g39710	Gm01:51587208-51587971	ws82-0	ws82-14	OK	0.905504	1.23462	0.447271	-0.535336	0.592417	0.928431	no
Glyma01g39720	Glyma01g39720	Glyma01g39720	Gm01:51588563-51590809	ws82-0	ws82-14	NOTEST	0.38588	0.360119	-0.0996771	0.122051	0.902858	1	no
Glyma01g39740	Glyma01g39740	Glyma01g39740	Gm01:51613142-51614901	ws82-0	ws82-14	OK	35.3844	37.2454	0.0739495	-0.160274	0.872665	0.986638	no
Glyma01g39750	Glyma01g39750	Glyma01g39750	Gm01:51624486-51625983	ws82-0	ws82-14	OK	1.06434	0.57621	-0.885296	0.954414	0.339874	0.807848	no
Glyma01g39760	Glyma01g39760	Glyma01g39760	Gm01:51627630-51629200	ws82-0	ws82-14	NOTEST	0.241111	0.0382997	-2.65429	1.64817	0.099317	1	no
Glyma01g39770	Glyma01g39770	Glyma01g39770	Gm01:51633199-51634269	ws82-0	ws82-14	OK	4.84643	4.79661	-0.0149073	0.0251281	0.979953	0.998584	no
Glyma01g39780	Glyma01g39780	Glyma01g39780	Gm01:51645378-51647678	ws82-0	ws82-14	NOTEST	0.0442461	0.173152	1.96842	-1.65378	0.098173	1	no
Glyma01g39790	Glyma01g39790	Glyma01g39790	Gm01:51653322-51656914	ws82-0	ws82-14	OK	9.03332	19.7049	1.12523	-2.5164	0.0118559	0.132288	no
Glyma01g39800	Glyma01g39800	Glyma01g39800	Gm01:51659391-51665037	ws82-0	ws82-14	OK	2.53224	1.48606	-0.768924	1.36662	0.171745	0.616746	no
Glyma01g39810	Glyma01g39810	Glyma01g39810	Gm01:51668222-51670161	ws82-0	ws82-14	OK	42.3985	58.1202	0.455027	-0.988107	0.3231	0.794561	no
Glyma01g39820	Glyma01g39820	Glyma01g39820	Gm01:51675929-51677501	ws82-0	ws82-14	NOTEST	0	0	0	0	1	1	no
Glyma01g39830	Glyma01g39830	Glyma01g39830	Gm01:51679882-51690594	ws82-0	ws82-14	OK	5.35445	3.00188	-0.834875	1.76628	0.0773495	0.415672	no
Glyma01g39850	Glyma01g39850	Glyma01g39850	Gm01:51698415-51700257	ws82-0	ws82-14	OK	54.7958	58.9787	0.106128	-0.229377	0.818576	0.979116	no
Glyma01g39860	Glyma01g39860	Glyma01g39860	Gm01:51704330-51708072	ws82-0	ws82-14	OK	3.83985	1.97586	-0.958571	1.72238	0.085	0.434214	no
Glyma01g39870	Glyma01g39870	Glyma01g39870	Gm01:51714716-51716494	ws82-0	ws82-14	NOTEST	0	0.112471	1.79769e+308	1.79769e+308	0.025956	1	no
Glyma01g39880	Glyma01g39880	Glyma01g39880	Gm01:51721226-51730602	ws82-0	ws82-14	OK	0.66242	0.317548	-1.06077	0.318485	0.750117	0.969309	no
Glyma01g39890	Glyma01g39890	Glyma01g39890	Gm01:51721226-51730602	ws82-0	ws82-14	OK	34.7962	29.8544	-0.220985	0.481114	0.630435	0.940978	no
Glyma01g39900	Glyma01g39900	Glyma01g39900	Gm01:51730921-51747255	ws82-0	ws82-14	NOTEST	0	0.0503601	1.79769e+308	1.79769e+308	0.346316	1	no
Glyma01g39910	Glyma01g39910	Glyma01g39910	Gm01:51730921-51747255	ws82-0	ws82-14	OK	1.00164	1.88612	0.913055	-1.16181	0.245314	0.718626	no
Glyma01g39920	Glyma01g39920	Glyma01g39920	Gm01:51750715-51754579	ws82-0	ws82-14	OK	1.85851	2.08841	0.168254	-0.236445	0.813087	0.978544	no
Glyma01g39935	Glyma01g39935	Glyma01g39935	Gm01:51755461-51757387	ws82-0	ws82-14	OK	21.1856	19.5877	-0.113137	0.253136	0.800163	0.976114	no
Glyma01g39950	Glyma01g39950	Glyma01g39950	Gm01:51758052-51764933	ws82-0	ws82-14	OK	15.4939	28.0121	0.854345	-1.89644	0.0579015	0.353558	no
Glyma01g39960	Glyma01g39960	Glyma01g39960	Gm01:51768697-51773656	ws82-0	ws82-14	OK	10.7118	9.28862	-0.205658	0.463433	0.643054	0.944594	no
Glyma01g39970	Glyma01g39970	Glyma01g39970	Gm01:51778756-51782898	ws82-0	ws82-14	OK	12.6178	10.0088	-0.334191	0.752376	0.451825	0.875073	no
Glyma01g39981	Glyma01g39981	Glyma01g39981	Gm01:51784287-51787179	ws82-0	ws82-14	OK	3.81634	4.00072	0.0680694	-0.107536	0.914364	0.993064	no
Glyma01g39990	Glyma01g39990	Glyma01g39990	Gm01:51795376-51797766	ws82-0	ws82-14	OK	0.453558	5.60039	3.62617	-5.42193	5.89597e-08	8.60812e-06	yes
Glyma01g40010	Glyma01g40010	Glyma01g40010	Gm01:51813387-51815770	ws82-0	ws82-14	OK	16.1532	2.57844	-2.64725	5.50617	3.66718e-08	5.82191e-06	yes
Glyma01g40030	Glyma01g40030	Glyma01g40030	Gm01:51830579-51838128	ws82-0	ws82-14	OK	3.43386	4.40033	0.357778	-0.291758	0.770472	0.971975	no
Glyma01g40041	Glyma01g40041	Glyma01g40041	Gm01:51830579-51838128	ws82-0	ws82-14	OK	1.6155	1.09834	-0.556659	0.885522	0.375875	0.832612	no
Glyma01g40050	Glyma01g40050	Glyma01g40050	Gm01:51861767-51863943	ws82-0	ws82-14	OK	1.00922	0.150481	-2.74559	3.36462	0.00076649	0.0192825	yes
Glyma01g40060	Glyma01g40060	Glyma01g40060	Gm01:51873281-51875272	ws82-0	ws82-14	NOTEST	0	0.0937206	1.79769e+308	1.79769e+308	0.0441598	1	no
Glyma01g40080	Glyma01g40080	Glyma01g40080	Gm01:51889805-51895295	ws82-0	ws82-14	OK	3.54078	2.95548	-0.260678	0.574478	0.565644	0.91958	no
Glyma01g40090	Glyma01g40090	Glyma01g40090	Gm01:51899586-51905304	ws82-0	ws82-14	OK	0.618308	2.29266	1.89062	-2.51002	0.0120724	0.133952	no
Glyma01g40100	Glyma01g40100	Glyma01g40100	Gm01:51910087-51912612	ws82-0	ws82-14	NOTEST	0.0311786	0.0546007	0.808361	-0.458575	0.646539	1	no
Glyma01g40110	Glyma01g40110	Glyma01g40110	Gm01:51918737-51926979	ws82-0	ws82-14	NOTEST	0.0392039	0.0605738	0.627698	-0.527686	0.597717	1	no
Glyma01g40130	Glyma01g40130	Glyma01g40130	Gm01:51926992-51932894	ws82-0	ws82-14	OK	9.2218	13.8205	0.583694	-1.29303	0.196002	0.655088	no
Glyma01g40140	Glyma01g40140	Glyma01g40140	Gm01:51939465-51943260	ws82-0	ws82-14	OK	15.595	21.7148	0.477596	-1.07419	0.282737	0.7573	no
Glyma01g40150	Glyma01g40150	Glyma01g40150	Gm01:51946620-51947536	ws82-0	ws82-14	OK	39.8166	32.6548	-0.286074	0.642211	0.520736	0.901346	no
Glyma01g40161	Glyma01g40161	Glyma01g40161	Gm01:51948401-51952638	ws82-0	ws82-14	OK	0.607681	0.918409	0.595822	-0.858152	0.390809	0.841989	no
Glyma01g40170	Glyma01g40170	Glyma01g40170	Gm01:51956944-51961922	ws82-0	ws82-14	OK	3.9332	4.13727	0.0729747	-0.155314	0.876574	0.987352	no
Glyma01g40180	Glyma01g40180	Glyma01g40180	Gm01:51965657-51969274	ws82-0	ws82-14	OK	3.17453	4.0846	0.363653	-0.760573	0.446912	0.872577	no
Glyma01g40190	Glyma01g40190	Glyma01g40190	Gm01:51969918-51974115	ws82-0	ws82-14	OK	2.09766	2.10356	0.00405119	-0.0075822	0.99395	0.999334	no
[truncated: 52,176 more rows]
