# Supplementary material for: Overexpression of a Cinnamyl Alcohol Dehydrogenase-Coding Gene, GsCAD1, from Wild Soybean Enhances Resistance to Soybean Mosaic Virus
Source: MDPI journal article supplement (doi:10.3390/ijms232315206), 2022-12-02
Supplement: s1 [file s1 › Table S5 R-1-0D-vs-7D.xlsx]

## Sheet: Sheet1
test_id	gene_id	gene	locus	sample_1	sample_2	status	value_1	value_2	log2(fold_change)	test_stat	p_value	q_value	significant
Glyma0002s50	Glyma0002s50	Glyma0002s50	Gm02:2248-17672	14-7-0	2014-07-07	OK	2.02454	1.87393	-0.111526	0.183259	0.854595	0.966912	no
Glyma0003s50	Glyma0003s50	Glyma0003s50	Gm03:8648-28244	14-7-0	2014-07-07	OK	4.29734	7.77274	0.854981	-1.34885	0.177386	0.545979	no
Glyma0005s50	Glyma0005s50	Glyma0005s50	Gm05:16184-21667	14-7-0	2014-07-07	NOTEST	0.50793	0.384058	-0.403308	0.351298	0.725365	1	no
Glyma0006s50	Glyma0006s50	Glyma0006s50	Gm06:1757-15096	14-7-0	2014-07-07	OK	5.72242	5.27872	-0.116437	0.189283	0.849871	0.965236	no
Glyma0007s50	Glyma0007s50	Glyma0007s50	Gm07:1209-3554	14-7-0	2014-07-07	NOTEST	0	0	0	0	1	1	no
Glyma0010s50	Glyma0010s50	Glyma0010s50	Gm10:10493-13224	14-7-0	2014-07-07	NOTEST	0.00997625	0.0242352	1.28054	-0.261129	0.793993	1	no
Glyma0011s50	Glyma0011s50	Glyma0011s50	Gm11:1119-5508	14-7-0	2014-07-07	NOTEST	0.22971	0.0314469	-2.86883	1.56855	0.116753	1	no
Glyma0015s50	Glyma0015s50	Glyma0015s50	Gm15:626-2726	14-7-0	2014-07-07	NOTEST	0	0	0	0	1	1	no
Glyma0017s50	Glyma0017s50	Glyma0017s50	Gm17:405-1845	14-7-0	2014-07-07	OK	0.652702	0.228898	-1.51172	0.827436	0.40799	0.779409	no
Glyma0018s50	Glyma0018s50	Glyma0018s50	Gm18:2484-40137	14-7-0	2014-07-07	OK	2.18615	2.26564	0.0515237	-0.0864016	0.931147	0.985235	no
Glyma0021s00410	Glyma0021s00410	Glyma0021s00410	scaffold_21:663659-664067	14-7-0	2014-07-07	NOTEST	0	0	0	0	1	1	no
Glyma0021s00426	Glyma0021s00426	Glyma0021s00426	scaffold_21:684712-690812	14-7-0	2014-07-07	NOTEST	0	0	0	0	1	1	no
Glyma0021s00443	Glyma0021s00443	Glyma0021s00443	scaffold_21:692299-694156	14-7-0	2014-07-07	OK	0	0.634028	1.79769e+308	1.79769e+308	0.0638309	0.317436	no
Glyma0021s00460	Glyma0021s00460	Glyma0021s00460	scaffold_21:716657-721100	14-7-0	2014-07-07	OK	0.856227	0.984135	0.200862	-0.188721	0.850311	0.96541	no
Glyma0022s00200	Glyma0022s00200	Glyma0022s00200	scaffold_22:543542-558386	14-7-0	2014-07-07	NOTEST	0.0609353	0	-1.79769e+308	-1.79769e+308	0.139932	1	no
Glyma0022s00273	Glyma0022s00273	Glyma0022s00273	scaffold_22:561854-563467	14-7-0	2014-07-07	NOTEST	0	0	0	0	1	1	no
Glyma0022s00346	Glyma0022s00346	Glyma0022s00346	scaffold_22:563726-567494	14-7-0	2014-07-07	NOTEST	0	0	0	0	1	1	no
Glyma0022s00420	Glyma0022s00420	Glyma0022s00420	scaffold_22:722866-725638	14-7-0	2014-07-07	OK	6.68723	5.43762	-0.298432	0.492817	0.622142	0.898447	no
Glyma0022s00430	Glyma0022s00430	Glyma0022s00430	scaffold_22:728729-731634	14-7-0	2014-07-07	NOTEST	0	0.145062	1.79769e+308	1.79769e+308	0.118659	1	no
Glyma0022s00443	Glyma0022s00443	Glyma0022s00443	scaffold_22:800491-802362	14-7-0	2014-07-07	NOTEST	0	0	0	0	1	1	no
Glyma0022s00456	Glyma0022s00456	Glyma0022s00456	scaffold_22:942964-948274	14-7-0	2014-07-07	OK	4.36251	4.29223	-0.0234318	0.0226123	0.98196	0.995948	no
Glyma0022s00470	Glyma0022s00470	Glyma0022s00470	scaffold_22:942964-948274	14-7-0	2014-07-07	OK	0.518635	0.739449	0.511729	-0.122708	0.902339	0.978342	no
Glyma0022s00480	Glyma0022s00480	Glyma0022s00480	scaffold_22:952859-956925	14-7-0	2014-07-07	OK	0.780789	0.735782	-0.0856528	0.0889222	0.929144	0.98481	no
Glyma0023s00410	Glyma0023s00410	Glyma0023s00410	scaffold_23:476540-479148	14-7-0	2014-07-07	OK	1.89084	1.02476	-0.883749	1.05503	0.29141	0.685044	no
Glyma0023s00515	Glyma0023s00515	Glyma0023s00515	scaffold_23:689759-693471	14-7-0	2014-07-07	OK	0.755188	0.637422	-0.244587	0.248577	0.803688	0.952983	no
Glyma0023s00620	Glyma0023s00620	Glyma0023s00620	scaffold_23:694208-709536	14-7-0	2014-07-07	OK	6.10176	2.97558	-1.03606	1.32472	0.185263	0.554772	no
Glyma0023s00670	Glyma0023s00670	Glyma0023s00670	scaffold_23:882926-883789	14-7-0	2014-07-07	NOTEST	0	0	0	0	1	1	no
Glyma0024s00230	Glyma0024s00230	Glyma0024s00230	scaffold_24:8124-13007	14-7-0	2014-07-07	OK	2.91081	2.81245	-0.0495902	0.062056	0.950518	0.990263	no
Glyma0024s00245	Glyma0024s00245	Glyma0024s00245	scaffold_24:191608-197085	14-7-0	2014-07-07	NOTEST	0	0	0	0	1	1	no
Glyma0024s00260	Glyma0024s00260	Glyma0024s00260	scaffold_24:201620-211808	14-7-0	2014-07-07	OK	3.26259	4.53385	0.474719	-0.605765	0.544671	0.861142	no
Glyma0028s00210	Glyma0028s00210	Glyma0028s00210	scaffold_28:233807-247417	14-7-0	2014-07-07	OK	7.97543	5.65539	-0.495935	0.836674	0.402776	0.776369	no
Glyma0028s00260	Glyma0028s00260	Glyma0028s00260	scaffold_28:250538-253655	14-7-0	2014-07-07	NOTEST	0	0	0	0	1	1	no
Glyma0041s00210	Glyma0041s00210	Glyma0041s00210	scaffold_41:27189-31640	14-7-0	2014-07-07	OK	2.1581	5.16913	1.26016	-2.007	0.0447495	0.25789	no
Glyma0041s00225	Glyma0041s00225	Glyma0041s00225	scaffold_41:41035-42513	14-7-0	2014-07-07	NOTEST	0	0	0	0	1	1	no
Glyma0041s00240	Glyma0041s00240	Glyma0041s00240	scaffold_41:45959-49258	14-7-0	2014-07-07	OK	0.0804523	2.17489	4.75666	-3.2452	0.00117368	0.0251233	yes
Glyma0041s00260	Glyma0041s00260	Glyma0041s00260	scaffold_41:61732-66813	14-7-0	2014-07-07	OK	1.62853	5.09404	1.64524	-2.18125	0.0291646	0.203297	no
Glyma0041s00271	Glyma0041s00271	Glyma0041s00271	scaffold_41:70024-73638	14-7-0	2014-07-07	OK	1.7106	1.42596	-0.262571	0.265173	0.790876	0.950172	no
Glyma0041s00280	Glyma0041s00280	Glyma0041s00280	scaffold_41:74056-78241	14-7-0	2014-07-07	OK	2.60569	5.14098	0.980379	-1.34431	0.17885	0.547299	no
Glyma0041s00290	Glyma0041s00290	Glyma0041s00290	scaffold_41:85372-94695	14-7-0	2014-07-07	OK	3.67822	1.48008	-1.31333	1.9092	0.0562358	0.294673	no
Glyma0041s00300	Glyma0041s00300	Glyma0041s00300	scaffold_41:96315-98827	14-7-0	2014-07-07	OK	12.1769	19.961	0.713031	-1.1889	0.234477	0.618805	no
Glyma0041s00310	Glyma0041s00310	Glyma0041s00310	scaffold_41:111899-114096	14-7-0	2014-07-07	NOTEST	0.108035	0.406882	1.91311	-1.44993	0.147077	1	no
Glyma0041s00331	Glyma0041s00331	Glyma0041s00331	scaffold_41:122453-123227	14-7-0	2014-07-07	NOTEST	0	0	0	0	1	1	no
Glyma0041s00350	Glyma0041s00350	Glyma0041s00350	scaffold_41:149673-152360	14-7-0	2014-07-07	NOTEST	0	0.0475255	1.79769e+308	1.79769e+308	0.180329	1	no
Glyma0041s00360	Glyma0041s00360	Glyma0041s00360	scaffold_41:165449-171887	14-7-0	2014-07-07	NOTEST	0	0	0	0	1	1	no
Glyma0041s50	Glyma0041s50	Glyma0041s50	scaffold_41:4320-9458	14-7-0	2014-07-07	NOTEST	0.109688	0.0487477	-1.17	0.938708	0.347881	1	no
Glyma0042s100	Glyma0042s100	Glyma0042s100	scaffold_42:281628-284115	14-7-0	2014-07-07	OK	0.609452	1.20278	0.980792	-0.832551	0.405098	0.777556	no
Glyma0042s50	Glyma0042s50	Glyma0042s50	scaffold_42:265872-271658	14-7-0	2014-07-07	NOTEST	0	0	0	0	1	1	no
Glyma0048s00220	Glyma0048s00220	Glyma0048s00220	scaffold_48:756-13042	14-7-0	2014-07-07	NOTEST	0	0	0	0	1	1	no
Glyma0048s00230	Glyma0048s00230	Glyma0048s00230	scaffold_48:13316-18869	14-7-0	2014-07-07	OK	2.72365	0.723966	-1.91155	0.278437	0.780677	0.947747	no
Glyma0048s00240	Glyma0048s00240	Glyma0048s00240	scaffold_48:13316-18869	14-7-0	2014-07-07	OK	1.9281	4.7702	1.30687	-1.94248	0.0520786	0.282648	no
Glyma0048s00250	Glyma0048s00250	Glyma0048s00250	scaffold_48:24012-27245	14-7-0	2014-07-07	OK	25.2087	49.5193	0.974072	-1.60348	0.108829	0.425964	no
Glyma0048s00260	Glyma0048s00260	Glyma0048s00260	scaffold_48:30256-31906	14-7-0	2014-07-07	OK	0.622098	1.24651	1.00268	-1.07446	0.282615	0.675528	no
Glyma0048s00270	Glyma0048s00270	Glyma0048s00270	scaffold_48:32191-38154	14-7-0	2014-07-07	OK	14.5129	11.0208	-0.397112	0.670353	0.502633	0.837785	no
Glyma0048s00280	Glyma0048s00280	Glyma0048s00280	scaffold_48:41005-46815	14-7-0	2014-07-07	OK	4.02639	4.57683	0.184864	-0.242403	0.808468	0.954639	no
Glyma0048s00290	Glyma0048s00290	Glyma0048s00290	scaffold_48:51746-58457	14-7-0	2014-07-07	OK	13.421	14.3684	0.0984073	-0.158052	0.874416	0.97223	no
Glyma0048s00300	Glyma0048s00300	Glyma0048s00300	scaffold_48:62047-65487	14-7-0	2014-07-07	OK	36.1162	34.9835	-0.0459722	0.0655755	0.947716	0.989781	no
Glyma0048s00305	Glyma0048s00305	Glyma0048s00305	scaffold_48:62047-65487	14-7-0	2014-07-07	OK	3.95093	4.85618	0.297629	-0.125826	0.89987	0.977979	no
Glyma0048s00310	Glyma0048s00310	Glyma0048s00310	scaffold_48:73905-75284	14-7-0	2014-07-07	NOTEST	0	0.140484	1.79769e+308	1.79769e+308	0.0539625	1	no
Glyma0048s00320	Glyma0048s00320	Glyma0048s00320	scaffold_48:78264-89175	14-7-0	2014-07-07	OK	1.94796	2.00075	0.038573	-0.0496922	0.960368	0.992616	no
Glyma0048s00330	Glyma0048s00330	Glyma0048s00330	scaffold_48:92831-93821	14-7-0	2014-07-07	OK	5.45304	11.7501	1.10753	-1.63655	0.101725	0.410223	no
Glyma0048s00340	Glyma0048s00340	Glyma0048s00340	scaffold_48:93959-105291	14-7-0	2014-07-07	OK	3.39813	3.85035	0.180247	-0.304725	0.760576	0.941673	no
Glyma0048s00350	Glyma0048s00350	Glyma0048s00350	scaffold_48:115208-118892	14-7-0	2014-07-07	NOTEST	0	0.037755	1.79769e+308	1.79769e+308	0.180329	1	no
Glyma0048s50	Glyma0048s50	Glyma0048s50	scaffold_48:756-13042	14-7-0	2014-07-07	OK	1.43753	0.843514	-0.769109	0.939375	0.347538	0.735905	no
Glyma0053s100	Glyma0053s100	Glyma0053s100	scaffold_53:40277-44576	14-7-0	2014-07-07	NOTEST	0	0	0	0	1	1	no
Glyma0053s150	Glyma0053s150	Glyma0053s150	scaffold_53:60537-64721	14-7-0	2014-07-07	NOTEST	0	0	0	0	1	1	no
Glyma0053s200	Glyma0053s200	Glyma0053s200	scaffold_53:96299-97317	14-7-0	2014-07-07	NOTEST	0	0	0	0	1	1	no
Glyma0053s50	Glyma0053s50	Glyma0053s50	scaffold_53:1663-6177	14-7-0	2014-07-07	NOTEST	0	0	0	0	1	1	no
Glyma0057s100	Glyma0057s100	Glyma0057s100	scaffold_57:113347-115364	14-7-0	2014-07-07	OK	0.833514	0.260877	-1.67584	1.03868	0.298954	0.692346	no
Glyma0057s50	Glyma0057s50	Glyma0057s50	scaffold_57:98459-99986	14-7-0	2014-07-07	NOTEST	0	0	0	0	1	1	no
Glyma0060s00220	Glyma0060s00220	Glyma0060s00220	scaffold_60:12548-13243	14-7-0	2014-07-07	NOTEST	0	0	0	0	1	1	no
Glyma0060s00320	Glyma0060s00320	Glyma0060s00320	scaffold_60:67387-68707	14-7-0	2014-07-07	NOTEST	0	0	0	0	1	1	no
Glyma0060s00370	Glyma0060s00370	Glyma0060s00370	scaffold_60:104356-106210	14-7-0	2014-07-07	NOTEST	0	0	0	0	1	1	no
Glyma0066s50	Glyma0066s50	Glyma0066s50	scaffold_66:161914-164286	14-7-0	2014-07-07	NOTEST	0	0	0	0	1	1	no
Glyma0067s50	Glyma0067s50	Glyma0067s50	scaffold_67:44433-45302	14-7-0	2014-07-07	NOTEST	0	0	0	0	1	1	no
Glyma0070s50	Glyma0070s50	Glyma0070s50	scaffold_70:35574-40055	14-7-0	2014-07-07	OK	0.485859	1.35646	1.48124	-1.45437	0.145845	0.497308	no
Glyma0079s00200	Glyma0079s00200	Glyma0079s00200	scaffold_79:9482-9737	14-7-0	2014-07-07	NOTEST	0	0	0	0	1	1	no
Glyma0079s00210	Glyma0079s00210	Glyma0079s00210	scaffold_79:16304-17051	14-7-0	2014-07-07	OK	0.138859	1.6251	3.54884	-2.34178	0.0191922	0.158447	no
Glyma0079s00220	Glyma0079s00220	Glyma0079s00220	scaffold_79:17736-18009	14-7-0	2014-07-07	NOTEST	0	0	0	0	1	1	no
Glyma0079s00230	Glyma0079s00230	Glyma0079s00230	scaffold_79:18723-19596	14-7-0	2014-07-07	NOTEST	0	0.185347	1.79769e+308	1.79769e+308	0.0980491	1	no
Glyma0079s00240	Glyma0079s00240	Glyma0079s00240	scaffold_79:20660-20912	14-7-0	2014-07-07	NOTEST	0	0	0	0	1	1	no
Glyma0079s00250	Glyma0079s00250	Glyma0079s00250	scaffold_79:20961-21240	14-7-0	2014-07-07	OK	0.800573	0	-1.79769e+308	-1.79769e+308	0.139932	0.486691	no
Glyma0079s00261	Glyma0079s00261	Glyma0079s00261	scaffold_79:22053-22326	14-7-0	2014-07-07	NOTEST	0	0	0	0	1	1	no
Glyma0079s00270	Glyma0079s00270	Glyma0079s00270	scaffold_79:25288-26862	14-7-0	2014-07-07	NOTEST	0.136211	0	-1.79769e+308	-1.79769e+308	0.066394	1	no
Glyma0079s00280	Glyma0079s00280	Glyma0079s00280	scaffold_79:27077-28537	14-7-0	2014-07-07	NOTEST	0	0	0	0	1	1	no
Glyma0079s00290	Glyma0079s00290	Glyma0079s00290	scaffold_79:30187-34025	14-7-0	2014-07-07	NOTEST	0.0479288	0.0982458	1.0355	-0.8008	0.423247	1	no
Glyma0079s00295	Glyma0079s00295	Glyma0079s00295	scaffold_79:54681-55767	14-7-0	2014-07-07	NOTEST	0.0514325	0	-1.79769e+308	-1.79769e+308	0.222399	1	no
Glyma0079s00300	Glyma0079s00300	Glyma0079s00300	scaffold_79:56320-57461	14-7-0	2014-07-07	NOTEST	0	0	0	0	1	1	no
Glyma0079s00311	Glyma0079s00311	Glyma0079s00311	scaffold_79:123336-123591	14-7-0	2014-07-07	OK	0	0.629844	1.79769e+308	1.79769e+308	0.298832	0.692248	no
Glyma0079s00320	Glyma0079s00320	Glyma0079s00320	scaffold_79:127744-128017	14-7-0	2014-07-07	NOTEST	0	0.430005	1.79769e+308	1.79769e+308	0.298832	1	no
Glyma0079s00330	Glyma0079s00330	Glyma0079s00330	scaffold_79:128776-129055	14-7-0	2014-07-07	OK	0.269204	1.27001	2.23807	-0.833197	0.404734	0.777279	no
Glyma0079s00340	Glyma0079s00340	Glyma0079s00340	scaffold_79:161645-161951	14-7-0	2014-07-07	NOTEST	0	0	0	0	1	1	no
Glyma0079s00350	Glyma0079s00350	Glyma0079s00350	scaffold_79:164291-164540	14-7-0	2014-07-07	OK	0	0.626876	1.79769e+308	1.79769e+308	0.298832	0.692248	no
Glyma0079s00360	Glyma0079s00360	Glyma0079s00360	scaffold_79:165133-166200	14-7-0	2014-07-07	OK	0.0828261	0.793686	3.26041	-1.97806	0.0479214	0.268045	no
Glyma0079s00370	Glyma0079s00370	Glyma0079s00370	scaffold_79:167220-167502	14-7-0	2014-07-07	OK	0	0.858868	1.79769e+308	1.79769e+308	0.214284	0.594615	no
Glyma0080s50	Glyma0080s50	Glyma0080s50	scaffold_80:33970-43733	14-7-0	2014-07-07	NOTEST	0.0550314	0.0932767	0.761262	-0.437492	0.661755	1	no
Glyma0084s00210	Glyma0084s00210	Glyma0084s00210	scaffold_84:12274-20446	14-7-0	2014-07-07	OK	51.5096	121.887	1.24263	-1.90445	0.0568512	0.296226	no
Glyma0084s00230	Glyma0084s00230	Glyma0084s00230	scaffold_84:53420-54224	14-7-0	2014-07-07	NOTEST	0	0	0	0	1	1	no
Glyma0086s00200	Glyma0086s00200	Glyma0086s00200	scaffold_86:18942-19924	14-7-0	2014-07-07	NOTEST	0	0	0	0	1	1	no
Glyma0086s00250	Glyma0086s00250	Glyma0086s00250	scaffold_86:40393-43241	14-7-0	2014-07-07	NOTEST	0	0	0	0	1	1	no
Glyma0086s00300	Glyma0086s00300	Glyma0086s00300	scaffold_86:91106-93419	14-7-0	2014-07-07	NOTEST	0	0	0	0	1	1	no
Glyma0090s00200	Glyma0090s00200	Glyma0090s00200	scaffold_90:4631-8816	14-7-0	2014-07-07	NOTEST	0.168863	0.187679	0.152413	-0.142878	0.886386	1	no
Glyma0090s00250	Glyma0090s00250	Glyma0090s00250	scaffold_90:22827-24762	14-7-0	2014-07-07	NOTEST	0	0.0408745	1.79769e+308	1.79769e+308	0.180329	1	no
Glyma0090s00300	Glyma0090s00300	Glyma0090s00300	scaffold_90:24885-25615	14-7-0	2014-07-07	NOTEST	0.345765	0.195328	-0.82389	0.429533	0.667535	1	no
Glyma0090s00350	Glyma0090s00350	Glyma0090s00350	scaffold_90:44125-48952	14-7-0	2014-07-07	NOTEST	0.0569264	0.0967446	0.765083	-0.62795	0.530037	1	no
Glyma0091s00230	Glyma0091s00230	Glyma0091s00230	scaffold_91:29255-30661	14-7-0	2014-07-07	NOTEST	0	0	0	0	1	1	no
Glyma0092s00200	Glyma0092s00200	Glyma0092s00200	scaffold_92:4798-6418	14-7-0	2014-07-07	OK	0.129089	0.898429	2.79904	-2.38658	0.0170061	0.147992	no
Glyma0092s00210	Glyma0092s00210	Glyma0092s00210	scaffold_92:9477-13080	14-7-0	2014-07-07	OK	5.19663	5.08976	-0.0299771	0.0385027	0.969287	0.994291	no
Glyma0092s00230	Glyma0092s00230	Glyma0092s00230	scaffold_92:31216-33044	14-7-0	2014-07-07	OK	33.4943	23.9775	-0.482234	0.801718	0.422716	0.790151	no
Glyma0092s00240	Glyma0092s00240	Glyma0092s00240	scaffold_92:54198-55797	14-7-0	2014-07-07	OK	12.3268	28.3285	1.20046	-1.99778	0.0457405	0.260855	no
Glyma0096s100	Glyma0096s100	Glyma0096s100	scaffold_96:83938-84651	14-7-0	2014-07-07	NOTEST	0	0	0	0	1	1	no
Glyma0096s50	Glyma0096s50	Glyma0096s50	scaffold_96:24926-29013	14-7-0	2014-07-07	NOTEST	0	0	0	0	1	1	no
Glyma0101s00200	Glyma0101s00200	Glyma0101s00200	scaffold_101:409-679	14-7-0	2014-07-07	NOTEST	0	0	0	0	1	1	no
Glyma0101s00210	Glyma0101s00210	Glyma0101s00210	scaffold_101:1190-2295	14-7-0	2014-07-07	NOTEST	0	0	0	0	1	1	no
Glyma0101s00230	Glyma0101s00230	Glyma0101s00230	scaffold_101:16731-19812	14-7-0	2014-07-07	NOTEST	0	0	0	0	1	1	no
Glyma0101s00241	Glyma0101s00241	Glyma0101s00241	scaffold_101:20750-20975	14-7-0	2014-07-07	NOTEST	0	0	0	0	1	1	no
Glyma0101s00251	Glyma0101s00251	Glyma0101s00251	scaffold_101:42209-42999	14-7-0	2014-07-07	NOTEST	0	0	0	0	1	1	no
Glyma0101s00260	Glyma0101s00260	Glyma0101s00260	scaffold_101:49116-50221	14-7-0	2014-07-07	NOTEST	0	0	0	0	1	1	no
Glyma0103s100	Glyma0103s100	Glyma0103s100	scaffold_103:35985-36595	14-7-0	2014-07-07	NOTEST	0.0531999	0.375836	2.82061	-1.1199	0.262757	1	no
Glyma0103s50	Glyma0103s50	Glyma0103s50	scaffold_103:19207-24805	14-7-0	2014-07-07	NOTEST	0.132841	0.0280763	-2.24227	0.50102	0.616357	1	no
Glyma0120s50	Glyma0120s50	Glyma0120s50	scaffold_120:55294-60491	14-7-0	2014-07-07	NOTEST	0	0	0	0	1	1	no
Glyma0121s00200	Glyma0121s00200	Glyma0121s00200	scaffold_121:11730-14225	14-7-0	2014-07-07	NOTEST	0	0	0	0	1	1	no
Glyma0121s00230	Glyma0121s00230	Glyma0121s00230	scaffold_121:28095-29760	14-7-0	2014-07-07	NOTEST	0	0	0	0	1	1	no
Glyma0121s00240	Glyma0121s00240	Glyma0121s00240	scaffold_121:38140-41744	14-7-0	2014-07-07	NOTEST	0.00467078	0.0215886	2.20854	-0.221105	0.825011	1	no
Glyma0128s50	Glyma0128s50	Glyma0128s50	scaffold_128:8755-9643	14-7-0	2014-07-07	NOTEST	0	0	0	0	1	1	no
Glyma0146s00210	Glyma0146s00210	Glyma0146s00210	scaffold_146:13454-14636	14-7-0	2014-07-07	NOTEST	0	0	0	0	1	1	no
Glyma0165s00200	Glyma0165s00200	Glyma0165s00200	scaffold_165:18150-20209	14-7-0	2014-07-07	NOTEST	0.0213628	0	-1.79769e+308	-1.79769e+308	0.294491	1	no
Glyma0165s50	Glyma0165s50	Glyma0165s50	scaffold_165:12356-14234	14-7-0	2014-07-07	NOTEST	0	0	0	0	1	1	no
Glyma0169s00200	Glyma0169s00200	Glyma0169s00200	scaffold_169:6036-7668	14-7-0	2014-07-07	OK	81.1546	75.1778	-0.110366	0.172553	0.863003	0.968507	no
Glyma0169s00210	Glyma0169s00210	Glyma0169s00210	scaffold_169:10271-14284	14-7-0	2014-07-07	OK	85.9573	66.6969	-0.366002	0.547092	0.584315	0.882185	no
Glyma0174s50	Glyma0174s50	Glyma0174s50	scaffold_174:28-832	14-7-0	2014-07-07	NOTEST	0.317932	0.147445	-1.10854	0.600135	0.548416	1	no
Glyma0175s50	Glyma0175s50	Glyma0175s50	scaffold_175:15261-16399	14-7-0	2014-07-07	NOTEST	0	0	0	0	1	1	no
Glyma0196s00210	Glyma0196s00210	Glyma0196s00210	scaffold_196:12292-15573	14-7-0	2014-07-07	NOTEST	0.0561854	0.038549	-0.543502	0.345607	0.729638	1	no
Glyma0196s130	Glyma0196s130	Glyma0196s130	scaffold_196:9547-9835	14-7-0	2014-07-07	NOTEST	0	0	0	0	1	1	no
Glyma0196s50	Glyma0196s50	Glyma0196s50	scaffold_196:6280-7448	14-7-0	2014-07-07	NOTEST	0	0	0	0	1	1	no
Glyma01g00210	Glyma01g00210	Glyma01g00210	Gm01:27642-27977	14-7-0	2014-07-07	OK	2.63513	7.46942	1.50312	-0.863833	0.38768	0.765815	no
Glyma01g00241	Glyma01g00241	Glyma01g00241	Gm01:28504-30546	14-7-0	2014-07-07	OK	1.31499	0.486166	-1.43553	1.43868	0.150241	0.504554	no
Glyma01g00270	Glyma01g00270	Glyma01g00270	Gm01:51480-61502	14-7-0	2014-07-07	NOTEST	0.152919	0.0450174	-1.76421	0.973778	0.330167	1	no
Glyma01g00280	Glyma01g00280	Glyma01g00280	Gm01:61964-63428	14-7-0	2014-07-07	NOTEST	0	0	0	0	1	1	no
Glyma01g00291	Glyma01g00291	Glyma01g00291	Gm01:69968-71359	14-7-0	2014-07-07	OK	1.36595	0.615528	-1.15001	1.06578	0.286522	0.680018	no
Glyma01g00300	Glyma01g00300	Glyma01g00300	Gm01:90229-96102	14-7-0	2014-07-07	OK	5.83855	3.81972	-0.61214	0.998619	0.317979	0.70946	no
Glyma01g00311	Glyma01g00311	Glyma01g00311	Gm01:111565-114809	14-7-0	2014-07-07	NOTEST	0	0	0	0	1	1	no
Glyma01g00321	Glyma01g00321	Glyma01g00321	Gm01:116191-128024	14-7-0	2014-07-07	OK	3.0542	2.63832	-0.211174	0.327345	0.743407	0.936752	no
Glyma01g00341	Glyma01g00341	Glyma01g00341	Gm01:143352-155722	14-7-0	2014-07-07	OK	0	0.745501	1.79769e+308	1.79769e+308	0.0340686	0.220832	no
Glyma01g00361	Glyma01g00361	Glyma01g00361	Gm01:157174-157917	14-7-0	2014-07-07	NOTEST	0	0.0851221	1.79769e+308	1.79769e+308	0.180329	1	no
Glyma01g00380	Glyma01g00380	Glyma01g00380	Gm01:170678-193544	14-7-0	2014-07-07	OK	2.27101	4.07921	0.844957	-1.31208	0.189494	0.561015	no
Glyma01g00400	Glyma01g00400	Glyma01g00400	Gm01:196374-202050	14-7-0	2014-07-07	OK	7.01074	7.25436	0.049282	-0.061427	0.951019	0.990263	no
Glyma01g00410	Glyma01g00410	Glyma01g00410	Gm01:205593-226050	14-7-0	2014-07-07	OK	24.0605	10.8908	-1.14356	1.79664	0.0723928	0.340055	no
Glyma01g00420	Glyma01g00420	Glyma01g00420	Gm01:205593-226050	14-7-0	2014-07-07	NOTEST	0.198543	0.246347	0.311243	-0.0724903	0.942212	1	no
Glyma01g00430	Glyma01g00430	Glyma01g00430	Gm01:227158-238073	14-7-0	2014-07-07	OK	16.1298	17.9896	0.157435	-0.236337	0.813171	0.955912	no
Glyma01g00440	Glyma01g00440	Glyma01g00440	Gm01:244255-244600	14-7-0	2014-07-07	NOTEST	0	0	0	0	1	1	no
Glyma01g00450	Glyma01g00450	Glyma01g00450	Gm01:247079-274310	14-7-0	2014-07-07	NOTEST	0	0	0	0	1	1	no
Glyma01g00460	Glyma01g00460	Glyma01g00460	Gm01:247079-274310	14-7-0	2014-07-07	OK	2.16015	1.84571	-0.226951	0.246385	0.805384	0.953415	no
Glyma01g00470	Glyma01g00470	Glyma01g00470	Gm01:247079-274310	14-7-0	2014-07-07	OK	5.34876	4.67826	-0.193233	0.245384	0.806159	0.953735	no
Glyma01g00481	Glyma01g00481	Glyma01g00481	Gm01:275569-278576	14-7-0	2014-07-07	NOTEST	0	0.0652595	1.79769e+308	1.79769e+308	0.0638309	1	no
Glyma01g00490	Glyma01g00490	Glyma01g00490	Gm01:281068-285680	14-7-0	2014-07-07	NOTEST	0	0	0	0	1	1	no
Glyma01g00500	Glyma01g00500	Glyma01g00500	Gm01:285991-288741	14-7-0	2014-07-07	OK	78.8103	146.479	0.894242	-1.41641	0.156656	0.51445	no
Glyma01g00510	Glyma01g00510	Glyma01g00510	Gm01:291440-297515	14-7-0	2014-07-07	OK	2.54562	5.04681	0.987353	-1.50889	0.131328	0.472286	no
Glyma01g00520	Glyma01g00520	Glyma01g00520	Gm01:303945-308194	14-7-0	2014-07-07	OK	2.17477	2.81873	0.374181	-0.425273	0.670638	0.914883	no
Glyma01g00530	Glyma01g00530	Glyma01g00530	Gm01:318581-323172	14-7-0	2014-07-07	NOTEST	0	0	0	0	1	1	no
Glyma01g00541	Glyma01g00541	Glyma01g00541	Gm01:329083-331923	14-7-0	2014-07-07	OK	3.66233	10.8061	1.56101	-2.19434	0.0282112	0.199059	no
Glyma01g00551	Glyma01g00551	Glyma01g00551	Gm01:333453-334355	14-7-0	2014-07-07	NOTEST	0	0	0	0	1	1	no
Glyma01g00560	Glyma01g00560	Glyma01g00560	Gm01:335231-337098	14-7-0	2014-07-07	OK	3.60691	7.50788	1.05764	-1.64784	0.0993853	0.405463	no
Glyma01g00570	Glyma01g00570	Glyma01g00570	Gm01:339899-343391	14-7-0	2014-07-07	OK	22.2578	21.0285	-0.0819692	0.138348	0.889966	0.976608	no
Glyma01g00580	Glyma01g00580	Glyma01g00580	Gm01:344017-344620	14-7-0	2014-07-07	NOTEST	0	0	0	0	1	1	no
Glyma01g00590	Glyma01g00590	Glyma01g00590	Gm01:346489-350011	14-7-0	2014-07-07	OK	18.5251	30.7098	0.729216	-1.22006	0.222442	0.605454	no
Glyma01g00600	Glyma01g00600	Glyma01g00600	Gm01:363275-365404	14-7-0	2014-07-07	OK	14.0882	6.41647	-1.13463	1.82791	0.0675632	0.326362	no
Glyma01g00610	Glyma01g00610	Glyma01g00610	Gm01:369322-375842	14-7-0	2014-07-07	OK	12.8825	6.03923	-1.09297	1.34173	0.179685	0.547398	no
Glyma01g00620	Glyma01g00620	Glyma01g00620	Gm01:369322-375842	14-7-0	2014-07-07	NOTEST	0	0.163573	1.79769e+308	1.79769e+308	0.321498	1	no
Glyma01g00640	Glyma01g00640	Glyma01g00640	Gm01:380015-381810	14-7-0	2014-07-07	OK	3.80795	13.6694	1.84386	-2.96186	0.00305788	0.0481518	yes
Glyma01g00660	Glyma01g00660	Glyma01g00660	Gm01:384777-386898	14-7-0	2014-07-07	NOTEST	0	0	0	0	1	1	no
Glyma01g00670	Glyma01g00670	Glyma01g00670	Gm01:387855-391000	14-7-0	2014-07-07	OK	1.71099	2.52316	0.560405	-0.774694	0.438521	0.8	no
Glyma01g00680	Glyma01g00680	Glyma01g00680	Gm01:391564-396978	14-7-0	2014-07-07	OK	2.78641	2.42003	-0.203382	0.276845	0.781899	0.948228	no
Glyma01g00690	Glyma01g00690	Glyma01g00690	Gm01:397383-400581	14-7-0	2014-07-07	OK	4.77964	10.7163	1.16483	-1.55852	0.119111	0.448462	no
Glyma01g00700	Glyma01g00700	Glyma01g00700	Gm01:411261-413277	14-7-0	2014-07-07	NOTEST	0	0	0	0	1	1	no
Glyma01g00710	Glyma01g00710	Glyma01g00710	Gm01:415321-417655	14-7-0	2014-07-07	NOTEST	0	0.164211	1.79769e+308	1.79769e+308	0.0980491	1	no
Glyma01g00720	Glyma01g00720	Glyma01g00720	Gm01:418762-423973	14-7-0	2014-07-07	OK	1.74547	1.71224	-0.0277338	0.0421353	0.966391	0.993998	no
Glyma01g00730	Glyma01g00730	Glyma01g00730	Gm01:425499-427881	14-7-0	2014-07-07	OK	0.906335	1.15753	0.352927	-0.278864	0.780349	0.947658	no
Glyma01g00740	Glyma01g00740	Glyma01g00740	Gm01:429463-430748	14-7-0	2014-07-07	OK	106.573	115.503	0.11609	-0.176153	0.860174	0.967747	no
Glyma01g00750	Glyma01g00750	Glyma01g00750	Gm01:431176-433062	14-7-0	2014-07-07	NOTEST	0.13943	0.3576	1.35881	-1.16115	0.245582	1	no
Glyma01g00760	Glyma01g00760	Glyma01g00760	Gm01:434429-437563	14-7-0	2014-07-07	OK	13.13	16.2124	0.304232	-0.457268	0.647478	0.907589	no
Glyma01g00771	Glyma01g00771	Glyma01g00771	Gm01:438390-439678	14-7-0	2014-07-07	OK	2.66739	9.79686	1.87689	-2.46069	0.0138671	0.131612	no
Glyma01g00780	Glyma01g00780	Glyma01g00780	Gm01:441913-445194	14-7-0	2014-07-07	NOTEST	0.239509	0.588453	1.29685	-1.15794	0.246887	1	no
Glyma01g00790	Glyma01g00790	Glyma01g00790	Gm01:446961-452958	14-7-0	2014-07-07	NOTEST	0	0.0190193	1.79769e+308	1.79769e+308	0.180329	1	no
Glyma01g00805	Glyma01g00805	Glyma01g00805	Gm01:457615-459673	14-7-0	2014-07-07	NOTEST	0	0.0458545	1.79769e+308	1.79769e+308	0.180329	1	no
Glyma01g00820	Glyma01g00820	Glyma01g00820	Gm01:464651-466721	14-7-0	2014-07-07	OK	1.64522	9.52497	2.53344	-3.72018	0.000199082	0.00707665	yes
Glyma01g00840	Glyma01g00840	Glyma01g00840	Gm01:505341-508290	14-7-0	2014-07-07	NOTEST	0	0.103389	1.79769e+308	1.79769e+308	0.118659	1	no
Glyma01g00850	Glyma01g00850	Glyma01g00850	Gm01:512025-517266	14-7-0	2014-07-07	OK	4.36542	3.65782	-0.255138	0.415174	0.678015	0.917319	no
Glyma01g00860	Glyma01g00860	Glyma01g00860	Gm01:518296-520313	14-7-0	2014-07-07	OK	7.35075	11.996	0.706589	-0.986695	0.323792	0.714403	no
Glyma01g00870	Glyma01g00870	Glyma01g00870	Gm01:523808-529106	14-7-0	2014-07-07	OK	24.6608	39.6908	0.686587	-0.962034	0.336032	0.725203	no
Glyma01g00880	Glyma01g00880	Glyma01g00880	Gm01:544620-550750	14-7-0	2014-07-07	OK	0.0992012	0.633404	2.6747	-2.04173	0.0411788	0.246341	no
Glyma01g00890	Glyma01g00890	Glyma01g00890	Gm01:559624-561661	14-7-0	2014-07-07	NOTEST	0	0.523273	1.79769e+308	1.79769e+308	0.0187408	1	no
Glyma01g00900	Glyma01g00900	Glyma01g00900	Gm01:562674-567038	14-7-0	2014-07-07	NOTEST	0	0.109867	1.79769e+308	1.79769e+308	0.180329	1	no
Glyma01g00910	Glyma01g00910	Glyma01g00910	Gm01:567202-572032	14-7-0	2014-07-07	NOTEST	0.0822644	0.100162	0.283996	-0.216137	0.828881	1	no
Glyma01g00920	Glyma01g00920	Glyma01g00920	Gm01:576437-580149	14-7-0	2014-07-07	NOTEST	0	0	0	0	1	1	no
Glyma01g00930	Glyma01g00930	Glyma01g00930	Gm01:585699-587056	14-7-0	2014-07-07	OK	0.352166	12.3034	5.12666	-5.38754	7.14274e-08	1.37729e-05	yes
Glyma01g00940	Glyma01g00940	Glyma01g00940	Gm01:588160-598604	14-7-0	2014-07-07	OK	23.9838	19.5288	-0.296456	0.483544	0.62871	0.900673	no
Glyma01g00950	Glyma01g00950	Glyma01g00950	Gm01:598924-599925	14-7-0	2014-07-07	OK	0.418785	4.73428	3.49886	-3.65714	0.000255048	0.00845354	yes
Glyma01g00960	Glyma01g00960	Glyma01g00960	Gm01:604191-612760	14-7-0	2014-07-07	OK	5.70556	7.92478	0.474003	-0.731317	0.464586	0.815465	no
Glyma01g00975	Glyma01g00975	Glyma01g00975	Gm01:613982-641941	14-7-0	2014-07-07	OK	0.934563	1.22011	0.384646	-0.530303	0.595902	0.887312	no
Glyma01g00990	Glyma01g00990	Glyma01g00990	Gm01:643213-651111	14-7-0	2014-07-07	OK	1.43285	1.54988	0.11327	-0.172195	0.863284	0.968509	no
Glyma01g01000	Glyma01g01000	Glyma01g01000	Gm01:652294-658333	14-7-0	2014-07-07	OK	21.8269	7.96459	-1.45444	2.17057	0.0299634	0.206206	no
Glyma01g01010	Glyma01g01010	Glyma01g01010	Gm01:663901-668594	14-7-0	2014-07-07	NOTEST	0.397156	0.394102	-0.0111379	0.0100942	0.991946	1	no
Glyma01g01020	Glyma01g01020	Glyma01g01020	Gm01:670826-674335	14-7-0	2014-07-07	OK	33.8243	24.3321	-0.475201	0.797455	0.425187	0.791679	no
Glyma01g01030	Glyma01g01030	Glyma01g01030	Gm01:681416-683646	14-7-0	2014-07-07	NOTEST	0.08329	0.123237	0.565225	-0.430168	0.667073	1	no
Glyma01g01050	Glyma01g01050	Glyma01g01050	Gm01:706987-708399	14-7-0	2014-07-07	NOTEST	0	0.182687	1.79769e+308	1.79769e+308	0.0469445	1	no
Glyma01g01060	Glyma01g01060	Glyma01g01060	Gm01:729658-735082	14-7-0	2014-07-07	OK	8.82359	12.658	0.520615	-0.822443	0.410825	0.781723	no
Glyma01g01070	Glyma01g01070	Glyma01g01070	Gm01:735854-740661	14-7-0	2014-07-07	NOTEST	0.0929103	0.100898	0.11899	-0.0941632	0.92498	1	no
Glyma01g01080	Glyma01g01080	Glyma01g01080	Gm01:741674-745361	14-7-0	2014-07-07	OK	0.341983	0.809006	1.24223	-1.41644	0.156646	0.51445	no
Glyma01g01090	Glyma01g01090	Glyma01g01090	Gm01:746504-750472	14-7-0	2014-07-07	NOTEST	0	0.0168644	1.79769e+308	1.79769e+308	0.180329	1	no
Glyma01g01101	Glyma01g01101	Glyma01g01101	Gm01:752181-756473	14-7-0	2014-07-07	NOTEST	0	0	0	0	1	1	no
Glyma01g01110	Glyma01g01110	Glyma01g01110	Gm01:757751-761280	14-7-0	2014-07-07	OK	5.27204	3.94009	-0.42013	0.69517	0.486949	0.828553	no
Glyma01g01120	Glyma01g01120	Glyma01g01120	Gm01:762982-771636	14-7-0	2014-07-07	NOTEST	0.269225	0.41735	0.632443	-0.655682	0.512029	1	no
Glyma01g01130	Glyma01g01130	Glyma01g01130	Gm01:773986-783534	14-7-0	2014-07-07	NOTEST	0	0	0	0	1	1	no
Glyma01g01140	Glyma01g01140	Glyma01g01140	Gm01:773986-783534	14-7-0	2014-07-07	OK	2.84775	4.6419	0.704889	-0.947323	0.343474	0.731546	no
Glyma01g01150	Glyma01g01150	Glyma01g01150	Gm01:786786-790850	14-7-0	2014-07-07	NOTEST	0.0791925	0.543842	2.77975	-2.13044	0.0331356	1	no
Glyma01g01160	Glyma01g01160	Glyma01g01160	Gm01:801794-812173	14-7-0	2014-07-07	NOTEST	0	0	0	0	1	1	no
Glyma01g01165	Glyma01g01165	Glyma01g01165	Gm01:813195-815449	14-7-0	2014-07-07	NOTEST	0	0	0	0	1	1	no
Glyma01g01170	Glyma01g01170	Glyma01g01170	Gm01:817680-822876	14-7-0	2014-07-07	OK	3.10403	0.944811	-1.71605	2.09763	0.0359379	0.22779	no
Glyma01g01180	Glyma01g01180	Glyma01g01180	Gm01:826828-831862	14-7-0	2014-07-07	OK	19.3269	45.934	1.24895	-1.8509	0.0641837	0.318313	no
Glyma01g01190	Glyma01g01190	Glyma01g01190	Gm01:837437-839839	14-7-0	2014-07-07	OK	8.25727	10.7695	0.383212	-0.645801	0.518408	0.846947	no
Glyma01g01210	Glyma01g01210	Glyma01g01210	Gm01:841603-854009	14-7-0	2014-07-07	NOTEST	0.0481328	0.167168	1.79621	-1.45644	0.145271	1	no
Glyma01g01220	Glyma01g01220	Glyma01g01220	Gm01:861697-864316	14-7-0	2014-07-07	OK	9.57946	13.5411	0.499326	-0.771412	0.440463	0.800619	no
Glyma01g01230	Glyma01g01230	Glyma01g01230	Gm01:864945-873519	14-7-0	2014-07-07	OK	1.68604	1.27887	-0.398769	0.569311	0.569145	0.874691	no
Glyma01g01240	Glyma01g01240	Glyma01g01240	Gm01:882373-883583	14-7-0	2014-07-07	NOTEST	0.330809	0.442704	0.420342	-0.366995	0.713622	1	no
Glyma01g01251	Glyma01g01251	Glyma01g01251	Gm01:897328-899783	14-7-0	2014-07-07	NOTEST	0.0223441	0.0126769	-0.817696	0.266394	0.789936	1	no
Glyma01g01260	Glyma01g01260	Glyma01g01260	Gm01:901470-902792	14-7-0	2014-07-07	OK	18.6385	33.5811	0.849368	-1.43219	0.15209	0.507778	no
Glyma01g01270	Glyma01g01270	Glyma01g01270	Gm01:908126-916913	14-7-0	2014-07-07	OK	7.7319	9.84572	0.348674	-0.589211	0.55572	0.866888	no
Glyma01g01280	Glyma01g01280	Glyma01g01280	Gm01:919766-925870	14-7-0	2014-07-07	OK	0.764275	1.76001	1.20342	-1.66771	0.0953728	0.398044	no
Glyma01g01291	Glyma01g01291	Glyma01g01291	Gm01:934414-936646	14-7-0	2014-07-07	NOTEST	0.222361	0.460195	1.04934	-0.881521	0.378036	1	no
Glyma01g01300	Glyma01g01300	Glyma01g01300	Gm01:937313-940538	14-7-0	2014-07-07	OK	0.19355	0.844663	2.12567	-1.96823	0.0490411	0.272087	no
Glyma01g01310	Glyma01g01310	Glyma01g01310	Gm01:952468-956652	14-7-0	2014-07-07	OK	0.139707	1.33849	3.26013	-3.24233	0.00118555	0.025234	yes
Glyma01g01330	Glyma01g01330	Glyma01g01330	Gm01:959531-963281	14-7-0	2014-07-07	OK	17.1171	11.7642	-0.541038	0.879141	0.379325	0.759495	no
Glyma01g01340	Glyma01g01340	Glyma01g01340	Gm01:966937-971332	14-7-0	2014-07-07	OK	22.3363	8.3711	-1.4159	2.35121	0.0187127	0.156337	no
Glyma01g01350	Glyma01g01350	Glyma01g01350	Gm01:972898-978372	14-7-0	2014-07-07	OK	1.57008	1.33357	-0.235546	0.264548	0.791358	0.950268	no
Glyma01g01360	Glyma01g01360	Glyma01g01360	Gm01:980271-987366	14-7-0	2014-07-07	OK	1.51419	4.67089	1.62516	-2.40903	0.0159951	0.143074	no
Glyma01g01365	Glyma01g01365	Glyma01g01365	Gm01:991596-992349	14-7-0	2014-07-07	NOTEST	0	0	0	0	1	1	no
Glyma01g01370	Glyma01g01370	Glyma01g01370	Gm01:992662-997177	14-7-0	2014-07-07	OK	602.555	969.119	0.68558	-0.690242	0.490042	0.830296	no
Glyma01g01380	Glyma01g01380	Glyma01g01380	Gm01:1000826-1006591	14-7-0	2014-07-07	OK	10.242	12.6026	0.299219	-0.479265	0.63175	0.901878	no
Glyma01g01390	Glyma01g01390	Glyma01g01390	Gm01:1008758-1013501	14-7-0	2014-07-07	OK	26.0727	19.6274	-0.409669	0.668783	0.503634	0.838542	no
Glyma01g01400	Glyma01g01400	Glyma01g01400	Gm01:1018233-1021659	14-7-0	2014-07-07	OK	7.73303	1.11404	-2.79523	4.17517	2.97767e-05	0.00167366	yes
Glyma01g01410	Glyma01g01410	Glyma01g01410	Gm01:1023044-1025742	14-7-0	2014-07-07	OK	64.1694	65.9263	0.0389694	-0.0641222	0.948873	0.989981	no
Glyma01g01420	Glyma01g01420	Glyma01g01420	Gm01:1028982-1033386	14-7-0	2014-07-07	NOTEST	0	0	0	0	1	1	no
Glyma01g01431	Glyma01g01431	Glyma01g01431	Gm01:1035987-1043507	14-7-0	2014-07-07	OK	2.65199	1.18122	-1.1668	1.59444	0.110837	0.429909	no
Glyma01g01440	Glyma01g01440	Glyma01g01440	Gm01:1047147-1051040	14-7-0	2014-07-07	OK	13.8199	9.55306	-0.532716	0.710042	0.477678	0.822903	no
Glyma01g01450	Glyma01g01450	Glyma01g01450	Gm01:1052601-1053493	14-7-0	2014-07-07	OK	0.550989	2.63774	2.25921	-2.13983	0.0323687	0.215972	no
Glyma01g01460	Glyma01g01460	Glyma01g01460	Gm01:1056819-1061665	14-7-0	2014-07-07	OK	10.1931	9.24007	-0.141612	0.237536	0.812241	0.955818	no
Glyma01g01470	Glyma01g01470	Glyma01g01470	Gm01:1066130-1073350	14-7-0	2014-07-07	OK	3.86828	3.71519	-0.0582548	0.0965818	0.923059	0.983023	no
Glyma01g01480	Glyma01g01480	Glyma01g01480	Gm01:1088031-1090516	14-7-0	2014-07-07	OK	14.3572	13.8829	-0.0484665	0.0811875	0.935293	0.986537	no
Glyma01g01491	Glyma01g01491	Glyma01g01491	Gm01:1091316-1094909	14-7-0	2014-07-07	OK	0.911491	0.191934	-2.24762	2.02048	0.0433336	0.253762	no
Glyma01g01500	Glyma01g01500	Glyma01g01500	Gm01:1095456-1099007	14-7-0	2014-07-07	NOTEST	0	0.320067	1.79769e+308	1.79769e+308	0.0325984	1	no
Glyma01g01510	Glyma01g01510	Glyma01g01510	Gm01:1125596-1130365	14-7-0	2014-07-07	NOTEST	0	0	0	0	1	1	no
Glyma01g01521	Glyma01g01521	Glyma01g01521	Gm01:1133845-1137317	14-7-0	2014-07-07	OK	0.523488	0.658672	0.331404	-0.356383	0.721553	0.930476	no
Glyma01g01530	Glyma01g01530	Glyma01g01530	Gm01:1138207-1139962	14-7-0	2014-07-07	NOTEST	0	0.401399	1.79769e+308	1.79769e+308	0.0374605	1	no
Glyma01g01550	Glyma01g01550	Glyma01g01550	Gm01:1143928-1150404	14-7-0	2014-07-07	NOTEST	0	0.406504	1.79769e+308	1.79769e+308	0.0178114	1	no
Glyma01g01560	Glyma01g01560	Glyma01g01560	Gm01:1160591-1165098	14-7-0	2014-07-07	NOTEST	0.0373998	0.324261	3.11605	-2.68157	0.00732767	1	no
Glyma01g01570	Glyma01g01570	Glyma01g01570	Gm01:1165649-1171110	14-7-0	2014-07-07	OK	0.0710644	2.29798	5.0151	-4.63879	3.50451e-06	0.000311434	yes
Glyma01g01580	Glyma01g01580	Glyma01g01580	Gm01:1185427-1188776	14-7-0	2014-07-07	NOTEST	0.0440636	0	-1.79769e+308	-1.79769e+308	0.139932	1	no
Glyma01g01590	Glyma01g01590	Glyma01g01590	Gm01:1196921-1198375	14-7-0	2014-07-07	OK	5.56599	2.52614	-1.1397	1.14624	0.251696	0.639959	no
Glyma01g01601	Glyma01g01601	Glyma01g01601	Gm01:1201663-1205929	14-7-0	2014-07-07	OK	7.41265	13.3862	0.852683	-1.4212	0.155259	0.512331	no
Glyma01g01610	Glyma01g01610	Glyma01g01610	Gm01:1207927-1212597	14-7-0	2014-07-07	OK	7.49721	5.46674	-0.455671	0.764679	0.444463	0.802898	no
Glyma01g01620	Glyma01g01620	Glyma01g01620	Gm01:1215172-1220713	14-7-0	2014-07-07	OK	0.656764	0.265839	-1.30482	1.17181	0.241274	0.626617	no
Glyma01g01630	Glyma01g01630	Glyma01g01630	Gm01:1224165-1228877	14-7-0	2014-07-07	NOTEST	0	0	0	0	1	1	no
Glyma01g01641	Glyma01g01641	Glyma01g01641	Gm01:1231917-1233070	14-7-0	2014-07-07	NOTEST	0	0	0	0	1	1	no
Glyma01g01651	Glyma01g01651	Glyma01g01651	Gm01:1235950-1236741	14-7-0	2014-07-07	NOTEST	0	0.429096	1.79769e+308	1.79769e+308	0.0539625	1	no
Glyma01g01661	Glyma01g01661	Glyma01g01661	Gm01:1237990-1239189	14-7-0	2014-07-07	OK	11.543	14.1454	0.293309	-0.239196	0.810954	0.955368	no
Glyma01g01671	Glyma01g01671	Glyma01g01671	Gm01:1237990-1239189	14-7-0	2014-07-07	OK	6.27039	1.74099	-1.84865	0.854913	0.392599	0.769142	no
Glyma01g01680	Glyma01g01680	Glyma01g01680	Gm01:1241352-1245024	14-7-0	2014-07-07	NOTEST	0	0.00712441	1.79769e+308	1.79769e+308	0.259019	1	no
Glyma01g01690	Glyma01g01690	Glyma01g01690	Gm01:1252980-1257657	14-7-0	2014-07-07	NOTEST	0	0	0	0	1	1	no
Glyma01g01700	Glyma01g01700	Glyma01g01700	Gm01:1273194-1280313	14-7-0	2014-07-07	NOTEST	0	0	0	0	1	1	no
Glyma01g01715	Glyma01g01715	Glyma01g01715	Gm01:1283531-1285362	14-7-0	2014-07-07	NOTEST	0	0	0	0	1	1	no
Glyma01g01730	Glyma01g01730	Glyma01g01730	Gm01:1289360-1298217	14-7-0	2014-07-07	OK	1.15036	1.76815	0.620157	-0.825176	0.409272	0.780612	no
Glyma01g01740	Glyma01g01740	Glyma01g01740	Gm01:1307387-1317730	14-7-0	2014-07-07	OK	2.1503	2.84299	0.402871	-0.513968	0.607274	0.892269	no
Glyma01g01750	Glyma01g01750	Glyma01g01750	Gm01:1319394-1322259	14-7-0	2014-07-07	OK	3.07643	1.86802	-0.719747	1.10747	0.268092	0.658397	no
Glyma01g01770	Glyma01g01770	Glyma01g01770	Gm01:1332992-1336611	14-7-0	2014-07-07	OK	18.8504	2.88802	-2.70644	3.29223	0.000993952	0.0224897	yes
Glyma01g01780	Glyma01g01780	Glyma01g01780	Gm01:1342969-1347966	14-7-0	2014-07-07	NOTEST	0.0200779	0.152329	2.92351	-1.3032	0.192507	1	no
Glyma01g01790	Glyma01g01790	Glyma01g01790	Gm01:1357260-1362758	14-7-0	2014-07-07	NOTEST	0.290525	0.396943	0.450271	-0.367623	0.713154	1	no
Glyma01g01805	Glyma01g01805	Glyma01g01805	Gm01:1377132-1387290	14-7-0	2014-07-07	OK	1.67403	3.76866	1.17073	-1.44942	0.147221	0.499133	no
Glyma01g01820	Glyma01g01820	Glyma01g01820	Gm01:1391664-1392341	14-7-0	2014-07-07	NOTEST	0	0	0	0	1	1	no
Glyma01g01830	Glyma01g01830	Glyma01g01830	Gm01:1394336-1398687	14-7-0	2014-07-07	OK	18.4465	17.5627	-0.0708295	0.113644	0.90952	0.979981	no
Glyma01g01840	Glyma01g01840	Glyma01g01840	Gm01:1399714-1403226	14-7-0	2014-07-07	OK	2.66728	2.54294	-0.0688692	0.078783	0.937205	0.986906	no
Glyma01g01850	Glyma01g01850	Glyma01g01850	Gm01:1409321-1416077	14-7-0	2014-07-07	OK	0.45532	1.0125	1.15297	-1.37827	0.168121	0.532565	no
Glyma01g01860	Glyma01g01860	Glyma01g01860	Gm01:1432595-1439227	14-7-0	2014-07-07	OK	3.50912	3.34169	-0.07053	0.106313	0.915334	0.98122	no
Glyma01g01875	Glyma01g01875	Glyma01g01875	Gm01:1464340-1468599	14-7-0	2014-07-07	OK	3.0314	6.75374	1.1557	-1.54595	0.122116	0.453869	no
Glyma01g01890	Glyma01g01890	Glyma01g01890	Gm01:1483775-1488285	14-7-0	2014-07-07	OK	14.1582	18.8443	0.412489	-0.695706	0.486613	0.82854	no
Glyma01g01900	Glyma01g01900	Glyma01g01900	Gm01:1489317-1495820	14-7-0	2014-07-07	OK	11.2094	15.0664	0.426631	-0.605379	0.544927	0.861269	no
Glyma01g01910	Glyma01g01910	Glyma01g01910	Gm01:1500824-1504087	14-7-0	2014-07-07	OK	116.371	110.131	-0.0795101	0.100365	0.920054	0.981828	no
Glyma01g01920	Glyma01g01920	Glyma01g01920	Gm01:1504880-1510358	14-7-0	2014-07-07	NOTEST	0.101762	0.130918	0.363464	-0.319173	0.749595	1	no
Glyma01g01930	Glyma01g01930	Glyma01g01930	Gm01:1511111-1512857	14-7-0	2014-07-07	OK	2.05228	2.60463	0.343849	-0.324176	0.745805	0.937648	no
Glyma01g01940	Glyma01g01940	Glyma01g01940	Gm01:1514417-1515781	14-7-0	2014-07-07	OK	17.1718	28.9983	0.755927	-1.27132	0.203616	0.581185	no
Glyma01g01950	Glyma01g01950	Glyma01g01950	Gm01:1520439-1523995	14-7-0	2014-07-07	OK	9.1024	11.5204	0.339869	-0.563988	0.572763	0.876828	no
Glyma01g01960	Glyma01g01960	Glyma01g01960	Gm01:1526003-1531395	14-7-0	2014-07-07	OK	1.44165	1.30571	-0.142892	0.169382	0.865496	0.969277	no
Glyma01g01970	Glyma01g01970	Glyma01g01970	Gm01:1532782-1536385	14-7-0	2014-07-07	OK	2.15668	1.36641	-0.658417	0.619062	0.535875	0.856441	no
Glyma01g01980	Glyma01g01980	Glyma01g01980	Gm01:1537139-1538153	14-7-0	2014-07-07	NOTEST	0	0	0	0	1	1	no
Glyma01g01990	Glyma01g01990	Glyma01g01990	Gm01:1540562-1544363	14-7-0	2014-07-07	OK	5.93064	4.57793	-0.373491	0.616777	0.537382	0.857434	no
Glyma01g02020	Glyma01g02020	Glyma01g02020	Gm01:1547972-1555699	14-7-0	2014-07-07	LOWDATA	0	0	-1.79769e+308	0	1	1	no
Glyma01g02031	Glyma01g02031	Glyma01g02031	Gm01:1547972-1555699	14-7-0	2014-07-07	NOTEST	0.166038	0.264632	0.672477	-0.689496	0.490511	1	no
Glyma01g02040	Glyma01g02040	Glyma01g02040	Gm01:1558849-1560186	14-7-0	2014-07-07	OK	4.12157	1.91736	-1.10407	1.22718	0.219755	0.602475	no
Glyma01g02050	Glyma01g02050	Glyma01g02050	Gm01:1564664-1568931	14-7-0	2014-07-07	OK	2.34982	1.36923	-0.779185	0.896087	0.370206	0.752179	no
Glyma01g02060	Glyma01g02060	Glyma01g02060	Gm01:1577696-1587475	14-7-0	2014-07-07	OK	5.99483	9.43031	0.653587	-1.09177	0.274935	0.666342	no
Glyma01g02070	Glyma01g02070	Glyma01g02070	Gm01:1596899-1599449	14-7-0	2014-07-07	NOTEST	0.136894	0.192224	0.489733	-0.372715	0.709361	1	no
Glyma01g02080	Glyma01g02080	Glyma01g02080	Gm01:1603349-1604459	14-7-0	2014-07-07	NOTEST	0	0	0	0	1	1	no
Glyma01g02090	Glyma01g02090	Glyma01g02090	Gm01:1613117-1616592	14-7-0	2014-07-07	OK	27.1827	18.6097	-0.546633	0.916319	0.359499	0.745253	no
Glyma01g02100	Glyma01g02100	Glyma01g02100	Gm01:1618639-1623534	14-7-0	2014-07-07	OK	4.22388	4.99968	0.243269	-0.396166	0.691983	0.92106	no
Glyma01g02110	Glyma01g02110	Glyma01g02110	Gm01:1626846-1628287	14-7-0	2014-07-07	OK	5.01291	5.62278	0.165635	-0.214272	0.830335	0.959923	no
Glyma01g02120	Glyma01g02120	Glyma01g02120	Gm01:1633690-1637207	14-7-0	2014-07-07	OK	12.8569	10.9419	-0.232682	0.388976	0.697294	0.922832	no
Glyma01g02130	Glyma01g02130	Glyma01g02130	Gm01:1642576-1643443	14-7-0	2014-07-07	NOTEST	0	0	0	0	1	1	no
Glyma01g02140	Glyma01g02140	Glyma01g02140	Gm01:1648084-1649989	14-7-0	2014-07-07	OK	0	0.715528	1.79769e+308	1.79769e+308	0.0184993	0.155134	no
Glyma01g02150	Glyma01g02150	Glyma01g02150	Gm01:1653306-1656923	14-7-0	2014-07-07	OK	25.4493	49.8007	0.968544	-1.58601	0.112736	0.434181	no
Glyma01g02160	Glyma01g02160	Glyma01g02160	Gm01:1662473-1663732	14-7-0	2014-07-07	NOTEST	0	0	0	0	1	1	no
Glyma01g02171	Glyma01g02171	Glyma01g02171	Gm01:1673102-1673545	14-7-0	2014-07-07	NOTEST	0.277047	0	-1.79769e+308	-1.79769e+308	0.139932	1	no
Glyma01g02180	Glyma01g02180	Glyma01g02180	Gm01:1688059-1691046	14-7-0	2014-07-07	OK	26.8496	9.08882	-1.56273	2.59161	0.0095528	0.103126	no
Glyma01g02190	Glyma01g02190	Glyma01g02190	Gm01:1721264-1722533	14-7-0	2014-07-07	OK	7.83885	5.44921	-0.524595	0.692973	0.488326	0.829478	no
Glyma01g02200	Glyma01g02200	Glyma01g02200	Gm01:1733389-1734562	14-7-0	2014-07-07	OK	3.35611	5.54453	0.724273	-1.04354	0.296698	0.690646	no
Glyma01g02215	Glyma01g02215	Glyma01g02215	Gm01:1735229-1736763	14-7-0	2014-07-07	OK	11.3815	42.6732	1.90664	-2.99792	0.0027183	0.0443064	yes
Glyma01g02230	Glyma01g02230	Glyma01g02230	Gm01:1744296-1745378	14-7-0	2014-07-07	OK	3.26529	15.5047	2.24742	-2.60436	0.00920471	0.100537	no
Glyma01g02235	Glyma01g02235	Glyma01g02235	Gm01:1747643-1748703	14-7-0	2014-07-07	NOTEST	0	0	0	0	1	1	no
Glyma01g02240	Glyma01g02240	Glyma01g02240	Gm01:1748705-1753242	14-7-0	2014-07-07	OK	1.66291	1.62594	-0.0324405	0.0459375	0.96336	0.993129	no
Glyma01g02251	Glyma01g02251	Glyma01g02251	Gm01:1771935-1773875	14-7-0	2014-07-07	OK	14.8777	18.0383	0.277913	-0.462281	0.64388	0.906493	no
Glyma01g02260	Glyma01g02260	Glyma01g02260	Gm01:1781864-1782671	14-7-0	2014-07-07	NOTEST	0	0	0	0	1	1	no
Glyma01g02270	Glyma01g02270	Glyma01g02270	Gm01:1782704-1786280	14-7-0	2014-07-07	OK	2.02565	2.50243	0.304943	-0.332695	0.739365	0.935392	no
Glyma01g02280	Glyma01g02280	Glyma01g02280	Gm01:1788990-1791158	14-7-0	2014-07-07	OK	2.69899	4.94315	0.873009	-1.30669	0.191318	0.564031	no
Glyma01g02290	Glyma01g02290	Glyma01g02290	Gm01:1803011-1804370	14-7-0	2014-07-07	OK	16.6257	6.82907	-1.28365	2.09541	0.0361349	0.228519	no
Glyma01g02295	Glyma01g02295	Glyma01g02295	Gm01:1813531-1816390	14-7-0	2014-07-07	NOTEST	0	0	0	0	1	1	no
Glyma01g02300	Glyma01g02300	Glyma01g02300	Gm01:1817115-1820935	14-7-0	2014-07-07	NOTEST	0.226183	0.244121	0.110101	-0.0960915	0.923448	1	no
Glyma01g02310	Glyma01g02310	Glyma01g02310	Gm01:1822915-1823629	14-7-0	2014-07-07	NOTEST	0	0	0	0	1	1	no
Glyma01g02321	Glyma01g02321	Glyma01g02321	Gm01:1825753-1835393	14-7-0	2014-07-07	OK	10.078	10.8588	0.107651	-0.167603	0.866896	0.969277	no
Glyma01g02330	Glyma01g02330	Glyma01g02330	Gm01:1838125-1845872	14-7-0	2014-07-07	OK	0.579298	1.27865	1.14224	-1.37973	0.167671	0.531749	no
Glyma01g02340	Glyma01g02340	Glyma01g02340	Gm01:1865275-1868142	14-7-0	2014-07-07	OK	2.279	3.09888	0.443347	-0.681282	0.495693	0.834001	no
Glyma01g02350	Glyma01g02350	Glyma01g02350	Gm01:1886187-1890464	14-7-0	2014-07-07	OK	3.12666	6.87861	1.13749	-1.61968	0.105301	0.417863	no
Glyma01g02360	Glyma01g02360	Glyma01g02360	Gm01:1905414-1906471	14-7-0	2014-07-07	OK	11.9084	1.32539	-3.16749	3.84523	0.000120439	0.00485222	yes
Glyma01g02380	Glyma01g02380	Glyma01g02380	Gm01:1929549-1932204	14-7-0	2014-07-07	OK	1.15189	0.706611	-0.705013	0.827164	0.408144	0.779596	no
Glyma01g02390	Glyma01g02390	Glyma01g02390	Gm01:1940680-1942652	14-7-0	2014-07-07	OK	0.258454	1.95787	2.92131	-3.02399	0.00249468	0.041919	yes
Glyma01g02400	Glyma01g02400	Glyma01g02400	Gm01:1969464-1975586	14-7-0	2014-07-07	OK	67.0897	48.4214	-0.470446	0.630595	0.528305	0.852831	no
Glyma01g02420	Glyma01g02420	Glyma01g02420	Gm01:1977639-1982632	14-7-0	2014-07-07	OK	5.04115	5.78479	0.198511	-0.318925	0.749783	0.938368	no
Glyma01g02435	Glyma01g02435	Glyma01g02435	Gm01:1989327-1993130	14-7-0	2014-07-07	NOTEST	0	0	0	0	1	1	no
Glyma01g02451	Glyma01g02451	Glyma01g02451	Gm01:1998300-2009388	14-7-0	2014-07-07	NOTEST	0.0999701	0.0157323	-2.66777	0.550413	0.582036	1	no
Glyma01g02465	Glyma01g02465	Glyma01g02465	Gm01:1998300-2009388	14-7-0	2014-07-07	OK	5.42275	7.91609	0.545764	-0.612133	0.54045	0.859151	no
Glyma01g02480	Glyma01g02480	Glyma01g02480	Gm01:2010099-2018636	14-7-0	2014-07-07	OK	15.8354	29.4878	0.896968	-1.44394	0.148755	0.502603	no
Glyma01g02510	Glyma01g02510	Glyma01g02510	Gm01:2033797-2034792	14-7-0	2014-07-07	NOTEST	0	0	0	0	1	1	no
Glyma01g02525	Glyma01g02525	Glyma01g02525	Gm01:2038298-2054214	14-7-0	2014-07-07	NOTEST	0	0	0	0	1	1	no
Glyma01g02540	Glyma01g02540	Glyma01g02540	Gm01:2065426-2066242	14-7-0	2014-07-07	NOTEST	0	0	0	0	1	1	no
Glyma01g02550	Glyma01g02550	Glyma01g02550	Gm01:2067340-2068207	14-7-0	2014-07-07	NOTEST	0	0	0	0	1	1	no
Glyma01g02560	Glyma01g02560	Glyma01g02560	Gm01:2089449-2097520	14-7-0	2014-07-07	NOTEST	0.0291537	0.115335	1.98408	-1.24886	0.211717	1	no
Glyma01g02570	Glyma01g02570	Glyma01g02570	Gm01:2102150-2107115	14-7-0	2014-07-07	OK	3.21109	7.24863	1.17465	-1.79556	0.0725647	0.340483	no
Glyma01g02580	Glyma01g02580	Glyma01g02580	Gm01:2119856-2122838	14-7-0	2014-07-07	OK	0.245602	2.79073	3.50625	-3.65203	0.000260172	0.008577	yes
Glyma01g02610	Glyma01g02610	Glyma01g02610	Gm01:2137616-2139436	14-7-0	2014-07-07	OK	0	1.37702	1.79769e+308	1.79769e+308	0.00571921	0.0731151	no
Glyma01g02620	Glyma01g02620	Glyma01g02620	Gm01:2146050-2152449	14-7-0	2014-07-07	NOTEST	0	0.0699176	1.79769e+308	1.79769e+308	0.0469445	1	no
Glyma01g02630	Glyma01g02630	Glyma01g02630	Gm01:2156930-2161301	14-7-0	2014-07-07	OK	3.25122	4.15122	0.352553	-0.513245	0.60778	0.892269	no
Glyma01g02640	Glyma01g02640	Glyma01g02640	Gm01:2168404-2173706	14-7-0	2014-07-07	OK	2.28838	6.09036	1.4122	-2.08637	0.0369453	0.231615	no
Glyma01g02660	Glyma01g02660	Glyma01g02660	Gm01:2184322-2188837	14-7-0	2014-07-07	OK	6.66353	5.77631	-0.206136	0.302176	0.762518	0.942169	no
Glyma01g02670	Glyma01g02670	Glyma01g02670	Gm01:2192165-2194689	14-7-0	2014-07-07	OK	17.3149	6.70411	-1.3689	2.28456	0.0223386	0.172905	no
Glyma01g02691	Glyma01g02691	Glyma01g02691	Gm01:2199760-2201127	14-7-0	2014-07-07	OK	1.67241	0.197295	-3.08351	2.69664	0.00700431	0.083656	no
Glyma01g02710	Glyma01g02710	Glyma01g02710	Gm01:2204078-2206129	14-7-0	2014-07-07	NOTEST	0	0	0	0	1	1	no
Glyma01g02720	Glyma01g02720	Glyma01g02720	Gm01:2204078-2206129	14-7-0	2014-07-07	OK	26.8102	35.3028	0.397002	-0.670432	0.502582	0.837785	no
Glyma01g02740	Glyma01g02740	Glyma01g02740	Gm01:2209772-2211864	14-7-0	2014-07-07	NOTEST	0.408471	0.257025	-0.668323	0.633093	0.526673	1	no
Glyma01g02750	Glyma01g02750	Glyma01g02750	Gm01:2228817-2234268	14-7-0	2014-07-07	NOTEST	0.245723	0.354327	0.528051	-0.501207	0.616226	1	no
Glyma01g02760	Glyma01g02760	Glyma01g02760	Gm01:2239126-2244480	14-7-0	2014-07-07	NOTEST	0	0.182158	1.79769e+308	1.79769e+308	0.0340686	1	no
Glyma01g02780	Glyma01g02780	Glyma01g02780	Gm01:2274285-2279870	14-7-0	2014-07-07	OK	6.48758	9.80623	0.596018	-1.00514	0.314828	0.706783	no
Glyma01g02790	Glyma01g02790	Glyma01g02790	Gm01:2280412-2286189	14-7-0	2014-07-07	NOTEST	0.0730232	0.534638	2.87214	-2.28025	0.022593	1	no
Glyma01g02800	Glyma01g02800	Glyma01g02800	Gm01:2289835-2296934	14-7-0	2014-07-07	OK	2.27937	1.55449	-0.552188	0.720841	0.471007	0.819085	no
Glyma01g02810	Glyma01g02810	Glyma01g02810	Gm01:2296971-2301386	14-7-0	2014-07-07	NOTEST	0.0188457	0.247989	3.71797	-2.47655	0.0132658	1	no
Glyma01g02820	Glyma01g02820	Glyma01g02820	Gm01:2307249-2310533	14-7-0	2014-07-07	OK	9.58985	8.90283	-0.107244	0.176563	0.859852	0.967641	no
Glyma01g02830	Glyma01g02830	Glyma01g02830	Gm01:2320650-2323809	14-7-0	2014-07-07	NOTEST	0	0	0	0	1	1	no
Glyma01g02840	Glyma01g02840	Glyma01g02840	Gm01:2324547-2332128	14-7-0	2014-07-07	OK	15.9155	4.71901	-1.75388	2.80787	0.00498699	0.0668252	no
Glyma01g02850	Glyma01g02850	Glyma01g02850	Gm01:2336135-2340956	14-7-0	2014-07-07	OK	29.0089	19.3121	-0.586994	0.923676	0.355655	0.742614	no
Glyma01g02880	Glyma01g02880	Glyma01g02880	Gm01:2360197-2366406	14-7-0	2014-07-07	OK	14.9491	6.7971	-1.13707	1.48531	0.137462	0.48392	no
Glyma01g02890	Glyma01g02890	Glyma01g02890	Gm01:2373884-2395585	14-7-0	2014-07-07	OK	2.15421	1.09127	-0.981153	1.49334	0.135349	0.47984	no
Glyma01g02900	Glyma01g02900	Glyma01g02900	Gm01:2398001-2407368	14-7-0	2014-07-07	OK	1.72727	0.722804	-1.25682	1.45268	0.146312	0.497737	no
Glyma01g02920	Glyma01g02920	Glyma01g02920	Gm01:2419558-2420449	14-7-0	2014-07-07	OK	1.65086	1.73725	0.0735859	-0.0800761	0.936177	0.986569	no
Glyma01g02930	Glyma01g02930	Glyma01g02930	Gm01:2424756-2426304	14-7-0	2014-07-07	NOTEST	0.146703	0.123222	-0.251639	0.170959	0.864256	1	no
Glyma01g02941	Glyma01g02941	Glyma01g02941	Gm01:2426753-2435682	14-7-0	2014-07-07	OK	1.90293	1.38502	-0.458319	0.676858	0.498496	0.835569	no
Glyma01g02950	Glyma01g02950	Glyma01g02950	Gm01:2448362-2450139	14-7-0	2014-07-07	OK	28.2272	43.6222	0.627973	-1.0094	0.312784	0.704907	no
Glyma01g02963	Glyma01g02963	Glyma01g02963	Gm01:2455817-2458234	14-7-0	2014-07-07	NOTEST	0.0376267	0.0130735	-1.52511	0.531506	0.595068	1	no
Glyma01g02976	Glyma01g02976	Glyma01g02976	Gm01:2465269-2466518	14-7-0	2014-07-07	NOTEST	0	0	0	0	1	1	no
Glyma01g02990	Glyma01g02990	Glyma01g02990	Gm01:2477179-2479230	14-7-0	2014-07-07	OK	0.279575	2.84945	3.34937	-3.31778	0.000907362	0.0210519	yes
Glyma01g03005	Glyma01g03005	Glyma01g03005	Gm01:2495435-2497366	14-7-0	2014-07-07	NOTEST	0.179235	0.142147	-0.334476	0.271533	0.785981	1	no
Glyma01g03020	Glyma01g03020	Glyma01g03020	Gm01:2497579-2500150	14-7-0	2014-07-07	OK	10.5386	11.3655	0.108985	-0.178388	0.858418	0.967609	no
Glyma01g03030	Glyma01g03030	Glyma01g03030	Gm01:2522226-2524933	14-7-0	2014-07-07	OK	1.88619	1.7278	-0.126539	0.162288	0.871079	0.970617	no
Glyma01g03040	Glyma01g03040	Glyma01g03040	Gm01:2530562-2537849	14-7-0	2014-07-07	NOTEST	0	0.305009	1.79769e+308	1.79769e+308	0.031252	1	no
Glyma01g03050	Glyma01g03050	Glyma01g03050	Gm01:2543533-2544636	14-7-0	2014-07-07	NOTEST	0	0	0	0	1	1	no
Glyma01g03060	Glyma01g03060	Glyma01g03060	Gm01:2551019-2553294	14-7-0	2014-07-07	NOTEST	0.0376571	0.193686	2.36273	-1.51302	0.130275	1	no
Glyma01g03070	Glyma01g03070	Glyma01g03070	Gm01:2585415-2586673	14-7-0	2014-07-07	OK	232.404	427.567	0.879519	-1.19567	0.231826	0.61602	no
Glyma01g03090	Glyma01g03090	Glyma01g03090	Gm01:2600263-2605224	14-7-0	2014-07-07	OK	3.8924	2.11935	-0.877038	1.26123	0.207227	0.585594	no
Glyma01g03100	Glyma01g03100	Glyma01g03100	Gm01:2633476-2636259	14-7-0	2014-07-07	OK	1.42089	7.08931	2.31885	-3.23837	0.00120213	0.0254531	yes
Glyma01g03110	Glyma01g03110	Glyma01g03110	Gm01:2667742-2669323	14-7-0	2014-07-07	NOTEST	0	0	0	0	1	1	no
Glyma01g03120	Glyma01g03120	Glyma01g03120	Gm01:2683531-2686001	14-7-0	2014-07-07	OK	1.68214	5.18825	1.62495	-2.07941	0.0375793	0.232428	no
Glyma01g03130	Glyma01g03130	Glyma01g03130	Gm01:2686762-2690092	14-7-0	2014-07-07	OK	2.76305	3.74333	0.438062	-0.655162	0.512363	0.843548	no
Glyma01g03140	Glyma01g03140	Glyma01g03140	Gm01:2696508-2700015	14-7-0	2014-07-07	LOWDATA	0	0	-1.29251	0	1	1	no
Glyma01g03150	Glyma01g03150	Glyma01g03150	Gm01:2696508-2700015	14-7-0	2014-07-07	OK	48.4098	19.7628	-1.29251	1.73307	0.0830828	0.36831	no
Glyma01g03160	Glyma01g03160	Glyma01g03160	Gm01:2716401-2724818	14-7-0	2014-07-07	OK	22.551	11.7419	-0.941526	1.41545	0.156938	0.514605	no
Glyma01g03180	Glyma01g03180	Glyma01g03180	Gm01:2725857-2728953	14-7-0	2014-07-07	OK	60.3341	33.9601	-0.829135	1.31248	0.189357	0.561015	no
Glyma01g03190	Glyma01g03190	Glyma01g03190	Gm01:2731349-2739464	14-7-0	2014-07-07	OK	0.486099	3.16471	2.70275	-3.25794	0.00112223	0.02435	yes
Glyma01g03200	Glyma01g03200	Glyma01g03200	Gm01:2741979-2744444	14-7-0	2014-07-07	NOTEST	0	0	0	0	1	1	no
Glyma01g03210	Glyma01g03210	Glyma01g03210	Gm01:2749285-2751625	14-7-0	2014-07-07	NOTEST	0.324836	0.341861	0.0736965	-0.0730913	0.941733	1	no
Glyma01g03220	Glyma01g03220	Glyma01g03220	Gm01:2752604-2755538	14-7-0	2014-07-07	OK	6.55343	4.99005	-0.393195	0.628979	0.529363	0.853332	no
Glyma01g03240	Glyma01g03240	Glyma01g03240	Gm01:2765558-2766634	14-7-0	2014-07-07	NOTEST	0	0.0659743	1.79769e+308	1.79769e+308	0.180329	1	no
Glyma01g03260	Glyma01g03260	Glyma01g03260	Gm01:2784884-2792465	14-7-0	2014-07-07	OK	501.011	490.525	-0.0305165	0.0281249	0.977563	0.99538	no
Glyma01g03270	Glyma01g03270	Glyma01g03270	Gm01:2803081-2807357	14-7-0	2014-07-07	OK	3.40652	7.57001	1.152	-1.78098	0.0749162	0.346277	no
Glyma01g03281	Glyma01g03281	Glyma01g03281	Gm01:2811064-2811250	14-7-0	2014-07-07	NOTEST	0	0	0	0	1	1	no
Glyma01g03290	Glyma01g03290	Glyma01g03290	Gm01:2814292-2814876	14-7-0	2014-07-07	NOTEST	0	0	0	0	1	1	no
Glyma01g03301	Glyma01g03301	Glyma01g03301	Gm01:2815679-2817384	14-7-0	2014-07-07	NOTEST	0	0	0	0	1	1	no
Glyma01g03310	Glyma01g03310	Glyma01g03310	Gm01:2820282-2822588	14-7-0	2014-07-07	NOTEST	0	0	0	0	1	1	no
Glyma01g03321	Glyma01g03321	Glyma01g03321	Gm01:2825602-2830330	14-7-0	2014-07-07	NOTEST	0	0	0	0	1	1	no
Glyma01g03330	Glyma01g03330	Glyma01g03330	Gm01:2836050-2840937	14-7-0	2014-07-07	OK	2.62782	5.3547	1.02694	-1.54917	0.121342	0.453022	no
Glyma01g03340	Glyma01g03340	Glyma01g03340	Gm01:2843206-2846996	14-7-0	2014-07-07	NOTEST	0	0	0	0	1	1	no
Glyma01g03360	Glyma01g03360	Glyma01g03360	Gm01:2857640-2860816	14-7-0	2014-07-07	OK	14.3322	4.15666	-1.78577	2.50224	0.0123409	0.121934	no
Glyma01g03371	Glyma01g03371	Glyma01g03371	Gm01:2868081-2871591	14-7-0	2014-07-07	NOTEST	0.221494	0.094986	-1.22148	0.866638	0.38614	1	no
Glyma01g03380	Glyma01g03380	Glyma01g03380	Gm01:2872827-2875983	14-7-0	2014-07-07	OK	5.15557	7.92129	0.619602	-0.935823	0.349364	0.737375	no
Glyma01g03390	Glyma01g03390	Glyma01g03390	Gm01:2879282-2884236	14-7-0	2014-07-07	OK	0.781267	0.781017	-0.000463155	0.000522269	0.999583	0.999955	no
Glyma01g03400	Glyma01g03400	Glyma01g03400	Gm01:2895941-2899203	14-7-0	2014-07-07	NOTEST	0	0	0	0	1	1	no
Glyma01g03410	Glyma01g03410	Glyma01g03410	Gm01:2907608-2911173	14-7-0	2014-07-07	NOTEST	0	0	0	0	1	1	no
Glyma01g03420	Glyma01g03420	Glyma01g03420	Gm01:2912689-2918182	14-7-0	2014-07-07	OK	1.32716	1.63823	0.303793	-0.402734	0.687144	0.919941	no
Glyma01g03430	Glyma01g03430	Glyma01g03430	Gm01:2918596-2922169	14-7-0	2014-07-07	OK	6.24131	6.97193	0.159709	-0.237471	0.812292	0.955818	no
Glyma01g03450	Glyma01g03450	Glyma01g03450	Gm01:2932298-2941083	14-7-0	2014-07-07	NOTEST	0	0	0	0	1	1	no
Glyma01g03470	Glyma01g03470	Glyma01g03470	Gm01:2983533-2985063	14-7-0	2014-07-07	OK	2.99052	5.43144	0.860939	-1.0638	0.28742	0.681043	no
Glyma01g03480	Glyma01g03480	Glyma01g03480	Gm01:2985878-2990726	14-7-0	2014-07-07	OK	0.898687	3.35101	1.8987	-2.46594	0.0136655	0.130358	no
Glyma01g03490	Glyma01g03490	Glyma01g03490	Gm01:2997710-3004125	14-7-0	2014-07-07	OK	5.1795	6.20906	0.261563	-0.439978	0.659953	0.911647	no
Glyma01g03500	Glyma01g03500	Glyma01g03500	Gm01:3020777-3022182	14-7-0	2014-07-07	OK	2.90422	9.14096	1.65419	-2.48631	0.0129074	0.125788	no
Glyma01g03530	Glyma01g03530	Glyma01g03530	Gm01:3043747-3048064	14-7-0	2014-07-07	OK	8.86668	13.4195	0.597869	-1.00922	0.31287	0.704907	no
Glyma01g03540	Glyma01g03540	Glyma01g03540	Gm01:3063216-3065991	14-7-0	2014-07-07	OK	6.59929	10.3668	0.651592	-1.04801	0.294635	0.68843	no
Glyma01g03550	Glyma01g03550	Glyma01g03550	Gm01:3067764-3073752	14-7-0	2014-07-07	OK	22.2996	13.247	-0.751346	1.26172	0.20705	0.585594	no
Glyma01g03570	Glyma01g03570	Glyma01g03570	Gm01:3082363-3083185	14-7-0	2014-07-07	OK	241.294	198.639	-0.280643	0.408104	0.683198	0.919161	no
Glyma01g03580	Glyma01g03580	Glyma01g03580	Gm01:3090805-3093412	14-7-0	2014-07-07	NOTEST	0.0684611	0.159659	1.22164	-0.537017	0.591256	1	no
Glyma01g03590	Glyma01g03590	Glyma01g03590	Gm01:3106546-3108525	14-7-0	2014-07-07	OK	17.11	20.5995	0.267767	-0.432959	0.665044	0.913513	no
Glyma01g03600	Glyma01g03600	Glyma01g03600	Gm01:3114320-3119083	14-7-0	2014-07-07	OK	14.9192	4.45995	-1.74207	2.34793	0.0188781	0.157107	no
Glyma01g03610	Glyma01g03610	Glyma01g03610	Gm01:3120584-3124029	14-7-0	2014-07-07	OK	14.0629	15.554	0.145388	-0.245578	0.806009	0.953704	no
Glyma01g03621	Glyma01g03621	Glyma01g03621	Gm01:3124253-3126137	14-7-0	2014-07-07	OK	0.642322	0.307437	-1.06301	0.93322	0.350707	0.73828	no
Glyma01g03630	Glyma01g03630	Glyma01g03630	Gm01:3127061-3127831	14-7-0	2014-07-07	NOTEST	0	0	0	0	1	1	no
Glyma01g03650	Glyma01g03650	Glyma01g03650	Gm01:3132200-3135385	14-7-0	2014-07-07	OK	45.0752	33.5011	-0.428126	0.633743	0.526249	0.851502	no
Glyma01g03661	Glyma01g03661	Glyma01g03661	Gm01:3135687-3141621	14-7-0	2014-07-07	NOTEST	0	0.0280932	1.79769e+308	1.79769e+308	0.374208	1	no
Glyma01g03670	Glyma01g03670	Glyma01g03670	Gm01:3144701-3145778	14-7-0	2014-07-07	OK	0.0948105	2.38711	4.65407	-3.18115	0.00146694	0.0293155	yes
Glyma01g03690	Glyma01g03690	Glyma01g03690	Gm01:3152038-3157769	14-7-0	2014-07-07	NOTEST	0	0	0	0	1	1	no
Glyma01g03700	Glyma01g03700	Glyma01g03700	Gm01:3162858-3164334	14-7-0	2014-07-07	OK	2.34035	1.36591	-0.776862	0.949077	0.342581	0.730887	no
Glyma01g03710	Glyma01g03710	Glyma01g03710	Gm01:3167711-3172458	14-7-0	2014-07-07	OK	5.48936	2.08465	-1.39684	1.83397	0.0666581	0.323827	no
Glyma01g03720	Glyma01g03720	Glyma01g03720	Gm01:3174000-3185126	14-7-0	2014-07-07	OK	77.925	50.6134	-0.622566	0.875132	0.381502	0.761548	no
Glyma01g03730	Glyma01g03730	Glyma01g03730	Gm01:3187344-3190927	14-7-0	2014-07-07	OK	15.6331	12.2814	-0.348135	0.573742	0.566142	0.872755	no
Glyma01g03750	Glyma01g03750	Glyma01g03750	Gm01:3193903-3200492	14-7-0	2014-07-07	OK	22.6349	17.0798	-0.406259	0.68483	0.493451	0.832254	no
Glyma01g03760	Glyma01g03760	Glyma01g03760	Gm01:3219159-3222449	14-7-0	2014-07-07	OK	2.2312	18.0075	3.01271	-4.64916	3.33293e-06	0.00029966	yes
Glyma01g03780	Glyma01g03780	Glyma01g03780	Gm01:3233213-3235819	14-7-0	2014-07-07	OK	1.93899	1.96664	0.0204269	-0.0151498	0.987913	0.997191	no
Glyma01g03790	Glyma01g03790	Glyma01g03790	Gm01:3242605-3245458	14-7-0	2014-07-07	NOTEST	0.0310997	0.0631164	1.02112	-0.623834	0.532737	1	no
Glyma01g03810	Glyma01g03810	Glyma01g03810	Gm01:3249405-3255967	14-7-0	2014-07-07	OK	33.2014	15.9715	-1.05574	1.44875	0.147407	0.499485	no
Glyma01g03820	Glyma01g03820	Glyma01g03820	Gm01:3263267-3267637	14-7-0	2014-07-07	OK	1.71183	2.53656	0.567335	-0.786329	0.431675	0.796209	no
Glyma01g03830	Glyma01g03830	Glyma01g03830	Gm01:3283632-3286899	14-7-0	2014-07-07	OK	6.02023	13.0629	1.11758	-1.80952	0.0703707	0.334651	no
Glyma01g03850	Glyma01g03850	Glyma01g03850	Gm01:3312867-3318968	14-7-0	2014-07-07	OK	3.41714	1.9006	-0.846338	1.20989	0.226322	0.609608	no
Glyma01g03870	Glyma01g03870	Glyma01g03870	Gm01:3327064-3332585	14-7-0	2014-07-07	OK	2.5687	3.92213	0.6106	-0.977966	0.328091	0.718188	no
Glyma01g03880	Glyma01g03880	Glyma01g03880	Gm01:3348917-3352335	14-7-0	2014-07-07	OK	0.530798	3.85379	2.86004	-3.57526	0.000349877	0.0106735	yes
Glyma01g03890	Glyma01g03890	Glyma01g03890	Gm01:3359534-3372620	14-7-0	2014-07-07	OK	3.34541	4.07789	0.28564	-0.469469	0.638734	0.904985	no
Glyma01g03900	Glyma01g03900	Glyma01g03900	Gm01:3378305-3380122	14-7-0	2014-07-07	NOTEST	0.0488842	0.409266	3.0656	-2.00346	0.0451284	1	no
Glyma01g03910	Glyma01g03910	Glyma01g03910	Gm01:3381988-3384388	14-7-0	2014-07-07	NOTEST	0.176665	0.218082	0.303854	-0.245403	0.806145	1	no
Glyma01g03921	Glyma01g03921	Glyma01g03921	Gm01:3390102-3396781	14-7-0	2014-07-07	NOTEST	0	0.0620497	1.79769e+308	1.79769e+308	0.108531	1	no
Glyma01g03930	Glyma01g03930	Glyma01g03930	Gm01:3400476-3411080	14-7-0	2014-07-07	OK	14.6157	20.0035	0.452734	-0.741724	0.458254	0.810843	no
Glyma01g03940	Glyma01g03940	Glyma01g03940	Gm01:3413504-3415979	14-7-0	2014-07-07	NOTEST	0.250822	0.422715	0.753018	-0.687705	0.491638	1	no
Glyma01g03948	Glyma01g03948	Glyma01g03948	Gm01:3423773-3425166	14-7-0	2014-07-07	NOTEST	0.199557	0.587779	1.55847	-1.136	0.255958	1	no
Glyma01g03956	Glyma01g03956	Glyma01g03956	Gm01:3431068-3433014	14-7-0	2014-07-07	OK	5.67854	6.42787	0.178819	-0.259674	0.795115	0.951368	no
Glyma01g03964	Glyma01g03964	Glyma01g03964	Gm01:3433091-3436594	14-7-0	2014-07-07	OK	0.344373	0.674298	0.969415	-1.04145	0.297666	0.691259	no
Glyma01g03972	Glyma01g03972	Glyma01g03972	Gm01:3439667-3441084	14-7-0	2014-07-07	NOTEST	0	0	0	0	1	1	no
Glyma01g03980	Glyma01g03980	Glyma01g03980	Gm01:3455191-3461955	14-7-0	2014-07-07	OK	0.615398	0.711057	0.208446	-0.272013	0.785612	0.949015	no
Glyma01g04000	Glyma01g04000	Glyma01g04000	Gm01:3487914-3494204	14-7-0	2014-07-07	NOTEST	0.215648	0.284509	0.399795	-0.418436	0.675628	1	no
Glyma01g04015	Glyma01g04015	Glyma01g04015	Gm01:3502393-3507947	14-7-0	2014-07-07	NOTEST	0.0615936	0.15288	1.31154	-0.801266	0.422978	1	no
Glyma01g04030	Glyma01g04030	Glyma01g04030	Gm01:3513144-3513438	14-7-0	2014-07-07	NOTEST	0	0	0	0	1	1	no
Glyma01g04040	Glyma01g04040	Glyma01g04040	Gm01:3514698-3521382	14-7-0	2014-07-07	OK	1.08991	2.42746	1.15524	-1.29383	0.195723	0.569918	no
Glyma01g04050	Glyma01g04050	Glyma01g04050	Gm01:3524004-3527778	14-7-0	2014-07-07	OK	56.9484	36.4568	-0.643466	0.991729	0.32133	0.71205	no
Glyma01g04060	Glyma01g04060	Glyma01g04060	Gm01:3533389-3537718	14-7-0	2014-07-07	OK	6.2261	6.94832	0.158336	-0.251391	0.801511	0.952539	no
Glyma01g04070	Glyma01g04070	Glyma01g04070	Gm01:3541049-3543307	14-7-0	2014-07-07	OK	1.76738	56.5049	4.99869	-6.49567	8.26654e-11	5.50965e-08	yes
Glyma01g04080	Glyma01g04080	Glyma01g04080	Gm01:3552334-3560811	14-7-0	2014-07-07	OK	0.457458	0.978279	1.09661	-0.602679	0.546722	0.862304	no
Glyma01g04090	Glyma01g04090	Glyma01g04090	Gm01:3552334-3560811	14-7-0	2014-07-07	OK	1.6112	8.8432	2.45643	-2.59018	0.00959257	0.103447	no
Glyma01g04100	Glyma01g04100	Glyma01g04100	Gm01:3565109-3567816	14-7-0	2014-07-07	OK	1.44589	3.25519	1.17078	-1.62412	0.104351	0.416043	no
Glyma01g04107	Glyma01g04107	Glyma01g04107	Gm01:3570498-3572031	14-7-0	2014-07-07	OK	1.34636	1.01005	-0.414639	0.432631	0.665283	0.913513	no
Glyma01g04114	Glyma01g04114	Glyma01g04114	Gm01:3573892-3576381	14-7-0	2014-07-07	NOTEST	0	0	0	0	1	1	no
Glyma01g04122	Glyma01g04122	Glyma01g04122	Gm01:3576871-3579242	14-7-0	2014-07-07	NOTEST	0.0479068	0.146166	1.60931	-1.00041	0.317113	1	no
Glyma01g04130	Glyma01g04130	Glyma01g04130	Gm01:3588235-3590927	14-7-0	2014-07-07	OK	23.9456	20.5936	-0.217559	0.360177	0.718715	0.929593	no
Glyma01g04140	Glyma01g04140	Glyma01g04140	Gm01:3593852-3595627	14-7-0	2014-07-07	OK	5.90144	4.5182	-0.385319	0.561534	0.574434	0.877552	no
Glyma01g04151	Glyma01g04151	Glyma01g04151	Gm01:3601850-3604249	14-7-0	2014-07-07	OK	1.20621	5.30606	2.13716	-2.8363	0.00456397	0.0629733	no
Glyma01g04160	Glyma01g04160	Glyma01g04160	Gm01:3614505-3619208	14-7-0	2014-07-07	NOTEST	0	0.0631017	1.79769e+308	1.79769e+308	0.15945	1	no
Glyma01g04170	Glyma01g04170	Glyma01g04170	Gm01:3622380-3627999	14-7-0	2014-07-07	OK	19.4323	12.1059	-0.682744	0.971918	0.331091	0.720278	no
Glyma01g04190	Glyma01g04190	Glyma01g04190	Gm01:3657972-3659933	14-7-0	2014-07-07	OK	1.50624	5.49222	1.86644	-2.40036	0.0163792	0.144926	no
Glyma01g04200	Glyma01g04200	Glyma01g04200	Gm01:3671722-3676091	14-7-0	2014-07-07	NOTEST	0.0823724	0.119338	0.534826	-0.457235	0.647502	1	no
Glyma01g04210	Glyma01g04210	Glyma01g04210	Gm01:3695969-3699966	14-7-0	2014-07-07	LOWDATA	0	0	-1.79769e+308	0	1	1	no
Glyma01g04220	Glyma01g04220	Glyma01g04220	Gm01:3695969-3699966	14-7-0	2014-07-07	OK	0.107746	0.658057	2.61057	-2.28627	0.0222382	0.172346	no
Glyma01g04230	Glyma01g04230	Glyma01g04230	Gm01:3717479-3721262	14-7-0	2014-07-07	OK	8.21372	12.4308	0.597814	-1.00534	0.314732	0.706783	no
Glyma01g04241	Glyma01g04241	Glyma01g04241	Gm01:3734519-3735893	14-7-0	2014-07-07	OK	0.443822	0.611678	0.462792	-0.444632	0.656586	0.91097	no
Glyma01g04250	Glyma01g04250	Glyma01g04250	Gm01:3750043-3752379	14-7-0	2014-07-07	OK	0.729996	1.55394	1.08997	-1.28172	0.199942	0.575807	no
Glyma01g04261	Glyma01g04261	Glyma01g04261	Gm01:3767622-3769840	14-7-0	2014-07-07	NOTEST	0	0	0	0	1	1	no
Glyma01g04270	Glyma01g04270	Glyma01g04270	Gm01:3770398-3790851	14-7-0	2014-07-07	OK	5.85111	6.75902	0.208105	-0.318718	0.74994	0.938368	no
Glyma01g04285	Glyma01g04285	Glyma01g04285	Gm01:3792928-3793735	14-7-0	2014-07-07	OK	1.85556	0	-1.79769e+308	-1.79769e+308	0.0176634	0.150889	no
Glyma01g04300	Glyma01g04300	Glyma01g04300	Gm01:3800482-3805133	14-7-0	2014-07-07	OK	2.6012	4.38818	0.754445	-0.990156	0.322098	0.71287	no
Glyma01g04310	Glyma01g04310	Glyma01g04310	Gm01:3839061-3840278	14-7-0	2014-07-07	NOTEST	0	0	0	0	1	1	no
Glyma01g04320	Glyma01g04320	Glyma01g04320	Gm01:3843990-3851452	14-7-0	2014-07-07	OK	10.6599	8.30445	-0.360241	0.563486	0.573104	0.876918	no
Glyma01g04330	Glyma01g04330	Glyma01g04330	Gm01:3875178-3876239	14-7-0	2014-07-07	OK	0.4169	0.990469	1.24841	-1.00384	0.315455	0.707376	no
Glyma01g04335	Glyma01g04335	Glyma01g04335	Gm01:3875178-3876239	14-7-0	2014-07-07	OK	0	2.41102	1.79769e+308	1.79769e+308	0.277308	0.668974	no
Glyma01g04340	Glyma01g04340	Glyma01g04340	Gm01:3894968-3896837	14-7-0	2014-07-07	OK	0.423907	0.654377	0.626373	-0.620666	0.534819	0.855967	no
Glyma01g04350	Glyma01g04350	Glyma01g04350	Gm01:3901049-3902869	14-7-0	2014-07-07	OK	26.3017	6.83437	-1.94427	3.19288	0.0014086	0.028356	yes
Glyma01g04361	Glyma01g04361	Glyma01g04361	Gm01:3905975-3906745	14-7-0	2014-07-07	NOTEST	0	0	0	0	1	1	no
Glyma01g04370	Glyma01g04370	Glyma01g04370	Gm01:3910797-3912019	14-7-0	2014-07-07	OK	2.72934	0	-1.79769e+308	-1.79769e+308	0.00507788	0.0677766	no
Glyma01g04380	Glyma01g04380	Glyma01g04380	Gm01:3925166-3926952	14-7-0	2014-07-07	OK	1.17151	0.708175	-0.726197	0.790782	0.429071	0.794308	no
Glyma01g04400	Glyma01g04400	Glyma01g04400	Gm01:3936729-3941417	14-7-0	2014-07-07	OK	11.0975	12.7484	0.200089	-0.338327	0.735117	0.934004	no
Glyma01g04410	Glyma01g04410	Glyma01g04410	Gm01:3950636-3955032	14-7-0	2014-07-07	OK	3.40789	1.25021	-1.44671	1.80552	0.0709931	0.336142	no
Glyma01g04421	Glyma01g04421	Glyma01g04421	Gm01:3965515-3967099	14-7-0	2014-07-07	OK	0.164549	0.818187	2.31392	-1.9314	0.0534332	0.28585	no
Glyma01g04430	Glyma01g04430	Glyma01g04430	Gm01:3981173-3984324	14-7-0	2014-07-07	NOTEST	0.0262345	0.0918732	1.80818	-1.13813	0.255064	1	no
Glyma01g04440	Glyma01g04440	Glyma01g04440	Gm01:3984541-3989981	14-7-0	2014-07-07	OK	3.78632	6.31194	0.737287	-1.0944	0.273781	0.664439	no
Glyma01g04450	Glyma01g04450	Glyma01g04450	Gm01:3990476-3991986	14-7-0	2014-07-07	OK	0.200911	1.71585	3.0943	-2.86588	0.00415848	0.059057	no
Glyma01g04460	Glyma01g04460	Glyma01g04460	Gm01:3993484-3995564	14-7-0	2014-07-07	OK	11.2308	8.2383	-0.447046	0.754076	0.450804	0.80616	no
Glyma01g04468	Glyma01g04468	Glyma01g04468	Gm01:4005281-4011408	14-7-0	2014-07-07	OK	1.86514	0.420163	-2.15026	2.1219	0.0338464	0.220646	no
Glyma01g04476	Glyma01g04476	Glyma01g04476	Gm01:4012612-4020206	14-7-0	2014-07-07	OK	4.47793	6.58889	0.557205	-0.94096	0.346725	0.734844	no
Glyma01g04484	Glyma01g04484	Glyma01g04484	Gm01:4023641-4024312	14-7-0	2014-07-07	OK	10.016	3.60925	-1.47253	1.64849	0.0992525	0.405298	no
Glyma01g04492	Glyma01g04492	Glyma01g04492	Gm01:4024327-4035566	14-7-0	2014-07-07	OK	3.52612	4.0475	0.198949	-0.334436	0.738051	0.934915	no
Glyma01g04500	Glyma01g04500	Glyma01g04500	Gm01:4070066-4074636	14-7-0	2014-07-07	OK	0.487495	0.694528	0.510646	-0.573231	0.566488	0.87296	no
Glyma01g04515	Glyma01g04515	Glyma01g04515	Gm01:4094045-4096371	14-7-0	2014-07-07	OK	2.58597	1.78003	-0.538801	0.779127	0.435905	0.798817	no
Glyma01g04530	Glyma01g04530	Glyma01g04530	Gm01:4108620-4111438	14-7-0	2014-07-07	OK	76.4984	19.9299	-1.9405	3.0396	0.00236894	0.0406535	yes
Glyma01g04545	Glyma01g04545	Glyma01g04545	Gm01:4119639-4119995	14-7-0	2014-07-07	NOTEST	0	0	0	0	1	1	no
Glyma01g04560	Glyma01g04560	Glyma01g04560	Gm01:4134768-4138744	14-7-0	2014-07-07	OK	3.13007	3.06862	-0.0286049	0.0361908	0.97113	0.994395	no
Glyma01g04570	Glyma01g04570	Glyma01g04570	Gm01:4140494-4144862	14-7-0	2014-07-07	OK	8.1823	8.04636	-0.0241699	0.0376749	0.969947	0.994366	no
Glyma01g04580	Glyma01g04580	Glyma01g04580	Gm01:4160568-4163236	14-7-0	2014-07-07	OK	0.253028	2.02694	3.00194	-3.03423	0.00241147	0.0410775	yes
Glyma01g04590	Glyma01g04590	Glyma01g04590	Gm01:4190455-4199176	14-7-0	2014-07-07	OK	0.850485	1.39423	0.713113	-1.03626	0.300082	0.69378	no
Glyma01g04600	Glyma01g04600	Glyma01g04600	Gm01:4213202-4215294	14-7-0	2014-07-07	OK	6.95837	7.242	0.0576402	-0.0847682	0.932446	0.98555	no
Glyma01g04610	Glyma01g04610	Glyma01g04610	Gm01:4217440-4221353	14-7-0	2014-07-07	OK	1.59103	2.09923	0.399899	-0.494669	0.620834	0.897904	no
Glyma01g04616	Glyma01g04616	Glyma01g04616	Gm01:4234777-4236309	14-7-0	2014-07-07	NOTEST	0	0	0	0	1	1	no
Glyma01g04623	Glyma01g04623	Glyma01g04623	Gm01:4248628-4253094	14-7-0	2014-07-07	NOTEST	0	0	0	0	1	1	no
Glyma01g04630	Glyma01g04630	Glyma01g04630	Gm01:4267486-4273671	14-7-0	2014-07-07	OK	0.660778	0.53448	-0.306031	0.344285	0.730632	0.933167	no
Glyma01g04640	Glyma01g04640	Glyma01g04640	Gm01:4278592-4280521	14-7-0	2014-07-07	NOTEST	0.0453104	0.383564	3.08155	-2.02109	0.0432703	1	no
Glyma01g04650	Glyma01g04650	Glyma01g04650	Gm01:4282743-4288290	14-7-0	2014-07-07	NOTEST	0	0	0	0	1	1	no
Glyma01g04660	Glyma01g04660	Glyma01g04660	Gm01:4294494-4299400	14-7-0	2014-07-07	OK	0.501042	1.0407	1.05455	-1.14774	0.251077	0.639402	no
Glyma01g04670	Glyma01g04670	Glyma01g04670	Gm01:4302121-4303918	14-7-0	2014-07-07	OK	0.139561	1.57746	3.49863	-3.06355	0.00218728	0.0385622	yes
Glyma01g04690	Glyma01g04690	Glyma01g04690	Gm01:4314360-4316230	14-7-0	2014-07-07	OK	3.09674	7.82009	1.33643	-1.92407	0.0543458	0.288753	no
Glyma01g04700	Glyma01g04700	Glyma01g04700	Gm01:4319542-4321677	14-7-0	2014-07-07	NOTEST	0	0	0	0	1	1	no
Glyma01g04710	Glyma01g04710	Glyma01g04710	Gm01:4323773-4325439	14-7-0	2014-07-07	OK	153.322	122.609	-0.322498	0.486902	0.626328	0.899668	no
Glyma01g04720	Glyma01g04720	Glyma01g04720	Gm01:4331150-4337114	14-7-0	2014-07-07	OK	2.42048	4.10482	0.762027	-1.14076	0.253971	0.642269	no
Glyma01g04730	Glyma01g04730	Glyma01g04730	Gm01:4347876-4356892	14-7-0	2014-07-07	OK	1.26107	2.075	0.718463	-0.97847	0.327842	0.717848	no
Glyma01g04740	Glyma01g04740	Glyma01g04740	Gm01:4358996-4361499	14-7-0	2014-07-07	OK	1.31875	3.28245	1.31561	-1.67172	0.0945803	0.396039	no
Glyma01g04750	Glyma01g04750	Glyma01g04750	Gm01:4367348-4370072	14-7-0	2014-07-07	OK	0.155599	0.873808	2.48948	-2.23731	0.0252658	0.185711	no
Glyma01g04760	Glyma01g04760	Glyma01g04760	Gm01:4370091-4371490	14-7-0	2014-07-07	OK	17.3111	33.0833	0.934407	-1.56015	0.118725	0.447559	no
Glyma01g04770	Glyma01g04770	Glyma01g04770	Gm01:4372756-4380517	14-7-0	2014-07-07	NOTEST	0	0	0	0	1	1	no
Glyma01g04780	Glyma01g04780	Glyma01g04780	Gm01:4372756-4380517	14-7-0	2014-07-07	NOTEST	0	0	0	0	1	1	no
Glyma01g04791	Glyma01g04791	Glyma01g04791	Gm01:4372756-4380517	14-7-0	2014-07-07	NOTEST	0.593232	0.0751182	-2.98136	2.80441	0.00504083	1	no
Glyma01g04800	Glyma01g04800	Glyma01g04800	Gm01:4381634-4382677	14-7-0	2014-07-07	NOTEST	0	0	0	0	1	1	no
Glyma01g04810	Glyma01g04810	Glyma01g04810	Gm01:4398540-4400009	14-7-0	2014-07-07	NOTEST	0	0	0	0	1	1	no
Glyma01g04820	Glyma01g04820	Glyma01g04820	Gm01:4406613-4412858	14-7-0	2014-07-07	OK	8.23678	8.45919	0.0384403	-0.0649949	0.948178	0.989981	no
Glyma01g04830	Glyma01g04830	Glyma01g04830	Gm01:4435158-4439690	14-7-0	2014-07-07	OK	12.9618	3.18722	-2.02389	3.19433	0.00140158	0.0282858	yes
Glyma01g04860	Glyma01g04860	Glyma01g04860	Gm01:4462980-4471168	14-7-0	2014-07-07	OK	6.25349	3.96966	-0.655648	1.08173	0.279373	0.671842	no
Glyma01g04870	Glyma01g04870	Glyma01g04870	Gm01:4462980-4471168	14-7-0	2014-07-07	NOTEST	0	0	0	0	1	1	no
Glyma01g04880	Glyma01g04880	Glyma01g04880	Gm01:4472509-4474524	14-7-0	2014-07-07	OK	3.82041	7.92303	1.05233	-1.50884	0.131339	0.472286	no
Glyma01g04890	Glyma01g04890	Glyma01g04890	Gm01:4508033-4510800	14-7-0	2014-07-07	OK	6.80191	15.0733	1.14798	-1.68653	0.091694	0.389963	no
Glyma01g04895	Glyma01g04895	Glyma01g04895	Gm01:4537147-4539699	14-7-0	2014-07-07	NOTEST	0	0	0	0	1	1	no
Glyma01g04900	Glyma01g04900	Glyma01g04900	Gm01:4581543-4588129	14-7-0	2014-07-07	OK	4.07661	2.06393	-0.981972	1.1202	0.262627	0.65254	no
Glyma01g04920	Glyma01g04920	Glyma01g04920	Gm01:4591469-4596424	14-7-0	2014-07-07	OK	32.7265	10.408	-1.65276	2.53298	0.0113098	0.115035	no
Glyma01g04930	Glyma01g04930	Glyma01g04930	Gm01:4617117-4621351	14-7-0	2014-07-07	OK	8.63612	6.59331	-0.389379	0.60901	0.542518	0.860079	no
Glyma01g04940	Glyma01g04940	Glyma01g04940	Gm01:4623827-4626604	14-7-0	2014-07-07	NOTEST	0	0	0	0	1	1	no
Glyma01g04950	Glyma01g04950	Glyma01g04950	Gm01:4628266-4630966	14-7-0	2014-07-07	NOTEST	0	0	0	0	1	1	no
Glyma01g04970	Glyma01g04970	Glyma01g04970	Gm01:4642856-4646062	14-7-0	2014-07-07	NOTEST	0	0	0	0	1	1	no
Glyma01g04980	Glyma01g04980	Glyma01g04980	Gm01:4649145-4655506	14-7-0	2014-07-07	OK	12.0368	14.6109	0.279583	-0.454366	0.649565	0.908313	no
Glyma01g04991	Glyma01g04991	Glyma01g04991	Gm01:4658655-4660266	14-7-0	2014-07-07	OK	1.03164	1.18178	0.196022	-0.226496	0.820815	0.958214	no
Glyma01g05000	Glyma01g05000	Glyma01g05000	Gm01:4661267-4665903	14-7-0	2014-07-07	OK	8.42037	6.39768	-0.396335	0.610861	0.541291	0.859334	no
Glyma01g05020	Glyma01g05020	Glyma01g05020	Gm01:4671907-4672948	14-7-0	2014-07-07	NOTEST	0	0	0	0	1	1	no
Glyma01g05035	Glyma01g05035	Glyma01g05035	Gm01:4674370-4675308	14-7-0	2014-07-07	NOTEST	0	0	0	0	1	1	no
Glyma01g05050	Glyma01g05050	Glyma01g05050	Gm01:4685833-4692108	14-7-0	2014-07-07	NOTEST	0	0	0	0	1	1	no
Glyma01g05060	Glyma01g05060	Glyma01g05060	Gm01:4706315-4710196	14-7-0	2014-07-07	NOTEST	0	0	0	0	1	1	no
Glyma01g05070	Glyma01g05070	Glyma01g05070	Gm01:4710246-4716428	14-7-0	2014-07-07	NOTEST	0	0	0	0	1	1	no
Glyma01g05080	Glyma01g05080	Glyma01g05080	Gm01:4729092-4732808	14-7-0	2014-07-07	OK	5.22077	1.43967	-1.85853	2.25629	0.0240523	0.181095	no
Glyma01g05090	Glyma01g05090	Glyma01g05090	Gm01:4733168-4736974	14-7-0	2014-07-07	NOTEST	0.301765	0.122614	-1.2993	1.05559	0.291154	1	no
Glyma01g05100	Glyma01g05100	Glyma01g05100	Gm01:4750064-4755456	14-7-0	2014-07-07	OK	1.00699	2.01274	0.999107	-1.3137	0.188948	0.560371	no
Glyma01g05110	Glyma01g05110	Glyma01g05110	Gm01:4767629-4768506	14-7-0	2014-07-07	NOTEST	0	0	0	0	1	1	no
Glyma01g05120	Glyma01g05120	Glyma01g05120	Gm01:4767629-4768506	14-7-0	2014-07-07	NOTEST	0	0	0	0	1	1	no
Glyma01g05135	Glyma01g05135	Glyma01g05135	Gm01:4772497-4774260	14-7-0	2014-07-07	NOTEST	0	0	0	0	1	1	no
Glyma01g05150	Glyma01g05150	Glyma01g05150	Gm01:4805906-4807682	14-7-0	2014-07-07	OK	133.535	85.4212	-0.644551	0.974691	0.329714	0.719326	no
Glyma01g05160	Glyma01g05160	Glyma01g05160	Gm01:4822853-4826845	14-7-0	2014-07-07	OK	8.77526	6.02149	-0.543323	0.899816	0.368218	0.750499	no
Glyma01g05170	Glyma01g05170	Glyma01g05170	Gm01:4850795-4854700	14-7-0	2014-07-07	OK	1.72789	3.47849	1.00945	-1.31868	0.187277	0.557862	no
Glyma01g05180	Glyma01g05180	Glyma01g05180	Gm01:4855329-4863296	14-7-0	2014-07-07	NOTEST	0.0601513	0.221248	1.879	-0.800087	0.423661	1	no
Glyma01g05190	Glyma01g05190	Glyma01g05190	Gm01:4855329-4863296	14-7-0	2014-07-07	NOTEST	0.100487	0.0964512	-0.0591315	0.0343574	0.972592	1	no
Glyma01g05220	Glyma01g05220	Glyma01g05220	Gm01:4891977-4893336	14-7-0	2014-07-07	OK	61.0405	24.9866	-1.28861	2.12893	0.0332601	0.218279	no
Glyma01g05230	Glyma01g05230	Glyma01g05230	Gm01:4900381-4902743	14-7-0	2014-07-07	OK	1.51777	6.61401	2.12357	-2.92646	0.00342847	0.052088	no
Glyma01g05240	Glyma01g05240	Glyma01g05240	Gm01:4928138-4929616	14-7-0	2014-07-07	NOTEST	0.275851	0.256202	-0.106608	0.0724274	0.942262	1	no
Glyma01g05310	Glyma01g05310	Glyma01g05310	Gm01:4961751-4963489	14-7-0	2014-07-07	NOTEST	0.108934	0	-1.79769e+308	-1.79769e+308	0.139932	1	no
Glyma01g05321	Glyma01g05321	Glyma01g05321	Gm01:5005094-5010084	14-7-0	2014-07-07	OK	1.59625	1.70152	0.092139	-0.0881493	0.929758	0.984847	no
Glyma01g05330	Glyma01g05330	Glyma01g05330	Gm01:5020413-5021405	14-7-0	2014-07-07	NOTEST	0	0	0	0	1	1	no
Glyma01g05340	Glyma01g05340	Glyma01g05340	Gm01:5037886-5042760	14-7-0	2014-07-07	OK	6.41356	3.00792	-1.09236	1.66233	0.0964465	0.400454	no
Glyma01g05350	Glyma01g05350	Glyma01g05350	Gm01:5083980-5085647	14-7-0	2014-07-07	OK	3.61681	7.52568	1.0571	-1.57901	0.114333	0.437785	no
Glyma01g05360	Glyma01g05360	Glyma01g05360	Gm01:5110798-5114049	14-7-0	2014-07-07	OK	1.55296	1.82487	0.232777	-0.253373	0.79998	0.952092	no
Glyma01g05370	Glyma01g05370	Glyma01g05370	Gm01:5118887-5122289	14-7-0	2014-07-07	NOTEST	0.368421	0.581174	0.657615	-0.564307	0.572545	1	no
Glyma01g05390	Glyma01g05390	Glyma01g05390	Gm01:5164083-5165652	14-7-0	2014-07-07	NOTEST	0	0	0	0	1	1	no
Glyma01g05410	Glyma01g05410	Glyma01g05410	Gm01:5213600-5216013	14-7-0	2014-07-07	OK	5.88139	11.5206	0.969981	-1.62603	0.103944	0.415273	no
Glyma01g05430	Glyma01g05430	Glyma01g05430	Gm01:5252557-5258022	14-7-0	2014-07-07	OK	3.23058	3.2902	0.0263835	-0.0373073	0.97024	0.994366	no
Glyma01g05435	Glyma01g05435	Glyma01g05435	Gm01:5252557-5258022	14-7-0	2014-07-07	NOTEST	0	0	0	0	1	1	no
Glyma01g05440	Glyma01g05440	Glyma01g05440	Gm01:5263624-5268235	14-7-0	2014-07-07	OK	0.917921	2.59161	1.49741	-1.90651	0.0565838	0.295465	no
Glyma01g05450	Glyma01g05450	Glyma01g05450	Gm01:5286387-5287671	14-7-0	2014-07-07	OK	0.0847184	0.691057	3.02806	-1.97892	0.0478249	0.26786	no
Glyma01g05470	Glyma01g05470	Glyma01g05470	Gm01:5303846-5307805	14-7-0	2014-07-07	OK	1.09565	1.58451	0.532249	-0.589217	0.555716	0.866888	no
Glyma01g05490	Glyma01g05490	Glyma01g05490	Gm01:5313627-5317389	14-7-0	2014-07-07	OK	8.43339	7.3155	-0.205157	0.319896	0.749048	0.938349	no
Glyma01g05500	Glyma01g05500	Glyma01g05500	Gm01:5324074-5325556	14-7-0	2014-07-07	OK	0.911241	0	-1.79769e+308	-1.79769e+308	0.0128959	0.125716	no
Glyma01g05521	Glyma01g05521	Glyma01g05521	Gm01:5332060-5334718	14-7-0	2014-07-07	NOTEST	0	0	0	0	1	1	no
Glyma01g05540	Glyma01g05540	Glyma01g05540	Gm01:5339676-5347885	14-7-0	2014-07-07	NOTEST	0.188498	0.127318	-0.566108	0.410488	0.681448	1	no
Glyma01g05550	Glyma01g05550	Glyma01g05550	Gm01:5348570-5352305	14-7-0	2014-07-07	OK	6.73755	7.64086	0.181509	-0.295021	0.767978	0.944084	no
Glyma01g05565	Glyma01g05565	Glyma01g05565	Gm01:5365957-5368432	14-7-0	2014-07-07	NOTEST	0.317713	0.316376	-0.00608386	0.00585124	0.995331	1	no
Glyma01g05580	Glyma01g05580	Glyma01g05580	Gm01:5372439-5377697	14-7-0	2014-07-07	OK	1.27219	1.63712	0.363849	-0.485821	0.627094	0.899802	no
Glyma01g05680	Glyma01g05680	Glyma01g05680	Gm01:5434961-5437325	14-7-0	2014-07-07	NOTEST	0	0	0	0	1	1	no
Glyma01g05710	Glyma01g05710	Glyma01g05710	Gm01:5452126-5455897	14-7-0	2014-07-07	OK	2.96453	1.4847	-0.997636	1.46536	0.142823	0.49178	no
Glyma01g05740	Glyma01g05740	Glyma01g05740	Gm01:5471207-5473302	14-7-0	2014-07-07	OK	66.3686	50.3748	-0.397798	0.64803	0.516965	0.846477	no
Glyma01g05750	Glyma01g05750	Glyma01g05750	Gm01:5490127-5498444	14-7-0	2014-07-07	OK	7.48872	4.87421	-0.619551	0.989712	0.322315	0.713276	no
Glyma01g05760	Glyma01g05760	Glyma01g05760	Gm01:5490127-5498444	14-7-0	2014-07-07	OK	4.55733	1.52472	-1.57964	0.711553	0.476742	0.822713	no
Glyma01g05765	Glyma01g05765	Glyma01g05765	Gm01:5500755-5503968	14-7-0	2014-07-07	NOTEST	0	0.281358	1.79769e+308	1.79769e+308	0.0539625	1	no
Glyma01g05770	Glyma01g05770	Glyma01g05770	Gm01:5507145-5510888	14-7-0	2014-07-07	OK	0.879959	0.551221	-0.674806	0.636661	0.524345	0.850334	no
Glyma01g05775	Glyma01g05775	Glyma01g05775	Gm01:5515370-5518889	14-7-0	2014-07-07	NOTEST	0	0	0	0	1	1	no
Glyma01g05780	Glyma01g05780	Glyma01g05780	Gm01:5532190-5532902	14-7-0	2014-07-07	NOTEST	0	0.478091	1.79769e+308	1.79769e+308	0.0638309	1	no
Glyma01g05800	Glyma01g05800	Glyma01g05800	Gm01:5536188-5540803	14-7-0	2014-07-07	OK	12.3549	14.0356	0.184009	-0.309391	0.757024	0.940566	no
Glyma01g05805	Glyma01g05805	Glyma01g05805	Gm01:5546122-5546986	14-7-0	2014-07-07	NOTEST	0	0	0	0	1	1	no
Glyma01g05810	Glyma01g05810	Glyma01g05810	Gm01:5571757-5573352	14-7-0	2014-07-07	OK	7.752	1.3757	-2.4944	3.27729	0.0010481	0.0233022	yes
Glyma01g05820	Glyma01g05820	Glyma01g05820	Gm01:5576197-5588666	14-7-0	2014-07-07	OK	4.21602	2.32242	-0.860255	0.879577	0.379089	0.759292	no
Glyma01g05830	Glyma01g05830	Glyma01g05830	Gm01:5591933-5594156	14-7-0	2014-07-07	OK	0.59668	1.48575	1.31617	-1.54412	0.122559	0.454594	no
Glyma01g05840	Glyma01g05840	Glyma01g05840	Gm01:5603554-5605881	14-7-0	2014-07-07	NOTEST	0	0	0	0	1	1	no
Glyma01g05850	Glyma01g05850	Glyma01g05850	Gm01:5614232-5617834	14-7-0	2014-07-07	NOTEST	0	0.107724	1.79769e+308	1.79769e+308	0.0980491	1	no
Glyma01g05860	Glyma01g05860	Glyma01g05860	Gm01:5646198-5652308	14-7-0	2014-07-07	OK	2.20433	1.60918	-0.454019	0.605542	0.544819	0.861188	no
Glyma01g05871	Glyma01g05871	Glyma01g05871	Gm01:5655285-5657085	14-7-0	2014-07-07	OK	0.544299	0.908914	0.739745	-0.692028	0.48892	0.829907	no
Glyma01g05880	Glyma01g05880	Glyma01g05880	Gm01:5667408-5668624	14-7-0	2014-07-07	OK	2.52405	6.16856	1.28919	-1.78762	0.0738378	0.343745	no
Glyma01g05890	Glyma01g05890	Glyma01g05890	Gm01:5668699-5671152	14-7-0	2014-07-07	NOTEST	0.224111	0.494574	1.14198	-1.09081	0.275355	1	no
Glyma01g05920	Glyma01g05920	Glyma01g05920	Gm01:5704147-5706648	14-7-0	2014-07-07	OK	2.14022	4.46264	1.06014	-1.58046	0.114002	0.436948	no
Glyma01g05933	Glyma01g05933	Glyma01g05933	Gm01:5723315-5724248	14-7-0	2014-07-07	NOTEST	0	0	0	0	1	1	no
Glyma01g05946	Glyma01g05946	Glyma01g05946	Gm01:5726524-5728292	14-7-0	2014-07-07	NOTEST	0	0	0	0	1	1	no
Glyma01g05960	Glyma01g05960	Glyma01g05960	Gm01:5750258-5754433	14-7-0	2014-07-07	OK	1.03372	0.55377	-0.900487	1.00773	0.313585	0.705658	no
Glyma01g05970	Glyma01g05970	Glyma01g05970	Gm01:5789076-5789854	14-7-0	2014-07-07	NOTEST	0	0.110018	1.79769e+308	1.79769e+308	0.180329	1	no
Glyma01g05980	Glyma01g05980	Glyma01g05980	Gm01:5800710-5803197	14-7-0	2014-07-07	NOTEST	0.0415645	0.120745	1.53854	-0.956417	0.338862	1	no
Glyma01g05991	Glyma01g05991	Glyma01g05991	Gm01:5815181-5815856	14-7-0	2014-07-07	OK	1.50685	0.36969	-2.02715	1.71125	0.0870356	0.378339	no
Glyma01g06001	Glyma01g06001	Glyma01g06001	Gm01:5820213-5821125	14-7-0	2014-07-07	NOTEST	0.136653	0	-1.79769e+308	-1.79769e+308	0.139932	1	no
Glyma01g06010	Glyma01g06010	Glyma01g06010	Gm01:5849676-5850474	14-7-0	2014-07-07	OK	2.00598	5.38155	1.42371	-1.67191	0.094543	0.396007	no
Glyma01g06030	Glyma01g06030	Glyma01g06030	Gm01:5873668-5876124	14-7-0	2014-07-07	OK	13.948	327.025	4.55127	-6.04478	1.49618e-09	6.28374e-07	yes
Glyma01g06060	Glyma01g06060	Glyma01g06060	Gm01:5950520-5957354	14-7-0	2014-07-07	OK	2.82031	2.24239	-0.330816	0.457572	0.64726	0.907589	no
Glyma01g06080	Glyma01g06080	Glyma01g06080	Gm01:5980779-5983675	14-7-0	2014-07-07	OK	6.65568	7.5815	0.187898	-0.288488	0.772973	0.945989	no
Glyma01g06091	Glyma01g06091	Glyma01g06091	Gm01:6001894-6002536	14-7-0	2014-07-07	NOTEST	0	0	0	0	1	1	no
Glyma01g06101	Glyma01g06101	Glyma01g06101	Gm01:6012889-6016913	14-7-0	2014-07-07	NOTEST	0	0	0	0	1	1	no
Glyma01g06110	Glyma01g06110	Glyma01g06110	Gm01:6012889-6016913	14-7-0	2014-07-07	OK	97.2745	117.065	0.267181	-0.402062	0.687639	0.920092	no
Glyma01g06121	Glyma01g06121	Glyma01g06121	Gm01:6021842-6025894	14-7-0	2014-07-07	NOTEST	0	0	0	0	1	1	no
Glyma01g06131	Glyma01g06131	Glyma01g06131	Gm01:6027072-6027783	14-7-0	2014-07-07	NOTEST	0	0	0	0	1	1	no
Glyma01g06140	Glyma01g06140	Glyma01g06140	Gm01:6036836-6042396	14-7-0	2014-07-07	NOTEST	0	0	0	0	1	1	no
Glyma01g06150	Glyma01g06150	Glyma01g06150	Gm01:6047154-6049059	14-7-0	2014-07-07	NOTEST	0.297448	0.375042	0.334414	-0.295332	0.76774	1	no
Glyma01g06170	Glyma01g06170	Glyma01g06170	Gm01:6071138-6081550	14-7-0	2014-07-07	OK	23.0821	10.5908	-1.12397	1.74868	0.0803458	0.361403	no
Glyma01g06181	Glyma01g06181	Glyma01g06181	Gm01:6100672-6102037	14-7-0	2014-07-07	NOTEST	0	0	0	0	1	1	no
Glyma01g06192	Glyma01g06192	Glyma01g06192	Gm01:6238679-6240315	14-7-0	2014-07-07	NOTEST	0	0	0	0	1	1	no
Glyma01g06203	Glyma01g06203	Glyma01g06203	Gm01:6266528-6267750	14-7-0	2014-07-07	NOTEST	0	0	0	0	1	1	no
Glyma01g06214	Glyma01g06214	Glyma01g06214	Gm01:6283658-6285214	14-7-0	2014-07-07	NOTEST	0	0	0	0	1	1	no
Glyma01g06226	Glyma01g06226	Glyma01g06226	Gm01:6285502-6288118	14-7-0	2014-07-07	NOTEST	0	0	0	0	1	1	no
Glyma01g06238	Glyma01g06238	Glyma01g06238	Gm01:6291503-6292208	14-7-0	2014-07-07	NOTEST	0	0	0	0	1	1	no
Glyma01g06250	Glyma01g06250	Glyma01g06250	Gm01:6303783-6304910	14-7-0	2014-07-07	NOTEST	0	0	0	0	1	1	no
Glyma01g06255	Glyma01g06255	Glyma01g06255	Gm01:6305430-6306253	14-7-0	2014-07-07	NOTEST	0	0	0	0	1	1	no
Glyma01g06260	Glyma01g06260	Glyma01g06260	Gm01:6314251-6321822	14-7-0	2014-07-07	OK	9.29931	6.70118	-0.472709	0.722256	0.470137	0.818601	no
Glyma01g06265	Glyma01g06265	Glyma01g06265	Gm01:6323487-6330290	14-7-0	2014-07-07	OK	0.653637	0.180748	-1.85451	2.1553	0.0311386	0.211001	no
Glyma01g06270	Glyma01g06270	Glyma01g06270	Gm01:6353278-6357024	14-7-0	2014-07-07	OK	7.14091	4.21601	-0.760229	1.14965	0.250287	0.638504	no
Glyma01g06281	Glyma01g06281	Glyma01g06281	Gm01:6358175-6364839	14-7-0	2014-07-07	OK	0.77256	1.29017	0.739842	-0.891154	0.372847	0.754678	no
Glyma01g06290	Glyma01g06290	Glyma01g06290	Gm01:6415709-6426123	14-7-0	2014-07-07	OK	4.16213	3.82669	-0.121227	0.186899	0.85174	0.966078	no
Glyma01g06300	Glyma01g06300	Glyma01g06300	Gm01:6427320-6430789	14-7-0	2014-07-07	OK	3.19296	6.60212	1.04803	-1.56251	0.118169	0.44667	no
Glyma01g06320	Glyma01g06320	Glyma01g06320	Gm01:6438347-6443201	14-7-0	2014-07-07	OK	2.88388	4.04864	0.489425	-0.65687	0.511265	0.842647	no
Glyma01g06330	Glyma01g06330	Glyma01g06330	Gm01:6463489-6464681	14-7-0	2014-07-07	NOTEST	0	0	0	0	1	1	no
Glyma01g06350	Glyma01g06350	Glyma01g06350	Gm01:6519357-6525574	14-7-0	2014-07-07	NOTEST	0	0	0	0	1	1	no
Glyma01g06370	Glyma01g06370	Glyma01g06370	Gm01:6606759-6612290	14-7-0	2014-07-07	OK	0.602816	0.145889	-2.04684	2.12676	0.0334397	0.219113	no
Glyma01g06380	Glyma01g06380	Glyma01g06380	Gm01:6619142-6624870	14-7-0	2014-07-07	OK	5.76612	4.15585	-0.472459	0.659932	0.509297	0.841749	no
Glyma01g06403	Glyma01g06403	Glyma01g06403	Gm01:6653831-6654651	14-7-0	2014-07-07	NOTEST	0	0	0	0	1	1	no
Glyma01g06426	Glyma01g06426	Glyma01g06426	Gm01:6655568-6658132	14-7-0	2014-07-07	NOTEST	0	0	0	0	1	1	no
Glyma01g06450	Glyma01g06450	Glyma01g06450	Gm01:6697229-6704493	14-7-0	2014-07-07	OK	3.3283	4.10106	0.301209	-0.492312	0.622499	0.898554	no
Glyma01g06465	Glyma01g06465	Glyma01g06465	Gm01:6734268-6734951	14-7-0	2014-07-07	NOTEST	0	0	0	0	1	1	no
Glyma01g06480	Glyma01g06480	Glyma01g06480	Gm01:6737090-6743586	14-7-0	2014-07-07	OK	1.03627	0.392069	-1.40222	1.24172	0.214341	0.594651	no
Glyma01g06530	Glyma01g06530	Glyma01g06530	Gm01:6773745-6780125	14-7-0	2014-07-07	NOTEST	0.0340218	0.0252824	-0.428322	0.158442	0.874109	1	no
Glyma01g06540	Glyma01g06540	Glyma01g06540	Gm01:6785070-6791180	14-7-0	2014-07-07	OK	4.98844	2.43213	-1.03637	1.29593	0.195	0.569002	no
Glyma01g06550	Glyma01g06550	Glyma01g06550	Gm01:6797682-6802949	14-7-0	2014-07-07	OK	0.809212	1.24328	0.61956	-0.736347	0.46152	0.813127	no
Glyma01g06575	Glyma01g06575	Glyma01g06575	Gm01:6821946-6822491	14-7-0	2014-07-07	NOTEST	0	0	0	0	1	1	no
Glyma01g06600	Glyma01g06600	Glyma01g06600	Gm01:6945949-6947844	14-7-0	2014-07-07	OK	8.7339	6.57593	-0.409431	0.537781	0.590728	0.885241	no
Glyma01g06610	Glyma01g06610	Glyma01g06610	Gm01:6949449-6956726	14-7-0	2014-07-07	NOTEST	0.0585916	0.0889858	0.602882	-0.233691	0.815225	1	no
Glyma01g06620	Glyma01g06620	Glyma01g06620	Gm01:6963802-6967415	14-7-0	2014-07-07	OK	1.80292	8.91502	2.3059	-3.08806	0.00201466	0.0363552	yes
Glyma01g06630	Glyma01g06630	Glyma01g06630	Gm01:6987088-6990503	14-7-0	2014-07-07	OK	6.70567	5.76597	-0.217819	0.322823	0.746829	0.937805	no
Glyma01g06640	Glyma01g06640	Glyma01g06640	Gm01:6992005-6995011	14-7-0	2014-07-07	OK	0.137293	2.27806	4.05248	-3.61994	0.000294671	0.00946003	yes
Glyma01g06660	Glyma01g06660	Glyma01g06660	Gm01:7007301-7012903	14-7-0	2014-07-07	NOTEST	0.0648346	0	-1.79769e+308	-1.79769e+308	0.120051	1	no
Glyma01g06671	Glyma01g06671	Glyma01g06671	Gm01:7051709-7055503	14-7-0	2014-07-07	NOTEST	0	0	0	0	1	1	no
Glyma01g06681	Glyma01g06681	Glyma01g06681	Gm01:7074917-7078717	14-7-0	2014-07-07	OK	2.77226	4.08568	0.559511	-0.926663	0.354102	0.741513	no
Glyma01g06690	Glyma01g06690	Glyma01g06690	Gm01:7089055-7091542	14-7-0	2014-07-07	OK	0.232108	0.719306	1.63181	-1.67125	0.0946717	0.39614	no
Glyma01g06700	Glyma01g06700	Glyma01g06700	Gm01:7093539-7097353	14-7-0	2014-07-07	OK	2.61045	1.43089	-0.867384	1.05366	0.292037	0.685751	no
Glyma01g06720	Glyma01g06720	Glyma01g06720	Gm01:7128540-7130153	14-7-0	2014-07-07	NOTEST	0	0	0	0	1	1	no
Glyma01g06730	Glyma01g06730	Glyma01g06730	Gm01:7131214-7140582	14-7-0	2014-07-07	OK	0.836936	1.68356	1.00833	-1.27828	0.201151	0.577929	no
Glyma01g06740	Glyma01g06740	Glyma01g06740	Gm01:7146652-7148230	14-7-0	2014-07-07	OK	60.9943	40.4339	-0.593107	0.833963	0.404302	0.77711	no
Glyma01g06750	Glyma01g06750	Glyma01g06750	Gm01:7149379-7152784	14-7-0	2014-07-07	OK	4.95914	4.77847	-0.0535414	0.0724831	0.942217	0.988502	no
Glyma01g06762	Glyma01g06762	Glyma01g06762	Gm01:7159103-7161168	14-7-0	2014-07-07	NOTEST	0	0	0	0	1	1	no
Glyma01g06774	Glyma01g06774	Glyma01g06774	Gm01:7193728-7195967	14-7-0	2014-07-07	NOTEST	0.0471604	0.0400908	-0.234304	0.0732454	0.941611	1	no
Glyma01g06787	Glyma01g06787	Glyma01g06787	Gm01:7202426-7203771	14-7-0	2014-07-07	OK	1.49181	1.63573	0.13287	-0.127981	0.898164	0.977979	no
Glyma01g06800	Glyma01g06800	Glyma01g06800	Gm01:7209667-7216248	14-7-0	2014-07-07	OK	4.29307	3.33263	-0.365347	0.49721	0.619041	0.897901	no
Glyma01g06810	Glyma01g06810	Glyma01g06810	Gm01:7209667-7216248	14-7-0	2014-07-07	OK	0.183427	1.31393	2.84061	-0.87889	0.379461	0.75964	no
Glyma01g06820	Glyma01g06820	Glyma01g06820	Gm01:7217423-7219310	14-7-0	2014-07-07	NOTEST	0.547543	0.430191	-0.347995	0.304161	0.761005	1	no
Glyma01g06830	Glyma01g06830	Glyma01g06830	Gm01:7247591-7249157	14-7-0	2014-07-07	NOTEST	0	0	0	0	1	1	no
Glyma01g06840	Glyma01g06840	Glyma01g06840	Gm01:7250230-7254936	14-7-0	2014-07-07	OK	7.04268	13.4159	0.929746	-1.52954	0.126131	0.461791	no
Glyma01g06850	Glyma01g06850	Glyma01g06850	Gm01:7272747-7275098	14-7-0	2014-07-07	OK	0.868582	1.27717	0.556216	-0.614259	0.539044	0.858548	no
Glyma01g06860	Glyma01g06860	Glyma01g06860	Gm01:7277818-7281645	14-7-0	2014-07-07	NOTEST	0	0	0	0	1	1	no
Glyma01g06870	Glyma01g06870	Glyma01g06870	Gm01:7343212-7351310	14-7-0	2014-07-07	OK	0.959811	1.96809	1.03598	-0.952038	0.341078	0.729684	no
Glyma01g06880	Glyma01g06880	Glyma01g06880	Gm01:7358248-7360930	14-7-0	2014-07-07	NOTEST	0.058689	0.0429133	-0.451668	0.306856	0.758953	1	no
Glyma01g06902	Glyma01g06902	Glyma01g06902	Gm01:7382653-7384804	14-7-0	2014-07-07	NOTEST	0	0	0	0	1	1	no
Glyma01g06924	Glyma01g06924	Glyma01g06924	Gm01:7422342-7427765	14-7-0	2014-07-07	NOTEST	0	0	0	0	1	1	no
Glyma01g06947	Glyma01g06947	Glyma01g06947	Gm01:7435646-7436810	14-7-0	2014-07-07	NOTEST	0	0	0	0	1	1	no
Glyma01g06970	Glyma01g06970	Glyma01g06970	Gm01:7479447-7482232	14-7-0	2014-07-07	OK	7.66679	11.6795	0.607287	-1.02424	0.305721	0.698647	no
Glyma01g06980	Glyma01g06980	Glyma01g06980	Gm01:7497548-7505696	14-7-0	2014-07-07	NOTEST	0	0	0	0	1	1	no
Glyma01g06995	Glyma01g06995	Glyma01g06995	Gm01:7509309-7511663	14-7-0	2014-07-07	NOTEST	0	0	0	0	1	1	no
Glyma01g07010	Glyma01g07010	Glyma01g07010	Gm01:7546180-7550537	14-7-0	2014-07-07	OK	9.87824	5.4161	-0.867002	1.33694	0.181242	0.54892	no
Glyma01g07020	Glyma01g07020	Glyma01g07020	Gm01:7562682-7571075	14-7-0	2014-07-07	OK	0.42632	1.20463	1.49858	-1.14464	0.252357	0.640743	no
Glyma01g07040	Glyma01g07040	Glyma01g07040	Gm01:7573115-7574981	14-7-0	2014-07-07	OK	0.712004	0.755826	0.0861695	-0.0949015	0.924393	0.983182	no
Glyma01g07046	Glyma01g07046	Glyma01g07046	Gm01:7576240-7581159	14-7-0	2014-07-07	NOTEST	0.227802	0	-1.79769e+308	-1.79769e+308	0.052437	1	no
Glyma01g07053	Glyma01g07053	Glyma01g07053	Gm01:7587960-7591978	14-7-0	2014-07-07	NOTEST	0	0	0	0	1	1	no
Glyma01g07060	Glyma01g07060	Glyma01g07060	Gm01:7606030-7608993	14-7-0	2014-07-07	NOTEST	0	0	0	0	1	1	no
Glyma01g07070	Glyma01g07070	Glyma01g07070	Gm01:7614281-7618124	14-7-0	2014-07-07	OK	3.50643	7.41067	1.0796	-1.64522	0.0999247	0.406616	no
Glyma01g07080	Glyma01g07080	Glyma01g07080	Gm01:7621975-7627809	14-7-0	2014-07-07	OK	4.9879	3.75928	-0.407976	0.278352	0.780742	0.947747	no
Glyma01g07091	Glyma01g07091	Glyma01g07091	Gm01:7621975-7627809	14-7-0	2014-07-07	OK	1.12665	3.65797	1.69901	-1.92623	0.0540753	0.287679	no
Glyma01g07100	Glyma01g07100	Glyma01g07100	Gm01:7645596-7648115	14-7-0	2014-07-07	OK	29.7463	22.7826	-0.384779	0.647495	0.517312	0.84651	no
Glyma01g07110	Glyma01g07110	Glyma01g07110	Gm01:7657795-7664672	14-7-0	2014-07-07	NOTEST	0	0.137726	1.79769e+308	1.79769e+308	0.0584311	1	no
Glyma01g07120	Glyma01g07120	Glyma01g07120	Gm01:7694027-7700472	14-7-0	2014-07-07	OK	18.1525	20.4766	0.173807	-0.241175	0.80942	0.954896	no
Glyma01g07130	Glyma01g07130	Glyma01g07130	Gm01:7726769-7727260	14-7-0	2014-07-07	OK	846.172	168.143	-2.33126	3.6176	0.000297343	0.00951591	yes
Glyma01g07140	Glyma01g07140	Glyma01g07140	Gm01:7745867-7748795	14-7-0	2014-07-07	OK	0.708211	1.24129	0.809592	-0.93163	0.351528	0.738877	no
Glyma01g07150	Glyma01g07150	Glyma01g07150	Gm01:7755456-7755710	14-7-0	2014-07-07	NOTEST	0	0	0	0	1	1	no
Glyma01g07155	Glyma01g07155	Glyma01g07155	Gm01:7761366-7761600	14-7-0	2014-07-07	NOTEST	0	0	0	0	1	1	no
Glyma01g07160	Glyma01g07160	Glyma01g07160	Gm01:7762334-7764158	14-7-0	2014-07-07	OK	0.391494	1.06789	1.4477	-1.46571	0.142728	0.491568	no
Glyma01g07175	Glyma01g07175	Glyma01g07175	Gm01:7777226-7781079	14-7-0	2014-07-07	OK	4.6623	2.29418	-1.02306	1.46215	0.143699	0.493632	no
Glyma01g07190	Glyma01g07190	Glyma01g07190	Gm01:7781287-7786746	14-7-0	2014-07-07	OK	1.45435	1.9165	0.398106	-0.404325	0.685974	0.919941	no
Glyma01g07212	Glyma01g07212	Glyma01g07212	Gm01:7794008-7794422	14-7-0	2014-07-07	NOTEST	0	0	0	0	1	1	no
Glyma01g07234	Glyma01g07234	Glyma01g07234	Gm01:7804303-7805165	14-7-0	2014-07-07	NOTEST	0.168065	0.21875	0.380266	-0.263343	0.792286	1	no
Glyma01g07256	Glyma01g07256	Glyma01g07256	Gm01:7805183-7807029	14-7-0	2014-07-07	NOTEST	0	0	0	0	1	1	no
Glyma01g07278	Glyma01g07278	Glyma01g07278	Gm01:7894471-7899056	14-7-0	2014-07-07	NOTEST	0	0	0	0	1	1	no
Glyma01g07300	Glyma01g07300	Glyma01g07300	Gm01:7959018-7960497	14-7-0	2014-07-07	OK	0.292784	1.13589	1.95591	-1.85889	0.0630432	0.315411	no
Glyma01g07310	Glyma01g07310	Glyma01g07310	Gm01:7961184-7963298	14-7-0	2014-07-07	OK	5.5352	1.91825	-1.52884	1.73875	0.0820779	0.365837	no
Glyma01g07320	Glyma01g07320	Glyma01g07320	Gm01:7976530-7977692	14-7-0	2014-07-07	NOTEST	0	0	0	0	1	1	no
Glyma01g07343	Glyma01g07343	Glyma01g07343	Gm01:8062113-8062653	14-7-0	2014-07-07	NOTEST	0	0	0	0	1	1	no
Glyma01g07366	Glyma01g07366	Glyma01g07366	Gm01:8067733-8073984	14-7-0	2014-07-07	NOTEST	0	0	0	0	1	1	no
Glyma01g07390	Glyma01g07390	Glyma01g07390	Gm01:8081945-8087022	14-7-0	2014-07-07	OK	0.9321	0.424687	-1.13409	1.09145	0.275076	0.666473	no
Glyma01g07416	Glyma01g07416	Glyma01g07416	Gm01:8182612-8184549	14-7-0	2014-07-07	NOTEST	0	0	0	0	1	1	no
Glyma01g07443	Glyma01g07443	Glyma01g07443	Gm01:8199812-8203907	14-7-0	2014-07-07	NOTEST	0	0	0	0	1	1	no
Glyma01g07470	Glyma01g07470	Glyma01g07470	Gm01:8280629-8281870	14-7-0	2014-07-07	NOTEST	0	0	0	0	1	1	no
Glyma01g07500	Glyma01g07500	Glyma01g07500	Gm01:8288472-8290635	14-7-0	2014-07-07	NOTEST	0	0	0	0	1	1	no
Glyma01g07530	Glyma01g07530	Glyma01g07530	Gm01:8321044-8331324	14-7-0	2014-07-07	OK	1.45878	2.71032	0.8937	-1.30286	0.192621	0.565801	no
Glyma01g07542	Glyma01g07542	Glyma01g07542	Gm01:8338977-8341376	14-7-0	2014-07-07	NOTEST	0.525466	0.297492	-0.820746	0.713254	0.475688	1	no
Glyma01g07554	Glyma01g07554	Glyma01g07554	Gm01:8344184-8347552	14-7-0	2014-07-07	OK	29.3875	23.2602	-0.337337	0.569068	0.56931	0.874797	no
Glyma01g07567	Glyma01g07567	Glyma01g07567	Gm01:8348953-8350397	14-7-0	2014-07-07	OK	0.0670642	4.62779	6.10864	-4.29564	1.7419e-05	0.00110569	yes
Glyma01g07580	Glyma01g07580	Glyma01g07580	Gm01:8387061-8389448	14-7-0	2014-07-07	OK	3.75926	8.72576	1.21483	-1.97713	0.0480271	0.268307	no
Glyma01g07601	Glyma01g07601	Glyma01g07601	Gm01:8400738-8401869	14-7-0	2014-07-07	NOTEST	0	0	0	0	1	1	no
Glyma01g07621	Glyma01g07621	Glyma01g07621	Gm01:8410014-8411417	14-7-0	2014-07-07	NOTEST	0	0	0	0	1	1	no
Glyma01g07641	Glyma01g07641	Glyma01g07641	Gm01:8426105-8455213	14-7-0	2014-07-07	OK	4.37556	2.7133	-0.68942	1.11342	0.26553	0.655607	no
Glyma01g07661	Glyma01g07661	Glyma01g07661	Gm01:8426105-8455213	14-7-0	2014-07-07	NOTEST	0.0835554	0.0607313	-0.460293	0.0798816	0.936331	1	no
Glyma01g07680	Glyma01g07680	Glyma01g07680	Gm01:8471437-8478753	14-7-0	2014-07-07	OK	3.85276	2.55133	-0.594643	0.996832	0.318846	0.709839	no
Glyma01g07690	Glyma01g07690	Glyma01g07690	Gm01:8483094-8485802	14-7-0	2014-07-07	OK	1.37021	0.316801	-2.11275	2.44009	0.0146834	0.136006	no
Glyma01g07716	Glyma01g07716	Glyma01g07716	Gm01:8488370-8491061	14-7-0	2014-07-07	NOTEST	0	0	0	0	1	1	no
Glyma01g07743	Glyma01g07743	Glyma01g07743	Gm01:8512443-8513748	14-7-0	2014-07-07	NOTEST	0	0	0	0	1	1	no
Glyma01g07770	Glyma01g07770	Glyma01g07770	Gm01:8571080-8576705	14-7-0	2014-07-07	OK	15.3773	6.61757	-1.21643	1.95354	0.0507552	0.278169	no
Glyma01g07780	Glyma01g07780	Glyma01g07780	Gm01:8580150-8584320	14-7-0	2014-07-07	OK	4.08701	6.54851	0.68012	-1.11192	0.266171	0.655886	no
Glyma01g07791	Glyma01g07791	Glyma01g07791	Gm01:8585310-8588909	14-7-0	2014-07-07	OK	0.916052	0.7231	-0.341235	0.350139	0.726235	0.931661	no
Glyma01g07800	Glyma01g07800	Glyma01g07800	Gm01:8594093-8595436	14-7-0	2014-07-07	OK	10.2778	4.73673	-1.11757	1.70863	0.0875194	0.379796	no
Glyma01g07860	Glyma01g07860	Glyma01g07860	Gm01:8667868-8673493	14-7-0	2014-07-07	NOTEST	0.0336718	0.349222	3.37453	-2.23264	0.0255727	1	no
Glyma01g07876	Glyma01g07876	Glyma01g07876	Gm01:8788410-8789743	14-7-0	2014-07-07	NOTEST	0	0.0252561	1.79769e+308	1.79769e+308	0.298832	1	no
Glyma01g07893	Glyma01g07893	Glyma01g07893	Gm01:8792135-8793707	14-7-0	2014-07-07	NOTEST	0	0	0	0	1	1	no
Glyma01g07910	Glyma01g07910	Glyma01g07910	Gm01:8838722-8843110	14-7-0	2014-07-07	NOTEST	0	0.0273321	1.79769e+308	1.79769e+308	0.0980491	1	no
Glyma01g07930	Glyma01g07930	Glyma01g07930	Gm01:8874759-8878203	14-7-0	2014-07-07	OK	3.8453	15.6476	2.02478	-3.17291	0.00150921	0.0296988	yes
Glyma01g07940	Glyma01g07940	Glyma01g07940	Gm01:8910470-8913789	14-7-0	2014-07-07	OK	0.443907	2.09911	2.24145	-2.55409	0.0106465	0.110577	no
Glyma01g07970	Glyma01g07970	Glyma01g07970	Gm01:8936938-8942561	14-7-0	2014-07-07	NOTEST	0	0	0	0	1	1	no
Glyma01g07985	Glyma01g07985	Glyma01g07985	Gm01:8949064-8950284	14-7-0	2014-07-07	NOTEST	0	0	0	0	1	1	no
Glyma01g08001	Glyma01g08001	Glyma01g08001	Gm01:8978273-8979785	14-7-0	2014-07-07	NOTEST	0	0	0	0	1	1	no
Glyma01g08015	Glyma01g08015	Glyma01g08015	Gm01:8998365-8999926	14-7-0	2014-07-07	NOTEST	0	0	0	0	1	1	no
Glyma01g08030	Glyma01g08030	Glyma01g08030	Gm01:9017676-9019966	14-7-0	2014-07-07	NOTEST	0	0	0	0	1	1	no
Glyma01g08043	Glyma01g08043	Glyma01g08043	Gm01:9021976-9042121	14-7-0	2014-07-07	OK	0.778338	1.06114	0.447143	-0.640343	0.52195	0.849117	no
Glyma01g08056	Glyma01g08056	Glyma01g08056	Gm01:9051046-9057050	14-7-0	2014-07-07	OK	2.85057	1.15143	-1.30782	1.71711	0.0859587	0.376057	no
Glyma01g08070	Glyma01g08070	Glyma01g08070	Gm01:9109611-9110650	14-7-0	2014-07-07	NOTEST	0	0	0	0	1	1	no
Glyma01g08080	Glyma01g08080	Glyma01g08080	Gm01:9174134-9176210	14-7-0	2014-07-07	OK	0.561761	0.668895	0.251822	-0.267856	0.78881	0.949626	no
Glyma01g08096	Glyma01g08096	Glyma01g08096	Gm01:9198539-9199466	14-7-0	2014-07-07	NOTEST	0	0	0	0	1	1	no
Glyma01g08113	Glyma01g08113	Glyma01g08113	Gm01:9252869-9254570	14-7-0	2014-07-07	NOTEST	0	0	0	0	1	1	no
Glyma01g08130	Glyma01g08130	Glyma01g08130	Gm01:9331637-9344994	14-7-0	2014-07-07	NOTEST	0	0	0	0	1	1	no
Glyma01g08150	Glyma01g08150	Glyma01g08150	Gm01:9446809-9451393	14-7-0	2014-07-07	NOTEST	0.0547671	0.371937	2.76368	-1.79058	0.0733609	1	no
Glyma01g08191	Glyma01g08191	Glyma01g08191	Gm01:9525972-9529696	14-7-0	2014-07-07	NOTEST	0	0	0	0	1	1	no
Glyma01g08230	Glyma01g08230	Glyma01g08230	Gm01:9575252-9581967	14-7-0	2014-07-07	OK	4.07107	3.69667	-0.139183	0.21966	0.826136	0.95905	no
Glyma01g08250	Glyma01g08250	Glyma01g08250	Gm01:9636460-9637409	14-7-0	2014-07-07	NOTEST	0	0	0	0	1	1	no
Glyma01g08260	Glyma01g08260	Glyma01g08260	Gm01:9642089-9646537	14-7-0	2014-07-07	OK	0.47009	1.39992	1.57434	-1.36249	0.173044	0.540479	no
Glyma01g08400	Glyma01g08400	Glyma01g08400	Gm01:9844796-9845510	14-7-0	2014-07-07	NOTEST	0	0	0	0	1	1	no
Glyma01g08540	Glyma01g08540	Glyma01g08540	Gm01:9914169-9919593	14-7-0	2014-07-07	OK	2.95421	2.52423	-0.226932	0.29465	0.768261	0.944107	no
Glyma01g08560	Glyma01g08560	Glyma01g08560	Gm01:9947412-9949603	14-7-0	2014-07-07	NOTEST	0	0	0	0	1	1	no
Glyma01g08580	Glyma01g08580	Glyma01g08580	Gm01:9980287-9986041	14-7-0	2014-07-07	OK	7.64628	8.47461	0.148389	-0.245162	0.806331	0.953761	no
Glyma01g08586	Glyma01g08586	Glyma01g08586	Gm01:10000985-10002625	14-7-0	2014-07-07	NOTEST	0	0	0	0	1	1	no
Glyma01g08593	Glyma01g08593	Glyma01g08593	Gm01:10003770-10020103	14-7-0	2014-07-07	NOTEST	0	0	0	0	1	1	no
Glyma01g08600	Glyma01g08600	Glyma01g08600	Gm01:10022026-10027778	14-7-0	2014-07-07	OK	9.98773	11.4565	0.197936	-0.304321	0.760884	0.941782	no
Glyma01g08610	Glyma01g08610	Glyma01g08610	Gm01:10032095-10036624	14-7-0	2014-07-07	NOTEST	0	0	0	0	1	1	no
Glyma01g08621	Glyma01g08621	Glyma01g08621	Gm01:10051789-10059800	14-7-0	2014-07-07	NOTEST	0	0	0	0	1	1	no
Glyma01g08631	Glyma01g08631	Glyma01g08631	Gm01:10051789-10059800	14-7-0	2014-07-07	NOTEST	0	0	0	0	1	1	no
Glyma01g08640	Glyma01g08640	Glyma01g08640	Gm01:10086673-10091927	14-7-0	2014-07-07	NOTEST	0	0.0301654	1.79769e+308	1.79769e+308	0.118659	1	no
Glyma01g08650	Glyma01g08650	Glyma01g08650	Gm01:10086673-10091927	14-7-0	2014-07-07	NOTEST	0	0	0	0	1	1	no
Glyma01g08690	Glyma01g08690	Glyma01g08690	Gm01:10142572-10144504	14-7-0	2014-07-07	NOTEST	0	0	0	0	1	1	no
Glyma01g08730	Glyma01g08730	Glyma01g08730	Gm01:10288660-10290556	14-7-0	2014-07-07	NOTEST	0	0	0	0	1	1	no
Glyma01g08745	Glyma01g08745	Glyma01g08745	Gm01:10293654-10294541	14-7-0	2014-07-07	NOTEST	0	0	0	0	1	1	no
Glyma01g08760	Glyma01g08760	Glyma01g08760	Gm01:10355582-10357514	14-7-0	2014-07-07	NOTEST	0	0	0	0	1	1	no
Glyma01g08870	Glyma01g08870	Glyma01g08870	Gm01:10370136-10371995	14-7-0	2014-07-07	NOTEST	0	0	0	0	1	1	no
Glyma01g08980	Glyma01g08980	Glyma01g08980	Gm01:10504878-10510246	14-7-0	2014-07-07	NOTEST	0	0	0	0	1	1	no
Glyma01g09000	Glyma01g09000	Glyma01g09000	Gm01:10570987-10572412	14-7-0	2014-07-07	NOTEST	0	0	0	0	1	1	no
Glyma01g09010	Glyma01g09010	Glyma01g09010	Gm01:10577946-10583595	14-7-0	2014-07-07	OK	6.02972	9.02663	0.582096	-0.786424	0.431619	0.796209	no
Glyma01g09040	Glyma01g09040	Glyma01g09040	Gm01:10601638-10602621	14-7-0	2014-07-07	NOTEST	0	0	0	0	1	1	no
Glyma01g09066	Glyma01g09066	Glyma01g09066	Gm01:10604268-10604624	14-7-0	2014-07-07	NOTEST	0	0	0	0	1	1	no
Glyma01g09093	Glyma01g09093	Glyma01g09093	Gm01:10716118-10717174	14-7-0	2014-07-07	NOTEST	0	0	0	0	1	1	no
Glyma01g09120	Glyma01g09120	Glyma01g09120	Gm01:10765526-10768563	14-7-0	2014-07-07	OK	6.06783	8.39333	0.468064	-0.791034	0.428924	0.794248	no
Glyma01g09160	Glyma01g09160	Glyma01g09160	Gm01:10877246-10880169	14-7-0	2014-07-07	OK	1.59875	2.98418	0.900393	-1.21856	0.223012	0.606222	no
Glyma01g09190	Glyma01g09190	Glyma01g09190	Gm01:10916139-10919654	14-7-0	2014-07-07	NOTEST	0	0	0	0	1	1	no
Glyma01g09205	Glyma01g09205	Glyma01g09205	Gm01:10925539-10932891	14-7-0	2014-07-07	OK	2.45787	0.55066	-2.15818	2.20843	0.027214	0.19447	no
Glyma01g09220	Glyma01g09220	Glyma01g09220	Gm01:10985768-10988999	14-7-0	2014-07-07	OK	1.987	2.97693	0.583231	-0.802062	0.422517	0.790111	no
Glyma01g09251	Glyma01g09251	Glyma01g09251	Gm01:11062433-11064112	14-7-0	2014-07-07	NOTEST	0	0	0	0	1	1	no
Glyma01g09280	Glyma01g09280	Glyma01g09280	Gm01:11172148-11173850	14-7-0	2014-07-07	NOTEST	0	0	0	0	1	1	no
Glyma01g09290	Glyma01g09290	Glyma01g09290	Gm01:11208547-11216038	14-7-0	2014-07-07	OK	3.71705	4.82949	0.377712	-0.576772	0.564094	0.871921	no
Glyma01g09310	Glyma01g09310	Glyma01g09310	Gm01:11247803-11256961	14-7-0	2014-07-07	OK	53.93	49.3101	-0.129205	0.188126	0.850778	0.965502	no
Glyma01g09340	Glyma01g09340	Glyma01g09340	Gm01:11290152-11290409	14-7-0	2014-07-07	NOTEST	0	0	0	0	1	1	no
Glyma01g09350	Glyma01g09350	Glyma01g09350	Gm01:11294639-11296592	14-7-0	2014-07-07	NOTEST	0	0	0	0	1	1	no
Glyma01g09360	Glyma01g09360	Glyma01g09360	Gm01:11308064-11312690	14-7-0	2014-07-07	OK	0.114743	0.814024	2.82666	-2.39138	0.0167854	0.147077	no
Glyma01g09381	Glyma01g09381	Glyma01g09381	Gm01:11366555-11369128	14-7-0	2014-07-07	NOTEST	0	0	0	0	1	1	no
Glyma01g09400	Glyma01g09400	Glyma01g09400	Gm01:11464172-11469476	14-7-0	2014-07-07	OK	5.28666	3.20585	-0.721649	1.02162	0.30696	0.699741	no
Glyma01g09410	Glyma01g09410	Glyma01g09410	Gm01:11464172-11469476	14-7-0	2014-07-07	NOTEST	0	0	0	0	1	1	no
Glyma01g09420	Glyma01g09420	Glyma01g09420	Gm01:11496634-11503018	14-7-0	2014-07-07	OK	2.27641	1.64628	-0.467549	0.654713	0.512653	0.843767	no
Glyma01g09460	Glyma01g09460	Glyma01g09460	Gm01:11555183-11556227	14-7-0	2014-07-07	NOTEST	0.213818	0.447947	1.06694	-0.827416	0.408001	1	no
Glyma01g09481	Glyma01g09481	Glyma01g09481	Gm01:11560220-11561128	14-7-0	2014-07-07	NOTEST	0	0	0	0	1	1	no
Glyma01g09500	Glyma01g09500	Glyma01g09500	Gm01:11608787-11608970	14-7-0	2014-07-07	NOTEST	0	0	0	0	1	1	no
Glyma01g09510	Glyma01g09510	Glyma01g09510	Gm01:11675230-11676337	14-7-0	2014-07-07	NOTEST	0	0	0	0	1	1	no
Glyma01g09515	Glyma01g09515	Glyma01g09515	Gm01:11687514-11688465	14-7-0	2014-07-07	NOTEST	0	0	0	0	1	1	no
Glyma01g09520	Glyma01g09520	Glyma01g09520	Gm01:11695475-11701510	14-7-0	2014-07-07	OK	16.7529	19.7005	0.233821	-0.384737	0.700433	0.923804	no
Glyma01g09530	Glyma01g09530	Glyma01g09530	Gm01:11703243-11703468	14-7-0	2014-07-07	OK	4.72337	5.56659	0.236976	-0.114637	0.908733	0.979911	no
Glyma01g09540	Glyma01g09540	Glyma01g09540	Gm01:11708034-11708550	14-7-0	2014-07-07	NOTEST	0	0	0	0	1	1	no
Glyma01g09581	Glyma01g09581	Glyma01g09581	Gm01:11738401-11738872	14-7-0	2014-07-07	NOTEST	0	0	0	0	1	1	no
Glyma01g09620	Glyma01g09620	Glyma01g09620	Gm01:11916861-11920298	14-7-0	2014-07-07	NOTEST	0	0	0	0	1	1	no
Glyma01g09631	Glyma01g09631	Glyma01g09631	Gm01:11934522-11935027	14-7-0	2014-07-07	NOTEST	0	0	0	0	1	1	no
Glyma01g09640	Glyma01g09640	Glyma01g09640	Gm01:11967121-11968573	14-7-0	2014-07-07	OK	3.02035	2.23436	-0.434854	0.569009	0.56935	0.874797	no
Glyma01g09650	Glyma01g09650	Glyma01g09650	Gm01:11971139-11974007	14-7-0	2014-07-07	NOTEST	0	0.254603	1.79769e+308	1.79769e+308	0.0469445	1	no
Glyma01g09660	Glyma01g09660	Glyma01g09660	Gm01:11996466-12008222	14-7-0	2014-07-07	OK	2.14824	1.05013	-1.03259	1.38991	0.164556	0.52699	no
Glyma01g09860	Glyma01g09860	Glyma01g09860	Gm01:12384414-12385443	14-7-0	2014-07-07	NOTEST	0	0	0	0	1	1	no
Glyma01g09900	Glyma01g09900	Glyma01g09900	Gm01:12528614-12537191	14-7-0	2014-07-07	OK	1.02229	0.235472	-2.11818	1.90659	0.0565734	0.295465	no
Glyma01g09920	Glyma01g09920	Glyma01g09920	Gm01:12588417-12590126	14-7-0	2014-07-07	OK	3.49171	2.75084	-0.344064	0.474644	0.635041	0.903006	no
Glyma01g09948	Glyma01g09948	Glyma01g09948	Gm01:12598148-12598766	14-7-0	2014-07-07	NOTEST	0	0	0	0	1	1	no
Glyma01g09976	Glyma01g09976	Glyma01g09976	Gm01:12599050-12599537	14-7-0	2014-07-07	NOTEST	0	0	0	0	1	1	no
Glyma01g10004	Glyma01g10004	Glyma01g10004	Gm01:12745024-12746402	14-7-0	2014-07-07	NOTEST	0	0	0	0	1	1	no
Glyma01g10032	Glyma01g10032	Glyma01g10032	Gm01:12760733-12762383	14-7-0	2014-07-07	NOTEST	0	0	0	0	1	1	no
Glyma01g10060	Glyma01g10060	Glyma01g10060	Gm01:12803637-12806519	14-7-0	2014-07-07	NOTEST	0	0	0	0	1	1	no
Glyma01g10070	Glyma01g10070	Glyma01g10070	Gm01:12864161-12867113	14-7-0	2014-07-07	LOWDATA	0	0	-1.79769e+308	0	1	1	no
Glyma01g10081	Glyma01g10081	Glyma01g10081	Gm01:12864161-12867113	14-7-0	2014-07-07	OK	344.865	66.5348	-2.37385	3.09965	0.00193751	0.0353164	yes
Glyma01g10090	Glyma01g10090	Glyma01g10090	Gm01:12870303-12870537	14-7-0	2014-07-07	NOTEST	0	0	0	0	1	1	no
Glyma01g10100	Glyma01g10100	Glyma01g10100	Gm01:12915879-12921146	14-7-0	2014-07-07	OK	1.34872	1.00239	-0.428142	0.573664	0.566195	0.872793	no
Glyma01g10121	Glyma01g10121	Glyma01g10121	Gm01:13008740-13009964	14-7-0	2014-07-07	NOTEST	0.125397	0	-1.79769e+308	-1.79769e+308	0.139932	1	no
Glyma01g10141	Glyma01g10141	Glyma01g10141	Gm01:13045087-13045509	14-7-0	2014-07-07	NOTEST	0	0	0	0	1	1	no
Glyma01g10160	Glyma01g10160	Glyma01g10160	Gm01:13068289-13070591	14-7-0	2014-07-07	OK	0.868004	0.860449	-0.0126126	0.0122344	0.990239	0.998003	no
Glyma01g10183	Glyma01g10183	Glyma01g10183	Gm01:13094881-13100738	14-7-0	2014-07-07	NOTEST	0	0	0	0	1	1	no
Glyma01g10206	Glyma01g10206	Glyma01g10206	Gm01:13259515-13263715	14-7-0	2014-07-07	NOTEST	0	0	0	0	1	1	no
Glyma01g10231	Glyma01g10231	Glyma01g10231	Gm01:13305441-13308517	14-7-0	2014-07-07	NOTEST	0	0	0	0	1	1	no
Glyma01g10254	Glyma01g10254	Glyma01g10254	Gm01:13309389-13321481	14-7-0	2014-07-07	NOTEST	0.0277362	0.0376298	0.440102	-0.326405	0.744118	1	no
Glyma01g10278	Glyma01g10278	Glyma01g10278	Gm01:13324783-13327645	14-7-0	2014-07-07	NOTEST	0	0	0	0	1	1	no
Glyma01g10302	Glyma01g10302	Glyma01g10302	Gm01:13355409-13356481	14-7-0	2014-07-07	NOTEST	0	0	0	0	1	1	no
Glyma01g10326	Glyma01g10326	Glyma01g10326	Gm01:13416710-13417813	14-7-0	2014-07-07	NOTEST	0	0	0	0	1	1	no
Glyma01g10350	Glyma01g10350	Glyma01g10350	Gm01:13419562-13420937	14-7-0	2014-07-07	NOTEST	0	0	0	0	1	1	no
Glyma01g10371	Glyma01g10371	Glyma01g10371	Gm01:13433576-13434202	14-7-0	2014-07-07	OK	1.90156	0.820713	-1.21223	1.15129	0.249613	0.637496	no
Glyma01g10390	Glyma01g10390	Glyma01g10390	Gm01:13444506-13445181	14-7-0	2014-07-07	OK	1.27966	0.210331	-2.60503	1.47812	0.139375	0.486691	no
Glyma01g10600	Glyma01g10600	Glyma01g10600	Gm01:13782194-13783121	14-7-0	2014-07-07	NOTEST	0	0.268017	1.79769e+308	1.79769e+308	0.0539625	1	no
Glyma01g10610	Glyma01g10610	Glyma01g10610	Gm01:13795843-13799755	14-7-0	2014-07-07	OK	1.60321	2.61476	0.70571	-0.97414	0.329987	0.719404	no
Glyma01g10730	Glyma01g10730	Glyma01g10730	Gm01:13960625-13962588	14-7-0	2014-07-07	OK	0.403763	0.881436	1.12635	-0.832157	0.40532	0.777837	no
Glyma01g10850	Glyma01g10850	Glyma01g10850	Gm01:14070871-14087892	14-7-0	2014-07-07	OK	3.87723	1.9666	-0.979324	1.40227	0.160836	0.520923	no
Glyma01g10880	Glyma01g10880	Glyma01g10880	Gm01:14112119-14118766	14-7-0	2014-07-07	OK	1.85885	2.45067	0.398771	-0.523617	0.600545	0.889764	no
Glyma01g10900	Glyma01g10900	Glyma01g10900	Gm01:14129302-14130710	14-7-0	2014-07-07	NOTEST	0	0	0	0	1	1	no
Glyma01g11110	Glyma01g11110	Glyma01g11110	Gm01:14247142-14248189	14-7-0	2014-07-07	NOTEST	0	0	0	0	1	1	no
Glyma01g11130	Glyma01g11130	Glyma01g11130	Gm01:14320794-14324110	14-7-0	2014-07-07	NOTEST	0	0.113082	1.79769e+308	1.79769e+308	0.0980491	1	no
Glyma01g11180	Glyma01g11180	Glyma01g11180	Gm01:14568533-14568824	14-7-0	2014-07-07	OK	38673.5	26113.3	-0.566561	0.537921	0.590631	0.885187	no
Glyma01g11390	Glyma01g11390	Glyma01g11390	Gm01:14807028-14809655	14-7-0	2014-07-07	OK	18.9222	9.65384	-0.970906	1.5561	0.119685	0.449628	no
Glyma01g11473	Glyma01g11473	Glyma01g11473	Gm01:14947313-14947773	14-7-0	2014-07-07	NOTEST	0	0	0	0	1	1	no
Glyma01g11556	Glyma01g11556	Glyma01g11556	Gm01:14947841-14948129	14-7-0	2014-07-07	NOTEST	0	0	0	0	1	1	no
Glyma01g11640	Glyma01g11640	Glyma01g11640	Gm01:14972818-14973806	14-7-0	2014-07-07	OK	60.6123	75.4085	0.315116	-0.516444	0.605544	0.891236	no
Glyma01g11755	Glyma01g11755	Glyma01g11755	Gm01:15083417-15085790	14-7-0	2014-07-07	NOTEST	0	0	0	0	1	1	no
Glyma01g11870	Glyma01g11870	Glyma01g11870	Gm01:15195053-15195880	14-7-0	2014-07-07	OK	78.8619	67.8809	-0.216321	0.357027	0.721072	0.930361	no
Glyma01g12310	Glyma01g12310	Glyma01g12310	Gm01:15500343-15500912	14-7-0	2014-07-07	NOTEST	0	0	0	0	1	1	no
Glyma01g12340	Glyma01g12340	Glyma01g12340	Gm01:15542210-15548262	14-7-0	2014-07-07	OK	10.8981	7.23745	-0.590518	0.96119	0.336457	0.725621	no
Glyma01g12740	Glyma01g12740	Glyma01g12740	Gm01:15937028-15939729	14-7-0	2014-07-07	OK	5.47798	3.77309	-0.537898	0.895328	0.370612	0.752486	no
Glyma01g12840	Glyma01g12840	Glyma01g12840	Gm01:15948220-15953470	14-7-0	2014-07-07	NOTEST	0.590658	0.132728	-2.15385	1.32171	0.186265	1	no
Glyma01g12940	Glyma01g12940	Glyma01g12940	Gm01:16087453-16089518	14-7-0	2014-07-07	OK	1.67494	0.427466	-1.97023	2.10575	0.035226	0.225093	no
Glyma01g12955	Glyma01g12955	Glyma01g12955	Gm01:16103170-16106499	14-7-0	2014-07-07	NOTEST	0	0	0	0	1	1	no
Glyma01g12970	Glyma01g12970	Glyma01g12970	Gm01:16134796-16136261	14-7-0	2014-07-07	OK	7.32808	7.81598	0.0929902	-0.150852	0.880093	0.973458	no
Glyma01g13170	Glyma01g13170	Glyma01g13170	Gm01:16335425-16339127	14-7-0	2014-07-07	OK	46.0387	47.4404	0.0432682	-0.0631875	0.949617	0.989993	no
Glyma01g13390	Glyma01g13390	Glyma01g13390	Gm01:16722784-16724403	14-7-0	2014-07-07	NOTEST	0	0	0	0	1	1	no
Glyma01g13400	Glyma01g13400	Glyma01g13400	Gm01:16727753-16728455	14-7-0	2014-07-07	NOTEST	0	0	0	0	1	1	no
Glyma01g13410	Glyma01g13410	Glyma01g13410	Gm01:16732842-16733939	14-7-0	2014-07-07	NOTEST	0.301123	0	-1.79769e+308	-1.79769e+308	0.0436526	1	no
Glyma01g13532	Glyma01g13532	Glyma01g13532	Gm01:16745457-16750194	14-7-0	2014-07-07	OK	0.555499	0.763084	0.458058	-0.370512	0.711001	0.927795	no
Glyma01g13654	Glyma01g13654	Glyma01g13654	Gm01:16827427-16868761	14-7-0	2014-07-07	OK	3.11623	2.54432	-0.292524	0.412138	0.680239	0.918418	no
Glyma01g13777	Glyma01g13777	Glyma01g13777	Gm01:16940733-16941754	14-7-0	2014-07-07	NOTEST	0	0	0	0	1	1	no
Glyma01g13900	Glyma01g13900	Glyma01g13900	Gm01:17306260-17308391	14-7-0	2014-07-07	NOTEST	0	0	0	0	1	1	no
Glyma01g13930	Glyma01g13930	Glyma01g13930	Gm01:17320003-17321677	14-7-0	2014-07-07	NOTEST	0.289701	0.309392	0.0948717	-0.0846768	0.932518	1	no
Glyma01g13945	Glyma01g13945	Glyma01g13945	Gm01:17420498-17470577	14-7-0	2014-07-07	NOTEST	0.210196	0.195261	-0.106336	0.096664	0.922993	1	no
Glyma01g13960	Glyma01g13960	Glyma01g13960	Gm01:17481711-17482061	14-7-0	2014-07-07	NOTEST	0	0	0	0	1	1	no
Glyma01g14160	Glyma01g14160	Glyma01g14160	Gm01:17627819-17629241	14-7-0	2014-07-07	NOTEST	0	0	0	0	1	1	no
Glyma01g14266	Glyma01g14266	Glyma01g14266	Gm01:17633685-17639586	14-7-0	2014-07-07	NOTEST	0	0	0	0	1	1	no
Glyma01g14373	Glyma01g14373	Glyma01g14373	Gm01:18006948-18034570	14-7-0	2014-07-07	OK	2.08888	5.0467	1.27261	-1.97785	0.0479454	0.268045	no
Glyma01g14480	Glyma01g14480	Glyma01g14480	Gm01:18042133-18046082	14-7-0	2014-07-07	OK	13.0838	22.716	0.795928	-1.3114	0.189722	0.561347	no
Glyma01g14500	Glyma01g14500	Glyma01g14500	Gm01:18130228-18132625	14-7-0	2014-07-07	NOTEST	0	0	0	0	1	1	no
Glyma01g14700	Glyma01g14700	Glyma01g14700	Gm01:18300892-18301399	14-7-0	2014-07-07	OK	1.89177	2.74664	0.537931	-0.53303	0.594013	0.886581	no
Glyma01g14733	Glyma01g14733	Glyma01g14733	Gm01:18318922-18323085	14-7-0	2014-07-07	OK	1.20501	0.847841	-0.507178	0.615991	0.537901	0.857949	no
Glyma01g14766	Glyma01g14766	Glyma01g14766	Gm01:18346082-18347761	14-7-0	2014-07-07	NOTEST	0.49743	0.264575	-0.910814	0.841784	0.399909	1	no
Glyma01g14800	Glyma01g14800	Glyma01g14800	Gm01:18356149-18373966	14-7-0	2014-07-07	OK	3.8935	4.14491	0.0902742	-0.13683	0.891165	0.976721	no
Glyma01g14905	Glyma01g14905	Glyma01g14905	Gm01:18507857-18508875	14-7-0	2014-07-07	NOTEST	0	0	0	0	1	1	no
Glyma01g15010	Glyma01g15010	Glyma01g15010	Gm01:18517441-18518370	14-7-0	2014-07-07	NOTEST	0	0	0	0	1	1	no
Glyma01g15134	Glyma01g15134	Glyma01g15134	Gm01:18526281-18533321	14-7-0	2014-07-07	OK	2.04268	1.12499	-0.860555	1.0834	0.278632	0.671007	no
Glyma01g15258	Glyma01g15258	Glyma01g15258	Gm01:18637238-18640215	14-7-0	2014-07-07	NOTEST	0	0.22872	1.79769e+308	1.79769e+308	0.0416395	1	no
Glyma01g15382	Glyma01g15382	Glyma01g15382	Gm01:18694961-18695204	14-7-0	2014-07-07	NOTEST	0	0	0	0	1	1	no
Glyma01g15506	Glyma01g15506	Glyma01g15506	Gm01:18952413-18962622	14-7-0	2014-07-07	OK	21.4949	20.1724	-0.0916076	0.123539	0.90168	0.978342	no
Glyma01g15630	Glyma01g15630	Glyma01g15630	Gm01:19254139-19255483	14-7-0	2014-07-07	NOTEST	0.364933	0.127942	-1.51214	1.08082	0.279779	1	no
Glyma01g15687	Glyma01g15687	Glyma01g15687	Gm01:19474756-19475786	14-7-0	2014-07-07	NOTEST	0	0	0	0	1	1	no
Glyma01g15744	Glyma01g15744	Glyma01g15744	Gm01:19561924-19565934	14-7-0	2014-07-07	NOTEST	0	0	0	0	1	1	no
Glyma01g15802	Glyma01g15802	Glyma01g15802	Gm01:19569955-19570642	14-7-0	2014-07-07	NOTEST	0	0	0	0	1	1	no
Glyma01g15860	Glyma01g15860	Glyma01g15860	Gm01:19642510-19643505	14-7-0	2014-07-07	NOTEST	0	0	0	0	1	1	no
Glyma01g15883	Glyma01g15883	Glyma01g15883	Gm01:19661251-19662687	14-7-0	2014-07-07	NOTEST	0	0	0	0	1	1	no
Glyma01g15906	Glyma01g15906	Glyma01g15906	Gm01:19730841-19731653	14-7-0	2014-07-07	NOTEST	0	0	0	0	1	1	no
Glyma01g15930	Glyma01g15930	Glyma01g15930	Gm01:19793857-19799930	14-7-0	2014-07-07	OK	32.5739	24.9766	-0.383135	0.615925	0.537944	0.857959	no
Glyma01g16140	Glyma01g16140	Glyma01g16140	Gm01:20041371-20043743	14-7-0	2014-07-07	NOTEST	0	0.444182	1.79769e+308	1.79769e+308	0.0340686	1	no
Glyma01g16250	Glyma01g16250	Glyma01g16250	Gm01:20048200-20050535	14-7-0	2014-07-07	NOTEST	0	0	0	0	1	1	no
Glyma01g16360	Glyma01g16360	Glyma01g16360	Gm01:20233418-20235447	14-7-0	2014-07-07	OK	0.277656	0.833254	1.58546	-1.36432	0.172467	0.539533	no
Glyma01g16370	Glyma01g16370	Glyma01g16370	Gm01:20243646-20255339	14-7-0	2014-07-07	OK	6.07544	3.88481	-0.645147	0.967525	0.333282	0.722279	no
Glyma01g16375	Glyma01g16375	Glyma01g16375	Gm01:20243646-20255339	14-7-0	2014-07-07	OK	5.44435	2.75916	-0.980533	0.384061	0.700933	0.924098	no
Glyma01g16380	Glyma01g16380	Glyma01g16380	Gm01:20340974-20356558	14-7-0	2014-07-07	OK	27.3094	19.3992	-0.4934	0.80077	0.423265	0.790374	no
Glyma01g16526	Glyma01g16526	Glyma01g16526	Gm01:20473820-20507463	14-7-0	2014-07-07	OK	5.85238	3.44118	-0.766122	1.01344	0.310852	0.704058	no
Glyma01g16673	Glyma01g16673	Glyma01g16673	Gm01:20473820-20507463	14-7-0	2014-07-07	NOTEST	0.176385	0.0986618	-0.838162	0.252813	0.800413	1	no
Glyma01g16820	Glyma01g16820	Glyma01g16820	Gm01:20713503-20720624	14-7-0	2014-07-07	OK	2.69249	3.85906	0.519311	-0.797474	0.425176	0.79168	no
Glyma01g17030	Glyma01g17030	Glyma01g17030	Gm01:21011809-21014457	14-7-0	2014-07-07	NOTEST	0.380527	0.351929	-0.112713	0.102067	0.918704	1	no
Glyma01g17230	Glyma01g17230	Glyma01g17230	Gm01:21161585-21162372	14-7-0	2014-07-07	OK	9.04773	10.9658	0.277384	-0.419159	0.6751	0.916738	no
Glyma01g17240	Glyma01g17240	Glyma01g17240	Gm01:21232889-21235373	14-7-0	2014-07-07	OK	1.20864	1.3892	0.200871	-0.220893	0.825176	0.958641	no
Glyma01g17271	Glyma01g17271	Glyma01g17271	Gm01:21300956-21302664	14-7-0	2014-07-07	NOTEST	0	0	0	0	1	1	no
Glyma01g17300	Glyma01g17300	Glyma01g17300	Gm01:21447376-21448520	14-7-0	2014-07-07	OK	51.9388	17.3536	-1.58158	2.62617	0.0086352	0.0965114	no
Glyma01g17330	Glyma01g17330	Glyma01g17330	Gm01:21487778-21490647	14-7-0	2014-07-07	NOTEST	0	0	0	0	1	1	no
Glyma01g17350	Glyma01g17350	Glyma01g17350	Gm01:21601999-21604652	14-7-0	2014-07-07	OK	2.52937	2.21874	-0.189037	0.281595	0.778254	0.946995	no
Glyma01g17426	Glyma01g17426	Glyma01g17426	Gm01:21677182-21677611	14-7-0	2014-07-07	NOTEST	0	0	0	0	1	1	no
Glyma01g17503	Glyma01g17503	Glyma01g17503	Gm01:21677719-21680521	14-7-0	2014-07-07	NOTEST	0	0	0	0	1	1	no
Glyma01g17580	Glyma01g17580	Glyma01g17580	Gm01:21886080-21888825	14-7-0	2014-07-07	NOTEST	0	0	0	0	1	1	no
Glyma01g17590	Glyma01g17590	Glyma01g17590	Gm01:21937384-21937864	14-7-0	2014-07-07	NOTEST	0	0	0	0	1	1	no
Glyma01g17820	Glyma01g17820	Glyma01g17820	Gm01:22078170-22079110	14-7-0	2014-07-07	OK	36.3544	69.1698	0.928012	-1.54988	0.12117	0.452547	no
Glyma01g17850	Glyma01g17850	Glyma01g17850	Gm01:22130113-22137111	14-7-0	2014-07-07	OK	38.9742	28.1973	-0.466961	0.658883	0.509971	0.842319	no
Glyma01g17870	Glyma01g17870	Glyma01g17870	Gm01:22202473-22210341	14-7-0	2014-07-07	OK	20.9593	9.57387	-1.13042	1.58769	0.112357	0.43314	no
Glyma01g17880	Glyma01g17880	Glyma01g17880	Gm01:22222121-22222938	14-7-0	2014-07-07	NOTEST	0	0	0	0	1	1	no
Glyma01g18040	Glyma01g18040	Glyma01g18040	Gm01:22484144-22487576	14-7-0	2014-07-07	OK	7.69544	7.75088	0.0103563	-0.0174722	0.98606	0.996759	no
Glyma01g18200	Glyma01g18200	Glyma01g18200	Gm01:22687069-22688346	14-7-0	2014-07-07	OK	6.20538	0	-1.79769e+308	-1.79769e+308	0.0403354	0.243099	no
Glyma01g18360	Glyma01g18360	Glyma01g18360	Gm01:22689358-22689601	14-7-0	2014-07-07	OK	11.8397	4.53579	-1.38421	1.14845	0.250782	0.639076	no
Glyma01g18520	Glyma01g18520	Glyma01g18520	Gm01:22790155-22793135	14-7-0	2014-07-07	NOTEST	0	0	0	0	1	1	no
Glyma01g18606	Glyma01g18606	Glyma01g18606	Gm01:23174174-23175344	14-7-0	2014-07-07	NOTEST	0	0.0914573	1.79769e+308	1.79769e+308	0.0980491	1	no
Glyma01g18693	Glyma01g18693	Glyma01g18693	Gm01:23245420-23247113	14-7-0	2014-07-07	NOTEST	0	0	0	0	1	1	no
Glyma01g18780	Glyma01g18780	Glyma01g18780	Gm01:23303293-23306986	14-7-0	2014-07-07	OK	19.3972	18.9875	-0.0307991	0.0519085	0.958602	0.99224	no
Glyma01g18885	Glyma01g18885	Glyma01g18885	Gm01:23422050-23424265	14-7-0	2014-07-07	NOTEST	0	0	0	0	1	1	no
Glyma01g18990	Glyma01g18990	Glyma01g18990	Gm01:23424891-23425203	14-7-0	2014-07-07	NOTEST	0	0	0	0	1	1	no
Glyma01g19200	Glyma01g19200	Glyma01g19200	Gm01:23586981-23590259	14-7-0	2014-07-07	OK	4.10701	4.35896	0.085898	-0.112509	0.910419	0.980124	no
Glyma01g19420	Glyma01g19420	Glyma01g19420	Gm01:23910735-23912214	14-7-0	2014-07-07	OK	21.1148	6.07044	-1.79838	2.92333	0.0034631	0.0524254	no
Glyma01g19820	Glyma01g19820	Glyma01g19820	Gm01:24220923-24227067	14-7-0	2014-07-07	OK	0.922677	1.18187	0.357179	-0.418495	0.675585	0.916816	no
Glyma01g20030	Glyma01g20030	Glyma01g20030	Gm01:24388541-24405141	14-7-0	2014-07-07	OK	5.34168	7.67614	0.523086	-0.615567	0.53818	0.858127	no
Glyma01g20130	Glyma01g20130	Glyma01g20130	Gm01:24561667-24562473	14-7-0	2014-07-07	NOTEST	0	0	0	0	1	1	no
Glyma01g20230	Glyma01g20230	Glyma01g20230	Gm01:24590327-24594299	14-7-0	2014-07-07	OK	0.958237	2.43184	1.34359	-1.44553	0.148309	0.501434	no
Glyma01g20306	Glyma01g20306	Glyma01g20306	Gm01:24680832-24681420	14-7-0	2014-07-07	NOTEST	0	0	0	0	1	1	no
Glyma01g20383	Glyma01g20383	Glyma01g20383	Gm01:24850234-24853077	14-7-0	2014-07-07	OK	8.79798	3.65004	-1.26926	2.04278	0.0410745	0.246006	no
Glyma01g20460	Glyma01g20460	Glyma01g20460	Gm01:24945683-24950931	14-7-0	2014-07-07	OK	13.7615	63.7943	2.21279	-3.39833	0.000677979	0.016996	yes
Glyma01g20565	Glyma01g20565	Glyma01g20565	Gm01:25139086-25141476	14-7-0	2014-07-07	NOTEST	0	0	0	0	1	1	no
Glyma01g20670	Glyma01g20670	Glyma01g20670	Gm01:25147643-25157143	14-7-0	2014-07-07	OK	12.578	21.4194	0.768014	-1.2925	0.196184	0.570138	no
Glyma01g20700	Glyma01g20700	Glyma01g20700	Gm01:25222324-25227920	14-7-0	2014-07-07	OK	8.88016	24.3988	1.45816	-2.41286	0.0158278	0.142302	no
Glyma01g20710	Glyma01g20710	Glyma01g20710	Gm01:25241778-25246814	14-7-0	2014-07-07	OK	0	0.829471	1.79769e+308	1.79769e+308	0.010253	0.107948	no
Glyma01g20720	Glyma01g20720	Glyma01g20720	Gm01:25343080-25358309	14-7-0	2014-07-07	OK	0.55395	1.3569	1.29249	-1.48035	0.138779	0.486466	no
Glyma01g20740	Glyma01g20740	Glyma01g20740	Gm01:25402501-25405946	14-7-0	2014-07-07	OK	0.819838	0.621424	-0.399761	0.412548	0.679938	0.918277	no
Glyma01g20751	Glyma01g20751	Glyma01g20751	Gm01:25409531-25409921	14-7-0	2014-07-07	NOTEST	0	0	0	0	1	1	no
Glyma01g20760	Glyma01g20760	Glyma01g20760	Gm01:25500530-25509163	14-7-0	2014-07-07	OK	17.4713	13.7907	-0.341293	0.522748	0.601149	0.890154	no
Glyma01g20775	Glyma01g20775	Glyma01g20775	Gm01:25559739-25563228	14-7-0	2014-07-07	OK	17.3615	11.576	-0.584752	0.973537	0.330287	0.719547	no
Glyma01g20790	Glyma01g20790	Glyma01g20790	Gm01:25566713-25569152	14-7-0	2014-07-07	OK	0.533323	1.74035	1.7063	-1.61879	0.105493	0.418465	no
Glyma01g20800	Glyma01g20800	Glyma01g20800	Gm01:25569808-25571509	14-7-0	2014-07-07	NOTEST	0	0.183172	1.79769e+308	1.79769e+308	0.0980491	1	no
Glyma01g20811	Glyma01g20811	Glyma01g20811	Gm01:25640214-25651295	14-7-0	2014-07-07	OK	11.1066	4.07695	-1.44586	2.36385	0.018086	0.153049	no
Glyma01g20820	Glyma01g20820	Glyma01g20820	Gm01:25640214-25651295	14-7-0	2014-07-07	LOWDATA	0	0	-1.44586	0	1	1	no
Glyma01g20860	Glyma01g20860	Glyma01g20860	Gm01:25711548-25714121	14-7-0	2014-07-07	OK	37.0135	26.209	-0.497992	0.799695	0.423888	0.79075	no
Glyma01g20870	Glyma01g20870	Glyma01g20870	Gm01:25714752-25716813	14-7-0	2014-07-07	NOTEST	0.129727	0.416431	1.6826	-1.35295	0.17607	1	no
Glyma01g20885	Glyma01g20885	Glyma01g20885	Gm01:25783765-25787946	14-7-0	2014-07-07	NOTEST	0	0	0	0	1	1	no
Glyma01g20900	Glyma01g20900	Glyma01g20900	Gm01:25807514-25813526	14-7-0	2014-07-07	NOTEST	0	0	0	0	1	1	no
Glyma01g20910	Glyma01g20910	Glyma01g20910	Gm01:25867401-25867807	14-7-0	2014-07-07	NOTEST	0	0	0	0	1	1	no
Glyma01g20920	Glyma01g20920	Glyma01g20920	Gm01:25867821-25870459	14-7-0	2014-07-07	OK	4.08791	1.51607	-1.43103	1.50724	0.13175	0.472822	no
Glyma01g20935	Glyma01g20935	Glyma01g20935	Gm01:25874290-25875066	14-7-0	2014-07-07	NOTEST	0	0.184074	1.79769e+308	1.79769e+308	0.180329	1	no
Glyma01g20950	Glyma01g20950	Glyma01g20950	Gm01:26043470-26048530	14-7-0	2014-07-07	OK	1.72451	0.951836	-0.857399	1.08631	0.277341	0.669002	no
Glyma01g20970	Glyma01g20970	Glyma01g20970	Gm01:26111521-26112660	14-7-0	2014-07-07	NOTEST	0	0	0	0	1	1	no
Glyma01g20980	Glyma01g20980	Glyma01g20980	Gm01:26203747-26206343	14-7-0	2014-07-07	NOTEST	0	0	0	0	1	1	no
Glyma01g20986	Glyma01g20986	Glyma01g20986	Gm01:26214735-26217244	14-7-0	2014-07-07	NOTEST	0	0	0	0	1	1	no
Glyma01g20993	Glyma01g20993	Glyma01g20993	Gm01:26218166-26218983	14-7-0	2014-07-07	NOTEST	0	0	0	0	1	1	no
Glyma01g21000	Glyma01g21000	Glyma01g21000	Gm01:26227617-26228265	14-7-0	2014-07-07	NOTEST	0	0	0	0	1	1	no
Glyma01g21120	Glyma01g21120	Glyma01g21120	Gm01:26230555-26237293	14-7-0	2014-07-07	NOTEST	0	0	0	0	1	1	no
Glyma01g21241	Glyma01g21241	Glyma01g21241	Gm01:26358875-26362351	14-7-0	2014-07-07	NOTEST	0	0	0	0	1	1	no
Glyma01g21360	Glyma01g21360	Glyma01g21360	Gm01:26380864-26392487	14-7-0	2014-07-07	OK	2.93266	2.96561	0.0161205	-0.020613	0.983554	0.995966	no
Glyma01g21480	Glyma01g21480	Glyma01g21480	Gm01:26542098-26544485	14-7-0	2014-07-07	OK	1.04733	4.11997	1.97592	-2.68686	0.00721262	0.0853131	no
Glyma01g21500	Glyma01g21500	Glyma01g21500	Gm01:26596018-26599902	14-7-0	2014-07-07	OK	50.1526	21.9528	-1.19192	1.97985	0.0477208	0.267717	no
Glyma01g21510	Glyma01g21510	Glyma01g21510	Gm01:26672645-26677024	14-7-0	2014-07-07	OK	1.67166	0.978254	-0.773005	0.795107	0.426551	0.792652	no
Glyma01g21521	Glyma01g21521	Glyma01g21521	Gm01:26725662-26726466	14-7-0	2014-07-07	NOTEST	0	0	0	0	1	1	no
Glyma01g21530	Glyma01g21530	Glyma01g21530	Gm01:26737266-26739888	14-7-0	2014-07-07	NOTEST	0	0.0783101	1.79769e+308	1.79769e+308	0.20169	1	no
Glyma01g21540	Glyma01g21540	Glyma01g21540	Gm01:26740703-26749646	14-7-0	2014-07-07	NOTEST	0.321508	0.141657	-1.18245	0.640146	0.522078	1	no
Glyma01g21570	Glyma01g21570	Glyma01g21570	Gm01:26771286-26773122	14-7-0	2014-07-07	NOTEST	0	0	0	0	1	1	no
Glyma01g21575	Glyma01g21575	Glyma01g21575	Gm01:26798193-26799005	14-7-0	2014-07-07	NOTEST	0	0.190041	1.79769e+308	1.79769e+308	0.180329	1	no
Glyma01g21580	Glyma01g21580	Glyma01g21580	Gm01:26814403-26817180	14-7-0	2014-07-07	NOTEST	0.111815	0	-1.79769e+308	-1.79769e+308	0.066394	1	no
Glyma01g21590	Glyma01g21590	Glyma01g21590	Gm01:26883578-26885952	14-7-0	2014-07-07	NOTEST	0	0	0	0	1	1	no
Glyma01g21620	Glyma01g21620	Glyma01g21620	Gm01:26918441-26921225	14-7-0	2014-07-07	NOTEST	0.493081	0.23578	-1.06438	0.968272	0.332908	1	no
Glyma01g21630	Glyma01g21630	Glyma01g21630	Gm01:26936772-26938129	14-7-0	2014-07-07	NOTEST	0	0	0	0	1	1	no
Glyma01g21660	Glyma01g21660	Glyma01g21660	Gm01:27033743-27042354	14-7-0	2014-07-07	OK	1.23365	2.12154	0.782173	-0.976151	0.32899	0.718782	no
Glyma01g21680	Glyma01g21680	Glyma01g21680	Gm01:27082459-27084583	14-7-0	2014-07-07	OK	5.35483	3.41597	-0.648548	0.936692	0.348917	0.736737	no
Glyma01g21707	Glyma01g21707	Glyma01g21707	Gm01:27099239-27134127	14-7-0	2014-07-07	OK	1.56873	2.46562	0.652355	-0.785376	0.432233	0.796412	no
Glyma01g21734	Glyma01g21734	Glyma01g21734	Gm01:27099239-27134127	14-7-0	2014-07-07	OK	0.725683	0.354652	-1.03293	0.729475	0.465711	0.81632	no
Glyma01g21762	Glyma01g21762	Glyma01g21762	Gm01:27142763-27149757	14-7-0	2014-07-07	NOTEST	0	0	0	0	1	1	no
Glyma01g21790	Glyma01g21790	Glyma01g21790	Gm01:27193609-27195324	14-7-0	2014-07-07	NOTEST	0	0	0	0	1	1	no
Glyma01g21831	Glyma01g21831	Glyma01g21831	Gm01:27209475-27244035	14-7-0	2014-07-07	NOTEST	0.331132	0.455252	0.459261	-0.399077	0.689837	1	no
Glyma01g21870	Glyma01g21870	Glyma01g21870	Gm01:27283470-27283944	14-7-0	2014-07-07	NOTEST	0	0	0	0	1	1	no
Glyma01g21900	Glyma01g21900	Glyma01g21900	Gm01:27377288-27379936	14-7-0	2014-07-07	OK	2.59254	0.854202	-1.60172	1.93708	0.052736	0.284149	no
Glyma01g22120	Glyma01g22120	Glyma01g22120	Gm01:27653934-27655968	14-7-0	2014-07-07	NOTEST	0	0	0	0	1	1	no
Glyma01g22131	Glyma01g22131	Glyma01g22131	Gm01:27671430-27681519	14-7-0	2014-07-07	NOTEST	0	0	0	0	1	1	no
Glyma01g22140	Glyma01g22140	Glyma01g22140	Gm01:27681952-27683220	14-7-0	2014-07-07	NOTEST	0	0	0	0	1	1	no
Glyma01g22160	Glyma01g22160	Glyma01g22160	Gm01:27743827-27745117	14-7-0	2014-07-07	OK	2.31142	1.67847	-0.461631	0.530709	0.59562	0.887144	no
Glyma01g22170	Glyma01g22170	Glyma01g22170	Gm01:27746481-27751766	14-7-0	2014-07-07	OK	8.58278	13.7566	0.680608	-1.13872	0.254819	0.64353	no
Glyma01g22180	Glyma01g22180	Glyma01g22180	Gm01:27781683-27784987	14-7-0	2014-07-07	OK	1.6839	8.0965	2.26549	-2.77714	0.00548401	0.0713073	no
Glyma01g22195	Glyma01g22195	Glyma01g22195	Gm01:27825362-27840530	14-7-0	2014-07-07	NOTEST	0	0.0336039	1.79769e+308	1.79769e+308	0.338047	1	no
Glyma01g22210	Glyma01g22210	Glyma01g22210	Gm01:27825362-27840530	14-7-0	2014-07-07	OK	1.54682	1.70385	0.139487	-0.142339	0.886813	0.97558	no
Glyma01g22260	Glyma01g22260	Glyma01g22260	Gm01:27963645-27965402	14-7-0	2014-07-07	OK	2.08947	8.7443	2.0652	-3.06688	0.00216308	0.038243	yes
Glyma01g22333	Glyma01g22333	Glyma01g22333	Gm01:28079064-28083033	14-7-0	2014-07-07	NOTEST	0.279851	0.228939	-0.289697	0.196816	0.843972	1	no
Glyma01g22406	Glyma01g22406	Glyma01g22406	Gm01:28104831-28117466	14-7-0	2014-07-07	OK	4.55061	8.29935	0.866938	-1.4492	0.147283	0.499232	no
Glyma01g22480	Glyma01g22480	Glyma01g22480	Gm01:28151173-28153211	14-7-0	2014-07-07	OK	4.49863	5.77566	0.3605	-0.576155	0.564511	0.872087	no
Glyma01g22490	Glyma01g22490	Glyma01g22490	Gm01:28188535-28194784	14-7-0	2014-07-07	OK	14.5244	9.1027	-0.674115	1.13104	0.258039	0.6474	no
Glyma01g22501	Glyma01g22501	Glyma01g22501	Gm01:28205872-28206502	14-7-0	2014-07-07	NOTEST	0	0	0	0	1	1	no
Glyma01g22510	Glyma01g22510	Glyma01g22510	Gm01:28236453-28241841	14-7-0	2014-07-07	OK	0.500772	1.44046	1.52431	-1.68096	0.0927701	0.392336	no
Glyma01g22530	Glyma01g22530	Glyma01g22530	Gm01:28336960-28340913	14-7-0	2014-07-07	NOTEST	0	0.386815	1.79769e+308	1.79769e+308	0.0254754	1	no
Glyma01g22542	Glyma01g22542	Glyma01g22542	Gm01:28390587-28392968	14-7-0	2014-07-07	OK	1.53384	1.42612	-0.10505	0.102184	0.918611	0.981587	no
Glyma01g22554	Glyma01g22554	Glyma01g22554	Gm01:28393068-28396339	14-7-0	2014-07-07	OK	0.63909	0.946609	0.56675	-0.600875	0.547923	0.862642	no
Glyma01g22567	Glyma01g22567	Glyma01g22567	Gm01:28416197-28418758	14-7-0	2014-07-07	NOTEST	0	0	0	0	1	1	no
Glyma01g22580	Glyma01g22580	Glyma01g22580	Gm01:28513351-28526497	14-7-0	2014-07-07	OK	1.41313	1.29138	-0.129987	0.144469	0.88513	0.975316	no
Glyma01g22600	Glyma01g22600	Glyma01g22600	Gm01:28536103-28539838	14-7-0	2014-07-07	OK	15.5767	13.5783	-0.19808	0.308415	0.757767	0.940566	no
Glyma01g22610	Glyma01g22610	Glyma01g22610	Gm01:28541141-28542499	14-7-0	2014-07-07	NOTEST	0.553107	0.0701951	-2.97812	1.68982	0.0910628	1	no
Glyma01g22620	Glyma01g22620	Glyma01g22620	Gm01:28543689-28553173	14-7-0	2014-07-07	OK	96.8554	44.7248	-1.11476	1.51065	0.130878	0.471349	no
Glyma01g22630	Glyma01g22630	Glyma01g22630	Gm01:28591482-28597660	14-7-0	2014-07-07	OK	3.06019	3.47955	0.185276	-0.280729	0.778918	0.947365	no
Glyma01g22641	Glyma01g22641	Glyma01g22641	Gm01:28636476-28637827	14-7-0	2014-07-07	OK	0.671763	1.89358	1.49509	-1.5654	0.11749	0.445368	no
Glyma01g22650	Glyma01g22650	Glyma01g22650	Gm01:28639438-28642822	14-7-0	2014-07-07	NOTEST	0	0	0	0	1	1	no
Glyma01g22670	Glyma01g22670	Glyma01g22670	Gm01:28699702-28704423	14-7-0	2014-07-07	NOTEST	0.116085	0	-1.79769e+308	-1.79769e+308	0.066394	1	no
Glyma01g22680	Glyma01g22680	Glyma01g22680	Gm01:28708173-28714632	14-7-0	2014-07-07	OK	13.7399	16.7863	0.288914	-0.454759	0.649283	0.908313	no
Glyma01g22710	Glyma01g22710	Glyma01g22710	Gm01:28768432-28773021	14-7-0	2014-07-07	OK	3.61452	1.17418	-1.62216	2.45373	0.0141383	0.13281	no
Glyma01g22720	Glyma01g22720	Glyma01g22720	Gm01:28773705-28774862	14-7-0	2014-07-07	OK	0.651791	0	-1.79769e+308	-1.79769e+308	0.0375074	0.232123	no
Glyma01g22730	Glyma01g22730	Glyma01g22730	Gm01:28777549-28780388	14-7-0	2014-07-07	NOTEST	0	0	0	0	1	1	no
Glyma01g22751	Glyma01g22751	Glyma01g22751	Gm01:28847126-28848359	14-7-0	2014-07-07	NOTEST	0	0	0	0	1	1	no
Glyma01g22770	Glyma01g22770	Glyma01g22770	Gm01:28902721-28902950	14-7-0	2014-07-07	NOTEST	0	0	0	0	1	1	no
Glyma01g22800	Glyma01g22800	Glyma01g22800	Gm01:28928281-28929701	14-7-0	2014-07-07	NOTEST	0	0.0694211	1.79769e+308	1.79769e+308	0.0980491	1	no
Glyma01g22830	Glyma01g22830	Glyma01g22830	Gm01:28986402-28988037	14-7-0	2014-07-07	OK	0.110503	0.627374	2.50524	-1.61447	0.106426	0.420769	no
Glyma01g22840	Glyma01g22840	Glyma01g22840	Gm01:28991061-29005174	14-7-0	2014-07-07	NOTEST	0	0.0333528	1.79769e+308	1.79769e+308	0.156988	1	no
Glyma01g22850	Glyma01g22850	Glyma01g22850	Gm01:29076299-29082231	14-7-0	2014-07-07	NOTEST	0	0	0	0	1	1	no
Glyma01g22861	Glyma01g22861	Glyma01g22861	Gm01:29092183-29093676	14-7-0	2014-07-07	NOTEST	0	0	0	0	1	1	no
Glyma01g22871	Glyma01g22871	Glyma01g22871	Gm01:29147726-29148607	14-7-0	2014-07-07	OK	2.16884	3.90832	0.849625	-0.879016	0.379393	0.759554	no
Glyma01g22880	Glyma01g22880	Glyma01g22880	Gm01:29149880-29152191	14-7-0	2014-07-07	NOTEST	0.0486061	0.383664	2.98064	-1.94793	0.0514234	1	no
Glyma01g22910	Glyma01g22910	Glyma01g22910	Gm01:29193663-29195557	14-7-0	2014-07-07	NOTEST	0	0	0	0	1	1	no
Glyma01g22927	Glyma01g22927	Glyma01g22927	Gm01:29230774-29239997	14-7-0	2014-07-07	NOTEST	0	0	0	0	1	1	no
Glyma01g22944	Glyma01g22944	Glyma01g22944	Gm01:29270621-29273823	14-7-0	2014-07-07	NOTEST	0	0	0	0	1	1	no
Glyma01g22962	Glyma01g22962	Glyma01g22962	Gm01:29296975-29300243	14-7-0	2014-07-07	NOTEST	0	0	0	0	1	1	no
Glyma01g22980	Glyma01g22980	Glyma01g22980	Gm01:29388012-29389406	14-7-0	2014-07-07	NOTEST	0	0	0	0	1	1	no
Glyma01g22990	Glyma01g22990	Glyma01g22990	Gm01:29393119-29399932	14-7-0	2014-07-07	NOTEST	0.02344	0.182567	2.96138	-1.92755	0.0539113	1	no
Glyma01g23015	Glyma01g23015	Glyma01g23015	Gm01:29421939-29425642	14-7-0	2014-07-07	OK	1.29515	2.98986	1.20696	-0.918566	0.358323	0.744619	no
Glyma01g23040	Glyma01g23040	Glyma01g23040	Gm01:29470009-29471440	14-7-0	2014-07-07	OK	4.49335	4.86392	0.114328	-0.165578	0.868489	0.969764	no
Glyma01g23056	Glyma01g23056	Glyma01g23056	Gm01:29471833-29483149	14-7-0	2014-07-07	OK	3.39517	3.71416	0.129554	-0.209782	0.833838	0.960588	no
Glyma01g23072	Glyma01g23072	Glyma01g23072	Gm01:29511789-29512084	14-7-0	2014-07-07	NOTEST	0	0	0	0	1	1	no
Glyma01g23089	Glyma01g23089	Glyma01g23089	Gm01:29533330-29533964	14-7-0	2014-07-07	NOTEST	0	0	0	0	1	1	no
Glyma01g23106	Glyma01g23106	Glyma01g23106	Gm01:29535512-29536834	14-7-0	2014-07-07	NOTEST	0	0.181003	1.79769e+308	1.79769e+308	0.180329	1	no
Glyma01g23123	Glyma01g23123	Glyma01g23123	Gm01:29537254-29537802	14-7-0	2014-07-07	NOTEST	0	0	0	0	1	1	no
Glyma01g23140	Glyma01g23140	Glyma01g23140	Gm01:29565892-29574413	14-7-0	2014-07-07	NOTEST	0.168652	0.230142	0.448476	-0.455522	0.648734	1	no
Glyma01g23150	Glyma01g23150	Glyma01g23150	Gm01:29660957-29665158	14-7-0	2014-07-07	OK	5.54413	3.21145	-0.787739	1.25679	0.208829	0.587248	no
Glyma01g23180	Glyma01g23180	Glyma01g23180	Gm01:29699064-29704324	14-7-0	2014-07-07	OK	2.49944	2.35646	-0.0849813	0.129531	0.896937	0.977819	no
Glyma01g23196	Glyma01g23196	Glyma01g23196	Gm01:29809758-29827788	14-7-0	2014-07-07	OK	12.5911	4.44397	-1.50248	1.8029	0.0714034	0.337468	no
Glyma01g23213	Glyma01g23213	Glyma01g23213	Gm01:29809758-29827788	14-7-0	2014-07-07	OK	1.9349	3.31152	0.775236	-0.798523	0.424567	0.791425	no
Glyma01g23230	Glyma01g23230	Glyma01g23230	Gm01:29843906-29847664	14-7-0	2014-07-07	OK	0.730796	6.85822	3.23029	-4.16843	3.06703e-05	0.0017004	yes
Glyma01g23250	Glyma01g23250	Glyma01g23250	Gm01:29855703-29857266	14-7-0	2014-07-07	NOTEST	0	0	0	0	1	1	no
Glyma01g23300	Glyma01g23300	Glyma01g23300	Gm01:29947728-29948872	14-7-0	2014-07-07	NOTEST	0	0	0	0	1	1	no
Glyma01g23342	Glyma01g23342	Glyma01g23342	Gm01:29989093-29991297	14-7-0	2014-07-07	NOTEST	0	0	0	0	1	1	no
Glyma01g23384	Glyma01g23384	Glyma01g23384	Gm01:30079377-30079787	14-7-0	2014-07-07	NOTEST	0.524336	0	-1.79769e+308	-1.79769e+308	0.139932	1	no
Glyma01g23427	Glyma01g23427	Glyma01g23427	Gm01:30083471-30150322	14-7-0	2014-07-07	OK	1.83542	2.21944	0.27408	-0.417234	0.676507	0.917006	no
Glyma01g23470	Glyma01g23470	Glyma01g23470	Gm01:30208373-30208835	14-7-0	2014-07-07	NOTEST	0	0	0	0	1	1	no
Glyma01g23534	Glyma01g23534	Glyma01g23534	Gm01:30275109-30281645	14-7-0	2014-07-07	NOTEST	0	0	0	0	1	1	no
Glyma01g23598	Glyma01g23598	Glyma01g23598	Gm01:30314496-30324821	14-7-0	2014-07-07	OK	7.42024	5.49845	-0.432441	0.715033	0.474589	0.821501	no
Glyma01g23662	Glyma01g23662	Glyma01g23662	Gm01:30575165-30577235	14-7-0	2014-07-07	NOTEST	0	0	0	0	1	1	no
Glyma01g23726	Glyma01g23726	Glyma01g23726	Gm01:30704826-30710568	14-7-0	2014-07-07	OK	6.72289	5.9199	-0.18351	0.300514	0.763785	0.942595	no
Glyma01g23790	Glyma01g23790	Glyma01g23790	Gm01:30725259-30734274	14-7-0	2014-07-07	NOTEST	0	0	0	0	1	1	no
Glyma01g23820	Glyma01g23820	Glyma01g23820	Gm01:30803138-30810796	14-7-0	2014-07-07	OK	1.43359	3.4619	1.27193	-1.43126	0.152354	0.508107	no
Glyma01g23830	Glyma01g23830	Glyma01g23830	Gm01:30834278-30837915	14-7-0	2014-07-07	OK	4.16892	4.16281	-0.00211416	0.00316299	0.997476	0.999645	no
Glyma01g23840	Glyma01g23840	Glyma01g23840	Gm01:30921784-30923363	14-7-0	2014-07-07	NOTEST	0	0	0	0	1	1	no
Glyma01g23870	Glyma01g23870	Glyma01g23870	Gm01:31003666-31006666	14-7-0	2014-07-07	OK	9.2957	6.13108	-0.600422	1.01369	0.310729	0.703956	no
Glyma01g24100	Glyma01g24100	Glyma01g24100	Gm01:31272679-31276347	14-7-0	2014-07-07	OK	49.4744	42.7344	-0.211284	0.350845	0.725704	0.93156	no
Glyma01g24115	Glyma01g24115	Glyma01g24115	Gm01:31363012-31365202	14-7-0	2014-07-07	NOTEST	0	0	0	0	1	1	no
Glyma01g24130	Glyma01g24130	Glyma01g24130	Gm01:31382751-31384508	14-7-0	2014-07-07	NOTEST	0	0	0	0	1	1	no
Glyma01g24136	Glyma01g24136	Glyma01g24136	Gm01:31384592-31388267	14-7-0	2014-07-07	NOTEST	0	0	0	0	1	1	no
Glyma01g24143	Glyma01g24143	Glyma01g24143	Gm01:31403714-31405886	14-7-0	2014-07-07	NOTEST	0	0	0	0	1	1	no
Glyma01g24150	Glyma01g24150	Glyma01g24150	Gm01:31406290-31410211	14-7-0	2014-07-07	OK	0.180157	1.54519	3.10046	-2.63378	0.00844403	0.0951144	no
Glyma01g24160	Glyma01g24160	Glyma01g24160	Gm01:31442860-31443621	14-7-0	2014-07-07	NOTEST	0	0.235329	1.79769e+308	1.79769e+308	0.0980491	1	no
Glyma01g24360	Glyma01g24360	Glyma01g24360	Gm01:31583729-31587255	14-7-0	2014-07-07	OK	36.3625	5.79128	-2.6505	4.22151	2.4267e-05	0.00143771	yes
Glyma01g24383	Glyma01g24383	Glyma01g24383	Gm01:31655035-31655556	14-7-0	2014-07-07	NOTEST	0	0	0	0	1	1	no
Glyma01g24406	Glyma01g24406	Glyma01g24406	Gm01:31704492-31706592	14-7-0	2014-07-07	NOTEST	0	0	0	0	1	1	no
Glyma01g24430	Glyma01g24430	Glyma01g24430	Gm01:31720084-31726752	14-7-0	2014-07-07	OK	2.60612	2.49126	-0.0650267	0.0860403	0.931434	0.985294	no
Glyma01g24455	Glyma01g24455	Glyma01g24455	Gm01:31734753-31736467	14-7-0	2014-07-07	NOTEST	0.145028	0	-1.79769e+308	-1.79769e+308	0.066394	1	no
Glyma01g24480	Glyma01g24480	Glyma01g24480	Gm01:31792540-31792932	14-7-0	2014-07-07	OK	7.68294	5.08592	-0.595149	0.645661	0.518499	0.847008	no
Glyma01g24495	Glyma01g24495	Glyma01g24495	Gm01:31795450-31795885	14-7-0	2014-07-07	OK	1.3406	0	-1.79769e+308	-1.79769e+308	0.052437	0.283289	no
Glyma01g24510	Glyma01g24510	Glyma01g24510	Gm01:31818673-31828608	14-7-0	2014-07-07	OK	1.53648	1.99616	0.377594	-0.540062	0.589154	0.884222	no
Glyma01g24515	Glyma01g24515	Glyma01g24515	Gm01:31889614-31891603	14-7-0	2014-07-07	NOTEST	0	0	0	0	1	1	no
Glyma01g24520	Glyma01g24520	Glyma01g24520	Gm01:31911765-31920749	14-7-0	2014-07-07	OK	5.58893	3.661	-0.610335	0.807347	0.419466	0.787632	no
Glyma01g24530	Glyma01g24530	Glyma01g24530	Gm01:31964428-31977723	14-7-0	2014-07-07	NOTEST	0.200496	0.0706094	-1.50564	1.07678	0.28158	1	no
Glyma01g24536	Glyma01g24536	Glyma01g24536	Gm01:31981604-31985794	14-7-0	2014-07-07	NOTEST	0	0	0	0	1	1	no
Glyma01g24543	Glyma01g24543	Glyma01g24543	Gm01:32028704-32031074	14-7-0	2014-07-07	NOTEST	0	0	0	0	1	1	no
Glyma01g24550	Glyma01g24550	Glyma01g24550	Gm01:32033425-32036205	14-7-0	2014-07-07	OK	2.68692	5.04576	0.909117	-1.01067	0.312174	0.704804	no
Glyma01g24570	Glyma01g24570	Glyma01g24570	Gm01:32066869-32072424	14-7-0	2014-07-07	OK	5.83618	6.29239	0.108584	-0.159065	0.873618	0.971746	no
Glyma01g24580	Glyma01g24580	Glyma01g24580	Gm01:32077414-32078744	14-7-0	2014-07-07	NOTEST	0	0	0	0	1	1	no
Glyma01g24601	Glyma01g24601	Glyma01g24601	Gm01:32084232-32086938	14-7-0	2014-07-07	OK	9.84037	4.50344	-1.12768	1.2041	0.22855	0.611975	no
Glyma01g24620	Glyma01g24620	Glyma01g24620	Gm01:32161499-32162094	14-7-0	2014-07-07	NOTEST	0	0	0	0	1	1	no
Glyma01g24650	Glyma01g24650	Glyma01g24650	Gm01:32202535-32211787	14-7-0	2014-07-07	OK	5.21068	8.36422	0.682758	-1.09168	0.274975	0.666342	no
Glyma01g24670	Glyma01g24670	Glyma01g24670	Gm01:32220914-32223882	14-7-0	2014-07-07	NOTEST	0.181397	0.248993	0.456953	-0.433723	0.66449	1	no
Glyma01g24680	Glyma01g24680	Glyma01g24680	Gm01:32231085-32231557	14-7-0	2014-07-07	NOTEST	0	0	0	0	1	1	no
Glyma01g24710	Glyma01g24710	Glyma01g24710	Gm01:32287633-32289710	14-7-0	2014-07-07	NOTEST	0.0319524	0	-1.79769e+308	-1.79769e+308	0.139932	1	no
Glyma01g24715	Glyma01g24715	Glyma01g24715	Gm01:32301822-32302361	14-7-0	2014-07-07	NOTEST	0	0	0	0	1	1	no
Glyma01g24720	Glyma01g24720	Glyma01g24720	Gm01:32308210-32311363	14-7-0	2014-07-07	NOTEST	0	0	0	0	1	1	no
Glyma01g24735	Glyma01g24735	Glyma01g24735	Gm01:32401120-32402034	14-7-0	2014-07-07	NOTEST	0	0	0	0	1	1	no
Glyma01g24750	Glyma01g24750	Glyma01g24750	Gm01:32402350-32403396	14-7-0	2014-07-07	NOTEST	0	0	0	0	1	1	no
Glyma01g24771	Glyma01g24771	Glyma01g24771	Gm01:32417415-32418160	14-7-0	2014-07-07	NOTEST	0	0	0	0	1	1	no
Glyma01g24790	Glyma01g24790	Glyma01g24790	Gm01:32422309-32422465	14-7-0	2014-07-07	NOTEST	0	0	0	0	1	1	no
Glyma01g24801	Glyma01g24801	Glyma01g24801	Gm01:32490914-32491358	14-7-0	2014-07-07	NOTEST	0	0	0	0	1	1	no
Glyma01g24811	Glyma01g24811	Glyma01g24811	Gm01:32561178-32561613	14-7-0	2014-07-07	NOTEST	0	0	0	0	1	1	no
Glyma01g24820	Glyma01g24820	Glyma01g24820	Gm01:32606517-32608233	14-7-0	2014-07-07	NOTEST	0	0	0	0	1	1	no
Glyma01g24835	Glyma01g24835	Glyma01g24835	Gm01:32612017-32613710	14-7-0	2014-07-07	NOTEST	0	0	0	0	1	1	no
Glyma01g24850	Glyma01g24850	Glyma01g24850	Gm01:32687318-32692418	14-7-0	2014-07-07	NOTEST	0	0	0	0	1	1	no
Glyma01g24870	Glyma01g24870	Glyma01g24870	Gm01:32782513-32787123	14-7-0	2014-07-07	NOTEST	0	0.121772	1.79769e+308	1.79769e+308	0.0539625	1	no
Glyma01g24880	Glyma01g24880	Glyma01g24880	Gm01:32798562-32800071	14-7-0	2014-07-07	OK	4.59429	2.12896	-1.1097	1.44131	0.149498	0.50354	no
Glyma01g24900	Glyma01g24900	Glyma01g24900	Gm01:32814004-32817943	14-7-0	2014-07-07	OK	5.27643	5.74054	0.121624	-0.178166	0.858593	0.967609	no
Glyma01g24915	Glyma01g24915	Glyma01g24915	Gm01:32834808-32836555	14-7-0	2014-07-07	NOTEST	0	0	0	0	1	1	no
Glyma01g24931	Glyma01g24931	Glyma01g24931	Gm01:32867175-32870537	14-7-0	2014-07-07	OK	32.4158	22.1177	-0.551496	0.916192	0.359566	0.745283	no
Glyma01g24945	Glyma01g24945	Glyma01g24945	Gm01:32870727-32871773	14-7-0	2014-07-07	OK	22.9739	6.05155	-1.92462	2.85587	0.00429186	0.0601941	no
Glyma01g24960	Glyma01g24960	Glyma01g24960	Gm01:32900893-32902163	14-7-0	2014-07-07	NOTEST	0	0	0	0	1	1	no
Glyma01g24975	Glyma01g24975	Glyma01g24975	Gm01:33011689-33012355	14-7-0	2014-07-07	NOTEST	0	0	0	0	1	1	no
Glyma01g24990	Glyma01g24990	Glyma01g24990	Gm01:33023697-33026836	14-7-0	2014-07-07	NOTEST	0	0	0	0	1	1	no
Glyma01g25000	Glyma01g25000	Glyma01g25000	Gm01:33038313-33043683	14-7-0	2014-07-07	NOTEST	0	0.0546955	1.79769e+308	1.79769e+308	0.263146	1	no
Glyma01g25010	Glyma01g25010	Glyma01g25010	Gm01:33122056-33128090	14-7-0	2014-07-07	OK	1.23295	1.29041	0.0657129	-0.0753278	0.939954	0.987939	no
Glyma01g25040	Glyma01g25040	Glyma01g25040	Gm01:33159095-33163007	14-7-0	2014-07-07	OK	4.03468	4.37398	0.116493	-0.180158	0.857028	0.967348	no
Glyma01g25116	Glyma01g25116	Glyma01g25116	Gm01:33175920-33176216	14-7-0	2014-07-07	NOTEST	0	0	0	0	1	1	no
Glyma01g25193	Glyma01g25193	Glyma01g25193	Gm01:33176938-33177664	14-7-0	2014-07-07	NOTEST	0	0	0	0	1	1	no
Glyma01g25270	Glyma01g25270	Glyma01g25270	Gm01:33300641-33305517	14-7-0	2014-07-07	OK	7.15523	5.33377	-0.423842	0.653829	0.513222	0.8441	no
Glyma01g25690	Glyma01g25690	Glyma01g25690	Gm01:33714521-33724227	14-7-0	2014-07-07	OK	5.37251	7.66306	0.512325	-0.850013	0.395318	0.771437	no
Glyma01g25710	Glyma01g25710	Glyma01g25710	Gm01:33743092-33750073	14-7-0	2014-07-07	OK	0.531843	1.27744	1.26418	-1.50866	0.131386	0.472291	no
Glyma01g25734	Glyma01g25734	Glyma01g25734	Gm01:33873561-33877219	14-7-0	2014-07-07	NOTEST	0	0	0	0	1	1	no
Glyma01g25758	Glyma01g25758	Glyma01g25758	Gm01:33877681-33878910	14-7-0	2014-07-07	NOTEST	0	0	0	0	1	1	no
Glyma01g25782	Glyma01g25782	Glyma01g25782	Gm01:33892028-33896774	14-7-0	2014-07-07	NOTEST	0.0237613	0	-1.79769e+308	-1.79769e+308	0.247841	1	no
Glyma01g25806	Glyma01g25806	Glyma01g25806	Gm01:33911123-33912252	14-7-0	2014-07-07	NOTEST	0	0	0	0	1	1	no
Glyma01g25830	Glyma01g25830	Glyma01g25830	Gm01:33967102-33969353	14-7-0	2014-07-07	OK	17.0944	27.8729	0.705342	-1.15635	0.24754	0.634537	no
Glyma01g25861	Glyma01g25861	Glyma01g25861	Gm01:33970039-33970770	14-7-0	2014-07-07	NOTEST	0	0.234814	1.79769e+308	1.79769e+308	0.180329	1	no
Glyma01g25890	Glyma01g25890	Glyma01g25890	Gm01:34032831-34039400	14-7-0	2014-07-07	OK	8.21003	8.40966	0.0346593	-0.0581133	0.953658	0.990816	no
Glyma01g25903	Glyma01g25903	Glyma01g25903	Gm01:34110636-34112307	14-7-0	2014-07-07	NOTEST	0	0	0	0	1	1	no
Glyma01g25916	Glyma01g25916	Glyma01g25916	Gm01:34210140-34210872	14-7-0	2014-07-07	NOTEST	0	0	0	0	1	1	no
Glyma01g25930	Glyma01g25930	Glyma01g25930	Gm01:34244964-34245805	14-7-0	2014-07-07	NOTEST	0.312805	0	-1.79769e+308	-1.79769e+308	0.066394	1	no
Glyma01g25940	Glyma01g25940	Glyma01g25940	Gm01:34287073-34295334	14-7-0	2014-07-07	OK	33.3337	22.9465	-0.53871	0.809315	0.418334	0.786758	no
Glyma01g25960	Glyma01g25960	Glyma01g25960	Gm01:34329634-34332496	14-7-0	2014-07-07	NOTEST	0	0.330699	1.79769e+308	1.79769e+308	0.0739066	1	no
Glyma01g25980	Glyma01g25980	Glyma01g25980	Gm01:34344570-34345856	14-7-0	2014-07-07	NOTEST	0	0	0	0	1	1	no
Glyma01g26010	Glyma01g26010	Glyma01g26010	Gm01:34353206-34357427	14-7-0	2014-07-07	NOTEST	0	0	0	0	1	1	no
Glyma01g26220	Glyma01g26220	Glyma01g26220	Gm01:34484074-34486309	14-7-0	2014-07-07	OK	0.715043	1.31876	0.88308	-0.941018	0.346696	0.734844	no
Glyma01g26230	Glyma01g26230	Glyma01g26230	Gm01:34508385-34510490	14-7-0	2014-07-07	OK	4.41784	13.0418	1.56173	-2.3989	0.0164442	0.14523	no
Glyma01g26300	Glyma01g26300	Glyma01g26300	Gm01:34545482-34547230	14-7-0	2014-07-07	OK	2.19663	7.58753	1.78834	-2.32448	0.0200998	0.162682	no
Glyma01g26310	Glyma01g26310	Glyma01g26310	Gm01:34591834-34592752	14-7-0	2014-07-07	NOTEST	0	0	0	0	1	1	no
Glyma01g26325	Glyma01g26325	Glyma01g26325	Gm01:34678298-34679472	14-7-0	2014-07-07	NOTEST	0	0	0	0	1	1	no
Glyma01g26340	Glyma01g26340	Glyma01g26340	Gm01:34729733-34732217	14-7-0	2014-07-07	NOTEST	0	0.176231	1.79769e+308	1.79769e+308	0.0416395	1	no
Glyma01g26350	Glyma01g26350	Glyma01g26350	Gm01:34828578-34838846	14-7-0	2014-07-07	OK	2.96791	2.74202	-0.114209	0.179062	0.857889	0.967484	no
Glyma01g26360	Glyma01g26360	Glyma01g26360	Gm01:34923320-34923989	14-7-0	2014-07-07	OK	3.24428	11.3508	1.80683	-2.22632	0.0259925	0.189334	no
Glyma01g26570	Glyma01g26570	Glyma01g26570	Gm01:35047812-35050350	14-7-0	2014-07-07	NOTEST	0	0	0	0	1	1	no
Glyma01g26580	Glyma01g26580	Glyma01g26580	Gm01:35128362-35132942	14-7-0	2014-07-07	OK	0	1.52445	1.79769e+308	1.79769e+308	0.0141268	0.13281	no
Glyma01g26590	Glyma01g26590	Glyma01g26590	Gm01:35185581-35190582	14-7-0	2014-07-07	NOTEST	0.0366671	0.131545	1.843	-1.49438	0.135076	1	no
Glyma01g26600	Glyma01g26600	Glyma01g26600	Gm01:35191726-35193878	14-7-0	2014-07-07	OK	3.59038	3.92111	0.127126	-0.173432	0.862312	0.968431	no
Glyma01g26606	Glyma01g26606	Glyma01g26606	Gm01:35221753-35222332	14-7-0	2014-07-07	NOTEST	0	0	0	0	1	1	no
Glyma01g26613	Glyma01g26613	Glyma01g26613	Gm01:35260947-35261763	14-7-0	2014-07-07	NOTEST	0	0	0	0	1	1	no
Glyma01g26620	Glyma01g26620	Glyma01g26620	Gm01:35271480-35272153	14-7-0	2014-07-07	NOTEST	0	0	0	0	1	1	no
Glyma01g26650	Glyma01g26650	Glyma01g26650	Gm01:35317654-35328670	14-7-0	2014-07-07	OK	1.77554	1.70142	-0.0615226	0.0767239	0.938843	0.987613	no
Glyma01g26670	Glyma01g26670	Glyma01g26670	Gm01:35431736-35435954	14-7-0	2014-07-07	OK	0.273482	1.06484	1.96112	-1.88483	0.0594531	0.304404	no
Glyma01g26681	Glyma01g26681	Glyma01g26681	Gm01:35464370-35465052	14-7-0	2014-07-07	NOTEST	0	0	0	0	1	1	no
Glyma01g26690	Glyma01g26690	Glyma01g26690	Gm01:35468032-35472931	14-7-0	2014-07-07	OK	0.491522	0.79103	0.686478	-0.674215	0.500175	0.83645	no
Glyma01g26700	Glyma01g26700	Glyma01g26700	Gm01:35501543-35506434	14-7-0	2014-07-07	OK	1.21763	2.12215	0.801455	-1.00878	0.31308	0.705031	no
Glyma01g26750	Glyma01g26750	Glyma01g26750	Gm01:35572394-35581615	14-7-0	2014-07-07	NOTEST	0.0858813	0.0316831	-1.43863	0.550382	0.582057	1	no
Glyma01g26766	Glyma01g26766	Glyma01g26766	Gm01:35587717-35588464	14-7-0	2014-07-07	NOTEST	0	0	0	0	1	1	no
Glyma01g26783	Glyma01g26783	Glyma01g26783	Gm01:35595556-35596652	14-7-0	2014-07-07	NOTEST	0	0	0	0	1	1	no
Glyma01g26800	Glyma01g26800	Glyma01g26800	Gm01:35606472-35610217	14-7-0	2014-07-07	NOTEST	0	0	0	0	1	1	no
Glyma01g26813	Glyma01g26813	Glyma01g26813	Gm01:35625153-35625890	14-7-0	2014-07-07	NOTEST	0	0	0	0	1	1	no
Glyma01g26826	Glyma01g26826	Glyma01g26826	Gm01:35632686-35633208	14-7-0	2014-07-07	NOTEST	0	0	0	0	1	1	no
Glyma01g26840	Glyma01g26840	Glyma01g26840	Gm01:35643767-35646603	14-7-0	2014-07-07	OK	3.06034	3.46149	0.177698	-0.231061	0.817268	0.957065	no
Glyma01g26860	Glyma01g26860	Glyma01g26860	Gm01:35688241-35692239	14-7-0	2014-07-07	NOTEST	0	0	0	0	1	1	no
Glyma01g26900	Glyma01g26900	Glyma01g26900	Gm01:35719443-35723183	14-7-0	2014-07-07	NOTEST	0	0	0	0	1	1	no
Glyma01g26915	Glyma01g26915	Glyma01g26915	Gm01:35827768-35828303	14-7-0	2014-07-07	NOTEST	0	0	0	0	1	1	no
Glyma01g26930	Glyma01g26930	Glyma01g26930	Gm01:35832934-35837033	14-7-0	2014-07-07	OK	32.2438	19.2387	-0.745006	1.05245	0.292592	0.686506	no
Glyma01g26940	Glyma01g26940	Glyma01g26940	Gm01:35863797-35865409	14-7-0	2014-07-07	OK	0.773039	3.93132	2.3464	-2.83536	0.00457736	0.0631287	no
Glyma01g26950	Glyma01g26950	Glyma01g26950	Gm01:35866292-35869400	14-7-0	2014-07-07	OK	27.3103	44.1011	0.691372	-1.10345	0.269834	0.660875	no
Glyma01g26961	Glyma01g26961	Glyma01g26961	Gm01:35952581-35954091	14-7-0	2014-07-07	NOTEST	0	0	0	0	1	1	no
Glyma01g26970	Glyma01g26970	Glyma01g26970	Gm01:35963018-35964248	14-7-0	2014-07-07	OK	53.1923	11.5761	-2.20007	3.58652	0.000335117	0.0104202	yes
Glyma01g26981	Glyma01g26981	Glyma01g26981	Gm01:35964318-35966630	14-7-0	2014-07-07	OK	3.6694	1.44979	-1.3397	1.18995	0.234068	0.618575	no
Glyma01g26990	Glyma01g26990	Glyma01g26990	Gm01:35968043-35972769	14-7-0	2014-07-07	OK	5.77157	12.3867	1.10176	-1.84005	0.0657615	0.322351	no
Glyma01g27005	Glyma01g27005	Glyma01g27005	Gm01:35977333-35983210	14-7-0	2014-07-07	OK	3.8255	0.480842	-2.99202	3.83401	0.00012607	0.00501536	yes
Glyma01g27020	Glyma01g27020	Glyma01g27020	Gm01:36004326-36005428	14-7-0	2014-07-07	NOTEST	0.0322981	0	-1.79769e+308	-1.79769e+308	0.266347	1	no
Glyma01g27040	Glyma01g27040	Glyma01g27040	Gm01:36021672-36025699	14-7-0	2014-07-07	OK	0.0995081	1.00568	3.33722	-3.10186	0.00192306	0.0350948	yes
Glyma01g27060	Glyma01g27060	Glyma01g27060	Gm01:36063450-36065354	14-7-0	2014-07-07	OK	0.848444	3.61207	2.08994	-2.55222	0.0107038	0.110948	no
Glyma01g27110	Glyma01g27110	Glyma01g27110	Gm01:36127733-36131641	14-7-0	2014-07-07	NOTEST	0	0	0	0	1	1	no
Glyma01g27120	Glyma01g27120	Glyma01g27120	Gm01:36147154-36151735	14-7-0	2014-07-07	OK	4.0992	1.36298	-1.58858	2.06254	0.0391565	0.23862	no
Glyma01g27130	Glyma01g27130	Glyma01g27130	Gm01:36161870-36165133	14-7-0	2014-07-07	NOTEST	0.489713	0.395737	-0.307397	0.288734	0.772785	1	no
Glyma01g27145	Glyma01g27145	Glyma01g27145	Gm01:36192774-36194659	14-7-0	2014-07-07	NOTEST	0	0	0	0	1	1	no
Glyma01g27160	Glyma01g27160	Glyma01g27160	Gm01:36195997-36196273	14-7-0	2014-07-07	NOTEST	0	0	0	0	1	1	no
Glyma01g27170	Glyma01g27170	Glyma01g27170	Gm01:36211478-36213198	14-7-0	2014-07-07	OK	2.7424	2.11083	-0.37763	0.357723	0.72055	0.930319	no
Glyma01g27200	Glyma01g27200	Glyma01g27200	Gm01:36246044-36251145	14-7-0	2014-07-07	OK	9.31741	6.62545	-0.491912	0.802967	0.421994	0.789908	no
Glyma01g27215	Glyma01g27215	Glyma01g27215	Gm01:36263859-36271059	14-7-0	2014-07-07	OK	1.00993	0.224013	-2.1726	1.21398	0.224754	0.607649	no
Glyma01g27230	Glyma01g27230	Glyma01g27230	Gm01:36326563-36327062	14-7-0	2014-07-07	NOTEST	0	0	0	0	1	1	no
Glyma01g27240	Glyma01g27240	Glyma01g27240	Gm01:36332421-36351694	14-7-0	2014-07-07	OK	5.26926	4.4169	-0.254566	0.404328	0.685972	0.919941	no
Glyma01g27250	Glyma01g27250	Glyma01g27250	Gm01:36369066-36382267	14-7-0	2014-07-07	OK	6.1467	6.76421	0.138109	-0.233554	0.815331	0.95643	no
Glyma01g27260	Glyma01g27260	Glyma01g27260	Gm01:36388728-36391729	14-7-0	2014-07-07	NOTEST	0	0	0	0	1	1	no
Glyma01g27280	Glyma01g27280	Glyma01g27280	Gm01:36438459-36440199	14-7-0	2014-07-07	OK	0.292556	1.2936	2.14461	-2.13116	0.0330758	0.217643	no
Glyma01g27291	Glyma01g27291	Glyma01g27291	Gm01:36450899-36454001	14-7-0	2014-07-07	OK	0.229261	1.15136	2.32827	-1.20963	0.22642	0.609608	no
Glyma01g27301	Glyma01g27301	Glyma01g27301	Gm01:36450899-36454001	14-7-0	2014-07-07	NOTEST	0	0	0	0	1	1	no
Glyma01g27310	Glyma01g27310	Glyma01g27310	Gm01:36464465-36465566	14-7-0	2014-07-07	NOTEST	0	0	0	0	1	1	no
Glyma01g27360	Glyma01g27360	Glyma01g27360	Gm01:36545021-36547291	14-7-0	2014-07-07	NOTEST	0	0.213636	1.79769e+308	1.79769e+308	0.0268278	1	no
Glyma01g27385	Glyma01g27385	Glyma01g27385	Gm01:36610052-36610460	14-7-0	2014-07-07	NOTEST	0	0	0	0	1	1	no
Glyma01g27410	Glyma01g27410	Glyma01g27410	Gm01:36654803-36655111	14-7-0	2014-07-07	NOTEST	0	0	0	0	1	1	no
Glyma01g27440	Glyma01g27440	Glyma01g27440	Gm01:36685735-36695527	14-7-0	2014-07-07	NOTEST	0.037988	0.0160952	-1.23891	0.471288	0.637435	1	no
Glyma01g27455	Glyma01g27455	Glyma01g27455	Gm01:36705021-36712560	14-7-0	2014-07-07	NOTEST	0.136832	0.152379	0.155252	-0.147039	0.883101	1	no
Glyma01g27470	Glyma01g27470	Glyma01g27470	Gm01:36735448-36737186	14-7-0	2014-07-07	NOTEST	0	0	0	0	1	1	no
Glyma01g27490	Glyma01g27490	Glyma01g27490	Gm01:36794254-36798874	14-7-0	2014-07-07	NOTEST	0.0777077	0	-1.79769e+308	-1.79769e+308	0.117629	1	no
Glyma01g27710	Glyma01g27710	Glyma01g27710	Gm01:36987889-36992462	14-7-0	2014-07-07	OK	0.92747	3.58515	1.95066	-2.6041	0.00921153	0.10054	no
Glyma01g27720	Glyma01g27720	Glyma01g27720	Gm01:37036140-37038376	14-7-0	2014-07-07	NOTEST	0.493058	0.311157	-0.664113	0.621984	0.533952	1	no
Glyma01g27765	Glyma01g27765	Glyma01g27765	Gm01:37212445-37213145	14-7-0	2014-07-07	NOTEST	0	0	0	0	1	1	no
Glyma01g27810	Glyma01g27810	Glyma01g27810	Gm01:37231576-37233997	14-7-0	2014-07-07	OK	3.19223	8.00181	1.32576	-2.12438	0.0336387	0.219806	no
Glyma01g27840	Glyma01g27840	Glyma01g27840	Gm01:37299487-37305059	14-7-0	2014-07-07	OK	10.7666	19.3418	0.845154	-1.41547	0.156931	0.514605	no
Glyma01g27860	Glyma01g27860	Glyma01g27860	Gm01:37321469-37321784	14-7-0	2014-07-07	NOTEST	0	0	0	0	1	1	no
Glyma01g27890	Glyma01g27890	Glyma01g27890	Gm01:37336991-37338203	14-7-0	2014-07-07	OK	0	3.78003	1.79769e+308	1.79769e+308	0.00416679	0.0590612	no
Glyma01g27900	Glyma01g27900	Glyma01g27900	Gm01:37379998-37383931	14-7-0	2014-07-07	OK	4.87213	22.5864	2.21283	-3.58002	0.000343569	0.0105546	yes
Glyma01g27910	Glyma01g27910	Glyma01g27910	Gm01:37406845-37408224	14-7-0	2014-07-07	NOTEST	0	0	0	0	1	1	no
Glyma01g27941	Glyma01g27941	Glyma01g27941	Gm01:37433263-37434146	14-7-0	2014-07-07	NOTEST	0	0	0	0	1	1	no
Glyma01g27970	Glyma01g27970	Glyma01g27970	Gm01:37457417-37460795	14-7-0	2014-07-07	NOTEST	0	0.112746	1.79769e+308	1.79769e+308	0.0980491	1	no
Glyma01g28026	Glyma01g28026	Glyma01g28026	Gm01:37580338-37581229	14-7-0	2014-07-07	NOTEST	0	0	0	0	1	1	no
Glyma01g28082	Glyma01g28082	Glyma01g28082	Gm01:37587054-37587942	14-7-0	2014-07-07	NOTEST	0	0	0	0	1	1	no
Glyma01g28139	Glyma01g28139	Glyma01g28139	Gm01:37594369-37595242	14-7-0	2014-07-07	NOTEST	0	0	0	0	1	1	no
Glyma01g28196	Glyma01g28196	Glyma01g28196	Gm01:37611247-37612183	14-7-0	2014-07-07	NOTEST	0	0	0	0	1	1	no
Glyma01g28253	Glyma01g28253	Glyma01g28253	Gm01:37911350-37912244	14-7-0	2014-07-07	NOTEST	0	0	0	0	1	1	no
Glyma01g28310	Glyma01g28310	Glyma01g28310	Gm01:37913283-37917411	14-7-0	2014-07-07	OK	0.555425	5.76388	3.37538	-3.83391	0.000126124	0.00501536	yes
Glyma01g28353	Glyma01g28353	Glyma01g28353	Gm01:38060909-38061301	14-7-0	2014-07-07	NOTEST	0	0	0	0	1	1	no
Glyma01g28396	Glyma01g28396	Glyma01g28396	Gm01:38199627-38200321	14-7-0	2014-07-07	OK	316.829	123.459	-1.35968	2.17099	0.0299318	0.206081	no
Glyma01g28440	Glyma01g28440	Glyma01g28440	Gm01:38205261-38207629	14-7-0	2014-07-07	OK	0.0980523	1.61749	4.04406	-3.89856	9.67677e-05	0.00409214	yes
Glyma01g28460	Glyma01g28460	Glyma01g28460	Gm01:38222786-38224222	14-7-0	2014-07-07	NOTEST	0	0	0	0	1	1	no
Glyma01g28480	Glyma01g28480	Glyma01g28480	Gm01:38248791-38250401	14-7-0	2014-07-07	NOTEST	0	0	0	0	1	1	no
Glyma01g28491	Glyma01g28491	Glyma01g28491	Gm01:38259681-38270227	14-7-0	2014-07-07	NOTEST	0	0	0	0	1	1	no
Glyma01g28500	Glyma01g28500	Glyma01g28500	Gm01:38308110-38309077	14-7-0	2014-07-07	OK	71.1505	102.452	0.526002	-0.859861	0.389866	0.767441	no
Glyma01g28511	Glyma01g28511	Glyma01g28511	Gm01:38309608-38311167	14-7-0	2014-07-07	NOTEST	0.052682	0	-1.79769e+308	-1.79769e+308	0.139932	1	no
Glyma01g28520	Glyma01g28520	Glyma01g28520	Gm01:38386523-38391051	14-7-0	2014-07-07	OK	4.92521	1.48012	-1.73448	1.93262	0.0532825	0.285504	no
Glyma01g28550	Glyma01g28550	Glyma01g28550	Gm01:38422858-38424428	14-7-0	2014-07-07	NOTEST	0	0	0	0	1	1	no
Glyma01g28626	Glyma01g28626	Glyma01g28626	Gm01:38529390-38530425	14-7-0	2014-07-07	NOTEST	0	0	0	0	1	1	no
Glyma01g28703	Glyma01g28703	Glyma01g28703	Gm01:38575000-38577422	14-7-0	2014-07-07	OK	0.0701782	1.69306	4.59246	-2.32777	0.0199244	0.16169	no
Glyma01g28780	Glyma01g28780	Glyma01g28780	Gm01:38596171-38598279	14-7-0	2014-07-07	NOTEST	0.0740803	0.171679	1.21255	-0.95415	0.340008	1	no
Glyma01g28800	Glyma01g28800	Glyma01g28800	Gm01:38660680-38662575	14-7-0	2014-07-07	NOTEST	0	0	0	0	1	1	no
Glyma01g28805	Glyma01g28805	Glyma01g28805	Gm01:38690273-38690984	14-7-0	2014-07-07	NOTEST	0	0	0	0	1	1	no
Glyma01g28810	Glyma01g28810	Glyma01g28810	Gm01:38692764-38695649	14-7-0	2014-07-07	OK	1257	2618.61	1.05881	-0.909046	0.363326	0.747191	no
Glyma01g28820	Glyma01g28820	Glyma01g28820	Gm01:38703774-38707276	14-7-0	2014-07-07	OK	40.2411	44.8473	0.15635	-0.224564	0.822318	0.958214	no
Glyma01g28830	Glyma01g28830	Glyma01g28830	Gm01:38709310-38713735	14-7-0	2014-07-07	OK	19.7735	8.53542	-1.21203	2.01311	0.0441033	0.255752	no
Glyma01g28841	Glyma01g28841	Glyma01g28841	Gm01:38749817-38751606	14-7-0	2014-07-07	NOTEST	0	0	0	0	1	1	no
Glyma01g28850	Glyma01g28850	Glyma01g28850	Gm01:38758937-38772979	14-7-0	2014-07-07	NOTEST	0	0	0	0	1	1	no
Glyma01g28865	Glyma01g28865	Glyma01g28865	Gm01:38774846-38778332	14-7-0	2014-07-07	NOTEST	0.0554265	0.0848061	0.613591	-0.352626	0.724369	1	no
Glyma01g28880	Glyma01g28880	Glyma01g28880	Gm01:38811474-38819368	14-7-0	2014-07-07	NOTEST	0	0	0	0	1	1	no
Glyma01g28890	Glyma01g28890	Glyma01g28890	Gm01:38825959-38830479	14-7-0	2014-07-07	NOTEST	0	0	0	0	1	1	no
Glyma01g28936	Glyma01g28936	Glyma01g28936	Gm01:38986023-38989868	14-7-0	2014-07-07	OK	1.40848	0.351636	-2.00198	2.37212	0.0176864	0.151044	no
Glyma01g28983	Glyma01g28983	Glyma01g28983	Gm01:39101552-39101978	14-7-0	2014-07-07	NOTEST	0	0	0	0	1	1	no
Glyma01g29030	Glyma01g29030	Glyma01g29030	Gm01:39117816-39121119	14-7-0	2014-07-07	NOTEST	0.0566821	0.194534	1.77906	-1.44253	0.149153	1	no
Glyma01g29070	Glyma01g29070	Glyma01g29070	Gm01:39200746-39201279	14-7-0	2014-07-07	NOTEST	0	0	0	0	1	1	no
Glyma01g29091	Glyma01g29091	Glyma01g29091	Gm01:39202322-39203074	14-7-0	2014-07-07	NOTEST	0	0	0	0	1	1	no
Glyma01g29110	Glyma01g29110	Glyma01g29110	Gm01:39206637-39207905	14-7-0	2014-07-07	NOTEST	0	0	0	0	1	1	no
Glyma01g29131	Glyma01g29131	Glyma01g29131	Gm01:39211228-39211501	14-7-0	2014-07-07	NOTEST	0	0	0	0	1	1	no
Glyma01g29150	Glyma01g29150	Glyma01g29150	Gm01:39249319-39254445	14-7-0	2014-07-07	OK	1.25055	1.98014	0.663034	-0.924198	0.355383	0.742439	no
Glyma01g29171	Glyma01g29171	Glyma01g29171	Gm01:39255360-39265417	14-7-0	2014-07-07	OK	0.270376	0.884382	1.7097	-1.51682	0.129313	0.467952	no
Glyma01g29190	Glyma01g29190	Glyma01g29190	Gm01:39285279-39288819	14-7-0	2014-07-07	NOTEST	0	0	0	0	1	1	no
Glyma01g29220	Glyma01g29220	Glyma01g29220	Gm01:39316166-39317298	14-7-0	2014-07-07	NOTEST	0	0	0	0	1	1	no
Glyma01g29230	Glyma01g29230	Glyma01g29230	Gm01:39317900-39318629	14-7-0	2014-07-07	NOTEST	0	0	0	0	1	1	no
Glyma01g29255	Glyma01g29255	Glyma01g29255	Gm01:39318953-39319509	14-7-0	2014-07-07	NOTEST	0	0	0	0	1	1	no
Glyma01g29280	Glyma01g29280	Glyma01g29280	Gm01:39350672-39358098	14-7-0	2014-07-07	OK	2.30996	3.66927	0.667626	-0.924851	0.355044	0.742309	no
Glyma01g29305	Glyma01g29305	Glyma01g29305	Gm01:39376341-39388072	14-7-0	2014-07-07	OK	0.551427	2.93376	2.41151	-2.5413	0.011044	0.113329	no
Glyma01g29330	Glyma01g29330	Glyma01g29330	Gm01:39403861-39412277	14-7-0	2014-07-07	OK	2.63136	5.77403	1.13377	-1.74697	0.0806424	0.361887	no
Glyma01g29346	Glyma01g29346	Glyma01g29346	Gm01:39421332-39429591	14-7-0	2014-07-07	OK	0.87513	1.59106	0.862417	-0.915838	0.359752	0.745401	no
Glyma01g29362	Glyma01g29362	Glyma01g29362	Gm01:39443729-39458833	14-7-0	2014-07-07	OK	5.72224	5.88741	0.041052	-0.0669697	0.946606	0.989195	no
Glyma01g29378	Glyma01g29378	Glyma01g29378	Gm01:39478263-39516299	14-7-0	2014-07-07	OK	2.13135	3.09234	0.536933	-0.832997	0.404847	0.777279	no
Glyma01g29394	Glyma01g29394	Glyma01g29394	Gm01:39526777-39530894	14-7-0	2014-07-07	NOTEST	0	0	0	0	1	1	no
Glyma01g29410	Glyma01g29410	Glyma01g29410	Gm01:39591646-39594997	14-7-0	2014-07-07	OK	0.870222	1.65306	0.925684	-1.04337	0.296778	0.690646	no
Glyma01g29420	Glyma01g29420	Glyma01g29420	Gm01:39597740-39602942	14-7-0	2014-07-07	OK	20.1355	12.0107	-0.74542	1.25066	0.211058	0.589808	no
Glyma01g29440	Glyma01g29440	Glyma01g29440	Gm01:39655886-39656000	14-7-0	2014-07-07	NOTEST	0	0	0	0	1	1	no
Glyma01g29470	Glyma01g29470	Glyma01g29470	Gm01:39787035-39797571	14-7-0	2014-07-07	OK	4.48104	4.40706	-0.0240177	0.0385434	0.969254	0.994291	no
Glyma01g29480	Glyma01g29480	Glyma01g29480	Gm01:39799515-39801235	14-7-0	2014-07-07	NOTEST	0	0	0	0	1	1	no
Glyma01g29495	Glyma01g29495	Glyma01g29495	Gm01:39818462-39819244	14-7-0	2014-07-07	NOTEST	0	0	0	0	1	1	no
Glyma01g29511	Glyma01g29511	Glyma01g29511	Gm01:39824538-39825839	14-7-0	2014-07-07	NOTEST	0	0	0	0	1	1	no
Glyma01g29525	Glyma01g29525	Glyma01g29525	Gm01:39837032-39837374	14-7-0	2014-07-07	NOTEST	0	0	0	0	1	1	no
Glyma01g29540	Glyma01g29540	Glyma01g29540	Gm01:39848379-39851083	14-7-0	2014-07-07	OK	23.2438	19.148	-0.279654	0.471308	0.637421	0.904091	no
Glyma01g29570	Glyma01g29570	Glyma01g29570	Gm01:39879227-39883100	14-7-0	2014-07-07	NOTEST	0	0	0	0	1	1	no
Glyma01g29580	Glyma01g29580	Glyma01g29580	Gm01:39898856-39902291	14-7-0	2014-07-07	NOTEST	0	0	0	0	1	1	no
Glyma01g29600	Glyma01g29600	Glyma01g29600	Gm01:39918097-39921140	14-7-0	2014-07-07	NOTEST	0	0	0	0	1	1	no
Glyma01g29615	Glyma01g29615	Glyma01g29615	Gm01:39935345-39939812	14-7-0	2014-07-07	NOTEST	0	0	0	0	1	1	no
Glyma01g29630	Glyma01g29630	Glyma01g29630	Gm01:39945735-39949387	14-7-0	2014-07-07	OK	22.4675	21.9287	-0.0350229	0.0551716	0.956002	0.991538	no
Glyma01g29643	Glyma01g29643	Glyma01g29643	Gm01:39958765-39959672	14-7-0	2014-07-07	NOTEST	0	0	0	0	1	1	no
Glyma01g29656	Glyma01g29656	Glyma01g29656	Gm01:39965927-39966511	14-7-0	2014-07-07	NOTEST	0	0	0	0	1	1	no
Glyma01g29670	Glyma01g29670	Glyma01g29670	Gm01:39988960-39991138	14-7-0	2014-07-07	NOTEST	0	0.150548	1.79769e+308	1.79769e+308	0.0539625	1	no
Glyma01g29715	Glyma01g29715	Glyma01g29715	Gm01:40029815-40030406	14-7-0	2014-07-07	NOTEST	0	0.12843	1.79769e+308	1.79769e+308	0.259019	1	no
Glyma01g29760	Glyma01g29760	Glyma01g29760	Gm01:40077200-40079998	14-7-0	2014-07-07	NOTEST	0	0.102454	1.79769e+308	1.79769e+308	0.0739066	1	no
Glyma01g29816	Glyma01g29816	Glyma01g29816	Gm01:40154962-40155672	14-7-0	2014-07-07	NOTEST	0.0716036	0.0452146	-0.663242	0.169502	0.865402	1	no
Glyma01g29873	Glyma01g29873	Glyma01g29873	Gm01:40234344-40236298	14-7-0	2014-07-07	NOTEST	0	0	0	0	1	1	no
Glyma01g29930	Glyma01g29930	Glyma01g29930	Gm01:40499102-40503250	14-7-0	2014-07-07	OK	2.50164	6.73224	1.42821	-1.83761	0.0661193	0.323107	no
Glyma01g29950	Glyma01g29950	Glyma01g29950	Gm01:40560867-40564466	14-7-0	2014-07-07	OK	5.47867	9.48598	0.79197	-1.26829	0.204693	0.582633	no
Glyma01g29970	Glyma01g29970	Glyma01g29970	Gm01:40574051-40575558	14-7-0	2014-07-07	NOTEST	0	0	0	0	1	1	no
Glyma01g30000	Glyma01g30000	Glyma01g30000	Gm01:40668497-40669995	14-7-0	2014-07-07	NOTEST	0	0	0	0	1	1	no
Glyma01g30010	Glyma01g30010	Glyma01g30010	Gm01:40681967-40683465	14-7-0	2014-07-07	NOTEST	0	0	0	0	1	1	no
Glyma01g30020	Glyma01g30020	Glyma01g30020	Gm01:40733504-40735002	14-7-0	2014-07-07	NOTEST	0	0	0	0	1	1	no
Glyma01g30030	Glyma01g30030	Glyma01g30030	Gm01:40745198-40746696	14-7-0	2014-07-07	NOTEST	0	0	0	0	1	1	no
Glyma01g30040	Glyma01g30040	Glyma01g30040	Gm01:40756924-40758421	14-7-0	2014-07-07	NOTEST	0	0	0	0	1	1	no
Glyma01g30060	Glyma01g30060	Glyma01g30060	Gm01:40769686-40771162	14-7-0	2014-07-07	NOTEST	0	0	0	0	1	1	no
Glyma01g30080	Glyma01g30080	Glyma01g30080	Gm01:40777029-40778052	14-7-0	2014-07-07	NOTEST	0	0	0	0	1	1	no
Glyma01g30300	Glyma01g30300	Glyma01g30300	Gm01:40952282-40957143	14-7-0	2014-07-07	OK	1.56999	4.10179	1.38549	-1.8724	0.0611509	0.309479	no
Glyma01g30320	Glyma01g30320	Glyma01g30320	Gm01:40964890-40985483	14-7-0	2014-07-07	OK	7.63155	4.55212	-0.745437	1.227	0.219822	0.60255	no
Glyma01g30335	Glyma01g30335	Glyma01g30335	Gm01:40964890-40985483	14-7-0	2014-07-07	NOTEST	0.577171	0.311029	-0.89195	0.285352	0.775374	1	no
Glyma01g30350	Glyma01g30350	Glyma01g30350	Gm01:41014087-41016040	14-7-0	2014-07-07	OK	27.1012	85.8717	1.66383	-2.67794	0.00740772	0.0869167	no
Glyma01g30370	Glyma01g30370	Glyma01g30370	Gm01:41043490-41043758	14-7-0	2014-07-07	NOTEST	0	0	0	0	1	1	no
Glyma01g30390	Glyma01g30390	Glyma01g30390	Gm01:41062775-41066889	14-7-0	2014-07-07	OK	8.46979	2.97937	-1.50732	2.23539	0.0253921	0.186198	no
Glyma01g30400	Glyma01g30400	Glyma01g30400	Gm01:41067190-41075707	14-7-0	2014-07-07	OK	9.5623	8.27146	-0.209217	0.352147	0.724728	0.931272	no
Glyma01g30431	Glyma01g30431	Glyma01g30431	Gm01:41163921-41165539	14-7-0	2014-07-07	NOTEST	0	0	0	0	1	1	no
Glyma01g30460	Glyma01g30460	Glyma01g30460	Gm01:41170972-41176563	14-7-0	2014-07-07	NOTEST	0.0960101	0	-1.79769e+308	-1.79769e+308	0.204481	1	no
Glyma01g30485	Glyma01g30485	Glyma01g30485	Gm01:41170972-41176563	14-7-0	2014-07-07	NOTEST	0	0	0	0	1	1	no
Glyma01g30511	Glyma01g30511	Glyma01g30511	Gm01:41210645-41210897	14-7-0	2014-07-07	NOTEST	0	0	0	0	1	1	no
Glyma01g30535	Glyma01g30535	Glyma01g30535	Gm01:41215563-41218988	14-7-0	2014-07-07	NOTEST	0	0	0	0	1	1	no
Glyma01g30560	Glyma01g30560	Glyma01g30560	Gm01:41232630-41234794	14-7-0	2014-07-07	NOTEST	0	0	0	0	1	1	no
Glyma01g30610	Glyma01g30610	Glyma01g30610	Gm01:41406971-41411553	14-7-0	2014-07-07	NOTEST	0	0	0	0	1	1	no
Glyma01g30626	Glyma01g30626	Glyma01g30626	Gm01:41440314-41440973	14-7-0	2014-07-07	NOTEST	0	0	0	0	1	1	no
Glyma01g30643	Glyma01g30643	Glyma01g30643	Gm01:41457347-41461938	14-7-0	2014-07-07	NOTEST	0	0	0	0	1	1	no
Glyma01g30660	Glyma01g30660	Glyma01g30660	Gm01:41493462-41493999	14-7-0	2014-07-07	NOTEST	0	0	0	0	1	1	no
Glyma01g30670	Glyma01g30670	Glyma01g30670	Gm01:41495108-41496829	14-7-0	2014-07-07	NOTEST	0	0	0	0	1	1	no
Glyma01g30900	Glyma01g30900	Glyma01g30900	Gm01:41673575-41673782	14-7-0	2014-07-07	NOTEST	0	0	0	0	1	1	no
Glyma01g30910	Glyma01g30910	Glyma01g30910	Gm01:41681659-41690953	14-7-0	2014-07-07	OK	11.0258	11.1621	0.0177348	-0.0294309	0.976521	0.995201	no
Glyma01g30920	Glyma01g30920	Glyma01g30920	Gm01:41691541-41699290	14-7-0	2014-07-07	NOTEST	0.0372634	0.240708	2.69145	-1.74378	0.0811966	1	no
Glyma01g30982	Glyma01g30982	Glyma01g30982	Gm01:41712879-41714252	14-7-0	2014-07-07	OK	1.18077	1.9316	0.710074	-0.779699	0.435568	0.798658	no
Glyma01g31044	Glyma01g31044	Glyma01g31044	Gm01:41890431-41892644	14-7-0	2014-07-07	OK	1.42701	2.36237	0.727238	-0.87599	0.381035	0.761132	no
Glyma01g31107	Glyma01g31107	Glyma01g31107	Gm01:41928201-41933073	14-7-0	2014-07-07	NOTEST	0.153496	0	-1.79769e+308	-1.79769e+308	0.066394	1	no
Glyma01g31170	Glyma01g31170	Glyma01g31170	Gm01:41986790-41991338	14-7-0	2014-07-07	OK	1.40712	2.87159	1.02911	-1.53419	0.124983	0.459732	no
Glyma01g31180	Glyma01g31180	Glyma01g31180	Gm01:41992765-41993572	14-7-0	2014-07-07	OK	0.126101	1.63167	3.6937	-2.44974	0.0142958	0.133836	no
Glyma01g31230	Glyma01g31230	Glyma01g31230	Gm01:42040491-42046500	14-7-0	2014-07-07	NOTEST	0	0	0	0	1	1	no
Glyma01g31260	Glyma01g31260	Glyma01g31260	Gm01:42062020-42069161	14-7-0	2014-07-07	OK	2.9378	6.05451	1.04327	-1.53593	0.124556	0.458876	no
Glyma01g31270	Glyma01g31270	Glyma01g31270	Gm01:42071523-42074445	14-7-0	2014-07-07	OK	15.8441	14.3824	-0.139638	0.234662	0.814471	0.95643	no
Glyma01g31275	Glyma01g31275	Glyma01g31275	Gm01:42077853-42078844	14-7-0	2014-07-07	NOTEST	0	0	0	0	1	1	no
Glyma01g31280	Glyma01g31280	Glyma01g31280	Gm01:42077853-42078844	14-7-0	2014-07-07	NOTEST	0	0	0	0	1	1	no
Glyma01g31300	Glyma01g31300	Glyma01g31300	Gm01:42124055-42127597	14-7-0	2014-07-07	OK	45.0908	2.72748	-4.04719	5.63594	1.74107e-08	4.56235e-06	yes
Glyma01g31311	Glyma01g31311	Glyma01g31311	Gm01:42143417-42149831	14-7-0	2014-07-07	OK	6.35206	7.18002	0.176763	-0.260444	0.794522	0.951291	no
Glyma01g31320	Glyma01g31320	Glyma01g31320	Gm01:42162374-42164312	14-7-0	2014-07-07	OK	5.54478	6.40441	0.207938	-0.327186	0.743527	0.93677	no
Glyma01g31341	Glyma01g31341	Glyma01g31341	Gm01:42226588-42230852	14-7-0	2014-07-07	NOTEST	0.0484393	0.0785915	0.698196	-0.401248	0.688237	1	no
Glyma01g31360	Glyma01g31360	Glyma01g31360	Gm01:42232501-42236451	14-7-0	2014-07-07	OK	13.3489	17.1825	0.36422	-0.55285	0.580366	0.880657	no
Glyma01g31370	Glyma01g31370	Glyma01g31370	Gm01:42261741-42265856	14-7-0	2014-07-07	NOTEST	0.338993	0.17526	-0.951754	0.859067	0.390304	1	no
Glyma01g31425	Glyma01g31425	Glyma01g31425	Gm01:42373253-42374275	14-7-0	2014-07-07	OK	0.868211	1.63943	0.917079	-0.752487	0.451758	0.806796	no
Glyma01g31480	Glyma01g31480	Glyma01g31480	Gm01:42378220-42384123	14-7-0	2014-07-07	OK	0.55363	0.63461	0.196948	-0.224583	0.822304	0.958214	no
Glyma01g31520	Glyma01g31520	Glyma01g31520	Gm01:42469464-42474210	14-7-0	2014-07-07	NOTEST	0	0	0	0	1	1	no
Glyma01g31550	Glyma01g31550	Glyma01g31550	Gm01:42548413-42558287	14-7-0	2014-07-07	NOTEST	0	0	0	0	1	1	no
Glyma01g31570	Glyma01g31570	Glyma01g31570	Gm01:42586307-42593931	14-7-0	2014-07-07	OK	6.05159	3.3308	-0.861447	1.31605	0.188159	0.559205	no
Glyma01g31581	Glyma01g31581	Glyma01g31581	Gm01:42597638-42599280	14-7-0	2014-07-07	NOTEST	0	0	0	0	1	1	no
Glyma01g31590	Glyma01g31590	Glyma01g31590	Gm01:42607296-42611243	14-7-0	2014-07-07	NOTEST	0.116517	0.100123	-0.218777	0.188259	0.850673	1	no
Glyma01g31600	Glyma01g31600	Glyma01g31600	Gm01:42628300-42629673	14-7-0	2014-07-07	OK	34.9229	32.3774	-0.109185	0.182543	0.855157	0.967146	no
Glyma01g31610	Glyma01g31610	Glyma01g31610	Gm01:42631340-42634983	14-7-0	2014-07-07	OK	24.96	15.8313	-0.656833	1.09875	0.271878	0.662566	no
Glyma01g31630	Glyma01g31630	Glyma01g31630	Gm01:42661065-42664809	14-7-0	2014-07-07	OK	0.312602	1.11863	1.83934	-1.49141	0.135854	0.480755	no
Glyma01g31636	Glyma01g31636	Glyma01g31636	Gm01:42667422-42670895	14-7-0	2014-07-07	NOTEST	0	0	0	0	1	1	no
Glyma01g31643	Glyma01g31643	Glyma01g31643	Gm01:42681129-42683618	14-7-0	2014-07-07	NOTEST	0	0	0	0	1	1	no
Glyma01g31650	Glyma01g31650	Glyma01g31650	Gm01:42697267-42701819	14-7-0	2014-07-07	NOTEST	0	0	0	0	1	1	no
Glyma01g31660	Glyma01g31660	Glyma01g31660	Gm01:42724418-42726114	14-7-0	2014-07-07	NOTEST	0	0.118398	1.79769e+308	1.79769e+308	0.0980491	1	no
Glyma01g31670	Glyma01g31670	Glyma01g31670	Gm01:42752424-42753269	14-7-0	2014-07-07	NOTEST	0	0	0	0	1	1	no
Glyma01g31691	Glyma01g31691	Glyma01g31691	Gm01:42756407-42766923	14-7-0	2014-07-07	NOTEST	0	0	0	0	1	1	no
Glyma01g31711	Glyma01g31711	Glyma01g31711	Gm01:42786261-42789612	14-7-0	2014-07-07	NOTEST	0	0	0	0	1	1	no
Glyma01g31730	Glyma01g31730	Glyma01g31730	Gm01:42867418-42868294	14-7-0	2014-07-07	NOTEST	0	0	0	0	1	1	no
Glyma01g31750	Glyma01g31750	Glyma01g31750	Gm01:42942064-42943179	14-7-0	2014-07-07	OK	4.65439	6.2637	0.428425	-0.615897	0.537963	0.857959	no
Glyma01g31760	Glyma01g31760	Glyma01g31760	Gm01:42947350-42947710	14-7-0	2014-07-07	NOTEST	0	0	0	0	1	1	no
Glyma01g31780	Glyma01g31780	Glyma01g31780	Gm01:42956928-42957282	14-7-0	2014-07-07	NOTEST	0	0	0	0	1	1	no
Glyma01g31801	Glyma01g31801	Glyma01g31801	Gm01:43007888-43008997	14-7-0	2014-07-07	NOTEST	0	0	0	0	1	1	no
Glyma01g31820	Glyma01g31820	Glyma01g31820	Gm01:43013160-43013421	14-7-0	2014-07-07	NOTEST	0	0	0	0	1	1	no
Glyma01g31830	Glyma01g31830	Glyma01g31830	Gm01:43025615-43026886	14-7-0	2014-07-07	OK	3.37282	5.22158	0.630533	-0.875834	0.38112	0.761132	no
Glyma01g31840	Glyma01g31840	Glyma01g31840	Gm01:43069330-43072880	14-7-0	2014-07-07	OK	0.499411	1.40033	1.48747	-1.7893	0.0735663	0.343351	no
Glyma01g31850	Glyma01g31850	Glyma01g31850	Gm01:43076459-43079732	14-7-0	2014-07-07	NOTEST	0	0	0	0	1	1	no
Glyma01g31860	Glyma01g31860	Glyma01g31860	Gm01:43090292-43094391	14-7-0	2014-07-07	NOTEST	0	0	0	0	1	1	no
Glyma01g31890	Glyma01g31890	Glyma01g31890	Gm01:43130697-43137550	14-7-0	2014-07-07	OK	0.705053	0.565684	-0.317737	0.293954	0.768793	0.944457	no
Glyma01g31900	Glyma01g31900	Glyma01g31900	Gm01:43140964-43144007	14-7-0	2014-07-07	NOTEST	0	0.338892	1.79769e+308	1.79769e+308	0.031252	1	no
Glyma01g31910	Glyma01g31910	Glyma01g31910	Gm01:43154205-43156585	14-7-0	2014-07-07	NOTEST	0	0	0	0	1	1	no
Glyma01g31921	Glyma01g31921	Glyma01g31921	Gm01:43157131-43160950	14-7-0	2014-07-07	NOTEST	0.068332	0.176577	1.36967	-0.910805	0.362398	1	no
Glyma01g31930	Glyma01g31930	Glyma01g31930	Gm01:43173872-43179341	14-7-0	2014-07-07	OK	2.73253	0.321202	-3.08869	3.73772	0.000185697	0.00672172	yes
Glyma01g31940	Glyma01g31940	Glyma01g31940	Gm01:43217711-43224924	14-7-0	2014-07-07	NOTEST	0.244581	0.0384646	-2.66871	1.04902	0.294168	1	no
Glyma01g31961	Glyma01g31961	Glyma01g31961	Gm01:43241123-43245445	14-7-0	2014-07-07	NOTEST	0	0	0	0	1	1	no
Glyma01g31980	Glyma01g31980	Glyma01g31980	Gm01:43250905-43255641	14-7-0	2014-07-07	NOTEST	0.141785	0.107149	-0.404084	0.0633325	0.949502	1	no
Glyma01g31990	Glyma01g31990	Glyma01g31990	Gm01:43250905-43255641	14-7-0	2014-07-07	OK	7.3287	5.32038	-0.462029	0.672474	0.501282	0.836944	no
Glyma01g32000	Glyma01g32000	Glyma01g32000	Gm01:43264508-43272659	14-7-0	2014-07-07	OK	3.09622	4.40421	0.508372	-0.858446	0.390646	0.76773	no
Glyma01g32010	Glyma01g32010	Glyma01g32010	Gm01:43337913-43338530	14-7-0	2014-07-07	NOTEST	0	0	0	0	1	1	no
Glyma01g32020	Glyma01g32020	Glyma01g32020	Gm01:43341907-43343025	14-7-0	2014-07-07	NOTEST	0	0	0	0	1	1	no
Glyma01g32031	Glyma01g32031	Glyma01g32031	Gm01:43354010-43355755	14-7-0	2014-07-07	NOTEST	0	0	0	0	1	1	no
Glyma01g32040	Glyma01g32040	Glyma01g32040	Gm01:43398690-43400994	14-7-0	2014-07-07	NOTEST	0	0	0	0	1	1	no
Glyma01g32070	Glyma01g32070	Glyma01g32070	Gm01:43424973-43427243	14-7-0	2014-07-07	NOTEST	0	0	0	0	1	1	no
Glyma01g32081	Glyma01g32081	Glyma01g32081	Gm01:43450179-43450730	14-7-0	2014-07-07	NOTEST	0	0	0	0	1	1	no
Glyma01g32090	Glyma01g32090	Glyma01g32090	Gm01:43463846-43470841	14-7-0	2014-07-07	OK	3.1492	4.10611	0.382789	-0.587502	0.556867	0.867705	no
Glyma01g32103	Glyma01g32103	Glyma01g32103	Gm01:43463846-43470841	14-7-0	2014-07-07	NOTEST	0.145819	0.392941	1.43014	-0.260628	0.794379	1	no
Glyma01g32116	Glyma01g32116	Glyma01g32116	Gm01:43502972-43506823	14-7-0	2014-07-07	NOTEST	0	0.0361877	1.79769e+308	1.79769e+308	0.180329	1	no
Glyma01g32130	Glyma01g32130	Glyma01g32130	Gm01:43553617-43555903	14-7-0	2014-07-07	NOTEST	0	0.144659	1.79769e+308	1.79769e+308	0.118659	1	no
Glyma01g32140	Glyma01g32140	Glyma01g32140	Gm01:43570735-43574743	14-7-0	2014-07-07	OK	0.922145	0.748871	-0.300276	0.279315	0.780003	0.947528	no
Glyma01g32160	Glyma01g32160	Glyma01g32160	Gm01:43604977-43607065	14-7-0	2014-07-07	NOTEST	0	0	0	0	1	1	no
Glyma01g32190	Glyma01g32190	Glyma01g32190	Gm01:43621003-43623360	14-7-0	2014-07-07	NOTEST	0	0	0	0	1	1	no
Glyma01g32211	Glyma01g32211	Glyma01g32211	Gm01:43638172-43638537	14-7-0	2014-07-07	NOTEST	0	0	0	0	1	1	no
Glyma01g32230	Glyma01g32230	Glyma01g32230	Gm01:43687454-43687922	14-7-0	2014-07-07	NOTEST	0	0	0	0	1	1	no
Glyma01g32270	Glyma01g32270	Glyma01g32270	Gm01:43720350-43722510	14-7-0	2014-07-07	NOTEST	0	0	0	0	1	1	no
Glyma01g32291	Glyma01g32291	Glyma01g32291	Gm01:43773470-43774094	14-7-0	2014-07-07	NOTEST	0.537471	0	-1.79769e+308	-1.79769e+308	0.0928364	1	no
Glyma01g32310	Glyma01g32310	Glyma01g32310	Gm01:43784204-43786716	14-7-0	2014-07-07	NOTEST	0	0	0	0	1	1	no
Glyma01g32340	Glyma01g32340	Glyma01g32340	Gm01:43819827-43820154	14-7-0	2014-07-07	NOTEST	0	0	0	0	1	1	no
Glyma01g32360	Glyma01g32360	Glyma01g32360	Gm01:43828911-43832736	14-7-0	2014-07-07	NOTEST	0.0476694	0.0374465	-0.34823	0.168456	0.866224	1	no
Glyma01g32370	Glyma01g32370	Glyma01g32370	Gm01:43834206-43835697	14-7-0	2014-07-07	OK	2.22196	5.62527	1.34009	-1.80613	0.0708987	0.335963	no
Glyma01g32380	Glyma01g32380	Glyma01g32380	Gm01:43870379-43873398	14-7-0	2014-07-07	OK	1.25785	1.83438	0.544332	-0.736297	0.46155	0.813127	no
Glyma01g32390	Glyma01g32390	Glyma01g32390	Gm01:43912452-43917776	14-7-0	2014-07-07	NOTEST	0.088792	0.0731176	-0.28021	0.0875216	0.930257	1	no
Glyma01g32400	Glyma01g32400	Glyma01g32400	Gm01:43922908-43926832	14-7-0	2014-07-07	OK	2.45564	3.72937	0.602836	-0.928427	0.353186	0.740645	no
Glyma01g32415	Glyma01g32415	Glyma01g32415	Gm01:43929164-43930175	14-7-0	2014-07-07	NOTEST	0	0	0	0	1	1	no
Glyma01g32430	Glyma01g32430	Glyma01g32430	Gm01:43974483-43977133	14-7-0	2014-07-07	OK	0.340946	0.747315	1.13218	-1.25303	0.210196	0.589125	no
Glyma01g32440	Glyma01g32440	Glyma01g32440	Gm01:43989758-43991730	14-7-0	2014-07-07	OK	1.05103	0.818284	-0.361124	0.409158	0.682423	0.918958	no
Glyma01g32450	Glyma01g32450	Glyma01g32450	Gm01:44035709-44042969	14-7-0	2014-07-07	OK	58.5498	17.82	-1.71616	2.64121	0.00826093	0.0935272	no
Glyma01g32460	Glyma01g32460	Glyma01g32460	Gm01:44035709-44042969	14-7-0	2014-07-07	LOWDATA	0	0	-1.71616	0	1	1	no
Glyma01g32480	Glyma01g32480	Glyma01g32480	Gm01:44085644-44091881	14-7-0	2014-07-07	NOTEST	0	0	0	0	1	1	no
Glyma01g32680	Glyma01g32680	Glyma01g32680	Gm01:44207946-44213690	14-7-0	2014-07-07	OK	4.50913	1.33791	-1.75287	2.11007	0.0348524	0.223674	no
Glyma01g32690	Glyma01g32690	Glyma01g32690	Gm01:44229408-44236211	14-7-0	2014-07-07	OK	6.11517	5.72534	-0.0950326	0.159393	0.873359	0.971668	no
Glyma01g32750	Glyma01g32750	Glyma01g32750	Gm01:44319318-44320867	14-7-0	2014-07-07	OK	1696.51	2179.1	0.36116	-0.378861	0.704791	0.925642	no
Glyma01g32760	Glyma01g32760	Glyma01g32760	Gm01:44347887-44349526	14-7-0	2014-07-07	NOTEST	0	0.0844561	1.79769e+308	1.79769e+308	0.180329	1	no
Glyma01g32775	Glyma01g32775	Glyma01g32775	Gm01:44353224-44356977	14-7-0	2014-07-07	NOTEST	0	0	0	0	1	1	no
Glyma01g32790	Glyma01g32790	Glyma01g32790	Gm01:44365503-44368345	14-7-0	2014-07-07	OK	3.18965	3.7321	0.226587	-0.339607	0.734153	0.933943	no
Glyma01g32800	Glyma01g32800	Glyma01g32800	Gm01:44381434-44383734	14-7-0	2014-07-07	OK	0.75908	0.254061	-1.57907	1.42683	0.153629	0.510483	no
Glyma01g32810	Glyma01g32810	Glyma01g32810	Gm01:44384412-44392444	14-7-0	2014-07-07	OK	0.381741	0.794681	1.05778	-1.25393	0.209867	0.588683	no
Glyma01g32825	Glyma01g32825	Glyma01g32825	Gm01:44418267-44430426	14-7-0	2014-07-07	NOTEST	0.0509979	0	-1.79769e+308	-1.79769e+308	0.139932	1	no
Glyma01g32841	Glyma01g32841	Glyma01g32841	Gm01:44482207-44482737	14-7-0	2014-07-07	NOTEST	0.178869	0	-1.79769e+308	-1.79769e+308	0.139932	1	no
Glyma01g32855	Glyma01g32855	Glyma01g32855	Gm01:44489898-44494310	14-7-0	2014-07-07	NOTEST	0.0228819	0.223253	3.2864	-1.45737	0.145015	1	no
Glyma01g32870	Glyma01g32870	Glyma01g32870	Gm01:44497093-44498739	14-7-0	2014-07-07	OK	14.8972	19.0314	0.353334	-0.551568	0.581244	0.880962	no
Glyma01g32881	Glyma01g32881	Glyma01g32881	Gm01:44501342-44502103	14-7-0	2014-07-07	NOTEST	0.525954	0.560939	0.0929087	-0.0750362	0.940186	1	no
Glyma01g32890	Glyma01g32890	Glyma01g32890	Gm01:44504750-44507253	14-7-0	2014-07-07	OK	1.10082	0.581544	-0.920613	0.748414	0.45421	0.808362	no
Glyma01g32900	Glyma01g32900	Glyma01g32900	Gm01:44534734-44540055	14-7-0	2014-07-07	NOTEST	0	0	0	0	1	1	no
Glyma01g32920	Glyma01g32920	Glyma01g32920	Gm01:44562541-44564228	14-7-0	2014-07-07	NOTEST	0.415323	0.0648377	-2.67933	1.51023	0.130985	1	no
Glyma01g32940	Glyma01g32940	Glyma01g32940	Gm01:44595567-44597755	14-7-0	2014-07-07	NOTEST	0	0	0	0	1	1	no
Glyma01g32961	Glyma01g32961	Glyma01g32961	Gm01:44638341-44639787	14-7-0	2014-07-07	NOTEST	0	0	0	0	1	1	no
Glyma01g32981	Glyma01g32981	Glyma01g32981	Gm01:44662613-44664324	14-7-0	2014-07-07	NOTEST	0.143226	0.0345019	-2.05355	1.13348	0.257012	1	no
Glyma01g33000	Glyma01g33000	Glyma01g33000	Gm01:44707383-44712370	14-7-0	2014-07-07	NOTEST	0.343281	0.0606417	-2.50101	1.39748	0.162268	1	no
Glyma01g33017	Glyma01g33017	Glyma01g33017	Gm01:44713495-44722187	14-7-0	2014-07-07	OK	4.49098	2.90208	-0.629946	0.945824	0.344238	0.732307	no
Glyma01g33034	Glyma01g33034	Glyma01g33034	Gm01:44713495-44722187	14-7-0	2014-07-07	NOTEST	0.279988	0.226037	-0.308809	0.112263	0.910615	1	no
Glyma01g33052	Glyma01g33052	Glyma01g33052	Gm01:44724345-44725089	14-7-0	2014-07-07	NOTEST	0	0	0	0	1	1	no
Glyma01g33070	Glyma01g33070	Glyma01g33070	Gm01:44755155-44764276	14-7-0	2014-07-07	NOTEST	0	0	0	0	1	1	no
Glyma01g33080	Glyma01g33080	Glyma01g33080	Gm01:44784821-44785786	14-7-0	2014-07-07	NOTEST	0	0	0	0	1	1	no
Glyma01g33097	Glyma01g33097	Glyma01g33097	Gm01:44790872-44791190	14-7-0	2014-07-07	NOTEST	0	0	0	0	1	1	no
Glyma01g33114	Glyma01g33114	Glyma01g33114	Gm01:44806144-44806480	14-7-0	2014-07-07	NOTEST	0	0	0	0	1	1	no
Glyma01g33132	Glyma01g33132	Glyma01g33132	Gm01:44822529-44827918	14-7-0	2014-07-07	NOTEST	0	0	0	0	1	1	no
Glyma01g33150	Glyma01g33150	Glyma01g33150	Gm01:44831611-44835997	14-7-0	2014-07-07	NOTEST	0	0	0	0	1	1	no
Glyma01g33160	Glyma01g33160	Glyma01g33160	Gm01:44884977-44888493	14-7-0	2014-07-07	NOTEST	0	0	0	0	1	1	no
Glyma01g33170	Glyma01g33170	Glyma01g33170	Gm01:44905880-44910333	14-7-0	2014-07-07	NOTEST	0	0	0	0	1	1	no
Glyma01g33181	Glyma01g33181	Glyma01g33181	Gm01:44911452-44912574	14-7-0	2014-07-07	NOTEST	0	0	0	0	1	1	no
Glyma01g33191	Glyma01g33191	Glyma01g33191	Gm01:44940045-44941190	14-7-0	2014-07-07	NOTEST	0	0	0	0	1	1	no
Glyma01g33200	Glyma01g33200	Glyma01g33200	Gm01:44962980-44967133	14-7-0	2014-07-07	OK	14.1813	9.43162	-0.58841	0.977993	0.328078	0.718188	no
Glyma01g33220	Glyma01g33220	Glyma01g33220	Gm01:44980052-44984577	14-7-0	2014-07-07	OK	7.22364	8.32036	0.20392	-0.326555	0.744004	0.936861	no
Glyma01g33240	Glyma01g33240	Glyma01g33240	Gm01:45046813-45053379	14-7-0	2014-07-07	OK	4.93792	5.69362	0.205444	-0.343164	0.731475	0.933241	no
Glyma01g33270	Glyma01g33270	Glyma01g33270	Gm01:45164206-45167759	14-7-0	2014-07-07	OK	4.07017	10.4285	1.35737	-2.25371	0.0242143	0.181646	no
Glyma01g33281	Glyma01g33281	Glyma01g33281	Gm01:45184472-45185139	14-7-0	2014-07-07	NOTEST	0	0	0	0	1	1	no
Glyma01g33290	Glyma01g33290	Glyma01g33290	Gm01:45230344-45235073	14-7-0	2014-07-07	OK	2.56398	2.79064	0.122211	-0.188519	0.85047	0.96541	no
Glyma01g33300	Glyma01g33300	Glyma01g33300	Gm01:45287112-45288519	14-7-0	2014-07-07	NOTEST	0	0	0	0	1	1	no
Glyma01g33313	Glyma01g33313	Glyma01g33313	Gm01:45306250-45306442	14-7-0	2014-07-07	NOTEST	0	0	0	0	1	1	no
Glyma01g33326	Glyma01g33326	Glyma01g33326	Gm01:45317460-45320741	14-7-0	2014-07-07	NOTEST	0	0	0	0	1	1	no
Glyma01g33340	Glyma01g33340	Glyma01g33340	Gm01:45339891-45344677	14-7-0	2014-07-07	NOTEST	0.0624748	0.242688	1.95776	-1.23229	0.217843	1	no
Glyma01g33350	Glyma01g33350	Glyma01g33350	Gm01:45352146-45354813	14-7-0	2014-07-07	NOTEST	0	0.0819934	1.79769e+308	1.79769e+308	0.180329	1	no
Glyma01g33370	Glyma01g33370	Glyma01g33370	Gm01:45401644-45404974	14-7-0	2014-07-07	NOTEST	0.0773114	0.246063	1.67027	-1.05133	0.293106	1	no
Glyma01g33380	Glyma01g33380	Glyma01g33380	Gm01:45433046-45455133	14-7-0	2014-07-07	OK	1.18814	2.66863	1.1674	-1.11667	0.264133	0.654442	no
Glyma01g33420	Glyma01g33420	Glyma01g33420	Gm01:45530801-45532165	14-7-0	2014-07-07	NOTEST	0.0699551	0.183681	1.39271	-0.86576	0.386622	1	no
Glyma01g33430	Glyma01g33430	Glyma01g33430	Gm01:45548731-45551079	14-7-0	2014-07-07	NOTEST	0	0.0576417	1.79769e+308	1.79769e+308	0.180329	1	no
Glyma01g33440	Glyma01g33440	Glyma01g33440	Gm01:45561036-45565329	14-7-0	2014-07-07	NOTEST	0.0432827	0.0548501	0.341705	-0.196375	0.844317	1	no
Glyma01g33461	Glyma01g33461	Glyma01g33461	Gm01:45637083-45640786	14-7-0	2014-07-07	NOTEST	0	0	0	0	1	1	no
Glyma01g33480	Glyma01g33480	Glyma01g33480	Gm01:45640951-45643255	14-7-0	2014-07-07	NOTEST	0	0	0	0	1	1	no
Glyma01g33500	Glyma01g33500	Glyma01g33500	Gm01:45666010-45668198	14-7-0	2014-07-07	NOTEST	0	0	0	0	1	1	no
Glyma01g33510	Glyma01g33510	Glyma01g33510	Gm01:45669204-45672362	14-7-0	2014-07-07	NOTEST	0	0	0	0	1	1	no
Glyma01g33520	Glyma01g33520	Glyma01g33520	Gm01:45685075-45692774	14-7-0	2014-07-07	OK	10.2278	6.53557	-0.646109	0.947324	0.343474	0.731546	no
Glyma01g33560	Glyma01g33560	Glyma01g33560	Gm01:45743456-45744317	14-7-0	2014-07-07	NOTEST	0	0	0	0	1	1	no
Glyma01g33575	Glyma01g33575	Glyma01g33575	Gm01:45782142-45782607	14-7-0	2014-07-07	NOTEST	0	0	0	0	1	1	no
Glyma01g33590	Glyma01g33590	Glyma01g33590	Gm01:45785878-45786501	14-7-0	2014-07-07	NOTEST	0	0	0	0	1	1	no
Glyma01g33600	Glyma01g33600	Glyma01g33600	Gm01:45786844-45790318	14-7-0	2014-07-07	OK	3.61979	5.34373	0.56194	-0.753182	0.451341	0.806343	no
Glyma01g33610	Glyma01g33610	Glyma01g33610	Gm01:45796676-45800002	14-7-0	2014-07-07	OK	3.99688	8.03397	1.00724	-1.58835	0.112207	0.43278	no
Glyma01g33620	Glyma01g33620	Glyma01g33620	Gm01:45803536-45806513	14-7-0	2014-07-07	OK	1.25074	0.909734	-0.459262	0.50852	0.611089	0.894127	no
Glyma01g33635	Glyma01g33635	Glyma01g33635	Gm01:45827324-45830713	14-7-0	2014-07-07	NOTEST	0	0	0	0	1	1	no
Glyma01g33650	Glyma01g33650	Glyma01g33650	Gm01:45852397-45854700	14-7-0	2014-07-07	OK	1.89267	3.28165	0.793997	-1.169	0.242403	0.627625	no
Glyma01g33660	Glyma01g33660	Glyma01g33660	Gm01:45858147-45867014	14-7-0	2014-07-07	OK	9.24681	11.0617	0.258542	-0.437199	0.661967	0.91254	no
Glyma01g33676	Glyma01g33676	Glyma01g33676	Gm01:45892351-45898318	14-7-0	2014-07-07	OK	1.50999	1.08471	-0.477231	0.622232	0.533789	0.85584	no
Glyma01g33692	Glyma01g33692	Glyma01g33692	Gm01:45905544-45906417	14-7-0	2014-07-07	NOTEST	0	0	0	0	1	1	no
Glyma01g33708	Glyma01g33708	Glyma01g33708	Gm01:45911622-45912362	14-7-0	2014-07-07	NOTEST	0	0	0	0	1	1	no
Glyma01g33724	Glyma01g33724	Glyma01g33724	Gm01:45932771-45933893	14-7-0	2014-07-07	OK	2.26336	3.70125	0.709543	-0.93802	0.348234	0.736193	no
Glyma01g33740	Glyma01g33740	Glyma01g33740	Gm01:45948913-45964890	14-7-0	2014-07-07	NOTEST	0	0	0	0	1	1	no
Glyma01g33761	Glyma01g33761	Glyma01g33761	Gm01:45948913-45964890	14-7-0	2014-07-07	OK	2.2852	3.19713	0.484456	-0.643672	0.519788	0.847985	no
Glyma01g33782	Glyma01g33782	Glyma01g33782	Gm01:45948913-45964890	14-7-0	2014-07-07	NOTEST	0	0.200477	1.79769e+308	1.79769e+308	0.29218	1	no
Glyma01g33803	Glyma01g33803	Glyma01g33803	Gm01:45990835-45994797	14-7-0	2014-07-07	NOTEST	0	0	0	0	1	1	no
Glyma01g33824	Glyma01g33824	Glyma01g33824	Gm01:46002247-46005198	14-7-0	2014-07-07	NOTEST	0	0	0	0	1	1	no
Glyma01g33845	Glyma01g33845	Glyma01g33845	Gm01:46007636-46011913	14-7-0	2014-07-07	NOTEST	0	0	0	0	1	1	no
Glyma01g33866	Glyma01g33866	Glyma01g33866	Gm01:46043835-46074615	14-7-0	2014-07-07	OK	5.12285	4.08004	-0.328364	0.53087	0.595509	0.887144	no
Glyma01g33888	Glyma01g33888	Glyma01g33888	Gm01:46096266-46097858	14-7-0	2014-07-07	NOTEST	0	0	0	0	1	1	no
Glyma01g33910	Glyma01g33910	Glyma01g33910	Gm01:46103382-46104985	14-7-0	2014-07-07	NOTEST	0.31169	0.324291	0.057177	-0.0492011	0.960759	1	no
Glyma01g33920	Glyma01g33920	Glyma01g33920	Gm01:46115248-46117119	14-7-0	2014-07-07	NOTEST	0	0	0	0	1	1	no
Glyma01g33960	Glyma01g33960	Glyma01g33960	Gm01:46237540-46239330	14-7-0	2014-07-07	NOTEST	0	0	0	0	1	1	no
Glyma01g33986	Glyma01g33986	Glyma01g33986	Gm01:46305207-46307924	14-7-0	2014-07-07	NOTEST	0	0	0	0	1	1	no
Glyma01g34013	Glyma01g34013	Glyma01g34013	Gm01:46321601-46322033	14-7-0	2014-07-07	NOTEST	0	0	0	0	1	1	no
Glyma01g34040	Glyma01g34040	Glyma01g34040	Gm01:46325425-46325842	14-7-0	2014-07-07	NOTEST	0	0	0	0	1	1	no
Glyma01g34060	Glyma01g34060	Glyma01g34060	Gm01:46360579-46360996	14-7-0	2014-07-07	NOTEST	0	0	0	0	1	1	no
Glyma01g34111	Glyma01g34111	Glyma01g34111	Gm01:46405622-46406054	14-7-0	2014-07-07	NOTEST	0	0	0	0	1	1	no
Glyma01g34160	Glyma01g34160	Glyma01g34160	Gm01:46426795-46427518	14-7-0	2014-07-07	NOTEST	0	0	0	0	1	1	no
Glyma01g34180	Glyma01g34180	Glyma01g34180	Gm01:46434724-46435093	14-7-0	2014-07-07	NOTEST	0	0	0	0	1	1	no
Glyma01g34210	Glyma01g34210	Glyma01g34210	Gm01:46467747-46468471	14-7-0	2014-07-07	NOTEST	0	0	0	0	1	1	no
Glyma01g34223	Glyma01g34223	Glyma01g34223	Gm01:46519589-46520799	14-7-0	2014-07-07	NOTEST	0	0	0	0	1	1	no
Glyma01g34236	Glyma01g34236	Glyma01g34236	Gm01:46527137-46531737	14-7-0	2014-07-07	NOTEST	0.519842	0.372775	-0.479767	0.426865	0.669477	1	no
Glyma01g34250	Glyma01g34250	Glyma01g34250	Gm01:46534521-46534953	14-7-0	2014-07-07	NOTEST	0	0	0	0	1	1	no
Glyma01g34260	Glyma01g34260	Glyma01g34260	Gm01:46537220-46537655	14-7-0	2014-07-07	NOTEST	0	0	0	0	1	1	no
Glyma01g34270	Glyma01g34270	Glyma01g34270	Gm01:46573515-46583536	14-7-0	2014-07-07	OK	5.33345	4.23188	-0.333769	0.505923	0.612911	0.895111	no
Glyma01g34300	Glyma01g34300	Glyma01g34300	Gm01:46676161-46677711	14-7-0	2014-07-07	OK	672.25	64.3815	-3.38428	4.3786	1.19443e-05	0.000819243	yes
Glyma01g34321	Glyma01g34321	Glyma01g34321	Gm01:46693841-46694273	14-7-0	2014-07-07	NOTEST	0	0	0	0	1	1	no
Glyma01g34340	Glyma01g34340	Glyma01g34340	Gm01:46707889-46726051	14-7-0	2014-07-07	NOTEST	0	0	0	0	1	1	no
Glyma01g34350	Glyma01g34350	Glyma01g34350	Gm01:46731685-46740931	14-7-0	2014-07-07	OK	4.39298	2.11768	-1.05271	1.66909	0.0950986	0.397171	no
Glyma01g34360	Glyma01g34360	Glyma01g34360	Gm01:46742637-46747004	14-7-0	2014-07-07	NOTEST	0	0	0	0	1	1	no
Glyma01g34370	Glyma01g34370	Glyma01g34370	Gm01:46749398-46751642	14-7-0	2014-07-07	NOTEST	0.138086	0.35026	1.34286	-0.820397	0.41199	1	no
Glyma01g34380	Glyma01g34380	Glyma01g34380	Gm01:46754477-46758976	14-7-0	2014-07-07	OK	2.31225	3.81421	0.72209	-0.916128	0.3596	0.745283	no
Glyma01g34400	Glyma01g34400	Glyma01g34400	Gm01:46763231-46763483	14-7-0	2014-07-07	OK	16.6877	2.32918	-2.84089	1.64734	0.0994881	0.405667	no
Glyma01g34410	Glyma01g34410	Glyma01g34410	Gm01:46764767-46772182	14-7-0	2014-07-07	OK	1.39269	3.58192	1.36286	-1.74	0.0818589	0.365155	no
Glyma01g34420	Glyma01g34420	Glyma01g34420	Gm01:46787052-46789561	14-7-0	2014-07-07	NOTEST	0	0	0	0	1	1	no
Glyma01g34443	Glyma01g34443	Glyma01g34443	Gm01:46808690-46811728	14-7-0	2014-07-07	NOTEST	0	0	0	0	1	1	no
Glyma01g34466	Glyma01g34466	Glyma01g34466	Gm01:46825911-46827713	14-7-0	2014-07-07	NOTEST	0	0	0	0	1	1	no
Glyma01g34490	Glyma01g34490	Glyma01g34490	Gm01:46835873-46838757	14-7-0	2014-07-07	NOTEST	0	0	0	0	1	1	no
Glyma01g34506	Glyma01g34506	Glyma01g34506	Gm01:46869789-46881811	14-7-0	2014-07-07	OK	1.07782	2.06448	0.937663	-1.2524	0.210425	0.589235	no
Glyma01g34523	Glyma01g34523	Glyma01g34523	Gm01:46869789-46881811	14-7-0	2014-07-07	NOTEST	0	0	0	0	1	1	no
Glyma01g34540	Glyma01g34540	Glyma01g34540	Gm01:46906412-46911701	14-7-0	2014-07-07	NOTEST	0	0.0831269	1.79769e+308	1.79769e+308	0.0980491	1	no
Glyma01g34560	Glyma01g34560	Glyma01g34560	Gm01:46925228-46938022	14-7-0	2014-07-07	OK	0.91926	1.81818	0.983953	-1.25991	0.2077	0.586181	no
Glyma01g34570	Glyma01g34570	Glyma01g34570	Gm01:46940993-46942519	14-7-0	2014-07-07	NOTEST	0.0566339	0.197698	1.80356	-1.12869	0.259031	1	no
Glyma01g34580	Glyma01g34580	Glyma01g34580	Gm01:46987337-46989392	14-7-0	2014-07-07	NOTEST	0	0	0	0	1	1	no
Glyma01g34590	Glyma01g34590	Glyma01g34590	Gm01:46994947-47011742	14-7-0	2014-07-07	NOTEST	0.0203722	0.130849	2.68323	-1.72917	0.0837792	1	no
Glyma01g34605	Glyma01g34605	Glyma01g34605	Gm01:47017352-47017572	14-7-0	2014-07-07	NOTEST	0	0	0	0	1	1	no
Glyma01g34620	Glyma01g34620	Glyma01g34620	Gm01:47044532-47046263	14-7-0	2014-07-07	NOTEST	0	0.405178	1.79769e+308	1.79769e+308	0.0416395	1	no
Glyma01g34630	Glyma01g34630	Glyma01g34630	Gm01:47059946-47069275	14-7-0	2014-07-07	OK	5.30446	8.4361	0.669372	-0.998808	0.317888	0.709428	no
Glyma01g34650	Glyma01g34650	Glyma01g34650	Gm01:47081810-47085604	14-7-0	2014-07-07	NOTEST	0.0562514	0.188237	1.74259	-0.853973	0.39312	1	no
Glyma01g34660	Glyma01g34660	Glyma01g34660	Gm01:47090148-47094163	14-7-0	2014-07-07	OK	14.1577	14.7778	0.0618434	-0.098474	0.921556	0.982576	no
Glyma01g34671	Glyma01g34671	Glyma01g34671	Gm01:47112164-47117514	14-7-0	2014-07-07	NOTEST	0	0	0	0	1	1	no
Glyma01g34680	Glyma01g34680	Glyma01g34680	Gm01:47129774-47133165	14-7-0	2014-07-07	OK	2.01404	1.65563	-0.282712	0.370602	0.710934	0.927788	no
Glyma01g34690	Glyma01g34690	Glyma01g34690	Gm01:47136977-47141477	14-7-0	2014-07-07	OK	8.90881	5.85704	-0.60506	0.784905	0.432509	0.796606	no
Glyma01g34700	Glyma01g34700	Glyma01g34700	Gm01:47141945-47148729	14-7-0	2014-07-07	OK	114.077	88.4162	-0.367628	0.457238	0.6475	0.907589	no
Glyma01g34710	Glyma01g34710	Glyma01g34710	Gm01:47159471-47160816	14-7-0	2014-07-07	NOTEST	0	0	0	0	1	1	no
Glyma01g34723	Glyma01g34723	Glyma01g34723	Gm01:47186498-47195065	14-7-0	2014-07-07	NOTEST	0	0	0	0	1	1	no
Glyma01g34736	Glyma01g34736	Glyma01g34736	Gm01:47186498-47195065	14-7-0	2014-07-07	NOTEST	0.0657681	0.0265674	-1.30773	0.33792	0.735423	1	no
Glyma01g34750	Glyma01g34750	Glyma01g34750	Gm01:47186498-47195065	14-7-0	2014-07-07	NOTEST	0	0	0	0	1	1	no
Glyma01g34760	Glyma01g34760	Glyma01g34760	Gm01:47218316-47222203	14-7-0	2014-07-07	NOTEST	0	0	0	0	1	1	no
Glyma01g34770	Glyma01g34770	Glyma01g34770	Gm01:47223841-47226695	14-7-0	2014-07-07	NOTEST	0	0	0	0	1	1	no
Glyma01g34780	Glyma01g34780	Glyma01g34780	Gm01:47252139-47259720	14-7-0	2014-07-07	OK	7.62894	6.93268	-0.138071	0.204854	0.837686	0.961968	no
Glyma01g34791	Glyma01g34791	Glyma01g34791	Gm01:47272202-47272649	14-7-0	2014-07-07	NOTEST	0	0	0	0	1	1	no
Glyma01g34800	Glyma01g34800	Glyma01g34800	Gm01:47276056-47279637	14-7-0	2014-07-07	NOTEST	0	0.0465843	1.79769e+308	1.79769e+308	0.180329	1	no
Glyma01g34820	Glyma01g34820	Glyma01g34820	Gm01:47295116-47298579	14-7-0	2014-07-07	OK	5.51435	8.99133	0.705343	-1.18478	0.236104	0.620602	no
Glyma01g34830	Glyma01g34830	Glyma01g34830	Gm01:47301280-47303164	14-7-0	2014-07-07	NOTEST	0.0823379	0.125138	0.60389	-0.459595	0.645807	1	no
Glyma01g34840	Glyma01g34840	Glyma01g34840	Gm01:47306519-47315257	14-7-0	2014-07-07	OK	3.27052	3.29187	0.0093867	-0.0156412	0.987521	0.997182	no
Glyma01g34890	Glyma01g34890	Glyma01g34890	Gm01:47380345-47383987	14-7-0	2014-07-07	NOTEST	0	0	0	0	1	1	no
Glyma01g34930	Glyma01g34930	Glyma01g34930	Gm01:47416768-47417287	14-7-0	2014-07-07	OK	0.207686	3.69946	4.15484	-2.79386	0.00520823	0.0690057	no
Glyma01g34940	Glyma01g34940	Glyma01g34940	Gm01:47418176-47422790	14-7-0	2014-07-07	OK	4.83063	2.9479	-0.712523	0.960607	0.33675	0.725995	no
Glyma01g34950	Glyma01g34950	Glyma01g34950	Gm01:47484620-47488243	14-7-0	2014-07-07	NOTEST	0	0	0	0	1	1	no
Glyma01g34960	Glyma01g34960	Glyma01g34960	Gm01:47484620-47488243	14-7-0	2014-07-07	NOTEST	0.482442	0.41496	-0.217385	0.220222	0.825698	1	no
Glyma01g34971	Glyma01g34971	Glyma01g34971	Gm01:47509796-47513893	14-7-0	2014-07-07	NOTEST	0	0	0	0	1	1	no
Glyma01g34980	Glyma01g34980	Glyma01g34980	Gm01:47515002-47518685	14-7-0	2014-07-07	OK	1.65695	2.24915	0.440852	-0.635999	0.524777	0.850558	no
Glyma01g34990	Glyma01g34990	Glyma01g34990	Gm01:47519487-47522901	14-7-0	2014-07-07	OK	0.665383	0.890472	0.420385	-0.466767	0.640666	0.905462	no
Glyma01g35010	Glyma01g35010	Glyma01g35010	Gm01:47557393-47559050	14-7-0	2014-07-07	OK	1.49789	0.338263	-2.14671	2.17936	0.029305	0.203727	no
Glyma01g35030	Glyma01g35030	Glyma01g35030	Gm01:47605850-47609703	14-7-0	2014-07-07	OK	21.4939	16.5628	-0.375982	0.632894	0.526803	0.852047	no
Glyma01g35043	Glyma01g35043	Glyma01g35043	Gm01:47610784-47630469	14-7-0	2014-07-07	OK	3.50693	2.47136	-0.5049	0.673996	0.500314	0.836558	no
Glyma01g35056	Glyma01g35056	Glyma01g35056	Gm01:47635648-47638176	14-7-0	2014-07-07	NOTEST	0.0199914	0.141432	2.82265	-1.35558	0.175233	1	no
Glyma01g35070	Glyma01g35070	Glyma01g35070	Gm01:47640057-47641838	14-7-0	2014-07-07	NOTEST	0	0	0	0	1	1	no
Glyma01g35083	Glyma01g35083	Glyma01g35083	Gm01:47647068-47659579	14-7-0	2014-07-07	OK	6.5767	4.83697	-0.443259	0.728438	0.466346	0.816347	no
Glyma01g35096	Glyma01g35096	Glyma01g35096	Gm01:47647068-47659579	14-7-0	2014-07-07	NOTEST	0.117723	0.224888	0.933807	-0.252379	0.800748	1	no
Glyma01g35110	Glyma01g35110	Glyma01g35110	Gm01:47674344-47678727	14-7-0	2014-07-07	OK	1.73116	2.52803	0.546272	-0.679232	0.496991	0.834718	no
Glyma01g35120	Glyma01g35120	Glyma01g35120	Gm01:47680344-47682544	14-7-0	2014-07-07	NOTEST	0	0	0	0	1	1	no
Glyma01g35130	Glyma01g35130	Glyma01g35130	Gm01:47684337-47693236	14-7-0	2014-07-07	OK	11.6721	15.4387	0.403484	-0.66941	0.503234	0.838166	no
Glyma01g35145	Glyma01g35145	Glyma01g35145	Gm01:47696213-47700220	14-7-0	2014-07-07	OK	4.49606	1.10906	-2.01932	2.60822	0.00910146	0.0998617	no
Glyma01g35160	Glyma01g35160	Glyma01g35160	Gm01:47703725-47705225	14-7-0	2014-07-07	OK	1.55797	1.59971	0.0381398	-0.044267	0.964692	0.993452	no
Glyma01g35170	Glyma01g35170	Glyma01g35170	Gm01:47707392-47708756	14-7-0	2014-07-07	OK	6.27413	13.1306	1.06544	-1.66575	0.0957637	0.398684	no
Glyma01g35180	Glyma01g35180	Glyma01g35180	Gm01:47718336-47725678	14-7-0	2014-07-07	NOTEST	0.0714484	0.311812	2.1257	-1.62858	0.103402	1	no
Glyma01g35190	Glyma01g35190	Glyma01g35190	Gm01:47727548-47732948	14-7-0	2014-07-07	OK	35.9894	18.1738	-0.985714	1.6035	0.108825	0.425964	no
Glyma01g35201	Glyma01g35201	Glyma01g35201	Gm01:47733363-47734311	14-7-0	2014-07-07	OK	1.57045	0.81607	-0.944415	0.51128	0.609155	0.893258	no
Glyma01g35211	Glyma01g35211	Glyma01g35211	Gm01:47738908-47740460	14-7-0	2014-07-07	NOTEST	0	0	0	0	1	1	no
Glyma01g35220	Glyma01g35220	Glyma01g35220	Gm01:47744055-47749293	14-7-0	2014-07-07	OK	31.2975	50.6191	0.693635	-0.922928	0.356045	0.743002	no
Glyma01g35230	Glyma01g35230	Glyma01g35230	Gm01:47776150-47780905	14-7-0	2014-07-07	OK	6.72701	9.27777	0.463813	-0.745908	0.455723	0.809208	no
Glyma01g35255	Glyma01g35255	Glyma01g35255	Gm01:47796276-47802389	14-7-0	2014-07-07	NOTEST	0	0.0904006	1.79769e+308	1.79769e+308	0.0539625	1	no
Glyma01g35280	Glyma01g35280	Glyma01g35280	Gm01:47816224-47821828	14-7-0	2014-07-07	OK	28.8934	48.6767	0.752492	-1.24495	0.213149	0.593214	no
Glyma01g35291	Glyma01g35291	Glyma01g35291	Gm01:47825541-47831516	14-7-0	2014-07-07	OK	1.91455	0.802629	-1.2542	1.47086	0.14133	0.48922	no
Glyma01g35300	Glyma01g35300	Glyma01g35300	Gm01:47832148-47834125	14-7-0	2014-07-07	OK	3.54178	4.53437	0.356427	-0.508344	0.611212	0.894172	no
Glyma01g35310	Glyma01g35310	Glyma01g35310	Gm01:47838176-47839418	14-7-0	2014-07-07	NOTEST	0.077372	0.095188	0.298968	-0.171815	0.863583	1	no
Glyma01g35315	Glyma01g35315	Glyma01g35315	Gm01:47840273-47842107	14-7-0	2014-07-07	NOTEST	0	0	0	0	1	1	no
Glyma01g35320	Glyma01g35320	Glyma01g35320	Gm01:47843480-47846444	14-7-0	2014-07-07	OK	8.41964	11.2219	0.414483	-0.699247	0.484398	0.827086	no
Glyma01g35330	Glyma01g35330	Glyma01g35330	Gm01:47852135-47854503	14-7-0	2014-07-07	OK	5.16829	5.134	-0.00960572	0.0154154	0.987701	0.997191	no
Glyma01g35360	Glyma01g35360	Glyma01g35360	Gm01:47868564-47871498	14-7-0	2014-07-07	OK	22.1531	16.0801	-0.46223	0.779508	0.43568	0.798676	no
Glyma01g35370	Glyma01g35370	Glyma01g35370	Gm01:47876579-47879048	14-7-0	2014-07-07	OK	3.20059	2.05865	-0.636637	0.899352	0.368465	0.750499	no
Glyma01g35381	Glyma01g35381	Glyma01g35381	Gm01:47882778-47885490	14-7-0	2014-07-07	OK	11.4681	9.34653	-0.29513	0.429425	0.667614	0.913971	no
Glyma01g35390	Glyma01g35390	Glyma01g35390	Gm01:47891482-47901268	14-7-0	2014-07-07	OK	10.0184	13.6909	0.450568	-0.758101	0.44839	0.80503	no
Glyma01g35400	Glyma01g35400	Glyma01g35400	Gm01:47904409-47909019	14-7-0	2014-07-07	OK	1.02993	1.30268	0.338944	-0.396067	0.692056	0.92106	no
Glyma01g35410	Glyma01g35410	Glyma01g35410	Gm01:47910023-47911708	14-7-0	2014-07-07	NOTEST	0	0.106505	1.79769e+308	1.79769e+308	0.0638309	1	no
Glyma01g35420	Glyma01g35420	Glyma01g35420	Gm01:47912898-47913228	14-7-0	2014-07-07	NOTEST	0	0	0	0	1	1	no
Glyma01g35430	Glyma01g35430	Glyma01g35430	Gm01:47926149-47931104	14-7-0	2014-07-07	NOTEST	0.137918	0.0986174	-0.483901	0.372417	0.709583	1	no
Glyma01g35440	Glyma01g35440	Glyma01g35440	Gm01:47932186-47933647	14-7-0	2014-07-07	NOTEST	0	0.179016	1.79769e+308	1.79769e+308	0.0539625	1	no
Glyma01g35450	Glyma01g35450	Glyma01g35450	Gm01:47933912-47939040	14-7-0	2014-07-07	OK	18.6098	9.13725	-1.02623	1.72245	0.0849889	0.373556	no
Glyma01g35460	Glyma01g35460	Glyma01g35460	Gm01:47946562-47947368	14-7-0	2014-07-07	OK	3.11165	17.1495	2.46241	-3.25191	0.00114632	0.0246806	yes
Glyma01g35470	Glyma01g35470	Glyma01g35470	Gm01:47950106-47953985	14-7-0	2014-07-07	OK	0.889054	0.520908	-0.771242	0.727646	0.466831	0.816702	no
Glyma01g35480	Glyma01g35480	Glyma01g35480	Gm01:47964085-47972060	14-7-0	2014-07-07	OK	2.5543	3.52437	0.464438	-0.534642	0.592897	0.886404	no
Glyma01g35490	Glyma01g35490	Glyma01g35490	Gm01:47975124-47980649	14-7-0	2014-07-07	OK	3.02624	2.67191	-0.179653	0.279209	0.780085	0.947528	no
Glyma01g35500	Glyma01g35500	Glyma01g35500	Gm01:47984869-47990016	14-7-0	2014-07-07	NOTEST	0.400321	0.576422	0.525966	-0.541184	0.588381	1	no
Glyma01g35510	Glyma01g35510	Glyma01g35510	Gm01:47990548-47991258	14-7-0	2014-07-07	OK	2.56944	0.893014	-1.5247	1.4275	0.153435	0.510154	no
Glyma01g35530	Glyma01g35530	Glyma01g35530	Gm01:48002890-48006714	14-7-0	2014-07-07	NOTEST	0.143326	0.181491	0.340597	-0.275078	0.783256	1	no
Glyma01g35540	Glyma01g35540	Glyma01g35540	Gm01:48012025-48020478	14-7-0	2014-07-07	OK	0.918538	2.82586	1.62128	-2.07311	0.0381619	0.23447	no
Glyma01g35551	Glyma01g35551	Glyma01g35551	Gm01:48045791-48046532	14-7-0	2014-07-07	NOTEST	0	0.144412	1.79769e+308	1.79769e+308	0.180329	1	no
Glyma01g35561	Glyma01g35561	Glyma01g35561	Gm01:48046627-48048949	14-7-0	2014-07-07	NOTEST	0	0.032539	1.79769e+308	1.79769e+308	0.180329	1	no
Glyma01g35570	Glyma01g35570	Glyma01g35570	Gm01:48069521-48070621	14-7-0	2014-07-07	OK	1.38462	0.641213	-1.11061	1.05219	0.292713	0.686607	no
Glyma01g35580	Glyma01g35580	Glyma01g35580	Gm01:48077865-48083725	14-7-0	2014-07-07	OK	1.58574	0.803477	-0.980824	1.12517	0.260519	0.650301	no
Glyma01g35590	Glyma01g35590	Glyma01g35590	Gm01:48086193-48086883	14-7-0	2014-07-07	OK	0	0.92946	1.79769e+308	1.79769e+308	0.031252	0.211001	no
Glyma01g35600	Glyma01g35600	Glyma01g35600	Gm01:48088646-48092573	14-7-0	2014-07-07	OK	2.37141	3.58935	0.59798	-0.770357	0.441088	0.801145	no
Glyma01g35611	Glyma01g35611	Glyma01g35611	Gm01:48106435-48107149	14-7-0	2014-07-07	NOTEST	0	0	0	0	1	1	no
Glyma01g35620	Glyma01g35620	Glyma01g35620	Gm01:48132072-48139955	14-7-0	2014-07-07	OK	22.8855	41.2311	0.8493	-1.3265	0.184675	0.553573	no
Glyma01g35630	Glyma01g35630	Glyma01g35630	Gm01:48142117-48144321	14-7-0	2014-07-07	OK	0.059907	0.887743	3.88934	-2.59578	0.00943772	0.102358	no
Glyma01g35640	Glyma01g35640	Glyma01g35640	Gm01:48145384-48152470	14-7-0	2014-07-07	OK	1.27053	0.823448	-0.625678	0.751256	0.452498	0.807094	no
Glyma01g35650	Glyma01g35650	Glyma01g35650	Gm01:48157272-48165868	14-7-0	2014-07-07	OK	4.98246	3.39019	-0.555492	0.923008	0.356003	0.743002	no
Glyma01g35660	Glyma01g35660	Glyma01g35660	Gm01:48174704-48177832	14-7-0	2014-07-07	OK	0.812634	0.617846	-0.395359	0.434973	0.663582	0.913265	no
Glyma01g35671	Glyma01g35671	Glyma01g35671	Gm01:48220843-48221643	14-7-0	2014-07-07	OK	66.9649	25.0829	-1.4167	2.32066	0.0203051	0.163539	no
Glyma01g35681	Glyma01g35681	Glyma01g35681	Gm01:48221730-48222524	14-7-0	2014-07-07	NOTEST	0.17431	0	-1.79769e+308	-1.79769e+308	0.139932	1	no
Glyma01g35690	Glyma01g35690	Glyma01g35690	Gm01:48227988-48235632	14-7-0	2014-07-07	OK	0.422589	1.24589	1.55985	-1.75265	0.0796616	0.359592	no
Glyma01g35700	Glyma01g35700	Glyma01g35700	Gm01:48235761-48238962	14-7-0	2014-07-07	NOTEST	0.121729	0.096652	-0.332798	0.281438	0.778375	1	no
Glyma01g35711	Glyma01g35711	Glyma01g35711	Gm01:48242478-48244212	14-7-0	2014-07-07	NOTEST	0	0	0	0	1	1	no
Glyma01g35720	Glyma01g35720	Glyma01g35720	Gm01:48246126-48248948	14-7-0	2014-07-07	NOTEST	0	0	0	0	1	1	no
Glyma01g35730	Glyma01g35730	Glyma01g35730	Gm01:48251598-48253821	14-7-0	2014-07-07	OK	1.1284	0.326999	-1.78693	1.63904	0.101206	0.409187	no
Glyma01g35740	Glyma01g35740	Glyma01g35740	Gm01:48256233-48258418	14-7-0	2014-07-07	OK	1.42848	1.17094	-0.286807	0.305491	0.759992	0.941673	no
Glyma01g35750	Glyma01g35750	Glyma01g35750	Gm01:48262136-48265375	14-7-0	2014-07-07	OK	9.39795	6.77497	-0.472131	0.773907	0.438986	0.8	no
Glyma01g35780	Glyma01g35780	Glyma01g35780	Gm01:48276784-48278711	14-7-0	2014-07-07	OK	13.9407	11.57	-0.268908	0.394884	0.692928	0.92115	no
Glyma01g35790	Glyma01g35790	Glyma01g35790	Gm01:48279936-48284217	14-7-0	2014-07-07	OK	5.28474	3.4204	-0.627669	1.02076	0.307367	0.700323	no
Glyma01g35800	Glyma01g35800	Glyma01g35800	Gm01:48289113-48292398	14-7-0	2014-07-07	OK	0.15621	1.2341	2.98191	-3.05028	0.00228628	0.039759	yes
Glyma01g35820	Glyma01g35820	Glyma01g35820	Gm01:48321786-48329293	14-7-0	2014-07-07	OK	1.37045	1.04645	-0.389147	0.503727	0.614453	0.896048	no
Glyma01g35830	Glyma01g35830	Glyma01g35830	Gm01:48330613-48331119	14-7-0	2014-07-07	NOTEST	0	0	0	0	1	1	no
Glyma01g35840	Glyma01g35840	Glyma01g35840	Gm01:48332060-48333217	14-7-0	2014-07-07	OK	3.07125	2.42829	-0.338885	0.406828	0.684135	0.919568	no
Glyma01g35850	Glyma01g35850	Glyma01g35850	Gm01:48334976-48338851	14-7-0	2014-07-07	OK	3.10658	3.2379	0.0597317	-0.0950314	0.92429	0.983182	no
Glyma01g35880	Glyma01g35880	Glyma01g35880	Gm01:48348796-48349428	14-7-0	2014-07-07	NOTEST	0	0	0	0	1	1	no
Glyma01g35910	Glyma01g35910	Glyma01g35910	Gm01:48361827-48364787	14-7-0	2014-07-07	OK	123.395	206.399	0.74215	-0.961799	0.336151	0.725203	no
Glyma01g35920	Glyma01g35920	Glyma01g35920	Gm01:48373909-48375181	14-7-0	2014-07-07	OK	2.80129	3.61031	0.366034	-0.484947	0.627714	0.900355	no
Glyma01g35931	Glyma01g35931	Glyma01g35931	Gm01:48376295-48378301	14-7-0	2014-07-07	NOTEST	0	0	0	0	1	1	no
Glyma01g35940	Glyma01g35940	Glyma01g35940	Gm01:48378830-48383355	14-7-0	2014-07-07	OK	1.2579	2.03311	0.692669	-0.935455	0.349554	0.737429	no
Glyma01g35950	Glyma01g35950	Glyma01g35950	Gm01:48392038-48401536	14-7-0	2014-07-07	OK	1.55586	2.44726	0.653456	-1.02941	0.303285	0.697055	no
Glyma01g35960	Glyma01g35960	Glyma01g35960	Gm01:48412616-48415065	14-7-0	2014-07-07	NOTEST	0	0	0	0	1	1	no
Glyma01g35970	Glyma01g35970	Glyma01g35970	Gm01:48419129-48422033	14-7-0	2014-07-07	NOTEST	0	0	0	0	1	1	no
Glyma01g35980	Glyma01g35980	Glyma01g35980	Gm01:48422961-48427391	14-7-0	2014-07-07	OK	0.870405	1.32942	0.611043	-0.768737	0.442049	0.801466	no
Glyma01g35990	Glyma01g35990	Glyma01g35990	Gm01:48439916-48441659	14-7-0	2014-07-07	OK	2.30887	3.21582	0.478002	-0.612718	0.540063	0.859112	no
Glyma01g36000	Glyma01g36000	Glyma01g36000	Gm01:48442886-48447854	14-7-0	2014-07-07	OK	0.25655	2.74178	3.4178	-4.01832	5.86152e-05	0.00276624	yes
Glyma01g36011	Glyma01g36011	Glyma01g36011	Gm01:48469240-48475758	14-7-0	2014-07-07	OK	2.26787	1.84234	-0.299796	0.384977	0.700255	0.923772	no
Glyma01g36021	Glyma01g36021	Glyma01g36021	Gm01:48476497-48478317	14-7-0	2014-07-07	NOTEST	0	0	0	0	1	1	no
Glyma01g36030	Glyma01g36030	Glyma01g36030	Gm01:48481465-48486456	14-7-0	2014-07-07	OK	4.49093	3.95465	-0.183462	0.258206	0.796248	0.951601	no
Glyma01g36040	Glyma01g36040	Glyma01g36040	Gm01:48503695-48509106	14-7-0	2014-07-07	OK	1.13244	2.5064	1.14619	-1.55245	0.120555	0.451266	no
Glyma01g36050	Glyma01g36050	Glyma01g36050	Gm01:48515192-48516090	14-7-0	2014-07-07	NOTEST	0.113042	0.157829	0.481502	-0.276716	0.781999	1	no
Glyma01g36070	Glyma01g36070	Glyma01g36070	Gm01:48524087-48529043	14-7-0	2014-07-07	OK	6.76741	7.44216	0.137117	-0.227671	0.819902	0.958126	no
Glyma01g36080	Glyma01g36080	Glyma01g36080	Gm01:48537766-48542585	14-7-0	2014-07-07	OK	1.40474	1.25905	-0.157968	0.200166	0.841351	0.962965	no
Glyma01g36091	Glyma01g36091	Glyma01g36091	Gm01:48559460-48570512	14-7-0	2014-07-07	OK	0.502169	0.88271	0.813766	-0.840559	0.400595	0.775186	no
Glyma01g36101	Glyma01g36101	Glyma01g36101	Gm01:48579414-48580534	14-7-0	2014-07-07	NOTEST	0	0	0	0	1	1	no
Glyma01g36110	Glyma01g36110	Glyma01g36110	Gm01:48584816-48588333	14-7-0	2014-07-07	OK	5.24374	10.9185	1.0581	-1.7783	0.0753539	0.347296	no
Glyma01g36120	Glyma01g36120	Glyma01g36120	Gm01:48599418-48603933	14-7-0	2014-07-07	OK	3.2243	2.05166	-0.652195	0.85699	0.39145	0.76809	no
Glyma01g36130	Glyma01g36130	Glyma01g36130	Gm01:48622283-48624709	14-7-0	2014-07-07	NOTEST	0	0	0	0	1	1	no
Glyma01g36145	Glyma01g36145	Glyma01g36145	Gm01:48632045-48636339	14-7-0	2014-07-07	OK	0.539881	1.52521	1.49829	-1.67289	0.0943498	0.395586	no
Glyma01g36160	Glyma01g36160	Glyma01g36160	Gm01:48651554-48653174	14-7-0	2014-07-07	OK	2.94112	14.3911	2.29074	-3.46723	0.000525846	0.0142168	yes
Glyma01g36170	Glyma01g36170	Glyma01g36170	Gm01:48661585-48668062	14-7-0	2014-07-07	OK	5.32387	3.60496	-0.562492	0.90129	0.367434	0.75016	no
Glyma01g36180	Glyma01g36180	Glyma01g36180	Gm01:48677503-48687090	14-7-0	2014-07-07	OK	1.83512	3.72876	1.02283	-1.22476	0.220665	0.603404	no
Glyma01g36190	Glyma01g36190	Glyma01g36190	Gm01:48690497-48697620	14-7-0	2014-07-07	NOTEST	0	0	0	0	1	1	no
Glyma01g36200	Glyma01g36200	Glyma01g36200	Gm01:48703010-48710116	14-7-0	2014-07-07	OK	5.29921	4.6046	-0.2027	0.339122	0.734518	0.933943	no
Glyma01g36210	Glyma01g36210	Glyma01g36210	Gm01:48710853-48716254	14-7-0	2014-07-07	OK	21.1912	11.4699	-0.885615	1.32429	0.185408	0.554847	no
Glyma01g36225	Glyma01g36225	Glyma01g36225	Gm01:48732011-48735191	14-7-0	2014-07-07	OK	1.1587	0.627252	-0.885388	0.991464	0.321459	0.712074	no
Glyma01g36240	Glyma01g36240	Glyma01g36240	Gm01:48735796-48738228	14-7-0	2014-07-07	NOTEST	0.507134	0.529311	0.0617486	-0.0663202	0.947123	1	no
Glyma01g36250	Glyma01g36250	Glyma01g36250	Gm01:48740116-48740919	14-7-0	2014-07-07	OK	1.77	0.790581	-1.16276	1.02967	0.303164	0.697055	no
Glyma01g36260	Glyma01g36260	Glyma01g36260	Gm01:48742924-48747330	14-7-0	2014-07-07	OK	0.773926	1.11234	0.523325	-0.620253	0.535091	0.856096	no
Glyma01g36270	Glyma01g36270	Glyma01g36270	Gm01:48751691-48754081	14-7-0	2014-07-07	OK	7.12544	4.27482	-0.737115	1.20329	0.228865	0.612177	no
Glyma01g36280	Glyma01g36280	Glyma01g36280	Gm01:48755468-48766262	14-7-0	2014-07-07	OK	1.80411	1.11492	-0.694348	1.01649	0.309396	0.702549	no
Glyma01g36290	Glyma01g36290	Glyma01g36290	Gm01:48768219-48769858	14-7-0	2014-07-07	OK	9.87429	3.42119	-1.52918	1.87927	0.0602076	0.306629	no
Glyma01g36301	Glyma01g36301	Glyma01g36301	Gm01:48784769-48791019	14-7-0	2014-07-07	OK	0.0192918	1.43543	6.21735	-3.37569	0.00073631	0.018002	yes
Glyma01g36311	Glyma01g36311	Glyma01g36311	Gm01:48803722-48809885	14-7-0	2014-07-07	NOTEST	0.0522998	0.0423323	-0.305047	0.147567	0.882685	1	no
Glyma01g36320	Glyma01g36320	Glyma01g36320	Gm01:48810062-48812413	14-7-0	2014-07-07	OK	2.29765	5.6327	1.29367	-1.35826	0.174381	0.542117	no
Glyma01g36330	Glyma01g36330	Glyma01g36330	Gm01:48812789-48816606	14-7-0	2014-07-07	NOTEST	0.0951115	0	-1.79769e+308	-1.79769e+308	0.139932	1	no
Glyma01g36340	Glyma01g36340	Glyma01g36340	Gm01:48817174-48822812	14-7-0	2014-07-07	OK	4.73964	4.07015	-0.219696	0.356935	0.721141	0.930361	no
Glyma01g36350	Glyma01g36350	Glyma01g36350	Gm01:48822940-48825606	14-7-0	2014-07-07	NOTEST	0.27379	0.53511	0.966762	-0.993444	0.320494	1	no
Glyma01g36360	Glyma01g36360	Glyma01g36360	Gm01:48830588-48836103	14-7-0	2014-07-07	NOTEST	0.138811	0.42605	1.6179	-1.40091	0.161242	1	no
Glyma01g36375	Glyma01g36375	Glyma01g36375	Gm01:48848060-48848643	14-7-0	2014-07-07	NOTEST	0	0	0	0	1	1	no
Glyma01g36390	Glyma01g36390	Glyma01g36390	Gm01:48865791-48875859	14-7-0	2014-07-07	OK	0.419265	1.71682	2.0338	-2.39322	0.016701	0.146673	no
Glyma01g36410	Glyma01g36410	Glyma01g36410	Gm01:48903092-48909719	14-7-0	2014-07-07	OK	10.7053	17.0351	0.670189	-1.1219	0.261907	0.652088	no
Glyma01g36420	Glyma01g36420	Glyma01g36420	Gm01:48925196-48933027	14-7-0	2014-07-07	OK	1.78928	1.48444	-0.269463	0.332142	0.739782	0.93554	no
Glyma01g36430	Glyma01g36430	Glyma01g36430	Gm01:48939588-48943055	14-7-0	2014-07-07	NOTEST	0.233051	0.289993	0.315372	-0.286109	0.774795	1	no
Glyma01g36440	Glyma01g36440	Glyma01g36440	Gm01:48945635-48947617	14-7-0	2014-07-07	OK	8.65622	12.355	0.513292	-0.865567	0.386728	0.765496	no
Glyma01g36450	Glyma01g36450	Glyma01g36450	Gm01:48961667-48971891	14-7-0	2014-07-07	OK	4.51485	3.43182	-0.395705	0.662689	0.507529	0.84069	no
Glyma01g36460	Glyma01g36460	Glyma01g36460	Gm01:48974134-48978029	14-7-0	2014-07-07	NOTEST	0	0	0	0	1	1	no
Glyma01g36480	Glyma01g36480	Glyma01g36480	Gm01:48987938-48990441	14-7-0	2014-07-07	OK	1.08655	12.9348	3.57342	-4.41104	1.02876e-05	0.000725074	yes
Glyma01g36490	Glyma01g36490	Glyma01g36490	Gm01:48994357-48995257	14-7-0	2014-07-07	NOTEST	0	0	0	0	1	1	no
Glyma01g36500	Glyma01g36500	Glyma01g36500	Gm01:48997060-49003679	14-7-0	2014-07-07	NOTEST	0.306597	0.291645	-0.0721302	0.072456	0.942239	1	no
Glyma01g36510	Glyma01g36510	Glyma01g36510	Gm01:49007099-49008173	14-7-0	2014-07-07	NOTEST	0.0914294	0	-1.79769e+308	-1.79769e+308	0.139932	1	no
Glyma01g36520	Glyma01g36520	Glyma01g36520	Gm01:49010426-49011305	14-7-0	2014-07-07	NOTEST	0	0	0	0	1	1	no
Glyma01g36530	Glyma01g36530	Glyma01g36530	Gm01:49013986-49014688	14-7-0	2014-07-07	NOTEST	0	0	0	0	1	1	no
Glyma01g36545	Glyma01g36545	Glyma01g36545	Gm01:49022248-49027494	14-7-0	2014-07-07	NOTEST	0	0	0	0	1	1	no
Glyma01g36560	Glyma01g36560	Glyma01g36560	Gm01:49029694-49030771	14-7-0	2014-07-07	NOTEST	0	0.060563	1.79769e+308	1.79769e+308	0.180329	1	no
Glyma01g36570	Glyma01g36570	Glyma01g36570	Gm01:49038832-49039771	14-7-0	2014-07-07	NOTEST	0	0.0681299	1.79769e+308	1.79769e+308	0.180329	1	no
Glyma01g36580	Glyma01g36580	Glyma01g36580	Gm01:49043808-49044992	14-7-0	2014-07-07	NOTEST	0	0	0	0	1	1	no
Glyma01g36590	Glyma01g36590	Glyma01g36590	Gm01:49051914-49056921	14-7-0	2014-07-07	OK	0.256649	0.602865	1.23204	-1.23929	0.215237	0.595951	no
Glyma01g36600	Glyma01g36600	Glyma01g36600	Gm01:49064175-49066310	14-7-0	2014-07-07	OK	2.63273	6.37327	1.27547	-1.75337	0.0795385	0.359227	no
Glyma01g36606	Glyma01g36606	Glyma01g36606	Gm01:49068914-49070036	14-7-0	2014-07-07	OK	0.94672	0.995163	0.0719952	-0.0754888	0.939826	0.987939	no
Glyma01g36613	Glyma01g36613	Glyma01g36613	Gm01:49070073-49072214	14-7-0	2014-07-07	OK	0.792903	0.646465	-0.294572	0.286541	0.774464	0.94608	no
Glyma01g36620	Glyma01g36620	Glyma01g36620	Gm01:49074667-49077300	14-7-0	2014-07-07	OK	174.89	155.892	-0.165898	0.246722	0.805123	0.953256	no
Glyma01g36630	Glyma01g36630	Glyma01g36630	Gm01:49084944-49093758	14-7-0	2014-07-07	OK	1.70214	3.0135	0.824092	-1.17292	0.24083	0.626118	no
Glyma01g36638	Glyma01g36638	Glyma01g36638	Gm01:49107386-49109822	14-7-0	2014-07-07	OK	5.6781	10.6883	0.912551	-1.3685	0.171157	0.537662	no
Glyma01g36646	Glyma01g36646	Glyma01g36646	Gm01:49109982-49111565	14-7-0	2014-07-07	OK	2.96435	4.77984	0.689246	-0.724112	0.468997	0.817483	no
Glyma01g36654	Glyma01g36654	Glyma01g36654	Gm01:49113570-49119201	14-7-0	2014-07-07	OK	3.41768	1.98317	-0.785206	0.729683	0.465584	0.816286	no
Glyma01g36662	Glyma01g36662	Glyma01g36662	Gm01:49119339-49122865	14-7-0	2014-07-07	OK	10.5988	14.7473	0.476555	-0.804403	0.421164	0.788933	no
Glyma01g36670	Glyma01g36670	Glyma01g36670	Gm01:49124364-49127508	14-7-0	2014-07-07	OK	5.26255	11.5128	1.12941	-1.51418	0.129979	0.469103	no
Glyma01g36680	Glyma01g36680	Glyma01g36680	Gm01:49129327-49137766	14-7-0	2014-07-07	OK	2.45699	3.88964	0.66274	-1.02735	0.304256	0.697903	no
Glyma01g36691	Glyma01g36691	Glyma01g36691	Gm01:49144740-49145859	14-7-0	2014-07-07	NOTEST	0	0.257392	1.79769e+308	1.79769e+308	0.0980491	1	no
Glyma01g36700	Glyma01g36700	Glyma01g36700	Gm01:49146933-49155639	14-7-0	2014-07-07	OK	4.22939	8.21468	0.957754	-1.44006	0.149851	0.503829	no
Glyma01g36711	Glyma01g36711	Glyma01g36711	Gm01:49159187-49159524	14-7-0	2014-07-07	OK	0	0.860902	1.79769e+308	1.79769e+308	0.180329	0.547398	no
Glyma01g36720	Glyma01g36720	Glyma01g36720	Gm01:49164706-49167830	14-7-0	2014-07-07	OK	0.0872598	2.09836	4.5878	-3.11601	0.00183314	0.0338975	yes
Glyma01g36730	Glyma01g36730	Glyma01g36730	Gm01:49171301-49172211	14-7-0	2014-07-07	OK	0.743726	0.303153	-1.29473	1.09902	0.271758	0.662426	no
Glyma01g36740	Glyma01g36740	Glyma01g36740	Gm01:49175886-49179312	14-7-0	2014-07-07	OK	10.5549	8.95155	-0.237699	0.392739	0.694512	0.921746	no
Glyma01g36750	Glyma01g36750	Glyma01g36750	Gm01:49180569-49188788	14-7-0	2014-07-07	OK	4.67542	15.834	1.75985	-2.9193	0.00350823	0.0528407	no
Glyma01g36760	Glyma01g36760	Glyma01g36760	Gm01:49196842-49199569	14-7-0	2014-07-07	OK	1.59605	3.59761	1.17253	-1.17652	0.239386	0.624664	no
Glyma01g36770	Glyma01g36770	Glyma01g36770	Gm01:49207142-49211246	14-7-0	2014-07-07	OK	1.3813	4.92677	1.83461	-2.22195	0.0262865	0.191021	no
Glyma01g36780	Glyma01g36780	Glyma01g36780	Gm01:49213870-49215923	14-7-0	2014-07-07	OK	4.33914	5.61834	0.372737	-0.49437	0.621045	0.897904	no
Glyma01g36790	Glyma01g36790	Glyma01g36790	Gm01:49215924-49218539	14-7-0	2014-07-07	OK	4.08325	3.86126	-0.0806458	0.0936505	0.925387	0.983182	no
Glyma01g36801	Glyma01g36801	Glyma01g36801	Gm01:49220679-49225998	14-7-0	2014-07-07	OK	4.44544	3.44462	-0.367982	0.597295	0.55031	0.864032	no
Glyma01g36810	Glyma01g36810	Glyma01g36810	Gm01:49235149-49235590	14-7-0	2014-07-07	NOTEST	0	0	0	0	1	1	no
Glyma01g36820	Glyma01g36820	Glyma01g36820	Gm01:49253297-49254542	14-7-0	2014-07-07	NOTEST	0.0921983	0.074097	-0.315326	0.152539	0.878762	1	no
Glyma01g36831	Glyma01g36831	Glyma01g36831	Gm01:49256521-49258723	14-7-0	2014-07-07	OK	1.9948	1.64129	-0.281412	0.336852	0.736228	0.934532	no
Glyma01g36840	Glyma01g36840	Glyma01g36840	Gm01:49263069-49265363	14-7-0	2014-07-07	OK	2.52038	3.90618	0.63212	-0.972573	0.330765	0.720083	no
Glyma01g36850	Glyma01g36850	Glyma01g36850	Gm01:49266433-49268941	14-7-0	2014-07-07	OK	46.939	78.1864	0.736129	-1.18749	0.235036	0.619223	no
Glyma01g36860	Glyma01g36860	Glyma01g36860	Gm01:49271742-49278414	14-7-0	2014-07-07	OK	2.17994	6.69739	1.61931	-2.24753	0.0246062	0.183508	no
Glyma01g36870	Glyma01g36870	Glyma01g36870	Gm01:49289720-49299050	14-7-0	2014-07-07	OK	5.25273	5.07137	-0.0506925	0.0851114	0.932173	0.985454	no
Glyma01g36880	Glyma01g36880	Glyma01g36880	Gm01:49300170-49302868	14-7-0	2014-07-07	OK	13.6441	17.5638	0.364331	-0.561195	0.574665	0.877552	no
Glyma01g36890	Glyma01g36890	Glyma01g36890	Gm01:49306067-49309782	14-7-0	2014-07-07	OK	28.3433	36.2315	0.354236	-0.579092	0.562527	0.871048	no
Glyma01g36900	Glyma01g36900	Glyma01g36900	Gm01:49311611-49314379	14-7-0	2014-07-07	OK	0.0736321	0.631574	3.10055	-2.02629	0.0427347	0.251575	no
Glyma01g36920	Glyma01g36920	Glyma01g36920	Gm01:49322909-49327222	14-7-0	2014-07-07	NOTEST	0	0.0195982	1.79769e+308	1.79769e+308	0.180329	1	no
Glyma01g36931	Glyma01g36931	Glyma01g36931	Gm01:49327330-49331955	14-7-0	2014-07-07	NOTEST	0	0.35559	1.79769e+308	1.79769e+308	0.0539625	1	no
Glyma01g36940	Glyma01g36940	Glyma01g36940	Gm01:49334742-49338803	14-7-0	2014-07-07	OK	0.139423	1.49174	3.41945	-2.97194	0.00295928	0.0470339	yes
Glyma01g36950	Glyma01g36950	Glyma01g36950	Gm01:49340202-49347954	14-7-0	2014-07-07	NOTEST	0.243295	0.107983	-1.17191	1.12587	0.260221	1	no
Glyma01g36960	Glyma01g36960	Glyma01g36960	Gm01:49357372-49363143	14-7-0	2014-07-07	OK	1.0413	3.60961	1.79346	-2.38958	0.0168676	0.147544	no
Glyma01g36980	Glyma01g36980	Glyma01g36980	Gm01:49366425-49374835	14-7-0	2014-07-07	NOTEST	0	0	0	0	1	1	no
Glyma01g36990	Glyma01g36990	Glyma01g36990	Gm01:49378227-49384148	14-7-0	2014-07-07	OK	11.3446	8.62195	-0.395922	0.630839	0.528146	0.852776	no
Glyma01g37000	Glyma01g37000	Glyma01g37000	Gm01:49386620-49392224	14-7-0	2014-07-07	NOTEST	0.0816968	0.153523	0.9101	-0.594911	0.551903	1	no
Glyma01g37010	Glyma01g37010	Glyma01g37010	Gm01:49392804-49394717	14-7-0	2014-07-07	OK	12.5905	4.32013	-1.54319	2.30965	0.0209073	0.165899	no
Glyma01g37020	Glyma01g37020	Glyma01g37020	Gm01:49402192-49404630	14-7-0	2014-07-07	OK	12.6494	14.1058	0.157223	-0.265795	0.790397	0.950064	no
Glyma01g37031	Glyma01g37031	Glyma01g37031	Gm01:49405105-49407262	14-7-0	2014-07-07	NOTEST	0	0	0	0	1	1	no
Glyma01g37040	Glyma01g37040	Glyma01g37040	Gm01:49421021-49423263	14-7-0	2014-07-07	OK	0.744725	0.310391	-1.26262	1.23406	0.217182	0.598847	no
Glyma01g37051	Glyma01g37051	Glyma01g37051	Gm01:49432478-49435070	14-7-0	2014-07-07	NOTEST	0	0	0	0	1	1	no
Glyma01g37060	Glyma01g37060	Glyma01g37060	Gm01:49439171-49440019	14-7-0	2014-07-07	NOTEST	0	0	0	0	1	1	no
Glyma01g37080	Glyma01g37080	Glyma01g37080	Gm01:49455121-49457778	14-7-0	2014-07-07	OK	2.73038	1.61245	-0.759851	1.12733	0.259605	0.64882	no
Glyma01g37090	Glyma01g37090	Glyma01g37090	Gm01:49471613-49473084	14-7-0	2014-07-07	OK	17.9654	30.0844	0.743798	-1.24907	0.211638	0.590926	no
Glyma01g37100	Glyma01g37100	Glyma01g37100	Gm01:49482623-49488331	14-7-0	2014-07-07	OK	2.09922	2.04064	-0.040831	0.0549509	0.956178	0.991559	no
Glyma01g37120	Glyma01g37120	Glyma01g37120	Gm01:49513343-49516212	14-7-0	2014-07-07	NOTEST	0	0	0	0	1	1	no
Glyma01g37130	Glyma01g37130	Glyma01g37130	Gm01:49518056-49520062	14-7-0	2014-07-07	NOTEST	0.0603165	0.0913619	0.599039	-0.344263	0.730649	1	no
Glyma01g37136	Glyma01g37136	Glyma01g37136	Gm01:49520615-49552178	14-7-0	2014-07-07	OK	2.17922	2.54333	0.222908	-0.375045	0.707627	0.927004	no
Glyma01g37143	Glyma01g37143	Glyma01g37143	Gm01:49520615-49552178	14-7-0	2014-07-07	NOTEST	0.161119	0	-1.79769e+308	-1.79769e+308	0.42933	1	no
Glyma01g37150	Glyma01g37150	Glyma01g37150	Gm01:49557207-49558582	14-7-0	2014-07-07	NOTEST	0	0.154859	1.79769e+308	1.79769e+308	0.0638309	1	no
Glyma01g37160	Glyma01g37160	Glyma01g37160	Gm01:49559523-49562407	14-7-0	2014-07-07	OK	4.79672	4.32941	-0.147878	0.220778	0.825265	0.958641	no
Glyma01g37180	Glyma01g37180	Glyma01g37180	Gm01:49563492-49567476	14-7-0	2014-07-07	OK	7.49333	4.08943	-0.873706	1.37164	0.170175	0.535888	no
Glyma01g37190	Glyma01g37190	Glyma01g37190	Gm01:49585069-49586870	14-7-0	2014-07-07	NOTEST	0	0	0	0	1	1	no
Glyma01g37200	Glyma01g37200	Glyma01g37200	Gm01:49597448-49598567	14-7-0	2014-07-07	NOTEST	0.128413	0.0951646	-0.432295	0.209123	0.834353	1	no
Glyma01g37215	Glyma01g37215	Glyma01g37215	Gm01:49610632-49612072	14-7-0	2014-07-07	NOTEST	0.0597487	0.0469959	-0.346373	0.141012	0.887861	1	no
Glyma01g37230	Glyma01g37230	Glyma01g37230	Gm01:49610632-49612072	14-7-0	2014-07-07	NOTEST	0	0	0	0	1	1	no
Glyma01g37240	Glyma01g37240	Glyma01g37240	Gm01:49616496-49621295	14-7-0	2014-07-07	NOTEST	0.206474	0.129488	-0.673144	0.59273	0.553362	1	no
Glyma01g37250	Glyma01g37250	Glyma01g37250	Gm01:49624839-49626433	14-7-0	2014-07-07	OK	103.224	92.9911	-0.150615	0.229982	0.818106	0.957405	no
Glyma01g37270	Glyma01g37270	Glyma01g37270	Gm01:49637622-49639519	14-7-0	2014-07-07	OK	29.919	46.7339	0.643404	-1.02405	0.30581	0.698647	no
Glyma01g37290	Glyma01g37290	Glyma01g37290	Gm01:49639992-49643961	14-7-0	2014-07-07	OK	8.90914	8.59982	-0.0509801	0.0646577	0.948447	0.989981	no
Glyma01g37296	Glyma01g37296	Glyma01g37296	Gm01:49646115-49646903	14-7-0	2014-07-07	OK	45.7254	108.781	1.25036	-2.02581	0.0427841	0.251721	no
Glyma01g37303	Glyma01g37303	Glyma01g37303	Gm01:49646973-49647556	14-7-0	2014-07-07	OK	1.29999	0.247071	-2.3955	1.35025	0.176937	0.54558	no
Glyma01g37310	Glyma01g37310	Glyma01g37310	Gm01:49651805-49656854	14-7-0	2014-07-07	NOTEST	0.271681	0.337365	0.3124	-0.277061	0.781734	1	no
Glyma01g37320	Glyma01g37320	Glyma01g37320	Gm01:49680382-49682445	14-7-0	2014-07-07	OK	16.1708	18.8615	0.222052	-0.373044	0.709115	0.927365	no
Glyma01g37330	Glyma01g37330	Glyma01g37330	Gm01:49688213-49691604	14-7-0	2014-07-07	NOTEST	0.0848167	0.0750126	-0.177216	0.14024	0.88847	1	no
Glyma01g37341	Glyma01g37341	Glyma01g37341	Gm01:49698283-49706430	14-7-0	2014-07-07	OK	3.13459	4.29115	0.453087	-0.693107	0.488242	0.829453	no
Glyma01g37350	Glyma01g37350	Glyma01g37350	Gm01:49711599-49713520	14-7-0	2014-07-07	NOTEST	0	0	0	0	1	1	no
Glyma01g37360	Glyma01g37360	Glyma01g37360	Gm01:49721188-49723541	14-7-0	2014-07-07	OK	0.283253	19.333	6.09284	-6.18179	6.33768e-10	3.03605e-07	yes
Glyma01g37370	Glyma01g37370	Glyma01g37370	Gm01:49725132-49728656	14-7-0	2014-07-07	OK	41.7043	8.14964	-2.35539	3.8249	0.000130828	0.00514726	yes
Glyma01g37380	Glyma01g37380	Glyma01g37380	Gm01:49736248-49744811	14-7-0	2014-07-07	OK	5.15849	2.74638	-0.909417	1.3306	0.18332	0.551748	no
Glyma01g37393	Glyma01g37393	Glyma01g37393	Gm01:49755262-49762118	14-7-0	2014-07-07	OK	4.07337	3.09449	-0.396522	0.666793	0.504904	0.839274	no
Glyma01g37406	Glyma01g37406	Glyma01g37406	Gm01:49766181-49770448	14-7-0	2014-07-07	OK	3.38177	3.2287	-0.0668267	0.0998554	0.920459	0.981853	no
Glyma01g37420	Glyma01g37420	Glyma01g37420	Gm01:49772165-49778547	14-7-0	2014-07-07	OK	1.33625	1.1916	-0.165297	0.222476	0.823943	0.958464	no
Glyma01g37430	Glyma01g37430	Glyma01g37430	Gm01:49781351-49784822	14-7-0	2014-07-07	NOTEST	0.0595078	0.348545	2.55019	-1.95806	0.050223	1	no
Glyma01g37440	Glyma01g37440	Glyma01g37440	Gm01:49804689-49806831	14-7-0	2014-07-07	NOTEST	0	0	0	0	1	1	no
Glyma01g37450	Glyma01g37450	Glyma01g37450	Gm01:49804689-49806831	14-7-0	2014-07-07	OK	2.25165	5.35031	1.24864	-1.83458	0.0665684	0.32355	no
Glyma01g37460	Glyma01g37460	Glyma01g37460	Gm01:49816977-49818918	14-7-0	2014-07-07	OK	6.19106	9.11566	0.558161	-0.92271	0.356158	0.743174	no
Glyma01g37470	Glyma01g37470	Glyma01g37470	Gm01:49821773-49824393	14-7-0	2014-07-07	NOTEST	0	0.0487799	1.79769e+308	1.79769e+308	0.312999	1	no
Glyma01g37480	Glyma01g37480	Glyma01g37480	Gm01:49830529-49834966	14-7-0	2014-07-07	OK	16.6861	21.4228	0.360499	-0.606236	0.544358	0.860911	no
Glyma01g37490	Glyma01g37490	Glyma01g37490	Gm01:49841544-49848877	14-7-0	2014-07-07	OK	4.03416	4.106	0.0254675	-0.0356912	0.971529	0.994428	no
Glyma01g37500	Glyma01g37500	Glyma01g37500	Gm01:49850120-49854265	14-7-0	2014-07-07	OK	10.3311	12.0268	0.219255	-0.369085	0.712065	0.928197	no
Glyma01g37510	Glyma01g37510	Glyma01g37510	Gm01:49858452-49865847	14-7-0	2014-07-07	OK	0.0784725	1.61945	4.36718	-3.94934	7.83672e-05	0.00348717	yes
Glyma01g37520	Glyma01g37520	Glyma01g37520	Gm01:49869523-49871376	14-7-0	2014-07-07	OK	2.89488	1.58293	-0.87091	1.15846	0.246677	0.633609	no
Glyma01g37530	Glyma01g37530	Glyma01g37530	Gm01:49872196-49872388	14-7-0	2014-07-07	NOTEST	0	0	0	0	1	1	no
Glyma01g37541	Glyma01g37541	Glyma01g37541	Gm01:49879281-49885195	14-7-0	2014-07-07	OK	19.384	56.0354	1.53147	-2.32063	0.020307	0.163539	no
Glyma01g37550	Glyma01g37550	Glyma01g37550	Gm01:49885628-49888995	14-7-0	2014-07-07	OK	80.7543	122.395	0.599939	-0.927911	0.353454	0.740656	no
Glyma01g37560	Glyma01g37560	Glyma01g37560	Gm01:49891280-49893312	14-7-0	2014-07-07	OK	3.7288	7.33008	0.975117	-1.21026	0.226178	0.609555	no
Glyma01g37571	Glyma01g37571	Glyma01g37571	Gm01:49893933-49905366	14-7-0	2014-07-07	NOTEST	0	0	0	0	1	1	no
Glyma01g37580	Glyma01g37580	Glyma01g37580	Gm01:49893933-49905366	14-7-0	2014-07-07	OK	14.099	13.6518	-0.0464966	0.07335	0.941528	0.988236	no
Glyma01g37590	Glyma01g37590	Glyma01g37590	Gm01:49909450-49916251	14-7-0	2014-07-07	OK	0.740117	0.317976	-1.21883	1.1719	0.241237	0.626617	no
Glyma01g37600	Glyma01g37600	Glyma01g37600	Gm01:49942124-49946080	14-7-0	2014-07-07	NOTEST	0	0	0	0	1	1	no
Glyma01g37610	Glyma01g37610	Glyma01g37610	Gm01:49946274-49947782	14-7-0	2014-07-07	OK	7.98079	6.08646	-0.390928	0.499226	0.61762	0.897477	no
Glyma01g37620	Glyma01g37620	Glyma01g37620	Gm01:49949013-49952809	14-7-0	2014-07-07	OK	1.15499	1.22747	0.0878015	-0.104641	0.916661	0.981234	no
Glyma01g37630	Glyma01g37630	Glyma01g37630	Gm01:49953469-49956749	14-7-0	2014-07-07	NOTEST	0.0525965	0	-1.79769e+308	-1.79769e+308	0.139932	1	no
Glyma01g37640	Glyma01g37640	Glyma01g37640	Gm01:49963812-49969112	14-7-0	2014-07-07	NOTEST	0	0	0	0	1	1	no
Glyma01g37650	Glyma01g37650	Glyma01g37650	Gm01:49975720-49977560	14-7-0	2014-07-07	NOTEST	0	0	0	0	1	1	no
Glyma01g37670	Glyma01g37670	Glyma01g37670	Gm01:49982520-49986256	14-7-0	2014-07-07	OK	0.84141	1.98263	1.23653	-1.55976	0.118816	0.447791	no
Glyma01g37675	Glyma01g37675	Glyma01g37675	Gm01:49992409-49993063	14-7-0	2014-07-07	NOTEST	0	0	0	0	1	1	no
Glyma01g37680	Glyma01g37680	Glyma01g37680	Gm01:49999698-50001148	14-7-0	2014-07-07	NOTEST	0	0	0	0	1	1	no
Glyma01g37690	Glyma01g37690	Glyma01g37690	Gm01:50011031-50012116	14-7-0	2014-07-07	NOTEST	0.183658	0	-1.79769e+308	-1.79769e+308	0.066394	1	no
Glyma01g37710	Glyma01g37710	Glyma01g37710	Gm01:50023553-50027805	14-7-0	2014-07-07	OK	16.9014	13.3925	-0.335724	0.566382	0.571134	0.876046	no
Glyma01g37720	Glyma01g37720	Glyma01g37720	Gm01:50028224-50031144	14-7-0	2014-07-07	OK	4.96839	13.0736	1.3958	-2.1919	0.0283867	0.199933	no
Glyma01g37730	Glyma01g37730	Glyma01g37730	Gm01:50039747-50044012	14-7-0	2014-07-07	OK	4.00897	6.58609	0.716191	-1.17236	0.241054	0.62647	no
Glyma01g37750	Glyma01g37750	Glyma01g37750	Gm01:50051364-50051706	14-7-0	2014-07-07	NOTEST	0	0	0	0	1	1	no
Glyma01g37760	Glyma01g37760	Glyma01g37760	Gm01:50053788-50061598	14-7-0	2014-07-07	OK	3.31128	1.0835	-1.61169	2.30285	0.0212875	0.167774	no
Glyma01g37780	Glyma01g37780	Glyma01g37780	Gm01:50066372-50070574	14-7-0	2014-07-07	OK	11.3194	11.9127	0.073704	-0.122706	0.90234	0.978342	no
Glyma01g37790	Glyma01g37790	Glyma01g37790	Gm01:50071761-50075271	14-7-0	2014-07-07	OK	26.0326	15.7914	-0.721182	1.08873	0.276274	0.668004	no
Glyma01g37801	Glyma01g37801	Glyma01g37801	Gm01:50076638-50080885	14-7-0	2014-07-07	NOTEST	0	0	0	0	1	1	no
Glyma01g37810	Glyma01g37810	Glyma01g37810	Gm01:50095935-50098278	14-7-0	2014-07-07	OK	0.698021	2.19822	1.65499	-1.89554	0.0580205	0.299923	no
Glyma01g37820	Glyma01g37820	Glyma01g37820	Gm01:50121728-50127532	14-7-0	2014-07-07	NOTEST	0.153322	0.0380383	-2.01104	1.11002	0.266991	1	no
Glyma01g37840	Glyma01g37840	Glyma01g37840	Gm01:50130998-50133253	14-7-0	2014-07-07	NOTEST	0	0	0	0	1	1	no
Glyma01g37850	Glyma01g37850	Glyma01g37850	Gm01:50135076-50137305	14-7-0	2014-07-07	OK	0.0596196	0.693477	3.53999	-2.34211	0.0191751	0.158375	no
Glyma01g37860	Glyma01g37860	Glyma01g37860	Gm01:50141791-50144442	14-7-0	2014-07-07	OK	1.39809	1.99683	0.51425	-0.635135	0.52534	0.850975	no
Glyma01g37870	Glyma01g37870	Glyma01g37870	Gm01:50146983-50150059	14-7-0	2014-07-07	OK	68.3187	14.2096	-2.26541	3.28254	0.00102875	0.0229552	yes
Glyma01g37880	Glyma01g37880	Glyma01g37880	Gm01:50151986-50153270	14-7-0	2014-07-07	NOTEST	0	0.0984603	1.79769e+308	1.79769e+308	0.0980491	1	no
Glyma01g37890	Glyma01g37890	Glyma01g37890	Gm01:50153494-50155300	14-7-0	2014-07-07	OK	1.86679	3.77285	1.01509	-1.40186	0.160956	0.521257	no
Glyma01g37900	Glyma01g37900	Glyma01g37900	Gm01:50155332-50163097	14-7-0	2014-07-07	OK	112.932	114.537	0.0203567	-0.0293633	0.976575	0.995201	no
Glyma01g37910	Glyma01g37910	Glyma01g37910	Gm01:50155332-50163097	14-7-0	2014-07-07	OK	3.2492	3.75939	0.210414	-0.0752814	0.939991	0.987939	no
Glyma01g37920	Glyma01g37920	Glyma01g37920	Gm01:50155332-50163097	14-7-0	2014-07-07	NOTEST	0.220402	0.227066	0.0429757	-0.00325897	0.9974	1	no
Glyma01g37930	Glyma01g37930	Glyma01g37930	Gm01:50166501-50169549	14-7-0	2014-07-07	OK	0.0399017	2.86983	6.16837	-4.34637	1.38407e-05	0.000915933	yes
Glyma01g37940	Glyma01g37940	Glyma01g37940	Gm01:50177417-50180805	14-7-0	2014-07-07	OK	5.19133	7.61046	0.551879	-0.912492	0.36151	0.746409	no
Glyma01g37950	Glyma01g37950	Glyma01g37950	Gm01:50182416-50188946	14-7-0	2014-07-07	OK	2.02119	0.594308	-1.76592	2.25969	0.0238407	0.180158	no
Glyma01g37961	Glyma01g37961	Glyma01g37961	Gm01:50206805-50209153	14-7-0	2014-07-07	NOTEST	0	0	0	0	1	1	no
Glyma01g37970	Glyma01g37970	Glyma01g37970	Gm01:50210431-50216350	14-7-0	2014-07-07	OK	0.809248	1.45958	0.850904	-1.06327	0.287658	0.681212	no
Glyma01g37980	Glyma01g37980	Glyma01g37980	Gm01:50217118-50219743	14-7-0	2014-07-07	NOTEST	0	0	0	0	1	1	no
Glyma01g37993	Glyma01g37993	Glyma01g37993	Gm01:50222810-50223758	14-7-0	2014-07-07	NOTEST	0.398509	0.361226	-0.141711	0.119519	0.904864	1	no
Glyma01g38006	Glyma01g38006	Glyma01g38006	Gm01:50230283-50235022	14-7-0	2014-07-07	NOTEST	0	0	0	0	1	1	no
Glyma01g38020	Glyma01g38020	Glyma01g38020	Gm01:50230283-50235022	14-7-0	2014-07-07	LOWDATA	0	0	0	0	1	1	no
Glyma01g38040	Glyma01g38040	Glyma01g38040	Gm01:50244376-50247091	14-7-0	2014-07-07	NOTEST	0	0	0	0	1	1	no
Glyma01g38050	Glyma01g38050	Glyma01g38050	Gm01:50251094-50252088	14-7-0	2014-07-07	NOTEST	0	0	0	0	1	1	no
Glyma01g38060	Glyma01g38060	Glyma01g38060	Gm01:50253664-50255929	14-7-0	2014-07-07	NOTEST	0	0	0	0	1	1	no
Glyma01g38070	Glyma01g38070	Glyma01g38070	Gm01:50257294-50261107	14-7-0	2014-07-07	OK	7.27232	4.98988	-0.543411	0.751082	0.452603	0.807114	no
Glyma01g38080	Glyma01g38080	Glyma01g38080	Gm01:50257294-50261107	14-7-0	2014-07-07	OK	4.29026	1.35169	-1.6663	0.653116	0.513681	0.844167	no
Glyma01g38090	Glyma01g38090	Glyma01g38090	Gm01:50261440-50263777	14-7-0	2014-07-07	OK	2.95718	4.30579	0.542056	-0.806329	0.420053	0.788173	no
Glyma01g38105	Glyma01g38105	Glyma01g38105	Gm01:50271874-50276395	14-7-0	2014-07-07	NOTEST	0.0938814	0.0685323	-0.454055	0.299622	0.764465	1	no
Glyma01g38120	Glyma01g38120	Glyma01g38120	Gm01:50277040-50282069	14-7-0	2014-07-07	OK	30.7277	16.6297	-0.885781	1.44003	0.149858	0.503829	no
Glyma01g38130	Glyma01g38130	Glyma01g38130	Gm01:50286808-50291347	14-7-0	2014-07-07	OK	0.157254	8.32927	5.72702	-6.0633	1.33356e-09	5.67857e-07	yes
Glyma01g38150	Glyma01g38150	Glyma01g38150	Gm01:50297901-50304459	14-7-0	2014-07-07	NOTEST	0.458669	0.464406	0.0179326	-0.0194359	0.984493	1	no
Glyma01g38165	Glyma01g38165	Glyma01g38165	Gm01:50306261-50309677	14-7-0	2014-07-07	OK	4.76673	2.37973	-1.0022	1.21788	0.223271	0.606367	no
Glyma01g38180	Glyma01g38180	Glyma01g38180	Gm01:50334433-50339882	14-7-0	2014-07-07	OK	0.545072	5.09622	3.22491	-3.9308	8.46635e-05	0.00369758	yes
Glyma01g38190	Glyma01g38190	Glyma01g38190	Gm01:50334433-50339882	14-7-0	2014-07-07	OK	0.135213	1.34297	3.31212	-0.998415	0.318078	0.70946	no
Glyma01g38200	Glyma01g38200	Glyma01g38200	Gm01:50344732-50351525	14-7-0	2014-07-07	OK	12.2627	14.6626	0.257867	-0.432318	0.665511	0.913536	no
Glyma01g38211	Glyma01g38211	Glyma01g38211	Gm01:50359266-50363158	14-7-0	2014-07-07	OK	230.424	210.453	-0.130788	0.110559	0.911966	0.980637	no
Glyma01g38220	Glyma01g38220	Glyma01g38220	Gm01:50366968-50368330	14-7-0	2014-07-07	OK	0.796018	0.442783	-0.846202	0.798368	0.424657	0.79146	no
Glyma01g38230	Glyma01g38230	Glyma01g38230	Gm01:50369093-50373219	14-7-0	2014-07-07	OK	5.97675	9.24727	0.629667	-0.962008	0.336046	0.725203	no
Glyma01g38240	Glyma01g38240	Glyma01g38240	Gm01:50382617-50389821	14-7-0	2014-07-07	OK	2.44478	1.85367	-0.399318	0.609907	0.541923	0.859758	no
Glyma01g38250	Glyma01g38250	Glyma01g38250	Gm01:50392826-50393355	14-7-0	2014-07-07	NOTEST	0	0	0	0	1	1	no
Glyma01g38260	Glyma01g38260	Glyma01g38260	Gm01:50394489-50396439	14-7-0	2014-07-07	OK	2.05715	0.741061	-1.47298	1.47088	0.141322	0.48922	no
Glyma01g38270	Glyma01g38270	Glyma01g38270	Gm01:50396914-50399570	14-7-0	2014-07-07	OK	2.10707	2.20026	0.0624339	-0.0743529	0.94073	0.988161	no
Glyma01g38280	Glyma01g38280	Glyma01g38280	Gm01:50400416-50410022	14-7-0	2014-07-07	OK	1.04996	1.13193	0.108449	-0.150612	0.880282	0.973458	no
Glyma01g38285	Glyma01g38285	Glyma01g38285	Gm01:50429282-50431539	14-7-0	2014-07-07	NOTEST	0	0	0	0	1	1	no
Glyma01g38290	Glyma01g38290	Glyma01g38290	Gm01:50444755-50448681	14-7-0	2014-07-07	OK	10.1771	6.60928	-0.622764	1.04861	0.294358	0.688267	no
Glyma01g38305	Glyma01g38305	Glyma01g38305	Gm01:50449917-50454973	14-7-0	2014-07-07	OK	1.31717	1.27047	-0.0520755	0.0635673	0.949315	0.989981	no
Glyma01g38320	Glyma01g38320	Glyma01g38320	Gm01:50456603-50460237	14-7-0	2014-07-07	OK	14.6509	14.6051	-0.00451659	0.00675253	0.994612	0.998946	no
Glyma01g38330	Glyma01g38330	Glyma01g38330	Gm01:50462526-50464658	14-7-0	2014-07-07	OK	2.19151	2.30926	0.0755047	-0.0817737	0.934827	0.986468	no
Glyma01g38340	Glyma01g38340	Glyma01g38340	Gm01:50465731-50468463	14-7-0	2014-07-07	NOTEST	0	0.0187438	1.79769e+308	1.79769e+308	0.180329	1	no
Glyma01g38350	Glyma01g38350	Glyma01g38350	Gm01:50468718-50471279	14-7-0	2014-07-07	NOTEST	0.193531	0.246115	0.346765	-0.280059	0.779432	1	no
Glyma01g38360	Glyma01g38360	Glyma01g38360	Gm01:50481849-50484062	14-7-0	2014-07-07	OK	6.2631	5.32404	-0.234356	0.388018	0.698003	0.922888	no
Glyma01g38370	Glyma01g38370	Glyma01g38370	Gm01:50487836-50491942	14-7-0	2014-07-07	OK	9.05639	7.97293	-0.183826	0.277752	0.781203	0.94797	no
Glyma01g38381	Glyma01g38381	Glyma01g38381	Gm01:50492109-50499655	14-7-0	2014-07-07	NOTEST	0.117262	0.177136	0.59512	-0.43822	0.661227	1	no
Glyma01g38390	Glyma01g38390	Glyma01g38390	Gm01:50502781-50505172	14-7-0	2014-07-07	NOTEST	0	0	0	0	1	1	no
Glyma01g38400	Glyma01g38400	Glyma01g38400	Gm01:50522426-50525037	14-7-0	2014-07-07	OK	2.44055	3.97704	0.70449	-1.0259	0.304937	0.69842	no
Glyma01g38410	Glyma01g38410	Glyma01g38410	Gm01:50528621-50536566	14-7-0	2014-07-07	OK	9.20561	9.81795	0.0929091	-0.152334	0.878923	0.973338	no
Glyma01g38430	Glyma01g38430	Glyma01g38430	Gm01:50543383-50544862	14-7-0	2014-07-07	NOTEST	0	0.0710289	1.79769e+308	1.79769e+308	0.0980491	1	no
Glyma01g38450	Glyma01g38450	Glyma01g38450	Gm01:50549840-50551564	14-7-0	2014-07-07	OK	10.1095	24.043	1.2499	-2.08069	0.0374623	0.232123	no
Glyma01g38460	Glyma01g38460	Glyma01g38460	Gm01:50559469-50563981	14-7-0	2014-07-07	OK	1.70163	2.40307	0.49796	-0.664773	0.506196	0.839963	no
Glyma01g38470	Glyma01g38470	Glyma01g38470	Gm01:50564247-50567428	14-7-0	2014-07-07	OK	55.3032	53.9079	-0.0368659	0.0561021	0.95526	0.991292	no
Glyma01g38481	Glyma01g38481	Glyma01g38481	Gm01:50571005-50572016	14-7-0	2014-07-07	NOTEST	0.273937	0	-1.79769e+308	-1.79769e+308	0.052437	1	no
Glyma01g38490	Glyma01g38490	Glyma01g38490	Gm01:50575585-50578085	14-7-0	2014-07-07	OK	0.569486	0.68502	0.266485	-0.28738	0.773821	0.94608	no
Glyma01g38500	Glyma01g38500	Glyma01g38500	Gm01:50580026-50582631	14-7-0	2014-07-07	OK	4.23567	0.0699392	-5.92034	4.8824	1.048e-06	0.000121247	yes
Glyma01g38510	Glyma01g38510	Glyma01g38510	Gm01:50585499-50587165	14-7-0	2014-07-07	OK	8.63586	5.52994	-0.643078	0.99612	0.319192	0.709963	no
Glyma01g38520	Glyma01g38520	Glyma01g38520	Gm01:50595299-50597560	14-7-0	2014-07-07	OK	0.849349	2.30705	1.44162	-1.76251	0.0779835	0.354522	no
Glyma01g38530	Glyma01g38530	Glyma01g38530	Gm01:50601604-50607434	14-7-0	2014-07-07	NOTEST	0	0	0	0	1	1	no
Glyma01g38540	Glyma01g38540	Glyma01g38540	Gm01:50612385-50613848	14-7-0	2014-07-07	NOTEST	0	0	0	0	1	1	no
Glyma01g38550	Glyma01g38550	Glyma01g38550	Gm01:50621610-50624263	14-7-0	2014-07-07	NOTEST	0	0	0	0	1	1	no
Glyma01g38560	Glyma01g38560	Glyma01g38560	Gm01:50625695-50629374	14-7-0	2014-07-07	NOTEST	0.176686	0.0997957	-0.824138	0.747998	0.454461	1	no
Glyma01g38570	Glyma01g38570	Glyma01g38570	Gm01:50630573-50632809	14-7-0	2014-07-07	NOTEST	0.23315	0.214419	-0.120823	0.103969	0.917194	1	no
Glyma01g38580	Glyma01g38580	Glyma01g38580	Gm01:50633743-50644902	14-7-0	2014-07-07	OK	0.414428	0.944184	1.18795	-1.57574	0.115086	0.43968	no
Glyma01g38590	Glyma01g38590	Glyma01g38590	Gm01:50645459-50648060	14-7-0	2014-07-07	OK	6.83112	4.31774	-0.661846	1.05991	0.289186	0.682539	no
Glyma01g38600	Glyma01g38600	Glyma01g38600	Gm01:50652785-50654854	14-7-0	2014-07-07	NOTEST	0.175281	0.136687	-0.358795	0.291275	0.770841	1	no
Glyma01g38610	Glyma01g38610	Glyma01g38610	Gm01:50657110-50660265	14-7-0	2014-07-07	NOTEST	0	0	0	0	1	1	no
Glyma01g38630	Glyma01g38630	Glyma01g38630	Gm01:50667181-50669294	14-7-0	2014-07-07	NOTEST	0	0.0352207	1.79769e+308	1.79769e+308	0.180329	1	no
Glyma01g38640	Glyma01g38640	Glyma01g38640	Gm01:50682059-50689940	14-7-0	2014-07-07	OK	9.80512	4.45671	-1.13756	1.65478	0.097969	0.402691	no
Glyma01g38650	Glyma01g38650	Glyma01g38650	Gm01:50714207-50721679	14-7-0	2014-07-07	OK	19.0997	17.9864	-0.0866401	0.138646	0.88973	0.976559	no
Glyma01g38660	Glyma01g38660	Glyma01g38660	Gm01:50733266-50737661	14-7-0	2014-07-07	NOTEST	0.246633	0.450359	0.868711	-0.862569	0.388375	1	no
Glyma01g38671	Glyma01g38671	Glyma01g38671	Gm01:50746604-50760836	14-7-0	2014-07-07	OK	0.576584	0.892614	0.630506	-0.815887	0.414565	0.784443	no
Glyma01g38680	Glyma01g38680	Glyma01g38680	Gm01:50767560-50772744	14-7-0	2014-07-07	OK	1.81227	1.18016	-0.618819	0.839658	0.4011	0.775466	no
Glyma01g38683	Glyma01g38683	Glyma01g38683	Gm01:50776465-50776986	14-7-0	2014-07-07	NOTEST	0	0	0	0	1	1	no
Glyma01g38686	Glyma01g38686	Glyma01g38686	Gm01:50778421-50779180	14-7-0	2014-07-07	NOTEST	0	0	0	0	1	1	no
Glyma01g38690	Glyma01g38690	Glyma01g38690	Gm01:50779484-50780771	14-7-0	2014-07-07	OK	0	1.07627	1.79769e+308	1.79769e+308	0.0135344	0.12947	no
Glyma01g38710	Glyma01g38710	Glyma01g38710	Gm01:50784350-50784782	14-7-0	2014-07-07	OK	0.81664	0.622029	-0.392718	0.302241	0.762468	0.942169	no
Glyma01g38720	Glyma01g38720	Glyma01g38720	Gm01:50799865-50800659	14-7-0	2014-07-07	NOTEST	0.586306	0.157278	-1.89833	1.37644	0.168684	1	no
Glyma01g38730	Glyma01g38730	Glyma01g38730	Gm01:50805196-50807200	14-7-0	2014-07-07	NOTEST	0.204438	0.371685	0.862419	-0.782197	0.434099	1	no
Glyma01g38740	Glyma01g38740	Glyma01g38740	Gm01:50808925-50811172	14-7-0	2014-07-07	OK	1.02624	1.73099	0.75422	-0.74988	0.453327	0.807586	no
Glyma01g38750	Glyma01g38750	Glyma01g38750	Gm01:50813274-50815197	14-7-0	2014-07-07	OK	733.799	1373.36	0.904252	-0.910232	0.3627	0.747083	no
Glyma01g38760	Glyma01g38760	Glyma01g38760	Gm01:50816662-50817396	14-7-0	2014-07-07	OK	4.61933	0	-1.79769e+308	-1.79769e+308	0.0204464	0.164101	no
Glyma01g38770	Glyma01g38770	Glyma01g38770	Gm01:50817872-50819939	14-7-0	2014-07-07	OK	7.016	3.71055	-0.919014	1.27104	0.203713	0.581249	no
Glyma01g38780	Glyma01g38780	Glyma01g38780	Gm01:50823650-50825788	14-7-0	2014-07-07	NOTEST	0.146999	0	-1.79769e+308	-1.79769e+308	0.052437	1	no
Glyma01g38800	Glyma01g38800	Glyma01g38800	Gm01:50835383-50838753	14-7-0	2014-07-07	OK	10.1541	9.10154	-0.157876	0.266797	0.789626	0.949713	no
Glyma01g38830	Glyma01g38830	Glyma01g38830	Gm01:50842944-50844670	14-7-0	2014-07-07	NOTEST	0	0	0	0	1	1	no
Glyma01g38840	Glyma01g38840	Glyma01g38840	Gm01:50846296-50851361	14-7-0	2014-07-07	OK	3.55854	4.25376	0.257455	-0.400397	0.688864	0.920274	no
Glyma01g38850	Glyma01g38850	Glyma01g38850	Gm01:50852873-50855077	14-7-0	2014-07-07	NOTEST	0	0	0	0	1	1	no
Glyma01g38860	Glyma01g38860	Glyma01g38860	Gm01:50858802-50861902	14-7-0	2014-07-07	NOTEST	0	0.0348951	1.79769e+308	1.79769e+308	0.180329	1	no
Glyma01g38870	Glyma01g38870	Glyma01g38870	Gm01:50865163-50867505	14-7-0	2014-07-07	NOTEST	0	0	0	0	1	1	no
Glyma01g38880	Glyma01g38880	Glyma01g38880	Gm01:50879358-50885115	14-7-0	2014-07-07	OK	1.53654	1.45208	-0.0815627	0.102573	0.918302	0.981393	no
Glyma01g38890	Glyma01g38890	Glyma01g38890	Gm01:50885116-50891376	14-7-0	2014-07-07	OK	1.91458	2.87647	0.587273	-0.926139	0.354374	0.741722	no
Glyma01g38900	Glyma01g38900	Glyma01g38900	Gm01:50896720-50898557	14-7-0	2014-07-07	NOTEST	0	0.060594	1.79769e+308	1.79769e+308	0.0980491	1	no
Glyma01g38905	Glyma01g38905	Glyma01g38905	Gm01:50904042-50904806	14-7-0	2014-07-07	NOTEST	0	0	0	0	1	1	no
Glyma01g38910	Glyma01g38910	Glyma01g38910	Gm01:50905481-50907657	14-7-0	2014-07-07	OK	1.30295	2.92581	1.16705	-1.35895	0.174162	0.54193	no
Glyma01g38920	Glyma01g38920	Glyma01g38920	Gm01:50914354-50920765	14-7-0	2014-07-07	OK	0.281158	1.32473	2.23624	-2.4214	0.0154607	0.139909	no
Glyma01g38930	Glyma01g38930	Glyma01g38930	Gm01:50921917-50923972	14-7-0	2014-07-07	OK	55.2424	99.1498	0.843834	-1.32695	0.184524	0.553392	no
Glyma01g38940	Glyma01g38940	Glyma01g38940	Gm01:50926261-50927303	14-7-0	2014-07-07	OK	178.034	221.235	0.313427	-0.453853	0.649934	0.908427	no
Glyma01g38950	Glyma01g38950	Glyma01g38950	Gm01:50927363-50936118	14-7-0	2014-07-07	OK	17.0094	9.51099	-0.838668	1.33965	0.18036	0.547436	no
Glyma01g38970	Glyma01g38970	Glyma01g38970	Gm01:50951026-50952807	14-7-0	2014-07-07	OK	0.453429	0.861954	0.926735	-0.935289	0.349639	0.737429	no
Glyma01g38980	Glyma01g38980	Glyma01g38980	Gm01:50956636-50960580	14-7-0	2014-07-07	OK	0.797177	4.49605	2.49569	-3.28289	0.00102749	0.0229504	yes
Glyma01g38990	Glyma01g38990	Glyma01g38990	Gm01:50965004-50966084	14-7-0	2014-07-07	NOTEST	0	0.352093	1.79769e+308	1.79769e+308	0.0638309	1	no
Glyma01g39000	Glyma01g39000	Glyma01g39000	Gm01:50968054-50971842	14-7-0	2014-07-07	OK	0.641405	0.907618	0.50085	-0.596082	0.55112	0.864596	no
Glyma01g39010	Glyma01g39010	Glyma01g39010	Gm01:50973225-50978011	14-7-0	2014-07-07	OK	0.521073	1.08996	1.06472	-1.293	0.19601	0.570078	no
Glyma01g39020	Glyma01g39020	Glyma01g39020	Gm01:50978689-50990291	14-7-0	2014-07-07	OK	2.13488	4.69451	1.13682	-1.53526	0.12472	0.459203	no
Glyma01g39030	Glyma01g39030	Glyma01g39030	Gm01:50993362-50998484	14-7-0	2014-07-07	OK	9.76464	4.27308	-1.19229	1.69022	0.0909861	0.388245	no
Glyma01g39040	Glyma01g39040	Glyma01g39040	Gm01:51015839-51018131	14-7-0	2014-07-07	OK	1.53935	0.0642268	-4.583	3.65858	0.000253612	0.00842416	yes
Glyma01g39050	Glyma01g39050	Glyma01g39050	Gm01:51020378-51026936	14-7-0	2014-07-07	OK	2.43052	1.90047	-0.354908	0.500972	0.616391	0.896602	no
Glyma01g39060	Glyma01g39060	Glyma01g39060	Gm01:51032159-51036122	14-7-0	2014-07-07	NOTEST	0	0.0298295	1.79769e+308	1.79769e+308	0.27089	1	no
Glyma01g39071	Glyma01g39071	Glyma01g39071	Gm01:51054324-51059649	14-7-0	2014-07-07	NOTEST	0	0	0	0	1	1	no
Glyma01g39080	Glyma01g39080	Glyma01g39080	Gm01:51065275-51067178	14-7-0	2014-07-07	NOTEST	0	0	0	0	1	1	no
Glyma01g39090	Glyma01g39090	Glyma01g39090	Gm01:51073678-51079219	14-7-0	2014-07-07	OK	1.06777	1.07117	0.00458668	-0.00584058	0.99534	0.999146	no
Glyma01g39100	Glyma01g39100	Glyma01g39100	Gm01:51080529-51083731	14-7-0	2014-07-07	OK	2.20903	1.31267	-0.750913	0.977083	0.328528	0.71836	no
Glyma01g39110	Glyma01g39110	Glyma01g39110	Gm01:51090471-51105666	14-7-0	2014-07-07	NOTEST	0.364409	0.364669	0.00102642	-0.00101214	0.999192	1	no
Glyma01g39120	Glyma01g39120	Glyma01g39120	Gm01:51105888-51110702	14-7-0	2014-07-07	OK	36.5054	45.1077	0.305265	-0.343603	0.731145	0.933231	no
Glyma01g39141	Glyma01g39141	Glyma01g39141	Gm01:51125197-51131131	14-7-0	2014-07-07	OK	2.52825	2.55649	0.0160265	-0.0258837	0.97935	0.995426	no
Glyma01g39160	Glyma01g39160	Glyma01g39160	Gm01:51146769-51147427	14-7-0	2014-07-07	NOTEST	0	0	0	0	1	1	no
Glyma01g39170	Glyma01g39170	Glyma01g39170	Gm01:51153265-51154075	14-7-0	2014-07-07	NOTEST	0	0	0	0	1	1	no
Glyma01g39180	Glyma01g39180	Glyma01g39180	Gm01:51160065-51160350	14-7-0	2014-07-07	NOTEST	0	0	0	0	1	1	no
Glyma01g39190	Glyma01g39190	Glyma01g39190	Gm01:51164315-51168296	14-7-0	2014-07-07	OK	0.676371	1.5417	1.18864	-1.03856	0.299011	0.692401	no
Glyma01g39200	Glyma01g39200	Glyma01g39200	Gm01:51176939-51182827	14-7-0	2014-07-07	OK	56.2482	41.8217	-0.427555	0.67913	0.497055	0.834718	no
Glyma01g39220	Glyma01g39220	Glyma01g39220	Gm01:51195447-51198098	14-7-0	2014-07-07	OK	1.10177	7.39577	2.74687	-3.74104	0.000183264	0.00665721	yes
Glyma01g39230	Glyma01g39230	Glyma01g39230	Gm01:51207026-51208664	14-7-0	2014-07-07	NOTEST	0	0	0	0	1	1	no
Glyma01g39240	Glyma01g39240	Glyma01g39240	Gm01:51218796-51220209	14-7-0	2014-07-07	OK	2.82665	4.69462	0.731915	-1.02562	0.305071	0.698441	no
Glyma01g39250	Glyma01g39250	Glyma01g39250	Gm01:51223239-51226456	14-7-0	2014-07-07	OK	6.19033	6.88973	0.15443	-0.163449	0.870165	0.970268	no
Glyma01g39260	Glyma01g39260	Glyma01g39260	Gm01:51227462-51229777	14-7-0	2014-07-07	OK	3.21315	0.952524	-1.75416	2.2082	0.0272305	0.19447	no
Glyma01g39270	Glyma01g39270	Glyma01g39270	Gm01:51234092-51236207	14-7-0	2014-07-07	OK	100.923	70.2309	-0.523079	0.784644	0.432662	0.796628	no
Glyma01g39280	Glyma01g39280	Glyma01g39280	Gm01:51241780-51246700	14-7-0	2014-07-07	OK	22.5869	14.2894	-0.660542	1.09186	0.274893	0.666318	no
Glyma01g39290	Glyma01g39290	Glyma01g39290	Gm01:51259529-51261619	14-7-0	2014-07-07	OK	3.49257	3.0412	-0.199649	0.302961	0.76192	0.94198	no
Glyma01g39300	Glyma01g39300	Glyma01g39300	Gm01:51273336-51279506	14-7-0	2014-07-07	NOTEST	0	0	0	0	1	1	no
Glyma01g39306	Glyma01g39306	Glyma01g39306	Gm01:51273336-51279506	14-7-0	2014-07-07	NOTEST	0	0	0	0	1	1	no
Glyma01g39313	Glyma01g39313	Glyma01g39313	Gm01:51280851-51284021	14-7-0	2014-07-07	NOTEST	0	0	0	0	1	1	no
Glyma01g39320	Glyma01g39320	Glyma01g39320	Gm01:51287475-51290552	14-7-0	2014-07-07	OK	2.99773	3.65684	0.286725	-0.424491	0.671208	0.915213	no
Glyma01g39330	Glyma01g39330	Glyma01g39330	Gm01:51290922-51295650	14-7-0	2014-07-07	OK	9.55155	12.7603	0.417851	-0.706182	0.480075	0.824325	no
Glyma01g39340	Glyma01g39340	Glyma01g39340	Gm01:51296877-51297857	14-7-0	2014-07-07	OK	1.64154	0.426294	-1.94512	1.71357	0.086607	0.377493	no
Glyma01g39350	Glyma01g39350	Glyma01g39350	Gm01:51298441-51305321	14-7-0	2014-07-07	OK	20.9564	18.0374	-0.216398	0.362771	0.716776	0.929006	no
Glyma01g39360	Glyma01g39360	Glyma01g39360	Gm01:51314677-51315832	14-7-0	2014-07-07	NOTEST	0	0	0	0	1	1	no
Glyma01g39370	Glyma01g39370	Glyma01g39370	Gm01:51321188-51322374	14-7-0	2014-07-07	OK	3.09584	26.2747	3.08527	-4.45719	8.3042e-06	0.000606187	yes
Glyma01g39380	Glyma01g39380	Glyma01g39380	Gm01:51332253-51333769	14-7-0	2014-07-07	NOTEST	0	0	0	0	1	1	no
Glyma01g39391	Glyma01g39391	Glyma01g39391	Gm01:51334950-51335823	14-7-0	2014-07-07	NOTEST	0	0	0	0	1	1	no
Glyma01g39401	Glyma01g39401	Glyma01g39401	Gm01:51345282-51346122	14-7-0	2014-07-07	NOTEST	0	0	0	0	1	1	no
Glyma01g39410	Glyma01g39410	Glyma01g39410	Gm01:51349990-51355206	14-7-0	2014-07-07	OK	5.94369	12.9316	1.12147	-1.71376	0.0865721	0.377465	no
Glyma01g39420	Glyma01g39420	Glyma01g39420	Gm01:51355206-51358366	14-7-0	2014-07-07	OK	3.20742	5.00347	0.641516	-1.01349	0.310828	0.704058	no
Glyma01g39430	Glyma01g39430	Glyma01g39430	Gm01:51363128-51376630	14-7-0	2014-07-07	OK	0.860101	0.736331	-0.22415	0.31603	0.75198	0.938662	no
Glyma01g39440	Glyma01g39440	Glyma01g39440	Gm01:51376879-51383234	14-7-0	2014-07-07	NOTEST	0	0	0	0	1	1	no
Glyma01g39451	Glyma01g39451	Glyma01g39451	Gm01:51385174-51388582	14-7-0	2014-07-07	NOTEST	0.101307	0.0336061	-1.59194	0.861833	0.388779	1	no
Glyma01g39460	Glyma01g39460	Glyma01g39460	Gm01:51397147-51399175	14-7-0	2014-07-07	OK	0	1.64422	1.79769e+308	1.79769e+308	0.0115011	0.116412	no
Glyma01g39470	Glyma01g39470	Glyma01g39470	Gm01:51403228-51406259	14-7-0	2014-07-07	OK	1.54803	2.2617	0.54697	-0.612523	0.540192	0.859112	no
Glyma01g39480	Glyma01g39480	Glyma01g39480	Gm01:51407024-51411165	14-7-0	2014-07-07	NOTEST	0.0388724	0.232774	2.58211	-1.664	0.0961119	1	no
Glyma01g39490	Glyma01g39490	Glyma01g39490	Gm01:51412886-51422885	14-7-0	2014-07-07	OK	1.39405	1.85464	0.41186	-0.599691	0.548712	0.86307	no
Glyma01g39500	Glyma01g39500	Glyma01g39500	Gm01:51428871-51431363	14-7-0	2014-07-07	OK	76.9657	51.2746	-0.585971	0.914136	0.360646	0.746038	no
Glyma01g39510	Glyma01g39510	Glyma01g39510	Gm01:51431925-51439061	14-7-0	2014-07-07	OK	0.560655	1.2494	1.15605	-1.48864	0.136583	0.481916	no
Glyma01g39520	Glyma01g39520	Glyma01g39520	Gm01:51456457-51460406	14-7-0	2014-07-07	OK	4.97185	5.72295	0.202975	-0.278407	0.7807	0.947747	no
Glyma01g39530	Glyma01g39530	Glyma01g39530	Gm01:51483951-51489283	14-7-0	2014-07-07	OK	175.228	252.461	0.526826	-0.702883	0.482129	0.826051	no
Glyma01g39540	Glyma01g39540	Glyma01g39540	Gm01:51490230-51491823	14-7-0	2014-07-07	OK	31.3506	14.7476	-1.08801	1.80855	0.0705216	0.334953	no
Glyma01g39560	Glyma01g39560	Glyma01g39560	Gm01:51508290-51512259	14-7-0	2014-07-07	OK	7.85011	7.5847	-0.04962	0.0740068	0.941005	0.988177	no
Glyma01g39570	Glyma01g39570	Glyma01g39570	Gm01:51516172-51517312	14-7-0	2014-07-07	OK	1.42129	0.463307	-1.61716	1.6263	0.103886	0.415168	no
Glyma01g39580	Glyma01g39580	Glyma01g39580	Gm01:51518038-51522362	14-7-0	2014-07-07	OK	9.50781	13.9315	0.551167	-0.914197	0.360613	0.746038	no
Glyma01g39590	Glyma01g39590	Glyma01g39590	Gm01:51527348-51528891	14-7-0	2014-07-07	OK	0.122444	0.599362	2.2913	-1.92063	0.0547779	0.290269	no
Glyma01g39600	Glyma01g39600	Glyma01g39600	Gm01:51531989-51534998	14-7-0	2014-07-07	OK	5.54007	3.45252	-0.682253	0.989174	0.322578	0.713558	no
Glyma01g39610	Glyma01g39610	Glyma01g39610	Gm01:51545785-51549819	14-7-0	2014-07-07	OK	0.932218	1.66041	0.832797	-1.06621	0.286328	0.679803	no
Glyma01g39630	Glyma01g39630	Glyma01g39630	Gm01:51555027-51556605	14-7-0	2014-07-07	NOTEST	0.172489	0.566035	1.71438	-1.50036	0.133522	1	no
Glyma01g39640	Glyma01g39640	Glyma01g39640	Gm01:51557943-51560354	14-7-0	2014-07-07	OK	4.03987	7.16923	0.827509	-1.19671	0.23142	0.615514	no
Glyma01g39650	Glyma01g39650	Glyma01g39650	Gm01:51565663-51573461	14-7-0	2014-07-07	OK	2.33118	2.62412	0.170774	-0.253749	0.79969	0.952092	no
Glyma01g39660	Glyma01g39660	Glyma01g39660	Gm01:51574045-51576407	14-7-0	2014-07-07	OK	1.01742	0.768254	-0.405267	0.475585	0.63437	0.902387	no
Glyma01g39690	Glyma01g39690	Glyma01g39690	Gm01:51579270-51581490	14-7-0	2014-07-07	NOTEST	0.0487834	0.462304	3.24438	-2.14088	0.032284	1	no
Glyma01g39700	Glyma01g39700	Glyma01g39700	Gm01:51584479-51586969	14-7-0	2014-07-07	OK	3.43217	4.61039	0.425765	-0.51928	0.603565	0.89053	no
Glyma01g39710	Glyma01g39710	Glyma01g39710	Gm01:51587208-51587971	14-7-0	2014-07-07	NOTEST	0.589366	0.232822	-1.33994	0.957731	0.338198	1	no
Glyma01g39720	Glyma01g39720	Glyma01g39720	Gm01:51588563-51590809	14-7-0	2014-07-07	NOTEST	0.0983469	0.177366	0.850775	-0.659779	0.509396	1	no
Glyma01g39740	Glyma01g39740	Glyma01g39740	Gm01:51613142-51614901	14-7-0	2014-07-07	OK	12.0552	13.564	0.170131	-0.28756	0.773683	0.94608	no
Glyma01g39750	Glyma01g39750	Glyma01g39750	Gm01:51624486-51625983	14-7-0	2014-07-07	NOTEST	0.305431	0.569624	0.899165	-0.597436	0.550216	1	no
Glyma01g39760	Glyma01g39760	Glyma01g39760	Gm01:51627630-51629200	14-7-0	2014-07-07	NOTEST	0	0.0919274	1.79769e+308	1.79769e+308	0.0980491	1	no
Glyma01g39770	Glyma01g39770	Glyma01g39770	Gm01:51633199-51634269	14-7-0	2014-07-07	OK	10.9563	12.7865	0.222863	-0.344785	0.730256	0.933108	no
Glyma01g39780	Glyma01g39780	Glyma01g39780	Gm01:51645378-51647678	14-7-0	2014-07-07	NOTEST	0	0	0	0	1	1	no
Glyma01g39790	Glyma01g39790	Glyma01g39790	Gm01:51653322-51656914	14-7-0	2014-07-07	OK	19.2073	15.8249	-0.279451	0.469169	0.638949	0.905162	no
Glyma01g39800	Glyma01g39800	Glyma01g39800	Gm01:51659391-51665037	14-7-0	2014-07-07	OK	1.50021	1.21039	-0.309691	0.383157	0.701604	0.924206	no
Glyma01g39810	Glyma01g39810	Glyma01g39810	Gm01:51668222-51670161	14-7-0	2014-07-07	OK	24.6404	28.4449	0.207141	-0.347593	0.728146	0.932472	no
Glyma01g39820	Glyma01g39820	Glyma01g39820	Gm01:51675929-51677501	14-7-0	2014-07-07	NOTEST	0	0	0	0	1	1	no
Glyma01g39830	Glyma01g39830	Glyma01g39830	Gm01:51679882-51690594	14-7-0	2014-07-07	OK	1.93651	2.55625	0.400568	-0.582413	0.560289	0.869977	no
Glyma01g39850	Glyma01g39850	Glyma01g39850	Gm01:51698415-51700257	14-7-0	2014-07-07	OK	1.82496	64.1272	5.135	-7.0548	1.7284e-12	2.35486e-09	yes
Glyma01g39860	Glyma01g39860	Glyma01g39860	Gm01:51704330-51708072	14-7-0	2014-07-07	NOTEST	0.262874	0.559058	1.08862	-1.00607	0.31438	1	no
Glyma01g39870	Glyma01g39870	Glyma01g39870	Gm01:51714716-51716494	14-7-0	2014-07-07	NOTEST	0.0460094	0.169228	1.87897	-1.1827	0.23693	1	no
Glyma01g39880	Glyma01g39880	Glyma01g39880	Gm01:51721226-51730602	14-7-0	2014-07-07	NOTEST	0.312735	0.42759	0.451291	-0.0905725	0.927832	1	no
Glyma01g39890	Glyma01g39890	Glyma01g39890	Gm01:51721226-51730602	14-7-0	2014-07-07	OK	43.1689	17.6883	-1.28719	2.07629	0.0378675	0.233409	no
Glyma01g39900	Glyma01g39900	Glyma01g39900	Gm01:51730921-51747255	14-7-0	2014-07-07	NOTEST	0	0.0604005	1.79769e+308	1.79769e+308	0.366501	1	no
Glyma01g39910	Glyma01g39910	Glyma01g39910	Gm01:51730921-51747255	14-7-0	2014-07-07	OK	1.71997	1.75484	0.0289538	-0.0302107	0.975899	0.995201	no
Glyma01g39920	Glyma01g39920	Glyma01g39920	Gm01:51750715-51754579	14-7-0	2014-07-07	OK	1.27595	2.02063	0.663227	-0.711524	0.47676	0.822713	no
Glyma01g39935	Glyma01g39935	Glyma01g39935	Gm01:51755461-51757387	14-7-0	2014-07-07	OK	13.1427	22.1038	0.750029	-1.25271	0.21031	0.589125	no
Glyma01g39950	Glyma01g39950	Glyma01g39950	Gm01:51758052-51764933	14-7-0	2014-07-07	OK	6.52627	18.1071	1.47223	-2.46204	0.0138151	0.131312	no
Glyma01g39960	Glyma01g39960	Glyma01g39960	Gm01:51768697-51773656	14-7-0	2014-07-07	OK	12.9087	19.5086	0.595763	-0.986593	0.323842	0.714403	no
Glyma01g39970	Glyma01g39970	Glyma01g39970	Gm01:51778756-51782898	14-7-0	2014-07-07	OK	10.9702	7.68446	-0.513575	0.866223	0.386368	0.765224	no
Glyma01g39981	Glyma01g39981	Glyma01g39981	Gm01:51784287-51787179	14-7-0	2014-07-07	OK	2.12501	1.45373	-0.547713	0.49394	0.621349	0.897989	no
Glyma01g39990	Glyma01g39990	Glyma01g39990	Gm01:51795376-51797766	14-7-0	2014-07-07	OK	0.469753	3.57884	2.92952	-3.27295	0.00106432	0.0235602	yes
Glyma01g40010	Glyma01g40010	Glyma01g40010	Gm01:51813387-51815770	14-7-0	2014-07-07	OK	26.8135	1.79973	-3.89711	5.73281	9.87801e-09	2.94029e-06	yes
Glyma01g40030	Glyma01g40030	Glyma01g40030	Gm01:51830579-51838128	14-7-0	2014-07-07	OK	0.312854	5.42488	4.11603	-0.827934	0.407708	0.779409	no
Glyma01g40041	Glyma01g40041	Glyma01g40041	Gm01:51830579-51838128	14-7-0	2014-07-07	OK	3.71229	2.96735	-0.323136	0.48772	0.625748	0.899646	no
Glyma01g40050	Glyma01g40050	Glyma01g40050	Gm01:51861767-51863943	14-7-0	2014-07-07	NOTEST	0.130307	0.211316	0.697486	-0.579697	0.562119	1	no
Glyma01g40060	Glyma01g40060	Glyma01g40060	Gm01:51873281-51875272	14-7-0	2014-07-07	NOTEST	0.0522087	0	-1.79769e+308	-1.79769e+308	0.139932	1	no
Glyma01g40080	Glyma01g40080	Glyma01g40080	Gm01:51889805-51895295	14-7-0	2014-07-07	OK	2.83205	1.09696	-1.36833	2.04775	0.040585	0.244075	no
Glyma01g40090	Glyma01g40090	Glyma01g40090	Gm01:51899586-51905304	14-7-0	2014-07-07	OK	4.40037	0.60791	-2.8557	2.6738	0.00749973	0.0874275	no
Glyma01g40100	Glyma01g40100	Glyma01g40100	Gm01:51910087-51912612	14-7-0	2014-07-07	NOTEST	0.381479	0.129046	-1.56372	1.3611	0.173482	1	no
Glyma01g40110	Glyma01g40110	Glyma01g40110	Gm01:51918737-51926979	14-7-0	2014-07-07	NOTEST	0.0268757	0.0429043	0.67482	-0.312735	0.754482	1	no
Glyma01g40130	Glyma01g40130	Glyma01g40130	Gm01:51926992-51932894	14-7-0	2014-07-07	OK	3.1375	8.10448	1.3691	-2.28689	0.0222023	0.172155	no
Glyma01g40140	Glyma01g40140	Glyma01g40140	Gm01:51939465-51943260	14-7-0	2014-07-07	OK	14.885	19.4213	0.383775	-0.647821	0.517101	0.846477	no
Glyma01g40150	Glyma01g40150	Glyma01g40150	Gm01:51946620-51947536	14-7-0	2014-07-07	OK	40.3031	44.999	0.159001	-0.266248	0.790048	0.949922	no
Glyma01g40161	Glyma01g40161	Glyma01g40161	Gm01:51948401-51952638	14-7-0	2014-07-07	OK	0.0902765	1.78741	4.30738	-3.91153	9.17141e-05	0.00393818	yes
Glyma01g40170	Glyma01g40170	Glyma01g40170	Gm01:51956944-51961922	14-7-0	2014-07-07	OK	3.7609	3.07745	-0.289341	0.454334	0.649589	0.908313	no
Glyma01g40180	Glyma01g40180	Glyma01g40180	Gm01:51965657-51969274	14-7-0	2014-07-07	OK	1.20584	2.00259	0.731821	-0.945743	0.34428	0.732344	no
Glyma01g40190	Glyma01g40190	Glyma01g40190	Gm01:51969918-51974115	14-7-0	2014-07-07	OK	1.0171	2.0025	0.977342	-1.26361	0.20637	0.584649	no
[truncated: 52,176 more rows]
