# Supplementary material for: Overexpression of a Cinnamyl Alcohol Dehydrogenase-Coding Gene, GsCAD1, from Wild Soybean Enhances Resistance to Soybean Mosaic Virus
Source: MDPI journal article supplement (doi:10.3390/ijms232315206), 2022-12-02
Supplement: s1 [file s1 › Table S6 R-1-0D-vs-14D.xlsx]

## Sheet: Sheet1
test_id	gene_id	gene	locus	sample_1	sample_2	status	value_1	value_2	log2(fold_change)	test_stat	p_value	q_value	significant
Glyma0002s50	Glyma0002s50	Glyma0002s50	Gm02:2248-17672	14-7-0	14-7-14	OK	2.46176	2.75681	0.163312	-0.23248	0.816165	0.940976	no
Glyma0003s50	Glyma0003s50	Glyma0003s50	Gm03:8648-28244	14-7-0	14-7-14	OK	5.22734	4.78776	-0.126728	0.171208	0.86406	0.958884	no
Glyma0005s50	Glyma0005s50	Glyma0005s50	Gm05:16184-21667	14-7-0	14-7-14	OK	0.617929	1.03546	0.744758	-0.656325	0.511615	0.797297	no
Glyma0006s50	Glyma0006s50	Glyma0006s50	Gm06:1757-15096	14-7-0	14-7-14	OK	6.96315	6.77697	-0.0391015	0.0553965	0.955823	0.987467	no
Glyma0007s50	Glyma0007s50	Glyma0007s50	Gm07:1209-3554	14-7-0	14-7-14	NOTEST	0	0	0	0	1	1	no
Glyma0010s50	Glyma0010s50	Glyma0010s50	Gm10:10493-13224	14-7-0	14-7-14	NOTEST	0.0121302	0.0578391	2.25345	-0.604891	0.545252	1	no
Glyma0011s50	Glyma0011s50	Glyma0011s50	Gm11:1119-5508	14-7-0	14-7-14	NOTEST	0.279125	0.165976	-0.749933	0.618259	0.536405	1	no
Glyma0015s50	Glyma0015s50	Glyma0015s50	Gm15:626-2726	14-7-0	14-7-14	NOTEST	0	0	0	0	1	1	no
Glyma0017s50	Glyma0017s50	Glyma0017s50	Gm17:405-1845	14-7-0	14-7-14	OK	0.792649	0.861957	0.120934	-0.0922529	0.926497	0.977547	no
Glyma0018s50	Glyma0018s50	Glyma0018s50	Gm18:2484-40137	14-7-0	14-7-14	OK	2.65936	4.32342	0.701097	-0.987587	0.323355	0.654374	no
Glyma0021s00410	Glyma0021s00410	Glyma0021s00410	scaffold_21:663659-664067	14-7-0	14-7-14	NOTEST	0	0	0	0	1	1	no
Glyma0021s00426	Glyma0021s00426	Glyma0021s00426	scaffold_21:684712-690812	14-7-0	14-7-14	NOTEST	0	0	0	0	1	1	no
Glyma0021s00443	Glyma0021s00443	Glyma0021s00443	scaffold_21:692299-694156	14-7-0	14-7-14	NOTEST	0	0.454444	1.79769e+308	1.79769e+308	0.0777245	1	no
Glyma0021s00460	Glyma0021s00460	Glyma0021s00460	scaffold_21:716657-721100	14-7-0	14-7-14	OK	1.04106	1.30871	0.330095	-0.29561	0.767528	0.923054	no
Glyma0022s00200	Glyma0022s00200	Glyma0022s00200	scaffold_22:543542-558386	14-7-0	14-7-14	NOTEST	0.0741358	0.0642236	-0.207068	0.118936	0.905326	1	no
Glyma0022s00273	Glyma0022s00273	Glyma0022s00273	scaffold_22:561854-563467	14-7-0	14-7-14	NOTEST	0	0	0	0	1	1	no
Glyma0022s00346	Glyma0022s00346	Glyma0022s00346	scaffold_22:563726-567494	14-7-0	14-7-14	NOTEST	0	0	0	0	1	1	no
Glyma0022s00420	Glyma0022s00420	Glyma0022s00420	scaffold_22:722866-725638	14-7-0	14-7-14	OK	8.13538	8.8921	0.128314	-0.182682	0.855047	0.956015	no
Glyma0022s00430	Glyma0022s00430	Glyma0022s00430	scaffold_22:728729-731634	14-7-0	14-7-14	OK	0	1.55406	1.79769e+308	1.79769e+308	0.0722091	0.293823	no
Glyma0022s00443	Glyma0022s00443	Glyma0022s00443	scaffold_22:800491-802362	14-7-0	14-7-14	NOTEST	0	0	0	0	1	1	no
Glyma0022s00456	Glyma0022s00456	Glyma0022s00456	scaffold_22:942964-948274	14-7-0	14-7-14	OK	5.30259	4.68459	-0.178777	0.149984	0.880777	0.963395	no
Glyma0022s00470	Glyma0022s00470	Glyma0022s00470	scaffold_22:942964-948274	14-7-0	14-7-14	OK	0.629567	0.413103	-0.607858	0.116523	0.907238	0.971835	no
Glyma0022s00480	Glyma0022s00480	Glyma0022s00480	scaffold_22:952859-956925	14-7-0	14-7-14	OK	0.948783	0.868091	-0.128231	0.123606	0.901627	0.970484	no
Glyma0023s00410	Glyma0023s00410	Glyma0023s00410	scaffold_23:476540-479148	14-7-0	14-7-14	OK	2.30131	1.64512	-0.484265	0.547807	0.583825	0.838454	no
Glyma0023s00515	Glyma0023s00515	Glyma0023s00515	scaffold_23:689759-693471	14-7-0	14-7-14	OK	0.919446	1.80029	0.96939	-0.891886	0.372454	0.698175	no
Glyma0023s00620	Glyma0023s00620	Glyma0023s00620	scaffold_23:694208-709536	14-7-0	14-7-14	OK	7.43721	3.11383	-1.25607	1.45398	0.145953	0.43791	no
Glyma0023s00670	Glyma0023s00670	Glyma0023s00670	scaffold_23:882926-883789	14-7-0	14-7-14	NOTEST	0	0	0	0	1	1	no
Glyma0024s00230	Glyma0024s00230	Glyma0024s00230	scaffold_24:8124-13007	14-7-0	14-7-14	OK	3.54225	4.88811	0.464612	-0.55648	0.577883	0.834986	no
Glyma0024s00245	Glyma0024s00245	Glyma0024s00245	scaffold_24:191608-197085	14-7-0	14-7-14	NOTEST	0	0	0	0	1	1	no
Glyma0024s00260	Glyma0024s00260	Glyma0024s00260	scaffold_24:201620-211808	14-7-0	14-7-14	OK	3.96764	6.61896	0.738325	-0.912132	0.361699	0.687881	no
Glyma0028s00210	Glyma0028s00210	Glyma0028s00210	scaffold_28:233807-247417	14-7-0	14-7-14	OK	9.71219	10.711	0.141232	-0.194814	0.845539	0.951897	no
Glyma0028s00260	Glyma0028s00260	Glyma0028s00260	scaffold_28:250538-253655	14-7-0	14-7-14	NOTEST	0	0	0	0	1	1	no
Glyma0041s00210	Glyma0041s00210	Glyma0041s00210	scaffold_41:27189-31640	14-7-0	14-7-14	OK	2.62325	8.98186	1.77566	-2.46117	0.0138485	0.117389	no
Glyma0041s00225	Glyma0041s00225	Glyma0041s00225	scaffold_41:41035-42513	14-7-0	14-7-14	NOTEST	0	0	0	0	1	1	no
Glyma0041s00240	Glyma0041s00240	Glyma0041s00240	scaffold_41:45959-49258	14-7-0	14-7-14	OK	0.0980296	6.76475	6.10868	-4.95403	7.26913e-07	9.35915e-05	yes
Glyma0041s00260	Glyma0041s00260	Glyma0041s00260	scaffold_41:61732-66813	14-7-0	14-7-14	OK	1.98432	5.51712	1.47527	-1.64515	0.0999396	0.354713	no
Glyma0041s00271	Glyma0041s00271	Glyma0041s00271	scaffold_41:70024-73638	14-7-0	14-7-14	OK	2.07679	2.09908	0.0154035	-0.0163224	0.986977	0.995961	no
Glyma0041s00280	Glyma0041s00280	Glyma0041s00280	scaffold_41:74056-78241	14-7-0	14-7-14	OK	3.16974	8.90399	1.49009	-1.89097	0.058629	0.261147	no
Glyma0041s00290	Glyma0041s00290	Glyma0041s00290	scaffold_41:85372-94695	14-7-0	14-7-14	OK	4.47456	2.66771	-0.746143	1.01604	0.309609	0.640994	no
Glyma0041s00300	Glyma0041s00300	Glyma0041s00300	scaffold_41:96315-98827	14-7-0	14-7-14	OK	14.8061	12.2071	-0.27847	0.392624	0.694597	0.89122	no
Glyma0041s00310	Glyma0041s00310	Glyma0041s00310	scaffold_41:111899-114096	14-7-0	14-7-14	OK	0.131427	0.999968	2.92762	-2.25853	0.0239123	0.162141	no
Glyma0041s00331	Glyma0041s00331	Glyma0041s00331	scaffold_41:122453-123227	14-7-0	14-7-14	NOTEST	0	0	0	0	1	1	no
Glyma0041s00350	Glyma0041s00350	Glyma0041s00350	scaffold_41:149673-152360	14-7-0	14-7-14	NOTEST	0	0.107358	1.79769e+308	1.79769e+308	0.0777245	1	no
Glyma0041s00360	Glyma0041s00360	Glyma0041s00360	scaffold_41:165449-171887	14-7-0	14-7-14	NOTEST	0	0	0	0	1	1	no
Glyma0041s50	Glyma0041s50	Glyma0041s50	scaffold_41:4320-9458	14-7-0	14-7-14	NOTEST	0.133341	0.171208	0.360634	-0.312375	0.754756	1	no
Glyma0042s100	Glyma0042s100	Glyma0042s100	scaffold_42:281628-284115	14-7-0	14-7-14	OK	0.741065	1.3817	0.898771	-0.750606	0.45289	0.759531	no
Glyma0042s50	Glyma0042s50	Glyma0042s50	scaffold_42:265872-271658	14-7-0	14-7-14	NOTEST	0	0	0	0	1	1	no
Glyma0048s00220	Glyma0048s00220	Glyma0048s00220	scaffold_48:756-13042	14-7-0	14-7-14	NOTEST	0	0.0238171	1.79769e+308	1.79769e+308	0.393537	1	no
Glyma0048s00230	Glyma0048s00230	Glyma0048s00230	scaffold_48:13316-18869	14-7-0	14-7-14	OK	3.32156	2.24793	-0.563263	0.200226	0.841304	0.950434	no
Glyma0048s00240	Glyma0048s00240	Glyma0048s00240	scaffold_48:13316-18869	14-7-0	14-7-14	OK	2.34653	3.4097	0.539118	-0.686695	0.492275	0.785556	no
Glyma0048s00250	Glyma0048s00250	Glyma0048s00250	scaffold_48:24012-27245	14-7-0	14-7-14	OK	30.6543	26.3457	-0.218521	0.299308	0.764705	0.922401	no
Glyma0048s00260	Glyma0048s00260	Glyma0048s00260	scaffold_48:30256-31906	14-7-0	14-7-14	OK	0.758244	1.23795	0.707218	-0.696023	0.486415	0.782143	no
Glyma0048s00270	Glyma0048s00270	Glyma0048s00270	scaffold_48:32191-38154	14-7-0	14-7-14	OK	17.656	4.4386	-1.99198	2.71771	0.00657347	0.074636	no
Glyma0048s00280	Glyma0048s00280	Glyma0048s00280	scaffold_48:41005-46815	14-7-0	14-7-14	OK	4.89617	6.45145	0.397972	-0.456592	0.647964	0.869712	no
Glyma0048s00290	Glyma0048s00290	Glyma0048s00290	scaffold_48:51746-58457	14-7-0	14-7-14	OK	16.3234	14.4251	-0.178366	0.253392	0.799966	0.935467	no
Glyma0048s00300	Glyma0048s00300	Glyma0048s00300	scaffold_48:62047-65487	14-7-0	14-7-14	OK	43.9927	21.3215	-1.04495	1.21897	0.222854	0.547768	no
Glyma0048s00305	Glyma0048s00305	Glyma0048s00305	scaffold_48:62047-65487	14-7-0	14-7-14	OK	4.79655	1.61864	-1.56722	0.480736	0.630704	0.861606	no
Glyma0048s00310	Glyma0048s00310	Glyma0048s00310	scaffold_48:73905-75284	14-7-0	14-7-14	NOTEST	0	0.235489	1.79769e+308	1.79769e+308	0.0431285	1	no
Glyma0048s00320	Glyma0048s00320	Glyma0048s00320	scaffold_48:78264-89175	14-7-0	14-7-14	OK	2.36958	2.80794	0.244881	-0.291632	0.770568	0.924427	no
Glyma0048s00330	Glyma0048s00330	Glyma0048s00330	scaffold_48:92831-93821	14-7-0	14-7-14	OK	6.63312	14.4936	1.12766	-1.49378	0.135232	0.41995	no
Glyma0048s00340	Glyma0048s00340	Glyma0048s00340	scaffold_48:93959-105291	14-7-0	14-7-14	OK	4.13303	4.6435	0.168014	-0.236686	0.812901	0.939646	no
Glyma0048s00350	Glyma0048s00350	Glyma0048s00350	scaffold_48:115208-118892	14-7-0	14-7-14	NOTEST	0	0	0	0	1	1	no
Glyma0048s50	Glyma0048s50	Glyma0048s50	scaffold_48:756-13042	14-7-0	14-7-14	OK	1.74869	0.72256	-1.27509	1.37219	0.170005	0.475936	no
Glyma0053s100	Glyma0053s100	Glyma0053s100	scaffold_53:40277-44576	14-7-0	14-7-14	NOTEST	0	0	0	0	1	1	no
Glyma0053s150	Glyma0053s150	Glyma0053s150	scaffold_53:60537-64721	14-7-0	14-7-14	NOTEST	0	0	0	0	1	1	no
Glyma0053s200	Glyma0053s200	Glyma0053s200	scaffold_53:96299-97317	14-7-0	14-7-14	NOTEST	0	0	0	0	1	1	no
Glyma0053s50	Glyma0053s50	Glyma0053s50	scaffold_53:1663-6177	14-7-0	14-7-14	NOTEST	0	0	0	0	1	1	no
Glyma0057s100	Glyma0057s100	Glyma0057s100	scaffold_57:113347-115364	14-7-0	14-7-14	OK	1.01243	0.600467	-0.753658	0.581748	0.560736	0.824884	no
Glyma0057s50	Glyma0057s50	Glyma0057s50	scaffold_57:98459-99986	14-7-0	14-7-14	NOTEST	0	0	0	0	1	1	no
Glyma0060s00220	Glyma0060s00220	Glyma0060s00220	scaffold_60:12548-13243	14-7-0	14-7-14	NOTEST	0	0	0	0	1	1	no
Glyma0060s00320	Glyma0060s00320	Glyma0060s00320	scaffold_60:67387-68707	14-7-0	14-7-14	NOTEST	0	0	0	0	1	1	no
Glyma0060s00370	Glyma0060s00370	Glyma0060s00370	scaffold_60:104356-106210	14-7-0	14-7-14	NOTEST	0	0	0	0	1	1	no
Glyma0066s50	Glyma0066s50	Glyma0066s50	scaffold_66:161914-164286	14-7-0	14-7-14	NOTEST	0	0	0	0	1	1	no
Glyma0067s50	Glyma0067s50	Glyma0067s50	scaffold_67:44433-45302	14-7-0	14-7-14	NOTEST	0	0	0	0	1	1	no
Glyma0070s50	Glyma0070s50	Glyma0070s50	scaffold_70:35574-40055	14-7-0	14-7-14	OK	0.591402	1.6872	1.51242	-1.41569	0.156866	0.455627	no
Glyma0079s00200	Glyma0079s00200	Glyma0079s00200	scaffold_79:9482-9737	14-7-0	14-7-14	NOTEST	0	0	0	0	1	1	no
Glyma0079s00210	Glyma0079s00210	Glyma0079s00210	scaffold_79:16304-17051	14-7-0	14-7-14	OK	0.168771	0.582691	1.78767	-1.25749	0.208576	0.529015	no
Glyma0079s00220	Glyma0079s00220	Glyma0079s00220	scaffold_79:17736-18009	14-7-0	14-7-14	OK	0	0.609235	1.79769e+308	1.79769e+308	0.223676	0.547768	no
Glyma0079s00230	Glyma0079s00230	Glyma0079s00230	scaffold_79:18723-19596	14-7-0	14-7-14	NOTEST	0	0	0	0	1	1	no
Glyma0079s00240	Glyma0079s00240	Glyma0079s00240	scaffold_79:20660-20912	14-7-0	14-7-14	NOTEST	0	0	0	0	1	1	no
Glyma0079s00250	Glyma0079s00250	Glyma0079s00250	scaffold_79:20961-21240	14-7-0	14-7-14	OK	0.974546	0	-1.79769e+308	-1.79769e+308	0.0965277	0.346781	no
Glyma0079s00261	Glyma0079s00261	Glyma0079s00261	scaffold_79:22053-22326	14-7-0	14-7-14	NOTEST	0	0	0	0	1	1	no
Glyma0079s00270	Glyma0079s00270	Glyma0079s00270	scaffold_79:25288-26862	14-7-0	14-7-14	NOTEST	0.16599	0	-1.79769e+308	-1.79769e+308	0.0651685	1	no
Glyma0079s00280	Glyma0079s00280	Glyma0079s00280	scaffold_79:27077-28537	14-7-0	14-7-14	NOTEST	0	0	0	0	1	1	no
Glyma0079s00290	Glyma0079s00290	Glyma0079s00290	scaffold_79:30187-34025	14-7-0	14-7-14	NOTEST	0.0582097	0.0501263	-0.215692	0.1559	0.876112	1	no
Glyma0079s00295	Glyma0079s00295	Glyma0079s00295	scaffold_79:54681-55767	14-7-0	14-7-14	NOTEST	0.0627754	0.0534447	-0.232153	0.105302	0.916137	1	no
Glyma0079s00300	Glyma0079s00300	Glyma0079s00300	scaffold_79:56320-57461	14-7-0	14-7-14	NOTEST	0	0	0	0	1	1	no
Glyma0079s00311	Glyma0079s00311	Glyma0079s00311	scaffold_79:123336-123591	14-7-0	14-7-14	NOTEST	0	0	0	0	1	1	no
Glyma0079s00320	Glyma0079s00320	Glyma0079s00320	scaffold_79:127744-128017	14-7-0	14-7-14	NOTEST	0	0	0	0	1	1	no
Glyma0079s00330	Glyma0079s00330	Glyma0079s00330	scaffold_79:128776-129055	14-7-0	14-7-14	NOTEST	0.327672	0.491032	0.583567	-0.216125	0.82889	1	no
Glyma0079s00340	Glyma0079s00340	Glyma0079s00340	scaffold_79:161645-161951	14-7-0	14-7-14	NOTEST	0	0	0	0	1	1	no
Glyma0079s00350	Glyma0079s00350	Glyma0079s00350	scaffold_79:164291-164540	14-7-0	14-7-14	NOTEST	0	0.219219	1.79769e+308	1.79769e+308	0.352003	1	no
Glyma0079s00360	Glyma0079s00360	Glyma0079s00360	scaffold_79:165133-166200	14-7-0	14-7-14	NOTEST	0.100723	0.114724	0.187773	-0.110843	0.911741	1	no
Glyma0079s00370	Glyma0079s00370	Glyma0079s00370	scaffold_79:167220-167502	14-7-0	14-7-14	NOTEST	0	0	0	0	1	1	no
Glyma0080s50	Glyma0080s50	Glyma0080s50	scaffold_80:33970-43733	14-7-0	14-7-14	NOTEST	0.0668495	0.0267245	-1.32275	0.601649	0.547408	1	no
Glyma0084s00210	Glyma0084s00210	Glyma0084s00210	scaffold_84:12274-20446	14-7-0	14-7-14	OK	62.6978	103.54	0.723703	-0.84718	0.396895	0.718457	no
Glyma0084s00230	Glyma0084s00230	Glyma0084s00230	scaffold_84:53420-54224	14-7-0	14-7-14	NOTEST	0	0	0	0	1	1	no
Glyma0086s00200	Glyma0086s00200	Glyma0086s00200	scaffold_86:18942-19924	14-7-0	14-7-14	NOTEST	0	0	0	0	1	1	no
Glyma0086s00250	Glyma0086s00250	Glyma0086s00250	scaffold_86:40393-43241	14-7-0	14-7-14	NOTEST	0	0	0	0	1	1	no
Glyma0086s00300	Glyma0086s00300	Glyma0086s00300	scaffold_86:91106-93419	14-7-0	14-7-14	NOTEST	0	0	0	0	1	1	no
Glyma0090s00200	Glyma0090s00200	Glyma0090s00200	scaffold_90:4631-8816	14-7-0	14-7-14	NOTEST	0.205409	0.405526	0.981298	-0.911791	0.361879	1	no
Glyma0090s00250	Glyma0090s00250	Glyma0090s00250	scaffold_90:22827-24762	14-7-0	14-7-14	NOTEST	0	0.0231355	1.79769e+308	1.79769e+308	0.223676	1	no
Glyma0090s00300	Glyma0090s00300	Glyma0090s00300	scaffold_90:24885-25615	14-7-0	14-7-14	NOTEST	0.420634	0.491602	0.224926	-0.159375	0.873373	1	no
Glyma0090s00350	Glyma0090s00350	Glyma0090s00350	scaffold_90:44125-48952	14-7-0	14-7-14	NOTEST	0.0692582	0.303853	2.13332	-1.82428	0.0681096	1	no
Glyma0091s00230	Glyma0091s00230	Glyma0091s00230	scaffold_91:29255-30661	14-7-0	14-7-14	NOTEST	0	0	0	0	1	1	no
Glyma0092s00200	Glyma0092s00200	Glyma0092s00200	scaffold_92:4798-6418	14-7-0	14-7-14	OK	0.157239	1.29009	3.03644	-2.55739	0.010546	0.0993752	no
Glyma0092s00210	Glyma0092s00210	Glyma0092s00210	scaffold_92:9477-13080	14-7-0	14-7-14	OK	6.31744	5.39678	-0.227241	0.273195	0.784703	0.929316	no
Glyma0092s00230	Glyma0092s00230	Glyma0092s00230	scaffold_92:31216-33044	14-7-0	14-7-14	OK	40.9248	28.2595	-0.534241	0.707585	0.479203	0.776383	no
Glyma0092s00240	Glyma0092s00240	Glyma0092s00240	scaffold_92:54198-55797	14-7-0	14-7-14	OK	15.054	34.3466	1.19002	-1.59888	0.109847	0.373969	no
Glyma0096s100	Glyma0096s100	Glyma0096s100	scaffold_96:83938-84651	14-7-0	14-7-14	NOTEST	0	0	0	0	1	1	no
Glyma0096s50	Glyma0096s50	Glyma0096s50	scaffold_96:24926-29013	14-7-0	14-7-14	NOTEST	0	0	0	0	1	1	no
Glyma0101s00200	Glyma0101s00200	Glyma0101s00200	scaffold_101:409-679	14-7-0	14-7-14	NOTEST	0	0	0	0	1	1	no
Glyma0101s00210	Glyma0101s00210	Glyma0101s00210	scaffold_101:1190-2295	14-7-0	14-7-14	NOTEST	0	0	0	0	1	1	no
Glyma0101s00230	Glyma0101s00230	Glyma0101s00230	scaffold_101:16731-19812	14-7-0	14-7-14	NOTEST	0	0	0	0	1	1	no
Glyma0101s00241	Glyma0101s00241	Glyma0101s00241	scaffold_101:20750-20975	14-7-0	14-7-14	NOTEST	0	0	0	0	1	1	no
Glyma0101s00251	Glyma0101s00251	Glyma0101s00251	scaffold_101:42209-42999	14-7-0	14-7-14	NOTEST	0	0	0	0	1	1	no
Glyma0101s00260	Glyma0101s00260	Glyma0101s00260	scaffold_101:49116-50221	14-7-0	14-7-14	NOTEST	0	0	0	0	1	1	no
Glyma0103s100	Glyma0103s100	Glyma0103s100	scaffold_103:35985-36595	14-7-0	14-7-14	OK	0.0649507	0.680214	3.38857	-1.59779	0.11009	0.374138	no
Glyma0103s50	Glyma0103s50	Glyma0103s50	scaffold_103:19207-24805	14-7-0	14-7-14	NOTEST	0.161327	0.168562	0.0632911	-0.0425112	0.966091	1	no
Glyma0120s50	Glyma0120s50	Glyma0120s50	scaffold_120:55294-60491	14-7-0	14-7-14	NOTEST	0	0.00306767	1.79769e+308	1.79769e+308	0.476534	1	no
Glyma0121s00200	Glyma0121s00200	Glyma0121s00200	scaffold_121:11730-14225	14-7-0	14-7-14	NOTEST	0	0	0	0	1	1	no
Glyma0121s00230	Glyma0121s00230	Glyma0121s00230	scaffold_121:28095-29760	14-7-0	14-7-14	NOTEST	0	0	0	0	1	1	no
Glyma0121s00240	Glyma0121s00240	Glyma0121s00240	scaffold_121:38140-41744	14-7-0	14-7-14	NOTEST	0.00567328	0.0463733	3.03104	-0.444676	0.656554	1	no
Glyma0128s50	Glyma0128s50	Glyma0128s50	scaffold_128:8755-9643	14-7-0	14-7-14	NOTEST	0	0	0	0	1	1	no
Glyma0146s00210	Glyma0146s00210	Glyma0146s00210	scaffold_146:13454-14636	14-7-0	14-7-14	NOTEST	0	0	0	0	1	1	no
Glyma0165s00200	Glyma0165s00200	Glyma0165s00200	scaffold_165:18150-20209	14-7-0	14-7-14	NOTEST	0.0259892	0.0426442	0.714437	-0.248074	0.804077	1	no
Glyma0165s50	Glyma0165s50	Glyma0165s50	scaffold_165:12356-14234	14-7-0	14-7-14	NOTEST	0	0	0	0	1	1	no
Glyma0169s00200	Glyma0169s00200	Glyma0169s00200	scaffold_169:6036-7668	14-7-0	14-7-14	OK	98.8649	19.9094	-2.31201	2.8726	0.0040711	0.0551749	no
Glyma0169s00210	Glyma0169s00210	Glyma0169s00210	scaffold_169:10271-14284	14-7-0	14-7-14	OK	104.564	103.875	-0.00954412	0.00997049	0.992045	0.997481	no
Glyma0174s50	Glyma0174s50	Glyma0174s50	scaffold_174:28-832	14-7-0	14-7-14	NOTEST	0.386124	0	-1.79769e+308	-1.79769e+308	0.0651685	1	no
Glyma0175s50	Glyma0175s50	Glyma0175s50	scaffold_175:15261-16399	14-7-0	14-7-14	NOTEST	0	0	0	0	1	1	no
Glyma0196s00210	Glyma0196s00210	Glyma0196s00210	scaffold_196:12292-15573	14-7-0	14-7-14	NOTEST	0.0683417	0.206045	1.59212	-1.25591	0.209147	1	no
Glyma0196s130	Glyma0196s130	Glyma0196s130	scaffold_196:9547-9835	14-7-0	14-7-14	NOTEST	0	0	0	0	1	1	no
Glyma0196s50	Glyma0196s50	Glyma0196s50	scaffold_196:6280-7448	14-7-0	14-7-14	NOTEST	0	0	0	0	1	1	no
Glyma01g00210	Glyma01g00210	Glyma01g00210	Gm01:27642-27977	14-7-0	14-7-14	OK	3.20182	1.86308	-0.781205	0.355328	0.722344	0.903976	no
Glyma01g00241	Glyma01g00241	Glyma01g00241	Gm01:28504-30546	14-7-0	14-7-14	OK	1.59866	0.552155	-1.53372	1.45645	0.145269	0.437031	no
Glyma01g00270	Glyma01g00270	Glyma01g00270	Gm01:51480-61502	14-7-0	14-7-14	NOTEST	0.185959	0.0778292	-1.2566	0.888625	0.374205	1	no
Glyma01g00280	Glyma01g00280	Glyma01g00280	Gm01:61964-63428	14-7-0	14-7-14	NOTEST	0	0	0	0	1	1	no
Glyma01g00291	Glyma01g00291	Glyma01g00291	Gm01:69968-71359	14-7-0	14-7-14	OK	1.66631	1.54488	-0.109162	0.102145	0.918642	0.975062	no
Glyma01g00300	Glyma01g00300	Glyma01g00300	Gm01:90229-96102	14-7-0	14-7-14	OK	7.09904	4.30847	-0.720448	1.01505	0.310083	0.641514	no
Glyma01g00311	Glyma01g00311	Glyma01g00311	Gm01:111565-114809	14-7-0	14-7-14	NOTEST	0	0	0	0	1	1	no
Glyma01g00321	Glyma01g00321	Glyma01g00321	Gm01:116191-128024	14-7-0	14-7-14	OK	3.71494	3.55782	-0.0623457	0.0867593	0.930863	0.979064	no
Glyma01g00341	Glyma01g00341	Glyma01g00341	Gm01:143352-155722	14-7-0	14-7-14	OK	0	1.30929	1.79769e+308	1.79769e+308	0.0317346	0.187095	no
Glyma01g00361	Glyma01g00361	Glyma01g00361	Gm01:157174-157917	14-7-0	14-7-14	NOTEST	0	0.382166	1.79769e+308	1.79769e+308	0.0558529	1	no
Glyma01g00380	Glyma01g00380	Glyma01g00380	Gm01:170678-193544	14-7-0	14-7-14	OK	2.76121	3.77828	0.452429	-0.617492	0.53691	0.810982	no
Glyma01g00400	Glyma01g00400	Glyma01g00400	Gm01:196374-202050	14-7-0	14-7-14	OK	8.52071	6.46554	-0.398204	0.425368	0.670569	0.880778	no
Glyma01g00410	Glyma01g00410	Glyma01g00410	Gm01:205593-226050	14-7-0	14-7-14	OK	29.262	10.3759	-1.49579	1.79452	0.0727301	0.295098	no
Glyma01g00420	Glyma01g00420	Glyma01g00420	Gm01:205593-226050	14-7-0	14-7-14	NOTEST	0.241426	0.272467	0.174496	-0.0332232	0.973497	1	no
Glyma01g00430	Glyma01g00430	Glyma01g00430	Gm01:227158-238073	14-7-0	14-7-14	OK	19.6266	36.6595	0.901374	-1.04806	0.294612	0.625995	no
Glyma01g00440	Glyma01g00440	Glyma01g00440	Gm01:244255-244600	14-7-0	14-7-14	NOTEST	0	0	0	0	1	1	no
Glyma01g00450	Glyma01g00450	Glyma01g00450	Gm01:247079-274310	14-7-0	14-7-14	NOTEST	0	0	0	0	1	1	no
Glyma01g00460	Glyma01g00460	Glyma01g00460	Gm01:247079-274310	14-7-0	14-7-14	OK	2.62569	2.01825	-0.379586	0.348386	0.72755	0.905782	no
Glyma01g00470	Glyma01g00470	Glyma01g00470	Gm01:247079-274310	14-7-0	14-7-14	OK	6.50725	4.60774	-0.49799	0.527984	0.59751	0.845026	no
Glyma01g00481	Glyma01g00481	Glyma01g00481	Gm01:275569-278576	14-7-0	14-7-14	NOTEST	0	0.370685	1.79769e+308	1.79769e+308	0.029041	1	no
Glyma01g00490	Glyma01g00490	Glyma01g00490	Gm01:281068-285680	14-7-0	14-7-14	NOTEST	0	0	0	0	1	1	no
Glyma01g00500	Glyma01g00500	Glyma01g00500	Gm01:285991-288741	14-7-0	14-7-14	OK	95.8299	152.663	0.671803	-0.820454	0.411957	0.730158	no
Glyma01g00510	Glyma01g00510	Glyma01g00510	Gm01:291440-297515	14-7-0	14-7-14	OK	3.09792	7.02042	1.18026	-1.46129	0.143937	0.434681	no
Glyma01g00520	Glyma01g00520	Glyma01g00520	Gm01:303945-308194	14-7-0	14-7-14	OK	2.64573	2.67077	0.013589	-0.0135671	0.989175	0.996795	no
Glyma01g00530	Glyma01g00530	Glyma01g00530	Gm01:318581-323172	14-7-0	14-7-14	NOTEST	0	0	0	0	1	1	no
Glyma01g00541	Glyma01g00541	Glyma01g00541	Gm01:329083-331923	14-7-0	14-7-14	OK	4.45494	6.28917	0.497464	-0.60011	0.548433	0.81804	no
Glyma01g00551	Glyma01g00551	Glyma01g00551	Gm01:333453-334355	14-7-0	14-7-14	NOTEST	0	0	0	0	1	1	no
Glyma01g00560	Glyma01g00560	Glyma01g00560	Gm01:335231-337098	14-7-0	14-7-14	OK	4.39687	6.06397	0.463785	-0.632309	0.527185	0.805781	no
Glyma01g00570	Glyma01g00570	Glyma01g00570	Gm01:339899-343391	14-7-0	14-7-14	OK	27.0911	14.5727	-0.894548	1.26183	0.20701	0.527123	no
Glyma01g00580	Glyma01g00580	Glyma01g00580	Gm01:344017-344620	14-7-0	14-7-14	NOTEST	0	0	0	0	1	1	no
Glyma01g00590	Glyma01g00590	Glyma01g00590	Gm01:346489-350011	14-7-0	14-7-14	OK	22.5554	24.1816	0.100442	-0.142918	0.886355	0.965001	no
Glyma01g00600	Glyma01g00600	Glyma01g00600	Gm01:363275-365404	14-7-0	14-7-14	OK	17.1372	19.6543	0.197715	-0.280357	0.779204	0.927398	no
Glyma01g00610	Glyma01g00610	Glyma01g00610	Gm01:369322-375842	14-7-0	14-7-14	OK	15.6662	5.83444	-1.42499	1.43566	0.151098	0.446012	no
Glyma01g00620	Glyma01g00620	Glyma01g00620	Gm01:369322-375842	14-7-0	14-7-14	NOTEST	0	0.0922966	1.79769e+308	1.79769e+308	0.37881	1	no
Glyma01g00640	Glyma01g00640	Glyma01g00640	Gm01:380015-381810	14-7-0	14-7-14	OK	4.63333	6.54652	0.498678	-0.691632	0.489169	0.783948	no
Glyma01g00660	Glyma01g00660	Glyma01g00660	Gm01:384777-386898	14-7-0	14-7-14	NOTEST	0	0.0642238	1.79769e+308	1.79769e+308	0.223676	1	no
Glyma01g00670	Glyma01g00670	Glyma01g00670	Gm01:387855-391000	14-7-0	14-7-14	OK	2.08123	1.93873	-0.102322	0.121728	0.903115	0.970987	no
Glyma01g00680	Glyma01g00680	Glyma01g00680	Gm01:391564-396978	14-7-0	14-7-14	OK	3.38676	3.08999	-0.132307	0.163825	0.869869	0.960441	no
Glyma01g00690	Glyma01g00690	Glyma01g00690	Gm01:397383-400581	14-7-0	14-7-14	OK	5.81245	11.5116	0.985873	-1.16826	0.242701	0.570327	no
Glyma01g00700	Glyma01g00700	Glyma01g00700	Gm01:411261-413277	14-7-0	14-7-14	NOTEST	0	0	0	0	1	1	no
Glyma01g00710	Glyma01g00710	Glyma01g00710	Gm01:415321-417655	14-7-0	14-7-14	OK	0	0.504031	1.79769e+308	1.79769e+308	0.047229	0.230998	no
Glyma01g00720	Glyma01g00720	Glyma01g00720	Gm01:418762-423973	14-7-0	14-7-14	OK	2.12218	2.74214	0.369756	-0.511691	0.608868	0.850577	no
Glyma01g00730	Glyma01g00730	Glyma01g00730	Gm01:425499-427881	14-7-0	14-7-14	OK	1.10219	9.12757	3.04986	-2.83259	0.0046172	0.0597059	no
Glyma01g00740	Glyma01g00740	Glyma01g00740	Gm01:429463-430748	14-7-0	14-7-14	OK	129.674	39.0193	-1.73263	2.05243	0.0401276	0.21098	no
Glyma01g00750	Glyma01g00750	Glyma01g00750	Gm01:431176-433062	14-7-0	14-7-14	NOTEST	0.169691	0.14364	-0.240445	0.1868	0.851817	1	no
Glyma01g00760	Glyma01g00760	Glyma01g00760	Gm01:434429-437563	14-7-0	14-7-14	OK	15.9702	20.4821	0.35898	-0.452451	0.650944	0.871131	no
Glyma01g00771	Glyma01g00771	Glyma01g00771	Gm01:438390-439678	14-7-0	14-7-14	OK	3.24436	7.52001	1.2128	-1.41007	0.15852	0.45824	no
Glyma01g00780	Glyma01g00780	Glyma01g00780	Gm01:441913-445194	14-7-0	14-7-14	NOTEST	0.29153	0.22465	-0.375968	0.301768	0.762829	1	no
Glyma01g00790	Glyma01g00790	Glyma01g00790	Gm01:446961-452958	14-7-0	14-7-14	NOTEST	0	0.0543687	1.79769e+308	1.79769e+308	0.0702947	1	no
Glyma01g00805	Glyma01g00805	Glyma01g00805	Gm01:457615-459673	14-7-0	14-7-14	NOTEST	0	0.103985	1.79769e+308	1.79769e+308	0.0777245	1	no
Glyma01g00820	Glyma01g00820	Glyma01g00820	Gm01:464651-466721	14-7-0	14-7-14	OK	2.00787	8.60679	2.09981	-2.71041	0.00671999	0.0754295	no
Glyma01g00840	Glyma01g00840	Glyma01g00840	Gm01:505341-508290	14-7-0	14-7-14	NOTEST	0	0.118951	1.79769e+308	1.79769e+308	0.13134	1	no
Glyma01g00850	Glyma01g00850	Glyma01g00850	Gm01:512025-517266	14-7-0	14-7-14	OK	5.30989	2.21685	-1.26017	1.69737	0.089627	0.333146	no
Glyma01g00860	Glyma01g00860	Glyma01g00860	Gm01:518296-520313	14-7-0	14-7-14	OK	8.95422	13.8243	0.626561	-0.778808	0.436093	0.748733	no
Glyma01g00870	Glyma01g00870	Glyma01g00870	Gm01:523808-529106	14-7-0	14-7-14	OK	29.9683	27.1566	-0.142133	0.161265	0.871885	0.960916	no
Glyma01g00880	Glyma01g00880	Glyma01g00880	Gm01:544620-550750	14-7-0	14-7-14	OK	0.120546	0.522814	2.11671	-1.53266	0.12536	0.402241	no
Glyma01g00890	Glyma01g00890	Glyma01g00890	Gm01:559624-561661	14-7-0	14-7-14	OK	0	0.551144	1.79769e+308	1.79769e+308	0.0285404	0.177579	no
Glyma01g00900	Glyma01g00900	Glyma01g00900	Gm01:562674-567038	14-7-0	14-7-14	NOTEST	0	0	0	0	1	1	no
Glyma01g00910	Glyma01g00910	Glyma01g00910	Gm01:567202-572032	14-7-0	14-7-14	NOTEST	0.100282	0.361221	1.84882	-1.5078	0.131605	1	no
Glyma01g00920	Glyma01g00920	Glyma01g00920	Gm01:576437-580149	14-7-0	14-7-14	NOTEST	0	0	0	0	1	1	no
Glyma01g00930	Glyma01g00930	Glyma01g00930	Gm01:585699-587056	14-7-0	14-7-14	NOTEST	0.428036	0.402697	-0.08804	0.0719775	0.94262	1	no
Glyma01g00940	Glyma01g00940	Glyma01g00940	Gm01:588160-598604	14-7-0	14-7-14	OK	29.15	9.86439	-1.56319	2.07073	0.0383843	0.206588	no
Glyma01g00950	Glyma01g00950	Glyma01g00950	Gm01:598924-599925	14-7-0	14-7-14	OK	0.510537	1.5556	1.60738	-1.4729	0.140777	0.4299	no
Glyma01g00960	Glyma01g00960	Glyma01g00960	Gm01:604191-612760	14-7-0	14-7-14	OK	6.93611	4.93472	-0.491157	0.614864	0.538644	0.81168	no
Glyma01g00975	Glyma01g00975	Glyma01g00975	Gm01:613982-641941	14-7-0	14-7-14	OK	1.13622	1.2813	0.173364	-0.212059	0.832061	0.947215	no
Glyma01g00990	Glyma01g00990	Glyma01g00990	Gm01:643213-651111	14-7-0	14-7-14	OK	1.74277	3.07569	0.819527	-1.13969	0.254416	0.58367	no
Glyma01g01000	Glyma01g01000	Glyma01g01000	Gm01:652294-658333	14-7-0	14-7-14	OK	26.5431	4.24657	-2.64397	3.1363	0.00171094	0.0310332	yes
Glyma01g01010	Glyma01g01010	Glyma01g01010	Gm01:663901-668594	14-7-0	14-7-14	OK	0.483069	0.765795	0.664729	-0.529629	0.596369	0.844514	no
Glyma01g01020	Glyma01g01020	Glyma01g01020	Gm01:670826-674335	14-7-0	14-7-14	OK	41.1806	29.5299	-0.479788	0.587928	0.556581	0.822879	no
Glyma01g01030	Glyma01g01030	Glyma01g01030	Gm01:681416-683646	14-7-0	14-7-14	NOTEST	0.101294	0.37131	1.87407	-1.51158	0.13064	1	no
Glyma01g01050	Glyma01g01050	Glyma01g01050	Gm01:706987-708399	14-7-0	14-7-14	NOTEST	0	0.0393448	1.79769e+308	1.79769e+308	0.141284	1	no
Glyma01g01060	Glyma01g01060	Glyma01g01060	Gm01:729658-735082	14-7-0	14-7-14	OK	10.7329	4.59175	-1.22492	1.61216	0.106928	0.369127	no
Glyma01g01070	Glyma01g01070	Glyma01g01070	Gm01:735854-740661	14-7-0	14-7-14	NOTEST	0.113025	0.0873647	-0.371526	0.284867	0.775746	1	no
Glyma01g01080	Glyma01g01080	Glyma01g01080	Gm01:741674-745361	14-7-0	14-7-14	OK	0.415793	1.86382	2.16432	-2.39552	0.0165969	0.130473	no
Glyma01g01090	Glyma01g01090	Glyma01g01090	Gm01:746504-750472	14-7-0	14-7-14	NOTEST	0	0.0781096	1.79769e+308	1.79769e+308	0.0558529	1	no
Glyma01g01101	Glyma01g01101	Glyma01g01101	Gm01:752181-756473	14-7-0	14-7-14	NOTEST	0	0	0	0	1	1	no
Glyma01g01110	Glyma01g01110	Glyma01g01110	Gm01:757751-761280	14-7-0	14-7-14	OK	6.41811	4.09029	-0.649946	0.920476	0.357324	0.684836	no
Glyma01g01120	Glyma01g01120	Glyma01g01120	Gm01:762982-771636	14-7-0	14-7-14	NOTEST	0.327495	0.275286	-0.25054	0.232309	0.816298	1	no
Glyma01g01130	Glyma01g01130	Glyma01g01130	Gm01:773986-783534	14-7-0	14-7-14	NOTEST	0	0.0207314	1.79769e+308	1.79769e+308	0.406492	1	no
Glyma01g01140	Glyma01g01140	Glyma01g01140	Gm01:773986-783534	14-7-0	14-7-14	OK	3.46134	3.06333	-0.176233	0.202924	0.839194	0.949672	no
Glyma01g01150	Glyma01g01150	Glyma01g01150	Gm01:786786-790850	14-7-0	14-7-14	NOTEST	0.0962851	0.242528	1.33277	-1.00929	0.312836	1	no
Glyma01g01160	Glyma01g01160	Glyma01g01160	Gm01:801794-812173	14-7-0	14-7-14	NOTEST	0	0	0	0	1	1	no
Glyma01g01165	Glyma01g01165	Glyma01g01165	Gm01:813195-815449	14-7-0	14-7-14	NOTEST	0	0	0	0	1	1	no
Glyma01g01170	Glyma01g01170	Glyma01g01170	Gm01:817680-822876	14-7-0	14-7-14	OK	3.77408	2.00508	-0.912466	1.10172	0.270584	0.601732	no
Glyma01g01180	Glyma01g01180	Glyma01g01180	Gm01:826828-831862	14-7-0	14-7-14	OK	23.5069	36.7116	0.643149	-0.731126	0.464702	0.767652	no
Glyma01g01190	Glyma01g01190	Glyma01g01190	Gm01:837437-839839	14-7-0	14-7-14	OK	10.0545	14.2404	0.50214	-0.684556	0.493624	0.785852	no
Glyma01g01210	Glyma01g01210	Glyma01g01210	Gm01:841603-854009	14-7-0	14-7-14	NOTEST	0.058515	0.283475	2.27634	-1.85646	0.0633874	1	no
Glyma01g01220	Glyma01g01220	Glyma01g01220	Gm01:861697-864316	14-7-0	14-7-14	OK	11.6462	6.95655	-0.743411	0.917678	0.358788	0.685724	no
Glyma01g01230	Glyma01g01230	Glyma01g01230	Gm01:864945-873519	14-7-0	14-7-14	OK	2.04921	2.55963	0.320865	-0.432629	0.665284	0.877867	no
Glyma01g01240	Glyma01g01240	Glyma01g01240	Gm01:882373-883583	14-7-0	14-7-14	NOTEST	0.403287	0.15975	-1.33599	1.04564	0.295729	1	no
Glyma01g01251	Glyma01g01251	Glyma01g01251	Gm01:897328-899783	14-7-0	14-7-14	NOTEST	0.0271554	0.0585139	1.10754	-0.617307	0.537032	1	no
Glyma01g01260	Glyma01g01260	Glyma01g01260	Gm01:901470-902792	14-7-0	14-7-14	OK	22.6618	113.357	2.32254	-2.9728	0.00295095	0.0444109	yes
Glyma01g01270	Glyma01g01270	Glyma01g01270	Gm01:908126-916913	14-7-0	14-7-14	OK	9.41284	8.22568	-0.194494	0.276043	0.782515	0.928336	no
Glyma01g01280	Glyma01g01280	Glyma01g01280	Gm01:919766-925870	14-7-0	14-7-14	OK	0.930097	2.43354	1.3876	-1.7551	0.0792422	0.310524	no
Glyma01g01291	Glyma01g01291	Glyma01g01291	Gm01:934414-936646	14-7-0	14-7-14	OK	0.270436	1.26921	2.23058	-1.92237	0.0545587	0.250779	no
Glyma01g01300	Glyma01g01300	Glyma01g01300	Gm01:937313-940538	14-7-0	14-7-14	NOTEST	0.235197	0.477461	1.02151	-0.874688	0.381744	1	no
Glyma01g01310	Glyma01g01310	Glyma01g01310	Gm01:952468-956652	14-7-0	14-7-14	OK	0.170222	1.27987	2.9105	-2.74913	0.00597532	0.0703682	no
Glyma01g01330	Glyma01g01330	Glyma01g01330	Gm01:959531-963281	14-7-0	14-7-14	OK	20.8404	13.3083	-0.647059	0.914792	0.360301	0.686936	no
Glyma01g01340	Glyma01g01340	Glyma01g01340	Gm01:966937-971332	14-7-0	14-7-14	OK	27.1866	13.2881	-1.03276	1.42433	0.15435	0.451576	no
Glyma01g01350	Glyma01g01350	Glyma01g01350	Gm01:972898-978372	14-7-0	14-7-14	OK	1.91149	0.907022	-1.07549	0.914242	0.36059	0.686952	no
Glyma01g01360	Glyma01g01360	Glyma01g01360	Gm01:980271-987366	14-7-0	14-7-14	OK	1.84247	4.30469	1.22427	-1.59942	0.109728	0.37395	no
Glyma01g01365	Glyma01g01365	Glyma01g01365	Gm01:991596-992349	14-7-0	14-7-14	NOTEST	0	0	0	0	1	1	no
Glyma01g01370	Glyma01g01370	Glyma01g01370	Gm01:992662-997177	14-7-0	14-7-14	OK	732.747	205.279	-1.83573	1.30405	0.192217	0.508648	no
Glyma01g01380	Glyma01g01380	Glyma01g01380	Gm01:1000826-1006591	14-7-0	14-7-14	OK	12.4587	21.3409	0.776464	-1.05911	0.289548	0.620883	no
Glyma01g01390	Glyma01g01390	Glyma01g01390	Gm01:1008758-1013501	14-7-0	14-7-14	OK	31.7462	10.0926	-1.65328	2.1957	0.0281134	0.176196	no
Glyma01g01400	Glyma01g01400	Glyma01g01400	Gm01:1018233-1021659	14-7-0	14-7-14	OK	9.39928	0.709986	-3.72669	4.48378	7.33317e-06	0.000552573	yes
Glyma01g01410	Glyma01g01410	Glyma01g01410	Gm01:1023044-1025742	14-7-0	14-7-14	OK	78.0793	46.1323	-0.759161	1.01706	0.309126	0.64048	no
Glyma01g01420	Glyma01g01420	Glyma01g01420	Gm01:1028982-1033386	14-7-0	14-7-14	NOTEST	0	0.0640742	1.79769e+308	1.79769e+308	0.0644759	1	no
Glyma01g01431	Glyma01g01431	Glyma01g01431	Gm01:1035987-1043507	14-7-0	14-7-14	OK	3.22585	2.07057	-0.639651	0.829473	0.406837	0.726058	no
Glyma01g01440	Glyma01g01440	Glyma01g01440	Gm01:1047147-1051040	14-7-0	14-7-14	OK	16.8217	9.5999	-0.809237	0.956962	0.338586	0.66828	no
Glyma01g01450	Glyma01g01450	Glyma01g01450	Gm01:1052601-1053493	14-7-0	14-7-14	OK	0.670668	3.51257	2.38886	-2.20441	0.0274958	0.174314	no
Glyma01g01460	Glyma01g01460	Glyma01g01460	Gm01:1056819-1061665	14-7-0	14-7-14	OK	12.4027	8.02691	-0.627734	0.889404	0.373786	0.699229	no
Glyma01g01470	Glyma01g01470	Glyma01g01470	Gm01:1066130-1073350	14-7-0	14-7-14	OK	4.70438	4.12193	-0.190685	0.271004	0.786388	0.929757	no
Glyma01g01480	Glyma01g01480	Glyma01g01480	Gm01:1088031-1090516	14-7-0	14-7-14	OK	17.4644	5.88642	-1.56896	2.15675	0.0310253	0.185515	no
Glyma01g01491	Glyma01g01491	Glyma01g01491	Gm01:1091316-1094909	14-7-0	14-7-14	OK	1.10752	0.721107	-0.619046	0.590538	0.55483	0.821841	no
Glyma01g01500	Glyma01g01500	Glyma01g01500	Gm01:1095456-1099007	14-7-0	14-7-14	NOTEST	0	0.0215238	1.79769e+308	1.79769e+308	0.223676	1	no
Glyma01g01510	Glyma01g01510	Glyma01g01510	Gm01:1125596-1130365	14-7-0	14-7-14	NOTEST	0	0.145672	1.79769e+308	1.79769e+308	0.052544	1	no
Glyma01g01521	Glyma01g01521	Glyma01g01521	Gm01:1133845-1137317	14-7-0	14-7-14	OK	0.63671	0.534481	-0.252499	0.235375	0.813918	0.939965	no
Glyma01g01530	Glyma01g01530	Glyma01g01530	Gm01:1138207-1139962	14-7-0	14-7-14	NOTEST	0	0.0162222	1.79769e+308	1.79769e+308	0.295535	1	no
Glyma01g01550	Glyma01g01550	Glyma01g01550	Gm01:1143928-1150404	14-7-0	14-7-14	NOTEST	0	0.120717	1.79769e+308	1.79769e+308	0.0510713	1	no
Glyma01g01560	Glyma01g01560	Glyma01g01560	Gm01:1160591-1165098	14-7-0	14-7-14	NOTEST	0.0455254	0.141792	1.63903	-1.31267	0.189294	1	no
Glyma01g01570	Glyma01g01570	Glyma01g01570	Gm01:1165649-1171110	14-7-0	14-7-14	NOTEST	0.0864474	0.247279	1.51624	-1.20717	0.227368	1	no
Glyma01g01580	Glyma01g01580	Glyma01g01580	Gm01:1185427-1188776	14-7-0	14-7-14	NOTEST	0.053593	0.0097422	-2.45972	0.84674	0.39714	1	no
Glyma01g01590	Glyma01g01590	Glyma01g01590	Gm01:1196921-1198375	14-7-0	14-7-14	OK	6.77202	6.97469	0.0425423	-0.0430724	0.965644	0.989847	no
Glyma01g01601	Glyma01g01601	Glyma01g01601	Gm01:1201663-1205929	14-7-0	14-7-14	OK	9.01563	10.5484	0.226527	-0.32217	0.747324	0.913912	no
Glyma01g01610	Glyma01g01610	Glyma01g01610	Gm01:1207927-1212597	14-7-0	14-7-14	OK	9.12104	7.52667	-0.277187	0.392035	0.695032	0.891254	no
Glyma01g01620	Glyma01g01620	Glyma01g01620	Gm01:1215172-1220713	14-7-0	14-7-14	OK	0.799144	0.163801	-2.28651	1.87153	0.0612713	0.268042	no
Glyma01g01630	Glyma01g01630	Glyma01g01630	Gm01:1224165-1228877	14-7-0	14-7-14	NOTEST	0	0	0	0	1	1	no
Glyma01g01641	Glyma01g01641	Glyma01g01641	Gm01:1231917-1233070	14-7-0	14-7-14	NOTEST	0	0	0	0	1	1	no
Glyma01g01651	Glyma01g01651	Glyma01g01651	Gm01:1235950-1236741	14-7-0	14-7-14	NOTEST	0	0.273933	1.79769e+308	1.79769e+308	0.0737647	1	no
Glyma01g01661	Glyma01g01661	Glyma01g01661	Gm01:1237990-1239189	14-7-0	14-7-14	OK	14.062	7.79428	-0.851312	0.616754	0.537397	0.811107	no
Glyma01g01671	Glyma01g01671	Glyma01g01671	Gm01:1237990-1239189	14-7-0	14-7-14	OK	7.60684	1.87219	-2.02257	1.03207	0.302039	0.633292	no
Glyma01g01680	Glyma01g01680	Glyma01g01680	Gm01:1241352-1245024	14-7-0	14-7-14	NOTEST	0	0.0412363	1.79769e+308	1.79769e+308	0.0702947	1	no
Glyma01g01690	Glyma01g01690	Glyma01g01690	Gm01:1252980-1257657	14-7-0	14-7-14	NOTEST	0	0	0	0	1	1	no
Glyma01g01700	Glyma01g01700	Glyma01g01700	Gm01:1273194-1280313	14-7-0	14-7-14	NOTEST	0	0	0	0	1	1	no
Glyma01g01715	Glyma01g01715	Glyma01g01715	Gm01:1283531-1285362	14-7-0	14-7-14	NOTEST	0	0	0	0	1	1	no
Glyma01g01730	Glyma01g01730	Glyma01g01730	Gm01:1289360-1298217	14-7-0	14-7-14	OK	1.39923	2.53752	0.858787	-1.05445	0.291678	0.623488	no
Glyma01g01740	Glyma01g01740	Glyma01g01740	Gm01:1307387-1317730	14-7-0	14-7-14	OK	2.61576	4.15423	0.667353	-0.828004	0.407668	0.726337	no
Glyma01g01750	Glyma01g01750	Glyma01g01750	Gm01:1319394-1322259	14-7-0	14-7-14	OK	3.74191	2.25877	-0.728236	0.99556	0.319464	0.650728	no
Glyma01g01770	Glyma01g01770	Glyma01g01770	Gm01:1332992-1336611	14-7-0	14-7-14	OK	22.9718	4.61997	-2.31391	2.50292	0.0123173	0.109075	no
Glyma01g01780	Glyma01g01780	Glyma01g01780	Gm01:1342969-1347966	14-7-0	14-7-14	NOTEST	0.024451	0.256471	3.39083	-1.95724	0.0503187	1	no
Glyma01g01790	Glyma01g01790	Glyma01g01790	Gm01:1357260-1362758	14-7-0	14-7-14	NOTEST	0.353644	0.284592	-0.3134	0.260791	0.794254	1	no
Glyma01g01805	Glyma01g01805	Glyma01g01805	Gm01:1377132-1387290	14-7-0	14-7-14	OK	2.03635	4.07862	1.0021	-1.12569	0.260298	0.590901	no
Glyma01g01820	Glyma01g01820	Glyma01g01820	Gm01:1391664-1392341	14-7-0	14-7-14	NOTEST	0	0	0	0	1	1	no
Glyma01g01830	Glyma01g01830	Glyma01g01830	Gm01:1394336-1398687	14-7-0	14-7-14	OK	22.4493	10.367	-1.11468	1.41238	0.157839	0.457162	no
Glyma01g01840	Glyma01g01840	Glyma01g01840	Gm01:1399714-1403226	14-7-0	14-7-14	OK	3.24281	3.9703	0.292002	-0.298572	0.765267	0.922677	no
Glyma01g01850	Glyma01g01850	Glyma01g01850	Gm01:1409321-1416077	14-7-0	14-7-14	OK	0.553894	0.843727	0.607165	-0.647971	0.517004	0.800254	no
Glyma01g01860	Glyma01g01860	Glyma01g01860	Gm01:1432595-1439227	14-7-0	14-7-14	OK	4.26818	2.4334	-0.810645	0.997875	0.31834	0.649774	no
Glyma01g01875	Glyma01g01875	Glyma01g01875	Gm01:1464340-1468599	14-7-0	14-7-14	OK	3.69452	6.05173	0.711962	-0.855176	0.392454	0.715089	no
Glyma01g01890	Glyma01g01890	Glyma01g01890	Gm01:1483775-1488285	14-7-0	14-7-14	OK	17.2143	10.031	-0.779141	1.09719	0.272557	0.603359	no
Glyma01g01900	Glyma01g01900	Glyma01g01900	Gm01:1489317-1495820	14-7-0	14-7-14	OK	13.6288	22.2811	0.709161	-0.80508	0.420773	0.736465	no
Glyma01g01910	Glyma01g01910	Glyma01g01910	Gm01:1500824-1504087	14-7-0	14-7-14	OK	142.031	38.0365	-1.90075	1.63716	0.101597	0.357838	no
Glyma01g01920	Glyma01g01920	Glyma01g01920	Gm01:1504880-1510358	14-7-0	14-7-14	NOTEST	0.123769	0.179126	0.533325	-0.461957	0.644112	1	no
Glyma01g01930	Glyma01g01930	Glyma01g01930	Gm01:1511111-1512857	14-7-0	14-7-14	OK	2.49753	2.60445	0.060479	-0.0559383	0.955391	0.987395	no
Glyma01g01940	Glyma01g01940	Glyma01g01940	Gm01:1514417-1515781	14-7-0	14-7-14	OK	20.9553	39.9891	0.932289	-1.29389	0.195704	0.51287	no
Glyma01g01950	Glyma01g01950	Glyma01g01950	Gm01:1520439-1523995	14-7-0	14-7-14	OK	11.0715	7.76412	-0.511951	0.721046	0.470881	0.771557	no
Glyma01g01960	Glyma01g01960	Glyma01g01960	Gm01:1526003-1531395	14-7-0	14-7-14	OK	1.75419	1.21375	-0.531329	0.571592	0.567599	0.828262	no
Glyma01g01970	Glyma01g01970	Glyma01g01970	Gm01:1532782-1536385	14-7-0	14-7-14	OK	2.62529	2.38106	-0.140873	0.125707	0.899964	0.969842	no
Glyma01g01980	Glyma01g01980	Glyma01g01980	Gm01:1537139-1538153	14-7-0	14-7-14	NOTEST	0	0	0	0	1	1	no
Glyma01g01990	Glyma01g01990	Glyma01g01990	Gm01:1540562-1544363	14-7-0	14-7-14	OK	7.21594	7.29379	0.0154817	-0.0220451	0.982412	0.994802	no
Glyma01g02020	Glyma01g02020	Glyma01g02020	Gm01:1547972-1555699	14-7-0	14-7-14	LOWDATA	0	0	-1.79769e+308	0	1	1	no
Glyma01g02031	Glyma01g02031	Glyma01g02031	Gm01:1547972-1555699	14-7-0	14-7-14	NOTEST	0.201877	0.325038	0.687135	-0.605181	0.545059	1	no
Glyma01g02040	Glyma01g02040	Glyma01g02040	Gm01:1558849-1560186	14-7-0	14-7-14	OK	5.01638	3.95899	-0.341514	0.372435	0.709569	0.898474	no
Glyma01g02050	Glyma01g02050	Glyma01g02050	Gm01:1564664-1568931	14-7-0	14-7-14	OK	2.8599	2.531	-0.176259	0.196192	0.84446	0.951798	no
Glyma01g02060	Glyma01g02060	Glyma01g02060	Gm01:1577696-1587475	14-7-0	14-7-14	OK	7.29202	16.4865	1.17689	-1.54256	0.122938	0.398091	no
Glyma01g02070	Glyma01g02070	Glyma01g02070	Gm01:1596899-1599449	14-7-0	14-7-14	OK	0.166432	0.676424	2.023	-1.64423	0.100128	0.355041	no
Glyma01g02080	Glyma01g02080	Glyma01g02080	Gm01:1603349-1604459	14-7-0	14-7-14	NOTEST	0	0	0	0	1	1	no
Glyma01g02090	Glyma01g02090	Glyma01g02090	Gm01:1613117-1616592	14-7-0	14-7-14	OK	33.0881	26.5078	-0.319898	0.431511	0.666097	0.87818	no
Glyma01g02100	Glyma01g02100	Glyma01g02100	Gm01:1618639-1623534	14-7-0	14-7-14	OK	5.13794	6.65007	0.372179	-0.527353	0.597949	0.84528	no
Glyma01g02110	Glyma01g02110	Glyma01g02110	Gm01:1626846-1628287	14-7-0	14-7-14	OK	6.11295	13.0912	1.09866	-1.27043	0.20393	0.523213	no
Glyma01g02120	Glyma01g02120	Glyma01g02120	Gm01:1633690-1637207	14-7-0	14-7-14	OK	15.6612	21.8985	0.483637	-0.681675	0.495444	0.786774	no
Glyma01g02130	Glyma01g02130	Glyma01g02130	Gm01:1642576-1643443	14-7-0	14-7-14	NOTEST	0	0	0	0	1	1	no
Glyma01g02140	Glyma01g02140	Glyma01g02140	Gm01:1648084-1649989	14-7-0	14-7-14	NOTEST	0	0.206499	1.79769e+308	1.79769e+308	0.0677717	1	no
Glyma01g02150	Glyma01g02150	Glyma01g02150	Gm01:1653306-1656923	14-7-0	14-7-14	OK	30.9548	22.9722	-0.430276	0.588012	0.556524	0.822879	no
Glyma01g02160	Glyma01g02160	Glyma01g02160	Gm01:1662473-1663732	14-7-0	14-7-14	NOTEST	0	0.0831176	1.79769e+308	1.79769e+308	0.223676	1	no
Glyma01g02171	Glyma01g02171	Glyma01g02171	Gm01:1673102-1673545	14-7-0	14-7-14	NOTEST	0.337431	0	-1.79769e+308	-1.79769e+308	0.0965277	1	no
Glyma01g02180	Glyma01g02180	Glyma01g02180	Gm01:1688059-1691046	14-7-0	14-7-14	OK	32.6672	16.3902	-0.995014	1.33282	0.182589	0.495208	no
Glyma01g02190	Glyma01g02190	Glyma01g02190	Gm01:1721264-1722533	14-7-0	14-7-14	OK	9.56735	5.88148	-0.701941	0.857976	0.390906	0.714111	no
Glyma01g02200	Glyma01g02200	Glyma01g02200	Gm01:1733389-1734562	14-7-0	14-7-14	OK	4.08941	5.82471	0.510292	-0.655868	0.511909	0.797502	no
Glyma01g02215	Glyma01g02215	Glyma01g02215	Gm01:1735229-1736763	14-7-0	14-7-14	OK	13.8494	73.6037	2.40995	-2.95372	0.00313966	0.0462793	yes
Glyma01g02230	Glyma01g02230	Glyma01g02230	Gm01:1744296-1745378	14-7-0	14-7-14	OK	3.98413	12.8449	1.68886	-1.7777	0.0754532	0.301897	no
Glyma01g02235	Glyma01g02235	Glyma01g02235	Gm01:1747643-1748703	14-7-0	14-7-14	NOTEST	0	0.173981	1.79769e+308	1.79769e+308	0.223676	1	no
Glyma01g02240	Glyma01g02240	Glyma01g02240	Gm01:1748705-1753242	14-7-0	14-7-14	OK	2.02326	2.09304	0.0489148	-0.0629209	0.94983	0.9856	no
Glyma01g02251	Glyma01g02251	Glyma01g02251	Gm01:1771935-1773875	14-7-0	14-7-14	OK	18.1549	27.707	0.609886	-0.792379	0.428139	0.741995	no
Glyma01g02260	Glyma01g02260	Glyma01g02260	Gm01:1781864-1782671	14-7-0	14-7-14	NOTEST	0	0.146947	1.79769e+308	1.79769e+308	0.0940746	1	no
Glyma01g02270	Glyma01g02270	Glyma01g02270	Gm01:1782704-1786280	14-7-0	14-7-14	OK	2.46177	3.54458	0.525916	-0.529086	0.596746	0.844638	no
Glyma01g02280	Glyma01g02280	Glyma01g02280	Gm01:1788990-1791158	14-7-0	14-7-14	OK	3.28641	8.07189	1.29639	-1.74198	0.0815127	0.315319	no
Glyma01g02290	Glyma01g02290	Glyma01g02290	Gm01:1803011-1804370	14-7-0	14-7-14	OK	20.3096	11.3794	-0.835734	1.18999	0.234051	0.559228	no
Glyma01g02295	Glyma01g02295	Glyma01g02295	Gm01:1813531-1816390	14-7-0	14-7-14	NOTEST	0	0	0	0	1	1	no
Glyma01g02300	Glyma01g02300	Glyma01g02300	Gm01:1817115-1820935	14-7-0	14-7-14	NOTEST	0.275477	0.436147	0.662883	-0.580359	0.561673	1	no
Glyma01g02310	Glyma01g02310	Glyma01g02310	Gm01:1822915-1823629	14-7-0	14-7-14	NOTEST	0	0	0	0	1	1	no
Glyma01g02321	Glyma01g02321	Glyma01g02321	Gm01:1825753-1835393	14-7-0	14-7-14	OK	12.2505	7.8038	-0.650592	0.8178	0.413472	0.731384	no
Glyma01g02330	Glyma01g02330	Glyma01g02330	Gm01:1838125-1845872	14-7-0	14-7-14	OK	0.705405	2.03474	1.52832	-1.73778	0.082249	0.316724	no
Glyma01g02340	Glyma01g02340	Glyma01g02340	Gm01:1865275-1868142	14-7-0	14-7-14	OK	2.78037	9.34683	1.7492	-2.37445	0.0175752	0.13527	no
Glyma01g02350	Glyma01g02350	Glyma01g02350	Gm01:1886187-1890464	14-7-0	14-7-14	OK	3.80679	6.09491	0.679029	-0.821743	0.411223	0.729949	no
Glyma01g02360	Glyma01g02360	Glyma01g02360	Gm01:1905414-1906471	14-7-0	14-7-14	OK	14.5266	0.986156	-3.88074	4.15976	3.18589e-05	0.00176291	yes
Glyma01g02380	Glyma01g02380	Glyma01g02380	Gm01:1929549-1932204	14-7-0	14-7-14	OK	1.40035	0.706348	-0.987339	1.05053	0.293473	0.624915	no
Glyma01g02390	Glyma01g02390	Glyma01g02390	Gm01:1940680-1942652	14-7-0	14-7-14	OK	0.314063	1.53262	2.28687	-2.12941	0.0332201	0.191875	no
Glyma01g02400	Glyma01g02400	Glyma01g02400	Gm01:1969464-1975586	14-7-0	14-7-14	OK	81.633	21.8897	-1.8989	1.78089	0.0749304	0.300779	no
Glyma01g02420	Glyma01g02420	Glyma01g02420	Gm01:1977639-1982632	14-7-0	14-7-14	OK	6.12413	3.39713	-0.85019	1.14215	0.253391	0.582625	no
Glyma01g02435	Glyma01g02435	Glyma01g02435	Gm01:1989327-1993130	14-7-0	14-7-14	NOTEST	0	0	0	0	1	1	no
Glyma01g02451	Glyma01g02451	Glyma01g02451	Gm01:1998300-2009388	14-7-0	14-7-14	NOTEST	0.121524	0.125605	0.047653	-0.0185455	0.985204	1	no
Glyma01g02465	Glyma01g02465	Glyma01g02465	Gm01:1998300-2009388	14-7-0	14-7-14	OK	6.60697	7.35587	0.154908	-0.147866	0.882448	0.963561	no
Glyma01g02480	Glyma01g02480	Glyma01g02480	Gm01:2010099-2018636	14-7-0	14-7-14	OK	19.2738	17.1133	-0.171519	0.225491	0.821597	0.94245	no
Glyma01g02510	Glyma01g02510	Glyma01g02510	Gm01:2033797-2034792	14-7-0	14-7-14	NOTEST	0	0.0436067	1.79769e+308	1.79769e+308	0.223676	1	no
Glyma01g02525	Glyma01g02525	Glyma01g02525	Gm01:2038298-2054214	14-7-0	14-7-14	NOTEST	0	0	0	0	1	1	no
Glyma01g02540	Glyma01g02540	Glyma01g02540	Gm01:2065426-2066242	14-7-0	14-7-14	NOTEST	0	0	0	0	1	1	no
Glyma01g02550	Glyma01g02550	Glyma01g02550	Gm01:2067340-2068207	14-7-0	14-7-14	NOTEST	0	0	0	0	1	1	no
Glyma01g02560	Glyma01g02560	Glyma01g02560	Gm01:2089449-2097520	14-7-0	14-7-14	NOTEST	0.0354418	0.285248	3.00869	-2.2121	0.0269597	1	no
Glyma01g02570	Glyma01g02570	Glyma01g02570	Gm01:2102150-2107115	14-7-0	14-7-14	OK	3.9079	6.56418	0.748222	-1.00408	0.315341	0.64711	no
Glyma01g02580	Glyma01g02580	Glyma01g02580	Gm01:2119856-2122838	14-7-0	14-7-14	OK	0.298874	44.2385	7.20962	-7.2562	3.98126e-13	1.50967e-09	yes
Glyma01g02610	Glyma01g02610	Glyma01g02610	Gm01:2137616-2139436	14-7-0	14-7-14	OK	0	1.48542	1.79769e+308	1.79769e+308	0.0114918	0.104711	no
Glyma01g02620	Glyma01g02620	Glyma01g02620	Gm01:2146050-2152449	14-7-0	14-7-14	NOTEST	0	0.0404992	1.79769e+308	1.79769e+308	0.0702947	1	no
Glyma01g02630	Glyma01g02630	Glyma01g02630	Gm01:2156930-2161301	14-7-0	14-7-14	OK	3.95434	2.68572	-0.558129	0.688199	0.491328	0.785556	no
Glyma01g02640	Glyma01g02640	Glyma01g02640	Gm01:2168404-2173706	14-7-0	14-7-14	OK	2.78725	7.75677	1.47661	-1.88655	0.0592203	0.262993	no
Glyma01g02660	Glyma01g02660	Glyma01g02660	Gm01:2184322-2188837	14-7-0	14-7-14	OK	8.11855	6.42865	-0.336706	0.410157	0.681691	0.886133	no
Glyma01g02670	Glyma01g02670	Glyma01g02670	Gm01:2192165-2194689	14-7-0	14-7-14	OK	21.0842	13.7445	-0.617308	0.849023	0.395868	0.717473	no
Glyma01g02691	Glyma01g02691	Glyma01g02691	Gm01:2199760-2201127	14-7-0	14-7-14	OK	2.03879	1.73811	-0.230195	0.231521	0.81691	0.94113	no
Glyma01g02710	Glyma01g02710	Glyma01g02710	Gm01:2204078-2206129	14-7-0	14-7-14	NOTEST	0	0	0	0	1	1	no
Glyma01g02720	Glyma01g02720	Glyma01g02720	Gm01:2204078-2206129	14-7-0	14-7-14	OK	32.7029	29.6887	-0.139503	0.197238	0.843641	0.95136	no
Glyma01g02740	Glyma01g02740	Glyma01g02740	Gm01:2209772-2211864	14-7-0	14-7-14	OK	0.497557	0.96477	0.955325	-0.936358	0.349089	0.677844	no
Glyma01g02750	Glyma01g02750	Glyma01g02750	Gm01:2228817-2234268	14-7-0	14-7-14	OK	0.298902	1.01575	1.7648	-1.69969	0.0891889	0.332296	no
Glyma01g02760	Glyma01g02760	Glyma01g02760	Gm01:2239126-2244480	14-7-0	14-7-14	NOTEST	0	0.147739	1.79769e+308	1.79769e+308	0.0450558	1	no
Glyma01g02780	Glyma01g02780	Glyma01g02780	Gm01:2274285-2279870	14-7-0	14-7-14	OK	7.89242	12.6118	0.676238	-0.929504	0.352628	0.681214	no
Glyma01g02790	Glyma01g02790	Glyma01g02790	Gm01:2280412-2286189	14-7-0	14-7-14	OK	0.0888629	1.28142	3.85002	-3.40561	0.000660164	0.0160277	yes
Glyma01g02800	Glyma01g02800	Glyma01g02800	Gm01:2289835-2296934	14-7-0	14-7-14	OK	2.77496	2.44	-0.185581	0.247803	0.804287	0.936536	no
Glyma01g02810	Glyma01g02810	Glyma01g02810	Gm01:2296971-2301386	14-7-0	14-7-14	NOTEST	0.0228736	0.220245	3.26735	-2.42349	0.015372	1	no
Glyma01g02820	Glyma01g02820	Glyma01g02820	Gm01:2307249-2310533	14-7-0	14-7-14	OK	11.6637	11.5438	-0.0149031	0.0211927	0.983092	0.994967	no
Glyma01g02830	Glyma01g02830	Glyma01g02830	Gm01:2320650-2323809	14-7-0	14-7-14	NOTEST	0	0	0	0	1	1	no
Glyma01g02840	Glyma01g02840	Glyma01g02840	Gm01:2324547-2332128	14-7-0	14-7-14	OK	19.3483	2.30221	-3.07112	3.57461	0.00035075	0.0102783	yes
Glyma01g02850	Glyma01g02850	Glyma01g02850	Gm01:2336135-2340956	14-7-0	14-7-14	OK	35.2996	58.7994	0.736152	-0.735923	0.461778	0.765716	no
Glyma01g02880	Glyma01g02880	Glyma01g02880	Gm01:2360197-2366406	14-7-0	14-7-14	OK	18.1695	8.3137	-1.12796	1.21872	0.222949	0.547768	no
Glyma01g02890	Glyma01g02890	Glyma01g02890	Gm01:2373884-2395585	14-7-0	14-7-14	OK	2.61961	1.632	-0.682709	0.940621	0.346899	0.675626	no
Glyma01g02900	Glyma01g02900	Glyma01g02900	Gm01:2398001-2407368	14-7-0	14-7-14	OK	2.10112	1.69509	-0.309796	0.301089	0.763346	0.921578	no
Glyma01g02920	Glyma01g02920	Glyma01g02920	Gm01:2419558-2420449	14-7-0	14-7-14	OK	2.02008	1.64877	-0.293019	0.293201	0.769368	0.924005	no
Glyma01g02930	Glyma01g02930	Glyma01g02930	Gm01:2424756-2426304	14-7-0	14-7-14	NOTEST	0.17829	0.17464	-0.0298425	0.0218347	0.98258	1	no
Glyma01g02941	Glyma01g02941	Glyma01g02941	Gm01:2426753-2435682	14-7-0	14-7-14	OK	2.31474	2.03524	-0.18565	0.251329	0.80156	0.935911	no
Glyma01g02950	Glyma01g02950	Glyma01g02950	Gm01:2448362-2450139	14-7-0	14-7-14	OK	34.4756	41.8818	0.280749	-0.35212	0.724748	0.90505	no
Glyma01g02963	Glyma01g02963	Glyma01g02963	Gm01:2455817-2458234	14-7-0	14-7-14	NOTEST	0.0457346	0.0950433	1.0553	-0.712151	0.476371	1	no
Glyma01g02976	Glyma01g02976	Glyma01g02976	Gm01:2465269-2466518	14-7-0	14-7-14	NOTEST	0	0	0	0	1	1	no
Glyma01g02990	Glyma01g02990	Glyma01g02990	Gm01:2477179-2479230	14-7-0	14-7-14	OK	0.340283	2.53455	2.89692	-2.71625	0.00660269	0.0748029	no
Glyma01g03005	Glyma01g03005	Glyma01g03005	Gm01:2495435-2497366	14-7-0	14-7-14	NOTEST	0.218172	0.101295	-1.1069	0.851961	0.394236	1	no
Glyma01g03020	Glyma01g03020	Glyma01g03020	Gm01:2497579-2500150	14-7-0	14-7-14	OK	12.8129	9.3071	-0.461196	0.644754	0.519087	0.801231	no
Glyma01g03030	Glyma01g03030	Glyma01g03030	Gm01:2522226-2524933	14-7-0	14-7-14	OK	2.29778	1.56708	-0.552164	0.627497	0.530334	0.808043	no
Glyma01g03040	Glyma01g03040	Glyma01g03040	Gm01:2530562-2537849	14-7-0	14-7-14	NOTEST	0	0.406941	1.79769e+308	1.79769e+308	0.0342994	1	no
Glyma01g03050	Glyma01g03050	Glyma01g03050	Gm01:2543533-2544636	14-7-0	14-7-14	NOTEST	0	0	0	0	1	1	no
Glyma01g03060	Glyma01g03060	Glyma01g03060	Gm01:2551019-2553294	14-7-0	14-7-14	NOTEST	0.0458975	0.317583	2.79065	-2.0483	0.0405308	1	no
Glyma01g03070	Glyma01g03070	Glyma01g03070	Gm01:2585415-2586673	14-7-0	14-7-14	OK	283.55	681.181	1.26443	-1.08996	0.275731	0.606485	no
Glyma01g03090	Glyma01g03090	Glyma01g03090	Gm01:2600263-2605224	14-7-0	14-7-14	OK	4.744	3.66509	-0.372255	0.500699	0.616583	0.854805	no
Glyma01g03100	Glyma01g03100	Glyma01g03100	Gm01:2633476-2636259	14-7-0	14-7-14	OK	1.72873	3.14335	0.86259	-1.02993	0.303041	0.634397	no
Glyma01g03110	Glyma01g03110	Glyma01g03110	Gm01:2667742-2669323	14-7-0	14-7-14	NOTEST	0	0.0219897	1.79769e+308	1.79769e+308	0.33937	1	no
Glyma01g03120	Glyma01g03120	Glyma01g03120	Gm01:2683531-2686001	14-7-0	14-7-14	OK	2.0431	3.9836	0.963311	-1.09367	0.274098	0.605091	no
Glyma01g03130	Glyma01g03130	Glyma01g03130	Gm01:2686762-2690092	14-7-0	14-7-14	OK	3.36664	4.79487	0.510183	-0.686542	0.492371	0.785556	no
Glyma01g03140	Glyma01g03140	Glyma01g03140	Gm01:2696508-2700015	14-7-0	14-7-14	LOWDATA	0	0	-1.86086	0	1	1	no
Glyma01g03150	Glyma01g03150	Glyma01g03150	Gm01:2696508-2700015	14-7-0	14-7-14	OK	59.0011	16.2437	-1.86086	1.83088	0.0671188	0.281445	no
Glyma01g03160	Glyma01g03160	Glyma01g03160	Gm01:2716401-2724818	14-7-0	14-7-14	OK	27.4492	13.2911	-1.04631	1.23255	0.217743	0.540792	no
Glyma01g03180	Glyma01g03180	Glyma01g03180	Gm01:2725857-2728953	14-7-0	14-7-14	OK	73.5412	16.3381	-2.17031	2.71483	0.00663097	0.0750137	no
Glyma01g03190	Glyma01g03190	Glyma01g03190	Gm01:2731349-2739464	14-7-0	14-7-14	OK	0.592936	2.69457	2.1841	-2.37704	0.0174521	0.134767	no
Glyma01g03200	Glyma01g03200	Glyma01g03200	Gm01:2741979-2744444	14-7-0	14-7-14	NOTEST	0	0	0	0	1	1	no
Glyma01g03210	Glyma01g03210	Glyma01g03210	Gm01:2749285-2751625	14-7-0	14-7-14	OK	0.39612	0.832674	1.07181	-1.0587	0.289737	0.621064	no
Glyma01g03220	Glyma01g03220	Glyma01g03220	Gm01:2752604-2755538	14-7-0	14-7-14	OK	8.00039	7.38643	-0.115194	0.163155	0.870396	0.960625	no
Glyma01g03240	Glyma01g03240	Glyma01g03240	Gm01:2765558-2766634	14-7-0	14-7-14	NOTEST	0	0.230089	1.79769e+308	1.79769e+308	0.0644759	1	no
Glyma01g03260	Glyma01g03260	Glyma01g03260	Gm01:2784884-2792465	14-7-0	14-7-14	OK	609.606	203.938	-1.57975	1.0122	0.311442	0.643038	no
Glyma01g03270	Glyma01g03270	Glyma01g03270	Gm01:2803081-2807357	14-7-0	14-7-14	OK	4.14836	3.84393	-0.109958	0.144144	0.885387	0.964839	no
Glyma01g03281	Glyma01g03281	Glyma01g03281	Gm01:2811064-2811250	14-7-0	14-7-14	NOTEST	0	0	0	0	1	1	no
Glyma01g03290	Glyma01g03290	Glyma01g03290	Gm01:2814292-2814876	14-7-0	14-7-14	NOTEST	0	0	0	0	1	1	no
Glyma01g03301	Glyma01g03301	Glyma01g03301	Gm01:2815679-2817384	14-7-0	14-7-14	NOTEST	0	0.100065	1.79769e+308	1.79769e+308	0.0940746	1	no
Glyma01g03310	Glyma01g03310	Glyma01g03310	Gm01:2820282-2822588	14-7-0	14-7-14	NOTEST	0	0	0	0	1	1	no
Glyma01g03321	Glyma01g03321	Glyma01g03321	Gm01:2825602-2830330	14-7-0	14-7-14	NOTEST	0	0	0	0	1	1	no
Glyma01g03330	Glyma01g03330	Glyma01g03330	Gm01:2836050-2840937	14-7-0	14-7-14	OK	3.19792	6.54339	1.03291	-1.38855	0.16497	0.46791	no
Glyma01g03340	Glyma01g03340	Glyma01g03340	Gm01:2843206-2846996	14-7-0	14-7-14	NOTEST	0	0	0	0	1	1	no
Glyma01g03360	Glyma01g03360	Glyma01g03360	Gm01:2857640-2860816	14-7-0	14-7-14	OK	17.4383	2.68021	-2.70184	2.94151	0.00326621	0.0475578	yes
Glyma01g03371	Glyma01g03371	Glyma01g03371	Gm01:2868081-2871591	14-7-0	14-7-14	NOTEST	0.269646	0.166697	-0.693844	0.405901	0.684815	1	no
Glyma01g03380	Glyma01g03380	Glyma01g03380	Gm01:2872827-2875983	14-7-0	14-7-14	OK	6.26816	5.92832	-0.0804207	0.104968	0.916401	0.97416	no
Glyma01g03390	Glyma01g03390	Glyma01g03390	Gm01:2879282-2884236	14-7-0	14-7-14	OK	0.950043	0.723529	-0.392942	0.400882	0.688507	0.888559	no
Glyma01g03400	Glyma01g03400	Glyma01g03400	Gm01:2895941-2899203	14-7-0	14-7-14	NOTEST	0	0.0218957	1.79769e+308	1.79769e+308	0.223676	1	no
Glyma01g03410	Glyma01g03410	Glyma01g03410	Gm01:2907608-2911173	14-7-0	14-7-14	NOTEST	0	0	0	0	1	1	no
Glyma01g03420	Glyma01g03420	Glyma01g03420	Gm01:2912689-2918182	14-7-0	14-7-14	OK	1.61305	3.73302	1.21055	-1.50577	0.132126	0.414415	no
Glyma01g03430	Glyma01g03430	Glyma01g03430	Gm01:2918596-2922169	14-7-0	14-7-14	OK	7.60081	2.80919	-1.436	1.70721	0.0877821	0.32948	no
Glyma01g03450	Glyma01g03450	Glyma01g03450	Gm01:2932298-2941083	14-7-0	14-7-14	NOTEST	0	0	0	0	1	1	no
Glyma01g03470	Glyma01g03470	Glyma01g03470	Gm01:2983533-2985063	14-7-0	14-7-14	OK	3.63896	1.42223	-1.35538	1.34293	0.179295	0.490109	no
Glyma01g03480	Glyma01g03480	Glyma01g03480	Gm01:2985878-2990726	14-7-0	14-7-14	OK	1.09259	6.44371	2.56014	-3.09731	0.00195285	0.0339342	yes
Glyma01g03490	Glyma01g03490	Glyma01g03490	Gm01:2997710-3004125	14-7-0	14-7-14	OK	6.30104	7.89179	0.324761	-0.461217	0.644643	0.867866	no
Glyma01g03500	Glyma01g03500	Glyma01g03500	Gm01:3020777-3022182	14-7-0	14-7-14	OK	3.54691	3.11793	-0.185973	0.231355	0.817039	0.94113	no
Glyma01g03530	Glyma01g03530	Glyma01g03530	Gm01:3043747-3048064	14-7-0	14-7-14	OK	10.7865	15.0735	0.482789	-0.680344	0.496287	0.787088	no
Glyma01g03540	Glyma01g03540	Glyma01g03540	Gm01:3063216-3065991	14-7-0	14-7-14	OK	8.03269	7.89952	-0.0241174	0.0335403	0.973244	0.992453	no
Glyma01g03550	Glyma01g03550	Glyma01g03550	Gm01:3067764-3073752	14-7-0	14-7-14	OK	27.1455	15.8083	-0.78003	1.08681	0.27712	0.607947	no
Glyma01g03570	Glyma01g03570	Glyma01g03570	Gm01:3082363-3083185	14-7-0	14-7-14	OK	294.647	79.646	-1.88731	2.08618	0.0369625	0.202717	no
Glyma01g03580	Glyma01g03580	Glyma01g03580	Gm01:3090805-3093412	14-7-0	14-7-14	NOTEST	0.0831766	0.0507577	-0.71255	0.31525	0.752572	1	no
Glyma01g03590	Glyma01g03590	Glyma01g03590	Gm01:3106546-3108525	14-7-0	14-7-14	OK	20.8207	22.1318	0.0881013	-0.1241	0.901236	0.970341	no
Glyma01g03600	Glyma01g03600	Glyma01g03600	Gm01:3114320-3119083	14-7-0	14-7-14	OK	18.1361	4.48427	-2.01592	2.23464	0.0254409	0.167809	no
Glyma01g03610	Glyma01g03610	Glyma01g03610	Gm01:3120584-3124029	14-7-0	14-7-14	OK	17.1325	12.8946	-0.409974	0.582178	0.560447	0.824767	no
Glyma01g03621	Glyma01g03621	Glyma01g03621	Gm01:3124253-3126137	14-7-0	14-7-14	OK	0.781534	0.561302	-0.477531	0.421952	0.67306	0.881988	no
Glyma01g03630	Glyma01g03630	Glyma01g03630	Gm01:3127061-3127831	14-7-0	14-7-14	NOTEST	0	0	0	0	1	1	no
Glyma01g03650	Glyma01g03650	Glyma01g03650	Gm01:3132200-3135385	14-7-0	14-7-14	OK	54.8635	44.4539	-0.303535	0.339067	0.734559	0.909491	no
Glyma01g03661	Glyma01g03661	Glyma01g03661	Gm01:3135687-3141621	14-7-0	14-7-14	NOTEST	0	0.015468	1.79769e+308	1.79769e+308	0.412506	1	no
Glyma01g03670	Glyma01g03670	Glyma01g03670	Gm01:3144701-3145778	14-7-0	14-7-14	OK	0.115334	1.78637	3.95313	-3.0097	0.00261504	0.0411876	yes
Glyma01g03690	Glyma01g03690	Glyma01g03690	Gm01:3152038-3157769	14-7-0	14-7-14	NOTEST	0	0	0	0	1	1	no
Glyma01g03700	Glyma01g03700	Glyma01g03700	Gm01:3162858-3164334	14-7-0	14-7-14	OK	2.85269	1.22235	-1.22267	1.34592	0.178328	0.488774	no
Glyma01g03710	Glyma01g03710	Glyma01g03710	Gm01:3167711-3172458	14-7-0	14-7-14	OK	6.67171	1.82822	-1.86762	1.85535	0.0635464	0.27373	no
Glyma01g03720	Glyma01g03720	Glyma01g03720	Gm01:3174000-3185126	14-7-0	14-7-14	OK	94.8276	25.6661	-1.88545	2.11992	0.034013	0.194185	no
Glyma01g03730	Glyma01g03730	Glyma01g03730	Gm01:3187344-3190927	14-7-0	14-7-14	OK	19.0158	9.98708	-0.929061	1.29755	0.194441	0.511569	no
Glyma01g03750	Glyma01g03750	Glyma01g03750	Gm01:3193903-3200492	14-7-0	14-7-14	OK	27.5201	8.35454	-1.71985	2.36251	0.0181518	0.137955	no
Glyma01g03760	Glyma01g03760	Glyma01g03760	Gm01:3219159-3222449	14-7-0	14-7-14	OK	2.72273	2.2928	-0.247947	0.331909	0.739958	0.911864	no
Glyma01g03780	Glyma01g03780	Glyma01g03780	Gm01:3233213-3235819	14-7-0	14-7-14	OK	2.36234	0.362992	-2.70221	1.27178	0.203451	0.522824	no
Glyma01g03790	Glyma01g03790	Glyma01g03790	Gm01:3242605-3245458	14-7-0	14-7-14	NOTEST	0.0378558	0.0468215	0.306655	-0.203984	0.838366	1	no
Glyma01g03810	Glyma01g03810	Glyma01g03810	Gm01:3249405-3255967	14-7-0	14-7-14	OK	40.3519	17.3053	-1.22143	1.24986	0.21135	0.532576	no
Glyma01g03820	Glyma01g03820	Glyma01g03820	Gm01:3263267-3267637	14-7-0	14-7-14	OK	2.08261	5.06101	1.28104	-1.65267	0.0983972	0.351336	no
Glyma01g03830	Glyma01g03830	Glyma01g03830	Gm01:3283632-3286899	14-7-0	14-7-14	OK	7.32627	8.30836	0.181485	-0.252855	0.80038	0.935553	no
Glyma01g03850	Glyma01g03850	Glyma01g03850	Gm01:3312867-3318968	14-7-0	14-7-14	OK	4.16011	2.21638	-0.908416	1.17409	0.240358	0.567686	no
Glyma01g03870	Glyma01g03870	Glyma01g03870	Gm01:3327064-3332585	14-7-0	14-7-14	OK	3.12383	1.44145	-1.1158	1.43128	0.15235	0.44848	no
Glyma01g03880	Glyma01g03880	Glyma01g03880	Gm01:3348917-3352335	14-7-0	14-7-14	OK	0.645582	4.60366	2.83411	-3.23973	0.00119641	0.0241338	yes
Glyma01g03890	Glyma01g03890	Glyma01g03890	Gm01:3359534-3372620	14-7-0	14-7-14	OK	4.06793	5.48663	0.431626	-0.613363	0.539636	0.812114	no
Glyma01g03900	Glyma01g03900	Glyma01g03900	Gm01:3378305-3380122	14-7-0	14-7-14	OK	0.0594607	0.56469	3.24745	-2.40214	0.0162993	0.128971	no
Glyma01g03910	Glyma01g03910	Glyma01g03910	Gm01:3381988-3384388	14-7-0	14-7-14	OK	0.214582	1.40795	2.714	-2.40419	0.0162082	0.128749	no
Glyma01g03921	Glyma01g03921	Glyma01g03921	Gm01:3390102-3396781	14-7-0	14-7-14	NOTEST	0	0.398412	1.79769e+308	1.79769e+308	0.0268447	1	no
Glyma01g03930	Glyma01g03930	Glyma01g03930	Gm01:3400476-3411080	14-7-0	14-7-14	OK	17.7846	15.223	-0.224382	0.297912	0.76577	0.922735	no
Glyma01g03940	Glyma01g03940	Glyma01g03940	Gm01:3413504-3415979	14-7-0	14-7-14	OK	0.305102	2.1743	2.83319	-2.7547	0.00587457	0.0695317	no
Glyma01g03948	Glyma01g03948	Glyma01g03948	Gm01:3423773-3425166	14-7-0	14-7-14	OK	0.242303	1.36989	2.49918	-1.97179	0.048634	0.235123	no
Glyma01g03956	Glyma01g03956	Glyma01g03956	Gm01:3431068-3433014	14-7-0	14-7-14	OK	6.90481	10.6097	0.619709	-0.829532	0.406804	0.726058	no
Glyma01g03964	Glyma01g03964	Glyma01g03964	Gm01:3433091-3436594	14-7-0	14-7-14	OK	0.418528	1.90195	2.18408	-2.3334	0.019627	0.14489	no
Glyma01g03972	Glyma01g03972	Glyma01g03972	Gm01:3439667-3441084	14-7-0	14-7-14	NOTEST	0	0	0	0	1	1	no
Glyma01g03980	Glyma01g03980	Glyma01g03980	Gm01:3455191-3461955	14-7-0	14-7-14	OK	0.747971	1.63002	1.12384	-1.41188	0.157985	0.457261	no
Glyma01g04000	Glyma01g04000	Glyma01g04000	Gm01:3487914-3494204	14-7-0	14-7-14	OK	0.262156	0.518208	0.983106	-0.990828	0.32177	0.652831	no
Glyma01g04015	Glyma01g04015	Glyma01g04015	Gm01:3502393-3507947	14-7-0	14-7-14	NOTEST	0.0749113	0.232852	1.63616	-1.14239	0.253292	1	no
Glyma01g04030	Glyma01g04030	Glyma01g04030	Gm01:3513144-3513438	14-7-0	14-7-14	NOTEST	0	0	0	0	1	1	no
Glyma01g04040	Glyma01g04040	Glyma01g04040	Gm01:3514698-3521382	14-7-0	14-7-14	OK	1.32643	3.61066	1.44471	-1.52505	0.127245	0.405704	no
Glyma01g04050	Glyma01g04050	Glyma01g04050	Gm01:3524004-3527778	14-7-0	14-7-14	OK	69.2947	39.8771	-0.797183	1.0231	0.306259	0.637772	no
Glyma01g04060	Glyma01g04060	Glyma01g04060	Gm01:3533389-3537718	14-7-0	14-7-14	OK	7.57403	12.0709	0.672395	-0.949796	0.342216	0.671251	no
Glyma01g04070	Glyma01g04070	Glyma01g04070	Gm01:3541049-3543307	14-7-0	14-7-14	OK	2.14995	8.86923	2.04451	-2.33183	0.0197094	0.145178	no
Glyma01g04080	Glyma01g04080	Glyma01g04080	Gm01:3552334-3560811	14-7-0	14-7-14	OK	0.556238	2.37367	2.09334	-1.65637	0.0976473	0.349498	no
Glyma01g04090	Glyma01g04090	Glyma01g04090	Gm01:3552334-3560811	14-7-0	14-7-14	OK	1.96227	1.76953	-0.149158	0.11497	0.908469	0.972105	no
Glyma01g04100	Glyma01g04100	Glyma01g04100	Gm01:3565109-3567816	14-7-0	14-7-14	OK	1.75817	3.7189	1.08081	-1.34968	0.177117	0.486899	no
Glyma01g04107	Glyma01g04107	Glyma01g04107	Gm01:3570498-3572031	14-7-0	14-7-14	OK	1.63763	0.785814	-1.05935	1.00034	0.317147	0.648822	no
Glyma01g04114	Glyma01g04114	Glyma01g04114	Gm01:3573892-3576381	14-7-0	14-7-14	NOTEST	0	0	0	0	1	1	no
Glyma01g04122	Glyma01g04122	Glyma01g04122	Gm01:3576871-3579242	14-7-0	14-7-14	NOTEST	0.0582365	0.468342	3.00757	-2.21127	0.027017	1	no
Glyma01g04130	Glyma01g04130	Glyma01g04130	Gm01:3588235-3590927	14-7-0	14-7-14	OK	29.0971	6.12472	-2.24816	3.01931	0.00253349	0.0401808	yes
Glyma01g04140	Glyma01g04140	Glyma01g04140	Gm01:3593852-3595627	14-7-0	14-7-14	OK	7.17359	1.03145	-2.79802	3.04867	0.00229855	0.037766	yes
Glyma01g04151	Glyma01g04151	Glyma01g04151	Gm01:3601850-3604249	14-7-0	14-7-14	OK	1.46602	4.51979	1.62435	-1.93189	0.053373	0.247511	no
Glyma01g04160	Glyma01g04160	Glyma01g04160	Gm01:3614505-3619208	14-7-0	14-7-14	NOTEST	0	0.0550152	1.79769e+308	1.79769e+308	0.150395	1	no
Glyma01g04170	Glyma01g04170	Glyma01g04170	Gm01:3622380-3627999	14-7-0	14-7-14	OK	23.6366	20.7548	-0.187575	0.217971	0.827451	0.945299	no
Glyma01g04190	Glyma01g04190	Glyma01g04190	Gm01:3657972-3659933	14-7-0	14-7-14	OK	1.83138	4.58413	1.32371	-1.52016	0.128471	0.408298	no
Glyma01g04200	Glyma01g04200	Glyma01g04200	Gm01:3671722-3676091	14-7-0	14-7-14	NOTEST	0.100105	0.139476	0.478507	-0.401319	0.688185	1	no
Glyma01g04210	Glyma01g04210	Glyma01g04210	Gm01:3695969-3699966	14-7-0	14-7-14	LOWDATA	0	0	-0.120768	0	1	1	no
Glyma01g04220	Glyma01g04220	Glyma01g04220	Gm01:3695969-3699966	14-7-0	14-7-14	NOTEST	0.131175	0.120641	-0.120768	0.0923913	0.926387	1	no
Glyma01g04230	Glyma01g04230	Glyma01g04230	Gm01:3717479-3721262	14-7-0	14-7-14	OK	9.98873	6.79465	-0.555903	0.786953	0.431309	0.744451	no
Glyma01g04241	Glyma01g04241	Glyma01g04241	Gm01:3734519-3735893	14-7-0	14-7-14	OK	0.539392	0.654752	0.279614	-0.252905	0.800342	0.935553	no
Glyma01g04250	Glyma01g04250	Glyma01g04250	Gm01:3750043-3752379	14-7-0	14-7-14	OK	0.889153	2.06197	1.21352	-1.32516	0.18512	0.49909	no
Glyma01g04261	Glyma01g04261	Glyma01g04261	Gm01:3767622-3769840	14-7-0	14-7-14	NOTEST	0	0.0473507	1.79769e+308	1.79769e+308	0.141284	1	no
Glyma01g04270	Glyma01g04270	Glyma01g04270	Gm01:3770398-3790851	14-7-0	14-7-14	OK	7.11882	3.85173	-0.886131	1.11217	0.266064	0.596823	no
Glyma01g04285	Glyma01g04285	Glyma01g04285	Gm01:3792928-3793735	14-7-0	14-7-14	OK	2.25724	0	-1.79769e+308	-1.79769e+308	0.025171	0.166991	no
Glyma01g04300	Glyma01g04300	Glyma01g04300	Gm01:3800482-3805133	14-7-0	14-7-14	OK	3.16349	6.25252	0.982922	-1.20923	0.226575	0.551058	no
Glyma01g04310	Glyma01g04310	Glyma01g04310	Gm01:3839061-3840278	14-7-0	14-7-14	NOTEST	0	0	0	0	1	1	no
Glyma01g04320	Glyma01g04320	Glyma01g04320	Gm01:3843990-3851452	14-7-0	14-7-14	OK	12.9696	8.1555	-0.669291	0.862897	0.388194	0.711889	no
Glyma01g04330	Glyma01g04330	Glyma01g04330	Gm01:3875178-3876239	14-7-0	14-7-14	OK	0.506663	0.741941	0.550279	-0.400055	0.689116	0.88865	no
Glyma01g04335	Glyma01g04335	Glyma01g04335	Gm01:3875178-3876239	14-7-0	14-7-14	OK	0	6.36524	1.79769e+308	1.79769e+308	0.167962	0.472789	no
Glyma01g04340	Glyma01g04340	Glyma01g04340	Gm01:3894968-3896837	14-7-0	14-7-14	OK	0.516484	0.20746	-1.31589	1.12967	0.258616	0.588841	no
Glyma01g04350	Glyma01g04350	Glyma01g04350	Gm01:3901049-3902869	14-7-0	14-7-14	OK	32.0256	1.51246	-4.40426	5.24282	1.58142e-07	2.92188e-05	yes
Glyma01g04361	Glyma01g04361	Glyma01g04361	Gm01:3905975-3906745	14-7-0	14-7-14	NOTEST	0	0	0	0	1	1	no
Glyma01g04370	Glyma01g04370	Glyma01g04370	Gm01:3910797-3912019	14-7-0	14-7-14	OK	3.32449	0.0557879	-5.89704	3.99574	6.44928e-05	0.00301301	yes
Glyma01g04380	Glyma01g04380	Glyma01g04380	Gm01:3925166-3926952	14-7-0	14-7-14	OK	1.43032	2.4418	0.771607	-0.862218	0.388568	0.712003	no
Glyma01g04400	Glyma01g04400	Glyma01g04400	Gm01:3936729-3941417	14-7-0	14-7-14	OK	13.5106	19.039	0.494866	-0.684089	0.493919	0.786134	no
Glyma01g04410	Glyma01g04410	Glyma01g04410	Gm01:3950636-3955032	14-7-0	14-7-14	OK	4.15001	2.16143	-0.941132	1.1243	0.260887	0.591376	no
Glyma01g04421	Glyma01g04421	Glyma01g04421	Gm01:3965515-3967099	14-7-0	14-7-14	NOTEST	0.200408	0.395542	0.980889	-0.767325	0.442888	1	no
Glyma01g04430	Glyma01g04430	Glyma01g04430	Gm01:3981173-3984324	14-7-0	14-7-14	NOTEST	0.0318937	0.357042	3.48475	-2.60463	0.00919734	1	no
Glyma01g04440	Glyma01g04440	Glyma01g04440	Gm01:3984541-3989981	14-7-0	14-7-14	OK	4.59848	9.13343	0.990001	-1.31212	0.189479	0.504792	no
Glyma01g04450	Glyma01g04450	Glyma01g04450	Gm01:3990476-3991986	14-7-0	14-7-14	OK	0.244341	1.41379	2.5326	-2.22275	0.0262325	0.170147	no
Glyma01g04460	Glyma01g04460	Glyma01g04460	Gm01:3993484-3995564	14-7-0	14-7-14	OK	13.6939	13.8126	0.0124572	-0.0174352	0.986089	0.995741	no
Glyma01g04468	Glyma01g04468	Glyma01g04468	Gm01:4005281-4011408	14-7-0	14-7-14	OK	2.27323	1.29647	-0.810159	0.707871	0.479025	0.776305	no
Glyma01g04476	Glyma01g04476	Glyma01g04476	Gm01:4012612-4020206	14-7-0	14-7-14	OK	5.44817	6.02407	0.144966	-0.20517	0.837439	0.94908	no
Glyma01g04484	Glyma01g04484	Glyma01g04484	Gm01:4023641-4024312	14-7-0	14-7-14	OK	12.1779	4.13684	-1.55767	1.60952	0.107502	0.369812	no
Glyma01g04492	Glyma01g04492	Glyma01g04492	Gm01:4024327-4035566	14-7-0	14-7-14	OK	4.28492	6.3187	0.56036	-0.792815	0.427886	0.741862	no
Glyma01g04500	Glyma01g04500	Glyma01g04500	Gm01:4070066-4074636	14-7-0	14-7-14	OK	0.594017	0.643816	0.116146	-0.119006	0.905271	0.971486	no
Glyma01g04515	Glyma01g04515	Glyma01g04515	Gm01:4094045-4096371	14-7-0	14-7-14	OK	3.15342	2.85989	-0.140958	0.189275	0.849877	0.953891	no
Glyma01g04530	Glyma01g04530	Glyma01g04530	Gm01:4108620-4111438	14-7-0	14-7-14	OK	93.1865	64.879	-0.522369	0.566636	0.570961	0.830797	no
Glyma01g04545	Glyma01g04545	Glyma01g04545	Gm01:4119639-4119995	14-7-0	14-7-14	NOTEST	0	0	0	0	1	1	no
Glyma01g04560	Glyma01g04560	Glyma01g04560	Gm01:4134768-4138744	14-7-0	14-7-14	OK	3.80249	5.07145	0.415454	-0.494973	0.620619	0.856662	no
Glyma01g04570	Glyma01g04570	Glyma01g04570	Gm01:4140494-4144862	14-7-0	14-7-14	OK	9.96179	11.278	0.179034	-0.228522	0.819241	0.941753	no
Glyma01g04580	Glyma01g04580	Glyma01g04580	Gm01:4160568-4163236	14-7-0	14-7-14	OK	0.307751	1.80804	2.55459	-2.42075	0.0154886	0.12547	no
Glyma01g04590	Glyma01g04590	Glyma01g04590	Gm01:4190455-4199176	14-7-0	14-7-14	OK	1.03417	1.64521	0.669803	-0.873505	0.382388	0.706351	no
Glyma01g04600	Glyma01g04600	Glyma01g04600	Gm01:4213202-4215294	14-7-0	14-7-14	OK	8.47589	9.55911	0.173513	-0.23099	0.817323	0.941153	no
Glyma01g04610	Glyma01g04610	Glyma01g04610	Gm01:4217440-4221353	14-7-0	14-7-14	OK	1.93865	3.98705	1.04027	-1.23769	0.215832	0.537983	no
Glyma01g04616	Glyma01g04616	Glyma01g04616	Gm01:4234777-4236309	14-7-0	14-7-14	NOTEST	0	0	0	0	1	1	no
Glyma01g04623	Glyma01g04623	Glyma01g04623	Gm01:4248628-4253094	14-7-0	14-7-14	NOTEST	0	0	0	0	1	1	no
Glyma01g04630	Glyma01g04630	Glyma01g04630	Gm01:4267486-4273671	14-7-0	14-7-14	OK	0.803642	2.1967	1.45071	-1.69171	0.0907007	0.335323	no
Glyma01g04640	Glyma01g04640	Glyma01g04640	Gm01:4278592-4280521	14-7-0	14-7-14	NOTEST	0.0551478	0.236544	2.10073	-1.50987	0.131078	1	no
Glyma01g04650	Glyma01g04650	Glyma01g04650	Gm01:4282743-4288290	14-7-0	14-7-14	NOTEST	0	0	0	0	1	1	no
Glyma01g04660	Glyma01g04660	Glyma01g04660	Gm01:4294494-4299400	14-7-0	14-7-14	OK	0.610443	1.85885	1.60648	-1.67841	0.0932677	0.341462	no
Glyma01g04670	Glyma01g04670	Glyma01g04670	Gm01:4302121-4303918	14-7-0	14-7-14	OK	0.169875	0.567877	1.7411	-1.40127	0.161135	0.461961	no
Glyma01g04690	Glyma01g04690	Glyma01g04690	Gm01:4314360-4316230	14-7-0	14-7-14	OK	3.76765	5.90474	0.648211	-0.811016	0.417357	0.734242	no
Glyma01g04700	Glyma01g04700	Glyma01g04700	Gm01:4319542-4321677	14-7-0	14-7-14	NOTEST	0	0	0	0	1	1	no
Glyma01g04710	Glyma01g04710	Glyma01g04710	Gm01:4323773-4325439	14-7-0	14-7-14	OK	186.601	60.9123	-1.61515	1.87906	0.0602359	0.265306	no
Glyma01g04720	Glyma01g04720	Glyma01g04720	Gm01:4331150-4337114	14-7-0	14-7-14	OK	2.94598	7.05568	1.26004	-1.70794	0.0876475	0.329124	no
Glyma01g04730	Glyma01g04730	Glyma01g04730	Gm01:4347876-4356892	14-7-0	14-7-14	OK	1.53957	2.43941	0.664	-0.823408	0.410276	0.729242	no
Glyma01g04740	Glyma01g04740	Glyma01g04740	Gm01:4358996-4361499	14-7-0	14-7-14	OK	1.60674	1.36904	-0.23097	0.243928	0.807287	0.93759	no
Glyma01g04750	Glyma01g04750	Glyma01g04750	Gm01:4367348-4370072	14-7-0	14-7-14	OK	0.189275	1.49298	2.97964	-2.65839	0.00785144	0.0828811	no
Glyma01g04760	Glyma01g04760	Glyma01g04760	Gm01:4370091-4371490	14-7-0	14-7-14	OK	21.0242	28.0696	0.416958	-0.592746	0.553351	0.820766	no
Glyma01g04770	Glyma01g04770	Glyma01g04770	Gm01:4372756-4380517	14-7-0	14-7-14	NOTEST	0	0	0	0	1	1	no
Glyma01g04780	Glyma01g04780	Glyma01g04780	Gm01:4372756-4380517	14-7-0	14-7-14	NOTEST	0	0.20833	1.79769e+308	1.79769e+308	0.305473	1	no
Glyma01g04791	Glyma01g04791	Glyma01g04791	Gm01:4372756-4380517	14-7-0	14-7-14	OK	0.721226	0.299604	-1.26739	1.31934	0.187054	0.501413	no
Glyma01g04800	Glyma01g04800	Glyma01g04800	Gm01:4381634-4382677	14-7-0	14-7-14	NOTEST	0	0	0	0	1	1	no
Glyma01g04810	Glyma01g04810	Glyma01g04810	Gm01:4398540-4400009	14-7-0	14-7-14	NOTEST	0	0.0548864	1.79769e+308	1.79769e+308	0.223676	1	no
Glyma01g04820	Glyma01g04820	Glyma01g04820	Gm01:4406613-4412858	14-7-0	14-7-14	OK	10.0433	7.5083	-0.419678	0.593835	0.552622	0.820612	no
Glyma01g04830	Glyma01g04830	Glyma01g04830	Gm01:4435158-4439690	14-7-0	14-7-14	OK	15.7767	12.8886	-0.291708	0.407369	0.683737	0.886791	no
Glyma01g04860	Glyma01g04860	Glyma01g04860	Gm01:4462980-4471168	14-7-0	14-7-14	OK	7.60704	2.60108	-1.54822	1.87132	0.0613009	0.268061	no
Glyma01g04870	Glyma01g04870	Glyma01g04870	Gm01:4462980-4471168	14-7-0	14-7-14	NOTEST	0	0.137102	1.79769e+308	1.79769e+308	0.425126	1	no
Glyma01g04880	Glyma01g04880	Glyma01g04880	Gm01:4472509-4474524	14-7-0	14-7-14	OK	4.66097	15.4883	1.73248	-2.26048	0.0237917	0.161847	no
Glyma01g04890	Glyma01g04890	Glyma01g04890	Gm01:4508033-4510800	14-7-0	14-7-14	OK	8.2746	21.9808	1.40949	-1.64223	0.100543	0.355811	no
Glyma01g04895	Glyma01g04895	Glyma01g04895	Gm01:4537147-4539699	14-7-0	14-7-14	NOTEST	0	0	0	0	1	1	no
Glyma01g04900	Glyma01g04900	Glyma01g04900	Gm01:4581543-4588129	14-7-0	14-7-14	OK	4.9612	1.16175	-2.09439	2.23243	0.0255867	0.168278	no
Glyma01g04920	Glyma01g04920	Glyma01g04920	Gm01:4591469-4596424	14-7-0	14-7-14	OK	39.8793	6.5677	-2.60218	2.93168	0.00337136	0.0486556	yes
Glyma01g04930	Glyma01g04930	Glyma01g04930	Gm01:4617117-4621351	14-7-0	14-7-14	OK	10.5103	8.73606	-0.266751	0.3609	0.718174	0.902238	no
Glyma01g04940	Glyma01g04940	Glyma01g04940	Gm01:4623827-4626604	14-7-0	14-7-14	NOTEST	0	0	0	0	1	1	no
Glyma01g04950	Glyma01g04950	Glyma01g04950	Gm01:4628266-4630966	14-7-0	14-7-14	NOTEST	0	0	0	0	1	1	no
Glyma01g04970	Glyma01g04970	Glyma01g04970	Gm01:4642856-4646062	14-7-0	14-7-14	NOTEST	0	0	0	0	1	1	no
Glyma01g04980	Glyma01g04980	Glyma01g04980	Gm01:4649145-4655506	14-7-0	14-7-14	OK	14.635	20.0182	0.45189	-0.590283	0.555001	0.821982	no
Glyma01g04991	Glyma01g04991	Glyma01g04991	Gm01:4658655-4660266	14-7-0	14-7-14	OK	1.25651	0.508172	-1.30604	1.28449	0.198972	0.517412	no
Glyma01g05000	Glyma01g05000	Glyma01g05000	Gm01:4661267-4665903	14-7-0	14-7-14	OK	10.2419	4.42431	-1.21096	1.57122	0.116133	0.385925	no
Glyma01g05020	Glyma01g05020	Glyma01g05020	Gm01:4671907-4672948	14-7-0	14-7-14	NOTEST	0	0.03158	1.79769e+308	1.79769e+308	0.223676	1	no
Glyma01g05035	Glyma01g05035	Glyma01g05035	Gm01:4674370-4675308	14-7-0	14-7-14	NOTEST	0	0	0	0	1	1	no
Glyma01g05050	Glyma01g05050	Glyma01g05050	Gm01:4685833-4692108	14-7-0	14-7-14	NOTEST	0	0.0190371	1.79769e+308	1.79769e+308	0.223676	1	no
Glyma01g05060	Glyma01g05060	Glyma01g05060	Gm01:4706315-4710196	14-7-0	14-7-14	NOTEST	0	0	0	0	1	1	no
Glyma01g05070	Glyma01g05070	Glyma01g05070	Gm01:4710246-4716428	14-7-0	14-7-14	NOTEST	0	0	0	0	1	1	no
Glyma01g05080	Glyma01g05080	Glyma01g05080	Gm01:4729092-4732808	14-7-0	14-7-14	OK	6.34629	1.197	-2.40649	2.4409	0.0146505	0.121081	no
Glyma01g05090	Glyma01g05090	Glyma01g05090	Gm01:4733168-4736974	14-7-0	14-7-14	NOTEST	0.366862	0.0984097	-1.89837	1.46211	0.14371	1	no
Glyma01g05100	Glyma01g05100	Glyma01g05100	Gm01:4750064-4755456	14-7-0	14-7-14	OK	1.22451	2.13849	0.804384	-0.95314	0.340519	0.669835	no
Glyma01g05110	Glyma01g05110	Glyma01g05110	Gm01:4767629-4768506	14-7-0	14-7-14	NOTEST	0	0	0	0	1	1	no
Glyma01g05120	Glyma01g05120	Glyma01g05120	Gm01:4767629-4768506	14-7-0	14-7-14	NOTEST	0	0	0	0	1	1	no
Glyma01g05135	Glyma01g05135	Glyma01g05135	Gm01:4772497-4774260	14-7-0	14-7-14	NOTEST	0	0	0	0	1	1	no
Glyma01g05150	Glyma01g05150	Glyma01g05150	Gm01:4805906-4807682	14-7-0	14-7-14	OK	162.457	55.5623	-1.54788	1.76743	0.0771565	0.305849	no
Glyma01g05160	Glyma01g05160	Glyma01g05160	Gm01:4822853-4826845	14-7-0	14-7-14	OK	10.6841	12.4284	0.218181	-0.295244	0.767807	0.923181	no
Glyma01g05170	Glyma01g05170	Glyma01g05170	Gm01:4850795-4854700	14-7-0	14-7-14	OK	2.10374	4.762	1.17861	-1.42221	0.154964	0.4524	no
Glyma01g05180	Glyma01g05180	Glyma01g05180	Gm01:4855329-4863296	14-7-0	14-7-14	NOTEST	0.0731762	0	-1.79769e+308	-1.79769e+308	0.221891	1	no
Glyma01g05190	Glyma01g05190	Glyma01g05190	Gm01:4855329-4863296	14-7-0	14-7-14	NOTEST	0.122004	0.377928	1.63119	-1.22449	0.220769	1	no
Glyma01g05220	Glyma01g05220	Glyma01g05220	Gm01:4891977-4893336	14-7-0	14-7-14	OK	74.4626	16.1046	-2.20904	2.95367	0.00314019	0.0462793	yes
Glyma01g05230	Glyma01g05230	Glyma01g05230	Gm01:4900381-4902743	14-7-0	14-7-14	OK	1.84463	7.58201	2.03925	-2.53623	0.0112054	0.103056	no
Glyma01g05240	Glyma01g05240	Glyma01g05240	Gm01:4928138-4929616	14-7-0	14-7-14	NOTEST	0.335675	0.282558	-0.248521	0.178385	0.858421	1	no
Glyma01g05310	Glyma01g05310	Glyma01g05310	Gm01:4961751-4963489	14-7-0	14-7-14	NOTEST	0.132623	0.0787998	-0.751064	0.431398	0.666179	1	no
Glyma01g05321	Glyma01g05321	Glyma01g05321	Gm01:5005094-5010084	14-7-0	14-7-14	OK	1.94203	2.05055	0.0784444	-0.071572	0.942942	0.983418	no
Glyma01g05330	Glyma01g05330	Glyma01g05330	Gm01:5020413-5021405	14-7-0	14-7-14	NOTEST	0	0	0	0	1	1	no
Glyma01g05340	Glyma01g05340	Glyma01g05340	Gm01:5037886-5042760	14-7-0	14-7-14	OK	7.80011	9.66952	0.309951	-0.408073	0.68322	0.886711	no
Glyma01g05350	Glyma01g05350	Glyma01g05350	Gm01:5083980-5085647	14-7-0	14-7-14	OK	4.39614	7.76205	0.8202	-1.0862	0.277391	0.60802	no
Glyma01g05360	Glyma01g05360	Glyma01g05360	Gm01:5110798-5114049	14-7-0	14-7-14	OK	1.88964	2.4054	0.348162	-0.359839	0.718968	0.902726	no
Glyma01g05370	Glyma01g05370	Glyma01g05370	Gm01:5118887-5122289	14-7-0	14-7-14	OK	0.447692	1.80202	2.00904	-1.77951	0.0751556	0.301166	no
Glyma01g05390	Glyma01g05390	Glyma01g05390	Gm01:5164083-5165652	14-7-0	14-7-14	NOTEST	0	0	0	0	1	1	no
Glyma01g05410	Glyma01g05410	Glyma01g05410	Gm01:5213600-5216013	14-7-0	14-7-14	OK	7.16947	17.8043	1.31228	-1.80753	0.0706797	0.289657	no
Glyma01g05430	Glyma01g05430	Glyma01g05430	Gm01:5252557-5258022	14-7-0	14-7-14	OK	3.93099	5.03146	0.356083	-0.464065	0.642601	0.867139	no
Glyma01g05435	Glyma01g05435	Glyma01g05435	Gm01:5252557-5258022	14-7-0	14-7-14	NOTEST	0	0	0	0	1	1	no
Glyma01g05440	Glyma01g05440	Glyma01g05440	Gm01:5263624-5268235	14-7-0	14-7-14	OK	1.1164	3.28536	1.5572	-1.82564	0.0679042	0.282956	no
Glyma01g05450	Glyma01g05450	Glyma01g05450	Gm01:5286387-5287671	14-7-0	14-7-14	OK	0.10292	0.509857	2.30857	-1.66576	0.0957612	0.345889	no
Glyma01g05470	Glyma01g05470	Glyma01g05470	Gm01:5303846-5307805	14-7-0	14-7-14	OK	1.33342	4.41008	1.72567	-1.89624	0.0579281	0.259487	no
Glyma01g05490	Glyma01g05490	Glyma01g05490	Gm01:5313627-5317389	14-7-0	14-7-14	OK	10.2535	7.7641	-0.40123	0.500319	0.61685	0.854889	no
Glyma01g05500	Glyma01g05500	Glyma01g05500	Gm01:5324074-5325556	14-7-0	14-7-14	OK	1.10915	0.0236636	-5.55064	2.744	0.00606954	0.0708394	no
Glyma01g05521	Glyma01g05521	Glyma01g05521	Gm01:5332060-5334718	14-7-0	14-7-14	NOTEST	0	0	0	0	1	1	no
Glyma01g05540	Glyma01g05540	Glyma01g05540	Gm01:5339676-5347885	14-7-0	14-7-14	NOTEST	0.229386	0.113841	-1.01075	0.712408	0.476212	1	no
Glyma01g05550	Glyma01g05550	Glyma01g05550	Gm01:5348570-5352305	14-7-0	14-7-14	OK	8.20277	11.6737	0.509084	-0.722219	0.47016	0.771103	no
Glyma01g05565	Glyma01g05565	Glyma01g05565	Gm01:5365957-5368432	14-7-0	14-7-14	NOTEST	0.386194	0.209926	-0.879447	0.759764	0.447395	1	no
Glyma01g05580	Glyma01g05580	Glyma01g05580	Gm01:5372439-5377697	14-7-0	14-7-14	OK	1.54692	1.47804	-0.0657102	0.0771852	0.938476	0.981735	no
Glyma01g05680	Glyma01g05680	Glyma01g05680	Gm01:5434961-5437325	14-7-0	14-7-14	NOTEST	0	0	0	0	1	1	no
Glyma01g05710	Glyma01g05710	Glyma01g05710	Gm01:5452126-5455897	14-7-0	14-7-14	OK	3.60191	2.33759	-0.623741	0.842282	0.39963	0.720895	no
Glyma01g05740	Glyma01g05740	Glyma01g05740	Gm01:5471207-5473302	14-7-0	14-7-14	OK	80.7748	18.6426	-2.1153	2.81759	0.00483859	0.0612133	no
Glyma01g05750	Glyma01g05750	Glyma01g05750	Gm01:5490127-5498444	14-7-0	14-7-14	OK	9.12156	5.57561	-0.710151	0.956297	0.338922	0.668623	no
Glyma01g05760	Glyma01g05760	Glyma01g05760	Gm01:5490127-5498444	14-7-0	14-7-14	OK	5.54551	2.05878	-1.42953	0.564988	0.572082	0.831638	no
Glyma01g05765	Glyma01g05765	Glyma01g05765	Gm01:5500755-5503968	14-7-0	14-7-14	OK	0	1.39303	1.79769e+308	1.79769e+308	0.026152	0.169793	no
Glyma01g05770	Glyma01g05770	Glyma01g05770	Gm01:5507145-5510888	14-7-0	14-7-14	OK	1.07014	0.945647	-0.178426	0.164336	0.869466	0.960372	no
Glyma01g05775	Glyma01g05775	Glyma01g05775	Gm01:5515370-5518889	14-7-0	14-7-14	NOTEST	0	0	0	0	1	1	no
Glyma01g05780	Glyma01g05780	Glyma01g05780	Gm01:5532190-5532902	14-7-0	14-7-14	OK	0	0.707009	1.79769e+308	1.79769e+308	0.0558529	0.253865	no
Glyma01g05800	Glyma01g05800	Glyma01g05800	Gm01:5536188-5540803	14-7-0	14-7-14	OK	15.063	16.179	0.103122	-0.14645	0.883566	0.964078	no
Glyma01g05805	Glyma01g05805	Glyma01g05805	Gm01:5546122-5546986	14-7-0	14-7-14	NOTEST	0	0.128979	1.79769e+308	1.79769e+308	0.0940746	1	no
Glyma01g05810	Glyma01g05810	Glyma01g05810	Gm01:5571757-5573352	14-7-0	14-7-14	OK	9.44531	5.22805	-0.853326	1.17031	0.241878	0.569488	no
Glyma01g05820	Glyma01g05820	Glyma01g05820	Gm01:5576197-5588666	14-7-0	14-7-14	OK	5.12176	2.44904	-1.06442	0.964503	0.334794	0.665	no
Glyma01g05830	Glyma01g05830	Glyma01g05830	Gm01:5591933-5594156	14-7-0	14-7-14	OK	0.72638	1.30434	0.84452	-0.888645	0.374194	0.699472	no
Glyma01g05840	Glyma01g05840	Glyma01g05840	Gm01:5603554-5605881	14-7-0	14-7-14	NOTEST	0	0	0	0	1	1	no
Glyma01g05850	Glyma01g05850	Glyma01g05850	Gm01:5614232-5617834	14-7-0	14-7-14	NOTEST	0	0.123946	1.79769e+308	1.79769e+308	0.0777245	1	no
Glyma01g05860	Glyma01g05860	Glyma01g05860	Gm01:5646198-5652308	14-7-0	14-7-14	OK	2.6795	2.70069	0.0113675	-0.0144688	0.988456	0.996562	no
Glyma01g05871	Glyma01g05871	Glyma01g05871	Gm01:5655285-5657085	14-7-0	14-7-14	OK	0.661765	0.561385	-0.237328	0.204635	0.837857	0.949297	no
Glyma01g05880	Glyma01g05880	Glyma01g05880	Gm01:5667408-5668624	14-7-0	14-7-14	OK	3.07404	2.27359	-0.435162	0.489311	0.624622	0.85901	no
Glyma01g05890	Glyma01g05890	Glyma01g05890	Gm01:5668699-5671152	14-7-0	14-7-14	NOTEST	0.272427	0.304182	0.159062	-0.139374	0.889154	1	no
Glyma01g05920	Glyma01g05920	Glyma01g05920	Gm01:5704147-5706648	14-7-0	14-7-14	OK	2.59943	3.19792	0.298939	-0.384668	0.700483	0.894092	no
Glyma01g05933	Glyma01g05933	Glyma01g05933	Gm01:5723315-5724248	14-7-0	14-7-14	NOTEST	0	0	0	0	1	1	no
Glyma01g05946	Glyma01g05946	Glyma01g05946	Gm01:5726524-5728292	14-7-0	14-7-14	NOTEST	0	0	0	0	1	1	no
Glyma01g05960	Glyma01g05960	Glyma01g05960	Gm01:5750258-5754433	14-7-0	14-7-14	OK	1.25768	0.443505	-1.50375	1.5098	0.131093	0.412503	no
Glyma01g05970	Glyma01g05970	Glyma01g05970	Gm01:5789076-5789854	14-7-0	14-7-14	NOTEST	0	0.194422	1.79769e+308	1.79769e+308	0.0940746	1	no
Glyma01g05980	Glyma01g05980	Glyma01g05980	Gm01:5800710-5803197	14-7-0	14-7-14	NOTEST	0.0505124	0.220781	2.1279	-1.52939	0.126167	1	no
Glyma01g05991	Glyma01g05991	Glyma01g05991	Gm01:5815181-5815856	14-7-0	14-7-14	OK	1.84423	0.391111	-2.23737	1.85931	0.0629834	0.272273	no
Glyma01g06001	Glyma01g06001	Glyma01g06001	Gm01:5820213-5821125	14-7-0	14-7-14	NOTEST	0.165709	0.0760822	-1.12302	0.5108	0.609491	1	no
Glyma01g06010	Glyma01g06010	Glyma01g06010	Gm01:5849676-5850474	14-7-0	14-7-14	OK	2.44976	4.01469	0.712648	-0.744287	0.456703	0.762406	no
Glyma01g06030	Glyma01g06030	Glyma01g06030	Gm01:5873668-5876124	14-7-0	14-7-14	OK	16.9843	153.615	3.17704	-3.32262	0.000891765	0.0196798	yes
Glyma01g06060	Glyma01g06060	Glyma01g06060	Gm01:5950520-5957354	14-7-0	14-7-14	OK	3.43234	6.1802	0.848462	-1.08875	0.276264	0.607069	no
Glyma01g06080	Glyma01g06080	Glyma01g06080	Gm01:5980779-5983675	14-7-0	14-7-14	OK	8.09946	7.39523	-0.131229	0.177565	0.859064	0.957191	no
Glyma01g06091	Glyma01g06091	Glyma01g06091	Gm01:6001894-6002536	14-7-0	14-7-14	NOTEST	0	0	0	0	1	1	no
Glyma01g06101	Glyma01g06101	Glyma01g06101	Gm01:6012889-6016913	14-7-0	14-7-14	NOTEST	0	0	0	0	1	1	no
Glyma01g06110	Glyma01g06110	Glyma01g06110	Gm01:6012889-6016913	14-7-0	14-7-14	OK	118.42	49.2042	-1.26705	1.43712	0.150684	0.445354	no
Glyma01g06121	Glyma01g06121	Glyma01g06121	Gm01:6021842-6025894	14-7-0	14-7-14	NOTEST	0	0	0	0	1	1	no
Glyma01g06131	Glyma01g06131	Glyma01g06131	Gm01:6027072-6027783	14-7-0	14-7-14	NOTEST	0	0	0	0	1	1	no
Glyma01g06140	Glyma01g06140	Glyma01g06140	Gm01:6036836-6042396	14-7-0	14-7-14	NOTEST	0	0	0	0	1	1	no
Glyma01g06150	Glyma01g06150	Glyma01g06150	Gm01:6047154-6049059	14-7-0	14-7-14	NOTEST	0.36137	0.0535469	-2.7546	1.74713	0.0806146	1	no
Glyma01g06170	Glyma01g06170	Glyma01g06170	Gm01:6071138-6081550	14-7-0	14-7-14	OK	28.0453	13.6948	-1.03413	1.19269	0.23299	0.557876	no
Glyma01g06181	Glyma01g06181	Glyma01g06181	Gm01:6100672-6102037	14-7-0	14-7-14	NOTEST	0	0	0	0	1	1	no
Glyma01g06192	Glyma01g06192	Glyma01g06192	Gm01:6238679-6240315	14-7-0	14-7-14	NOTEST	0	0	0	0	1	1	no
Glyma01g06203	Glyma01g06203	Glyma01g06203	Gm01:6266528-6267750	14-7-0	14-7-14	NOTEST	0	0	0	0	1	1	no
Glyma01g06214	Glyma01g06214	Glyma01g06214	Gm01:6283658-6285214	14-7-0	14-7-14	NOTEST	0	0	0	0	1	1	no
Glyma01g06226	Glyma01g06226	Glyma01g06226	Gm01:6285502-6288118	14-7-0	14-7-14	NOTEST	0	0	0	0	1	1	no
Glyma01g06238	Glyma01g06238	Glyma01g06238	Gm01:6291503-6292208	14-7-0	14-7-14	NOTEST	0	0	0	0	1	1	no
Glyma01g06250	Glyma01g06250	Glyma01g06250	Gm01:6303783-6304910	14-7-0	14-7-14	NOTEST	0	0	0	0	1	1	no
Glyma01g06255	Glyma01g06255	Glyma01g06255	Gm01:6305430-6306253	14-7-0	14-7-14	NOTEST	0	0	0	0	1	1	no
Glyma01g06260	Glyma01g06260	Glyma01g06260	Gm01:6314251-6321822	14-7-0	14-7-14	OK	11.3117	6.26399	-0.852665	1.10907	0.267398	0.598175	no
Glyma01g06265	Glyma01g06265	Glyma01g06265	Gm01:6323487-6330290	14-7-0	14-7-14	OK	0.795305	0.221254	-1.8458	1.97546	0.048216	0.234154	no
Glyma01g06270	Glyma01g06270	Glyma01g06270	Gm01:6353278-6357024	14-7-0	14-7-14	OK	8.67417	7.19762	-0.269206	0.373439	0.708822	0.897986	no
Glyma01g06281	Glyma01g06281	Glyma01g06281	Gm01:6358175-6364839	14-7-0	14-7-14	OK	0.939021	1.00407	0.0966352	-0.103147	0.917846	0.974809	no
Glyma01g06290	Glyma01g06290	Glyma01g06290	Gm01:6415709-6426123	14-7-0	14-7-14	OK	5.07119	2.60554	-0.960743	1.2421	0.214199	0.535997	no
Glyma01g06300	Glyma01g06300	Glyma01g06300	Gm01:6427320-6430789	14-7-0	14-7-14	OK	3.8912	8.18859	1.0734	-1.42775	0.153365	0.449901	no
Glyma01g06320	Glyma01g06320	Glyma01g06320	Gm01:6438347-6443201	14-7-0	14-7-14	OK	3.50529	6.14863	0.810731	-1.00465	0.315064	0.646781	no
Glyma01g06330	Glyma01g06330	Glyma01g06330	Gm01:6463489-6464681	14-7-0	14-7-14	NOTEST	0	0	0	0	1	1	no
Glyma01g06350	Glyma01g06350	Glyma01g06350	Gm01:6519357-6525574	14-7-0	14-7-14	NOTEST	0	0.0540989	1.79769e+308	1.79769e+308	0.223676	1	no
Glyma01g06370	Glyma01g06370	Glyma01g06370	Gm01:6606759-6612290	14-7-0	14-7-14	OK	0.733056	0.692069	-0.0830075	0.0919065	0.926772	0.977547	no
Glyma01g06380	Glyma01g06380	Glyma01g06380	Gm01:6619142-6624870	14-7-0	14-7-14	OK	7.00237	3.27739	-1.0953	1.31952	0.186994	0.501357	no
Glyma01g06403	Glyma01g06403	Glyma01g06403	Gm01:6653831-6654651	14-7-0	14-7-14	NOTEST	0	0	0	0	1	1	no
Glyma01g06426	Glyma01g06426	Glyma01g06426	Gm01:6655568-6658132	14-7-0	14-7-14	NOTEST	0	0	0	0	1	1	no
Glyma01g06450	Glyma01g06450	Glyma01g06450	Gm01:6697229-6704493	14-7-0	14-7-14	OK	4.04962	5.6822	0.488664	-0.693144	0.488219	0.783249	no
Glyma01g06465	Glyma01g06465	Glyma01g06465	Gm01:6734268-6734951	14-7-0	14-7-14	NOTEST	0	0	0	0	1	1	no
Glyma01g06480	Glyma01g06480	Glyma01g06480	Gm01:6737090-6743586	14-7-0	14-7-14	OK	1.26148	0.0887857	-3.82864	2.47164	0.0134495	0.115232	no
Glyma01g06530	Glyma01g06530	Glyma01g06530	Gm01:6773745-6780125	14-7-0	14-7-14	NOTEST	0.0413618	0	-1.79769e+308	-1.79769e+308	0.157153	1	no
Glyma01g06540	Glyma01g06540	Glyma01g06540	Gm01:6785070-6791180	14-7-0	14-7-14	OK	6.06875	2.75688	-1.13836	1.24459	0.213281	0.534923	no
Glyma01g06550	Glyma01g06550	Glyma01g06550	Gm01:6797682-6802949	14-7-0	14-7-14	OK	0.984492	4.45124	2.17676	-2.58554	0.00972279	0.0946887	no
Glyma01g06575	Glyma01g06575	Glyma01g06575	Gm01:6821946-6822491	14-7-0	14-7-14	NOTEST	0	0	0	0	1	1	no
Glyma01g06600	Glyma01g06600	Glyma01g06600	Gm01:6945949-6947844	14-7-0	14-7-14	OK	10.6335	8.01069	-0.408614	0.512281	0.608454	0.850354	no
Glyma01g06610	Glyma01g06610	Glyma01g06610	Gm01:6949449-6956726	14-7-0	14-7-14	NOTEST	0.071271	0.0717869	0.0104058	-0.00555877	0.995565	1	no
Glyma01g06620	Glyma01g06620	Glyma01g06620	Gm01:6963802-6967415	14-7-0	14-7-14	OK	2.19392	4.90711	1.16136	-1.34972	0.177106	0.486899	no
Glyma01g06630	Glyma01g06630	Glyma01g06630	Gm01:6987088-6990503	14-7-0	14-7-14	OK	8.15422	8.89044	0.124707	-0.156435	0.87569	0.96253	no
Glyma01g06640	Glyma01g06640	Glyma01g06640	Gm01:6992005-6995011	14-7-0	14-7-14	OK	0.167037	3.65683	4.45236	-3.9618	7.43854e-05	0.00333694	yes
Glyma01g06660	Glyma01g06660	Glyma01g06660	Gm01:7007301-7012903	14-7-0	14-7-14	NOTEST	0.0788395	0	-1.79769e+308	-1.79769e+308	0.0993928	1	no
Glyma01g06671	Glyma01g06671	Glyma01g06671	Gm01:7051709-7055503	14-7-0	14-7-14	NOTEST	0	0	0	0	1	1	no
Glyma01g06681	Glyma01g06681	Glyma01g06681	Gm01:7074917-7078717	14-7-0	14-7-14	OK	3.3715	6.48405	0.943505	-1.3335	0.182369	0.494918	no
Glyma01g06690	Glyma01g06690	Glyma01g06690	Gm01:7089055-7091542	14-7-0	14-7-14	OK	0.282496	0.704838	1.31906	-1.25037	0.211163	0.532335	no
Glyma01g06700	Glyma01g06700	Glyma01g06700	Gm01:7093539-7097353	14-7-0	14-7-14	OK	3.17386	1.44987	-1.13031	1.04427	0.296359	0.628165	no
Glyma01g06720	Glyma01g06720	Glyma01g06720	Gm01:7128540-7130153	14-7-0	14-7-14	NOTEST	0	0.0494127	1.79769e+308	1.79769e+308	0.141284	1	no
Glyma01g06730	Glyma01g06730	Glyma01g06730	Gm01:7131214-7140582	14-7-0	14-7-14	OK	1.01838	2.44245	1.26206	-1.48919	0.136438	0.42212	no
Glyma01g06740	Glyma01g06740	Glyma01g06740	Gm01:7146652-7148230	14-7-0	14-7-14	OK	74.0826	29.544	-1.32627	1.47807	0.139389	0.427341	no
Glyma01g06750	Glyma01g06750	Glyma01g06750	Gm01:7149379-7152784	14-7-0	14-7-14	OK	6.03379	5.57235	-0.11478	0.14962	0.881065	0.9635	no
Glyma01g06762	Glyma01g06762	Glyma01g06762	Gm01:7159103-7161168	14-7-0	14-7-14	NOTEST	0	0	0	0	1	1	no
Glyma01g06774	Glyma01g06774	Glyma01g06774	Gm01:7193728-7195967	14-7-0	14-7-14	NOTEST	0.0572671	0	-1.79769e+308	-1.79769e+308	0.161342	1	no
Glyma01g06787	Glyma01g06787	Glyma01g06787	Gm01:7202426-7203771	14-7-0	14-7-14	OK	1.81424	1.11183	-0.706428	0.622503	0.533611	0.8098	no
Glyma01g06800	Glyma01g06800	Glyma01g06800	Gm01:7209667-7216248	14-7-0	14-7-14	OK	5.22625	3.94818	-0.404589	0.4698	0.638498	0.864629	no
Glyma01g06810	Glyma01g06810	Glyma01g06810	Gm01:7209667-7216248	14-7-0	14-7-14	OK	0.222894	1.44863	2.70026	-0.75543	0.449991	0.757699	no
Glyma01g06820	Glyma01g06820	Glyma01g06820	Gm01:7217423-7219310	14-7-0	14-7-14	OK	0.665863	1.89932	1.51219	-1.40369	0.16041	0.460957	no
Glyma01g06830	Glyma01g06830	Glyma01g06830	Gm01:7247591-7249157	14-7-0	14-7-14	NOTEST	0	0	0	0	1	1	no
Glyma01g06840	Glyma01g06840	Glyma01g06840	Gm01:7250230-7254936	14-7-0	14-7-14	OK	8.57655	10.0867	0.233987	-0.330954	0.740679	0.911979	no
Glyma01g06850	Glyma01g06850	Glyma01g06850	Gm01:7272747-7275098	14-7-0	14-7-14	OK	1.05655	3.98271	1.91439	-2.11908	0.0340838	0.194351	no
Glyma01g06860	Glyma01g06860	Glyma01g06860	Gm01:7277818-7281645	14-7-0	14-7-14	NOTEST	0	0	0	0	1	1	no
Glyma01g06870	Glyma01g06870	Glyma01g06870	Gm01:7343212-7351310	14-7-0	14-7-14	OK	1.16883	3.41027	1.54482	-1.37192	0.170088	0.47594	no
Glyma01g06880	Glyma01g06880	Glyma01g06880	Gm01:7358248-7360930	14-7-0	14-7-14	NOTEST	0.0713693	0.319712	2.1634	-1.75835	0.0786887	1	no
Glyma01g06902	Glyma01g06902	Glyma01g06902	Gm01:7382653-7384804	14-7-0	14-7-14	NOTEST	0	0	0	0	1	1	no
Glyma01g06924	Glyma01g06924	Glyma01g06924	Gm01:7422342-7427765	14-7-0	14-7-14	NOTEST	0	0	0	0	1	1	no
Glyma01g06947	Glyma01g06947	Glyma01g06947	Gm01:7435646-7436810	14-7-0	14-7-14	NOTEST	0	0	0	0	1	1	no
Glyma01g06970	Glyma01g06970	Glyma01g06970	Gm01:7479447-7482232	14-7-0	14-7-14	OK	9.33083	15.9603	0.774414	-1.07854	0.280791	0.611488	no
Glyma01g06980	Glyma01g06980	Glyma01g06980	Gm01:7497548-7505696	14-7-0	14-7-14	NOTEST	0	0	0	0	1	1	no
Glyma01g06995	Glyma01g06995	Glyma01g06995	Gm01:7509309-7511663	14-7-0	14-7-14	NOTEST	0	0	0	0	1	1	no
Glyma01g07010	Glyma01g07010	Glyma01g07010	Gm01:7546180-7550537	14-7-0	14-7-14	OK	12.0143	7.33978	-0.710944	0.950791	0.34171	0.670725	no
Glyma01g07020	Glyma01g07020	Glyma01g07020	Gm01:7562682-7571075	14-7-0	14-7-14	OK	0.518675	3.61718	2.80196	-2.13348	0.0328852	0.190992	no
Glyma01g07040	Glyma01g07040	Glyma01g07040	Gm01:7573115-7574981	14-7-0	14-7-14	OK	0.866715	1.29812	0.582797	-0.614749	0.53872	0.81168	no
Glyma01g07046	Glyma01g07046	Glyma01g07046	Gm01:7576240-7581159	14-7-0	14-7-14	NOTEST	0.276812	0	-1.79769e+308	-1.79769e+308	0.0531553	1	no
Glyma01g07053	Glyma01g07053	Glyma01g07053	Gm01:7587960-7591978	14-7-0	14-7-14	NOTEST	0	0	0	0	1	1	no
Glyma01g07060	Glyma01g07060	Glyma01g07060	Gm01:7606030-7608993	14-7-0	14-7-14	NOTEST	0	0	0	0	1	1	no
Glyma01g07070	Glyma01g07070	Glyma01g07070	Gm01:7614281-7618124	14-7-0	14-7-14	OK	4.2672	6.35582	0.574789	-0.767465	0.442805	0.752888	no
Glyma01g07080	Glyma01g07080	Glyma01g07080	Gm01:7621975-7627809	14-7-0	14-7-14	OK	6.06014	1.44545	-2.06783	0.710728	0.477253	0.775825	no
Glyma01g07091	Glyma01g07091	Glyma01g07091	Gm01:7621975-7627809	14-7-0	14-7-14	OK	1.37319	4.06533	1.56584	-1.56817	0.116842	0.386906	no
Glyma01g07100	Glyma01g07100	Glyma01g07100	Gm01:7645596-7648115	14-7-0	14-7-14	OK	36.2089	36.4818	0.0108304	-0.0145961	0.988354	0.996559	no
Glyma01g07110	Glyma01g07110	Glyma01g07110	Gm01:7657795-7664672	14-7-0	14-7-14	NOTEST	0	0.437622	1.79769e+308	1.79769e+308	0.035846	1	no
Glyma01g07120	Glyma01g07120	Glyma01g07120	Gm01:7694027-7700472	14-7-0	14-7-14	OK	22.0801	81.7145	1.88784	-1.69935	0.0892526	0.332441	no
Glyma01g07130	Glyma01g07130	Glyma01g07130	Gm01:7726769-7727260	14-7-0	14-7-14	OK	1028.7	49.4573	-4.3785	5.04328	4.57611e-07	6.65122e-05	yes
Glyma01g07140	Glyma01g07140	Glyma01g07140	Gm01:7745867-7748795	14-7-0	14-7-14	OK	0.860868	1.43809	0.740286	-0.745644	0.455883	0.76166	no
Glyma01g07150	Glyma01g07150	Glyma01g07150	Gm01:7755456-7755710	14-7-0	14-7-14	NOTEST	0	0	0	0	1	1	no
Glyma01g07155	Glyma01g07155	Glyma01g07155	Gm01:7761366-7761600	14-7-0	14-7-14	NOTEST	0	0	0	0	1	1	no
Glyma01g07160	Glyma01g07160	Glyma01g07160	Gm01:7762334-7764158	14-7-0	14-7-14	OK	0.475864	1.7446	1.87428	-1.83117	0.0670757	0.28138	no
Glyma01g07175	Glyma01g07175	Glyma01g07175	Gm01:7777226-7781079	14-7-0	14-7-14	OK	5.66516	3.18051	-0.832861	1.04698	0.295109	0.62675	no
Glyma01g07190	Glyma01g07190	Glyma01g07190	Gm01:7781287-7786746	14-7-0	14-7-14	OK	1.76889	3.58474	1.01902	-0.994363	0.320046	0.651236	no
Glyma01g07212	Glyma01g07212	Glyma01g07212	Gm01:7794008-7794422	14-7-0	14-7-14	NOTEST	0	0	0	0	1	1	no
Glyma01g07234	Glyma01g07234	Glyma01g07234	Gm01:7804303-7805165	14-7-0	14-7-14	NOTEST	0.204305	0.041197	-2.31011	1.07657	0.281675	1	no
Glyma01g07256	Glyma01g07256	Glyma01g07256	Gm01:7805183-7807029	14-7-0	14-7-14	NOTEST	0	0.0296952	1.79769e+308	1.79769e+308	0.223676	1	no
Glyma01g07278	Glyma01g07278	Glyma01g07278	Gm01:7894471-7899056	14-7-0	14-7-14	NOTEST	0	0	0	0	1	1	no
Glyma01g07300	Glyma01g07300	Glyma01g07300	Gm01:7959018-7960497	14-7-0	14-7-14	OK	0.355831	1.23529	1.79558	-1.62359	0.104463	0.36373	no
Glyma01g07310	Glyma01g07310	Glyma01g07310	Gm01:7961184-7963298	14-7-0	14-7-14	OK	6.73203	1.34441	-2.32407	2.34466	0.0190442	0.142063	no
Glyma01g07320	Glyma01g07320	Glyma01g07320	Gm01:7976530-7977692	14-7-0	14-7-14	NOTEST	0	0	0	0	1	1	no
Glyma01g07343	Glyma01g07343	Glyma01g07343	Gm01:8062113-8062653	14-7-0	14-7-14	NOTEST	0	0	0	0	1	1	no
Glyma01g07366	Glyma01g07366	Glyma01g07366	Gm01:8067733-8073984	14-7-0	14-7-14	NOTEST	0	0	0	0	1	1	no
Glyma01g07390	Glyma01g07390	Glyma01g07390	Gm01:8081945-8087022	14-7-0	14-7-14	OK	1.1356	0.556656	-1.0286	0.983248	0.325485	0.656394	no
Glyma01g07416	Glyma01g07416	Glyma01g07416	Gm01:8182612-8184549	14-7-0	14-7-14	NOTEST	0	0	0	0	1	1	no
Glyma01g07443	Glyma01g07443	Glyma01g07443	Gm01:8199812-8203907	14-7-0	14-7-14	NOTEST	0	0	0	0	1	1	no
Glyma01g07470	Glyma01g07470	Glyma01g07470	Gm01:8280629-8281870	14-7-0	14-7-14	NOTEST	0	0	0	0	1	1	no
Glyma01g07500	Glyma01g07500	Glyma01g07500	Gm01:8288472-8290635	14-7-0	14-7-14	NOTEST	0	0	0	0	1	1	no
Glyma01g07530	Glyma01g07530	Glyma01g07530	Gm01:8321044-8331324	14-7-0	14-7-14	OK	1.77449	3.37707	0.92837	-1.21774	0.223323	0.547768	no
Glyma01g07542	Glyma01g07542	Glyma01g07542	Gm01:8338977-8341376	14-7-0	14-7-14	OK	0.639182	0.333926	-0.936699	0.792432	0.428109	0.741986	no
Glyma01g07554	Glyma01g07554	Glyma01g07554	Gm01:8344184-8347552	14-7-0	14-7-14	OK	35.7777	25.9749	-0.46194	0.65195	0.514434	0.799555	no
Glyma01g07567	Glyma01g07567	Glyma01g07567	Gm01:8348953-8350397	14-7-0	14-7-14	OK	0.0816738	5.11079	5.96753	-4.80792	1.52511e-06	0.000165315	yes
Glyma01g07580	Glyma01g07580	Glyma01g07580	Gm01:8387061-8389448	14-7-0	14-7-14	OK	4.58321	8.91696	0.960193	-1.35151	0.176533	0.486173	no
Glyma01g07601	Glyma01g07601	Glyma01g07601	Gm01:8400738-8401869	14-7-0	14-7-14	NOTEST	0	0	0	0	1	1	no
Glyma01g07621	Glyma01g07621	Glyma01g07621	Gm01:8410014-8411417	14-7-0	14-7-14	NOTEST	0	0	0	0	1	1	no
Glyma01g07641	Glyma01g07641	Glyma01g07641	Gm01:8426105-8455213	14-7-0	14-7-14	OK	5.32923	4.68994	-0.184358	0.260159	0.794741	0.933698	no
Glyma01g07661	Glyma01g07661	Glyma01g07661	Gm01:8426105-8455213	14-7-0	14-7-14	NOTEST	0.101695	0.203213	0.998749	-0.170871	0.864325	1	no
Glyma01g07680	Glyma01g07680	Glyma01g07680	Gm01:8471437-8478753	14-7-0	14-7-14	OK	4.67951	4.75556	0.0232583	-0.0326763	0.973933	0.992543	no
Glyma01g07690	Glyma01g07690	Glyma01g07690	Gm01:8483094-8485802	14-7-0	14-7-14	OK	1.66857	0.82204	-1.02133	1.1807	0.237723	0.564129	no
Glyma01g07716	Glyma01g07716	Glyma01g07716	Gm01:8488370-8491061	14-7-0	14-7-14	NOTEST	0	0	0	0	1	1	no
Glyma01g07743	Glyma01g07743	Glyma01g07743	Gm01:8512443-8513748	14-7-0	14-7-14	NOTEST	0	0	0	0	1	1	no
Glyma01g07770	Glyma01g07770	Glyma01g07770	Gm01:8571080-8576705	14-7-0	14-7-14	OK	18.7209	8.41783	-1.15313	1.61324	0.106692	0.368632	no
Glyma01g07780	Glyma01g07780	Glyma01g07780	Gm01:8580150-8584320	14-7-0	14-7-14	OK	4.96978	3.82048	-0.379428	0.525274	0.599393	0.846174	no
Glyma01g07791	Glyma01g07791	Glyma01g07791	Gm01:8585310-8588909	14-7-0	14-7-14	OK	1.11344	0.838552	-0.409056	0.347463	0.728244	0.906368	no
Glyma01g07800	Glyma01g07800	Glyma01g07800	Gm01:8594093-8595436	14-7-0	14-7-14	OK	12.5397	6.38429	-0.973899	1.34309	0.179243	0.490052	no
Glyma01g07860	Glyma01g07860	Glyma01g07860	Gm01:8667868-8673493	14-7-0	14-7-14	OK	0.041005	4.39939	6.74536	-5.53895	3.04284e-08	7.77422e-06	yes
Glyma01g07876	Glyma01g07876	Glyma01g07876	Gm01:8788410-8789743	14-7-0	14-7-14	NOTEST	0	0.0221878	1.79769e+308	1.79769e+308	0.295535	1	no
Glyma01g07893	Glyma01g07893	Glyma01g07893	Gm01:8792135-8793707	14-7-0	14-7-14	NOTEST	0	0	0	0	1	1	no
Glyma01g07910	Glyma01g07910	Glyma01g07910	Gm01:8838722-8843110	14-7-0	14-7-14	NOTEST	0	0	0	0	1	1	no
Glyma01g07930	Glyma01g07930	Glyma01g07930	Gm01:8874759-8878203	14-7-0	14-7-14	OK	4.684	22.301	2.2513	-3.02903	0.00245337	0.0391612	yes
Glyma01g07940	Glyma01g07940	Glyma01g07940	Gm01:8910470-8913789	14-7-0	14-7-14	OK	0.539166	6.49258	3.58999	-3.9605	7.47944e-05	0.00335068	yes
Glyma01g07970	Glyma01g07970	Glyma01g07970	Gm01:8936938-8942561	14-7-0	14-7-14	NOTEST	0	0	0	0	1	1	no
Glyma01g07985	Glyma01g07985	Glyma01g07985	Gm01:8949064-8950284	14-7-0	14-7-14	NOTEST	0	0	0	0	1	1	no
Glyma01g08001	Glyma01g08001	Glyma01g08001	Gm01:8978273-8979785	14-7-0	14-7-14	NOTEST	0	0	0	0	1	1	no
Glyma01g08015	Glyma01g08015	Glyma01g08015	Gm01:8998365-8999926	14-7-0	14-7-14	NOTEST	0	0	0	0	1	1	no
Glyma01g08030	Glyma01g08030	Glyma01g08030	Gm01:9017676-9019966	14-7-0	14-7-14	NOTEST	0	0	0	0	1	1	no
Glyma01g08043	Glyma01g08043	Glyma01g08043	Gm01:9021976-9042121	14-7-0	14-7-14	OK	0.946316	1.47959	0.644802	-0.839185	0.401366	0.722392	no
Glyma01g08056	Glyma01g08056	Glyma01g08056	Gm01:9051046-9057050	14-7-0	14-7-14	OK	3.46465	3.24687	-0.0936613	0.114233	0.909053	0.972245	no
Glyma01g08070	Glyma01g08070	Glyma01g08070	Gm01:9109611-9110650	14-7-0	14-7-14	NOTEST	0	0	0	0	1	1	no
Glyma01g08080	Glyma01g08080	Glyma01g08080	Gm01:9174134-9176210	14-7-0	14-7-14	OK	0.682754	0.544791	-0.325662	0.311567	0.755369	0.917707	no
Glyma01g08096	Glyma01g08096	Glyma01g08096	Gm01:9198539-9199466	14-7-0	14-7-14	NOTEST	0	0	0	0	1	1	no
Glyma01g08113	Glyma01g08113	Glyma01g08113	Gm01:9252869-9254570	14-7-0	14-7-14	NOTEST	0	0	0	0	1	1	no
Glyma01g08130	Glyma01g08130	Glyma01g08130	Gm01:9331637-9344994	14-7-0	14-7-14	NOTEST	0	0.0243388	1.79769e+308	1.79769e+308	0.223676	1	no
Glyma01g08150	Glyma01g08150	Glyma01g08150	Gm01:9446809-9451393	14-7-0	14-7-14	OK	0.0665669	0.880183	3.72493	-2.79437	0.00520003	0.0641481	no
Glyma01g08191	Glyma01g08191	Glyma01g08191	Gm01:9525972-9529696	14-7-0	14-7-14	NOTEST	0	0	0	0	1	1	no
Glyma01g08230	Glyma01g08230	Glyma01g08230	Gm01:9575252-9581967	14-7-0	14-7-14	OK	4.94818	6.70325	0.437965	-0.619473	0.535605	0.810718	no
Glyma01g08250	Glyma01g08250	Glyma01g08250	Gm01:9636460-9637409	14-7-0	14-7-14	NOTEST	0	0	0	0	1	1	no
Glyma01g08260	Glyma01g08260	Glyma01g08260	Gm01:9642089-9646537	14-7-0	14-7-14	OK	0.571595	2.77753	2.28074	-1.97351	0.0484376	0.234744	no
Glyma01g08400	Glyma01g08400	Glyma01g08400	Gm01:9844796-9845510	14-7-0	14-7-14	NOTEST	0	0	0	0	1	1	no
Glyma01g08540	Glyma01g08540	Glyma01g08540	Gm01:9914169-9919593	14-7-0	14-7-14	OK	3.5896	5.56134	0.631611	-0.791564	0.428615	0.742662	no
Glyma01g08560	Glyma01g08560	Glyma01g08560	Gm01:9947412-9949603	14-7-0	14-7-14	NOTEST	0	0.0891589	1.79769e+308	1.79769e+308	0.141284	1	no
Glyma01g08580	Glyma01g08580	Glyma01g08580	Gm01:9980287-9986041	14-7-0	14-7-14	OK	9.30619	12.8817	0.469062	-0.664903	0.506113	0.793224	no
Glyma01g08586	Glyma01g08586	Glyma01g08586	Gm01:10000985-10002625	14-7-0	14-7-14	NOTEST	0	0	0	0	1	1	no
Glyma01g08593	Glyma01g08593	Glyma01g08593	Gm01:10003770-10020103	14-7-0	14-7-14	NOTEST	0	0	0	0	1	1	no
Glyma01g08600	Glyma01g08600	Glyma01g08600	Gm01:10022026-10027778	14-7-0	14-7-14	OK	12.1518	11.6161	-0.0650391	0.0822565	0.934443	0.980151	no
Glyma01g08610	Glyma01g08610	Glyma01g08610	Gm01:10032095-10036624	14-7-0	14-7-14	NOTEST	0	0	0	0	1	1	no
Glyma01g08621	Glyma01g08621	Glyma01g08621	Gm01:10051789-10059800	14-7-0	14-7-14	NOTEST	0	0	0	0	1	1	no
Glyma01g08631	Glyma01g08631	Glyma01g08631	Gm01:10051789-10059800	14-7-0	14-7-14	NOTEST	0	0	0	0	1	1	no
Glyma01g08640	Glyma01g08640	Glyma01g08640	Gm01:10086673-10091927	14-7-0	14-7-14	NOTEST	0	0.232525	1.79769e+308	1.79769e+308	0.0373349	1	no
Glyma01g08650	Glyma01g08650	Glyma01g08650	Gm01:10086673-10091927	14-7-0	14-7-14	NOTEST	0	0	0	0	1	1	no
Glyma01g08690	Glyma01g08690	Glyma01g08690	Gm01:10142572-10144504	14-7-0	14-7-14	NOTEST	0	0	0	0	1	1	no
Glyma01g08730	Glyma01g08730	Glyma01g08730	Gm01:10288660-10290556	14-7-0	14-7-14	NOTEST	0	0	0	0	1	1	no
Glyma01g08745	Glyma01g08745	Glyma01g08745	Gm01:10293654-10294541	14-7-0	14-7-14	NOTEST	0	0	0	0	1	1	no
Glyma01g08760	Glyma01g08760	Glyma01g08760	Gm01:10355582-10357514	14-7-0	14-7-14	NOTEST	0	0	0	0	1	1	no
Glyma01g08870	Glyma01g08870	Glyma01g08870	Gm01:10370136-10371995	14-7-0	14-7-14	NOTEST	0	0	0	0	1	1	no
Glyma01g08980	Glyma01g08980	Glyma01g08980	Gm01:10504878-10510246	14-7-0	14-7-14	NOTEST	0	0	0	0	1	1	no
Glyma01g09000	Glyma01g09000	Glyma01g09000	Gm01:10570987-10572412	14-7-0	14-7-14	NOTEST	0	0	0	0	1	1	no
Glyma01g09010	Glyma01g09010	Glyma01g09010	Gm01:10577946-10583595	14-7-0	14-7-14	OK	7.32995	9.07862	0.30867	-0.34706	0.728546	0.906368	no
Glyma01g09040	Glyma01g09040	Glyma01g09040	Gm01:10601638-10602621	14-7-0	14-7-14	NOTEST	0	0	0	0	1	1	no
Glyma01g09066	Glyma01g09066	Glyma01g09066	Gm01:10604268-10604624	14-7-0	14-7-14	NOTEST	0	0	0	0	1	1	no
Glyma01g09093	Glyma01g09093	Glyma01g09093	Gm01:10716118-10717174	14-7-0	14-7-14	NOTEST	0	0	0	0	1	1	no
Glyma01g09120	Glyma01g09120	Glyma01g09120	Gm01:10765526-10768563	14-7-0	14-7-14	OK	7.38503	8.37029	0.180673	-0.254533	0.799084	0.935169	no
Glyma01g09160	Glyma01g09160	Glyma01g09160	Gm01:10877246-10880169	14-7-0	14-7-14	OK	1.94983	3.04144	0.641405	-0.778856	0.436064	0.748733	no
Glyma01g09190	Glyma01g09190	Glyma01g09190	Gm01:10916139-10919654	14-7-0	14-7-14	NOTEST	0	0	0	0	1	1	no
Glyma01g09205	Glyma01g09205	Glyma01g09205	Gm01:10925539-10932891	14-7-0	14-7-14	OK	2.98534	0.0352416	-6.40447	2.48698	0.0128834	0.112243	no
Glyma01g09220	Glyma01g09220	Glyma01g09220	Gm01:10985768-10988999	14-7-0	14-7-14	OK	2.4187	2.77968	0.200688	-0.243061	0.807958	0.937959	no
Glyma01g09251	Glyma01g09251	Glyma01g09251	Gm01:11062433-11064112	14-7-0	14-7-14	NOTEST	0	0	0	0	1	1	no
Glyma01g09280	Glyma01g09280	Glyma01g09280	Gm01:11172148-11173850	14-7-0	14-7-14	NOTEST	0	0	0	0	1	1	no
Glyma01g09290	Glyma01g09290	Glyma01g09290	Gm01:11208547-11216038	14-7-0	14-7-14	OK	4.52273	2.68756	-0.750895	0.957002	0.338566	0.66828	no
Glyma01g09310	Glyma01g09310	Glyma01g09310	Gm01:11247803-11256961	14-7-0	14-7-14	OK	65.5733	30.8348	-1.08855	1.17618	0.239523	0.566592	no
Glyma01g09340	Glyma01g09340	Glyma01g09340	Gm01:11290152-11290409	14-7-0	14-7-14	NOTEST	0	0	0	0	1	1	no
Glyma01g09350	Glyma01g09350	Glyma01g09350	Gm01:11294639-11296592	14-7-0	14-7-14	NOTEST	0	0	0	0	1	1	no
Glyma01g09360	Glyma01g09360	Glyma01g09360	Gm01:11308064-11312690	14-7-0	14-7-14	OK	0.139461	3.01257	4.43306	-3.92412	8.70466e-05	0.00374564	yes
Glyma01g09381	Glyma01g09381	Glyma01g09381	Gm01:11366555-11369128	14-7-0	14-7-14	NOTEST	0	0	0	0	1	1	no
Glyma01g09400	Glyma01g09400	Glyma01g09400	Gm01:11464172-11469476	14-7-0	14-7-14	OK	6.42466	5.63849	-0.188312	0.232306	0.8163	0.940976	no
Glyma01g09410	Glyma01g09410	Glyma01g09410	Gm01:11464172-11469476	14-7-0	14-7-14	NOTEST	0	0	0	0	1	1	no
Glyma01g09420	Glyma01g09420	Glyma01g09420	Gm01:11496634-11503018	14-7-0	14-7-14	OK	2.76489	2.87973	0.0587082	-0.0747791	0.94039	0.982426	no
Glyma01g09460	Glyma01g09460	Glyma01g09460	Gm01:11555183-11556227	14-7-0	14-7-14	OK	0.259977	1.78896	2.78267	-2.29439	0.0217684	0.153956	no
Glyma01g09481	Glyma01g09481	Glyma01g09481	Gm01:11560220-11561128	14-7-0	14-7-14	NOTEST	0	0	0	0	1	1	no
Glyma01g09500	Glyma01g09500	Glyma01g09500	Gm01:11608787-11608970	14-7-0	14-7-14	NOTEST	0	0	0	0	1	1	no
Glyma01g09510	Glyma01g09510	Glyma01g09510	Gm01:11675230-11676337	14-7-0	14-7-14	NOTEST	0	0	0	0	1	1	no
Glyma01g09515	Glyma01g09515	Glyma01g09515	Gm01:11687514-11688465	14-7-0	14-7-14	NOTEST	0	0	0	0	1	1	no
Glyma01g09520	Glyma01g09520	Glyma01g09520	Gm01:11695475-11701510	14-7-0	14-7-14	OK	20.3706	16.5165	-0.302582	0.402499	0.687317	0.887905	no
Glyma01g09530	Glyma01g09530	Glyma01g09530	Gm01:11703243-11703468	14-7-0	14-7-14	OK	5.74511	5.31272	-0.112885	0.0648391	0.948302	0.984925	no
Glyma01g09540	Glyma01g09540	Glyma01g09540	Gm01:11708034-11708550	14-7-0	14-7-14	NOTEST	0	0	0	0	1	1	no
Glyma01g09581	Glyma01g09581	Glyma01g09581	Gm01:11738401-11738872	14-7-0	14-7-14	NOTEST	0	0	0	0	1	1	no
Glyma01g09620	Glyma01g09620	Glyma01g09620	Gm01:11916861-11920298	14-7-0	14-7-14	NOTEST	0	0	0	0	1	1	no
Glyma01g09631	Glyma01g09631	Glyma01g09631	Gm01:11934522-11935027	14-7-0	14-7-14	NOTEST	0	0	0	0	1	1	no
Glyma01g09640	Glyma01g09640	Glyma01g09640	Gm01:11967121-11968573	14-7-0	14-7-14	OK	3.68391	2.40389	-0.615865	0.728978	0.466015	0.768533	no
Glyma01g09650	Glyma01g09650	Glyma01g09650	Gm01:11971139-11974007	14-7-0	14-7-14	OK	0	0.519418	1.79769e+308	1.79769e+308	0.0367238	0.201879	no
Glyma01g09660	Glyma01g09660	Glyma01g09660	Gm01:11996466-12008222	14-7-0	14-7-14	OK	2.61149	0.674806	-1.95233	2.19427	0.0282158	0.176635	no
Glyma01g09860	Glyma01g09860	Glyma01g09860	Gm01:12384414-12385443	14-7-0	14-7-14	NOTEST	0	0	0	0	1	1	no
Glyma01g09900	Glyma01g09900	Glyma01g09900	Gm01:12528614-12537191	14-7-0	14-7-14	OK	1.24535	0.196578	-2.66338	1.86206	0.0625953	0.271349	no
Glyma01g09920	Glyma01g09920	Glyma01g09920	Gm01:12588417-12590126	14-7-0	14-7-14	OK	4.25096	3.21254	-0.404073	0.500942	0.616412	0.854805	no
Glyma01g09948	Glyma01g09948	Glyma01g09948	Gm01:12598148-12598766	14-7-0	14-7-14	NOTEST	0	0	0	0	1	1	no
Glyma01g09976	Glyma01g09976	Glyma01g09976	Gm01:12599050-12599537	14-7-0	14-7-14	NOTEST	0	0	0	0	1	1	no
Glyma01g10004	Glyma01g10004	Glyma01g10004	Gm01:12745024-12746402	14-7-0	14-7-14	NOTEST	0	0	0	0	1	1	no
Glyma01g10032	Glyma01g10032	Glyma01g10032	Gm01:12760733-12762383	14-7-0	14-7-14	NOTEST	0	0	0	0	1	1	no
Glyma01g10060	Glyma01g10060	Glyma01g10060	Gm01:12803637-12806519	14-7-0	14-7-14	NOTEST	0	0	0	0	1	1	no
Glyma01g10070	Glyma01g10070	Glyma01g10070	Gm01:12864161-12867113	14-7-0	14-7-14	LOWDATA	0	0	-1.43552	0	1	1	no
Glyma01g10081	Glyma01g10081	Glyma01g10081	Gm01:12864161-12867113	14-7-0	14-7-14	OK	419.863	155.229	-1.43552	1.16117	0.245573	0.573566	no
Glyma01g10090	Glyma01g10090	Glyma01g10090	Gm01:12870303-12870537	14-7-0	14-7-14	NOTEST	0	0	0	0	1	1	no
Glyma01g10100	Glyma01g10100	Glyma01g10100	Gm01:12915879-12921146	14-7-0	14-7-14	OK	1.64026	1.68022	0.0347231	-0.0435426	0.965269	0.989846	no
Glyma01g10121	Glyma01g10121	Glyma01g10121	Gm01:13008740-13009964	14-7-0	14-7-14	NOTEST	0.152394	0	-1.79769e+308	-1.79769e+308	0.0965277	1	no
Glyma01g10141	Glyma01g10141	Glyma01g10141	Gm01:13045087-13045509	14-7-0	14-7-14	NOTEST	0	0	0	0	1	1	no
Glyma01g10160	Glyma01g10160	Glyma01g10160	Gm01:13068289-13070591	14-7-0	14-7-14	OK	1.05613	1.9792	0.906127	-0.739755	0.459449	0.764119	no
Glyma01g10183	Glyma01g10183	Glyma01g10183	Gm01:13094881-13100738	14-7-0	14-7-14	NOTEST	0	0	0	0	1	1	no
Glyma01g10206	Glyma01g10206	Glyma01g10206	Gm01:13259515-13263715	14-7-0	14-7-14	NOTEST	0	0	0	0	1	1	no
Glyma01g10231	Glyma01g10231	Glyma01g10231	Gm01:13305441-13308517	14-7-0	14-7-14	NOTEST	0	0	0	0	1	1	no
Glyma01g10254	Glyma01g10254	Glyma01g10254	Gm01:13309389-13321481	14-7-0	14-7-14	NOTEST	0.0336665	0.0435801	0.372354	-0.276582	0.782101	1	no
Glyma01g10278	Glyma01g10278	Glyma01g10278	Gm01:13324783-13327645	14-7-0	14-7-14	NOTEST	0	0	0	0	1	1	no
Glyma01g10302	Glyma01g10302	Glyma01g10302	Gm01:13355409-13356481	14-7-0	14-7-14	NOTEST	0	0	0	0	1	1	no
Glyma01g10326	Glyma01g10326	Glyma01g10326	Gm01:13416710-13417813	14-7-0	14-7-14	NOTEST	0	0	0	0	1	1	no
Glyma01g10350	Glyma01g10350	Glyma01g10350	Gm01:13419562-13420937	14-7-0	14-7-14	NOTEST	0	0	0	0	1	1	no
Glyma01g10371	Glyma01g10371	Glyma01g10371	Gm01:13433576-13434202	14-7-0	14-7-14	OK	2.32489	2.48193	0.0943005	-0.0915923	0.927022	0.977547	no
Glyma01g10390	Glyma01g10390	Glyma01g10390	Gm01:13444506-13445181	14-7-0	14-7-14	OK	1.55519	0.909232	-0.774371	0.637476	0.523815	0.804146	no
Glyma01g10600	Glyma01g10600	Glyma01g10600	Gm01:13782194-13783121	14-7-0	14-7-14	NOTEST	0	0	0	0	1	1	no
Glyma01g10610	Glyma01g10610	Glyma01g10610	Gm01:13795843-13799755	14-7-0	14-7-14	OK	1.95351	2.999	0.618412	-0.773229	0.439387	0.750589	no
Glyma01g10730	Glyma01g10730	Glyma01g10730	Gm01:13960625-13962588	14-7-0	14-7-14	NOTEST	0.490954	0.480679	-0.0305132	0.0221311	0.982343	1	no
Glyma01g10850	Glyma01g10850	Glyma01g10850	Gm01:14070871-14087892	14-7-0	14-7-14	OK	4.72238	1.18526	-1.99431	2.19234	0.028355	0.177012	no
Glyma01g10880	Glyma01g10880	Glyma01g10880	Gm01:14112119-14118766	14-7-0	14-7-14	OK	2.26521	2.87915	0.345998	-0.400855	0.688527	0.888559	no
Glyma01g10900	Glyma01g10900	Glyma01g10900	Gm01:14129302-14130710	14-7-0	14-7-14	NOTEST	0	0	0	0	1	1	no
Glyma01g11110	Glyma01g11110	Glyma01g11110	Gm01:14247142-14248189	14-7-0	14-7-14	NOTEST	0	0.0326188	1.79769e+308	1.79769e+308	0.223676	1	no
Glyma01g11130	Glyma01g11130	Glyma01g11130	Gm01:14320794-14324110	14-7-0	14-7-14	NOTEST	0	0.193453	1.79769e+308	1.79769e+308	0.0644759	1	no
Glyma01g11180	Glyma01g11180	Glyma01g11180	Gm01:14568533-14568824	14-7-0	14-7-14	OK	47036.3	7773.58	-2.59712	1.47935	0.139046	0.426889	no
Glyma01g11390	Glyma01g11390	Glyma01g11390	Gm01:14807028-14809655	14-7-0	14-7-14	OK	23.0228	9.44095	-1.28606	1.60761	0.10792	0.370582	no
Glyma01g11473	Glyma01g11473	Glyma01g11473	Gm01:14947313-14947773	14-7-0	14-7-14	NOTEST	0	0	0	0	1	1	no
Glyma01g11556	Glyma01g11556	Glyma01g11556	Gm01:14947841-14948129	14-7-0	14-7-14	NOTEST	0	0	0	0	1	1	no
Glyma01g11640	Glyma01g11640	Glyma01g11640	Gm01:14972818-14973806	14-7-0	14-7-14	OK	73.8486	16.9222	-2.12565	2.88288	0.00394056	0.0539973	no
Glyma01g11755	Glyma01g11755	Glyma01g11755	Gm01:15083417-15085790	14-7-0	14-7-14	NOTEST	0	0	0	0	1	1	no
Glyma01g11870	Glyma01g11870	Glyma01g11870	Gm01:15195053-15195880	14-7-0	14-7-14	OK	96.0899	5.07333	-4.24338	5.14984	2.60705e-07	4.28435e-05	yes
Glyma01g12310	Glyma01g12310	Glyma01g12310	Gm01:15500343-15500912	14-7-0	14-7-14	NOTEST	0	0	0	0	1	1	no
Glyma01g12340	Glyma01g12340	Glyma01g12340	Gm01:15542210-15548262	14-7-0	14-7-14	OK	13.2629	10.1526	-0.385547	0.521085	0.602308	0.847559	no
Glyma01g12740	Glyma01g12740	Glyma01g12740	Gm01:15937028-15939729	14-7-0	14-7-14	OK	6.67925	2.34838	-1.50802	2.10245	0.035514	0.198363	no
Glyma01g12840	Glyma01g12840	Glyma01g12840	Gm01:15948220-15953470	14-7-0	14-7-14	OK	0.718219	0.297791	-1.27012	0.883057	0.377205	0.702211	no
Glyma01g12940	Glyma01g12940	Glyma01g12940	Gm01:16087453-16089518	14-7-0	14-7-14	OK	2.03788	1.30242	-0.645877	0.704075	0.481386	0.778343	no
Glyma01g12955	Glyma01g12955	Glyma01g12955	Gm01:16103170-16106499	14-7-0	14-7-14	NOTEST	0	0	0	0	1	1	no
Glyma01g12970	Glyma01g12970	Glyma01g12970	Gm01:16134796-16136261	14-7-0	14-7-14	OK	8.93866	6.28521	-0.508098	0.711382	0.476848	0.775801	no
Glyma01g13170	Glyma01g13170	Glyma01g13170	Gm01:16335425-16339127	14-7-0	14-7-14	OK	56.0832	40.6913	-0.462849	0.518097	0.60439	0.848143	no
Glyma01g13390	Glyma01g13390	Glyma01g13390	Gm01:16722784-16724403	14-7-0	14-7-14	NOTEST	0	0	0	0	1	1	no
Glyma01g13400	Glyma01g13400	Glyma01g13400	Gm01:16727753-16728455	14-7-0	14-7-14	NOTEST	0	0	0	0	1	1	no
Glyma01g13410	Glyma01g13410	Glyma01g13410	Gm01:16732842-16733939	14-7-0	14-7-14	NOTEST	0.366173	0	-1.79769e+308	-1.79769e+308	0.0456007	1	no
Glyma01g13532	Glyma01g13532	Glyma01g13532	Gm01:16745457-16750194	14-7-0	14-7-14	OK	0.676079	0.732312	0.115268	-0.0875501	0.930234	0.978811	no
Glyma01g13654	Glyma01g13654	Glyma01g13654	Gm01:16827427-16868761	14-7-0	14-7-14	OK	3.78509	3.85317	0.0257187	-0.0309751	0.975289	0.992781	no
Glyma01g13777	Glyma01g13777	Glyma01g13777	Gm01:16940733-16941754	14-7-0	14-7-14	NOTEST	0	0	0	0	1	1	no
Glyma01g13900	Glyma01g13900	Glyma01g13900	Gm01:17306260-17308391	14-7-0	14-7-14	NOTEST	0	0.0208735	1.79769e+308	1.79769e+308	0.223676	1	no
Glyma01g13930	Glyma01g13930	Glyma01g13930	Gm01:17320003-17321677	14-7-0	14-7-14	NOTEST	0.352394	0.370842	0.0736179	-0.0639209	0.949033	1	no
Glyma01g13945	Glyma01g13945	Glyma01g13945	Gm01:17420498-17470577	14-7-0	14-7-14	OK	0.255714	0.643952	1.33242	-1.16026	0.245943	0.573931	no
Glyma01g13960	Glyma01g13960	Glyma01g13960	Gm01:17481711-17482061	14-7-0	14-7-14	NOTEST	0	0	0	0	1	1	no
Glyma01g14160	Glyma01g14160	Glyma01g14160	Gm01:17627819-17629241	14-7-0	14-7-14	NOTEST	0	0	0	0	1	1	no
Glyma01g14266	Glyma01g14266	Glyma01g14266	Gm01:17633685-17639586	14-7-0	14-7-14	NOTEST	0	0	0	0	1	1	no
Glyma01g14373	Glyma01g14373	Glyma01g14373	Gm01:18006948-18034570	14-7-0	14-7-14	OK	2.54841	6.31457	1.30909	-1.78407	0.0744125	0.299342	no
Glyma01g14480	Glyma01g14480	Glyma01g14480	Gm01:18042133-18046082	14-7-0	14-7-14	OK	15.8913	18.014	0.180882	-0.25594	0.797997	0.93477	no
Glyma01g14500	Glyma01g14500	Glyma01g14500	Gm01:18130228-18132625	14-7-0	14-7-14	NOTEST	0	0	0	0	1	1	no
Glyma01g14700	Glyma01g14700	Glyma01g14700	Gm01:18300892-18301399	14-7-0	14-7-14	OK	2.31225	3.76996	0.705255	-0.67069	0.502418	0.790549	no
Glyma01g14733	Glyma01g14733	Glyma01g14733	Gm01:18318922-18323085	14-7-0	14-7-14	OK	1.46576	0.874072	-0.745821	0.820804	0.411758	0.730158	no
Glyma01g14766	Glyma01g14766	Glyma01g14766	Gm01:18346082-18347761	14-7-0	14-7-14	OK	0.605565	0.399486	-0.600135	0.542388	0.587552	0.840207	no
Glyma01g14800	Glyma01g14800	Glyma01g14800	Gm01:18356149-18373966	14-7-0	14-7-14	OK	4.7347	3.87869	-0.287705	0.381912	0.702527	0.895219	no
Glyma01g14905	Glyma01g14905	Glyma01g14905	Gm01:18507857-18508875	14-7-0	14-7-14	NOTEST	0	0	0	0	1	1	no
Glyma01g15010	Glyma01g15010	Glyma01g15010	Gm01:18517441-18518370	14-7-0	14-7-14	NOTEST	0	0	0	0	1	1	no
Glyma01g15134	Glyma01g15134	Glyma01g15134	Gm01:18526281-18533321	14-7-0	14-7-14	OK	2.48839	0.463995	-2.42303	2.52135	0.0116905	0.105956	no
Glyma01g15258	Glyma01g15258	Glyma01g15258	Gm01:18637238-18640215	14-7-0	14-7-14	NOTEST	0	0.165463	1.79769e+308	1.79769e+308	0.0558529	1	no
Glyma01g15382	Glyma01g15382	Glyma01g15382	Gm01:18694961-18695204	14-7-0	14-7-14	NOTEST	0	0	0	0	1	1	no
Glyma01g15506	Glyma01g15506	Glyma01g15506	Gm01:18952413-18962622	14-7-0	14-7-14	OK	26.2278	18.0915	-0.535791	0.574676	0.565511	0.827364	no
Glyma01g15630	Glyma01g15630	Glyma01g15630	Gm01:19254139-19255483	14-7-0	14-7-14	NOTEST	0.444202	0.458745	0.0464762	-0.0387735	0.969071	1	no
Glyma01g15687	Glyma01g15687	Glyma01g15687	Gm01:19474756-19475786	14-7-0	14-7-14	NOTEST	0	0	0	0	1	1	no
Glyma01g15744	Glyma01g15744	Glyma01g15744	Gm01:19561924-19565934	14-7-0	14-7-14	NOTEST	0	0	0	0	1	1	no
Glyma01g15802	Glyma01g15802	Glyma01g15802	Gm01:19569955-19570642	14-7-0	14-7-14	NOTEST	0	0	0	0	1	1	no
Glyma01g15860	Glyma01g15860	Glyma01g15860	Gm01:19642510-19643505	14-7-0	14-7-14	NOTEST	0	0	0	0	1	1	no
Glyma01g15883	Glyma01g15883	Glyma01g15883	Gm01:19661251-19662687	14-7-0	14-7-14	NOTEST	0	0	0	0	1	1	no
Glyma01g15906	Glyma01g15906	Glyma01g15906	Gm01:19730841-19731653	14-7-0	14-7-14	NOTEST	0	0	0	0	1	1	no
Glyma01g15930	Glyma01g15930	Glyma01g15930	Gm01:19793857-19799930	14-7-0	14-7-14	OK	39.6977	16.8663	-1.23492	1.58671	0.112579	0.378461	no
Glyma01g16140	Glyma01g16140	Glyma01g16140	Gm01:20041371-20043743	14-7-0	14-7-14	OK	0	1.73485	1.79769e+308	1.79769e+308	0.0189361	0.141492	no
Glyma01g16250	Glyma01g16250	Glyma01g16250	Gm01:20048200-20050535	14-7-0	14-7-14	NOTEST	0	0	0	0	1	1	no
Glyma01g16360	Glyma01g16360	Glyma01g16360	Gm01:20233418-20235447	14-7-0	14-7-14	OK	0.337635	1.95627	2.53457	-2.20835	0.0272201	0.173272	no
Glyma01g16370	Glyma01g16370	Glyma01g16370	Gm01:20243646-20255339	14-7-0	14-7-14	OK	7.37971	6.22817	-0.244757	0.283745	0.776606	0.926446	no
Glyma01g16375	Glyma01g16375	Glyma01g16375	Gm01:20243646-20255339	14-7-0	14-7-14	OK	6.62274	1.92161	-1.78511	0.318909	0.749795	0.915356	no
Glyma01g16380	Glyma01g16380	Glyma01g16380	Gm01:20340974-20356558	14-7-0	14-7-14	OK	33.2244	14.9312	-1.15392	1.49444	0.13506	0.419534	no
Glyma01g16526	Glyma01g16526	Glyma01g16526	Gm01:20473820-20507463	14-7-0	14-7-14	OK	7.12228	5.18065	-0.459205	0.479691	0.631447	0.861954	no
Glyma01g16673	Glyma01g16673	Glyma01g16673	Gm01:20473820-20507463	14-7-0	14-7-14	NOTEST	0.214568	0.369627	0.784632	-0.245699	0.805916	1	no
Glyma01g16820	Glyma01g16820	Glyma01g16820	Gm01:20713503-20720624	14-7-0	14-7-14	OK	3.27791	3.71894	0.182115	-0.24762	0.804428	0.936536	no
Glyma01g17030	Glyma01g17030	Glyma01g17030	Gm01:21011809-21014457	14-7-0	14-7-14	NOTEST	0.463202	0.456306	-0.0216388	0.0160376	0.987204	1	no
Glyma01g17230	Glyma01g17230	Glyma01g17230	Gm01:21161585-21162372	14-7-0	14-7-14	OK	11.0166	6.01547	-0.872935	1.09866	0.271918	0.602802	no
Glyma01g17240	Glyma01g17240	Glyma01g17240	Gm01:21232889-21235373	14-7-0	14-7-14	OK	1.47006	0.680605	-1.11099	1.05824	0.289945	0.621246	no
Glyma01g17271	Glyma01g17271	Glyma01g17271	Gm01:21300956-21302664	14-7-0	14-7-14	NOTEST	0	0	0	0	1	1	no
Glyma01g17300	Glyma01g17300	Glyma01g17300	Gm01:21447376-21448520	14-7-0	14-7-14	OK	63.3356	13.3015	-2.25143	3.03612	0.00239641	0.0386058	yes
Glyma01g17330	Glyma01g17330	Glyma01g17330	Gm01:21487778-21490647	14-7-0	14-7-14	NOTEST	0	0	0	0	1	1	no
Glyma01g17350	Glyma01g17350	Glyma01g17350	Gm01:21601999-21604652	14-7-0	14-7-14	OK	3.08227	3.83982	0.317046	-0.43542	0.663258	0.876903	no
Glyma01g17426	Glyma01g17426	Glyma01g17426	Gm01:21677182-21677611	14-7-0	14-7-14	NOTEST	0	0	0	0	1	1	no
Glyma01g17503	Glyma01g17503	Glyma01g17503	Gm01:21677719-21680521	14-7-0	14-7-14	NOTEST	0	0	0	0	1	1	no
Glyma01g17580	Glyma01g17580	Glyma01g17580	Gm01:21886080-21888825	14-7-0	14-7-14	NOTEST	0	0.0371354	1.79769e+308	1.79769e+308	0.207108	1	no
Glyma01g17590	Glyma01g17590	Glyma01g17590	Gm01:21937384-21937864	14-7-0	14-7-14	OK	0	0.516929	1.79769e+308	1.79769e+308	0.0777245	0.30665	no
Glyma01g17820	Glyma01g17820	Glyma01g17820	Gm01:22078170-22079110	14-7-0	14-7-14	OK	44.2273	21.5373	-1.0381	1.45402	0.14594	0.43791	no
Glyma01g17850	Glyma01g17850	Glyma01g17850	Gm01:22130113-22137111	14-7-0	14-7-14	OK	47.4503	30.9359	-0.617133	0.647967	0.517006	0.800254	no
Glyma01g17870	Glyma01g17870	Glyma01g17870	Gm01:22202473-22210341	14-7-0	14-7-14	OK	25.478	11.0352	-1.20714	1.42498	0.154162	0.451307	no
Glyma01g17880	Glyma01g17880	Glyma01g17880	Gm01:22222121-22222938	14-7-0	14-7-14	NOTEST	0	0	0	0	1	1	no
Glyma01g18040	Glyma01g18040	Glyma01g18040	Gm01:22484144-22487576	14-7-0	14-7-14	OK	9.37189	6.61894	-0.501739	0.69984	0.484027	0.780454	no
Glyma01g18200	Glyma01g18200	Glyma01g18200	Gm01:22687069-22688346	14-7-0	14-7-14	OK	7.54396	3.1163	-1.27549	0.923968	0.355503	0.683522	no
Glyma01g18360	Glyma01g18360	Glyma01g18360	Gm01:22689358-22689601	14-7-0	14-7-14	OK	14.4459	0.751245	-4.26523	2.07685	0.0378154	0.204816	no
Glyma01g18520	Glyma01g18520	Glyma01g18520	Gm01:22790155-22793135	14-7-0	14-7-14	NOTEST	0	0	0	0	1	1	no
Glyma01g18606	Glyma01g18606	Glyma01g18606	Gm01:23174174-23175344	14-7-0	14-7-14	NOTEST	0	0.0251808	1.79769e+308	1.79769e+308	0.223676	1	no
Glyma01g18693	Glyma01g18693	Glyma01g18693	Gm01:23245420-23247113	14-7-0	14-7-14	NOTEST	0	0	0	0	1	1	no
Glyma01g18780	Glyma01g18780	Glyma01g18780	Gm01:23303293-23306986	14-7-0	14-7-14	OK	23.5669	11.5023	-1.03484	1.44021	0.149809	0.443998	no
Glyma01g18885	Glyma01g18885	Glyma01g18885	Gm01:23422050-23424265	14-7-0	14-7-14	NOTEST	0	0	0	0	1	1	no
Glyma01g18990	Glyma01g18990	Glyma01g18990	Gm01:23424891-23425203	14-7-0	14-7-14	NOTEST	0	0	0	0	1	1	no
Glyma01g19200	Glyma01g19200	Glyma01g19200	Gm01:23586981-23590259	14-7-0	14-7-14	OK	5.00126	3.81083	-0.392184	0.453341	0.650303	0.870737	no
Glyma01g19420	Glyma01g19420	Glyma01g19420	Gm01:23910735-23912214	14-7-0	14-7-14	OK	25.7779	4.71226	-2.45165	3.32457	0.000885558	0.0196169	yes
Glyma01g19820	Glyma01g19820	Glyma01g19820	Gm01:24220923-24227067	14-7-0	14-7-14	OK	1.12154	2.5697	1.19612	-1.36948	0.170849	0.477015	no
Glyma01g20030	Glyma01g20030	Glyma01g20030	Gm01:24388541-24405141	14-7-0	14-7-14	OK	6.50168	8.86478	0.447272	-0.451229	0.651824	0.871629	no
Glyma01g20130	Glyma01g20130	Glyma01g20130	Gm01:24561667-24562473	14-7-0	14-7-14	NOTEST	0	0	0	0	1	1	no
Glyma01g20230	Glyma01g20230	Glyma01g20230	Gm01:24590327-24594299	14-7-0	14-7-14	OK	1.16667	5.04574	2.11266	-2.20541	0.0274254	0.174145	no
Glyma01g20306	Glyma01g20306	Glyma01g20306	Gm01:24680832-24681420	14-7-0	14-7-14	NOTEST	0	0	0	0	1	1	no
Glyma01g20383	Glyma01g20383	Glyma01g20383	Gm01:24850234-24853077	14-7-0	14-7-14	OK	10.7038	2.0324	-2.39687	3.08429	0.00204041	0.0349359	yes
Glyma01g20460	Glyma01g20460	Glyma01g20460	Gm01:24945683-24950931	14-7-0	14-7-14	OK	16.7492	34.8934	1.05886	-1.31503	0.1885	0.503555	no
Glyma01g20565	Glyma01g20565	Glyma01g20565	Gm01:25139086-25141476	14-7-0	14-7-14	NOTEST	0	0	0	0	1	1	no
Glyma01g20670	Glyma01g20670	Glyma01g20670	Gm01:25147643-25157143	14-7-0	14-7-14	OK	15.3293	22.4892	0.552942	-0.766858	0.443166	0.753189	no
Glyma01g20700	Glyma01g20700	Glyma01g20700	Gm01:25222324-25227920	14-7-0	14-7-14	OK	10.8112	34.1082	1.6576	-2.17526	0.0296109	0.18104	no
Glyma01g20710	Glyma01g20710	Glyma01g20710	Gm01:25241778-25246814	14-7-0	14-7-14	NOTEST	0	0.0457874	1.79769e+308	1.79769e+308	0.0940746	1	no
Glyma01g20720	Glyma01g20720	Glyma01g20720	Gm01:25343080-25358309	14-7-0	14-7-14	OK	0.675984	3.92583	2.53794	-2.85303	0.00433041	0.0572932	no
Glyma01g20740	Glyma01g20740	Glyma01g20740	Gm01:25402501-25405946	14-7-0	14-7-14	OK	0.99656	0.664243	-0.585246	0.558794	0.576302	0.834384	no
Glyma01g20751	Glyma01g20751	Glyma01g20751	Gm01:25409531-25409921	14-7-0	14-7-14	NOTEST	0	0	0	0	1	1	no
Glyma01g20760	Glyma01g20760	Glyma01g20760	Gm01:25500530-25509163	14-7-0	14-7-14	OK	21.2657	17.2442	-0.30242	0.363651	0.716119	0.901344	no
Glyma01g20775	Glyma01g20775	Glyma01g20775	Gm01:25559739-25563228	14-7-0	14-7-14	OK	21.1297	26.4922	0.326297	-0.420345	0.674234	0.882437	no
Glyma01g20790	Glyma01g20790	Glyma01g20790	Gm01:25566713-25569152	14-7-0	14-7-14	OK	0.648073	2.38478	1.87963	-1.72238	0.0850014	0.323345	no
Glyma01g20800	Glyma01g20800	Glyma01g20800	Gm01:25569808-25571509	14-7-0	14-7-14	NOTEST	0	0.260169	1.79769e+308	1.79769e+308	0.0702947	1	no
Glyma01g20811	Glyma01g20811	Glyma01g20811	Gm01:25640214-25651295	14-7-0	14-7-14	OK	13.4911	5.46119	-1.30472	1.68003	0.0929513	0.340668	no
Glyma01g20820	Glyma01g20820	Glyma01g20820	Gm01:25640214-25651295	14-7-0	14-7-14	LOWDATA	0	0	-1.30472	0	1	1	no
Glyma01g20860	Glyma01g20860	Glyma01g20860	Gm01:25711548-25714121	14-7-0	14-7-14	OK	44.9894	53.4322	0.248123	-0.295681	0.767474	0.923054	no
Glyma01g20870	Glyma01g20870	Glyma01g20870	Gm01:25714752-25716813	14-7-0	14-7-14	NOTEST	0.157694	0.380109	1.26928	-0.998244	0.318161	1	no
Glyma01g20885	Glyma01g20885	Glyma01g20885	Gm01:25783765-25787946	14-7-0	14-7-14	NOTEST	0	0	0	0	1	1	no
Glyma01g20900	Glyma01g20900	Glyma01g20900	Gm01:25807514-25813526	14-7-0	14-7-14	NOTEST	0	0	0	0	1	1	no
Glyma01g20910	Glyma01g20910	Glyma01g20910	Gm01:25867401-25867807	14-7-0	14-7-14	NOTEST	0	0	0	0	1	1	no
Glyma01g20920	Glyma01g20920	Glyma01g20920	Gm01:25867821-25870459	14-7-0	14-7-14	OK	4.99255	2.04839	-1.28529	1.29046	0.19689	0.514865	no
Glyma01g20935	Glyma01g20935	Glyma01g20935	Gm01:25874290-25875066	14-7-0	14-7-14	NOTEST	0	0.203798	1.79769e+308	1.79769e+308	0.141284	1	no
Glyma01g20950	Glyma01g20950	Glyma01g20950	Gm01:26043470-26048530	14-7-0	14-7-14	OK	2.10078	0.626899	-1.74462	1.90105	0.0572953	0.257946	no
Glyma01g20970	Glyma01g20970	Glyma01g20970	Gm01:26111521-26112660	14-7-0	14-7-14	NOTEST	0	0	0	0	1	1	no
Glyma01g20980	Glyma01g20980	Glyma01g20980	Gm01:26203747-26206343	14-7-0	14-7-14	NOTEST	0	0	0	0	1	1	no
Glyma01g20986	Glyma01g20986	Glyma01g20986	Gm01:26214735-26217244	14-7-0	14-7-14	NOTEST	0	0	0	0	1	1	no
Glyma01g20993	Glyma01g20993	Glyma01g20993	Gm01:26218166-26218983	14-7-0	14-7-14	NOTEST	0	0	0	0	1	1	no
Glyma01g21000	Glyma01g21000	Glyma01g21000	Gm01:26227617-26228265	14-7-0	14-7-14	NOTEST	0	0	0	0	1	1	no
Glyma01g21120	Glyma01g21120	Glyma01g21120	Gm01:26230555-26237293	14-7-0	14-7-14	NOTEST	0	0.0179721	1.79769e+308	1.79769e+308	0.336893	1	no
Glyma01g21241	Glyma01g21241	Glyma01g21241	Gm01:26358875-26362351	14-7-0	14-7-14	NOTEST	0	0	0	0	1	1	no
Glyma01g21360	Glyma01g21360	Glyma01g21360	Gm01:26380864-26392487	14-7-0	14-7-14	OK	3.57229	7.28323	1.02773	-1.2798	0.200614	0.519315	no
Glyma01g21480	Glyma01g21480	Glyma01g21480	Gm01:26542098-26544485	14-7-0	14-7-14	OK	1.27893	2.44266	0.933513	-1.12046	0.262519	0.592694	no
Glyma01g21500	Glyma01g21500	Glyma01g21500	Gm01:26596018-26599902	14-7-0	14-7-14	OK	60.918	17.3071	-1.8155	2.45007	0.014283	0.119554	no
Glyma01g21510	Glyma01g21510	Glyma01g21510	Gm01:26672645-26677024	14-7-0	14-7-14	OK	2.03348	1.48472	-0.45376	0.377677	0.705671	0.896656	no
Glyma01g21521	Glyma01g21521	Glyma01g21521	Gm01:26725662-26726466	14-7-0	14-7-14	NOTEST	0	0	0	0	1	1	no
Glyma01g21530	Glyma01g21530	Glyma01g21530	Gm01:26737266-26739888	14-7-0	14-7-14	NOTEST	0	0	0	0	1	1	no
Glyma01g21540	Glyma01g21540	Glyma01g21540	Gm01:26740703-26749646	14-7-0	14-7-14	NOTEST	0.391238	0.315746	-0.309285	0.222001	0.824313	1	no
Glyma01g21570	Glyma01g21570	Glyma01g21570	Gm01:26771286-26773122	14-7-0	14-7-14	NOTEST	0	0.0387689	1.79769e+308	1.79769e+308	0.223676	1	no
Glyma01g21575	Glyma01g21575	Glyma01g21575	Gm01:26798193-26799005	14-7-0	14-7-14	NOTEST	0	0	0	0	1	1	no
Glyma01g21580	Glyma01g21580	Glyma01g21580	Gm01:26814403-26817180	14-7-0	14-7-14	NOTEST	0.136066	0	-1.79769e+308	-1.79769e+308	0.0651685	1	no
Glyma01g21590	Glyma01g21590	Glyma01g21590	Gm01:26883578-26885952	14-7-0	14-7-14	NOTEST	0	0	0	0	1	1	no
Glyma01g21620	Glyma01g21620	Glyma01g21620	Gm01:26918441-26921225	14-7-0	14-7-14	OK	0.59964	0.459125	-0.385209	0.349181	0.726953	0.905383	no
Glyma01g21630	Glyma01g21630	Glyma01g21630	Gm01:26936772-26938129	14-7-0	14-7-14	NOTEST	0	0	0	0	1	1	no
Glyma01g21660	Glyma01g21660	Glyma01g21660	Gm01:27033743-27042354	14-7-0	14-7-14	OK	1.50164	1.66801	0.151589	-0.167554	0.866934	0.960021	no
Glyma01g21680	Glyma01g21680	Glyma01g21680	Gm01:27082459-27084583	14-7-0	14-7-14	OK	6.52278	3.87201	-0.752405	0.970111	0.331991	0.662303	no
Glyma01g21707	Glyma01g21707	Glyma01g21707	Gm01:27099239-27134127	14-7-0	14-7-14	OK	1.91	3.10495	0.701002	-0.750007	0.45325	0.759727	no
Glyma01g21734	Glyma01g21734	Glyma01g21734	Gm01:27099239-27134127	14-7-0	14-7-14	OK	0.882951	0.773899	-0.190188	0.142237	0.886893	0.965065	no
Glyma01g21762	Glyma01g21762	Glyma01g21762	Gm01:27142763-27149757	14-7-0	14-7-14	NOTEST	0	0	0	0	1	1	no
Glyma01g21790	Glyma01g21790	Glyma01g21790	Gm01:27193609-27195324	14-7-0	14-7-14	NOTEST	0	0	0	0	1	1	no
Glyma01g21831	Glyma01g21831	Glyma01g21831	Gm01:27209475-27244035	14-7-0	14-7-14	OK	0.402759	0.694814	0.786708	-0.589533	0.555504	0.822206	no
Glyma01g21870	Glyma01g21870	Glyma01g21870	Gm01:27283470-27283944	14-7-0	14-7-14	NOTEST	0	0	0	0	1	1	no
Glyma01g21900	Glyma01g21900	Glyma01g21900	Gm01:27377288-27379936	14-7-0	14-7-14	OK	3.15114	0.619331	-2.34709	2.47987	0.0131431	0.113661	no
Glyma01g22120	Glyma01g22120	Glyma01g22120	Gm01:27653934-27655968	14-7-0	14-7-14	NOTEST	0	0	0	0	1	1	no
Glyma01g22131	Glyma01g22131	Glyma01g22131	Gm01:27671430-27681519	14-7-0	14-7-14	NOTEST	0	0	0	0	1	1	no
Glyma01g22140	Glyma01g22140	Glyma01g22140	Gm01:27681952-27683220	14-7-0	14-7-14	NOTEST	0	0	0	0	1	1	no
Glyma01g22160	Glyma01g22160	Glyma01g22160	Gm01:27743827-27745117	14-7-0	14-7-14	OK	2.81419	3.19329	0.182322	-0.203155	0.839014	0.949672	no
Glyma01g22170	Glyma01g22170	Glyma01g22170	Gm01:27746481-27751766	14-7-0	14-7-14	OK	10.4324	9.91218	-0.0738022	0.104705	0.91661	0.974255	no
Glyma01g22180	Glyma01g22180	Glyma01g22180	Gm01:27781683-27784987	14-7-0	14-7-14	OK	2.05008	3.77026	0.878986	-0.919428	0.357872	0.685103	no
Glyma01g22195	Glyma01g22195	Glyma01g22195	Gm01:27825362-27840530	14-7-0	14-7-14	NOTEST	0	0.0552543	1.79769e+308	1.79769e+308	0.321714	1	no
Glyma01g22210	Glyma01g22210	Glyma01g22210	Gm01:27825362-27840530	14-7-0	14-7-14	OK	1.88647	2.57252	0.447499	-0.417905	0.676017	0.883251	no
Glyma01g22260	Glyma01g22260	Glyma01g22260	Gm01:27963645-27965402	14-7-0	14-7-14	OK	2.55206	27.8113	3.44594	-4.31679	1.58312e-05	0.00103546	yes
Glyma01g22333	Glyma01g22333	Glyma01g22333	Gm01:28079064-28083033	14-7-0	14-7-14	NOTEST	0.340576	0.0650214	-2.38899	1.12437	0.260858	1	no
Glyma01g22406	Glyma01g22406	Glyma01g22406	Gm01:28104831-28117466	14-7-0	14-7-14	OK	5.54695	7.14445	0.365127	-0.518465	0.604134	0.848012	no
Glyma01g22480	Glyma01g22480	Glyma01g22480	Gm01:28151173-28153211	14-7-0	14-7-14	OK	5.49511	8.28091	0.591642	-0.831788	0.405528	0.725288	no
Glyma01g22490	Glyma01g22490	Glyma01g22490	Gm01:28188535-28194784	14-7-0	14-7-14	OK	17.6652	6.9054	-1.35511	1.8646	0.0622381	0.270661	no
Glyma01g22501	Glyma01g22501	Glyma01g22501	Gm01:28205872-28206502	14-7-0	14-7-14	OK	0	1.12409	1.79769e+308	1.79769e+308	0.223676	0.547768	no
Glyma01g22510	Glyma01g22510	Glyma01g22510	Gm01:28236453-28241841	14-7-0	14-7-14	OK	0.608422	2.58107	2.08482	-2.19964	0.0278326	0.175344	no
Glyma01g22530	Glyma01g22530	Glyma01g22530	Gm01:28336960-28340913	14-7-0	14-7-14	NOTEST	0	0.432881	1.79769e+308	1.79769e+308	0.0658223	1	no
Glyma01g22542	Glyma01g22542	Glyma01g22542	Gm01:28390587-28392968	14-7-0	14-7-14	OK	1.864	2.77102	0.57201	-0.542154	0.587713	0.840289	no
Glyma01g22554	Glyma01g22554	Glyma01g22554	Gm01:28393068-28396339	14-7-0	14-7-14	OK	0.778052	2.98266	1.93866	-2.06473	0.0389488	0.207924	no
Glyma01g22567	Glyma01g22567	Glyma01g22567	Gm01:28416197-28418758	14-7-0	14-7-14	NOTEST	0	0	0	0	1	1	no
Glyma01g22580	Glyma01g22580	Glyma01g22580	Gm01:28513351-28526497	14-7-0	14-7-14	OK	1.71736	1.35006	-0.347168	0.352694	0.724318	0.904616	no
Glyma01g22600	Glyma01g22600	Glyma01g22600	Gm01:28536103-28539838	14-7-0	14-7-14	OK	18.9408	18.1672	-0.0601602	0.075015	0.940203	0.982403	no
Glyma01g22610	Glyma01g22610	Glyma01g22610	Gm01:28541141-28542499	14-7-0	14-7-14	OK	0.672799	0.0803381	-3.06602	1.95664	0.0503896	0.239622	no
Glyma01g22620	Glyma01g22620	Glyma01g22620	Gm01:28543689-28553173	14-7-0	14-7-14	OK	117.743	29.6109	-1.99144	1.88534	0.0593833	0.263339	no
Glyma01g22630	Glyma01g22630	Glyma01g22630	Gm01:28591482-28597660	14-7-0	14-7-14	OK	3.72301	2.6026	-0.516517	0.673445	0.500664	0.78967	no
Glyma01g22641	Glyma01g22641	Glyma01g22641	Gm01:28636476-28637827	14-7-0	14-7-14	OK	0.818833	1.90001	1.21437	-1.17974	0.238104	0.564663	no
Glyma01g22650	Glyma01g22650	Glyma01g22650	Gm01:28639438-28642822	14-7-0	14-7-14	NOTEST	0	0	0	0	1	1	no
Glyma01g22670	Glyma01g22670	Glyma01g22670	Gm01:28699702-28704423	14-7-0	14-7-14	NOTEST	0.141037	0	-1.79769e+308	-1.79769e+308	0.0651685	1	no
Glyma01g22680	Glyma01g22680	Glyma01g22680	Gm01:28708173-28714632	14-7-0	14-7-14	OK	16.7268	20.9595	0.325438	-0.394877	0.692934	0.890567	no
Glyma01g22710	Glyma01g22710	Glyma01g22710	Gm01:28768432-28773021	14-7-0	14-7-14	OK	4.38752	1.5452	-1.50561	2.01716	0.0436788	0.221016	no
Glyma01g22720	Glyma01g22720	Glyma01g22720	Gm01:28773705-28774862	14-7-0	14-7-14	OK	0.792125	0	-1.79769e+308	-1.79769e+308	0.0404649	0.212173	no
Glyma01g22730	Glyma01g22730	Glyma01g22730	Gm01:28777549-28780388	14-7-0	14-7-14	NOTEST	0	0	0	0	1	1	no
Glyma01g22751	Glyma01g22751	Glyma01g22751	Gm01:28847126-28848359	14-7-0	14-7-14	NOTEST	0	0.285549	1.79769e+308	1.79769e+308	0.0558529	1	no
Glyma01g22770	Glyma01g22770	Glyma01g22770	Gm01:28902721-28902950	14-7-0	14-7-14	NOTEST	0	0	0	0	1	1	no
Glyma01g22800	Glyma01g22800	Glyma01g22800	Gm01:28928281-28929701	14-7-0	14-7-14	NOTEST	0	0.327233	1.79769e+308	1.79769e+308	0.0376944	1	no
Glyma01g22830	Glyma01g22830	Glyma01g22830	Gm01:28986402-28988037	14-7-0	14-7-14	OK	0.134506	0.62669	2.22008	-1.6047	0.108559	0.371546	no
Glyma01g22840	Glyma01g22840	Glyma01g22840	Gm01:28991061-29005174	14-7-0	14-7-14	NOTEST	0	0.0164816	1.79769e+308	1.79769e+308	0.207108	1	no
Glyma01g22850	Glyma01g22850	Glyma01g22850	Gm01:29076299-29082231	14-7-0	14-7-14	NOTEST	0	0	0	0	1	1	no
Glyma01g22861	Glyma01g22861	Glyma01g22861	Gm01:29092183-29093676	14-7-0	14-7-14	NOTEST	0	0	0	0	1	1	no
Glyma01g22871	Glyma01g22871	Glyma01g22871	Gm01:29147726-29148607	14-7-0	14-7-14	OK	2.63386	1.26995	-1.05241	0.932112	0.351279	0.680158	no
Glyma01g22880	Glyma01g22880	Glyma01g22880	Gm01:29149880-29152191	14-7-0	14-7-14	OK	0.0592091	1.66957	4.81751	-3.76587	0.000165968	0.00596449	yes
Glyma01g22910	Glyma01g22910	Glyma01g22910	Gm01:29193663-29195557	14-7-0	14-7-14	NOTEST	0	0	0	0	1	1	no
Glyma01g22927	Glyma01g22927	Glyma01g22927	Gm01:29230774-29239997	14-7-0	14-7-14	NOTEST	0	0	0	0	1	1	no
Glyma01g22944	Glyma01g22944	Glyma01g22944	Gm01:29270621-29273823	14-7-0	14-7-14	NOTEST	0	0	0	0	1	1	no
Glyma01g22962	Glyma01g22962	Glyma01g22962	Gm01:29296975-29300243	14-7-0	14-7-14	NOTEST	0	0.0127704	1.79769e+308	1.79769e+308	0.243957	1	no
Glyma01g22980	Glyma01g22980	Glyma01g22980	Gm01:29388012-29389406	14-7-0	14-7-14	NOTEST	0	0	0	0	1	1	no
Glyma01g22990	Glyma01g22990	Glyma01g22990	Gm01:29393119-29399932	14-7-0	14-7-14	NOTEST	0.0284959	0.0746875	1.39011	-0.96216	0.335969	1	no
Glyma01g23015	Glyma01g23015	Glyma01g23015	Gm01:29421939-29425642	14-7-0	14-7-14	OK	1.57702	1.11945	-0.49441	0.340271	0.733652	0.908915	no
Glyma01g23040	Glyma01g23040	Glyma01g23040	Gm01:29470009-29471440	14-7-0	14-7-14	OK	5.47516	6.48352	0.243875	-0.32174	0.747649	0.914057	no
Glyma01g23056	Glyma01g23056	Glyma01g23056	Gm01:29471833-29483149	14-7-0	14-7-14	OK	4.12404	4.17495	0.017702	-0.0230803	0.981586	0.994326	no
Glyma01g23072	Glyma01g23072	Glyma01g23072	Gm01:29511789-29512084	14-7-0	14-7-14	NOTEST	0	0	0	0	1	1	no
Glyma01g23089	Glyma01g23089	Glyma01g23089	Gm01:29533330-29533964	14-7-0	14-7-14	NOTEST	0	0	0	0	1	1	no
Glyma01g23106	Glyma01g23106	Glyma01g23106	Gm01:29535512-29536834	14-7-0	14-7-14	NOTEST	0	0	0	0	1	1	no
Glyma01g23123	Glyma01g23123	Glyma01g23123	Gm01:29537254-29537802	14-7-0	14-7-14	NOTEST	0	0	0	0	1	1	no
Glyma01g23140	Glyma01g23140	Glyma01g23140	Gm01:29565892-29574413	14-7-0	14-7-14	OK	0.20514	0.691762	1.75367	-1.78657	0.0740063	0.298425	no
Glyma01g23150	Glyma01g23150	Glyma01g23150	Gm01:29660957-29665158	14-7-0	14-7-14	OK	6.74595	3.74563	-0.848815	1.18719	0.235153	0.560918	no
Glyma01g23180	Glyma01g23180	Glyma01g23180	Gm01:29699064-29704324	14-7-0	14-7-14	OK	3.04423	2.04794	-0.571904	0.763041	0.445439	0.754624	no
Glyma01g23196	Glyma01g23196	Glyma01g23196	Gm01:29809758-29827788	14-7-0	14-7-14	OK	15.3201	2.17336	-2.81743	2.13099	0.0330899	0.191401	no
Glyma01g23213	Glyma01g23213	Glyma01g23213	Gm01:29809758-29827788	14-7-0	14-7-14	OK	2.35405	4.65395	0.983311	-0.878377	0.379739	0.704103	no
Glyma01g23230	Glyma01g23230	Glyma01g23230	Gm01:29843906-29847664	14-7-0	14-7-14	OK	0.889105	13.0271	3.87302	-4.50588	6.60983e-06	0.000510466	yes
Glyma01g23250	Glyma01g23250	Glyma01g23250	Gm01:29855703-29857266	14-7-0	14-7-14	NOTEST	0	0	0	0	1	1	no
Glyma01g23300	Glyma01g23300	Glyma01g23300	Gm01:29947728-29948872	14-7-0	14-7-14	NOTEST	0	0	0	0	1	1	no
Glyma01g23342	Glyma01g23342	Glyma01g23342	Gm01:29989093-29991297	14-7-0	14-7-14	NOTEST	0	0	0	0	1	1	no
Glyma01g23384	Glyma01g23384	Glyma01g23384	Gm01:30079377-30079787	14-7-0	14-7-14	OK	0.637816	0.259275	-1.29866	0.590689	0.554729	0.821769	no
Glyma01g23427	Glyma01g23427	Glyma01g23427	Gm01:30083471-30150322	14-7-0	14-7-14	OK	2.23261	1.98446	-0.169989	0.226455	0.820847	0.942165	no
Glyma01g23470	Glyma01g23470	Glyma01g23470	Gm01:30208373-30208835	14-7-0	14-7-14	NOTEST	0	0	0	0	1	1	no
Glyma01g23534	Glyma01g23534	Glyma01g23534	Gm01:30275109-30281645	14-7-0	14-7-14	NOTEST	0	0	0	0	1	1	no
Glyma01g23598	Glyma01g23598	Glyma01g23598	Gm01:30314496-30324821	14-7-0	14-7-14	OK	9.02262	7.04232	-0.357494	0.468661	0.639312	0.865065	no
Glyma01g23662	Glyma01g23662	Glyma01g23662	Gm01:30575165-30577235	14-7-0	14-7-14	NOTEST	0	0	0	0	1	1	no
Glyma01g23726	Glyma01g23726	Glyma01g23726	Gm01:30704826-30710568	14-7-0	14-7-14	OK	8.17436	6.53343	-0.323264	0.457943	0.646993	0.869205	no
Glyma01g23790	Glyma01g23790	Glyma01g23790	Gm01:30725259-30734274	14-7-0	14-7-14	NOTEST	0	0	0	0	1	1	no
Glyma01g23820	Glyma01g23820	Glyma01g23820	Gm01:30803138-30810796	14-7-0	14-7-14	OK	1.7438	2.88126	0.72447	-0.734337	0.462744	0.766182	no
Glyma01g23830	Glyma01g23830	Glyma01g23830	Gm01:30834278-30837915	14-7-0	14-7-14	OK	5.07064	6.32749	0.319465	-0.4367	0.662329	0.876609	no
Glyma01g23840	Glyma01g23840	Glyma01g23840	Gm01:30921784-30923363	14-7-0	14-7-14	NOTEST	0	0	0	0	1	1	no
Glyma01g23870	Glyma01g23870	Glyma01g23870	Gm01:31003666-31006666	14-7-0	14-7-14	OK	11.3334	58.7862	2.37489	-2.77685	0.00548884	0.0664328	no
Glyma01g24100	Glyma01g24100	Glyma01g24100	Gm01:31272679-31276347	14-7-0	14-7-14	OK	60.1792	39.7215	-0.599345	0.804492	0.421113	0.736806	no
Glyma01g24115	Glyma01g24115	Glyma01g24115	Gm01:31363012-31365202	14-7-0	14-7-14	NOTEST	0	0.0798217	1.79769e+308	1.79769e+308	0.207108	1	no
Glyma01g24130	Glyma01g24130	Glyma01g24130	Gm01:31382751-31384508	14-7-0	14-7-14	NOTEST	0	0	0	0	1	1	no
Glyma01g24136	Glyma01g24136	Glyma01g24136	Gm01:31384592-31388267	14-7-0	14-7-14	NOTEST	0	0	0	0	1	1	no
Glyma01g24143	Glyma01g24143	Glyma01g24143	Gm01:31403714-31405886	14-7-0	14-7-14	NOTEST	0	0.0707998	1.79769e+308	1.79769e+308	0.141284	1	no
Glyma01g24150	Glyma01g24150	Glyma01g24150	Gm01:31406290-31410211	14-7-0	14-7-14	OK	0.219264	2.77819	3.66341	-3.26689	0.00108737	0.0226211	yes
Glyma01g24160	Glyma01g24160	Glyma01g24160	Gm01:31442860-31443621	14-7-0	14-7-14	NOTEST	0	0.0708614	1.79769e+308	1.79769e+308	0.223676	1	no
Glyma01g24360	Glyma01g24360	Glyma01g24360	Gm01:31583729-31587255	14-7-0	14-7-14	OK	44.2275	24.7268	-0.838871	1.11602	0.264413	0.59471	no
Glyma01g24383	Glyma01g24383	Glyma01g24383	Gm01:31655035-31655556	14-7-0	14-7-14	NOTEST	0	0	0	0	1	1	no
Glyma01g24406	Glyma01g24406	Glyma01g24406	Gm01:31704492-31706592	14-7-0	14-7-14	NOTEST	0	0.452319	1.79769e+308	1.79769e+308	0.0777245	1	no
Glyma01g24430	Glyma01g24430	Glyma01g24430	Gm01:31720084-31726752	14-7-0	14-7-14	OK	3.17593	3.10134	-0.0342879	0.041506	0.966893	0.990207	no
Glyma01g24455	Glyma01g24455	Glyma01g24455	Gm01:31734753-31736467	14-7-0	14-7-14	NOTEST	0.176829	0.100621	-0.813428	0.583868	0.559309	1	no
Glyma01g24480	Glyma01g24480	Glyma01g24480	Gm01:31792540-31792932	14-7-0	14-7-14	OK	9.37058	2.68108	-1.80532	1.71948	0.0855274	0.324554	no
Glyma01g24495	Glyma01g24495	Glyma01g24495	Gm01:31795450-31795885	14-7-0	14-7-14	OK	1.63238	0.408055	-2.00014	1.24031	0.21486	0.536743	no
Glyma01g24510	Glyma01g24510	Glyma01g24510	Gm01:31818673-31828608	14-7-0	14-7-14	OK	1.86935	3.17638	0.76485	-0.972619	0.330743	0.661021	no
Glyma01g24515	Glyma01g24515	Glyma01g24515	Gm01:31889614-31891603	14-7-0	14-7-14	NOTEST	0	0	0	0	1	1	no
Glyma01g24520	Glyma01g24520	Glyma01g24520	Gm01:31911765-31920749	14-7-0	14-7-14	OK	6.80204	3.71273	-0.873486	0.908094	0.363828	0.690059	no
Glyma01g24530	Glyma01g24530	Glyma01g24530	Gm01:31964428-31977723	14-7-0	14-7-14	NOTEST	0.243759	0.0409642	-2.57302	1.39602	0.16271	1	no
Glyma01g24536	Glyma01g24536	Glyma01g24536	Gm01:31981604-31985794	14-7-0	14-7-14	NOTEST	0	0	0	0	1	1	no
Glyma01g24543	Glyma01g24543	Glyma01g24543	Gm01:32028704-32031074	14-7-0	14-7-14	NOTEST	0	0	0	0	1	1	no
Glyma01g24550	Glyma01g24550	Glyma01g24550	Gm01:32033425-32036205	14-7-0	14-7-14	OK	3.27093	4.77155	0.544754	-0.505069	0.61351	0.853468	no
Glyma01g24570	Glyma01g24570	Glyma01g24570	Gm01:32066869-32072424	14-7-0	14-7-14	OK	7.09968	7.52274	0.0835043	-0.109969	0.912434	0.972855	no
Glyma01g24580	Glyma01g24580	Glyma01g24580	Gm01:32077414-32078744	14-7-0	14-7-14	NOTEST	0	0	0	0	1	1	no
Glyma01g24601	Glyma01g24601	Glyma01g24601	Gm01:32084232-32086938	14-7-0	14-7-14	OK	11.9545	7.93362	-0.5915	0.602672	0.546727	0.817017	no
Glyma01g24620	Glyma01g24620	Glyma01g24620	Gm01:32161499-32162094	14-7-0	14-7-14	NOTEST	0	0	0	0	1	1	no
Glyma01g24650	Glyma01g24650	Glyma01g24650	Gm01:32202535-32211787	14-7-0	14-7-14	OK	6.33844	8.78783	0.471378	-0.659992	0.509259	0.79541	no
Glyma01g24670	Glyma01g24670	Glyma01g24670	Gm01:32220914-32223882	14-7-0	14-7-14	OK	0.220871	0.659017	1.57711	-1.50529	0.132249	0.414545	no
Glyma01g24680	Glyma01g24680	Glyma01g24680	Gm01:32231085-32231557	14-7-0	14-7-14	NOTEST	0	0	0	0	1	1	no
Glyma01g24710	Glyma01g24710	Glyma01g24710	Gm01:32287633-32289710	14-7-0	14-7-14	NOTEST	0.0389495	0.126119	1.69511	-1.19238	0.233111	1	no
Glyma01g24715	Glyma01g24715	Glyma01g24715	Gm01:32301822-32302361	14-7-0	14-7-14	NOTEST	0	0	0	0	1	1	no
Glyma01g24720	Glyma01g24720	Glyma01g24720	Gm01:32308210-32311363	14-7-0	14-7-14	NOTEST	0	0	0	0	1	1	no
Glyma01g24735	Glyma01g24735	Glyma01g24735	Gm01:32401120-32402034	14-7-0	14-7-14	NOTEST	0	0	0	0	1	1	no
Glyma01g24750	Glyma01g24750	Glyma01g24750	Gm01:32402350-32403396	14-7-0	14-7-14	NOTEST	0	0	0	0	1	1	no
Glyma01g24771	Glyma01g24771	Glyma01g24771	Gm01:32417415-32418160	14-7-0	14-7-14	NOTEST	0	0	0	0	1	1	no
Glyma01g24790	Glyma01g24790	Glyma01g24790	Gm01:32422309-32422465	14-7-0	14-7-14	NOTEST	0	0	0	0	1	1	no
Glyma01g24801	Glyma01g24801	Glyma01g24801	Gm01:32490914-32491358	14-7-0	14-7-14	NOTEST	0	0	0	0	1	1	no
Glyma01g24811	Glyma01g24811	Glyma01g24811	Gm01:32561178-32561613	14-7-0	14-7-14	NOTEST	0	0	0	0	1	1	no
Glyma01g24820	Glyma01g24820	Glyma01g24820	Gm01:32606517-32608233	14-7-0	14-7-14	NOTEST	0	0	0	0	1	1	no
Glyma01g24835	Glyma01g24835	Glyma01g24835	Gm01:32612017-32613710	14-7-0	14-7-14	NOTEST	0	0	0	0	1	1	no
Glyma01g24850	Glyma01g24850	Glyma01g24850	Gm01:32687318-32692418	14-7-0	14-7-14	NOTEST	0	0	0	0	1	1	no
Glyma01g24870	Glyma01g24870	Glyma01g24870	Gm01:32782513-32787123	14-7-0	14-7-14	NOTEST	0	0.157601	1.79769e+308	1.79769e+308	0.052544	1	no
Glyma01g24880	Glyma01g24880	Glyma01g24880	Gm01:32798562-32800071	14-7-0	14-7-14	OK	5.58943	0.705435	-2.98612	3.12706	0.00176565	0.0316741	yes
Glyma01g24900	Glyma01g24900	Glyma01g24900	Gm01:32814004-32817943	14-7-0	14-7-14	OK	6.42617	6.81518	0.0847913	-0.111126	0.911516	0.972855	no
Glyma01g24915	Glyma01g24915	Glyma01g24915	Gm01:32834808-32836555	14-7-0	14-7-14	NOTEST	0	0.0811663	1.79769e+308	1.79769e+308	0.141284	1	no
Glyma01g24931	Glyma01g24931	Glyma01g24931	Gm01:32867175-32870537	14-7-0	14-7-14	OK	39.4176	33.6458	-0.228414	0.300637	0.763691	0.921761	no
Glyma01g24945	Glyma01g24945	Glyma01g24945	Gm01:32870727-32871773	14-7-0	14-7-14	OK	27.9392	14.1148	-0.98508	1.38091	0.167306	0.471713	no
Glyma01g24960	Glyma01g24960	Glyma01g24960	Gm01:32900893-32902163	14-7-0	14-7-14	NOTEST	0	0	0	0	1	1	no
Glyma01g24975	Glyma01g24975	Glyma01g24975	Gm01:33011689-33012355	14-7-0	14-7-14	NOTEST	0	0	0	0	1	1	no
Glyma01g24990	Glyma01g24990	Glyma01g24990	Gm01:33023697-33026836	14-7-0	14-7-14	NOTEST	0	0	0	0	1	1	no
Glyma01g25000	Glyma01g25000	Glyma01g25000	Gm01:33038313-33043683	14-7-0	14-7-14	NOTEST	0	0	0	0	1	1	no
Glyma01g25010	Glyma01g25010	Glyma01g25010	Gm01:33122056-33128090	14-7-0	14-7-14	OK	1.49962	1.53975	0.0381006	-0.0405169	0.967681	0.990549	no
Glyma01g25040	Glyma01g25040	Glyma01g25040	Gm01:33159095-33163007	14-7-0	14-7-14	OK	4.90894	5.99464	0.288263	-0.399905	0.689227	0.888723	no
Glyma01g25116	Glyma01g25116	Glyma01g25116	Gm01:33175920-33176216	14-7-0	14-7-14	NOTEST	0	0	0	0	1	1	no
Glyma01g25193	Glyma01g25193	Glyma01g25193	Gm01:33176938-33177664	14-7-0	14-7-14	NOTEST	0	0	0	0	1	1	no
Glyma01g25270	Glyma01g25270	Glyma01g25270	Gm01:33300641-33305517	14-7-0	14-7-14	OK	8.70846	8.10086	-0.104343	0.133245	0.894	0.96771	no
Glyma01g25690	Glyma01g25690	Glyma01g25690	Gm01:33714521-33724227	14-7-0	14-7-14	OK	6.53666	4.12126	-0.665469	0.928811	0.352987	0.681328	no
Glyma01g25710	Glyma01g25710	Glyma01g25710	Gm01:33743092-33750073	14-7-0	14-7-14	OK	0.647266	2.08416	1.68703	-1.89638	0.0579094	0.259487	no
Glyma01g25734	Glyma01g25734	Glyma01g25734	Gm01:33873561-33877219	14-7-0	14-7-14	NOTEST	0	0	0	0	1	1	no
Glyma01g25758	Glyma01g25758	Glyma01g25758	Gm01:33877681-33878910	14-7-0	14-7-14	NOTEST	0	0	0	0	1	1	no
Glyma01g25782	Glyma01g25782	Glyma01g25782	Gm01:33892028-33896774	14-7-0	14-7-14	NOTEST	0.0288734	0.106409	1.8818	-1.07163	0.283884	1	no
Glyma01g25806	Glyma01g25806	Glyma01g25806	Gm01:33911123-33912252	14-7-0	14-7-14	NOTEST	0	0	0	0	1	1	no
Glyma01g25830	Glyma01g25830	Glyma01g25830	Gm01:33967102-33969353	14-7-0	14-7-14	OK	20.8649	49.5461	1.24769	-1.54068	0.123396	0.398851	no
Glyma01g25861	Glyma01g25861	Glyma01g25861	Gm01:33970039-33970770	14-7-0	14-7-14	NOTEST	0	0	0	0	1	1	no
Glyma01g25890	Glyma01g25890	Glyma01g25890	Gm01:34032831-34039400	14-7-0	14-7-14	OK	9.98953	4.97668	-1.00523	1.40481	0.160077	0.460599	no
Glyma01g25903	Glyma01g25903	Glyma01g25903	Gm01:34110636-34112307	14-7-0	14-7-14	NOTEST	0	0.0853659	1.79769e+308	1.79769e+308	0.223676	1	no
Glyma01g25916	Glyma01g25916	Glyma01g25916	Gm01:34210140-34210872	14-7-0	14-7-14	NOTEST	0	0.058842	1.79769e+308	1.79769e+308	0.223676	1	no
Glyma01g25930	Glyma01g25930	Glyma01g25930	Gm01:34244964-34245805	14-7-0	14-7-14	OK	0.380766	1.60425	2.07492	-1.68342	0.092293	0.339016	no
Glyma01g25940	Glyma01g25940	Glyma01g25940	Gm01:34287073-34295334	14-7-0	14-7-14	OK	40.5252	17.888	-1.17983	1.4701	0.141534	0.430286	no
Glyma01g25960	Glyma01g25960	Glyma01g25960	Gm01:34329634-34332496	14-7-0	14-7-14	OK	0	0.72753	1.79769e+308	1.79769e+308	0.143655	0.434232	no
Glyma01g25980	Glyma01g25980	Glyma01g25980	Gm01:34344570-34345856	14-7-0	14-7-14	NOTEST	0	0	0	0	1	1	no
Glyma01g26010	Glyma01g26010	Glyma01g26010	Gm01:34353206-34357427	14-7-0	14-7-14	NOTEST	0	0	0	0	1	1	no
Glyma01g26220	Glyma01g26220	Glyma01g26220	Gm01:34484074-34486309	14-7-0	14-7-14	OK	0.869929	6.88988	2.98551	-3.29047	0.0010002	0.0213509	yes
Glyma01g26230	Glyma01g26230	Glyma01g26230	Gm01:34508385-34510490	14-7-0	14-7-14	OK	5.3777	89.1184	4.05066	-5.06181	4.15292e-07	6.22995e-05	yes
Glyma01g26300	Glyma01g26300	Glyma01g26300	Gm01:34545482-34547230	14-7-0	14-7-14	OK	2.66806	4.67185	0.808202	-0.910725	0.36244	0.688677	no
Glyma01g26310	Glyma01g26310	Glyma01g26310	Gm01:34591834-34592752	14-7-0	14-7-14	NOTEST	0	0	0	0	1	1	no
Glyma01g26325	Glyma01g26325	Glyma01g26325	Gm01:34678298-34679472	14-7-0	14-7-14	NOTEST	0	0	0	0	1	1	no
Glyma01g26340	Glyma01g26340	Glyma01g26340	Gm01:34729733-34732217	14-7-0	14-7-14	NOTEST	0	0.17941	1.79769e+308	1.79769e+308	0.047229	1	no
Glyma01g26350	Glyma01g26350	Glyma01g26350	Gm01:34828578-34838846	14-7-0	14-7-14	OK	3.60807	4.3522	0.270518	-0.380379	0.703664	0.895591	no
Glyma01g26360	Glyma01g26360	Glyma01g26360	Gm01:34923320-34923989	14-7-0	14-7-14	OK	3.95131	22.1464	2.48667	-2.87915	0.00398751	0.0544405	no
Glyma01g26570	Glyma01g26570	Glyma01g26570	Gm01:35047812-35050350	14-7-0	14-7-14	NOTEST	0	0.0609444	1.79769e+308	1.79769e+308	0.141284	1	no
Glyma01g26580	Glyma01g26580	Glyma01g26580	Gm01:35128362-35132942	14-7-0	14-7-14	NOTEST	0	0.0754887	1.79769e+308	1.79769e+308	0.141284	1	no
Glyma01g26590	Glyma01g26590	Glyma01g26590	Gm01:35185581-35190582	14-7-0	14-7-14	NOTEST	0.0445547	0.256005	2.52252	-2.07041	0.038414	1	no
Glyma01g26600	Glyma01g26600	Glyma01g26600	Gm01:35191726-35193878	14-7-0	14-7-14	OK	4.36769	4.38324	0.00512718	-0.00596879	0.995238	0.998688	no
Glyma01g26606	Glyma01g26606	Glyma01g26606	Gm01:35221753-35222332	14-7-0	14-7-14	NOTEST	0	0	0	0	1	1	no
Glyma01g26613	Glyma01g26613	Glyma01g26613	Gm01:35260947-35261763	14-7-0	14-7-14	NOTEST	0	0	0	0	1	1	no
Glyma01g26620	Glyma01g26620	Glyma01g26620	Gm01:35271480-35272153	14-7-0	14-7-14	NOTEST	0	0	0	0	1	1	no
Glyma01g26650	Glyma01g26650	Glyma01g26650	Gm01:35317654-35328670	14-7-0	14-7-14	OK	2.16231	2.45991	0.18603	-0.217477	0.827837	0.945478	no
Glyma01g26670	Glyma01g26670	Glyma01g26670	Gm01:35431736-35435954	14-7-0	14-7-14	NOTEST	0.332512	0	-1.79769e+308	-1.79769e+308	0.0404649	1	no
Glyma01g26681	Glyma01g26681	Glyma01g26681	Gm01:35464370-35465052	14-7-0	14-7-14	NOTEST	0	0	0	0	1	1	no
Glyma01g26690	Glyma01g26690	Glyma01g26690	Gm01:35468032-35472931	14-7-0	14-7-14	OK	0.597934	0.541738	-0.142392	0.127511	0.898536	0.969376	no
Glyma01g26700	Glyma01g26700	Glyma01g26700	Gm01:35501543-35506434	14-7-0	14-7-14	OK	1.48134	1.97597	0.415664	-0.468227	0.639623	0.865185	no
Glyma01g26750	Glyma01g26750	Glyma01g26750	Gm01:35572394-35581615	14-7-0	14-7-14	NOTEST	0.104557	0.0350611	-1.57635	0.768282	0.44232	1	no
Glyma01g26766	Glyma01g26766	Glyma01g26766	Gm01:35587717-35588464	14-7-0	14-7-14	NOTEST	0	0	0	0	1	1	no
Glyma01g26783	Glyma01g26783	Glyma01g26783	Gm01:35595556-35596652	14-7-0	14-7-14	NOTEST	0	0	0	0	1	1	no
Glyma01g26800	Glyma01g26800	Glyma01g26800	Gm01:35606472-35610217	14-7-0	14-7-14	NOTEST	0	0	0	0	1	1	no
Glyma01g26813	Glyma01g26813	Glyma01g26813	Gm01:35625153-35625890	14-7-0	14-7-14	NOTEST	0	0	0	0	1	1	no
Glyma01g26826	Glyma01g26826	Glyma01g26826	Gm01:35632686-35633208	14-7-0	14-7-14	NOTEST	0	0	0	0	1	1	no
Glyma01g26840	Glyma01g26840	Glyma01g26840	Gm01:35643767-35646603	14-7-0	14-7-14	OK	3.72758	13.9735	1.90639	-2.44227	0.0145952	0.120764	no
Glyma01g26860	Glyma01g26860	Glyma01g26860	Gm01:35688241-35692239	14-7-0	14-7-14	NOTEST	0	0	0	0	1	1	no
Glyma01g26900	Glyma01g26900	Glyma01g26900	Gm01:35719443-35723183	14-7-0	14-7-14	NOTEST	0	0	0	0	1	1	no
Glyma01g26915	Glyma01g26915	Glyma01g26915	Gm01:35827768-35828303	14-7-0	14-7-14	NOTEST	0	0	0	0	1	1	no
Glyma01g26930	Glyma01g26930	Glyma01g26930	Gm01:35832934-35837033	14-7-0	14-7-14	OK	39.2404	15.572	-1.33338	1.52651	0.126883	0.405102	no
Glyma01g26940	Glyma01g26940	Glyma01g26940	Gm01:35863797-35865409	14-7-0	14-7-14	OK	0.940204	4.9387	2.39309	-2.65443	0.00794418	0.0834256	no
Glyma01g26950	Glyma01g26950	Glyma01g26950	Gm01:35866292-35869400	14-7-0	14-7-14	OK	33.2764	32.95	-0.0142198	0.0180925	0.985565	0.995698	no
Glyma01g26961	Glyma01g26961	Glyma01g26961	Gm01:35952581-35954091	14-7-0	14-7-14	NOTEST	0	0	0	0	1	1	no
Glyma01g26970	Glyma01g26970	Glyma01g26970	Gm01:35963018-35964248	14-7-0	14-7-14	OK	64.7664	24.1549	-1.42293	1.8632	0.0624339	0.270994	no
Glyma01g26981	Glyma01g26981	Glyma01g26981	Gm01:35964318-35966630	14-7-0	14-7-14	OK	4.46711	2.09369	-1.09329	0.857674	0.391073	0.714111	no
Glyma01g26990	Glyma01g26990	Glyma01g26990	Gm01:35968043-35972769	14-7-0	14-7-14	OK	7.03161	5.19039	-0.438014	0.620325	0.535044	0.810306	no
Glyma01g27005	Glyma01g27005	Glyma01g27005	Gm01:35977333-35983210	14-7-0	14-7-14	OK	4.65699	1.97352	-1.23862	1.67092	0.0947368	0.34397	no
Glyma01g27020	Glyma01g27020	Glyma01g27020	Gm01:36004326-36005428	14-7-0	14-7-14	NOTEST	0.0392459	0.0437422	0.156483	-0.0579538	0.953785	1	no
Glyma01g27040	Glyma01g27040	Glyma01g27040	Gm01:36021672-36025699	14-7-0	14-7-14	OK	0.121009	1.07871	3.15612	-2.82812	0.00468222	0.0601401	no
Glyma01g27060	Glyma01g27060	Glyma01g27060	Gm01:36063450-36065354	14-7-0	14-7-14	OK	1.03303	7.43128	2.84673	-3.27766	0.00104671	0.0220132	yes
Glyma01g27110	Glyma01g27110	Glyma01g27110	Gm01:36127733-36131641	14-7-0	14-7-14	NOTEST	0	0	0	0	1	1	no
Glyma01g27120	Glyma01g27120	Glyma01g27120	Gm01:36147154-36151735	14-7-0	14-7-14	OK	4.98582	2.89095	-0.786286	0.918442	0.358388	0.685321	no
Glyma01g27130	Glyma01g27130	Glyma01g27130	Gm01:36161870-36165133	14-7-0	14-7-14	OK	0.595353	0.402782	-0.563747	0.501211	0.616223	0.854751	no
Glyma01g27145	Glyma01g27145	Glyma01g27145	Gm01:36192774-36194659	14-7-0	14-7-14	NOTEST	0	0	0	0	1	1	no
Glyma01g27160	Glyma01g27160	Glyma01g27160	Gm01:36195997-36196273	14-7-0	14-7-14	NOTEST	0	0	0	0	1	1	no
Glyma01g27170	Glyma01g27170	Glyma01g27170	Gm01:36211478-36213198	14-7-0	14-7-14	OK	3.33611	1.27736	-1.385	1.19236	0.233121	0.557986	no
Glyma01g27200	Glyma01g27200	Glyma01g27200	Gm01:36246044-36251145	14-7-0	14-7-14	OK	11.3455	6.38139	-0.830172	1.1665	0.243411	0.570997	no
Glyma01g27215	Glyma01g27215	Glyma01g27215	Gm01:36263859-36271059	14-7-0	14-7-14	OK	1.229	0.253345	-2.27831	1.43178	0.152206	0.448231	no
Glyma01g27230	Glyma01g27230	Glyma01g27230	Gm01:36326563-36327062	14-7-0	14-7-14	NOTEST	0	0	0	0	1	1	no
Glyma01g27240	Glyma01g27240	Glyma01g27240	Gm01:36332421-36351694	14-7-0	14-7-14	OK	6.40368	6.44355	0.00895449	-0.0122067	0.990261	0.997201	no
Glyma01g27250	Glyma01g27250	Glyma01g27250	Gm01:36369066-36382267	14-7-0	14-7-14	OK	7.4745	7.12819	-0.0684412	0.096516	0.923111	0.976769	no
Glyma01g27260	Glyma01g27260	Glyma01g27260	Gm01:36388728-36391729	14-7-0	14-7-14	NOTEST	0	0	0	0	1	1	no
Glyma01g27280	Glyma01g27280	Glyma01g27280	Gm01:36438459-36440199	14-7-0	14-7-14	OK	0.355519	1.73962	2.29077	-2.18386	0.0289729	0.179228	no
Glyma01g27291	Glyma01g27291	Glyma01g27291	Gm01:36450899-36454001	14-7-0	14-7-14	NOTEST	0.279808	0.154596	-0.855935	0.400284	0.688948	1	no
Glyma01g27301	Glyma01g27301	Glyma01g27301	Gm01:36450899-36454001	14-7-0	14-7-14	NOTEST	0	0	0	0	1	1	no
Glyma01g27310	Glyma01g27310	Glyma01g27310	Gm01:36464465-36465566	14-7-0	14-7-14	NOTEST	0	0	0	0	1	1	no
Glyma01g27360	Glyma01g27360	Glyma01g27360	Gm01:36545021-36547291	14-7-0	14-7-14	NOTEST	0	0.267963	1.79769e+308	1.79769e+308	0.031163	1	no
Glyma01g27385	Glyma01g27385	Glyma01g27385	Gm01:36610052-36610460	14-7-0	14-7-14	NOTEST	0	0	0	0	1	1	no
Glyma01g27410	Glyma01g27410	Glyma01g27410	Gm01:36654803-36655111	14-7-0	14-7-14	NOTEST	0	0	0	0	1	1	no
Glyma01g27440	Glyma01g27440	Glyma01g27440	Gm01:36685735-36695527	14-7-0	14-7-14	NOTEST	0.0461666	0.0907215	0.974595	-0.609092	0.542464	1	no
Glyma01g27455	Glyma01g27455	Glyma01g27455	Gm01:36705021-36712560	14-7-0	14-7-14	NOTEST	0.166332	0.383481	1.20509	-1.14234	0.253313	1	no
Glyma01g27470	Glyma01g27470	Glyma01g27470	Gm01:36735448-36737186	14-7-0	14-7-14	NOTEST	0	0	0	0	1	1	no
Glyma01g27490	Glyma01g27490	Glyma01g27490	Gm01:36794254-36798874	14-7-0	14-7-14	NOTEST	0.094505	0.158858	0.749275	-0.508434	0.611149	1	no
Glyma01g27710	Glyma01g27710	Glyma01g27710	Gm01:36987889-36992462	14-7-0	14-7-14	OK	1.12848	9.7176	3.10622	-3.82491	0.000130822	0.00509318	yes
Glyma01g27720	Glyma01g27720	Glyma01g27720	Gm01:37036140-37038376	14-7-0	14-7-14	OK	0.599215	0.551066	-0.120849	0.110926	0.911675	0.972855	no
Glyma01g27765	Glyma01g27765	Glyma01g27765	Gm01:37212445-37213145	14-7-0	14-7-14	NOTEST	0	0	0	0	1	1	no
Glyma01g27810	Glyma01g27810	Glyma01g27810	Gm01:37231576-37233997	14-7-0	14-7-14	OK	3.89304	4.78028	0.296199	-0.412154	0.680226	0.885567	no
Glyma01g27840	Glyma01g27840	Glyma01g27840	Gm01:37299487-37305059	14-7-0	14-7-14	OK	13.098	23.1936	0.824383	-1.12059	0.262462	0.592687	no
Glyma01g27860	Glyma01g27860	Glyma01g27860	Gm01:37321469-37321784	14-7-0	14-7-14	NOTEST	0	0	0	0	1	1	no
Glyma01g27890	Glyma01g27890	Glyma01g27890	Gm01:37336991-37338203	14-7-0	14-7-14	OK	0	1.78791	1.79769e+308	1.79769e+308	0.0218325	0.154129	no
Glyma01g27900	Glyma01g27900	Glyma01g27900	Gm01:37379998-37383931	14-7-0	14-7-14	OK	5.94541	36.4025	2.61419	-3.4347	0.000593203	0.0148655	yes
Glyma01g27910	Glyma01g27910	Glyma01g27910	Gm01:37406845-37408224	14-7-0	14-7-14	NOTEST	0	0	0	0	1	1	no
Glyma01g27941	Glyma01g27941	Glyma01g27941	Gm01:37433263-37434146	14-7-0	14-7-14	NOTEST	0	0	0	0	1	1	no
Glyma01g27970	Glyma01g27970	Glyma01g27970	Gm01:37457417-37460795	14-7-0	14-7-14	NOTEST	0	0.0971353	1.79769e+308	1.79769e+308	0.0940746	1	no
Glyma01g28026	Glyma01g28026	Glyma01g28026	Gm01:37580338-37581229	14-7-0	14-7-14	NOTEST	0	0	0	0	1	1	no
Glyma01g28082	Glyma01g28082	Glyma01g28082	Gm01:37587054-37587942	14-7-0	14-7-14	NOTEST	0	0	0	0	1	1	no
Glyma01g28139	Glyma01g28139	Glyma01g28139	Gm01:37594369-37595242	14-7-0	14-7-14	NOTEST	0	0	0	0	1	1	no
Glyma01g28196	Glyma01g28196	Glyma01g28196	Gm01:37611247-37612183	14-7-0	14-7-14	NOTEST	0	0	0	0	1	1	no
Glyma01g28253	Glyma01g28253	Glyma01g28253	Gm01:37911350-37912244	14-7-0	14-7-14	NOTEST	0	0	0	0	1	1	no
Glyma01g28310	Glyma01g28310	Glyma01g28310	Gm01:37913283-37917411	14-7-0	14-7-14	OK	0.675901	6.57085	3.2812	-3.33529	0.000852091	0.0191533	yes
Glyma01g28353	Glyma01g28353	Glyma01g28353	Gm01:38060909-38061301	14-7-0	14-7-14	NOTEST	0	0	0	0	1	1	no
Glyma01g28396	Glyma01g28396	Glyma01g28396	Gm01:38199627-38200321	14-7-0	14-7-14	OK	385.045	75.7415	-2.34587	2.91797	0.0035232	0.0500518	no
Glyma01g28440	Glyma01g28440	Glyma01g28440	Gm01:38205261-38207629	14-7-0	14-7-14	OK	0.119289	2.35648	4.3041	-4.07079	4.68548e-05	0.00236831	yes
Glyma01g28460	Glyma01g28460	Glyma01g28460	Gm01:38222786-38224222	14-7-0	14-7-14	NOTEST	0	0	0	0	1	1	no
Glyma01g28480	Glyma01g28480	Glyma01g28480	Gm01:38248791-38250401	14-7-0	14-7-14	NOTEST	0	0	0	0	1	1	no
Glyma01g28491	Glyma01g28491	Glyma01g28491	Gm01:38259681-38270227	14-7-0	14-7-14	NOTEST	0	0	0	0	1	1	no
Glyma01g28500	Glyma01g28500	Glyma01g28500	Gm01:38308110-38309077	14-7-0	14-7-14	OK	86.6222	39.6183	-1.12857	1.54572	0.122173	0.396726	no
Glyma01g28511	Glyma01g28511	Glyma01g28511	Gm01:38309608-38311167	14-7-0	14-7-14	NOTEST	0.0640369	0	-1.79769e+308	-1.79769e+308	0.0965277	1	no
Glyma01g28520	Glyma01g28520	Glyma01g28520	Gm01:38386523-38391051	14-7-0	14-7-14	OK	5.98909	1.84964	-1.69509	1.75079	0.0799824	0.311909	no
Glyma01g28550	Glyma01g28550	Glyma01g28550	Gm01:38422858-38424428	14-7-0	14-7-14	NOTEST	0	0	0	0	1	1	no
Glyma01g28626	Glyma01g28626	Glyma01g28626	Gm01:38529390-38530425	14-7-0	14-7-14	NOTEST	0	0	0	0	1	1	no
Glyma01g28703	Glyma01g28703	Glyma01g28703	Gm01:38575000-38577422	14-7-0	14-7-14	OK	0.0853775	9.09468	6.73502	-4.09644	4.19551e-05	0.00217098	yes
Glyma01g28780	Glyma01g28780	Glyma01g28780	Gm01:38596171-38598279	14-7-0	14-7-14	NOTEST	0.0901467	0.318953	1.823	-1.46717	0.142329	1	no
Glyma01g28800	Glyma01g28800	Glyma01g28800	Gm01:38660680-38662575	14-7-0	14-7-14	NOTEST	0	0.0179992	1.79769e+308	1.79769e+308	0.223676	1	no
Glyma01g28805	Glyma01g28805	Glyma01g28805	Gm01:38690273-38690984	14-7-0	14-7-14	NOTEST	0	0	0	0	1	1	no
Glyma01g28810	Glyma01g28810	Glyma01g28810	Gm01:38692764-38695649	14-7-0	14-7-14	OK	1533.87	527.341	-1.54037	0.899794	0.36823	0.694236	no
Glyma01g28820	Glyma01g28820	Glyma01g28820	Gm01:38703774-38707276	14-7-0	14-7-14	OK	48.9454	44.0863	-0.150842	0.15593	0.876088	0.962596	no
Glyma01g28830	Glyma01g28830	Glyma01g28830	Gm01:38709310-38713735	14-7-0	14-7-14	OK	24.0402	14.1753	-0.762071	1.04987	0.293778	0.625321	no
Glyma01g28841	Glyma01g28841	Glyma01g28841	Gm01:38749817-38751606	14-7-0	14-7-14	NOTEST	0	0	0	0	1	1	no
Glyma01g28850	Glyma01g28850	Glyma01g28850	Gm01:38758937-38772979	14-7-0	14-7-14	NOTEST	0	0.079505	1.79769e+308	1.79769e+308	0.0777245	1	no
Glyma01g28865	Glyma01g28865	Glyma01g28865	Gm01:38774846-38778332	14-7-0	14-7-14	NOTEST	0.0673997	0	-1.79769e+308	-1.79769e+308	0.0965277	1	no
Glyma01g28880	Glyma01g28880	Glyma01g28880	Gm01:38811474-38819368	14-7-0	14-7-14	NOTEST	0	0	0	0	1	1	no
Glyma01g28890	Glyma01g28890	Glyma01g28890	Gm01:38825959-38830479	14-7-0	14-7-14	NOTEST	0	0	0	0	1	1	no
Glyma01g28936	Glyma01g28936	Glyma01g28936	Gm01:38986023-38989868	14-7-0	14-7-14	OK	1.71298	0.0627856	-4.76993	4.33294	1.47132e-05	0.00098802	yes
Glyma01g28983	Glyma01g28983	Glyma01g28983	Gm01:39101552-39101978	14-7-0	14-7-14	NOTEST	0	0	0	0	1	1	no
Glyma01g29030	Glyma01g29030	Glyma01g29030	Gm01:39117816-39121119	14-7-0	14-7-14	NOTEST	0.0689428	0.207292	1.58819	-1.26839	0.204657	1	no
Glyma01g29070	Glyma01g29070	Glyma01g29070	Gm01:39200746-39201279	14-7-0	14-7-14	NOTEST	0	0	0	0	1	1	no
Glyma01g29091	Glyma01g29091	Glyma01g29091	Gm01:39202322-39203074	14-7-0	14-7-14	NOTEST	0	0	0	0	1	1	no
Glyma01g29110	Glyma01g29110	Glyma01g29110	Gm01:39206637-39207905	14-7-0	14-7-14	NOTEST	0	0	0	0	1	1	no
Glyma01g29131	Glyma01g29131	Glyma01g29131	Gm01:39211228-39211501	14-7-0	14-7-14	NOTEST	0	0	0	0	1	1	no
Glyma01g29150	Glyma01g29150	Glyma01g29150	Gm01:39249319-39254445	14-7-0	14-7-14	OK	1.52078	2.41236	0.665631	-0.837476	0.402325	0.723124	no
Glyma01g29171	Glyma01g29171	Glyma01g29171	Gm01:39255360-39265417	14-7-0	14-7-14	OK	0.328611	3.23166	3.29782	-2.73307	0.00627467	0.0723301	no
Glyma01g29190	Glyma01g29190	Glyma01g29190	Gm01:39285279-39288819	14-7-0	14-7-14	NOTEST	0	0	0	0	1	1	no
Glyma01g29220	Glyma01g29220	Glyma01g29220	Gm01:39316166-39317298	14-7-0	14-7-14	NOTEST	0	0	0	0	1	1	no
Glyma01g29230	Glyma01g29230	Glyma01g29230	Gm01:39317900-39318629	14-7-0	14-7-14	NOTEST	0	0	0	0	1	1	no
Glyma01g29255	Glyma01g29255	Glyma01g29255	Gm01:39318953-39319509	14-7-0	14-7-14	NOTEST	0	0	0	0	1	1	no
Glyma01g29280	Glyma01g29280	Glyma01g29280	Gm01:39350672-39358098	14-7-0	14-7-14	OK	2.81056	2.91509	0.052683	-0.0633696	0.949472	0.985466	no
Glyma01g29305	Glyma01g29305	Glyma01g29305	Gm01:39376341-39388072	14-7-0	14-7-14	OK	0.670788	6.9759	3.37845	-3.52347	0.000425935	0.0117349	yes
Glyma01g29330	Glyma01g29330	Glyma01g29330	Gm01:39403861-39412277	14-7-0	14-7-14	OK	3.19835	11.1122	1.79674	-2.46737	0.0136109	0.116227	no
Glyma01g29346	Glyma01g29346	Glyma01g29346	Gm01:39421332-39429591	14-7-0	14-7-14	OK	1.06427	5.38221	2.33833	-2.50584	0.0122161	0.108531	no
Glyma01g29362	Glyma01g29362	Glyma01g29362	Gm01:39443729-39458833	14-7-0	14-7-14	OK	6.95549	7.07461	0.0244974	-0.034682	0.972333	0.992199	no
Glyma01g29378	Glyma01g29378	Glyma01g29378	Gm01:39478263-39516299	14-7-0	14-7-14	OK	2.59138	4.54074	0.809204	-1.12485	0.260652	0.591118	no
Glyma01g29394	Glyma01g29394	Glyma01g29394	Gm01:39526777-39530894	14-7-0	14-7-14	NOTEST	0	0	0	0	1	1	no
Glyma01g29410	Glyma01g29410	Glyma01g29410	Gm01:39591646-39594997	14-7-0	14-7-14	OK	1.05939	1.30281	0.298388	-0.301501	0.763032	0.921403	no
Glyma01g29420	Glyma01g29420	Glyma01g29420	Gm01:39597740-39602942	14-7-0	14-7-14	OK	24.4854	7.17346	-1.77118	2.42836	0.0151673	0.123818	no
Glyma01g29440	Glyma01g29440	Glyma01g29440	Gm01:39655886-39656000	14-7-0	14-7-14	NOTEST	0	0	0	0	1	1	no
Glyma01g29470	Glyma01g29470	Glyma01g29470	Gm01:39787035-39797571	14-7-0	14-7-14	OK	5.45362	2.66146	-1.03499	1.3555	0.175259	0.483956	no
Glyma01g29480	Glyma01g29480	Glyma01g29480	Gm01:39799515-39801235	14-7-0	14-7-14	NOTEST	0	0	0	0	1	1	no
Glyma01g29495	Glyma01g29495	Glyma01g29495	Gm01:39818462-39819244	14-7-0	14-7-14	NOTEST	0	0.210324	1.79769e+308	1.79769e+308	0.141284	1	no
Glyma01g29511	Glyma01g29511	Glyma01g29511	Gm01:39824538-39825839	14-7-0	14-7-14	NOTEST	0	0	0	0	1	1	no
Glyma01g29525	Glyma01g29525	Glyma01g29525	Gm01:39837032-39837374	14-7-0	14-7-14	NOTEST	0	0	0	0	1	1	no
Glyma01g29540	Glyma01g29540	Glyma01g29540	Gm01:39848379-39851083	14-7-0	14-7-14	OK	28.3168	16.0147	-0.822262	1.14167	0.253592	0.582799	no
Glyma01g29570	Glyma01g29570	Glyma01g29570	Gm01:39879227-39883100	14-7-0	14-7-14	NOTEST	0	0.0381622	1.79769e+308	1.79769e+308	0.0791744	1	no
Glyma01g29580	Glyma01g29580	Glyma01g29580	Gm01:39898856-39902291	14-7-0	14-7-14	NOTEST	0	0.00380263	1.79769e+308	1.79769e+308	0.330443	1	no
Glyma01g29600	Glyma01g29600	Glyma01g29600	Gm01:39918097-39921140	14-7-0	14-7-14	NOTEST	0	0	0	0	1	1	no
Glyma01g29615	Glyma01g29615	Glyma01g29615	Gm01:39935345-39939812	14-7-0	14-7-14	NOTEST	0	0.0738609	1.79769e+308	1.79769e+308	0.0577226	1	no
Glyma01g29630	Glyma01g29630	Glyma01g29630	Gm01:39945735-39949387	14-7-0	14-7-14	OK	27.3261	23.7594	-0.20178	0.236385	0.813134	0.939646	no
Glyma01g29643	Glyma01g29643	Glyma01g29643	Gm01:39958765-39959672	14-7-0	14-7-14	NOTEST	0	0	0	0	1	1	no
Glyma01g29656	Glyma01g29656	Glyma01g29656	Gm01:39965927-39966511	14-7-0	14-7-14	NOTEST	0	0	0	0	1	1	no
Glyma01g29670	Glyma01g29670	Glyma01g29670	Gm01:39988960-39991138	14-7-0	14-7-14	OK	0	1.31094	1.79769e+308	1.79769e+308	0.0170954	0.132925	no
Glyma01g29715	Glyma01g29715	Glyma01g29715	Gm01:40029815-40030406	14-7-0	14-7-14	NOTEST	0	0.14465	1.79769e+308	1.79769e+308	0.223676	1	no
Glyma01g29760	Glyma01g29760	Glyma01g29760	Gm01:40077200-40079998	14-7-0	14-7-14	OK	0	0.7485	1.79769e+308	1.79769e+308	0.0704196	0.288877	no
Glyma01g29816	Glyma01g29816	Glyma01g29816	Gm01:40154962-40155672	14-7-0	14-7-14	NOTEST	0.087016	0	-1.79769e+308	-1.79769e+308	0.226183	1	no
Glyma01g29873	Glyma01g29873	Glyma01g29873	Gm01:40234344-40236298	14-7-0	14-7-14	NOTEST	0	0.00555643	1.79769e+308	1.79769e+308	0.330443	1	no
Glyma01g29930	Glyma01g29930	Glyma01g29930	Gm01:40499102-40503250	14-7-0	14-7-14	OK	3.04487	9.50481	1.64228	-1.96097	0.049883	0.238282	no
Glyma01g29950	Glyma01g29950	Glyma01g29950	Gm01:40560867-40564466	14-7-0	14-7-14	OK	6.67398	14.3305	1.10247	-1.54314	0.122798	0.398026	no
Glyma01g29970	Glyma01g29970	Glyma01g29970	Gm01:40574051-40575558	14-7-0	14-7-14	NOTEST	0	0	0	0	1	1	no
Glyma01g30000	Glyma01g30000	Glyma01g30000	Gm01:40668497-40669995	14-7-0	14-7-14	NOTEST	0	0	0	0	1	1	no
Glyma01g30010	Glyma01g30010	Glyma01g30010	Gm01:40681967-40683465	14-7-0	14-7-14	NOTEST	0	0	0	0	1	1	no
Glyma01g30020	Glyma01g30020	Glyma01g30020	Gm01:40733504-40735002	14-7-0	14-7-14	NOTEST	0	0	0	0	1	1	no
Glyma01g30030	Glyma01g30030	Glyma01g30030	Gm01:40745198-40746696	14-7-0	14-7-14	NOTEST	0	0	0	0	1	1	no
Glyma01g30040	Glyma01g30040	Glyma01g30040	Gm01:40756924-40758421	14-7-0	14-7-14	NOTEST	0	0	0	0	1	1	no
Glyma01g30060	Glyma01g30060	Glyma01g30060	Gm01:40769686-40771162	14-7-0	14-7-14	NOTEST	0	0	0	0	1	1	no
Glyma01g30080	Glyma01g30080	Glyma01g30080	Gm01:40777029-40778052	14-7-0	14-7-14	NOTEST	0	0	0	0	1	1	no
Glyma01g30300	Glyma01g30300	Glyma01g30300	Gm01:40952282-40957143	14-7-0	14-7-14	OK	1.90968	4.68494	1.2947	-1.59286	0.111191	0.376095	no
Glyma01g30320	Glyma01g30320	Glyma01g30320	Gm01:40964890-40985483	14-7-0	14-7-14	OK	9.28421	5.84025	-0.66875	0.893537	0.37157	0.697157	no
Glyma01g30335	Glyma01g30335	Glyma01g30335	Gm01:40964890-40985483	14-7-0	14-7-14	OK	0.701636	0.408268	-0.781207	0.203661	0.838618	0.949629	no
Glyma01g30350	Glyma01g30350	Glyma01g30350	Gm01:41014087-41016040	14-7-0	14-7-14	OK	32.9578	14.9715	-1.1384	1.57363	0.115574	0.384854	no
Glyma01g30370	Glyma01g30370	Glyma01g30370	Gm01:41043490-41043758	14-7-0	14-7-14	NOTEST	0	0	0	0	1	1	no
Glyma01g30390	Glyma01g30390	Glyma01g30390	Gm01:41062775-41066889	14-7-0	14-7-14	OK	10.2939	0.298264	-5.10906	5.18322	2.18085e-07	3.67631e-05	yes
Glyma01g30400	Glyma01g30400	Glyma01g30400	Gm01:41067190-41075707	14-7-0	14-7-14	OK	11.6528	12.2745	0.0749894	-0.106045	0.915546	0.973831	no
Glyma01g30431	Glyma01g30431	Glyma01g30431	Gm01:41163921-41165539	14-7-0	14-7-14	NOTEST	0	0	0	0	1	1	no
Glyma01g30460	Glyma01g30460	Glyma01g30460	Gm01:41170972-41176563	14-7-0	14-7-14	NOTEST	0.116535	0.0457288	-1.34959	0.486534	0.626589	1	no
Glyma01g30485	Glyma01g30485	Glyma01g30485	Gm01:41170972-41176563	14-7-0	14-7-14	NOTEST	0	0.0453948	1.79769e+308	1.79769e+308	0.111912	1	no
Glyma01g30511	Glyma01g30511	Glyma01g30511	Gm01:41210645-41210897	14-7-0	14-7-14	NOTEST	0	0	0	0	1	1	no
Glyma01g30535	Glyma01g30535	Glyma01g30535	Gm01:41215563-41218988	14-7-0	14-7-14	NOTEST	0	0	0	0	1	1	no
Glyma01g30560	Glyma01g30560	Glyma01g30560	Gm01:41232630-41234794	14-7-0	14-7-14	NOTEST	0	0	0	0	1	1	no
Glyma01g30610	Glyma01g30610	Glyma01g30610	Gm01:41406971-41411553	14-7-0	14-7-14	NOTEST	0	0.0207648	1.79769e+308	1.79769e+308	0.223676	1	no
Glyma01g30626	Glyma01g30626	Glyma01g30626	Gm01:41440314-41440973	14-7-0	14-7-14	NOTEST	0	0	0	0	1	1	no
Glyma01g30643	Glyma01g30643	Glyma01g30643	Gm01:41457347-41461938	14-7-0	14-7-14	NOTEST	0	0	0	0	1	1	no
Glyma01g30660	Glyma01g30660	Glyma01g30660	Gm01:41493462-41493999	14-7-0	14-7-14	NOTEST	0	0	0	0	1	1	no
Glyma01g30670	Glyma01g30670	Glyma01g30670	Gm01:41495108-41496829	14-7-0	14-7-14	NOTEST	0	0.102685	1.79769e+308	1.79769e+308	0.0940746	1	no
Glyma01g30900	Glyma01g30900	Glyma01g30900	Gm01:41673575-41673782	14-7-0	14-7-14	NOTEST	0	0	0	0	1	1	no
Glyma01g30910	Glyma01g30910	Glyma01g30910	Gm01:41681659-41690953	14-7-0	14-7-14	OK	13.4237	13.7087	0.0303112	-0.0431492	0.965583	0.989847	no
Glyma01g30920	Glyma01g30920	Glyma01g30920	Gm01:41691541-41699290	14-7-0	14-7-14	NOTEST	0.0453906	0.255892	2.49507	-1.81639	0.0693102	1	no
Glyma01g30982	Glyma01g30982	Glyma01g30982	Gm01:41712879-41714252	14-7-0	14-7-14	OK	1.43604	2.88835	1.00815	-1.04687	0.295161	0.626754	no
Glyma01g31044	Glyma01g31044	Glyma01g31044	Gm01:41890431-41892644	14-7-0	14-7-14	OK	1.73372	2.78172	0.682105	-0.757772	0.448587	0.756545	no
Glyma01g31107	Glyma01g31107	Glyma01g31107	Gm01:41928201-41933073	14-7-0	14-7-14	NOTEST	0.1864	0	-1.79769e+308	-1.79769e+308	0.0651685	1	no
Glyma01g31170	Glyma01g31170	Glyma01g31170	Gm01:41986790-41991338	14-7-0	14-7-14	OK	1.71442	2.82934	0.722745	-0.954846	0.339656	0.669274	no
Glyma01g31180	Glyma01g31180	Glyma01g31180	Gm01:41992765-41993572	14-7-0	14-7-14	OK	0.153391	2.31144	3.9135	-2.94992	0.0031786	0.046698	yes
Glyma01g31230	Glyma01g31230	Glyma01g31230	Gm01:42040491-42046500	14-7-0	14-7-14	NOTEST	0	0	0	0	1	1	no
Glyma01g31260	Glyma01g31260	Glyma01g31260	Gm01:42062020-42069161	14-7-0	14-7-14	OK	3.57971	2.73549	-0.388045	0.4967	0.619401	0.855995	no
Glyma01g31270	Glyma01g31270	Glyma01g31270	Gm01:42071523-42074445	14-7-0	14-7-14	OK	19.279	4.54007	-2.08624	2.75589	0.00585332	0.0694392	no
Glyma01g31275	Glyma01g31275	Glyma01g31275	Gm01:42077853-42078844	14-7-0	14-7-14	NOTEST	0	0	0	0	1	1	no
Glyma01g31280	Glyma01g31280	Glyma01g31280	Gm01:42077853-42078844	14-7-0	14-7-14	NOTEST	0	0	0	0	1	1	no
Glyma01g31300	Glyma01g31300	Glyma01g31300	Gm01:42124055-42127597	14-7-0	14-7-14	OK	54.8724	68.3723	0.317331	-0.411537	0.680679	0.885628	no
Glyma01g31311	Glyma01g31311	Glyma01g31311	Gm01:42143417-42149831	14-7-0	14-7-14	OK	7.71781	8.7137	0.175095	-0.232351	0.816265	0.940976	no
Glyma01g31320	Glyma01g31320	Glyma01g31320	Gm01:42162374-42164312	14-7-0	14-7-14	OK	6.76367	32.9181	2.283	-3.08151	0.00205953	0.0351528	yes
Glyma01g31341	Glyma01g31341	Glyma01g31341	Gm01:42226588-42230852	14-7-0	14-7-14	NOTEST	0.0589215	0.137084	1.21819	-0.834392	0.40406	1	no
Glyma01g31360	Glyma01g31360	Glyma01g31360	Gm01:42232501-42236451	14-7-0	14-7-14	OK	16.2509	22.216	0.451077	-0.551615	0.581212	0.83685	no
Glyma01g31370	Glyma01g31370	Glyma01g31370	Gm01:42261741-42265856	14-7-0	14-7-14	OK	0.412299	0.53742	0.38236	-0.353894	0.723418	0.904457	no
Glyma01g31425	Glyma01g31425	Glyma01g31425	Gm01:42373253-42374275	14-7-0	14-7-14	OK	1.05786	2.31237	1.12823	-0.930066	0.352337	0.680961	no
Glyma01g31480	Glyma01g31480	Glyma01g31480	Gm01:42378220-42384123	14-7-0	14-7-14	OK	0.674934	1.07055	0.665535	-0.728464	0.46633	0.768862	no
Glyma01g31520	Glyma01g31520	Glyma01g31520	Gm01:42469464-42474210	14-7-0	14-7-14	NOTEST	0	0	0	0	1	1	no
Glyma01g31550	Glyma01g31550	Glyma01g31550	Gm01:42548413-42558287	14-7-0	14-7-14	NOTEST	0	0	0	0	1	1	no
Glyma01g31570	Glyma01g31570	Glyma01g31570	Gm01:42586307-42593931	14-7-0	14-7-14	OK	7.37959	2.64207	-1.48187	1.96013	0.0499804	0.238475	no
Glyma01g31581	Glyma01g31581	Glyma01g31581	Gm01:42597638-42599280	14-7-0	14-7-14	NOTEST	0	0	0	0	1	1	no
Glyma01g31590	Glyma01g31590	Glyma01g31590	Gm01:42607296-42611243	14-7-0	14-7-14	NOTEST	0.141843	0.174967	0.302787	-0.262269	0.793114	1	no
Glyma01g31600	Glyma01g31600	Glyma01g31600	Gm01:42628300-42629673	14-7-0	14-7-14	OK	42.6262	39.1937	-0.121117	0.161803	0.871461	0.96079	no
Glyma01g31610	Glyma01g31610	Glyma01g31610	Gm01:42631340-42634983	14-7-0	14-7-14	OK	30.3725	18.9891	-0.677596	0.920247	0.357444	0.684877	no
Glyma01g31630	Glyma01g31630	Glyma01g31630	Gm01:42661065-42664809	14-7-0	14-7-14	OK	0.379491	2.06254	2.44228	-1.99828	0.0456868	0.226412	no
Glyma01g31636	Glyma01g31636	Glyma01g31636	Gm01:42667422-42670895	14-7-0	14-7-14	NOTEST	0	0	0	0	1	1	no
Glyma01g31643	Glyma01g31643	Glyma01g31643	Gm01:42681129-42683618	14-7-0	14-7-14	NOTEST	0	0	0	0	1	1	no
Glyma01g31650	Glyma01g31650	Glyma01g31650	Gm01:42697267-42701819	14-7-0	14-7-14	NOTEST	0	0	0	0	1	1	no
Glyma01g31660	Glyma01g31660	Glyma01g31660	Gm01:42724418-42726114	14-7-0	14-7-14	NOTEST	0	0.168778	1.79769e+308	1.79769e+308	0.0702947	1	no
Glyma01g31670	Glyma01g31670	Glyma01g31670	Gm01:42752424-42753269	14-7-0	14-7-14	NOTEST	0	0	0	0	1	1	no
Glyma01g31691	Glyma01g31691	Glyma01g31691	Gm01:42756407-42766923	14-7-0	14-7-14	NOTEST	0	0	0	0	1	1	no
Glyma01g31711	Glyma01g31711	Glyma01g31711	Gm01:42786261-42789612	14-7-0	14-7-14	NOTEST	0	0	0	0	1	1	no
Glyma01g31730	Glyma01g31730	Glyma01g31730	Gm01:42867418-42868294	14-7-0	14-7-14	NOTEST	0	0.0430486	1.79769e+308	1.79769e+308	0.281851	1	no
Glyma01g31750	Glyma01g31750	Glyma01g31750	Gm01:42942064-42943179	14-7-0	14-7-14	OK	5.67462	48.7262	3.1021	-3.97287	7.10113e-05	0.00322539	yes
Glyma01g31760	Glyma01g31760	Glyma01g31760	Gm01:42947350-42947710	14-7-0	14-7-14	NOTEST	0	0	0	0	1	1	no
Glyma01g31780	Glyma01g31780	Glyma01g31780	Gm01:42956928-42957282	14-7-0	14-7-14	NOTEST	0	0	0	0	1	1	no
Glyma01g31801	Glyma01g31801	Glyma01g31801	Gm01:43007888-43008997	14-7-0	14-7-14	NOTEST	0	0	0	0	1	1	no
Glyma01g31820	Glyma01g31820	Glyma01g31820	Gm01:43013160-43013421	14-7-0	14-7-14	NOTEST	0	0	0	0	1	1	no
Glyma01g31830	Glyma01g31830	Glyma01g31830	Gm01:43025615-43026886	14-7-0	14-7-14	OK	4.10972	5.25849	0.355608	-0.438082	0.661327	0.876131	no
Glyma01g31840	Glyma01g31840	Glyma01g31840	Gm01:43069330-43072880	14-7-0	14-7-14	OK	0.60776	2.24972	1.88817	-2.13097	0.0330912	0.191401	no
Glyma01g31850	Glyma01g31850	Glyma01g31850	Gm01:43076459-43079732	14-7-0	14-7-14	NOTEST	0	0	0	0	1	1	no
Glyma01g31860	Glyma01g31860	Glyma01g31860	Gm01:43090292-43094391	14-7-0	14-7-14	NOTEST	0	0	0	0	1	1	no
Glyma01g31890	Glyma01g31890	Glyma01g31890	Gm01:43130697-43137550	14-7-0	14-7-14	OK	0.858344	0.541937	-0.66343	0.581409	0.560965	0.824884	no
Glyma01g31900	Glyma01g31900	Glyma01g31900	Gm01:43140964-43144007	14-7-0	14-7-14	NOTEST	0	0.0600916	1.79769e+308	1.79769e+308	0.0940746	1	no
Glyma01g31910	Glyma01g31910	Glyma01g31910	Gm01:43154205-43156585	14-7-0	14-7-14	NOTEST	0	0	0	0	1	1	no
Glyma01g31921	Glyma01g31921	Glyma01g31921	Gm01:43157131-43160950	14-7-0	14-7-14	NOTEST	0.0830274	0.476837	2.52184	-1.92616	0.0540843	1	no
Glyma01g31930	Glyma01g31930	Glyma01g31930	Gm01:43173872-43179341	14-7-0	14-7-14	OK	3.32787	0.385117	-3.11123	3.4575	0.000545218	0.0140285	yes
Glyma01g31940	Glyma01g31940	Glyma01g31940	Gm01:43217711-43224924	14-7-0	14-7-14	NOTEST	0.297279	0.135167	-1.13707	0.836932	0.402631	1	no
Glyma01g31961	Glyma01g31961	Glyma01g31961	Gm01:43241123-43245445	14-7-0	14-7-14	NOTEST	0	0	0	0	1	1	no
Glyma01g31980	Glyma01g31980	Glyma01g31980	Gm01:43250905-43255641	14-7-0	14-7-14	NOTEST	0.172145	0.364515	1.08235	-0.192224	0.847567	1	no
Glyma01g31990	Glyma01g31990	Glyma01g31990	Gm01:43250905-43255641	14-7-0	14-7-14	OK	8.91707	5.60003	-0.671135	0.860442	0.389546	0.712768	no
Glyma01g32000	Glyma01g32000	Glyma01g32000	Gm01:43264508-43272659	14-7-0	14-7-14	OK	3.76304	8.64516	1.19999	-1.63264	0.102545	0.359899	no
Glyma01g32010	Glyma01g32010	Glyma01g32010	Gm01:43337913-43338530	14-7-0	14-7-14	NOTEST	0	0	0	0	1	1	no
Glyma01g32020	Glyma01g32020	Glyma01g32020	Gm01:43341907-43343025	14-7-0	14-7-14	NOTEST	0	0	0	0	1	1	no
Glyma01g32031	Glyma01g32031	Glyma01g32031	Gm01:43354010-43355755	14-7-0	14-7-14	NOTEST	0	0	0	0	1	1	no
Glyma01g32040	Glyma01g32040	Glyma01g32040	Gm01:43398690-43400994	14-7-0	14-7-14	NOTEST	0	0	0	0	1	1	no
Glyma01g32070	Glyma01g32070	Glyma01g32070	Gm01:43424973-43427243	14-7-0	14-7-14	NOTEST	0	0	0	0	1	1	no
Glyma01g32081	Glyma01g32081	Glyma01g32081	Gm01:43450179-43450730	14-7-0	14-7-14	NOTEST	0	0	0	0	1	1	no
Glyma01g32090	Glyma01g32090	Glyma01g32090	Gm01:43463846-43470841	14-7-0	14-7-14	OK	3.83526	5.50744	0.522058	-0.717016	0.473364	0.772939	no
Glyma01g32103	Glyma01g32103	Glyma01g32103	Gm01:43463846-43470841	14-7-0	14-7-14	OK	0.177143	0.634186	1.83999	-0.315419	0.752443	0.916649	no
Glyma01g32116	Glyma01g32116	Glyma01g32116	Gm01:43502972-43506823	14-7-0	14-7-14	NOTEST	0	0.0202745	1.79769e+308	1.79769e+308	0.223676	1	no
Glyma01g32130	Glyma01g32130	Glyma01g32130	Gm01:43553617-43555903	14-7-0	14-7-14	NOTEST	0	0.325526	1.79769e+308	1.79769e+308	0.0618289	1	no
Glyma01g32140	Glyma01g32140	Glyma01g32140	Gm01:43570735-43574743	14-7-0	14-7-14	OK	1.12335	5.57934	2.31229	-2.3545	0.0185477	0.139446	no
Glyma01g32160	Glyma01g32160	Glyma01g32160	Gm01:43604977-43607065	14-7-0	14-7-14	NOTEST	0	0	0	0	1	1	no
Glyma01g32190	Glyma01g32190	Glyma01g32190	Gm01:43621003-43623360	14-7-0	14-7-14	NOTEST	0	0	0	0	1	1	no
Glyma01g32211	Glyma01g32211	Glyma01g32211	Gm01:43638172-43638537	14-7-0	14-7-14	NOTEST	0	0	0	0	1	1	no
Glyma01g32230	Glyma01g32230	Glyma01g32230	Gm01:43687454-43687922	14-7-0	14-7-14	NOTEST	0	0.111297	1.79769e+308	1.79769e+308	0.295535	1	no
Glyma01g32270	Glyma01g32270	Glyma01g32270	Gm01:43720350-43722510	14-7-0	14-7-14	NOTEST	0	0.0283124	1.79769e+308	1.79769e+308	0.223676	1	no
Glyma01g32291	Glyma01g32291	Glyma01g32291	Gm01:43773470-43774094	14-7-0	14-7-14	OK	0.654097	0.152952	-2.09643	0.976983	0.328578	0.658989	no
Glyma01g32310	Glyma01g32310	Glyma01g32310	Gm01:43784204-43786716	14-7-0	14-7-14	NOTEST	0	0	0	0	1	1	no
Glyma01g32340	Glyma01g32340	Glyma01g32340	Gm01:43819827-43820154	14-7-0	14-7-14	NOTEST	0	0	0	0	1	1	no
Glyma01g32360	Glyma01g32360	Glyma01g32360	Gm01:43828911-43832736	14-7-0	14-7-14	NOTEST	0.0579875	0.0214014	-1.43804	0.654086	0.513057	1	no
Glyma01g32370	Glyma01g32370	Glyma01g32370	Gm01:43834206-43835697	14-7-0	14-7-14	OK	2.70294	5.00808	0.889728	-1.06853	0.285283	0.615896	no
Glyma01g32380	Glyma01g32380	Glyma01g32380	Gm01:43870379-43873398	14-7-0	14-7-14	OK	1.53006	2.62686	0.779753	-0.969156	0.332467	0.662593	no
Glyma01g32390	Glyma01g32390	Glyma01g32390	Gm01:43912452-43917776	14-7-0	14-7-14	NOTEST	0.10789	0.0836152	-0.367718	0.141921	0.887142	1	no
Glyma01g32400	Glyma01g32400	Glyma01g32400	Gm01:43922908-43926832	14-7-0	14-7-14	OK	2.98622	11.4525	1.93926	-2.66601	0.00767566	0.0818178	no
Glyma01g32415	Glyma01g32415	Glyma01g32415	Gm01:43929164-43930175	14-7-0	14-7-14	NOTEST	0	0	0	0	1	1	no
Glyma01g32430	Glyma01g32430	Glyma01g32430	Gm01:43974483-43977133	14-7-0	14-7-14	OK	0.416229	1.0617	1.35092	-1.41233	0.157852	0.457162	no
Glyma01g32440	Glyma01g32440	Glyma01g32440	Gm01:43989758-43991730	14-7-0	14-7-14	OK	1.27792	3.11796	1.2868	-1.50067	0.133441	0.416483	no
Glyma01g32450	Glyma01g32450	Glyma01g32450	Gm01:44035709-44042969	14-7-0	14-7-14	OK	71.2187	11.5732	-2.62147	3.07103	0.00213319	0.0360526	yes
Glyma01g32460	Glyma01g32460	Glyma01g32460	Gm01:44035709-44042969	14-7-0	14-7-14	LOWDATA	0	0	-2.62147	0	1	1	no
Glyma01g32480	Glyma01g32480	Glyma01g32480	Gm01:44085644-44091881	14-7-0	14-7-14	NOTEST	0	0	0	0	1	1	no
Glyma01g32680	Glyma01g32680	Glyma01g32680	Gm01:44207946-44213690	14-7-0	14-7-14	OK	5.4805	2.4481	-1.16265	1.32072	0.186596	0.500554	no
Glyma01g32690	Glyma01g32690	Glyma01g32690	Gm01:44229408-44236211	14-7-0	14-7-14	OK	7.43892	7.86172	0.0797517	-0.113336	0.909764	0.972454	no
Glyma01g32750	Glyma01g32750	Glyma01g32750	Gm01:44319318-44320867	14-7-0	14-7-14	OK	2070.87	2550.32	0.300445	-0.180861	0.856477	0.956538	no
Glyma01g32760	Glyma01g32760	Glyma01g32760	Gm01:44347887-44349526	14-7-0	14-7-14	NOTEST	0	0.0488567	1.79769e+308	1.79769e+308	0.223676	1	no
Glyma01g32775	Glyma01g32775	Glyma01g32775	Gm01:44353224-44356977	14-7-0	14-7-14	NOTEST	0	0.0376721	1.79769e+308	1.79769e+308	0.141284	1	no
Glyma01g32790	Glyma01g32790	Glyma01g32790	Gm01:44365503-44368345	14-7-0	14-7-14	OK	3.8777	3.01852	-0.361358	0.468741	0.639255	0.865065	no
Glyma01g32800	Glyma01g32800	Glyma01g32800	Gm01:44381434-44383734	14-7-0	14-7-14	OK	0.923559	0.172447	-2.42105	2.00432	0.0450353	0.224777	no
Glyma01g32810	Glyma01g32810	Glyma01g32810	Gm01:44384412-44392444	14-7-0	14-7-14	OK	0.464309	0.774942	0.739003	-0.698038	0.485153	0.781041	no
Glyma01g32825	Glyma01g32825	Glyma01g32825	Gm01:44418267-44430426	14-7-0	14-7-14	NOTEST	0.0620359	0.16944	1.4496	-1.01213	0.311475	1	no
Glyma01g32841	Glyma01g32841	Glyma01g32841	Gm01:44482207-44482737	14-7-0	14-7-14	NOTEST	0.217981	0.0842151	-1.37205	0.624072	0.53258	1	no
Glyma01g32855	Glyma01g32855	Glyma01g32855	Gm01:44489898-44494310	14-7-0	14-7-14	NOTEST	0.0278334	0.320622	3.52598	-2.02368	0.0430029	1	no
Glyma01g32870	Glyma01g32870	Glyma01g32870	Gm01:44497093-44498739	14-7-0	14-7-14	OK	18.1533	14.0453	-0.370139	0.498073	0.618432	0.855661	no
Glyma01g32881	Glyma01g32881	Glyma01g32881	Gm01:44501342-44502103	14-7-0	14-7-14	OK	0.640952	0.389574	-0.718321	0.550773	0.581789	0.837276	no
Glyma01g32890	Glyma01g32890	Glyma01g32890	Gm01:44504750-44507253	14-7-0	14-7-14	OK	1.33936	0.523324	-1.35576	1.08346	0.278603	0.60932	no
Glyma01g32900	Glyma01g32900	Glyma01g32900	Gm01:44534734-44540055	14-7-0	14-7-14	NOTEST	0	0	0	0	1	1	no
Glyma01g32920	Glyma01g32920	Glyma01g32920	Gm01:44562541-44564228	14-7-0	14-7-14	OK	0.504743	0.377727	-0.418204	0.347315	0.728355	0.906368	no
Glyma01g32940	Glyma01g32940	Glyma01g32940	Gm01:44595567-44597755	14-7-0	14-7-14	NOTEST	0	0	0	0	1	1	no
Glyma01g32961	Glyma01g32961	Glyma01g32961	Gm01:44638341-44639787	14-7-0	14-7-14	NOTEST	0	0	0	0	1	1	no
Glyma01g32981	Glyma01g32981	Glyma01g32981	Gm01:44662613-44664324	14-7-0	14-7-14	NOTEST	0.174378	0.324733	0.897039	-0.74333	0.457282	1	no
Glyma01g33000	Glyma01g33000	Glyma01g33000	Gm01:44707383-44712370	14-7-0	14-7-14	NOTEST	0.417468	0.136938	-1.60814	1.21186	0.225568	1	no
Glyma01g33017	Glyma01g33017	Glyma01g33017	Gm01:44713495-44722187	14-7-0	14-7-14	OK	5.4655	4.80681	-0.185273	0.246708	0.805134	0.936665	no
Glyma01g33034	Glyma01g33034	Glyma01g33034	Gm01:44713495-44722187	14-7-0	14-7-14	OK	0.340327	1.16447	1.77468	-0.71705	0.473344	0.772939	no
Glyma01g33052	Glyma01g33052	Glyma01g33052	Gm01:44724345-44725089	14-7-0	14-7-14	NOTEST	0	0	0	0	1	1	no
Glyma01g33070	Glyma01g33070	Glyma01g33070	Gm01:44755155-44764276	14-7-0	14-7-14	OK	0	0.871435	1.79769e+308	1.79769e+308	0.0387155	0.207415	no
Glyma01g33080	Glyma01g33080	Glyma01g33080	Gm01:44784821-44785786	14-7-0	14-7-14	OK	0	8.86871	1.79769e+308	1.79769e+308	0.0702947	0.288653	no
Glyma01g33097	Glyma01g33097	Glyma01g33097	Gm01:44790872-44791190	14-7-0	14-7-14	NOTEST	0	0.429111	1.79769e+308	1.79769e+308	0.223676	1	no
Glyma01g33114	Glyma01g33114	Glyma01g33114	Gm01:44806144-44806480	14-7-0	14-7-14	NOTEST	0	0	0	0	1	1	no
Glyma01g33132	Glyma01g33132	Glyma01g33132	Gm01:44822529-44827918	14-7-0	14-7-14	NOTEST	0	0	0	0	1	1	no
Glyma01g33150	Glyma01g33150	Glyma01g33150	Gm01:44831611-44835997	14-7-0	14-7-14	NOTEST	0	0.0353564	1.79769e+308	1.79769e+308	0.141284	1	no
Glyma01g33160	Glyma01g33160	Glyma01g33160	Gm01:44884977-44888493	14-7-0	14-7-14	NOTEST	0	0	0	0	1	1	no
Glyma01g33170	Glyma01g33170	Glyma01g33170	Gm01:44905880-44910333	14-7-0	14-7-14	NOTEST	0	0.093724	1.79769e+308	1.79769e+308	0.0777245	1	no
Glyma01g33181	Glyma01g33181	Glyma01g33181	Gm01:44911452-44912574	14-7-0	14-7-14	NOTEST	0	0	0	0	1	1	no
Glyma01g33191	Glyma01g33191	Glyma01g33191	Gm01:44940045-44941190	14-7-0	14-7-14	NOTEST	0	0	0	0	1	1	no
Glyma01g33200	Glyma01g33200	Glyma01g33200	Gm01:44962980-44967133	14-7-0	14-7-14	OK	17.2661	13.8059	-0.322656	0.458592	0.646527	0.868811	no
Glyma01g33220	Glyma01g33220	Glyma01g33220	Gm01:44980052-44984577	14-7-0	14-7-14	OK	8.78881	10.8983	0.310357	-0.437381	0.661835	0.876346	no
Glyma01g33240	Glyma01g33240	Glyma01g33240	Gm01:45046813-45053379	14-7-0	14-7-14	OK	6.00518	7.31368	0.284391	-0.40493	0.685529	0.887208	no
Glyma01g33270	Glyma01g33270	Glyma01g33270	Gm01:45164206-45167759	14-7-0	14-7-14	OK	4.9565	14.3805	1.53672	-2.13061	0.0331214	0.191474	no
Glyma01g33281	Glyma01g33281	Glyma01g33281	Gm01:45184472-45185139	14-7-0	14-7-14	NOTEST	0	0	0	0	1	1	no
Glyma01g33290	Glyma01g33290	Glyma01g33290	Gm01:45230344-45235073	14-7-0	14-7-14	OK	3.11931	2.26237	-0.463393	0.618766	0.53607	0.810837	no
Glyma01g33300	Glyma01g33300	Glyma01g33300	Gm01:45287112-45288519	14-7-0	14-7-14	NOTEST	0	0	0	0	1	1	no
Glyma01g33313	Glyma01g33313	Glyma01g33313	Gm01:45306250-45306442	14-7-0	14-7-14	NOTEST	0	0	0	0	1	1	no
Glyma01g33326	Glyma01g33326	Glyma01g33326	Gm01:45317460-45320741	14-7-0	14-7-14	NOTEST	0	0	0	0	1	1	no
Glyma01g33340	Glyma01g33340	Glyma01g33340	Gm01:45339891-45344677	14-7-0	14-7-14	NOTEST	0.076056	0.0551608	-0.463419	0.26618	0.790101	1	no
Glyma01g33350	Glyma01g33350	Glyma01g33350	Gm01:45352146-45354813	14-7-0	14-7-14	NOTEST	0	0.0461283	1.79769e+308	1.79769e+308	0.223676	1	no
Glyma01g33370	Glyma01g33370	Glyma01g33370	Gm01:45401644-45404974	14-7-0	14-7-14	NOTEST	0.0940641	0.361374	1.94178	-1.39562	0.162829	1	no
Glyma01g33380	Glyma01g33380	Glyma01g33380	Gm01:45433046-45455133	14-7-0	14-7-14	OK	1.44677	2.41174	0.737244	-0.636976	0.52414	0.804318	no
Glyma01g33420	Glyma01g33420	Glyma01g33420	Gm01:45530801-45532165	14-7-0	14-7-14	OK	0.0853085	1.21464	3.8317	-2.9142	0.00356601	0.0504409	no
Glyma01g33430	Glyma01g33430	Glyma01g33430	Gm01:45548731-45551079	14-7-0	14-7-14	NOTEST	0	0	0	0	1	1	no
Glyma01g33440	Glyma01g33440	Glyma01g33440	Gm01:45561036-45565329	14-7-0	14-7-14	NOTEST	0.0526796	0.0946102	0.844751	-0.578608	0.562854	1	no
Glyma01g33461	Glyma01g33461	Glyma01g33461	Gm01:45637083-45640786	14-7-0	14-7-14	NOTEST	0	0	0	0	1	1	no
Glyma01g33480	Glyma01g33480	Glyma01g33480	Gm01:45640951-45643255	14-7-0	14-7-14	NOTEST	0	0	0	0	1	1	no
Glyma01g33500	Glyma01g33500	Glyma01g33500	Gm01:45666010-45668198	14-7-0	14-7-14	NOTEST	0	0	0	0	1	1	no
Glyma01g33510	Glyma01g33510	Glyma01g33510	Gm01:45669204-45672362	14-7-0	14-7-14	NOTEST	0	0	0	0	1	1	no
Glyma01g33520	Glyma01g33520	Glyma01g33520	Gm01:45685075-45692774	14-7-0	14-7-14	OK	12.4443	7.70835	-0.690995	0.872205	0.383097	0.707181	no
Glyma01g33560	Glyma01g33560	Glyma01g33560	Gm01:45743456-45744317	14-7-0	14-7-14	NOTEST	0	0	0	0	1	1	no
Glyma01g33575	Glyma01g33575	Glyma01g33575	Gm01:45782142-45782607	14-7-0	14-7-14	NOTEST	0	0	0	0	1	1	no
Glyma01g33590	Glyma01g33590	Glyma01g33590	Gm01:45785878-45786501	14-7-0	14-7-14	NOTEST	0	0	0	0	1	1	no
Glyma01g33600	Glyma01g33600	Glyma01g33600	Gm01:45786844-45790318	14-7-0	14-7-14	OK	4.40004	6.25879	0.508367	-0.609365	0.542283	0.814098	no
Glyma01g33610	Glyma01g33610	Glyma01g33610	Gm01:45796676-45800002	14-7-0	14-7-14	OK	4.86377	5.4482	0.163703	-0.222912	0.823604	0.943673	no
Glyma01g33620	Glyma01g33620	Glyma01g33620	Gm01:45803536-45806513	14-7-0	14-7-14	OK	1.52169	0.931066	-0.708716	0.717318	0.473178	0.772905	no
Glyma01g33635	Glyma01g33635	Glyma01g33635	Gm01:45827324-45830713	14-7-0	14-7-14	NOTEST	0	0	0	0	1	1	no
Glyma01g33650	Glyma01g33650	Glyma01g33650	Gm01:45852397-45854700	14-7-0	14-7-14	OK	2.30663	4.90478	1.0884	-1.44732	0.147807	0.441075	no
Glyma01g33660	Glyma01g33660	Glyma01g33660	Gm01:45858147-45867014	14-7-0	14-7-14	OK	11.2476	16.5208	0.554666	-0.77068	0.440896	0.751903	no
Glyma01g33676	Glyma01g33676	Glyma01g33676	Gm01:45892351-45898318	14-7-0	14-7-14	OK	1.83751	1.2658	-0.537702	0.636007	0.524772	0.804525	no
Glyma01g33692	Glyma01g33692	Glyma01g33692	Gm01:45905544-45906417	14-7-0	14-7-14	NOTEST	0	0	0	0	1	1	no
Glyma01g33708	Glyma01g33708	Glyma01g33708	Gm01:45911622-45912362	14-7-0	14-7-14	NOTEST	0	0	0	0	1	1	no
Glyma01g33724	Glyma01g33724	Glyma01g33724	Gm01:45932771-45933893	14-7-0	14-7-14	OK	2.75447	2.52627	-0.124762	0.142469	0.886709	0.965001	no
Glyma01g33740	Glyma01g33740	Glyma01g33740	Gm01:45948913-45964890	14-7-0	14-7-14	NOTEST	0	0	0	0	1	1	no
Glyma01g33761	Glyma01g33761	Glyma01g33761	Gm01:45948913-45964890	14-7-0	14-7-14	OK	2.78027	2.61555	-0.0881116	0.102512	0.918351	0.975028	no
Glyma01g33782	Glyma01g33782	Glyma01g33782	Gm01:45948913-45964890	14-7-0	14-7-14	NOTEST	0	0.0392798	1.79769e+308	1.79769e+308	0.41363	1	no
Glyma01g33803	Glyma01g33803	Glyma01g33803	Gm01:45990835-45994797	14-7-0	14-7-14	NOTEST	0	0	0	0	1	1	no
Glyma01g33824	Glyma01g33824	Glyma01g33824	Gm01:46002247-46005198	14-7-0	14-7-14	NOTEST	0	0	0	0	1	1	no
Glyma01g33845	Glyma01g33845	Glyma01g33845	Gm01:46007636-46011913	14-7-0	14-7-14	NOTEST	0	0	0	0	1	1	no
Glyma01g33866	Glyma01g33866	Glyma01g33866	Gm01:46043835-46074615	14-7-0	14-7-14	OK	6.23192	4.72993	-0.39786	0.538006	0.590573	0.84195	no
Glyma01g33888	Glyma01g33888	Glyma01g33888	Gm01:46096266-46097858	14-7-0	14-7-14	NOTEST	0	0	0	0	1	1	no
Glyma01g33910	Glyma01g33910	Glyma01g33910	Gm01:46103382-46104985	14-7-0	14-7-14	NOTEST	0.379565	0.220771	-0.781795	0.629557	0.528984	1	no
Glyma01g33920	Glyma01g33920	Glyma01g33920	Gm01:46115248-46117119	14-7-0	14-7-14	NOTEST	0	0	0	0	1	1	no
Glyma01g33960	Glyma01g33960	Glyma01g33960	Gm01:46237540-46239330	14-7-0	14-7-14	NOTEST	0	0	0	0	1	1	no
Glyma01g33986	Glyma01g33986	Glyma01g33986	Gm01:46305207-46307924	14-7-0	14-7-14	NOTEST	0	0	0	0	1	1	no
Glyma01g34013	Glyma01g34013	Glyma01g34013	Gm01:46321601-46322033	14-7-0	14-7-14	NOTEST	0	0	0	0	1	1	no
Glyma01g34040	Glyma01g34040	Glyma01g34040	Gm01:46325425-46325842	14-7-0	14-7-14	NOTEST	0	0	0	0	1	1	no
Glyma01g34060	Glyma01g34060	Glyma01g34060	Gm01:46360579-46360996	14-7-0	14-7-14	NOTEST	0	0	0	0	1	1	no
Glyma01g34111	Glyma01g34111	Glyma01g34111	Gm01:46405622-46406054	14-7-0	14-7-14	NOTEST	0	0	0	0	1	1	no
Glyma01g34160	Glyma01g34160	Glyma01g34160	Gm01:46426795-46427518	14-7-0	14-7-14	NOTEST	0	0	0	0	1	1	no
Glyma01g34180	Glyma01g34180	Glyma01g34180	Gm01:46434724-46435093	14-7-0	14-7-14	NOTEST	0	0	0	0	1	1	no
Glyma01g34210	Glyma01g34210	Glyma01g34210	Gm01:46467747-46468471	14-7-0	14-7-14	NOTEST	0	0	0	0	1	1	no
Glyma01g34223	Glyma01g34223	Glyma01g34223	Gm01:46519589-46520799	14-7-0	14-7-14	NOTEST	0	0	0	0	1	1	no
Glyma01g34236	Glyma01g34236	Glyma01g34236	Gm01:46527137-46531737	14-7-0	14-7-14	OK	0.631337	0.451933	-0.4823	0.402527	0.687297	0.887905	no
Glyma01g34250	Glyma01g34250	Glyma01g34250	Gm01:46534521-46534953	14-7-0	14-7-14	NOTEST	0	0	0	0	1	1	no
Glyma01g34260	Glyma01g34260	Glyma01g34260	Gm01:46537220-46537655	14-7-0	14-7-14	NOTEST	0	0	0	0	1	1	no
Glyma01g34270	Glyma01g34270	Glyma01g34270	Gm01:46573515-46583536	14-7-0	14-7-14	OK	6.49816	7.43083	0.193494	-0.268951	0.787967	0.93018	no
Glyma01g34300	Glyma01g34300	Glyma01g34300	Gm01:46676161-46677711	14-7-0	14-7-14	OK	818.893	30.0797	-4.76681	4.10448	4.05227e-05	0.00211358	yes
Glyma01g34321	Glyma01g34321	Glyma01g34321	Gm01:46693841-46694273	14-7-0	14-7-14	NOTEST	0	0	0	0	1	1	no
Glyma01g34340	Glyma01g34340	Glyma01g34340	Gm01:46707889-46726051	14-7-0	14-7-14	NOTEST	0	0	0	0	1	1	no
Glyma01g34350	Glyma01g34350	Glyma01g34350	Gm01:46731685-46740931	14-7-0	14-7-14	OK	5.33823	3.19024	-0.742695	0.944922	0.344699	0.673766	no
Glyma01g34360	Glyma01g34360	Glyma01g34360	Gm01:46742637-46747004	14-7-0	14-7-14	OK	0	0.969817	1.79769e+308	1.79769e+308	0.0450558	0.224777	no
Glyma01g34370	Glyma01g34370	Glyma01g34370	Gm01:46749398-46751642	14-7-0	14-7-14	NOTEST	0.167535	0.391465	1.22443	-0.838664	0.401658	1	no
Glyma01g34380	Glyma01g34380	Glyma01g34380	Gm01:46754477-46758976	14-7-0	14-7-14	OK	2.80972	1.48388	-0.921053	0.960204	0.336953	0.666386	no
Glyma01g34400	Glyma01g34400	Glyma01g34400	Gm01:46763231-46763483	14-7-0	14-7-14	OK	20.3519	0	-1.79769e+308	-1.79769e+308	0.026518	0.171082	no
Glyma01g34410	Glyma01g34410	Glyma01g34410	Gm01:46764767-46772182	14-7-0	14-7-14	OK	1.69569	6.63114	1.96739	-2.25394	0.0241996	0.163513	no
Glyma01g34420	Glyma01g34420	Glyma01g34420	Gm01:46787052-46789561	14-7-0	14-7-14	NOTEST	0	0	0	0	1	1	no
Glyma01g34443	Glyma01g34443	Glyma01g34443	Gm01:46808690-46811728	14-7-0	14-7-14	NOTEST	0	0	0	0	1	1	no
Glyma01g34466	Glyma01g34466	Glyma01g34466	Gm01:46825911-46827713	14-7-0	14-7-14	NOTEST	0	0	0	0	1	1	no
Glyma01g34490	Glyma01g34490	Glyma01g34490	Gm01:46835873-46838757	14-7-0	14-7-14	NOTEST	0	0.0362231	1.79769e+308	1.79769e+308	0.223676	1	no
Glyma01g34506	Glyma01g34506	Glyma01g34506	Gm01:46869789-46881811	14-7-0	14-7-14	OK	1.31304	1.7187	0.38841	-0.435957	0.662868	0.87672	no
Glyma01g34523	Glyma01g34523	Glyma01g34523	Gm01:46869789-46881811	14-7-0	14-7-14	NOTEST	0	0	0	0	1	1	no
Glyma01g34540	Glyma01g34540	Glyma01g34540	Gm01:46906412-46911701	14-7-0	14-7-14	NOTEST	0	0.188093	1.79769e+308	1.79769e+308	0.0558529	1	no
Glyma01g34560	Glyma01g34560	Glyma01g34560	Gm01:46925228-46938022	14-7-0	14-7-14	OK	1.11805	2.50585	1.16432	-1.30038	0.193469	0.510532	no
Glyma01g34570	Glyma01g34570	Glyma01g34570	Gm01:46940993-46942519	14-7-0	14-7-14	NOTEST	0.0688426	0.242088	1.81415	-1.28037	0.200414	1	no
Glyma01g34580	Glyma01g34580	Glyma01g34580	Gm01:46987337-46989392	14-7-0	14-7-14	NOTEST	0	0	0	0	1	1	no
Glyma01g34590	Glyma01g34590	Glyma01g34590	Gm01:46994947-47011742	14-7-0	14-7-14	NOTEST	0.0247718	0.279251	3.49479	-2.59901	0.00934938	1	no
Glyma01g34605	Glyma01g34605	Glyma01g34605	Gm01:47017352-47017572	14-7-0	14-7-14	NOTEST	0	0	0	0	1	1	no
Glyma01g34620	Glyma01g34620	Glyma01g34620	Gm01:47044532-47046263	14-7-0	14-7-14	NOTEST	0	0.154583	1.79769e+308	1.79769e+308	0.0777245	1	no
Glyma01g34630	Glyma01g34630	Glyma01g34630	Gm01:47059946-47069275	14-7-0	14-7-14	OK	6.44827	8.13439	0.335122	-0.441755	0.658667	0.87547	no
Glyma01g34650	Glyma01g34650	Glyma01g34650	Gm01:47081810-47085604	14-7-0	14-7-14	OK	0.068412	0.546485	2.99786	-1.8993	0.0575256	0.258521	no
Glyma01g34660	Glyma01g34660	Glyma01g34660	Gm01:47090148-47094163	14-7-0	14-7-14	OK	17.2392	10.3762	-0.732408	0.993993	0.320226	0.651307	no
Glyma01g34671	Glyma01g34671	Glyma01g34671	Gm01:47112164-47117514	14-7-0	14-7-14	NOTEST	0	0	0	0	1	1	no
Glyma01g34680	Glyma01g34680	Glyma01g34680	Gm01:47129774-47133165	14-7-0	14-7-14	OK	2.4468	1.02498	-1.2553	1.2296	0.218849	0.542198	no
Glyma01g34690	Glyma01g34690	Glyma01g34690	Gm01:47136977-47141477	14-7-0	14-7-14	OK	10.8298	4.0741	-1.41046	1.45714	0.145078	0.436715	no
Glyma01g34700	Glyma01g34700	Glyma01g34700	Gm01:47141945-47148729	14-7-0	14-7-14	OK	138.629	26.9804	-2.36125	2.11813	0.0341639	0.194598	no
Glyma01g34710	Glyma01g34710	Glyma01g34710	Gm01:47159471-47160816	14-7-0	14-7-14	NOTEST	0	0	0	0	1	1	no
Glyma01g34723	Glyma01g34723	Glyma01g34723	Gm01:47186498-47195065	14-7-0	14-7-14	NOTEST	0	0	0	0	1	1	no
Glyma01g34736	Glyma01g34736	Glyma01g34736	Gm01:47186498-47195065	14-7-0	14-7-14	NOTEST	0.0800842	0.0146039	-2.45516	0.477593	0.63294	1	no
Glyma01g34750	Glyma01g34750	Glyma01g34750	Gm01:47186498-47195065	14-7-0	14-7-14	NOTEST	0	0	0	0	1	1	no
Glyma01g34760	Glyma01g34760	Glyma01g34760	Gm01:47218316-47222203	14-7-0	14-7-14	NOTEST	0	0	0	0	1	1	no
Glyma01g34770	Glyma01g34770	Glyma01g34770	Gm01:47223841-47226695	14-7-0	14-7-14	NOTEST	0	0	0	0	1	1	no
Glyma01g34780	Glyma01g34780	Glyma01g34780	Gm01:47252139-47259720	14-7-0	14-7-14	OK	9.28257	8.06945	-0.202054	0.251347	0.801546	0.935911	no
Glyma01g34791	Glyma01g34791	Glyma01g34791	Gm01:47272202-47272649	14-7-0	14-7-14	NOTEST	0	0	0	0	1	1	no
Glyma01g34800	Glyma01g34800	Glyma01g34800	Gm01:47276056-47279637	14-7-0	14-7-14	NOTEST	0	0.109554	1.79769e+308	1.79769e+308	0.0777245	1	no
Glyma01g34820	Glyma01g34820	Glyma01g34820	Gm01:47295116-47298579	14-7-0	14-7-14	OK	6.70682	11.0239	0.716936	-1.01374	0.310708	0.642107	no
Glyma01g34830	Glyma01g34830	Glyma01g34830	Gm01:47301280-47303164	14-7-0	14-7-14	NOTEST	0.100018	0.323251	1.6924	-1.35541	0.175287	1	no
Glyma01g34840	Glyma01g34840	Glyma01g34840	Gm01:47306519-47315257	14-7-0	14-7-14	OK	3.98039	4.32845	0.12094	-0.172223	0.863262	0.958674	no
Glyma01g34890	Glyma01g34890	Glyma01g34890	Gm01:47380345-47383987	14-7-0	14-7-14	NOTEST	0	0	0	0	1	1	no
Glyma01g34930	Glyma01g34930	Glyma01g34930	Gm01:47416768-47417287	14-7-0	14-7-14	OK	0.252747	1.70221	2.75165	-2.0121	0.0442098	0.22267	no
Glyma01g34940	Glyma01g34940	Glyma01g34940	Gm01:47418176-47422790	14-7-0	14-7-14	OK	5.87339	4.41625	-0.41137	0.54431	0.586228	0.839452	no
Glyma01g34950	Glyma01g34950	Glyma01g34950	Gm01:47484620-47488243	14-7-0	14-7-14	NOTEST	0	0	0	0	1	1	no
Glyma01g34960	Glyma01g34960	Glyma01g34960	Gm01:47484620-47488243	14-7-0	14-7-14	OK	0.587288	0.883456	0.589091	-0.523258	0.600795	0.846914	no
Glyma01g34971	Glyma01g34971	Glyma01g34971	Gm01:47509796-47513893	14-7-0	14-7-14	NOTEST	0	0	0	0	1	1	no
Glyma01g34980	Glyma01g34980	Glyma01g34980	Gm01:47515002-47518685	14-7-0	14-7-14	OK	2.01844	3.29953	0.709021	-0.935963	0.349292	0.678003	no
Glyma01g34990	Glyma01g34990	Glyma01g34990	Gm01:47519487-47522901	14-7-0	14-7-14	OK	0.808793	1.36489	0.754942	-0.757794	0.448574	0.756545	no
Glyma01g35010	Glyma01g35010	Glyma01g35010	Gm01:47557393-47559050	14-7-0	14-7-14	OK	1.82832	2.39478	0.389376	-0.43956	0.660256	0.876079	no
Glyma01g35030	Glyma01g35030	Glyma01g35030	Gm01:47605850-47609703	14-7-0	14-7-14	OK	26.1436	11.239	-1.21795	1.68749	0.0915088	0.337134	no
Glyma01g35043	Glyma01g35043	Glyma01g35043	Gm01:47610784-47630469	14-7-0	14-7-14	OK	4.26792	4.68667	0.13503	-0.168429	0.866246	0.959746	no
Glyma01g35056	Glyma01g35056	Glyma01g35056	Gm01:47635648-47638176	14-7-0	14-7-14	NOTEST	0.0243497	0.168072	2.7871	-1.54931	0.121307	1	no
Glyma01g35070	Glyma01g35070	Glyma01g35070	Gm01:47640057-47641838	14-7-0	14-7-14	NOTEST	0	0	0	0	1	1	no
Glyma01g35083	Glyma01g35083	Glyma01g35083	Gm01:47647068-47659579	14-7-0	14-7-14	OK	8.00366	5.00433	-0.677483	0.921687	0.356692	0.684358	no
Glyma01g35096	Glyma01g35096	Glyma01g35096	Gm01:47647068-47659579	14-7-0	14-7-14	OK	0.143013	0.86269	2.5927	-0.674798	0.499804	0.789271	no
Glyma01g35110	Glyma01g35110	Glyma01g35110	Gm01:47674344-47678727	14-7-0	14-7-14	OK	2.10627	7.14434	1.76211	-2.19974	0.0278255	0.175342	no
Glyma01g35120	Glyma01g35120	Glyma01g35120	Gm01:47680344-47682544	14-7-0	14-7-14	NOTEST	0	0.0189903	1.79769e+308	1.79769e+308	0.223676	1	no
Glyma01g35130	Glyma01g35130	Glyma01g35130	Gm01:47684337-47693236	14-7-0	14-7-14	OK	14.1927	20.4644	0.527964	-0.750748	0.452804	0.759426	no
Glyma01g35145	Glyma01g35145	Glyma01g35145	Gm01:47696213-47700220	14-7-0	14-7-14	OK	5.4754	2.75523	-0.990792	1.27633	0.20184	0.520648	no
Glyma01g35160	Glyma01g35160	Glyma01g35160	Gm01:47703725-47705225	14-7-0	14-7-14	OK	1.89568	1.09213	-0.795565	0.810422	0.417698	0.734477	no
Glyma01g35170	Glyma01g35170	Glyma01g35170	Gm01:47707392-47708756	14-7-0	14-7-14	OK	7.63009	3.29333	-1.21215	1.47745	0.139556	0.427544	no
Glyma01g35180	Glyma01g35180	Glyma01g35180	Gm01:47718336-47725678	14-7-0	14-7-14	NOTEST	0.0868817	0.273056	1.65207	-1.22206	0.221684	1	no
Glyma01g35190	Glyma01g35190	Glyma01g35190	Gm01:47727548-47732948	14-7-0	14-7-14	OK	43.8	31.0919	-0.494393	0.616642	0.537471	0.811131	no
Glyma01g35201	Glyma01g35201	Glyma01g35201	Gm01:47733363-47734311	14-7-0	14-7-14	OK	1.91141	4.33981	1.18299	-0.919925	0.357612	0.684959	no
Glyma01g35211	Glyma01g35211	Glyma01g35211	Gm01:47738908-47740460	14-7-0	14-7-14	NOTEST	0	0	0	0	1	1	no
Glyma01g35220	Glyma01g35220	Glyma01g35220	Gm01:47744055-47749293	14-7-0	14-7-14	OK	38.0695	84.4819	1.15001	-0.987996	0.323155	0.654263	no
Glyma01g35230	Glyma01g35230	Glyma01g35230	Gm01:47776150-47780905	14-7-0	14-7-14	OK	8.18694	11.911	0.5409	-0.763229	0.445327	0.754603	no
Glyma01g35255	Glyma01g35255	Glyma01g35255	Gm01:47796276-47802389	14-7-0	14-7-14	NOTEST	0	0.245753	1.79769e+308	1.79769e+308	0.035846	1	no
Glyma01g35280	Glyma01g35280	Glyma01g35280	Gm01:47816224-47821828	14-7-0	14-7-14	OK	35.1801	20.8101	-0.757473	1.04957	0.293916	0.625384	no
Glyma01g35291	Glyma01g35291	Glyma01g35291	Gm01:47825541-47831516	14-7-0	14-7-14	OK	2.32823	1.40306	-0.730653	0.833269	0.404693	0.724642	no
Glyma01g35300	Glyma01g35300	Glyma01g35300	Gm01:47832148-47834125	14-7-0	14-7-14	OK	4.30608	4.7017	0.126806	-0.1606	0.872408	0.961129	no
Glyma01g35310	Glyma01g35310	Glyma01g35310	Gm01:47838176-47839418	14-7-0	14-7-14	NOTEST	0.0944417	0.153748	0.703071	-0.481565	0.630115	1	no
Glyma01g35315	Glyma01g35315	Glyma01g35315	Gm01:47840273-47842107	14-7-0	14-7-14	NOTEST	0	0	0	0	1	1	no
Glyma01g35320	Glyma01g35320	Glyma01g35320	Gm01:47843480-47846444	14-7-0	14-7-14	OK	10.2475	16.2623	0.666258	-0.936699	0.348913	0.677785	no
Glyma01g35330	Glyma01g35330	Glyma01g35330	Gm01:47852135-47854503	14-7-0	14-7-14	OK	6.30428	2.71644	-1.21461	1.63447	0.102161	0.359127	no
Glyma01g35360	Glyma01g35360	Glyma01g35360	Gm01:47868564-47871498	14-7-0	14-7-14	OK	26.9867	20.8581	-0.371637	0.512822	0.608076	0.850152	no
Glyma01g35370	Glyma01g35370	Glyma01g35370	Gm01:47876579-47879048	14-7-0	14-7-14	OK	3.89461	6.35381	0.706142	-0.96971	0.332191	0.662377	no
Glyma01g35381	Glyma01g35381	Glyma01g35381	Gm01:47882778-47885490	14-7-0	14-7-14	OK	13.9564	8.54976	-0.706966	0.903012	0.366519	0.692453	no
Glyma01g35390	Glyma01g35390	Glyma01g35390	Gm01:47891482-47901268	14-7-0	14-7-14	OK	12.1888	22.6937	0.89674	-1.20339	0.228827	0.55301	no
Glyma01g35400	Glyma01g35400	Glyma01g35400	Gm01:47904409-47909019	14-7-0	14-7-14	OK	1.252	2.10072	0.746647	-0.829474	0.406836	0.726058	no
Glyma01g35410	Glyma01g35410	Glyma01g35410	Gm01:47910023-47911708	14-7-0	14-7-14	NOTEST	0	0.217379	1.79769e+308	1.79769e+308	0.047229	1	no
Glyma01g35420	Glyma01g35420	Glyma01g35420	Gm01:47912898-47913228	14-7-0	14-7-14	NOTEST	0	0	0	0	1	1	no
Glyma01g35430	Glyma01g35430	Glyma01g35430	Gm01:47926149-47931104	14-7-0	14-7-14	NOTEST	0.167724	0.151925	-0.142725	0.112111	0.910735	1	no
Glyma01g35440	Glyma01g35440	Glyma01g35440	Gm01:47932186-47933647	14-7-0	14-7-14	NOTEST	0	0	0	0	1	1	no
Glyma01g35450	Glyma01g35450	Glyma01g35450	Gm01:47933912-47939040	14-7-0	14-7-14	OK	22.679	6.2908	-1.85004	2.54934	0.0107928	0.100669	no
Glyma01g35460	Glyma01g35460	Glyma01g35460	Gm01:47946562-47947368	14-7-0	14-7-14	OK	3.78422	1.42621	-1.40781	1.38208	0.166947	0.471048	no
Glyma01g35470	Glyma01g35470	Glyma01g35470	Gm01:47950106-47953985	14-7-0	14-7-14	OK	1.08119	1.15514	0.095439	-0.0894071	0.928758	0.978076	no
Glyma01g35480	Glyma01g35480	Glyma01g35480	Gm01:47964085-47972060	14-7-0	14-7-14	OK	3.10678	6.82862	1.13617	-1.1673	0.243089	0.570596	no
Glyma01g35490	Glyma01g35490	Glyma01g35490	Gm01:47975124-47980649	14-7-0	14-7-14	OK	3.68141	3.33364	-0.143163	0.1987	0.842497	0.950928	no
Glyma01g35500	Glyma01g35500	Glyma01g35500	Gm01:47984869-47990016	14-7-0	14-7-14	OK	0.487642	0.586007	0.265096	-0.251259	0.801614	0.935911	no
Glyma01g35510	Glyma01g35510	Glyma01g35510	Gm01:47990548-47991258	14-7-0	14-7-14	OK	3.12356	1.43567	-1.12147	1.03348	0.301382	0.632677	no
Glyma01g35530	Glyma01g35530	Glyma01g35530	Gm01:48002890-48006714	14-7-0	14-7-14	NOTEST	0.17447	0.41823	1.26132	-1.05389	0.291932	1	no
Glyma01g35540	Glyma01g35540	Glyma01g35540	Gm01:48012025-48020478	14-7-0	14-7-14	OK	1.11625	2.71991	1.2849	-1.48363	0.137908	0.424792	no
Glyma01g35551	Glyma01g35551	Glyma01g35551	Gm01:48045791-48046532	14-7-0	14-7-14	NOTEST	0	0.334041	1.79769e+308	1.79769e+308	0.0777245	1	no
Glyma01g35561	Glyma01g35561	Glyma01g35561	Gm01:48046627-48048949	14-7-0	14-7-14	NOTEST	0	0.463092	1.79769e+308	1.79769e+308	0.0317346	1	no
Glyma01g35570	Glyma01g35570	Glyma01g35570	Gm01:48069521-48070621	14-7-0	14-7-14	OK	1.68547	1.89961	0.172546	-0.166075	0.868098	0.960278	no
Glyma01g35580	Glyma01g35580	Glyma01g35580	Gm01:48077865-48083725	14-7-0	14-7-14	OK	1.92828	0.277841	-2.79498	2.63517	0.00840953	0.0866509	no
Glyma01g35590	Glyma01g35590	Glyma01g35590	Gm01:48086193-48086883	14-7-0	14-7-14	OK	0	0.88339	1.79769e+308	1.79769e+308	0.0387823	0.207415	no
Glyma01g35600	Glyma01g35600	Glyma01g35600	Gm01:48088646-48092573	14-7-0	14-7-14	OK	2.88735	5.54549	0.941567	-1.13357	0.256976	0.586906	no
Glyma01g35611	Glyma01g35611	Glyma01g35611	Gm01:48106435-48107149	14-7-0	14-7-14	NOTEST	0	0	0	0	1	1	no
Glyma01g35620	Glyma01g35620	Glyma01g35620	Gm01:48132072-48139955	14-7-0	14-7-14	OK	27.827	32.5447	0.225937	-0.275749	0.782741	0.928501	no
Glyma01g35630	Glyma01g35630	Glyma01g35630	Gm01:48142117-48144321	14-7-0	14-7-14	OK	0.0728157	0.672442	3.20709	-2.3689	0.0178409	0.136512	no
Glyma01g35640	Glyma01g35640	Glyma01g35640	Gm01:48145384-48152470	14-7-0	14-7-14	OK	1.54611	0.982799	-0.653675	0.724995	0.468455	0.770347	no
Glyma01g35650	Glyma01g35650	Glyma01g35650	Gm01:48157272-48165868	14-7-0	14-7-14	OK	6.06538	2.04995	-1.56501	2.15351	0.0312787	0.186119	no
Glyma01g35660	Glyma01g35660	Glyma01g35660	Gm01:48174704-48177832	14-7-0	14-7-14	OK	0.988562	2.31413	1.22706	-1.27093	0.203752	0.523099	no
Glyma01g35671	Glyma01g35671	Glyma01g35671	Gm01:48220843-48221643	14-7-0	14-7-14	OK	81.2886	11.0574	-2.87804	3.68684	0.000227059	0.00751571	yes
Glyma01g35681	Glyma01g35681	Glyma01g35681	Gm01:48221730-48222524	14-7-0	14-7-14	NOTEST	0.212256	0	-1.79769e+308	-1.79769e+308	0.0965277	1	no
Glyma01g35690	Glyma01g35690	Glyma01g35690	Gm01:48227988-48235632	14-7-0	14-7-14	OK	0.513954	1.60723	1.64487	-1.72021	0.0853951	0.324277	no
Glyma01g35700	Glyma01g35700	Glyma01g35700	Gm01:48235761-48238962	14-7-0	14-7-14	NOTEST	0.147969	0.0223227	-2.72872	1.73071	0.083503	1	no
Glyma01g35711	Glyma01g35711	Glyma01g35711	Gm01:48242478-48244212	14-7-0	14-7-14	NOTEST	0	0	0	0	1	1	no
Glyma01g35720	Glyma01g35720	Glyma01g35720	Gm01:48246126-48248948	14-7-0	14-7-14	NOTEST	0	0	0	0	1	1	no
Glyma01g35730	Glyma01g35730	Glyma01g35730	Gm01:48251598-48253821	14-7-0	14-7-14	OK	1.37308	0.595833	-1.20444	1.10534	0.269012	0.600003	no
Glyma01g35740	Glyma01g35740	Glyma01g35740	Gm01:48256233-48258418	14-7-0	14-7-14	OK	1.74034	2.16882	0.317539	-0.32712	0.743577	0.912583	no
Glyma01g35750	Glyma01g35750	Glyma01g35750	Gm01:48262136-48265375	14-7-0	14-7-14	OK	11.4418	13.6098	0.250335	-0.356164	0.721717	0.903923	no
Glyma01g35780	Glyma01g35780	Glyma01g35780	Gm01:48276784-48278711	14-7-0	14-7-14	OK	16.9979	8.56283	-0.989201	1.28301	0.199488	0.51788	no
Glyma01g35790	Glyma01g35790	Glyma01g35790	Gm01:48279936-48284217	14-7-0	14-7-14	OK	6.42322	6.73773	0.0689655	-0.0982006	0.921773	0.976409	no
Glyma01g35800	Glyma01g35800	Glyma01g35800	Gm01:48289113-48292398	14-7-0	14-7-14	OK	0.1901	0.844596	2.15151	-2.02335	0.0430372	0.219352	no
Glyma01g35820	Glyma01g35820	Glyma01g35820	Gm01:48321786-48329293	14-7-0	14-7-14	OK	1.66821	2.02037	0.276321	-0.341616	0.73264	0.908521	no
Glyma01g35830	Glyma01g35830	Glyma01g35830	Gm01:48330613-48331119	14-7-0	14-7-14	NOTEST	0	0.282891	1.79769e+308	1.79769e+308	0.223676	1	no
Glyma01g35840	Glyma01g35840	Glyma01g35840	Gm01:48332060-48333217	14-7-0	14-7-14	OK	3.73247	2.07266	-0.848648	0.908451	0.36364	0.689863	no
Glyma01g35850	Glyma01g35850	Glyma01g35850	Gm01:48334976-48338851	14-7-0	14-7-14	OK	3.78491	5.74882	0.603006	-0.851053	0.39474	0.71668	no
Glyma01g35880	Glyma01g35880	Glyma01g35880	Gm01:48348796-48349428	14-7-0	14-7-14	NOTEST	0	0	0	0	1	1	no
Glyma01g35910	Glyma01g35910	Glyma01g35910	Gm01:48361827-48364787	14-7-0	14-7-14	OK	150.677	101.557	-0.569162	0.532089	0.594664	0.843593	no
Glyma01g35920	Glyma01g35920	Glyma01g35920	Gm01:48373909-48375181	14-7-0	14-7-14	OK	3.41363	2.27731	-0.583977	0.658977	0.50991	0.796085	no
Glyma01g35931	Glyma01g35931	Glyma01g35931	Gm01:48376295-48378301	14-7-0	14-7-14	NOTEST	0	0	0	0	1	1	no
Glyma01g35940	Glyma01g35940	Glyma01g35940	Gm01:48378830-48383355	14-7-0	14-7-14	OK	1.53204	3.02863	0.983211	-1.2253	0.220461	0.544122	no
Glyma01g35950	Glyma01g35950	Glyma01g35950	Gm01:48392038-48401536	14-7-0	14-7-14	OK	1.89023	4.49197	1.24879	-1.74848	0.0803807	0.312822	no
Glyma01g35960	Glyma01g35960	Glyma01g35960	Gm01:48412616-48415065	14-7-0	14-7-14	NOTEST	0	0.110529	1.79769e+308	1.79769e+308	0.0777245	1	no
Glyma01g35970	Glyma01g35970	Glyma01g35970	Gm01:48419129-48422033	14-7-0	14-7-14	NOTEST	0	0	0	0	1	1	no
Glyma01g35980	Glyma01g35980	Glyma01g35980	Gm01:48422961-48427391	14-7-0	14-7-14	OK	1.06037	1.72676	0.703507	-0.820297	0.412047	0.730203	no
Glyma01g35990	Glyma01g35990	Glyma01g35990	Gm01:48439916-48441659	14-7-0	14-7-14	OK	2.80777	3.79105	0.433174	-0.507562	0.611761	0.852425	no
Glyma01g36000	Glyma01g36000	Glyma01g36000	Gm01:48442886-48447854	14-7-0	14-7-14	OK	0.312047	4.4313	3.82789	-4.19345	2.7475e-05	0.00157911	yes
Glyma01g36011	Glyma01g36011	Glyma01g36011	Gm01:48469240-48475758	14-7-0	14-7-14	OK	2.76084	2.61611	-0.0776833	0.0925946	0.926226	0.977547	no
Glyma01g36021	Glyma01g36021	Glyma01g36021	Gm01:48476497-48478317	14-7-0	14-7-14	NOTEST	0	0	0	0	1	1	no
Glyma01g36030	Glyma01g36030	Glyma01g36030	Gm01:48481465-48486456	14-7-0	14-7-14	OK	5.46336	6.05184	0.147585	-0.173799	0.862023	0.958087	no
Glyma01g36040	Glyma01g36040	Glyma01g36040	Gm01:48503695-48509106	14-7-0	14-7-14	OK	1.37713	2.90213	1.07545	-1.31794	0.187522	0.50204	no
Glyma01g36050	Glyma01g36050	Glyma01g36050	Gm01:48515192-48516090	14-7-0	14-7-14	NOTEST	0.137286	0.0463511	-1.56651	0.712519	0.476143	1	no
Glyma01g36070	Glyma01g36070	Glyma01g36070	Gm01:48524087-48529043	14-7-0	14-7-14	OK	8.2554	8.01261	-0.0430653	0.0612943	0.951125	0.986102	no
Glyma01g36080	Glyma01g36080	Glyma01g36080	Gm01:48537766-48542585	14-7-0	14-7-14	OK	1.71179	5.6547	1.72395	-2.19347	0.0282738	0.176896	no
Glyma01g36091	Glyma01g36091	Glyma01g36091	Gm01:48559460-48570512	14-7-0	14-7-14	OK	0.610418	0.787938	0.368283	-0.346369	0.729066	0.906599	no
Glyma01g36101	Glyma01g36101	Glyma01g36101	Gm01:48579414-48580534	14-7-0	14-7-14	NOTEST	0	0	0	0	1	1	no
Glyma01g36110	Glyma01g36110	Glyma01g36110	Gm01:48584816-48588333	14-7-0	14-7-14	OK	6.37767	14.4329	1.17826	-1.63323	0.102421	0.359769	no
Glyma01g36120	Glyma01g36120	Glyma01g36120	Gm01:48599418-48603933	14-7-0	14-7-14	OK	3.92144	5.18014	0.401607	-0.518493	0.604115	0.848012	no
Glyma01g36130	Glyma01g36130	Glyma01g36130	Gm01:48622283-48624709	14-7-0	14-7-14	NOTEST	0	0	0	0	1	1	no
Glyma01g36145	Glyma01g36145	Glyma01g36145	Gm01:48632045-48636339	14-7-0	14-7-14	OK	0.657207	2.49152	1.92261	-1.98024	0.0476761	0.232302	no
Glyma01g36160	Glyma01g36160	Glyma01g36160	Gm01:48651554-48653174	14-7-0	14-7-14	OK	3.59055	16.5997	2.20888	-2.8988	0.00374592	0.0522623	no
Glyma01g36170	Glyma01g36170	Glyma01g36170	Gm01:48661585-48668062	14-7-0	14-7-14	OK	6.47811	6.63886	0.0353622	-0.050266	0.95991	0.989221	no
Glyma01g36180	Glyma01g36180	Glyma01g36180	Gm01:48677503-48687090	14-7-0	14-7-14	OK	2.23249	3.22125	0.528969	-0.567699	0.570239	0.830177	no
Glyma01g36190	Glyma01g36190	Glyma01g36190	Gm01:48690497-48697620	14-7-0	14-7-14	NOTEST	0	0.0214678	1.79769e+308	1.79769e+308	0.337108	1	no
Glyma01g36200	Glyma01g36200	Glyma01g36200	Gm01:48703010-48710116	14-7-0	14-7-14	OK	6.4435	6.21866	-0.0512416	0.0728425	0.941931	0.982954	no
Glyma01g36210	Glyma01g36210	Glyma01g36210	Gm01:48710853-48716254	14-7-0	14-7-14	OK	25.7803	22.8171	-0.176154	0.186756	0.851852	0.954512	no
Glyma01g36225	Glyma01g36225	Glyma01g36225	Gm01:48732011-48735191	14-7-0	14-7-14	OK	1.41043	0.772021	-0.869424	0.904418	0.365774	0.691719	no
Glyma01g36240	Glyma01g36240	Glyma01g36240	Gm01:48735796-48738228	14-7-0	14-7-14	OK	0.616837	0.510098	-0.274116	0.2681	0.788623	0.930296	no
Glyma01g36250	Glyma01g36250	Glyma01g36250	Gm01:48740116-48740919	14-7-0	14-7-14	OK	2.15569	0.265495	-3.0214	2.25286	0.024268	0.163742	no
Glyma01g36260	Glyma01g36260	Glyma01g36260	Gm01:48742924-48747330	14-7-0	14-7-14	OK	0.940595	2.20917	1.23186	-1.41174	0.158027	0.457261	no
Glyma01g36270	Glyma01g36270	Glyma01g36270	Gm01:48751691-48754081	14-7-0	14-7-14	OK	8.66654	5.42853	-0.674894	0.954522	0.33982	0.66932	no
Glyma01g36280	Glyma01g36280	Glyma01g36280	Gm01:48755468-48766262	14-7-0	14-7-14	OK	2.19264	1.66143	-0.400244	0.512221	0.608497	0.850377	no
Glyma01g36290	Glyma01g36290	Glyma01g36290	Gm01:48768219-48769858	14-7-0	14-7-14	OK	12.0115	4.94077	-1.28161	1.47806	0.139391	0.427341	no
Glyma01g36301	Glyma01g36301	Glyma01g36301	Gm01:48784769-48791019	14-7-0	14-7-14	OK	0.023442	3.27576	7.12659	-5.4627	4.68941e-08	1.09321e-05	yes
Glyma01g36311	Glyma01g36311	Glyma01g36311	Gm01:48803722-48809885	14-7-0	14-7-14	NOTEST	0.0635059	0.023583	-1.42914	0.65004	0.515667	1	no
Glyma01g36320	Glyma01g36320	Glyma01g36320	Gm01:48810062-48812413	14-7-0	14-7-14	OK	2.79446	4.47444	0.679137	-0.615799	0.538027	0.811582	no
Glyma01g36330	Glyma01g36330	Glyma01g36330	Gm01:48812789-48816606	14-7-0	14-7-14	NOTEST	0.115644	0	-1.79769e+308	-1.79769e+308	0.0965277	1	no
Glyma01g36340	Glyma01g36340	Glyma01g36340	Gm01:48817174-48822812	14-7-0	14-7-14	OK	5.77111	5.41135	-0.0928601	0.131779	0.895159	0.968032	no
Glyma01g36350	Glyma01g36350	Glyma01g36350	Gm01:48822940-48825606	14-7-0	14-7-14	OK	0.333148	0.503877	0.59691	-0.56128	0.574606	0.833356	no
Glyma01g36360	Glyma01g36360	Glyma01g36360	Gm01:48830588-48836103	14-7-0	14-7-14	OK	0.168634	0.543686	1.68888	-1.43146	0.152299	0.448384	no
Glyma01g36375	Glyma01g36375	Glyma01g36375	Gm01:48848060-48848643	14-7-0	14-7-14	NOTEST	0	0	0	0	1	1	no
Glyma01g36390	Glyma01g36390	Glyma01g36390	Gm01:48865791-48875859	14-7-0	14-7-14	OK	0.510119	2.72658	2.41819	-2.66734	0.00764549	0.0817093	no
Glyma01g36410	Glyma01g36410	Glyma01g36410	Gm01:48903092-48909719	14-7-0	14-7-14	OK	13.0401	20.6683	0.664464	-0.897261	0.36958	0.695487	no
Glyma01g36420	Glyma01g36420	Glyma01g36420	Gm01:48925196-48933027	14-7-0	14-7-14	OK	2.17404	1.43145	-0.6029	0.743359	0.457264	0.762916	no
Glyma01g36430	Glyma01g36430	Glyma01g36430	Gm01:48939588-48943055	14-7-0	14-7-14	NOTEST	0.283345	0.463669	0.710535	-0.6337	0.526276	1	no
Glyma01g36440	Glyma01g36440	Glyma01g36440	Gm01:48945635-48947617	14-7-0	14-7-14	OK	10.5471	24.6605	1.22535	-1.6701	0.0948991	0.344411	no
Glyma01g36450	Glyma01g36450	Glyma01g36450	Gm01:48961667-48971891	14-7-0	14-7-14	OK	5.48363	5.04477	-0.120341	0.170704	0.864456	0.958985	no
Glyma01g36460	Glyma01g36460	Glyma01g36460	Gm01:48974134-48978029	14-7-0	14-7-14	NOTEST	0	0	0	0	1	1	no
Glyma01g36480	Glyma01g36480	Glyma01g36480	Gm01:48987938-48990441	14-7-0	14-7-14	OK	1.32198	16.4148	3.63422	-4.08669	4.37568e-05	0.00224644	yes
Glyma01g36490	Glyma01g36490	Glyma01g36490	Gm01:48994357-48995257	14-7-0	14-7-14	NOTEST	0	0	0	0	1	1	no
Glyma01g36500	Glyma01g36500	Glyma01g36500	Gm01:48997060-49003679	14-7-0	14-7-14	NOTEST	0.372994	0.166123	-1.1669	0.994827	0.31982	1	no
Glyma01g36510	Glyma01g36510	Glyma01g36510	Gm01:49007099-49008173	14-7-0	14-7-14	NOTEST	0.111114	0	-1.79769e+308	-1.79769e+308	0.0965277	1	no
Glyma01g36520	Glyma01g36520	Glyma01g36520	Gm01:49010426-49011305	14-7-0	14-7-14	NOTEST	0	0	0	0	1	1	no
Glyma01g36530	Glyma01g36530	Glyma01g36530	Gm01:49013986-49014688	14-7-0	14-7-14	NOTEST	0	0	0	0	1	1	no
Glyma01g36545	Glyma01g36545	Glyma01g36545	Gm01:49022248-49027494	14-7-0	14-7-14	NOTEST	0	0	0	0	1	1	no
Glyma01g36560	Glyma01g36560	Glyma01g36560	Gm01:49029694-49030771	14-7-0	14-7-14	NOTEST	0	0.103815	1.79769e+308	1.79769e+308	0.0940746	1	no
Glyma01g36570	Glyma01g36570	Glyma01g36570	Gm01:49038832-49039771	14-7-0	14-7-14	NOTEST	0	0.0394759	1.79769e+308	1.79769e+308	0.223676	1	no
Glyma01g36580	Glyma01g36580	Glyma01g36580	Gm01:49043808-49044992	14-7-0	14-7-14	NOTEST	0	0	0	0	1	1	no
Glyma01g36590	Glyma01g36590	Glyma01g36590	Gm01:49051914-49056921	14-7-0	14-7-14	OK	0.312423	1.65112	2.40187	-2.41966	0.015535	0.125535	no
Glyma01g36600	Glyma01g36600	Glyma01g36600	Gm01:49064175-49066310	14-7-0	14-7-14	OK	3.20497	4.39736	0.456327	-0.546218	0.584916	0.83919	no
Glyma01g36606	Glyma01g36606	Glyma01g36606	Gm01:49068914-49070036	14-7-0	14-7-14	OK	1.15059	1.19812	0.0583932	-0.056743	0.95475	0.987112	no
Glyma01g36613	Glyma01g36613	Glyma01g36613	Gm01:49070073-49072214	14-7-0	14-7-14	OK	0.966637	1.31826	0.447591	-0.426392	0.669822	0.880537	no
Glyma01g36620	Glyma01g36620	Glyma01g36620	Gm01:49074667-49077300	14-7-0	14-7-14	OK	212.8	145.637	-0.547119	0.592939	0.553222	0.820716	no
Glyma01g36630	Glyma01g36630	Glyma01g36630	Gm01:49084944-49093758	14-7-0	14-7-14	OK	2.07092	2.2643	0.128796	-0.160075	0.872822	0.961333	no
Glyma01g36638	Glyma01g36638	Glyma01g36638	Gm01:49107386-49109822	14-7-0	14-7-14	OK	6.89509	17.1291	1.31281	-1.78433	0.07437	0.299296	no
Glyma01g36646	Glyma01g36646	Glyma01g36646	Gm01:49109982-49111565	14-7-0	14-7-14	OK	3.62111	12.6172	1.80089	-1.89576	0.0579914	0.259544	no
Glyma01g36654	Glyma01g36654	Glyma01g36654	Gm01:49113570-49119201	14-7-0	14-7-14	OK	4.15802	4.81855	0.212701	-0.141166	0.887739	0.965161	no
Glyma01g36662	Glyma01g36662	Glyma01g36662	Gm01:49119339-49122865	14-7-0	14-7-14	OK	12.9045	13.068	0.0181646	-0.0254843	0.979669	0.994122	no
Glyma01g36670	Glyma01g36670	Glyma01g36670	Gm01:49124364-49127508	14-7-0	14-7-14	OK	6.4083	14.4071	1.16877	-1.34751	0.177816	0.487969	no
Glyma01g36680	Glyma01g36680	Glyma01g36680	Gm01:49129327-49137766	14-7-0	14-7-14	OK	2.99173	2.95951	-0.0156189	0.0217238	0.982668	0.994914	no
Glyma01g36691	Glyma01g36691	Glyma01g36691	Gm01:49144740-49145859	14-7-0	14-7-14	NOTEST	0	0.28507	1.79769e+308	1.79769e+308	0.0777245	1	no
Glyma01g36700	Glyma01g36700	Glyma01g36700	Gm01:49146933-49155639	14-7-0	14-7-14	OK	5.14522	11.9349	1.21389	-1.4461	0.14815	0.441564	no
Glyma01g36711	Glyma01g36711	Glyma01g36711	Gm01:49159187-49159524	14-7-0	14-7-14	OK	0	0.815852	1.79769e+308	1.79769e+308	0.141284	0.4299	no
Glyma01g36720	Glyma01g36720	Glyma01g36720	Gm01:49164706-49167830	14-7-0	14-7-14	OK	0.106213	2.20496	4.37572	-3.36037	0.000778372	0.0179641	yes
Glyma01g36730	Glyma01g36730	Glyma01g36730	Gm01:49171301-49172211	14-7-0	14-7-14	OK	0.906793	0.726707	-0.319399	0.281325	0.778461	0.927027	no
Glyma01g36740	Glyma01g36740	Glyma01g36740	Gm01:49175886-49179312	14-7-0	14-7-14	OK	12.8411	12.0634	-0.0901318	0.128275	0.897932	0.969112	no
Glyma01g36750	Glyma01g36750	Glyma01g36750	Gm01:49180569-49188788	14-7-0	14-7-14	OK	5.68779	21.422	1.91315	-2.55434	0.010639	0.0999503	no
Glyma01g36760	Glyma01g36760	Glyma01g36760	Gm01:49196842-49199569	14-7-0	14-7-14	OK	1.94312	5.40737	1.47655	-1.41723	0.156417	0.454918	no
Glyma01g36770	Glyma01g36770	Glyma01g36770	Gm01:49207142-49211246	14-7-0	14-7-14	OK	1.68161	11.2422	2.741	-2.94152	0.00326604	0.0475578	yes
Glyma01g36780	Glyma01g36780	Glyma01g36780	Gm01:49213870-49215923	14-7-0	14-7-14	OK	5.27388	7.89925	0.582852	-0.689547	0.490479	0.784921	no
Glyma01g36790	Glyma01g36790	Glyma01g36790	Gm01:49215924-49218539	14-7-0	14-7-14	OK	4.96936	2.32746	-1.09431	0.994987	0.319743	0.651011	no
Glyma01g36801	Glyma01g36801	Glyma01g36801	Gm01:49220679-49225998	14-7-0	14-7-14	OK	5.4134	4.13815	-0.38755	0.548692	0.583217	0.838322	no
Glyma01g36810	Glyma01g36810	Glyma01g36810	Gm01:49235149-49235590	14-7-0	14-7-14	NOTEST	0	0	0	0	1	1	no
Glyma01g36820	Glyma01g36820	Glyma01g36820	Gm01:49253297-49254542	14-7-0	14-7-14	NOTEST	0.112073	0.291409	1.37861	-0.954198	0.339983	1	no
Glyma01g36831	Glyma01g36831	Glyma01g36831	Gm01:49256521-49258723	14-7-0	14-7-14	OK	2.42627	1.79043	-0.438434	0.478678	0.632168	0.862219	no
Glyma01g36840	Glyma01g36840	Glyma01g36840	Gm01:49263069-49265363	14-7-0	14-7-14	OK	3.06859	3.68518	0.264159	-0.357884	0.72043	0.903279	no
Glyma01g36850	Glyma01g36850	Glyma01g36850	Gm01:49266433-49268941	14-7-0	14-7-14	OK	57.2039	62.1439	0.119497	-0.154068	0.877557	0.962721	no
Glyma01g36860	Glyma01g36860	Glyma01g36860	Gm01:49271742-49278414	14-7-0	14-7-14	OK	2.65171	4.14667	0.64503	-0.810527	0.417637	0.734477	no
Glyma01g36870	Glyma01g36870	Glyma01g36870	Gm01:49289720-49299050	14-7-0	14-7-14	OK	6.3887	7.09263	0.150797	-0.214096	0.830472	0.946469	no
Glyma01g36880	Glyma01g36880	Glyma01g36880	Gm01:49300170-49302868	14-7-0	14-7-14	OK	16.6094	21.4732	0.370537	-0.464274	0.642451	0.867084	no
Glyma01g36890	Glyma01g36890	Glyma01g36890	Gm01:49306067-49309782	14-7-0	14-7-14	OK	34.5233	26.8791	-0.361085	0.478742	0.632122	0.862219	no
Glyma01g36900	Glyma01g36900	Glyma01g36900	Gm01:49311611-49314379	14-7-0	14-7-14	NOTEST	0.0894987	0.460377	2.36288	-1.70495	0.088204	1	no
Glyma01g36920	Glyma01g36920	Glyma01g36920	Gm01:49322909-49327222	14-7-0	14-7-14	NOTEST	0	0.0106846	1.79769e+308	1.79769e+308	0.223676	1	no
Glyma01g36931	Glyma01g36931	Glyma01g36931	Gm01:49327330-49331955	14-7-0	14-7-14	NOTEST	0	0.151341	1.79769e+308	1.79769e+308	0.0940746	1	no
Glyma01g36940	Glyma01g36940	Glyma01g36940	Gm01:49334742-49338803	14-7-0	14-7-14	OK	0.16953	1.34249	2.9853	-2.50096	0.0123856	0.109472	no
Glyma01g36950	Glyma01g36950	Glyma01g36950	Gm01:49340202-49347954	14-7-0	14-7-14	NOTEST	0.295739	0.0708531	-2.06142	1.79185	0.0731576	1	no
Glyma01g36960	Glyma01g36960	Glyma01g36960	Gm01:49357372-49363143	14-7-0	14-7-14	OK	1.26879	4.83033	1.92867	-2.36211	0.0181714	0.137983	no
Glyma01g36980	Glyma01g36980	Glyma01g36980	Gm01:49366425-49374835	14-7-0	14-7-14	NOTEST	0	0.0102091	1.79769e+308	1.79769e+308	0.223676	1	no
Glyma01g36990	Glyma01g36990	Glyma01g36990	Gm01:49378227-49384148	14-7-0	14-7-14	OK	13.8054	10.231	-0.432289	0.560415	0.575196	0.833716	no
Glyma01g37000	Glyma01g37000	Glyma01g37000	Gm01:49386620-49392224	14-7-0	14-7-14	NOTEST	0.0993684	0.192885	0.956879	-0.662402	0.507714	1	no
Glyma01g37010	Glyma01g37010	Glyma01g37010	Gm01:49392804-49394717	14-7-0	14-7-14	OK	15.3145	6.14488	-1.31744	1.77561	0.0757971	0.302855	no
Glyma01g37020	Glyma01g37020	Glyma01g37020	Gm01:49402192-49404630	14-7-0	14-7-14	OK	15.4237	23.4563	0.604822	-0.82842	0.407432	0.726337	no
Glyma01g37031	Glyma01g37031	Glyma01g37031	Gm01:49405105-49407262	14-7-0	14-7-14	NOTEST	0	0.034301	1.79769e+308	1.79769e+308	0.223676	1	no
Glyma01g37040	Glyma01g37040	Glyma01g37040	Gm01:49421021-49423263	14-7-0	14-7-14	OK	0.908288	0.324011	-1.48711	1.37555	0.16896	0.474455	no
Glyma01g37051	Glyma01g37051	Glyma01g37051	Gm01:49432478-49435070	14-7-0	14-7-14	NOTEST	0	0	0	0	1	1	no
Glyma01g37060	Glyma01g37060	Glyma01g37060	Gm01:49439171-49440019	14-7-0	14-7-14	NOTEST	0	0	0	0	1	1	no
Glyma01g37080	Glyma01g37080	Glyma01g37080	Gm01:49455121-49457778	14-7-0	14-7-14	OK	3.33112	1.97847	-0.75162	1.01189	0.311589	0.64322	no
Glyma01g37090	Glyma01g37090	Glyma01g37090	Gm01:49471613-49473084	14-7-0	14-7-14	OK	21.8813	18.2975	-0.258051	0.363543	0.7162	0.901349	no
Glyma01g37100	Glyma01g37100	Glyma01g37100	Gm01:49482623-49488331	14-7-0	14-7-14	OK	2.55346	2.36333	-0.111634	0.140692	0.888113	0.965237	no
Glyma01g37120	Glyma01g37120	Glyma01g37120	Gm01:49513343-49516212	14-7-0	14-7-14	NOTEST	0	0	0	0	1	1	no
Glyma01g37130	Glyma01g37130	Glyma01g37130	Gm01:49518056-49520062	14-7-0	14-7-14	NOTEST	0.0732849	0.130613	0.833711	-0.563748	0.572925	1	no
Glyma01g37136	Glyma01g37136	Glyma01g37136	Gm01:49520615-49552178	14-7-0	14-7-14	OK	2.65173	4.37274	0.721602	-0.953186	0.340496	0.669835	no
Glyma01g37143	Glyma01g37143	Glyma01g37143	Gm01:49520615-49552178	14-7-0	14-7-14	NOTEST	0.196007	0	-1.79769e+308	-1.79769e+308	0.441822	1	no
Glyma01g37150	Glyma01g37150	Glyma01g37150	Gm01:49557207-49558582	14-7-0	14-7-14	NOTEST	0	0.264105	1.79769e+308	1.79769e+308	0.052544	1	no
Glyma01g37160	Glyma01g37160	Glyma01g37160	Gm01:49559523-49562407	14-7-0	14-7-14	OK	5.8397	4.90185	-0.25257	0.315051	0.752723	0.916706	no
Glyma01g37180	Glyma01g37180	Glyma01g37180	Gm01:49563492-49567476	14-7-0	14-7-14	OK	9.10009	5.139	-0.824394	1.14262	0.253197	0.582454	no
Glyma01g37190	Glyma01g37190	Glyma01g37190	Gm01:49585069-49586870	14-7-0	14-7-14	NOTEST	0	0	0	0	1	1	no
Glyma01g37200	Glyma01g37200	Glyma01g37200	Gm01:49597448-49598567	14-7-0	14-7-14	OK	0.156389	0.884732	2.5001	-1.82005	0.0687513	0.285285	no
Glyma01g37215	Glyma01g37215	Glyma01g37215	Gm01:49610632-49612072	14-7-0	14-7-14	NOTEST	0.0726681	0.0266392	-1.44777	0.521928	0.60172	1	no
Glyma01g37230	Glyma01g37230	Glyma01g37230	Gm01:49610632-49612072	14-7-0	14-7-14	NOTEST	0	0	0	0	1	1	no
Glyma01g37240	Glyma01g37240	Glyma01g37240	Gm01:49616496-49621295	14-7-0	14-7-14	OK	0.250729	0.701573	1.48446	-1.37846	0.168063	0.472789	no
Glyma01g37250	Glyma01g37250	Glyma01g37250	Gm01:49624839-49626433	14-7-0	14-7-14	OK	126.065	31.9644	-1.97963	2.41035	0.0159372	0.127531	no
Glyma01g37270	Glyma01g37270	Glyma01g37270	Gm01:49637622-49639519	14-7-0	14-7-14	OK	36.5499	52.4223	0.520313	-0.630964	0.528064	0.806436	no
Glyma01g37290	Glyma01g37290	Glyma01g37290	Gm01:49639992-49643961	14-7-0	14-7-14	OK	10.8337	7.67111	-0.49802	0.545944	0.585104	0.839266	no
Glyma01g37296	Glyma01g37296	Glyma01g37296	Gm01:49646115-49646903	14-7-0	14-7-14	OK	55.7291	173.095	1.63506	-2.2933	0.0218308	0.154129	no
Glyma01g37303	Glyma01g37303	Glyma01g37303	Gm01:49646973-49647556	14-7-0	14-7-14	OK	1.58096	0.137007	-3.52849	1.7039	0.088399	0.330806	no
Glyma01g37310	Glyma01g37310	Glyma01g37310	Gm01:49651805-49656854	14-7-0	14-7-14	OK	0.330182	0.593398	0.845738	-0.665268	0.505879	0.792971	no
Glyma01g37320	Glyma01g37320	Glyma01g37320	Gm01:49680382-49682445	14-7-0	14-7-14	OK	19.7233	25.2022	0.353644	-0.501289	0.616168	0.854751	no
Glyma01g37330	Glyma01g37330	Glyma01g37330	Gm01:49688213-49691604	14-7-0	14-7-14	NOTEST	0.103333	0.0725787	-0.509682	0.395968	0.692128	1	no
Glyma01g37341	Glyma01g37341	Glyma01g37341	Gm01:49698283-49706430	14-7-0	14-7-14	OK	3.80899	11.7835	1.62928	-2.08306	0.0372461	0.203417	no
Glyma01g37350	Glyma01g37350	Glyma01g37350	Gm01:49711599-49713520	14-7-0	14-7-14	NOTEST	0	0	0	0	1	1	no
Glyma01g37360	Glyma01g37360	Glyma01g37360	Gm01:49721188-49723541	14-7-0	14-7-14	OK	0.344875	12.9993	5.23621	-5.09053	3.5707e-07	5.5606e-05	yes
Glyma01g37370	Glyma01g37370	Glyma01g37370	Gm01:49725132-49728656	14-7-0	14-7-14	OK	50.7428	2.38101	-4.41356	5.29774	1.17244e-07	2.29595e-05	yes
Glyma01g37380	Glyma01g37380	Glyma01g37380	Gm01:49736248-49744811	14-7-0	14-7-14	OK	6.2817	4.8734	-0.366227	0.500283	0.616876	0.854889	no
Glyma01g37393	Glyma01g37393	Glyma01g37393	Gm01:49755262-49762118	14-7-0	14-7-14	OK	4.95271	5.90033	0.252578	-0.353695	0.723567	0.904457	no
Glyma01g37406	Glyma01g37406	Glyma01g37406	Gm01:49766181-49770448	14-7-0	14-7-14	OK	4.11288	6.82911	0.731549	-0.9447	0.344812	0.673766	no
Glyma01g37420	Glyma01g37420	Glyma01g37420	Gm01:49772165-49778547	14-7-0	14-7-14	OK	1.626	1.73216	0.0912466	-0.113283	0.909806	0.972454	no
Glyma01g37430	Glyma01g37430	Glyma01g37430	Gm01:49781351-49784822	14-7-0	14-7-14	OK	0.0726314	1.54814	4.41379	-3.79461	0.000147876	0.00554127	yes
Glyma01g37440	Glyma01g37440	Glyma01g37440	Gm01:49804689-49806831	14-7-0	14-7-14	NOTEST	0	0	0	0	1	1	no
Glyma01g37450	Glyma01g37450	Glyma01g37450	Gm01:49804689-49806831	14-7-0	14-7-14	OK	2.74267	5.00718	0.868419	-1.12989	0.258521	0.588707	no
Glyma01g37460	Glyma01g37460	Glyma01g37460	Gm01:49816977-49818918	14-7-0	14-7-14	OK	7.5443	9.73119	0.367229	-0.520047	0.60303	0.847756	no
Glyma01g37470	Glyma01g37470	Glyma01g37470	Gm01:49821773-49824393	14-7-0	14-7-14	NOTEST	0	0.141252	1.79769e+308	1.79769e+308	0.117177	1	no
Glyma01g37480	Glyma01g37480	Glyma01g37480	Gm01:49830529-49834966	14-7-0	14-7-14	OK	20.2984	25.9902	0.356604	-0.506149	0.612752	0.853006	no
Glyma01g37490	Glyma01g37490	Glyma01g37490	Gm01:49841544-49848877	14-7-0	14-7-14	OK	4.90927	3.7181	-0.400945	0.475302	0.634572	0.863187	no
Glyma01g37500	Glyma01g37500	Glyma01g37500	Gm01:49850120-49854265	14-7-0	14-7-14	OK	12.5624	8.96604	-0.486569	0.677567	0.498046	0.788097	no
Glyma01g37510	Glyma01g37510	Glyma01g37510	Gm01:49858452-49865847	14-7-0	14-7-14	OK	0.0954344	0.715562	2.9065	-2.42819	0.0151743	0.123845	no
Glyma01g37520	Glyma01g37520	Glyma01g37520	Gm01:49869523-49871376	14-7-0	14-7-14	OK	3.5265	2.16229	-0.705675	0.868226	0.385271	0.709272	no
Glyma01g37530	Glyma01g37530	Glyma01g37530	Gm01:49872196-49872388	14-7-0	14-7-14	NOTEST	0	0	0	0	1	1	no
Glyma01g37541	Glyma01g37541	Glyma01g37541	Gm01:49879281-49885195	14-7-0	14-7-14	OK	23.5873	58.0367	1.29896	-1.45442	0.145829	0.43777	no
Glyma01g37550	Glyma01g37550	Glyma01g37550	Gm01:49885628-49888995	14-7-0	14-7-14	OK	98.2953	102.419	0.059288	-0.0708203	0.943541	0.983478	no
Glyma01g37560	Glyma01g37560	Glyma01g37560	Gm01:49891280-49893312	14-7-0	14-7-14	OK	4.53675	8.11805	0.839473	-0.882185	0.377677	0.702647	no
Glyma01g37571	Glyma01g37571	Glyma01g37571	Gm01:49893933-49905366	14-7-0	14-7-14	NOTEST	0	0	0	0	1	1	no
Glyma01g37580	Glyma01g37580	Glyma01g37580	Gm01:49893933-49905366	14-7-0	14-7-14	OK	17.1514	15.1147	-0.182377	0.221074	0.825035	0.944254	no
Glyma01g37590	Glyma01g37590	Glyma01g37590	Gm01:49909450-49916251	14-7-0	14-7-14	OK	0.901253	0.452478	-0.994084	0.870101	0.384245	0.708288	no
Glyma01g37600	Glyma01g37600	Glyma01g37600	Gm01:49942124-49946080	14-7-0	14-7-14	NOTEST	0	0	0	0	1	1	no
Glyma01g37610	Glyma01g37610	Glyma01g37610	Gm01:49946274-49947782	14-7-0	14-7-14	OK	9.72078	6.5967	-0.559328	0.717874	0.472835	0.772905	no
Glyma01g37620	Glyma01g37620	Glyma01g37620	Gm01:49949013-49952809	14-7-0	14-7-14	OK	1.40488	1.23933	-0.180891	0.207688	0.835473	0.948532	no
Glyma01g37630	Glyma01g37630	Glyma01g37630	Gm01:49953469-49956749	14-7-0	14-7-14	NOTEST	0.0639896	0.0440032	-0.540228	0.310298	0.756335	1	no
Glyma01g37640	Glyma01g37640	Glyma01g37640	Gm01:49963812-49969112	14-7-0	14-7-14	NOTEST	0	0.0144804	1.79769e+308	1.79769e+308	0.223676	1	no
Glyma01g37650	Glyma01g37650	Glyma01g37650	Gm01:49975720-49977560	14-7-0	14-7-14	NOTEST	0	0.190008	1.79769e+308	1.79769e+308	0.0497016	1	no
Glyma01g37670	Glyma01g37670	Glyma01g37670	Gm01:49982520-49986256	14-7-0	14-7-14	OK	1.0248	3.7125	1.85705	-2.21511	0.0267524	0.171763	no
Glyma01g37675	Glyma01g37675	Glyma01g37675	Gm01:49992409-49993063	14-7-0	14-7-14	NOTEST	0	0	0	0	1	1	no
Glyma01g37680	Glyma01g37680	Glyma01g37680	Gm01:49999698-50001148	14-7-0	14-7-14	NOTEST	0	0	0	0	1	1	no
Glyma01g37690	Glyma01g37690	Glyma01g37690	Gm01:50011031-50012116	14-7-0	14-7-14	NOTEST	0.223747	0.0325462	-2.78131	1.30901	0.190531	1	no
Glyma01g37710	Glyma01g37710	Glyma01g37710	Gm01:50023553-50027805	14-7-0	14-7-14	OK	20.5695	7.604	-1.43568	1.99771	0.0457483	0.22658	no
Glyma01g37720	Glyma01g37720	Glyma01g37720	Gm01:50028224-50031144	14-7-0	14-7-14	OK	6.04885	31.5285	2.38192	-2.93807	0.00330266	0.0478966	yes
Glyma01g37730	Glyma01g37730	Glyma01g37730	Gm01:50039747-50044012	14-7-0	14-7-14	OK	4.87357	9.54831	0.970265	-1.37076	0.170449	0.476386	no
Glyma01g37750	Glyma01g37750	Glyma01g37750	Gm01:50051364-50051706	14-7-0	14-7-14	NOTEST	0	0.245521	1.79769e+308	1.79769e+308	0.223676	1	no
Glyma01g37760	Glyma01g37760	Glyma01g37760	Gm01:50053788-50061598	14-7-0	14-7-14	OK	4.02029	3.17861	-0.338902	0.442433	0.658176	0.875257	no
Glyma01g37780	Glyma01g37780	Glyma01g37780	Gm01:50066372-50070574	14-7-0	14-7-14	OK	13.7836	10.5086	-0.391383	0.555002	0.578893	0.835403	no
Glyma01g37790	Glyma01g37790	Glyma01g37790	Gm01:50071761-50075271	14-7-0	14-7-14	OK	31.6852	21.9956	-0.526595	0.714082	0.475176	0.774313	no
Glyma01g37801	Glyma01g37801	Glyma01g37801	Gm01:50076638-50080885	14-7-0	14-7-14	NOTEST	0	0	0	0	1	1	no
Glyma01g37810	Glyma01g37810	Glyma01g37810	Gm01:50095935-50098278	14-7-0	14-7-14	OK	0.848325	3.23049	1.92906	-2.07022	0.038432	0.206717	no
Glyma01g37820	Glyma01g37820	Glyma01g37820	Gm01:50121728-50127532	14-7-0	14-7-14	NOTEST	0.186507	0.108205	-0.785454	0.592648	0.553417	1	no
Glyma01g37840	Glyma01g37840	Glyma01g37840	Gm01:50130998-50133253	14-7-0	14-7-14	NOTEST	0	0	0	0	1	1	no
Glyma01g37850	Glyma01g37850	Glyma01g37850	Gm01:50135076-50137305	14-7-0	14-7-14	OK	0.0725431	0.576938	2.99151	-2.19946	0.027845	0.175388	no
Glyma01g37860	Glyma01g37860	Glyma01g37860	Gm01:50141791-50144442	14-7-0	14-7-14	OK	1.70306	1.61345	-0.0779858	0.085764	0.931654	0.979423	no
Glyma01g37870	Glyma01g37870	Glyma01g37870	Gm01:50146983-50150059	14-7-0	14-7-14	OK	83.0786	17.8737	-2.21664	2.61552	0.0089092	0.0897593	no
Glyma01g37880	Glyma01g37880	Glyma01g37880	Gm01:50151986-50153270	14-7-0	14-7-14	NOTEST	0	0.0559531	1.79769e+308	1.79769e+308	0.141284	1	no
Glyma01g37890	Glyma01g37890	Glyma01g37890	Gm01:50153494-50155300	14-7-0	14-7-14	OK	2.26986	2.5656	0.17669	-0.209281	0.834229	0.947991	no
Glyma01g37900	Glyma01g37900	Glyma01g37900	Gm01:50155332-50163097	14-7-0	14-7-14	OK	137.445	24.9884	-2.45953	2.73119	0.00631059	0.0725907	no
Glyma01g37910	Glyma01g37910	Glyma01g37910	Gm01:50155332-50163097	14-7-0	14-7-14	OK	3.95675	2.68186	-0.56108	0.177075	0.85945	0.957287	no
Glyma01g37920	Glyma01g37920	Glyma01g37920	Gm01:50155332-50163097	14-7-0	14-7-14	NOTEST	0.26833	0.128499	-1.06225	0.0704217	0.943858	1	no
Glyma01g37930	Glyma01g37930	Glyma01g37930	Gm01:50166501-50169549	14-7-0	14-7-14	OK	0.0485536	0.797102	4.03712	-3.07043	0.00213751	0.036102	yes
Glyma01g37940	Glyma01g37940	Glyma01g37940	Gm01:50177417-50180805	14-7-0	14-7-14	OK	6.32075	8.34435	0.400704	-0.569202	0.569219	0.829609	no
Glyma01g37950	Glyma01g37950	Glyma01g37950	Gm01:50182416-50188946	14-7-0	14-7-14	OK	2.45628	0.742684	-1.72565	1.98606	0.0470269	0.23076	no
Glyma01g37961	Glyma01g37961	Glyma01g37961	Gm01:50206805-50209153	14-7-0	14-7-14	NOTEST	0	0	0	0	1	1	no
Glyma01g37970	Glyma01g37970	Glyma01g37970	Gm01:50210431-50216350	14-7-0	14-7-14	OK	0.984351	1.8637	0.920928	-1.06414	0.287264	0.618281	no
Glyma01g37980	Glyma01g37980	Glyma01g37980	Gm01:50217118-50219743	14-7-0	14-7-14	NOTEST	0	0.158846	1.79769e+308	1.79769e+308	0.0940746	1	no
Glyma01g37993	Glyma01g37993	Glyma01g37993	Gm01:50222810-50223758	14-7-0	14-7-14	NOTEST	0.485916	0.355564	-0.450597	0.371174	0.710508	1	no
Glyma01g38006	Glyma01g38006	Glyma01g38006	Gm01:50230283-50235022	14-7-0	14-7-14	NOTEST	0	0.0846111	1.79769e+308	1.79769e+308	0.207108	1	no
Glyma01g38020	Glyma01g38020	Glyma01g38020	Gm01:50230283-50235022	14-7-0	14-7-14	LOWDATA	0	0	1.79769e+308	0	1	1	no
Glyma01g38040	Glyma01g38040	Glyma01g38040	Gm01:50244376-50247091	14-7-0	14-7-14	NOTEST	0	0	0	0	1	1	no
Glyma01g38050	Glyma01g38050	Glyma01g38050	Gm01:50251094-50252088	14-7-0	14-7-14	NOTEST	0	0	0	0	1	1	no
Glyma01g38060	Glyma01g38060	Glyma01g38060	Gm01:50253664-50255929	14-7-0	14-7-14	NOTEST	0	0	0	0	1	1	no
Glyma01g38070	Glyma01g38070	Glyma01g38070	Gm01:50257294-50261107	14-7-0	14-7-14	OK	8.86783	4.91273	-0.852058	1.04065	0.298036	0.629692	no
Glyma01g38080	Glyma01g38080	Glyma01g38080	Gm01:50257294-50261107	14-7-0	14-7-14	OK	5.19349	0.57238	-3.18166	0.443415	0.657466	0.87479	no
Glyma01g38090	Glyma01g38090	Glyma01g38090	Gm01:50261440-50263777	14-7-0	14-7-14	OK	3.60247	6.14414	0.770223	-1.03485	0.30074	0.631995	no
Glyma01g38105	Glyma01g38105	Glyma01g38105	Gm01:50271874-50276395	14-7-0	14-7-14	NOTEST	0.114305	0.138465	0.276634	-0.210601	0.833199	1	no
Glyma01g38120	Glyma01g38120	Glyma01g38120	Gm01:50277040-50282069	14-7-0	14-7-14	OK	37.3814	20.2946	-0.881223	1.11699	0.263997	0.594183	no
Glyma01g38130	Glyma01g38130	Glyma01g38130	Gm01:50286808-50291347	14-7-0	14-7-14	OK	0.191225	6.32334	5.04734	-5.08394	3.69694e-07	5.64958e-05	yes
Glyma01g38150	Glyma01g38150	Glyma01g38150	Gm01:50297901-50304459	14-7-0	14-7-14	OK	0.557312	0.559201	0.00488019	-0.00490303	0.996088	0.998826	no
Glyma01g38165	Glyma01g38165	Glyma01g38165	Gm01:50306261-50309677	14-7-0	14-7-14	OK	5.80727	3.07542	-0.917079	1.03202	0.302063	0.633292	no
Glyma01g38180	Glyma01g38180	Glyma01g38180	Gm01:50334433-50339882	14-7-0	14-7-14	OK	0.662977	8.11926	3.61432	-3.83775	0.000124166	0.00492783	yes
Glyma01g38190	Glyma01g38190	Glyma01g38190	Gm01:50334433-50339882	14-7-0	14-7-14	OK	0.164596	2.33149	3.82425	-1.07232	0.283575	0.614399	no
Glyma01g38200	Glyma01g38200	Glyma01g38200	Gm01:50344732-50351525	14-7-0	14-7-14	OK	14.9196	21.3905	0.519759	-0.686229	0.492569	0.785556	no
Glyma01g38211	Glyma01g38211	Glyma01g38211	Gm01:50359266-50363158	14-7-0	14-7-14	OK	279.994	258.741	-0.11389	0.0465026	0.96291	0.989497	no
Glyma01g38220	Glyma01g38220	Glyma01g38220	Gm01:50366968-50368330	14-7-0	14-7-14	OK	0.967928	0.0614202	-3.97811	2.58317	0.00978961	0.0950281	no
Glyma01g38230	Glyma01g38230	Glyma01g38230	Gm01:50369093-50373219	14-7-0	14-7-14	OK	7.27579	8.45145	0.216095	-0.291249	0.770861	0.924473	no
Glyma01g38240	Glyma01g38240	Glyma01g38240	Gm01:50382617-50389821	14-7-0	14-7-14	OK	2.97535	2.93938	-0.0175442	0.0244002	0.980533	0.994197	no
Glyma01g38250	Glyma01g38250	Glyma01g38250	Gm01:50392826-50393355	14-7-0	14-7-14	NOTEST	0	0	0	0	1	1	no
Glyma01g38260	Glyma01g38260	Glyma01g38260	Gm01:50394489-50396439	14-7-0	14-7-14	OK	2.49966	0.766076	-1.70617	1.60071	0.109441	0.373285	no
Glyma01g38270	Glyma01g38270	Glyma01g38270	Gm01:50396914-50399570	14-7-0	14-7-14	OK	2.56246	2.13541	-0.263021	0.283766	0.77659	0.926446	no
Glyma01g38280	Glyma01g38280	Glyma01g38280	Gm01:50400416-50410022	14-7-0	14-7-14	OK	1.2764	0.847972	-0.589993	0.702858	0.482144	0.77894	no
Glyma01g38285	Glyma01g38285	Glyma01g38285	Gm01:50429282-50431539	14-7-0	14-7-14	NOTEST	0	0	0	0	1	1	no
Glyma01g38290	Glyma01g38290	Glyma01g38290	Gm01:50444755-50448681	14-7-0	14-7-14	OK	12.3913	11.9594	-0.051182	0.069141	0.944877	0.983917	no
Glyma01g38305	Glyma01g38305	Glyma01g38305	Gm01:50449917-50454973	14-7-0	14-7-14	OK	1.6021	2.00619	0.324496	-0.341513	0.732717	0.908548	no
Glyma01g38320	Glyma01g38320	Glyma01g38320	Gm01:50456603-50460237	14-7-0	14-7-14	OK	17.8238	10.4891	-0.764919	0.992864	0.320776	0.651857	no
Glyma01g38330	Glyma01g38330	Glyma01g38330	Gm01:50462526-50464658	14-7-0	14-7-14	OK	2.66396	2.90846	0.126681	-0.115975	0.907672	0.971925	no
Glyma01g38340	Glyma01g38340	Glyma01g38340	Gm01:50465731-50468463	14-7-0	14-7-14	NOTEST	0	0.0107791	1.79769e+308	1.79769e+308	0.223676	1	no
Glyma01g38350	Glyma01g38350	Glyma01g38350	Gm01:50468718-50471279	14-7-0	14-7-14	NOTEST	0.235613	0.423215	0.844973	-0.695204	0.486927	1	no
Glyma01g38360	Glyma01g38360	Glyma01g38360	Gm01:50481849-50484062	14-7-0	14-7-14	OK	7.64894	12.1024	0.661961	-0.926828	0.354016	0.682319	no
Glyma01g38370	Glyma01g38370	Glyma01g38370	Gm01:50487836-50491942	14-7-0	14-7-14	OK	11.0225	10.8656	-0.0206803	0.0283507	0.977382	0.993639	no
Glyma01g38381	Glyma01g38381	Glyma01g38381	Gm01:50492109-50499655	14-7-0	14-7-14	NOTEST	0.142617	0.263137	0.883672	-0.690507	0.489875	1	no
Glyma01g38390	Glyma01g38390	Glyma01g38390	Gm01:50502781-50505172	14-7-0	14-7-14	NOTEST	0	0	0	0	1	1	no
Glyma01g38400	Glyma01g38400	Glyma01g38400	Gm01:50522426-50525037	14-7-0	14-7-14	OK	2.97857	5.38458	0.854217	-1.1267	0.259869	0.590461	no
Glyma01g38410	Glyma01g38410	Glyma01g38410	Gm01:50528621-50536566	14-7-0	14-7-14	OK	11.1934	6.51485	-0.780844	0.95225	0.34097	0.670119	no
Glyma01g38430	Glyma01g38430	Glyma01g38430	Gm01:50543383-50544862	14-7-0	14-7-14	NOTEST	0	0.0769188	1.79769e+308	1.79769e+308	0.0777245	1	no
Glyma01g38450	Glyma01g38450	Glyma01g38450	Gm01:50549840-50551564	14-7-0	14-7-14	OK	12.3293	35.4942	1.5255	-2.02688	0.0426743	0.218503	no
Glyma01g38460	Glyma01g38460	Glyma01g38460	Gm01:50559469-50563981	14-7-0	14-7-14	OK	2.07216	2.36473	0.190544	-0.22577	0.821381	0.942408	no
Glyma01g38470	Glyma01g38470	Glyma01g38470	Gm01:50564247-50567428	14-7-0	14-7-14	OK	67.2424	50.267	-0.419759	0.490944	0.623466	0.858341	no
Glyma01g38481	Glyma01g38481	Glyma01g38481	Gm01:50571005-50572016	14-7-0	14-7-14	OK	0.334706	0.624063	0.898797	-0.749092	0.453802	0.75996	no
Glyma01g38490	Glyma01g38490	Glyma01g38490	Gm01:50575585-50578085	14-7-0	14-7-14	OK	0.692674	1.0099	0.543966	-0.54025	0.589025	0.84087	no
Glyma01g38500	Glyma01g38500	Glyma01g38500	Gm01:50580026-50582631	14-7-0	14-7-14	OK	5.1608	0.0577968	-6.48046	5.32694	9.988e-08	2.06549e-05	yes
Glyma01g38510	Glyma01g38510	Glyma01g38510	Gm01:50585499-50587165	14-7-0	14-7-14	OK	10.5191	7.10142	-0.566829	0.786127	0.431793	0.744893	no
Glyma01g38520	Glyma01g38520	Glyma01g38520	Gm01:50595299-50597560	14-7-0	14-7-14	OK	1.03712	3.17151	1.61259	-1.83806	0.0660541	0.278875	no
Glyma01g38530	Glyma01g38530	Glyma01g38530	Gm01:50601604-50607434	14-7-0	14-7-14	NOTEST	0	0	0	0	1	1	no
Glyma01g38540	Glyma01g38540	Glyma01g38540	Gm01:50612385-50613848	14-7-0	14-7-14	NOTEST	0	0	0	0	1	1	no
Glyma01g38550	Glyma01g38550	Glyma01g38550	Gm01:50621610-50624263	14-7-0	14-7-14	NOTEST	0	0.0180035	1.79769e+308	1.79769e+308	0.223676	1	no
Glyma01g38560	Glyma01g38560	Glyma01g38560	Gm01:50625695-50629374	14-7-0	14-7-14	NOTEST	0.215045	0.251803	0.227661	-0.209187	0.834303	1	no
Glyma01g38570	Glyma01g38570	Glyma01g38570	Gm01:50630573-50632809	14-7-0	14-7-14	NOTEST	0.283637	0.287069	0.0173527	-0.0147961	0.988195	1	no
Glyma01g38580	Glyma01g38580	Glyma01g38580	Gm01:50633743-50644902	14-7-0	14-7-14	OK	0.504279	0.939094	0.897047	-1.05842	0.289864	0.621184	no
Glyma01g38590	Glyma01g38590	Glyma01g38590	Gm01:50645459-50648060	14-7-0	14-7-14	OK	8.30408	1.20678	-2.78266	3.34608	0.000819615	0.0186327	yes
Glyma01g38600	Glyma01g38600	Glyma01g38600	Gm01:50652785-50654854	14-7-0	14-7-14	NOTEST	0.213089	0.0780492	-1.449	1.09193	0.274864	1	no
Glyma01g38610	Glyma01g38610	Glyma01g38610	Gm01:50657110-50660265	14-7-0	14-7-14	NOTEST	0	0.0966393	1.79769e+308	1.79769e+308	0.0702947	1	no
Glyma01g38630	Glyma01g38630	Glyma01g38630	Gm01:50667181-50669294	14-7-0	14-7-14	NOTEST	0	0.0800111	1.79769e+308	1.79769e+308	0.0777245	1	no
Glyma01g38640	Glyma01g38640	Glyma01g38640	Gm01:50682059-50689940	14-7-0	14-7-14	OK	11.92	6.22514	-0.937211	1.14892	0.250591	0.578588	no
Glyma01g38650	Glyma01g38650	Glyma01g38650	Gm01:50714207-50721679	14-7-0	14-7-14	OK	23.2518	17.4107	-0.417365	0.522188	0.601539	0.84728	no
Glyma01g38660	Glyma01g38660	Glyma01g38660	Gm01:50733266-50737661	14-7-0	14-7-14	OK	0.299975	0.722739	1.26863	-1.21208	0.225481	0.549798	no
Glyma01g38671	Glyma01g38671	Glyma01g38671	Gm01:50746604-50760836	14-7-0	14-7-14	OK	0.700826	1.67951	1.26091	-1.48154	0.138463	0.425899	no
Glyma01g38680	Glyma01g38680	Glyma01g38680	Gm01:50767560-50772744	14-7-0	14-7-14	OK	2.20348	3.90291	0.824769	-1.10662	0.268456	0.599298	no
Glyma01g38683	Glyma01g38683	Glyma01g38683	Gm01:50776465-50776986	14-7-0	14-7-14	NOTEST	0	0	0	0	1	1	no
Glyma01g38686	Glyma01g38686	Glyma01g38686	Gm01:50778421-50779180	14-7-0	14-7-14	NOTEST	0	0	0	0	1	1	no
Glyma01g38690	Glyma01g38690	Glyma01g38690	Gm01:50779484-50780771	14-7-0	14-7-14	NOTEST	0	0.174852	1.79769e+308	1.79769e+308	0.059764	1	no
Glyma01g38710	Glyma01g38710	Glyma01g38710	Gm01:50784350-50784782	14-7-0	14-7-14	OK	0.997085	0	-1.79769e+308	-1.79769e+308	0.0531553	0.246981	no
Glyma01g38720	Glyma01g38720	Glyma01g38720	Gm01:50799865-50800659	14-7-0	14-7-14	OK	0.716316	0.283218	-1.33868	1.078	0.281033	0.611728	no
Glyma01g38730	Glyma01g38730	Glyma01g38730	Gm01:50805196-50807200	14-7-0	14-7-14	NOTEST	0.248908	0.332511	0.417786	-0.360696	0.718327	1	no
Glyma01g38740	Glyma01g38740	Glyma01g38740	Gm01:50808925-50811172	14-7-0	14-7-14	OK	1.24958	4.06684	1.70247	-1.53773	0.124114	0.400115	no
Glyma01g38750	Glyma01g38750	Glyma01g38750	Gm01:50813274-50815197	14-7-0	14-7-14	OK	894.261	310.737	-1.525	1.09543	0.273327	0.604042	no
Glyma01g38760	Glyma01g38760	Glyma01g38760	Gm01:50816662-50817396	14-7-0	14-7-14	OK	5.62253	0.181664	-4.95187	2.42374	0.0153617	0.124782	no
Glyma01g38770	Glyma01g38770	Glyma01g38770	Gm01:50817872-50819939	14-7-0	14-7-14	OK	8.52604	0.755112	-3.49711	3.66121	0.000251029	0.00812811	yes
Glyma01g38780	Glyma01g38780	Glyma01g38780	Gm01:50823650-50825788	14-7-0	14-7-14	NOTEST	0.179081	0.0380777	-2.2336	1.38508	0.166028	1	no
Glyma01g38800	Glyma01g38800	Glyma01g38800	Gm01:50835383-50838753	14-7-0	14-7-14	OK	12.355	9.45211	-0.386384	0.54588	0.585148	0.839266	no
Glyma01g38830	Glyma01g38830	Glyma01g38830	Gm01:50842944-50844670	14-7-0	14-7-14	NOTEST	0	0	0	0	1	1	no
Glyma01g38840	Glyma01g38840	Glyma01g38840	Gm01:50846296-50851361	14-7-0	14-7-14	OK	4.33089	3.5829	-0.273537	0.371125	0.710545	0.898834	no
Glyma01g38850	Glyma01g38850	Glyma01g38850	Gm01:50852873-50855077	14-7-0	14-7-14	NOTEST	0	0.101536	1.79769e+308	1.79769e+308	0.0777245	1	no
Glyma01g38860	Glyma01g38860	Glyma01g38860	Gm01:50858802-50861902	14-7-0	14-7-14	NOTEST	0	0.0586194	1.79769e+308	1.79769e+308	0.0940746	1	no
Glyma01g38870	Glyma01g38870	Glyma01g38870	Gm01:50865163-50867505	14-7-0	14-7-14	NOTEST	0	0.0937594	1.79769e+308	1.79769e+308	0.0644759	1	no
Glyma01g38880	Glyma01g38880	Glyma01g38880	Gm01:50879358-50885115	14-7-0	14-7-14	OK	1.86895	0.0364471	-5.68028	3.85513	0.000115669	0.00466426	yes
Glyma01g38890	Glyma01g38890	Glyma01g38890	Gm01:50885116-50891376	14-7-0	14-7-14	OK	2.33103	3.33298	0.515847	-0.718934	0.472181	0.772477	no
Glyma01g38900	Glyma01g38900	Glyma01g38900	Gm01:50896720-50898557	14-7-0	14-7-14	NOTEST	0	0.033178	1.79769e+308	1.79769e+308	0.141284	1	no
Glyma01g38905	Glyma01g38905	Glyma01g38905	Gm01:50904042-50904806	14-7-0	14-7-14	NOTEST	0	0	0	0	1	1	no
Glyma01g38910	Glyma01g38910	Glyma01g38910	Gm01:50905481-50907657	14-7-0	14-7-14	OK	1.58511	1.64689	0.0551668	-0.0555393	0.955709	0.987467	no
Glyma01g38920	Glyma01g38920	Glyma01g38920	Gm01:50914354-50920765	14-7-0	14-7-14	OK	0.342346	1.32718	1.95484	-1.91151	0.0559396	0.254047	no
Glyma01g38930	Glyma01g38930	Glyma01g38930	Gm01:50921917-50923972	14-7-0	14-7-14	OK	67.2655	99.748	0.568421	-0.685175	0.493234	0.785805	no
Glyma01g38940	Glyma01g38940	Glyma01g38940	Gm01:50926261-50927303	14-7-0	14-7-14	OK	217.137	107.436	-1.01513	1.10707	0.268265	0.599192	no
Glyma01g38950	Glyma01g38950	Glyma01g38950	Gm01:50927363-50936118	14-7-0	14-7-14	OK	20.694	7.93166	-1.38352	1.87113	0.0613277	0.268092	no
Glyma01g38970	Glyma01g38970	Glyma01g38970	Gm01:50951026-50952807	14-7-0	14-7-14	OK	0.552475	0.762855	0.465498	-0.432817	0.665147	0.877817	no
Glyma01g38980	Glyma01g38980	Glyma01g38980	Gm01:50956636-50960580	14-7-0	14-7-14	OK	0.969635	6.00929	2.63168	-3.16002	0.00157758	0.0293133	yes
Glyma01g38990	Glyma01g38990	Glyma01g38990	Gm01:50965004-50966084	14-7-0	14-7-14	NOTEST	0	0.200772	1.79769e+308	1.79769e+308	0.0940746	1	no
Glyma01g39000	Glyma01g39000	Glyma01g39000	Gm01:50968054-50971842	14-7-0	14-7-14	OK	0.779744	1.8144	1.21842	-1.40384	0.160368	0.460957	no
Glyma01g39010	Glyma01g39010	Glyma01g39010	Gm01:50973225-50978011	14-7-0	14-7-14	OK	0.633901	1.90492	1.5874	-1.82928	0.0673573	0.281819	no
Glyma01g39020	Glyma01g39020	Glyma01g39020	Gm01:50978689-50990291	14-7-0	14-7-14	OK	2.59713	4.3479	0.743404	-0.85018	0.395225	0.716946	no
Glyma01g39030	Glyma01g39030	Glyma01g39030	Gm01:50993362-50998484	14-7-0	14-7-14	OK	11.8691	5.74228	-1.04751	1.32149	0.186337	0.500394	no
Glyma01g39040	Glyma01g39040	Glyma01g39040	Gm01:51015839-51018131	14-7-0	14-7-14	OK	1.8727	0	-1.79769e+308	-1.79769e+308	0.00987826	0.0953329	no
Glyma01g39050	Glyma01g39050	Glyma01g39050	Gm01:51020378-51026936	14-7-0	14-7-14	OK	2.95644	2.36799	-0.320198	0.409257	0.682351	0.886401	no
Glyma01g39060	Glyma01g39060	Glyma01g39060	Gm01:51032159-51036122	14-7-0	14-7-14	NOTEST	0	0.0320724	1.79769e+308	1.79769e+308	0.248072	1	no
Glyma01g39071	Glyma01g39071	Glyma01g39071	Gm01:51054324-51059649	14-7-0	14-7-14	NOTEST	0	0	0	0	1	1	no
Glyma01g39080	Glyma01g39080	Glyma01g39080	Gm01:51065275-51067178	14-7-0	14-7-14	NOTEST	0	0.0345314	1.79769e+308	1.79769e+308	0.223676	1	no
Glyma01g39090	Glyma01g39090	Glyma01g39090	Gm01:51073678-51079219	14-7-0	14-7-14	OK	1.30009	2.05732	0.662161	-0.777705	0.436743	0.749006	no
Glyma01g39100	Glyma01g39100	Glyma01g39100	Gm01:51080529-51083731	14-7-0	14-7-14	OK	2.68578	1.87859	-0.515694	0.624737	0.532144	0.808751	no
Glyma01g39110	Glyma01g39110	Glyma01g39110	Gm01:51090471-51105666	14-7-0	14-7-14	NOTEST	0.443376	0.330978	-0.421795	0.368809	0.71227	1	no
Glyma01g39120	Glyma01g39120	Glyma01g39120	Gm01:51105888-51110702	14-7-0	14-7-14	OK	44.3643	59.3012	0.418664	-0.288251	0.773154	0.924954	no
Glyma01g39141	Glyma01g39141	Glyma01g39141	Gm01:51125197-51131131	14-7-0	14-7-14	OK	3.07464	2.69691	-0.189109	0.265752	0.79043	0.931211	no
Glyma01g39160	Glyma01g39160	Glyma01g39160	Gm01:51146769-51147427	14-7-0	14-7-14	NOTEST	0	0	0	0	1	1	no
Glyma01g39170	Glyma01g39170	Glyma01g39170	Gm01:51153265-51154075	14-7-0	14-7-14	NOTEST	0	0	0	0	1	1	no
Glyma01g39180	Glyma01g39180	Glyma01g39180	Gm01:51160065-51160350	14-7-0	14-7-14	NOTEST	0	0	0	0	1	1	no
Glyma01g39190	Glyma01g39190	Glyma01g39190	Gm01:51164315-51168296	14-7-0	14-7-14	OK	0.822409	1.6781	1.0289	-0.794982	0.426624	0.740861	no
Glyma01g39200	Glyma01g39200	Glyma01g39200	Gm01:51176939-51182827	14-7-0	14-7-14	OK	68.4295	24.4304	-1.48594	1.87188	0.0612231	0.268012	no
Glyma01g39220	Glyma01g39220	Glyma01g39220	Gm01:51195447-51198098	14-7-0	14-7-14	OK	1.34151	6.93179	2.36937	-2.90444	0.00367914	0.051639	no
Glyma01g39230	Glyma01g39230	Glyma01g39230	Gm01:51207026-51208664	14-7-0	14-7-14	NOTEST	0	0.255958	1.79769e+308	1.79769e+308	0.0558529	1	no
Glyma01g39240	Glyma01g39240	Glyma01g39240	Gm01:51218796-51220209	14-7-0	14-7-14	OK	3.43612	6.92215	1.01044	-1.29586	0.195025	0.512116	no
Glyma01g39250	Glyma01g39250	Glyma01g39250	Gm01:51223239-51226456	14-7-0	14-7-14	OK	7.54591	7.43508	-0.0213462	0.0185314	0.985215	0.995698	no
Glyma01g39260	Glyma01g39260	Glyma01g39260	Gm01:51227462-51229777	14-7-0	14-7-14	OK	3.91567	2.71819	-0.526613	0.671052	0.502187	0.790512	no
Glyma01g39270	Glyma01g39270	Glyma01g39270	Gm01:51234092-51236207	14-7-0	14-7-14	OK	123.131	55.0523	-1.16132	1.29195	0.196374	0.514028	no
Glyma01g39280	Glyma01g39280	Glyma01g39280	Gm01:51241780-51246700	14-7-0	14-7-14	OK	27.4714	10.2835	-1.41759	1.89799	0.0576975	0.258946	no
Glyma01g39290	Glyma01g39290	Glyma01g39290	Gm01:51259529-51261619	14-7-0	14-7-14	OK	4.26283	5.58898	0.390774	-0.544605	0.586025	0.83939	no
Glyma01g39300	Glyma01g39300	Glyma01g39300	Gm01:51273336-51279506	14-7-0	14-7-14	NOTEST	0	0	0	0	1	1	no
Glyma01g39306	Glyma01g39306	Glyma01g39306	Gm01:51273336-51279506	14-7-0	14-7-14	NOTEST	0	0	0	0	1	1	no
Glyma01g39313	Glyma01g39313	Glyma01g39313	Gm01:51280851-51284021	14-7-0	14-7-14	NOTEST	0	0	0	0	1	1	no
Glyma01g39320	Glyma01g39320	Glyma01g39320	Gm01:51287475-51290552	14-7-0	14-7-14	OK	3.64736	3.10948	-0.23018	0.297174	0.766334	0.922878	no
Glyma01g39330	Glyma01g39330	Glyma01g39330	Gm01:51290922-51295650	14-7-0	14-7-14	OK	11.6221	14.4025	0.309456	-0.437407	0.661816	0.876346	no
Glyma01g39340	Glyma01g39340	Glyma01g39340	Gm01:51296877-51297857	14-7-0	14-7-14	OK	1.99625	2.5399	0.347481	-0.333835	0.738504	0.911438	no
Glyma01g39350	Glyma01g39350	Glyma01g39350	Gm01:51298441-51305321	14-7-0	14-7-14	OK	25.5032	81.5951	1.6778	-2.05368	0.0400064	0.21058	no
Glyma01g39360	Glyma01g39360	Glyma01g39360	Gm01:51314677-51315832	14-7-0	14-7-14	NOTEST	0	0	0	0	1	1	no
Glyma01g39370	Glyma01g39370	Glyma01g39370	Gm01:51321188-51322374	14-7-0	14-7-14	OK	3.77646	31.0644	3.04016	-3.82283	0.00013193	0.00511197	yes
Glyma01g39380	Glyma01g39380	Glyma01g39380	Gm01:51332253-51333769	14-7-0	14-7-14	NOTEST	0	0.12391	1.79769e+308	1.79769e+308	0.0644759	1	no
Glyma01g39391	Glyma01g39391	Glyma01g39391	Gm01:51334950-51335823	14-7-0	14-7-14	NOTEST	0	0	0	0	1	1	no
Glyma01g39401	Glyma01g39401	Glyma01g39401	Gm01:51345282-51346122	14-7-0	14-7-14	NOTEST	0	0	0	0	1	1	no
Glyma01g39410	Glyma01g39410	Glyma01g39410	Gm01:51349990-51355206	14-7-0	14-7-14	OK	7.2315	4.35666	-0.731072	0.914613	0.360395	0.686936	no
Glyma01g39420	Glyma01g39420	Glyma01g39420	Gm01:51355206-51358366	14-7-0	14-7-14	OK	3.90682	8.43528	1.11044	-1.55104	0.120892	0.394496	no
Glyma01g39430	Glyma01g39430	Glyma01g39430	Gm01:51363128-51376630	14-7-0	14-7-14	OK	1.04622	0.590388	-0.825449	1.00488	0.314954	0.646746	no
Glyma01g39440	Glyma01g39440	Glyma01g39440	Gm01:51376879-51383234	14-7-0	14-7-14	NOTEST	0	0	0	0	1	1	no
Glyma01g39451	Glyma01g39451	Glyma01g39451	Gm01:51385174-51388582	14-7-0	14-7-14	NOTEST	0.12332	0.150867	0.290877	-0.22101	0.825085	1	no
Glyma01g39460	Glyma01g39460	Glyma01g39460	Gm01:51397147-51399175	14-7-0	14-7-14	OK	0	5.86054	1.79769e+308	1.79769e+308	0.00464345	0.0598404	no
Glyma01g39470	Glyma01g39470	Glyma01g39470	Gm01:51403228-51406259	14-7-0	14-7-14	OK	1.88407	3.74302	0.990351	-1.05864	0.289765	0.621064	no
Glyma01g39480	Glyma01g39480	Glyma01g39480	Gm01:51407024-51411165	14-7-0	14-7-14	NOTEST	0.0473164	0.199247	2.07414	-1.48411	0.137779	1	no
Glyma01g39490	Glyma01g39490	Glyma01g39490	Gm01:51412886-51422885	14-7-0	14-7-14	OK	1.69465	2.01306	0.248402	-0.32276	0.746877	0.913876	no
Glyma01g39500	Glyma01g39500	Glyma01g39500	Gm01:51428871-51431363	14-7-0	14-7-14	OK	93.633	12.231	-2.93647	3.63969	0.00027297	0.00860832	yes
Glyma01g39510	Glyma01g39510	Glyma01g39510	Gm01:51431925-51439061	14-7-0	14-7-14	OK	0.680813	2.01268	1.56379	-1.80047	0.0717864	0.292795	no
Glyma01g39520	Glyma01g39520	Glyma01g39520	Gm01:51456457-51460406	14-7-0	14-7-14	OK	6.05211	7.97354	0.397781	-0.484722	0.627874	0.860654	no
Glyma01g39530	Glyma01g39530	Glyma01g39530	Gm01:51483951-51489283	14-7-0	14-7-14	OK	213.247	266.67	0.322529	-0.272052	0.785582	0.929463	no
Glyma01g39540	Glyma01g39540	Glyma01g39540	Gm01:51490230-51491823	14-7-0	14-7-14	OK	38.1864	20.4894	-0.898183	1.19772	0.231025	0.555367	no
Glyma01g39560	Glyma01g39560	Glyma01g39560	Gm01:51508290-51512259	14-7-0	14-7-14	OK	9.57563	6.94346	-0.463714	0.611534	0.540846	0.813096	no
Glyma01g39570	Glyma01g39570	Glyma01g39570	Gm01:51516172-51517312	14-7-0	14-7-14	OK	1.73146	0.290461	-2.57558	2.3339	0.019601	0.144806	no
Glyma01g39580	Glyma01g39580	Glyma01g39580	Gm01:51518038-51522362	14-7-0	14-7-14	OK	11.5684	17.3407	0.583966	-0.829738	0.406687	0.726058	no
Glyma01g39590	Glyma01g39590	Glyma01g39590	Gm01:51527348-51528891	14-7-0	14-7-14	OK	0.149142	1.7134	3.52211	-3.05514	0.00224953	0.0372111	yes
Glyma01g39600	Glyma01g39600	Glyma01g39600	Gm01:51531989-51534998	14-7-0	14-7-14	OK	6.74676	6.45897	-0.062889	0.0777912	0.937994	0.981541	no
Glyma01g39610	Glyma01g39610	Glyma01g39610	Gm01:51545785-51549819	14-7-0	14-7-14	OK	1.13627	2.7489	1.27455	-1.5395	0.123681	0.399363	no
Glyma01g39630	Glyma01g39630	Glyma01g39630	Gm01:51555027-51556605	14-7-0	14-7-14	OK	0.209905	0.569689	1.44044	-1.2164	0.223833	0.54797	no
Glyma01g39640	Glyma01g39640	Glyma01g39640	Gm01:51557943-51560354	14-7-0	14-7-14	OK	4.92604	10.0013	1.02169	-1.34083	0.179975	0.490926	no
Glyma01g39650	Glyma01g39650	Glyma01g39650	Gm01:51565663-51573461	14-7-0	14-7-14	OK	2.83389	4.65299	0.715372	-0.977056	0.328542	0.658989	no
Glyma01g39660	Glyma01g39660	Glyma01g39660	Gm01:51574045-51576407	14-7-0	14-7-14	OK	1.24116	1.26166	0.0236345	-0.0266042	0.978775	0.99407	no
Glyma01g39690	Glyma01g39690	Glyma01g39690	Gm01:51579270-51581490	14-7-0	14-7-14	OK	0.059376	0.504925	3.08812	-2.28745	0.0221694	0.155815	no
Glyma01g39700	Glyma01g39700	Glyma01g39700	Gm01:51584479-51586969	14-7-0	14-7-14	OK	4.17201	4.81756	0.207559	-0.221863	0.824421	0.944084	no
Glyma01g39710	Glyma01g39710	Glyma01g39710	Gm01:51587208-51587971	14-7-0	14-7-14	OK	0.716714	1.03807	0.534435	-0.452058	0.651227	0.871403	no
Glyma01g39720	Glyma01g39720	Glyma01g39720	Gm01:51588563-51590809	14-7-0	14-7-14	NOTEST	0.119587	0.0595061	-1.00695	0.693019	0.488298	1	no
Glyma01g39740	Glyma01g39740	Glyma01g39740	Gm01:51613142-51614901	14-7-0	14-7-14	OK	14.6905	39.3582	1.42178	-1.87462	0.0608446	0.266944	no
Glyma01g39750	Glyma01g39750	Glyma01g39750	Gm01:51624486-51625983	14-7-0	14-7-14	OK	0.371924	1.11236	1.58054	-1.23172	0.218055	0.541134	no
Glyma01g39760	Glyma01g39760	Glyma01g39760	Gm01:51627630-51629200	14-7-0	14-7-14	NOTEST	0	0.150186	1.79769e+308	1.79769e+308	0.0644759	1	no
Glyma01g39770	Glyma01g39770	Glyma01g39770	Gm01:51633199-51634269	14-7-0	14-7-14	OK	13.3567	8.91478	-0.583295	0.769856	0.441385	0.751905	no
Glyma01g39780	Glyma01g39780	Glyma01g39780	Gm01:51645378-51647678	14-7-0	14-7-14	NOTEST	0	0.0280145	1.79769e+308	1.79769e+308	0.141284	1	no
Glyma01g39790	Glyma01g39790	Glyma01g39790	Gm01:51653322-51656914	14-7-0	14-7-14	OK	23.4055	16.675	-0.489157	0.668035	0.504111	0.791794	no
Glyma01g39800	Glyma01g39800	Glyma01g39800	Gm01:51659391-51665037	14-7-0	14-7-14	OK	1.82615	1.52225	-0.262598	0.301026	0.763394	0.921602	no
Glyma01g39810	Glyma01g39810	Glyma01g39810	Gm01:51668222-51670161	14-7-0	14-7-14	OK	30.0801	94.3529	1.64926	-2.04168	0.0411833	0.214155	no
Glyma01g39820	Glyma01g39820	Glyma01g39820	Gm01:51675929-51677501	14-7-0	14-7-14	NOTEST	0	0.0652513	1.79769e+308	1.79769e+308	0.0940746	1	no
Glyma01g39830	Glyma01g39830	Glyma01g39830	Gm01:51679882-51690594	14-7-0	14-7-14	OK	2.35447	3.07547	0.385403	-0.484846	0.627786	0.860605	no
Glyma01g39850	Glyma01g39850	Glyma01g39850	Gm01:51698415-51700257	14-7-0	14-7-14	OK	2.2216	30.8687	3.79647	-4.6682	3.03854e-06	0.000285544	yes
Glyma01g39860	Glyma01g39860	Glyma01g39860	Gm01:51704330-51708072	14-7-0	14-7-14	OK	0.320107	1.57085	2.29492	-2.16786	0.0301695	0.182947	no
Glyma01g39870	Glyma01g39870	Glyma01g39870	Gm01:51714716-51716494	14-7-0	14-7-14	NOTEST	0.0559679	0.204786	1.87145	-1.33241	0.182726	1	no
Glyma01g39880	Glyma01g39880	Glyma01g39880	Gm01:51721226-51730602	14-7-0	14-7-14	NOTEST	0.38026	0.401898	0.0798444	-0.0125109	0.990018	1	no
Glyma01g39890	Glyma01g39890	Glyma01g39890	Gm01:51721226-51730602	14-7-0	14-7-14	OK	52.5291	15.1811	-1.79084	2.28988	0.0220283	0.155156	no
Glyma01g39900	Glyma01g39900	Glyma01g39900	Gm01:51730921-51747255	14-7-0	14-7-14	NOTEST	0	0.102795	1.79769e+308	1.79769e+308	0.358984	1	no
Glyma01g39910	Glyma01g39910	Glyma01g39910	Gm01:51730921-51747255	14-7-0	14-7-14	OK	2.09323	2.3842	0.187772	-0.16997	0.865034	0.959151	no
Glyma01g39920	Glyma01g39920	Glyma01g39920	Gm01:51750715-51754579	14-7-0	14-7-14	OK	1.55071	1.56896	0.0168806	-0.0156932	0.987479	0.996222	no
Glyma01g39935	Glyma01g39935	Glyma01g39935	Gm01:51755461-51757387	14-7-0	14-7-14	OK	15.983	17.3133	0.115343	-0.163974	0.869752	0.960418	no
Glyma01g39950	Glyma01g39950	Glyma01g39950	Gm01:51758052-51764933	14-7-0	14-7-14	OK	7.93542	20.5054	1.36963	-1.89258	0.0584133	0.260658	no
Glyma01g39960	Glyma01g39960	Glyma01g39960	Gm01:51768697-51773656	14-7-0	14-7-14	OK	15.7186	9.41285	-0.739771	1.02056	0.307461	0.639219	no
Glyma01g39970	Glyma01g39970	Glyma01g39970	Gm01:51778756-51782898	14-7-0	14-7-14	OK	13.3411	4.95301	-1.42949	1.98846	0.0467611	0.229925	no
Glyma01g39981	Glyma01g39981	Glyma01g39981	Gm01:51784287-51787179	14-7-0	14-7-14	OK	2.58215	2.34783	-0.137246	0.130603	0.896089	0.968457	no
Glyma01g39990	Glyma01g39990	Glyma01g39990	Gm01:51795376-51797766	14-7-0	14-7-14	OK	0.571416	13.2547	4.53582	-4.89315	9.92335e-07	0.000121544	yes
Glyma01g40010	Glyma01g40010	Glyma01g40010	Gm01:51813387-51815770	14-7-0	14-7-14	OK	32.6703	0.642274	-5.66864	6.23883	4.40858e-10	2.82694e-07	yes
Glyma01g40030	Glyma01g40030	Glyma01g40030	Gm01:51830579-51838128	14-7-0	14-7-14	OK	0.380406	4.80612	3.65926	-0.642547	0.520518	0.80223	no
Glyma01g40041	Glyma01g40041	Glyma01g40041	Gm01:51830579-51838128	14-7-0	14-7-14	OK	4.51757	1.05611	-2.09678	2.25786	0.0239545	0.162326	no
Glyma01g40050	Glyma01g40050	Glyma01g40050	Gm01:51861767-51863943	14-7-0	14-7-14	NOTEST	0.158912	0.166476	0.0670873	-0.0536339	0.957227	1	no
Glyma01g40060	Glyma01g40060	Glyma01g40060	Gm01:51873281-51875272	14-7-0	14-7-14	NOTEST	0.0635654	0	-1.79769e+308	-1.79769e+308	0.0965277	1	no
Glyma01g40080	Glyma01g40080	Glyma01g40080	Gm01:51889805-51895295	14-7-0	14-7-14	OK	3.44725	4.36595	0.34085	-0.48343	0.62879	0.861075	no
Glyma01g40090	Glyma01g40090	Glyma01g40090	Gm01:51899586-51905304	14-7-0	14-7-14	OK	5.34275	2.70453	-0.982206	0.998254	0.318156	0.649687	no
Glyma01g40100	Glyma01g40100	Glyma01g40100	Gm01:51910087-51912612	14-7-0	14-7-14	NOTEST	0.46366	0.241854	-0.93893	0.826716	0.408398	1	no
Glyma01g40110	Glyma01g40110	Glyma01g40110	Gm01:51918737-51926979	14-7-0	14-7-14	NOTEST	0.0327352	0.043923	0.424136	-0.243101	0.807927	1	no
Glyma01g40130	Glyma01g40130	Glyma01g40130	Gm01:51926992-51932894	14-7-0	14-7-14	OK	3.81648	12.1884	1.6752	-2.29772	0.0215777	0.153298	no
Glyma01g40140	Glyma01g40140	Glyma01g40140	Gm01:51939465-51943260	14-7-0	14-7-14	OK	18.1023	18.7816	0.0531453	-0.074212	0.940842	0.982678	no
Glyma01g40150	Glyma01g40150	Glyma01g40150	Gm01:51946620-51947536	14-7-0	14-7-14	OK	49.2109	35.8112	-0.458568	0.630205	0.528561	0.806717	no
Glyma01g40161	Glyma01g40161	Glyma01g40161	Gm01:51948401-51952638	14-7-0	14-7-14	OK	0.110001	2.23403	4.34406	-3.88197	0.000103615	0.00431108	yes
Glyma01g40170	Glyma01g40170	Glyma01g40170	Gm01:51956944-51961922	14-7-0	14-7-14	OK	4.57359	4.47197	-0.032418	0.0455247	0.963689	0.989592	no
Glyma01g40180	Glyma01g40180	Glyma01g40180	Gm01:51965657-51969274	14-7-0	14-7-14	OK	1.47198	4.01809	1.44875	-1.78207	0.0747373	0.300225	no
Glyma01g40190	Glyma01g40190	Glyma01g40190	Gm01:51969918-51974115	14-7-0	14-7-14	OK	1.23699	3.23711	1.38788	-1.68207	0.0925559	0.339753	no
[truncated: 52,176 more rows]
