# Supplementary material for: Overexpression of a Cinnamyl Alcohol Dehydrogenase-Coding Gene, GsCAD1, from Wild Soybean Enhances Resistance to Soybean Mosaic Virus
Source: MDPI journal article supplement (doi:10.3390/ijms232315206), 2022-12-02
Supplement: s1 [file s1 › Table S7 S-1-0D-vs-7D.xlsx]

## Sheet: Sheet1
test_id	gene_id	gene	locus	sample_1	sample_2	status	value_1	value_2	log2(fold_change)	test_stat	p_value	q_value	significant
Glyma0002s50	Glyma0002s50	Glyma0002s50	Gm02:2248-17672	14-13-0	14-13-7	OK	3.17312	2.01096	-0.658021	1.14184	0.25352	0.611919	no
Glyma0003s50	Glyma0003s50	Glyma0003s50	Gm03:8648-28244	14-13-0	14-13-7	OK	13.7253	4.48916	-1.61232	2.73942	0.00615485	0.0796257	no
Glyma0005s50	Glyma0005s50	Glyma0005s50	Gm05:16184-21667	14-13-0	14-13-7	OK	0.682042	0.783144	0.199418	-0.239583	0.810654	0.953074	no
Glyma0006s50	Glyma0006s50	Glyma0006s50	Gm06:1757-15096	14-13-0	14-13-7	OK	7.93206	4.73989	-0.742843	1.28838	0.197615	0.542554	no
Glyma0007s50	Glyma0007s50	Glyma0007s50	Gm07:1209-3554	14-13-0	14-13-7	OK	0.561977	0.317017	-0.82595	0.756882	0.449121	0.782703	no
Glyma0010s50	Glyma0010s50	Glyma0010s50	Gm10:10493-13224	14-13-0	14-13-7	NOTEST	0.047578	0.0113216	-2.07122	0.571306	0.567793	1	no
Glyma0011s50	Glyma0011s50	Glyma0011s50	Gm11:1119-5508	14-13-0	14-13-7	NOTEST	0.0169714	0.148846	3.13264	-1.63044	0.103009	1	no
Glyma0015s50	Glyma0015s50	Glyma0015s50	Gm15:626-2726	14-13-0	14-13-7	NOTEST	0	0	0	0	1	1	no
Glyma0017s50	Glyma0017s50	Glyma0017s50	Gm17:405-1845	14-13-0	14-13-7	OK	0.228061	0.628629	1.46279	-0.968367	0.332861	0.690024	no
Glyma0018s50	Glyma0018s50	Glyma0018s50	Gm18:2484-40137	14-13-0	14-13-7	OK	2.48301	3.84832	0.632141	-1.07528	0.282247	0.642523	no
Glyma0021s00410	Glyma0021s00410	Glyma0021s00410	scaffold_21:663659-664067	14-13-0	14-13-7	NOTEST	0	0	0	0	1	1	no
Glyma0021s00426	Glyma0021s00426	Glyma0021s00426	scaffold_21:684712-690812	14-13-0	14-13-7	OK	0.51	0.308433	-0.72554	0.34603	0.72932	0.921061	no
Glyma0021s00443	Glyma0021s00443	Glyma0021s00443	scaffold_21:692299-694156	14-13-0	14-13-7	OK	0.83519	0.179231	-2.22028	1.40095	0.161228	0.493085	no
Glyma0021s00460	Glyma0021s00460	Glyma0021s00460	scaffold_21:716657-721100	14-13-0	14-13-7	OK	1.25823	1.1626	-0.114037	0.140181	0.888517	0.975966	no
Glyma0022s00200	Glyma0022s00200	Glyma0022s00200	scaffold_22:543542-558386	14-13-0	14-13-7	NOTEST	0	0.0297651	1.79769e+308	1.79769e+308	0.196186	1	no
Glyma0022s00273	Glyma0022s00273	Glyma0022s00273	scaffold_22:561854-563467	14-13-0	14-13-7	NOTEST	0	0	0	0	1	1	no
Glyma0022s00346	Glyma0022s00346	Glyma0022s00346	scaffold_22:563726-567494	14-13-0	14-13-7	NOTEST	0.0922419	0	-1.79769e+308	-1.79769e+308	0.123372	1	no
Glyma0022s00420	Glyma0022s00420	Glyma0022s00420	scaffold_22:722866-725638	14-13-0	14-13-7	OK	7.20411	6.15121	-0.227949	0.397938	0.690676	0.90783	no
Glyma0022s00430	Glyma0022s00430	Glyma0022s00430	scaffold_22:728729-731634	14-13-0	14-13-7	NOTEST	0.143017	0.29655	1.05209	-0.759958	0.44728	1	no
Glyma0022s00443	Glyma0022s00443	Glyma0022s00443	scaffold_22:800491-802362	14-13-0	14-13-7	NOTEST	0	0	0	0	1	1	no
Glyma0022s00456	Glyma0022s00456	Glyma0022s00456	scaffold_22:942964-948274	14-13-0	14-13-7	OK	2.96561	4.16019	0.488321	-0.489663	0.624372	0.879656	no
Glyma0022s00470	Glyma0022s00470	Glyma0022s00470	scaffold_22:942964-948274	14-13-0	14-13-7	OK	0	0.392494	1.79769e+308	1.79769e+308	0.312874	0.671685	no
Glyma0022s00480	Glyma0022s00480	Glyma0022s00480	scaffold_22:952859-956925	14-13-0	14-13-7	OK	0.644774	1.25061	0.955767	-1.17645	0.239416	0.596198	no
Glyma0023s00410	Glyma0023s00410	Glyma0023s00410	scaffold_23:476540-479148	14-13-0	14-13-7	OK	4.76512	1.73884	-1.45439	2.07718	0.0377854	0.22501	no
Glyma0023s00515	Glyma0023s00515	Glyma0023s00515	scaffold_23:689759-693471	14-13-0	14-13-7	OK	0.667008	0.765001	0.197758	-0.196899	0.843906	0.963596	no
Glyma0023s00620	Glyma0023s00620	Glyma0023s00620	scaffold_23:694208-709536	14-13-0	14-13-7	OK	5.54983	2.4954	-1.15317	1.65063	0.0988139	0.382517	no
Glyma0023s00670	Glyma0023s00670	Glyma0023s00670	scaffold_23:882926-883789	14-13-0	14-13-7	NOTEST	0	0	0	0	1	1	no
Glyma0024s00230	Glyma0024s00230	Glyma0024s00230	scaffold_24:8124-13007	14-13-0	14-13-7	OK	3.10635	2.59947	-0.257001	0.366874	0.713713	0.915638	no
Glyma0024s00245	Glyma0024s00245	Glyma0024s00245	scaffold_24:191608-197085	14-13-0	14-13-7	NOTEST	0	0	0	0	1	1	no
Glyma0024s00260	Glyma0024s00260	Glyma0024s00260	scaffold_24:201620-211808	14-13-0	14-13-7	OK	2.2452	1.54412	-0.540061	0.747284	0.454892	0.787255	no
Glyma0028s00210	Glyma0028s00210	Glyma0028s00210	scaffold_28:233807-247417	14-13-0	14-13-7	OK	14.1133	9.53873	-0.565189	0.907469	0.364159	0.716614	no
Glyma0028s00260	Glyma0028s00260	Glyma0028s00260	scaffold_28:250538-253655	14-13-0	14-13-7	NOTEST	0	0	0	0	1	1	no
Glyma0041s00210	Glyma0041s00210	Glyma0041s00210	scaffold_41:27189-31640	14-13-0	14-13-7	OK	2.40032	5.73258	1.25595	-2.14645	0.0318367	0.205061	no
Glyma0041s00225	Glyma0041s00225	Glyma0041s00225	scaffold_41:41035-42513	14-13-0	14-13-7	NOTEST	0	0	0	0	1	1	no
Glyma0041s00240	Glyma0041s00240	Glyma0041s00240	scaffold_41:45959-49258	14-13-0	14-13-7	OK	0.487773	6.00467	3.6218	-4.48462	7.30428e-06	0.000590613	yes
Glyma0041s00260	Glyma0041s00260	Glyma0041s00260	scaffold_41:61732-66813	14-13-0	14-13-7	OK	3.25626	3.35641	0.0437032	-0.0699714	0.944216	0.988963	no
Glyma0041s00271	Glyma0041s00271	Glyma0041s00271	scaffold_41:70024-73638	14-13-0	14-13-7	OK	0.972202	2.37104	1.28619	-1.55228	0.120594	0.425267	no
Glyma0041s00280	Glyma0041s00280	Glyma0041s00280	scaffold_41:74056-78241	14-13-0	14-13-7	OK	3.92924	3.03022	-0.374829	0.582119	0.560487	0.848537	no
Glyma0041s00290	Glyma0041s00290	Glyma0041s00290	scaffold_41:85372-94695	14-13-0	14-13-7	OK	5.07278	1.68754	-1.58785	2.59508	0.00945695	0.101566	no
Glyma0041s00300	Glyma0041s00300	Glyma0041s00300	scaffold_41:96315-98827	14-13-0	14-13-7	OK	20.6952	8.25468	-1.32601	2.26963	0.0232299	0.171309	no
Glyma0041s00310	Glyma0041s00310	Glyma0041s00310	scaffold_41:111899-114096	14-13-0	14-13-7	NOTEST	0.122436	0.264698	1.11232	-0.895712	0.370407	1	no
Glyma0041s00331	Glyma0041s00331	Glyma0041s00331	scaffold_41:122453-123227	14-13-0	14-13-7	NOTEST	0	0	0	0	1	1	no
Glyma0041s00350	Glyma0041s00350	Glyma0041s00350	scaffold_41:149673-152360	14-13-0	14-13-7	NOTEST	0.214759	0.102667	-1.06474	0.907373	0.364209	1	no
Glyma0041s00360	Glyma0041s00360	Glyma0041s00360	scaffold_41:165449-171887	14-13-0	14-13-7	NOTEST	0	0	0	0	1	1	no
Glyma0041s50	Glyma0041s50	Glyma0041s50	scaffold_41:4320-9458	14-13-0	14-13-7	NOTEST	0.114637	0.175195	0.611887	-0.641451	0.52123	1	no
Glyma0042s100	Glyma0042s100	Glyma0042s100	scaffold_42:281628-284115	14-13-0	14-13-7	OK	3.10831	1.95882	-0.666142	0.776362	0.437535	0.77518	no
Glyma0042s50	Glyma0042s50	Glyma0042s50	scaffold_42:265872-271658	14-13-0	14-13-7	NOTEST	0	0	0	0	1	1	no
Glyma0048s00220	Glyma0048s00220	Glyma0048s00220	scaffold_48:756-13042	14-13-0	14-13-7	NOTEST	0	0	0	0	1	1	no
Glyma0048s00230	Glyma0048s00230	Glyma0048s00230	scaffold_48:13316-18869	14-13-0	14-13-7	OK	0.882215	1.30811	0.56828	-0.124911	0.900594	0.978741	no
Glyma0048s00240	Glyma0048s00240	Glyma0048s00240	scaffold_48:13316-18869	14-13-0	14-13-7	OK	3.70303	3.61916	-0.0330504	0.0561594	0.955215	0.990881	no
Glyma0048s00250	Glyma0048s00250	Glyma0048s00250	scaffold_48:24012-27245	14-13-0	14-13-7	OK	58.4823	33.4173	-0.807403	1.23938	0.215204	0.564076	no
Glyma0048s00260	Glyma0048s00260	Glyma0048s00260	scaffold_48:30256-31906	14-13-0	14-13-7	OK	1.04363	0.655724	-0.670448	0.8237	0.41011	0.754158	no
Glyma0048s00270	Glyma0048s00270	Glyma0048s00270	scaffold_48:32191-38154	14-13-0	14-13-7	OK	20.8024	6.99398	-1.57256	2.64741	0.00811105	0.0936599	no
Glyma0048s00280	Glyma0048s00280	Glyma0048s00280	scaffold_48:41005-46815	14-13-0	14-13-7	OK	6.70825	4.83289	-0.473053	0.777018	0.437148	0.774883	no
Glyma0048s00290	Glyma0048s00290	Glyma0048s00290	scaffold_48:51746-58457	14-13-0	14-13-7	OK	20.5887	13.9859	-0.557879	0.919377	0.357898	0.711377	no
Glyma0048s00300	Glyma0048s00300	Glyma0048s00300	scaffold_48:62047-65487	14-13-0	14-13-7	OK	39.6067	37.1489	-0.0924235	0.127615	0.898454	0.978385	no
Glyma0048s00305	Glyma0048s00305	Glyma0048s00305	scaffold_48:62047-65487	14-13-0	14-13-7	OK	2.39013	2.00779	-0.251477	0.0694452	0.944635	0.988987	no
Glyma0048s00310	Glyma0048s00310	Glyma0048s00310	scaffold_48:73905-75284	14-13-0	14-13-7	NOTEST	0	0.119348	1.79769e+308	1.79769e+308	0.0387476	1	no
Glyma0048s00320	Glyma0048s00320	Glyma0048s00320	scaffold_48:78264-89175	14-13-0	14-13-7	OK	3.89197	2.52733	-0.62289	0.998185	0.318189	0.676585	no
Glyma0048s00330	Glyma0048s00330	Glyma0048s00330	scaffold_48:92831-93821	14-13-0	14-13-7	OK	7.39256	8.88322	0.265009	-0.437509	0.661742	0.896407	no
Glyma0048s00340	Glyma0048s00340	Glyma0048s00340	scaffold_48:93959-105291	14-13-0	14-13-7	OK	4.3215	3.64146	-0.247014	0.420252	0.674301	0.901312	no
Glyma0048s00350	Glyma0048s00350	Glyma0048s00350	scaffold_48:115208-118892	14-13-0	14-13-7	NOTEST	0	0	0	0	1	1	no
Glyma0048s50	Glyma0048s50	Glyma0048s50	scaffold_48:756-13042	14-13-0	14-13-7	OK	1.55403	0.906873	-0.777046	1.11533	0.264708	0.624114	no
Glyma0053s100	Glyma0053s100	Glyma0053s100	scaffold_53:40277-44576	14-13-0	14-13-7	NOTEST	0	0	0	0	1	1	no
Glyma0053s150	Glyma0053s150	Glyma0053s150	scaffold_53:60537-64721	14-13-0	14-13-7	NOTEST	0	0	0	0	1	1	no
Glyma0053s200	Glyma0053s200	Glyma0053s200	scaffold_53:96299-97317	14-13-0	14-13-7	NOTEST	0	0	0	0	1	1	no
Glyma0053s50	Glyma0053s50	Glyma0053s50	scaffold_53:1663-6177	14-13-0	14-13-7	NOTEST	0	0	0	0	1	1	no
Glyma0057s100	Glyma0057s100	Glyma0057s100	scaffold_57:113347-115364	14-13-0	14-13-7	OK	0.850692	0.615855	-0.466046	0.412067	0.68029	0.903568	no
Glyma0057s50	Glyma0057s50	Glyma0057s50	scaffold_57:98459-99986	14-13-0	14-13-7	NOTEST	0	0	0	0	1	1	no
Glyma0060s00220	Glyma0060s00220	Glyma0060s00220	scaffold_60:12548-13243	14-13-0	14-13-7	NOTEST	0	0	0	0	1	1	no
Glyma0060s00320	Glyma0060s00320	Glyma0060s00320	scaffold_60:67387-68707	14-13-0	14-13-7	NOTEST	0	0	0	0	1	1	no
Glyma0060s00370	Glyma0060s00370	Glyma0060s00370	scaffold_60:104356-106210	14-13-0	14-13-7	NOTEST	0	0	0	0	1	1	no
Glyma0066s50	Glyma0066s50	Glyma0066s50	scaffold_66:161914-164286	14-13-0	14-13-7	NOTEST	0	0	0	0	1	1	no
Glyma0067s50	Glyma0067s50	Glyma0067s50	scaffold_67:44433-45302	14-13-0	14-13-7	NOTEST	0	0	0	0	1	1	no
Glyma0070s50	Glyma0070s50	Glyma0070s50	scaffold_70:35574-40055	14-13-0	14-13-7	OK	1.01635	1.50327	0.56471	-0.689397	0.490573	0.80933	no
Glyma0079s00200	Glyma0079s00200	Glyma0079s00200	scaffold_79:9482-9737	14-13-0	14-13-7	NOTEST	0	0	0	0	1	1	no
Glyma0079s00210	Glyma0079s00210	Glyma0079s00210	scaffold_79:16304-17051	14-13-0	14-13-7	OK	0.464569	1.23963	1.41595	-1.39363	0.163431	0.496614	no
Glyma0079s00220	Glyma0079s00220	Glyma0079s00220	scaffold_79:17736-18009	14-13-0	14-13-7	OK	0	0.760122	1.79769e+308	1.79769e+308	0.196186	0.540868	no
Glyma0079s00230	Glyma0079s00230	Glyma0079s00230	scaffold_79:18723-19596	14-13-0	14-13-7	NOTEST	0	0.22112	1.79769e+308	1.79769e+308	0.0481527	1	no
Glyma0079s00240	Glyma0079s00240	Glyma0079s00240	scaffold_79:20660-20912	14-13-0	14-13-7	OK	0	1.10578	1.79769e+308	1.79769e+308	0.196186	0.540868	no
Glyma0079s00250	Glyma0079s00250	Glyma0079s00250	scaffold_79:20961-21240	14-13-0	14-13-7	OK	0	0.567247	1.79769e+308	1.79769e+308	0.196186	0.540868	no
Glyma0079s00261	Glyma0079s00261	Glyma0079s00261	scaffold_79:22053-22326	14-13-0	14-13-7	NOTEST	0	0	0	0	1	1	no
Glyma0079s00270	Glyma0079s00270	Glyma0079s00270	scaffold_79:25288-26862	14-13-0	14-13-7	NOTEST	0	0.0258141	1.79769e+308	1.79769e+308	0.196186	1	no
Glyma0079s00280	Glyma0079s00280	Glyma0079s00280	scaffold_79:27077-28537	14-13-0	14-13-7	NOTEST	0	0	0	0	1	1	no
Glyma0079s00290	Glyma0079s00290	Glyma0079s00290	scaffold_79:30187-34025	14-13-0	14-13-7	OK	0.0807661	0.501973	2.63579	-2.74633	0.00602665	0.0785669	no
Glyma0079s00295	Glyma0079s00295	Glyma0079s00295	scaffold_79:54681-55767	14-13-0	14-13-7	NOTEST	0	0	0	0	1	1	no
Glyma0079s00300	Glyma0079s00300	Glyma0079s00300	scaffold_79:56320-57461	14-13-0	14-13-7	NOTEST	0	0	0	0	1	1	no
Glyma0079s00311	Glyma0079s00311	Glyma0079s00311	scaffold_79:123336-123591	14-13-0	14-13-7	NOTEST	0	0	0	0	1	1	no
Glyma0079s00320	Glyma0079s00320	Glyma0079s00320	scaffold_79:127744-128017	14-13-0	14-13-7	NOTEST	0	0.262915	1.79769e+308	1.79769e+308	0.310716	1	no
Glyma0079s00330	Glyma0079s00330	Glyma0079s00330	scaffold_79:128776-129055	14-13-0	14-13-7	OK	0.650125	0.576293	-0.173914	0.0764719	0.939044	0.987821	no
Glyma0079s00340	Glyma0079s00340	Glyma0079s00340	scaffold_79:161645-161951	14-13-0	14-13-7	NOTEST	0	0	0	0	1	1	no
Glyma0079s00350	Glyma0079s00350	Glyma0079s00350	scaffold_79:164291-164540	14-13-0	14-13-7	OK	0	1.18248	1.79769e+308	1.79769e+308	0.196186	0.540868	no
Glyma0079s00360	Glyma0079s00360	Glyma0079s00360	scaffold_79:165133-166200	14-13-0	14-13-7	OK	0.0401353	2.08431	5.69855	-3.08984	0.00200262	0.0393065	yes
Glyma0079s00370	Glyma0079s00370	Glyma0079s00370	scaffold_79:167220-167502	14-13-0	14-13-7	OK	0	0.69893	1.79769e+308	1.79769e+308	0.196186	0.540868	no
Glyma0080s50	Glyma0080s50	Glyma0080s50	scaffold_80:33970-43733	14-13-0	14-13-7	NOTEST	0.27882	0.197783	-0.495417	0.468797	0.639214	1	no
Glyma0084s00210	Glyma0084s00210	Glyma0084s00210	scaffold_84:12274-20446	14-13-0	14-13-7	OK	108.054	130.359	0.270732	-0.361082	0.718038	0.917506	no
Glyma0084s00230	Glyma0084s00230	Glyma0084s00230	scaffold_84:53420-54224	14-13-0	14-13-7	NOTEST	0	0	0	0	1	1	no
Glyma0086s00200	Glyma0086s00200	Glyma0086s00200	scaffold_86:18942-19924	14-13-0	14-13-7	NOTEST	0	0	0	0	1	1	no
Glyma0086s00250	Glyma0086s00250	Glyma0086s00250	scaffold_86:40393-43241	14-13-0	14-13-7	NOTEST	0	0	0	0	1	1	no
Glyma0086s00300	Glyma0086s00300	Glyma0086s00300	scaffold_86:91106-93419	14-13-0	14-13-7	NOTEST	0	0	0	0	1	1	no
Glyma0090s00200	Glyma0090s00200	Glyma0090s00200	scaffold_90:4631-8816	14-13-0	14-13-7	OK	0.132695	0.415627	1.64718	-1.85404	0.0637329	0.301108	no
Glyma0090s00250	Glyma0090s00250	Glyma0090s00250	scaffold_90:22827-24762	14-13-0	14-13-7	NOTEST	0.0920392	0.0326269	-1.49619	0.914446	0.360482	1	no
Glyma0090s00300	Glyma0090s00300	Glyma0090s00300	scaffold_90:24885-25615	14-13-0	14-13-7	OK	0	0.610335	1.79769e+308	1.79769e+308	0.0405195	0.234515	no
Glyma0090s00350	Glyma0090s00350	Glyma0090s00350	scaffold_90:44125-48952	14-13-0	14-13-7	NOTEST	0.125481	0.225142	0.843367	-0.926142	0.354372	1	no
Glyma0091s00230	Glyma0091s00230	Glyma0091s00230	scaffold_91:29255-30661	14-13-0	14-13-7	NOTEST	0	0	0	0	1	1	no
Glyma0092s00200	Glyma0092s00200	Glyma0092s00200	scaffold_92:4798-6418	14-13-0	14-13-7	OK	0.136478	1.00468	2.88	-2.86984	0.00410679	0.0617139	no
Glyma0092s00210	Glyma0092s00210	Glyma0092s00210	scaffold_92:9477-13080	14-13-0	14-13-7	OK	6.94259	3.16799	-1.13191	1.72353	0.0847926	0.352231	no
Glyma0092s00230	Glyma0092s00230	Glyma0092s00230	scaffold_92:31216-33044	14-13-0	14-13-7	OK	20.8054	32.6153	0.648592	-1.03885	0.298873	0.658622	no
Glyma0092s00240	Glyma0092s00240	Glyma0092s00240	scaffold_92:54198-55797	14-13-0	14-13-7	OK	14.4601	43.0711	1.57464	-2.47597	0.0132874	0.123781	no
Glyma0096s100	Glyma0096s100	Glyma0096s100	scaffold_96:83938-84651	14-13-0	14-13-7	NOTEST	0	0	0	0	1	1	no
Glyma0096s50	Glyma0096s50	Glyma0096s50	scaffold_96:24926-29013	14-13-0	14-13-7	NOTEST	0	0	0	0	1	1	no
Glyma0101s00200	Glyma0101s00200	Glyma0101s00200	scaffold_101:409-679	14-13-0	14-13-7	NOTEST	0	0	0	0	1	1	no
Glyma0101s00210	Glyma0101s00210	Glyma0101s00210	scaffold_101:1190-2295	14-13-0	14-13-7	NOTEST	0	0	0	0	1	1	no
Glyma0101s00230	Glyma0101s00230	Glyma0101s00230	scaffold_101:16731-19812	14-13-0	14-13-7	NOTEST	0	0	0	0	1	1	no
Glyma0101s00241	Glyma0101s00241	Glyma0101s00241	scaffold_101:20750-20975	14-13-0	14-13-7	NOTEST	0	0	0	0	1	1	no
Glyma0101s00251	Glyma0101s00251	Glyma0101s00251	scaffold_101:42209-42999	14-13-0	14-13-7	NOTEST	0	0	0	0	1	1	no
Glyma0101s00260	Glyma0101s00260	Glyma0101s00260	scaffold_101:49116-50221	14-13-0	14-13-7	NOTEST	0	0	0	0	1	1	no
Glyma0103s100	Glyma0103s100	Glyma0103s100	scaffold_103:35985-36595	14-13-0	14-13-7	OK	0.519394	0.789286	0.603718	-0.546558	0.584682	0.862749	no
Glyma0103s50	Glyma0103s50	Glyma0103s50	scaffold_103:19207-24805	14-13-0	14-13-7	OK	0.16425	0.744993	2.18133	-1.64477	0.100017	0.385204	no
Glyma0120s50	Glyma0120s50	Glyma0120s50	scaffold_120:55294-60491	14-13-0	14-13-7	NOTEST	0.019107	0	-1.79769e+308	-1.79769e+308	0.316026	1	no
Glyma0121s00200	Glyma0121s00200	Glyma0121s00200	scaffold_121:11730-14225	14-13-0	14-13-7	NOTEST	0	0	0	0	1	1	no
Glyma0121s00230	Glyma0121s00230	Glyma0121s00230	scaffold_121:28095-29760	14-13-0	14-13-7	NOTEST	0	0	0	0	1	1	no
Glyma0121s00240	Glyma0121s00240	Glyma0121s00240	scaffold_121:38140-41744	14-13-0	14-13-7	NOTEST	0.0210698	0.0661995	1.65164	-0.756311	0.449463	1	no
Glyma0128s50	Glyma0128s50	Glyma0128s50	scaffold_128:8755-9643	14-13-0	14-13-7	NOTEST	0	0	0	0	1	1	no
Glyma0146s00210	Glyma0146s00210	Glyma0146s00210	scaffold_146:13454-14636	14-13-0	14-13-7	NOTEST	0	0	0	0	1	1	no
Glyma0165s00200	Glyma0165s00200	Glyma0165s00200	scaffold_165:18150-20209	14-13-0	14-13-7	NOTEST	0.011632	0.0218036	0.906472	-0.240677	0.809806	1	no
Glyma0165s50	Glyma0165s50	Glyma0165s50	scaffold_165:12356-14234	14-13-0	14-13-7	NOTEST	0	0	0	0	1	1	no
Glyma0169s00200	Glyma0169s00200	Glyma0169s00200	scaffold_169:6036-7668	14-13-0	14-13-7	OK	99.177	21.3226	-2.21762	3.39449	0.000687558	0.0190585	yes
Glyma0169s00210	Glyma0169s00210	Glyma0169s00210	scaffold_169:10271-14284	14-13-0	14-13-7	OK	206.293	74.8825	-1.46199	1.82689	0.0677161	0.311651	no
Glyma0174s50	Glyma0174s50	Glyma0174s50	scaffold_174:28-832	14-13-0	14-13-7	OK	0.293739	0.408157	0.474591	-0.382426	0.702145	0.911976	no
Glyma0175s50	Glyma0175s50	Glyma0175s50	scaffold_175:15261-16399	14-13-0	14-13-7	NOTEST	0	0	0	0	1	1	no
Glyma0196s00210	Glyma0196s00210	Glyma0196s00210	scaffold_196:12292-15573	14-13-0	14-13-7	NOTEST	0.0809507	0.205039	1.34078	-1.27906	0.200878	1	no
Glyma0196s130	Glyma0196s130	Glyma0196s130	scaffold_196:9547-9835	14-13-0	14-13-7	NOTEST	0	0	0	0	1	1	no
Glyma0196s50	Glyma0196s50	Glyma0196s50	scaffold_196:6280-7448	14-13-0	14-13-7	OK	0.611885	0.175603	-1.80094	1.43011	0.152686	0.479295	no
Glyma01g00210	Glyma01g00210	Glyma01g00210	Gm01:27642-27977	14-13-0	14-13-7	OK	3.75689	7.21307	0.941074	-0.595223	0.551695	0.843469	no
Glyma01g00241	Glyma01g00241	Glyma01g00241	Gm01:28504-30546	14-13-0	14-13-7	NOTEST	0.3221	0.333362	0.0495776	-0.048473	0.961339	1	no
Glyma01g00270	Glyma01g00270	Glyma01g00270	Gm01:51480-61502	14-13-0	14-13-7	NOTEST	0.270381	0.0845793	-1.67662	1.43814	0.150393	1	no
Glyma01g00280	Glyma01g00280	Glyma01g00280	Gm01:61964-63428	14-13-0	14-13-7	NOTEST	0	0	0	0	1	1	no
Glyma01g00291	Glyma01g00291	Glyma01g00291	Gm01:69968-71359	14-13-0	14-13-7	OK	2.72717	2.18977	-0.316625	0.405885	0.684827	0.905528	no
Glyma01g00300	Glyma01g00300	Glyma01g00300	Gm01:90229-96102	14-13-0	14-13-7	OK	5.23547	3.07834	-0.766166	1.32067	0.186613	0.529894	no
Glyma01g00311	Glyma01g00311	Glyma01g00311	Gm01:111565-114809	14-13-0	14-13-7	NOTEST	0	0	0	0	1	1	no
Glyma01g00321	Glyma01g00321	Glyma01g00321	Gm01:116191-128024	14-13-0	14-13-7	OK	3.98651	3.30046	-0.272458	0.47233	0.636691	0.886214	no
Glyma01g00341	Glyma01g00341	Glyma01g00341	Gm01:143352-155722	14-13-0	14-13-7	OK	1.39841	1.08819	-0.361851	0.410488	0.681448	0.903833	no
Glyma01g00361	Glyma01g00361	Glyma01g00361	Gm01:157174-157917	14-13-0	14-13-7	NOTEST	0.085881	0.201989	1.23386	-0.806267	0.420089	1	no
Glyma01g00380	Glyma01g00380	Glyma01g00380	Gm01:170678-193544	14-13-0	14-13-7	OK	3.23715	3.83582	0.244812	-0.42217	0.672901	0.900656	no
Glyma01g00400	Glyma01g00400	Glyma01g00400	Gm01:196374-202050	14-13-0	14-13-7	OK	10.1654	7.24013	-0.489577	0.719031	0.472122	0.798372	no
Glyma01g00410	Glyma01g00410	Glyma01g00410	Gm01:205593-226050	14-13-0	14-13-7	OK	36.4017	9.48687	-1.94	2.88658	0.00389458	0.0598855	no
Glyma01g00420	Glyma01g00420	Glyma01g00420	Gm01:205593-226050	14-13-0	14-13-7	NOTEST	0.219	0.192732	-0.184335	0.0380703	0.969632	1	no
Glyma01g00430	Glyma01g00430	Glyma01g00430	Gm01:227158-238073	14-13-0	14-13-7	OK	34.7883	19.9082	-0.805238	1.11479	0.26494	0.62439	no
Glyma01g00440	Glyma01g00440	Glyma01g00440	Gm01:244255-244600	14-13-0	14-13-7	NOTEST	0	0	0	0	1	1	no
Glyma01g00450	Glyma01g00450	Glyma01g00450	Gm01:247079-274310	14-13-0	14-13-7	NOTEST	0	0	0	0	1	1	no
Glyma01g00460	Glyma01g00460	Glyma01g00460	Gm01:247079-274310	14-13-0	14-13-7	OK	2.32892	1.35325	-0.783228	0.890427	0.373237	0.724574	no
Glyma01g00470	Glyma01g00470	Glyma01g00470	Gm01:247079-274310	14-13-0	14-13-7	OK	5.34858	3.23685	-0.724563	0.951984	0.341105	0.697594	no
Glyma01g00481	Glyma01g00481	Glyma01g00481	Gm01:275569-278576	14-13-0	14-13-7	NOTEST	0	0.0813595	1.79769e+308	1.79769e+308	0.0342161	1	no
Glyma01g00490	Glyma01g00490	Glyma01g00490	Gm01:281068-285680	14-13-0	14-13-7	NOTEST	0	0	0	0	1	1	no
Glyma01g00500	Glyma01g00500	Glyma01g00500	Gm01:285991-288741	14-13-0	14-13-7	OK	94.5461	131.17	0.472353	-0.695185	0.486939	0.808002	no
Glyma01g00510	Glyma01g00510	Glyma01g00510	Gm01:291440-297515	14-13-0	14-13-7	OK	2.87242	8.71506	1.60124	-2.59724	0.0093975	0.101184	no
Glyma01g00520	Glyma01g00520	Glyma01g00520	Gm01:303945-308194	14-13-0	14-13-7	OK	1.99964	3.78958	0.922295	-1.2183	0.223111	0.575129	no
Glyma01g00530	Glyma01g00530	Glyma01g00530	Gm01:318581-323172	14-13-0	14-13-7	NOTEST	0	0	0	0	1	1	no
Glyma01g00541	Glyma01g00541	Glyma01g00541	Gm01:329083-331923	14-13-0	14-13-7	OK	3.99115	6.054	0.601084	-0.942403	0.345986	0.70128	no
Glyma01g00551	Glyma01g00551	Glyma01g00551	Gm01:333453-334355	14-13-0	14-13-7	NOTEST	0	0	0	0	1	1	no
Glyma01g00560	Glyma01g00560	Glyma01g00560	Gm01:335231-337098	14-13-0	14-13-7	OK	7.0123	8.46768	0.272078	-0.474653	0.635034	0.885197	no
Glyma01g00570	Glyma01g00570	Glyma01g00570	Gm01:339899-343391	14-13-0	14-13-7	OK	29.6891	15.6253	-0.926046	1.58622	0.112689	0.411484	no
Glyma01g00580	Glyma01g00580	Glyma01g00580	Gm01:344017-344620	14-13-0	14-13-7	NOTEST	0	0	0	0	1	1	no
Glyma01g00590	Glyma01g00590	Glyma01g00590	Gm01:346489-350011	14-13-0	14-13-7	OK	53.214	18.3221	-1.53822	2.59327	0.00950674	0.101862	no
Glyma01g00600	Glyma01g00600	Glyma01g00600	Gm01:363275-365404	14-13-0	14-13-7	OK	14.529	3.22095	-2.17338	3.57138	0.00035511	0.0118318	yes
Glyma01g00610	Glyma01g00610	Glyma01g00610	Gm01:369322-375842	14-13-0	14-13-7	OK	8.65794	4.89276	-0.823377	0.931248	0.351725	0.706437	no
Glyma01g00620	Glyma01g00620	Glyma01g00620	Gm01:369322-375842	14-13-0	14-13-7	NOTEST	0.0816294	0.065629	-0.314754	0.0548747	0.956238	1	no
Glyma01g00640	Glyma01g00640	Glyma01g00640	Gm01:380015-381810	14-13-0	14-13-7	OK	9.29345	7.8356	-0.246172	0.429032	0.6679	0.899031	no
Glyma01g00660	Glyma01g00660	Glyma01g00660	Gm01:384777-386898	14-13-0	14-13-7	NOTEST	0	0	0	0	1	1	no
Glyma01g00670	Glyma01g00670	Glyma01g00670	Gm01:387855-391000	14-13-0	14-13-7	OK	3.49076	1.53722	-1.18322	1.86503	0.0621777	0.296635	no
Glyma01g00680	Glyma01g00680	Glyma01g00680	Gm01:391564-396978	14-13-0	14-13-7	OK	3.64372	2.7014	-0.431705	0.68465	0.493565	0.810961	no
Glyma01g00690	Glyma01g00690	Glyma01g00690	Gm01:397383-400581	14-13-0	14-13-7	OK	11.6834	6.18065	-0.918625	1.34923	0.177263	0.516689	no
Glyma01g00700	Glyma01g00700	Glyma01g00700	Gm01:411261-413277	14-13-0	14-13-7	NOTEST	0	0	0	0	1	1	no
Glyma01g00710	Glyma01g00710	Glyma01g00710	Gm01:415321-417655	14-13-0	14-13-7	NOTEST	0.0810787	0.138287	0.770274	-0.487193	0.626122	1	no
Glyma01g00720	Glyma01g00720	Glyma01g00720	Gm01:418762-423973	14-13-0	14-13-7	OK	1.57191	2.3347	0.570713	-0.967896	0.333096	0.690175	no
Glyma01g00730	Glyma01g00730	Glyma01g00730	Gm01:425499-427881	14-13-0	14-13-7	OK	4.41982	3.43364	-0.364248	0.466526	0.640839	0.887065	no
Glyma01g00740	Glyma01g00740	Glyma01g00740	Gm01:429463-430748	14-13-0	14-13-7	OK	139.792	44.0066	-1.6675	2.49335	0.0126545	0.119692	no
Glyma01g00750	Glyma01g00750	Glyma01g00750	Gm01:431176-433062	14-13-0	14-13-7	NOTEST	0.106784	0.0774557	-0.463247	0.380431	0.703626	1	no
Glyma01g00760	Glyma01g00760	Glyma01g00760	Gm01:434429-437563	14-13-0	14-13-7	OK	17.9057	17.8515	-0.00437084	0.0068809	0.99451	0.998529	no
Glyma01g00771	Glyma01g00771	Glyma01g00771	Gm01:438390-439678	14-13-0	14-13-7	OK	3.41316	3.46095	0.0200602	-0.0286178	0.977169	0.996374	no
Glyma01g00780	Glyma01g00780	Glyma01g00780	Gm01:441913-445194	14-13-0	14-13-7	OK	0.535478	0.343329	-0.641235	0.67359	0.500572	0.814234	no
Glyma01g00790	Glyma01g00790	Glyma01g00790	Gm01:446961-452958	14-13-0	14-13-7	NOTEST	0.0190037	0	-1.79769e+308	-1.79769e+308	0.123372	1	no
Glyma01g00805	Glyma01g00805	Glyma01g00805	Gm01:457615-459673	14-13-0	14-13-7	NOTEST	0	0.0493613	1.79769e+308	1.79769e+308	0.113214	1	no
Glyma01g00820	Glyma01g00820	Glyma01g00820	Gm01:464651-466721	14-13-0	14-13-7	OK	2.17882	7.74203	1.82917	-3.05543	0.0022474	0.0425039	yes
Glyma01g00840	Glyma01g00840	Glyma01g00840	Gm01:505341-508290	14-13-0	14-13-7	NOTEST	0.0516637	0.24495	2.24526	-1.30308	0.192548	1	no
Glyma01g00850	Glyma01g00850	Glyma01g00850	Gm01:512025-517266	14-13-0	14-13-7	OK	3.6246	3.92505	0.114889	-0.19995	0.84152	0.962596	no
Glyma01g00860	Glyma01g00860	Glyma01g00860	Gm01:518296-520313	14-13-0	14-13-7	OK	10.3316	11.6455	0.172709	-0.283005	0.777173	0.940082	no
Glyma01g00870	Glyma01g00870	Glyma01g00870	Gm01:523808-529106	14-13-0	14-13-7	OK	12.8665	39.465	1.61695	-2.14689	0.0318024	0.20492	no
Glyma01g00880	Glyma01g00880	Glyma01g00880	Gm01:544620-550750	14-13-0	14-13-7	OK	0.261229	0.462086	0.822845	-0.840808	0.400456	0.745922	no
Glyma01g00890	Glyma01g00890	Glyma01g00890	Gm01:559624-561661	14-13-0	14-13-7	OK	0.0312169	0.460919	3.88411	-2.80327	0.00505872	0.0707027	no
Glyma01g00900	Glyma01g00900	Glyma01g00900	Gm01:562674-567038	14-13-0	14-13-7	NOTEST	0	0	0	0	1	1	no
Glyma01g00910	Glyma01g00910	Glyma01g00910	Gm01:567202-572032	14-13-0	14-13-7	NOTEST	0.0250995	0.323802	3.68938	-2.64789	0.0080997	1	no
Glyma01g00920	Glyma01g00920	Glyma01g00920	Gm01:576437-580149	14-13-0	14-13-7	NOTEST	0	0	0	0	1	1	no
Glyma01g00930	Glyma01g00930	Glyma01g00930	Gm01:585699-587056	14-13-0	14-13-7	OK	0.491593	8.977	4.1907	-5.1373	2.78712e-07	4.16211e-05	yes
Glyma01g00940	Glyma01g00940	Glyma01g00940	Gm01:588160-598604	14-13-0	14-13-7	OK	33.8733	18.2556	-0.891804	1.36028	0.17374	0.512487	no
Glyma01g00950	Glyma01g00950	Glyma01g00950	Gm01:598924-599925	14-13-0	14-13-7	OK	0.749572	9.15919	3.61108	-4.77405	1.80554e-06	0.000196693	yes
Glyma01g00960	Glyma01g00960	Glyma01g00960	Gm01:604191-612760	14-13-0	14-13-7	OK	10.9756	6.61392	-0.730723	1.18413	0.23636	0.592487	no
Glyma01g00975	Glyma01g00975	Glyma01g00975	Gm01:613982-641941	14-13-0	14-13-7	OK	1.24789	2.03376	0.704661	-1.15883	0.246526	0.604856	no
Glyma01g00990	Glyma01g00990	Glyma01g00990	Gm01:643213-651111	14-13-0	14-13-7	OK	2.15233	3.04946	0.502656	-0.874794	0.381686	0.730913	no
Glyma01g01000	Glyma01g01000	Glyma01g01000	Gm01:652294-658333	14-13-0	14-13-7	OK	25.5839	13.177	-0.957213	1.40084	0.161261	0.49311	no
Glyma01g01010	Glyma01g01010	Glyma01g01010	Gm01:663901-668594	14-13-0	14-13-7	OK	0.394584	0.119356	-1.72505	1.54937	0.121292	0.426459	no
Glyma01g01020	Glyma01g01020	Glyma01g01020	Gm01:670826-674335	14-13-0	14-13-7	OK	40.4171	22.512	-0.844274	1.36647	0.171792	0.5092	no
Glyma01g01030	Glyma01g01030	Glyma01g01030	Gm01:681416-683646	14-13-0	14-13-7	NOTEST	0.124041	0.150808	0.281901	-0.259365	0.795354	1	no
Glyma01g01050	Glyma01g01050	Glyma01g01050	Gm01:706987-708399	14-13-0	14-13-7	NOTEST	0.109539	0.282018	1.36435	-1.26197	0.206959	1	no
Glyma01g01060	Glyma01g01060	Glyma01g01060	Gm01:729658-735082	14-13-0	14-13-7	OK	11.366	6.7771	-0.745991	1.2142	0.22467	0.576759	no
Glyma01g01070	Glyma01g01070	Glyma01g01070	Gm01:735854-740661	14-13-0	14-13-7	NOTEST	0.0505053	0.0947912	0.908319	-0.755171	0.450146	1	no
Glyma01g01080	Glyma01g01080	Glyma01g01080	Gm01:741674-745361	14-13-0	14-13-7	OK	0.778755	1.21192	0.638056	-0.961496	0.336303	0.692872	no
Glyma01g01090	Glyma01g01090	Glyma01g01090	Gm01:746504-750472	14-13-0	14-13-7	NOTEST	0.0168843	0.0178832	0.0829204	-0.048084	0.961649	1	no
Glyma01g01101	Glyma01g01101	Glyma01g01101	Gm01:752181-756473	14-13-0	14-13-7	NOTEST	0	0	0	0	1	1	no
Glyma01g01110	Glyma01g01110	Glyma01g01110	Gm01:757751-761280	14-13-0	14-13-7	OK	7.34804	2.83323	-1.37491	2.35398	0.0185736	0.149636	no
Glyma01g01120	Glyma01g01120	Glyma01g01120	Gm01:762982-771636	14-13-0	14-13-7	OK	0.462912	0.478151	0.0467279	-0.0601523	0.952034	0.990098	no
Glyma01g01130	Glyma01g01130	Glyma01g01130	Gm01:773986-783534	14-13-0	14-13-7	NOTEST	0	0	0	0	1	1	no
Glyma01g01140	Glyma01g01140	Glyma01g01140	Gm01:773986-783534	14-13-0	14-13-7	OK	3.17922	3.14798	-0.0142459	0.0214855	0.982858	0.997056	no
Glyma01g01150	Glyma01g01150	Glyma01g01150	Gm01:786786-790850	14-13-0	14-13-7	OK	0.4266	0.406232	-0.0705806	0.0769534	0.938661	0.987794	no
Glyma01g01160	Glyma01g01160	Glyma01g01160	Gm01:801794-812173	14-13-0	14-13-7	NOTEST	0.0413119	0	-1.79769e+308	-1.79769e+308	0.0414546	1	no
Glyma01g01165	Glyma01g01165	Glyma01g01165	Gm01:813195-815449	14-13-0	14-13-7	NOTEST	0	0	0	0	1	1	no
Glyma01g01170	Glyma01g01170	Glyma01g01170	Gm01:817680-822876	14-13-0	14-13-7	OK	2.77613	1.82319	-0.606607	0.857677	0.391071	0.739463	no
Glyma01g01180	Glyma01g01180	Glyma01g01180	Gm01:826828-831862	14-13-0	14-13-7	OK	46.0874	71.469	0.632946	-0.807272	0.41951	0.761325	no
Glyma01g01190	Glyma01g01190	Glyma01g01190	Gm01:837437-839839	14-13-0	14-13-7	OK	14.7685	12.2825	-0.265922	0.423569	0.67188	0.900402	no
Glyma01g01210	Glyma01g01210	Glyma01g01210	Gm01:841603-854009	14-13-0	14-13-7	OK	0.0743017	0.464873	2.64537	-2.75808	0.00581418	0.0770699	no
Glyma01g01220	Glyma01g01220	Glyma01g01220	Gm01:861697-864316	14-13-0	14-13-7	OK	14.2109	7.60263	-0.902429	1.38388	0.166396	0.501554	no
Glyma01g01230	Glyma01g01230	Glyma01g01230	Gm01:864945-873519	14-13-0	14-13-7	OK	2.2328	2.3275	0.0599268	-0.101768	0.918941	0.983018	no
Glyma01g01240	Glyma01g01240	Glyma01g01240	Gm01:882373-883583	14-13-0	14-13-7	OK	1.14228	1.08786	-0.0704228	0.0880013	0.929876	0.986061	no
Glyma01g01251	Glyma01g01251	Glyma01g01251	Gm01:897328-899783	14-13-0	14-13-7	NOTEST	0.0218601	0.021906	0.00302774	-0.00141549	0.998871	1	no
Glyma01g01260	Glyma01g01260	Glyma01g01260	Gm01:901470-902792	14-13-0	14-13-7	OK	65.3118	37.7328	-0.791524	1.23241	0.217796	0.568142	no
Glyma01g01270	Glyma01g01270	Glyma01g01270	Gm01:908126-916913	14-13-0	14-13-7	OK	13.2183	9.94165	-0.410984	0.685731	0.492883	0.810781	no
Glyma01g01280	Glyma01g01280	Glyma01g01280	Gm01:919766-925870	14-13-0	14-13-7	OK	1.20439	2.16434	0.845622	-1.40222	0.160851	0.492398	no
Glyma01g01291	Glyma01g01291	Glyma01g01291	Gm01:934414-936646	14-13-0	14-13-7	OK	0.115309	1.31863	3.51546	-3.29217	0.000994165	0.0244863	yes
Glyma01g01300	Glyma01g01300	Glyma01g01300	Gm01:937313-940538	14-13-0	14-13-7	OK	1.08962	0.665264	-0.711827	0.871576	0.38344	0.732584	no
Glyma01g01310	Glyma01g01310	Glyma01g01310	Gm01:952468-956652	14-13-0	14-13-7	OK	0.507914	1.21756	1.26134	-1.68894	0.0912303	0.366947	no
Glyma01g01330	Glyma01g01330	Glyma01g01330	Gm01:959531-963281	14-13-0	14-13-7	OK	13.9433	9.57418	-0.542346	0.938572	0.34795	0.70264	no
Glyma01g01340	Glyma01g01340	Glyma01g01340	Gm01:966937-971332	14-13-0	14-13-7	OK	18.789	7.85657	-1.25792	2.14197	0.0321962	0.206494	no
Glyma01g01350	Glyma01g01350	Glyma01g01350	Gm01:972898-978372	14-13-0	14-13-7	OK	3.41768	1.21286	-1.49461	2.06535	0.0388903	0.22873	no
Glyma01g01360	Glyma01g01360	Glyma01g01360	Gm01:980271-987366	14-13-0	14-13-7	OK	3.26287	2.85007	-0.195146	0.333	0.739135	0.924846	no
Glyma01g01365	Glyma01g01365	Glyma01g01365	Gm01:991596-992349	14-13-0	14-13-7	NOTEST	0	0	0	0	1	1	no
Glyma01g01370	Glyma01g01370	Glyma01g01370	Gm01:992662-997177	14-13-0	14-13-7	OK	1765.37	655.526	-1.42925	1.2839	0.199177	0.544227	no
Glyma01g01380	Glyma01g01380	Glyma01g01380	Gm01:1000826-1006591	14-13-0	14-13-7	OK	14.3731	9.90528	-0.537105	0.872326	0.383031	0.732273	no
Glyma01g01390	Glyma01g01390	Glyma01g01390	Gm01:1008758-1013501	14-13-0	14-13-7	OK	17.5327	8.28524	-1.08143	1.78718	0.0739088	0.326218	no
Glyma01g01400	Glyma01g01400	Glyma01g01400	Gm01:1018233-1021659	14-13-0	14-13-7	OK	8.9341	3.30503	-1.43466	2.4304	0.0150822	0.133656	no
Glyma01g01410	Glyma01g01410	Glyma01g01410	Gm01:1023044-1025742	14-13-0	14-13-7	OK	91.2577	40.3241	-1.1783	1.86052	0.0628119	0.298244	no
Glyma01g01420	Glyma01g01420	Glyma01g01420	Gm01:1028982-1033386	14-13-0	14-13-7	NOTEST	0	0	0	0	1	1	no
Glyma01g01431	Glyma01g01431	Glyma01g01431	Gm01:1035987-1043507	14-13-0	14-13-7	OK	1.63535	1.17479	-0.4772	0.720218	0.471391	0.798017	no
Glyma01g01440	Glyma01g01440	Glyma01g01440	Gm01:1047147-1051040	14-13-0	14-13-7	OK	15.571	7.57129	-1.04025	1.6087	0.107683	0.400618	no
Glyma01g01450	Glyma01g01450	Glyma01g01450	Gm01:1052601-1053493	14-13-0	14-13-7	OK	0.67363	1.88728	1.48628	-1.63926	0.101159	0.387328	no
Glyma01g01460	Glyma01g01460	Glyma01g01460	Gm01:1056819-1061665	14-13-0	14-13-7	OK	14.3165	6.23306	-1.19966	2.06198	0.0392095	0.229944	no
Glyma01g01470	Glyma01g01470	Glyma01g01470	Gm01:1066130-1073350	14-13-0	14-13-7	OK	3.83426	4.44681	0.213822	-0.37295	0.709186	0.91464	no
Glyma01g01480	Glyma01g01480	Glyma01g01480	Gm01:1088031-1090516	14-13-0	14-13-7	OK	21.255	13.3874	-0.666923	1.06682	0.286052	0.645533	no
Glyma01g01491	Glyma01g01491	Glyma01g01491	Gm01:1091316-1094909	14-13-0	14-13-7	OK	0.617154	0.647238	0.0686638	-0.0782691	0.937614	0.987654	no
Glyma01g01500	Glyma01g01500	Glyma01g01500	Gm01:1095456-1099007	14-13-0	14-13-7	NOTEST	0	0.23506	1.79769e+308	1.79769e+308	0.0221024	1	no
Glyma01g01510	Glyma01g01510	Glyma01g01510	Gm01:1125596-1130365	14-13-0	14-13-7	NOTEST	0.0570557	0.0614039	0.105957	-0.0834949	0.933458	1	no
Glyma01g01521	Glyma01g01521	Glyma01g01521	Gm01:1133845-1137317	14-13-0	14-13-7	OK	1.09561	0.912833	-0.263308	0.327663	0.743167	0.926093	no
Glyma01g01530	Glyma01g01530	Glyma01g01530	Gm01:1138207-1139962	14-13-0	14-13-7	NOTEST	0	0.0917835	1.79769e+308	1.79769e+308	0.0692411	1	no
Glyma01g01550	Glyma01g01550	Glyma01g01550	Gm01:1143928-1150404	14-13-0	14-13-7	OK	0.112755	2.06527	4.19507	-4.84133	1.28975e-06	0.000150027	yes
Glyma01g01560	Glyma01g01560	Glyma01g01560	Gm01:1160591-1165098	14-13-0	14-13-7	OK	0.055511	0.680656	3.61608	-3.93342	8.37443e-05	0.00404494	yes
Glyma01g01570	Glyma01g01570	Glyma01g01570	Gm01:1165649-1171110	14-13-0	14-13-7	OK	0.0545714	6.81639	6.96472	-7.02058	2.20957e-12	2.21974e-09	yes
Glyma01g01580	Glyma01g01580	Glyma01g01580	Gm01:1185427-1188776	14-13-0	14-13-7	NOTEST	0	0.018503	1.79769e+308	1.79769e+308	0.196186	1	no
Glyma01g01590	Glyma01g01590	Glyma01g01590	Gm01:1196921-1198375	14-13-0	14-13-7	OK	8.97815	4.72428	-0.926322	1.18019	0.237926	0.594581	no
Glyma01g01601	Glyma01g01601	Glyma01g01601	Gm01:1201663-1205929	14-13-0	14-13-7	OK	15.7538	12.6962	-0.311307	0.528538	0.597126	0.868404	no
Glyma01g01610	Glyma01g01610	Glyma01g01610	Gm01:1207927-1212597	14-13-0	14-13-7	OK	8.41045	6.91553	-0.282343	0.484369	0.628124	0.881981	no
Glyma01g01620	Glyma01g01620	Glyma01g01620	Gm01:1215172-1220713	14-13-0	14-13-7	NOTEST	0.122562	0.0757836	-0.693549	0.532701	0.594241	1	no
Glyma01g01630	Glyma01g01630	Glyma01g01630	Gm01:1224165-1228877	14-13-0	14-13-7	NOTEST	0	0	0	0	1	1	no
Glyma01g01641	Glyma01g01641	Glyma01g01641	Gm01:1231917-1233070	14-13-0	14-13-7	NOTEST	0	0	0	0	1	1	no
Glyma01g01651	Glyma01g01651	Glyma01g01651	Gm01:1235950-1236741	14-13-0	14-13-7	OK	0	3.18302	1.79769e+308	1.79769e+308	0.0035437	0.0563753	no
Glyma01g01661	Glyma01g01661	Glyma01g01661	Gm01:1237990-1239189	14-13-0	14-13-7	OK	9.02746	9.93574	0.138307	-0.118199	0.90591	0.980081	no
Glyma01g01671	Glyma01g01671	Glyma01g01671	Gm01:1237990-1239189	14-13-0	14-13-7	OK	3.09304	2.09455	-0.562383	0.328632	0.742434	0.925976	no
Glyma01g01680	Glyma01g01680	Glyma01g01680	Gm01:1241352-1245024	14-13-0	14-13-7	NOTEST	0	0.031616	1.79769e+308	1.79769e+308	0.0508685	1	no
Glyma01g01690	Glyma01g01690	Glyma01g01690	Gm01:1252980-1257657	14-13-0	14-13-7	NOTEST	0	0	0	0	1	1	no
Glyma01g01700	Glyma01g01700	Glyma01g01700	Gm01:1273194-1280313	14-13-0	14-13-7	NOTEST	0	0	0	0	1	1	no
Glyma01g01715	Glyma01g01715	Glyma01g01715	Gm01:1283531-1285362	14-13-0	14-13-7	NOTEST	0	0	0	0	1	1	no
Glyma01g01730	Glyma01g01730	Glyma01g01730	Gm01:1289360-1298217	14-13-0	14-13-7	OK	2.01728	3.09319	0.616684	-1.01886	0.308271	0.667001	no
Glyma01g01740	Glyma01g01740	Glyma01g01740	Gm01:1307387-1317730	14-13-0	14-13-7	OK	2.61132	3.90202	0.579438	-0.916889	0.359201	0.712619	no
Glyma01g01750	Glyma01g01750	Glyma01g01750	Gm01:1319394-1322259	14-13-0	14-13-7	OK	1.86917	1.50447	-0.313141	0.508954	0.610785	0.874238	no
Glyma01g01770	Glyma01g01770	Glyma01g01770	Gm01:1332992-1336611	14-13-0	14-13-7	OK	6.86085	3.97734	-0.786581	1.20569	0.227939	0.580967	no
Glyma01g01780	Glyma01g01780	Glyma01g01780	Gm01:1342969-1347966	14-13-0	14-13-7	OK	0.180013	0.460103	1.35386	-1.46525	0.142853	0.463255	no
Glyma01g01790	Glyma01g01790	Glyma01g01790	Gm01:1357260-1362758	14-13-0	14-13-7	OK	0.376364	0.643197	0.77313	-0.823535	0.410204	0.754289	no
Glyma01g01805	Glyma01g01805	Glyma01g01805	Gm01:1377132-1387290	14-13-0	14-13-7	OK	3.87171	3.13783	-0.303204	0.465343	0.641686	0.887203	no
Glyma01g01820	Glyma01g01820	Glyma01g01820	Gm01:1391664-1392341	14-13-0	14-13-7	NOTEST	0	0	0	0	1	1	no
Glyma01g01830	Glyma01g01830	Glyma01g01830	Gm01:1394336-1398687	14-13-0	14-13-7	OK	25.1174	14.8598	-0.757272	1.22921	0.218992	0.570131	no
Glyma01g01840	Glyma01g01840	Glyma01g01840	Gm01:1399714-1403226	14-13-0	14-13-7	OK	2.74054	2.56805	-0.0937858	0.120136	0.904375	0.979879	no
Glyma01g01850	Glyma01g01850	Glyma01g01850	Gm01:1409321-1416077	14-13-0	14-13-7	OK	0.458798	0.77029	0.747542	-1.01934	0.308042	0.666696	no
Glyma01g01860	Glyma01g01860	Glyma01g01860	Gm01:1432595-1439227	14-13-0	14-13-7	OK	2.37976	2.99247	0.330519	-0.524148	0.600176	0.869958	no
Glyma01g01875	Glyma01g01875	Glyma01g01875	Gm01:1464340-1468599	14-13-0	14-13-7	OK	5.71314	5.42153	-0.0755839	0.123336	0.901841	0.979099	no
Glyma01g01890	Glyma01g01890	Glyma01g01890	Gm01:1483775-1488285	14-13-0	14-13-7	OK	26.6778	13.0809	-1.02818	1.6813	0.0927049	0.370015	no
Glyma01g01900	Glyma01g01900	Glyma01g01900	Gm01:1489317-1495820	14-13-0	14-13-7	OK	14.5658	22.249	0.611157	-0.824868	0.409446	0.753439	no
Glyma01g01910	Glyma01g01910	Glyma01g01910	Gm01:1500824-1504087	14-13-0	14-13-7	OK	188.423	88.7705	-1.08582	1.14236	0.253303	0.611572	no
Glyma01g01920	Glyma01g01920	Glyma01g01920	Gm01:1504880-1510358	14-13-0	14-13-7	NOTEST	0.121725	0.203131	0.73878	-0.779218	0.435851	1	no
Glyma01g01930	Glyma01g01930	Glyma01g01930	Gm01:1511111-1512857	14-13-0	14-13-7	OK	2.55857	2.35516	-0.119514	0.138244	0.890047	0.976297	no
Glyma01g01940	Glyma01g01940	Glyma01g01940	Gm01:1514417-1515781	14-13-0	14-13-7	OK	15.7108	15.691	-0.00182154	0.00316979	0.997471	0.99931	no
Glyma01g01950	Glyma01g01950	Glyma01g01950	Gm01:1520439-1523995	14-13-0	14-13-7	OK	15.0604	11.6135	-0.374952	0.648433	0.516705	0.82404	no
Glyma01g01960	Glyma01g01960	Glyma01g01960	Gm01:1526003-1531395	14-13-0	14-13-7	OK	1.77499	1.65431	-0.101587	0.149715	0.88099	0.97365	no
Glyma01g01970	Glyma01g01970	Glyma01g01970	Gm01:1532782-1536385	14-13-0	14-13-7	OK	1.06264	1.68095	0.661621	-0.616635	0.537475	0.836015	no
Glyma01g01980	Glyma01g01980	Glyma01g01980	Gm01:1537139-1538153	14-13-0	14-13-7	NOTEST	0	0.0345706	1.79769e+308	1.79769e+308	0.196186	1	no
Glyma01g01990	Glyma01g01990	Glyma01g01990	Gm01:1540562-1544363	14-13-0	14-13-7	OK	4.49695	4.94714	0.137646	-0.240469	0.809966	0.952807	no
Glyma01g02020	Glyma01g02020	Glyma01g02020	Gm01:1547972-1555699	14-13-0	14-13-7	LOWDATA	0	0	-1.79769e+308	0	1	1	no
Glyma01g02031	Glyma01g02031	Glyma01g02031	Gm01:1547972-1555699	14-13-0	14-13-7	NOTEST	0.244194	0.227653	-0.10119	0.121923	0.90296	1	no
Glyma01g02040	Glyma01g02040	Glyma01g02040	Gm01:1558849-1560186	14-13-0	14-13-7	OK	3.07852	2.16283	-0.509318	0.646668	0.517847	0.824445	no
Glyma01g02050	Glyma01g02050	Glyma01g02050	Gm01:1564664-1568931	14-13-0	14-13-7	OK	1.56639	1.99594	0.349628	-0.450345	0.652462	0.891607	no
Glyma01g02060	Glyma01g02060	Glyma01g02060	Gm01:1577696-1587475	14-13-0	14-13-7	OK	12.496	9.2013	-0.441552	0.686805	0.492206	0.810491	no
Glyma01g02070	Glyma01g02070	Glyma01g02070	Gm01:1596899-1599449	14-13-0	14-13-7	OK	0	0.394345	1.79769e+308	1.79769e+308	0.0171277	0.14287	no
Glyma01g02080	Glyma01g02080	Glyma01g02080	Gm01:1603349-1604459	14-13-0	14-13-7	NOTEST	0	0	0	0	1	1	no
Glyma01g02090	Glyma01g02090	Glyma01g02090	Gm01:1613117-1616592	14-13-0	14-13-7	OK	19.2248	18.7385	-0.0369683	0.0618393	0.950691	0.989737	no
Glyma01g02100	Glyma01g02100	Glyma01g02100	Gm01:1618639-1623534	14-13-0	14-13-7	OK	4.8981	4.30673	-0.185628	0.324237	0.745758	0.926991	no
Glyma01g02110	Glyma01g02110	Glyma01g02110	Gm01:1626846-1628287	14-13-0	14-13-7	OK	3.5638	6.06447	0.766964	-1.09605	0.273057	0.633033	no
Glyma01g02120	Glyma01g02120	Glyma01g02120	Gm01:1633690-1637207	14-13-0	14-13-7	OK	16.337	10.0055	-0.707347	1.22185	0.221766	0.573804	no
Glyma01g02130	Glyma01g02130	Glyma01g02130	Gm01:1642576-1643443	14-13-0	14-13-7	NOTEST	0	0	0	0	1	1	no
Glyma01g02140	Glyma01g02140	Glyma01g02140	Gm01:1648084-1649989	14-13-0	14-13-7	NOTEST	0.119591	0.268802	1.16844	-0.98738	0.323456	1	no
Glyma01g02150	Glyma01g02150	Glyma01g02150	Gm01:1653306-1656923	14-13-0	14-13-7	OK	44.9345	35.8238	-0.326905	0.500121	0.61699	0.876744	no
Glyma01g02160	Glyma01g02160	Glyma01g02160	Gm01:1662473-1663732	14-13-0	14-13-7	OK	0	0.414717	1.79769e+308	1.79769e+308	0.0445687	0.24675	no
Glyma01g02171	Glyma01g02171	Glyma01g02171	Gm01:1673102-1673545	14-13-0	14-13-7	OK	0	0.55251	1.79769e+308	1.79769e+308	0.0523416	0.269837	no
Glyma01g02180	Glyma01g02180	Glyma01g02180	Gm01:1688059-1691046	14-13-0	14-13-7	OK	29.7723	16.6946	-0.834586	1.32474	0.185256	0.527947	no
Glyma01g02190	Glyma01g02190	Glyma01g02190	Gm01:1721264-1722533	14-13-0	14-13-7	OK	8.48247	5.63941	-0.588941	0.927446	0.353695	0.708117	no
Glyma01g02200	Glyma01g02200	Glyma01g02200	Gm01:1733389-1734562	14-13-0	14-13-7	OK	9.13236	7.9034	-0.208514	0.360881	0.718188	0.917506	no
Glyma01g02215	Glyma01g02215	Glyma01g02215	Gm01:1735229-1736763	14-13-0	14-13-7	OK	10.4286	71.0667	2.76863	-4.1948	2.73111e-05	0.00171895	yes
Glyma01g02230	Glyma01g02230	Glyma01g02230	Gm01:1744296-1745378	14-13-0	14-13-7	OK	24.6541	21.4572	-0.200366	0.345353	0.729829	0.921314	no
Glyma01g02235	Glyma01g02235	Glyma01g02235	Gm01:1747643-1748703	14-13-0	14-13-7	NOTEST	0	0.171467	1.79769e+308	1.79769e+308	0.196186	1	no
Glyma01g02240	Glyma01g02240	Glyma01g02240	Gm01:1748705-1753242	14-13-0	14-13-7	OK	1.47287	1.1207	-0.39423	0.605071	0.545132	0.840451	no
Glyma01g02251	Glyma01g02251	Glyma01g02251	Gm01:1771935-1773875	14-13-0	14-13-7	OK	21.4163	29.2613	0.450286	-0.676739	0.498571	0.813137	no
Glyma01g02260	Glyma01g02260	Glyma01g02260	Gm01:1781864-1782671	14-13-0	14-13-7	NOTEST	0.085695	0.0908507	0.0842865	-0.0488761	0.961018	1	no
Glyma01g02270	Glyma01g02270	Glyma01g02270	Gm01:1782704-1786280	14-13-0	14-13-7	OK	1.32644	2.60377	0.973042	-1.08439	0.278193	0.638555	no
Glyma01g02280	Glyma01g02280	Glyma01g02280	Gm01:1788990-1791158	14-13-0	14-13-7	OK	4.91371	5.10834	0.0560434	-0.0971366	0.922618	0.984085	no
Glyma01g02290	Glyma01g02290	Glyma01g02290	Gm01:1803011-1804370	14-13-0	14-13-7	OK	6.80674	3.86828	-0.815273	1.36585	0.171985	0.509465	no
Glyma01g02295	Glyma01g02295	Glyma01g02295	Gm01:1813531-1816390	14-13-0	14-13-7	NOTEST	0	0	0	0	1	1	no
Glyma01g02300	Glyma01g02300	Glyma01g02300	Gm01:1817115-1820935	14-13-0	14-13-7	NOTEST	0.175536	0.306383	0.80357	-0.797438	0.425197	1	no
Glyma01g02310	Glyma01g02310	Glyma01g02310	Gm01:1822915-1823629	14-13-0	14-13-7	NOTEST	0	0	0	0	1	1	no
Glyma01g02321	Glyma01g02321	Glyma01g02321	Gm01:1825753-1835393	14-13-0	14-13-7	OK	12.1085	10.461	-0.211003	0.31959	0.749279	0.928346	no
Glyma01g02330	Glyma01g02330	Glyma01g02330	Gm01:1838125-1845872	14-13-0	14-13-7	OK	1.2278	0.967667	-0.343492	0.511064	0.609306	0.873564	no
Glyma01g02340	Glyma01g02340	Glyma01g02340	Gm01:1865275-1868142	14-13-0	14-13-7	OK	1.38116	1.95325	0.500001	-0.809263	0.418364	0.760311	no
Glyma01g02350	Glyma01g02350	Glyma01g02350	Gm01:1886187-1890464	14-13-0	14-13-7	OK	5.11576	5.62244	0.136247	-0.212799	0.831484	0.960463	no
Glyma01g02360	Glyma01g02360	Glyma01g02360	Gm01:1905414-1906471	14-13-0	14-13-7	OK	8.62826	1.98975	-2.11648	3.07539	0.00210225	0.0405668	yes
Glyma01g02380	Glyma01g02380	Glyma01g02380	Gm01:1929549-1932204	14-13-0	14-13-7	OK	0.653767	0.470332	-0.475095	0.592594	0.553453	0.844608	no
Glyma01g02390	Glyma01g02390	Glyma01g02390	Gm01:1940680-1942652	14-13-0	14-13-7	OK	1.7396	1.05041	-0.7278	0.922043	0.356506	0.710612	no
Glyma01g02400	Glyma01g02400	Glyma01g02400	Gm01:1969464-1975586	14-13-0	14-13-7	OK	83.1051	113.696	0.45217	-0.497122	0.619103	0.877303	no
Glyma01g02420	Glyma01g02420	Glyma01g02420	Gm01:1977639-1982632	14-13-0	14-13-7	OK	5.50891	4.72311	-0.222029	0.383585	0.701286	0.911807	no
Glyma01g02435	Glyma01g02435	Glyma01g02435	Gm01:1989327-1993130	14-13-0	14-13-7	NOTEST	0	0	0	0	1	1	no
Glyma01g02451	Glyma01g02451	Glyma01g02451	Gm01:1998300-2009388	14-13-0	14-13-7	NOTEST	0	0.016786	1.79769e+308	1.79769e+308	0.329549	1	no
Glyma01g02465	Glyma01g02465	Glyma01g02465	Gm01:1998300-2009388	14-13-0	14-13-7	OK	6.46856	5.00031	-0.371429	0.460524	0.64514	0.88871	no
Glyma01g02480	Glyma01g02480	Glyma01g02480	Gm01:2010099-2018636	14-13-0	14-13-7	OK	48.801	34.2731	-0.509834	0.710504	0.477392	0.80201	no
Glyma01g02510	Glyma01g02510	Glyma01g02510	Gm01:2033797-2034792	14-13-0	14-13-7	NOTEST	0.227843	0.0802082	-1.50622	1.03577	0.30031	1	no
Glyma01g02525	Glyma01g02525	Glyma01g02525	Gm01:2038298-2054214	14-13-0	14-13-7	NOTEST	0	0	0	0	1	1	no
Glyma01g02540	Glyma01g02540	Glyma01g02540	Gm01:2065426-2066242	14-13-0	14-13-7	NOTEST	0	0	0	0	1	1	no
Glyma01g02550	Glyma01g02550	Glyma01g02550	Gm01:2067340-2068207	14-13-0	14-13-7	NOTEST	0	0	0	0	1	1	no
Glyma01g02560	Glyma01g02560	Glyma01g02560	Gm01:2089449-2097520	14-13-0	14-13-7	NOTEST	0.0694874	0.0246972	-1.49241	1.02627	0.304764	1	no
Glyma01g02570	Glyma01g02570	Glyma01g02570	Gm01:2102150-2107115	14-13-0	14-13-7	OK	4.36662	5.72827	0.391582	-0.663709	0.506877	0.817785	no
Glyma01g02580	Glyma01g02580	Glyma01g02580	Gm01:2119856-2122838	14-13-0	14-13-7	OK	0.693964	5.2619	2.92265	-4.05614	4.9891e-05	0.00271145	yes
Glyma01g02610	Glyma01g02610	Glyma01g02610	Gm01:2137616-2139436	14-13-0	14-13-7	OK	0.596594	0.689209	0.208191	-0.259036	0.795607	0.947209	no
Glyma01g02620	Glyma01g02620	Glyma01g02620	Gm01:2146050-2152449	14-13-0	14-13-7	NOTEST	0.0420572	0.0677939	0.688803	-0.614	0.539215	1	no
Glyma01g02630	Glyma01g02630	Glyma01g02630	Gm01:2156930-2161301	14-13-0	14-13-7	OK	5.16327	3.72553	-0.47084	0.788206	0.430576	0.770006	no
Glyma01g02640	Glyma01g02640	Glyma01g02640	Gm01:2168404-2173706	14-13-0	14-13-7	OK	4.80271	6.4444	0.424198	-0.720103	0.471461	0.798017	no
Glyma01g02660	Glyma01g02660	Glyma01g02660	Gm01:2184322-2188837	14-13-0	14-13-7	OK	8.54726	7.88629	-0.116115	0.187255	0.851461	0.96608	no
Glyma01g02670	Glyma01g02670	Glyma01g02670	Gm01:2192165-2194689	14-13-0	14-13-7	OK	11.9021	3.91636	-1.60364	2.727	0.00639132	0.0812799	no
Glyma01g02691	Glyma01g02691	Glyma01g02691	Gm01:2199760-2201127	14-13-0	14-13-7	OK	0.852696	0.611475	-0.479737	0.525251	0.599409	0.869868	no
Glyma01g02710	Glyma01g02710	Glyma01g02710	Gm01:2204078-2206129	14-13-0	14-13-7	NOTEST	0	0	0	0	1	1	no
Glyma01g02720	Glyma01g02720	Glyma01g02720	Gm01:2204078-2206129	14-13-0	14-13-7	OK	42.2167	35.7383	-0.24034	0.396543	0.691705	0.908348	no
Glyma01g02740	Glyma01g02740	Glyma01g02740	Gm01:2209772-2211864	14-13-0	14-13-7	NOTEST	0.11438	0.0916227	-0.320054	0.282577	0.777501	1	no
Glyma01g02750	Glyma01g02750	Glyma01g02750	Gm01:2228817-2234268	14-13-0	14-13-7	OK	0.68301	0.964887	0.498453	-0.658074	0.51049	0.819501	no
Glyma01g02760	Glyma01g02760	Glyma01g02760	Gm01:2239126-2244480	14-13-0	14-13-7	NOTEST	0.0690865	0.124937	0.85473	-0.769041	0.441869	1	no
Glyma01g02780	Glyma01g02780	Glyma01g02780	Gm01:2274285-2279870	14-13-0	14-13-7	OK	5.71437	10.6615	0.899742	-1.50367	0.132667	0.44462	no
Glyma01g02790	Glyma01g02790	Glyma01g02790	Gm01:2280412-2286189	14-13-0	14-13-7	OK	0.138236	0.906209	2.71271	-3.08933	0.00200611	0.0393065	yes
Glyma01g02800	Glyma01g02800	Glyma01g02800	Gm01:2289835-2296934	14-13-0	14-13-7	OK	2.21244	1.34797	-0.714851	1.04482	0.296107	0.655933	no
Glyma01g02810	Glyma01g02810	Glyma01g02810	Gm01:2296971-2301386	14-13-0	14-13-7	OK	0.0549772	0.456448	3.05355	-3.23657	0.00120976	0.0281446	yes
Glyma01g02820	Glyma01g02820	Glyma01g02820	Gm01:2307249-2310533	14-13-0	14-13-7	OK	11.4903	7.82381	-0.554467	0.965491	0.334299	0.691058	no
Glyma01g02830	Glyma01g02830	Glyma01g02830	Gm01:2320650-2323809	14-13-0	14-13-7	NOTEST	0	0	0	0	1	1	no
Glyma01g02840	Glyma01g02840	Glyma01g02840	Gm01:2324547-2332128	14-13-0	14-13-7	OK	21.6572	7.39551	-1.55013	2.35619	0.0184635	0.149003	no
Glyma01g02850	Glyma01g02850	Glyma01g02850	Gm01:2336135-2340956	14-13-0	14-13-7	OK	55.985	25.3029	-1.14574	1.52326	0.127694	0.436313	no
Glyma01g02880	Glyma01g02880	Glyma01g02880	Gm01:2360197-2366406	14-13-0	14-13-7	OK	12.2841	5.84421	-1.07171	1.57755	0.114669	0.414528	no
Glyma01g02890	Glyma01g02890	Glyma01g02890	Gm01:2373884-2395585	14-13-0	14-13-7	OK	2.03994	1.85361	-0.138192	0.238699	0.811339	0.953174	no
Glyma01g02900	Glyma01g02900	Glyma01g02900	Gm01:2398001-2407368	14-13-0	14-13-7	OK	1.24598	0.995677	-0.323527	0.404738	0.68567	0.905863	no
Glyma01g02920	Glyma01g02920	Glyma01g02920	Gm01:2419558-2420449	14-13-0	14-13-7	OK	1.90812	1.0432	-0.871144	1.09726	0.272529	0.632625	no
Glyma01g02930	Glyma01g02930	Glyma01g02930	Gm01:2424756-2426304	14-13-0	14-13-7	NOTEST	0.0613963	0.0665005	0.115212	-0.0668094	0.946733	1	no
Glyma01g02941	Glyma01g02941	Glyma01g02941	Gm01:2426753-2435682	14-13-0	14-13-7	OK	2.62862	2.18248	-0.268337	0.461136	0.644701	0.888585	no
Glyma01g02950	Glyma01g02950	Glyma01g02950	Gm01:2448362-2450139	14-13-0	14-13-7	OK	44.3246	52.2919	0.238479	-0.340665	0.733356	0.922982	no
Glyma01g02963	Glyma01g02963	Glyma01g02963	Gm01:2455817-2458234	14-13-0	14-13-7	NOTEST	0.0273093	0.0278219	0.0268289	-0.0138525	0.988948	1	no
Glyma01g02976	Glyma01g02976	Glyma01g02976	Gm01:2465269-2466518	14-13-0	14-13-7	NOTEST	0	0	0	0	1	1	no
Glyma01g02990	Glyma01g02990	Glyma01g02990	Gm01:2477179-2479230	14-13-0	14-13-7	OK	1.02286	4.32155	2.07894	-2.84292	0.00447028	0.0651137	no
Glyma01g03005	Glyma01g03005	Glyma01g03005	Gm01:2495435-2497366	14-13-0	14-13-7	NOTEST	0.0712993	0.334694	2.23088	-1.99236	0.0463315	1	no
Glyma01g03020	Glyma01g03020	Glyma01g03020	Gm01:2497579-2500150	14-13-0	14-13-7	OK	16.2155	10.064	-0.688178	1.19748	0.231119	0.585406	no
Glyma01g03030	Glyma01g03030	Glyma01g03030	Gm01:2522226-2524933	14-13-0	14-13-7	OK	1.99746	1.14395	-0.804144	1.14558	0.251968	0.610259	no
Glyma01g03040	Glyma01g03040	Glyma01g03040	Gm01:2530562-2537849	14-13-0	14-13-7	NOTEST	0.0673466	0.108722	0.690964	-0.566503	0.571052	1	no
Glyma01g03050	Glyma01g03050	Glyma01g03050	Gm01:2543533-2544636	14-13-0	14-13-7	NOTEST	0	0	0	0	1	1	no
Glyma01g03060	Glyma01g03060	Glyma01g03060	Gm01:2551019-2553294	14-13-0	14-13-7	NOTEST	0	0.289904	1.79769e+308	1.79769e+308	0.0134751	1	no
Glyma01g03070	Glyma01g03070	Glyma01g03070	Gm01:2585415-2586673	14-13-0	14-13-7	OK	281.245	304.358	0.113941	-0.138029	0.890218	0.976297	no
Glyma01g03090	Glyma01g03090	Glyma01g03090	Gm01:2600263-2605224	14-13-0	14-13-7	OK	8.62063	2.19468	-1.97379	3.25197	0.00114607	0.0273464	yes
Glyma01g03100	Glyma01g03100	Glyma01g03100	Gm01:2633476-2636259	14-13-0	14-13-7	OK	3.47579	6.83048	0.974646	-1.65829	0.097259	0.37978	no
Glyma01g03110	Glyma01g03110	Glyma01g03110	Gm01:2667742-2669323	14-13-0	14-13-7	NOTEST	0	0	0	0	1	1	no
Glyma01g03120	Glyma01g03120	Glyma01g03120	Gm01:2683531-2686001	14-13-0	14-13-7	OK	2.66456	4.76773	0.839405	-1.31972	0.186928	0.53029	no
Glyma01g03130	Glyma01g03130	Glyma01g03130	Gm01:2686762-2690092	14-13-0	14-13-7	OK	3.87197	4.3619	0.171888	-0.295884	0.767318	0.93619	no
Glyma01g03140	Glyma01g03140	Glyma01g03140	Gm01:2696508-2700015	14-13-0	14-13-7	LOWDATA	0	0	0.416007	0	1	1	no
Glyma01g03150	Glyma01g03150	Glyma01g03150	Gm01:2696508-2700015	14-13-0	14-13-7	OK	25.0095	33.3684	0.416007	-0.535256	0.592473	0.866769	no
Glyma01g03160	Glyma01g03160	Glyma01g03160	Gm01:2716401-2724818	14-13-0	14-13-7	OK	31.4118	8.08397	-1.95817	2.816	0.00486256	0.0688316	no
Glyma01g03180	Glyma01g03180	Glyma01g03180	Gm01:2725857-2728953	14-13-0	14-13-7	OK	54.3965	14.7341	-1.88435	2.9265	0.00342794	0.0553816	no
Glyma01g03190	Glyma01g03190	Glyma01g03190	Gm01:2731349-2739464	14-13-0	14-13-7	OK	2.71859	2.5971	-0.0659563	0.108424	0.91366	0.981754	no
Glyma01g03200	Glyma01g03200	Glyma01g03200	Gm01:2741979-2744444	14-13-0	14-13-7	NOTEST	0	0	0	0	1	1	no
Glyma01g03210	Glyma01g03210	Glyma01g03210	Gm01:2749285-2751625	14-13-0	14-13-7	OK	0.250598	0.724374	1.53136	-1.83181	0.0669802	0.309815	no
Glyma01g03220	Glyma01g03220	Glyma01g03220	Gm01:2752604-2755538	14-13-0	14-13-7	OK	6.25698	5.7648	-0.118195	0.206054	0.836749	0.961655	no
Glyma01g03240	Glyma01g03240	Glyma01g03240	Gm01:2765558-2766634	14-13-0	14-13-7	NOTEST	0	0.238541	1.79769e+308	1.79769e+308	0.0342161	1	no
Glyma01g03260	Glyma01g03260	Glyma01g03260	Gm01:2784884-2792465	14-13-0	14-13-7	OK	921.329	494.127	-0.898834	0.71072	0.477258	0.801969	no
Glyma01g03270	Glyma01g03270	Glyma01g03270	Gm01:2803081-2807357	14-13-0	14-13-7	OK	4.28087	4.4124	0.0436578	-0.073958	0.941044	0.988278	no
Glyma01g03281	Glyma01g03281	Glyma01g03281	Gm01:2811064-2811250	14-13-0	14-13-7	NOTEST	0	0	0	0	1	1	no
Glyma01g03290	Glyma01g03290	Glyma01g03290	Gm01:2814292-2814876	14-13-0	14-13-7	NOTEST	0	0	0	0	1	1	no
Glyma01g03301	Glyma01g03301	Glyma01g03301	Gm01:2815679-2817384	14-13-0	14-13-7	NOTEST	0	0	0	0	1	1	no
Glyma01g03310	Glyma01g03310	Glyma01g03310	Gm01:2820282-2822588	14-13-0	14-13-7	NOTEST	0	0	0	0	1	1	no
Glyma01g03321	Glyma01g03321	Glyma01g03321	Gm01:2825602-2830330	14-13-0	14-13-7	NOTEST	0	0	0	0	1	1	no
Glyma01g03330	Glyma01g03330	Glyma01g03330	Gm01:2836050-2840937	14-13-0	14-13-7	OK	4.58332	5.94019	0.374114	-0.646904	0.517694	0.824445	no
Glyma01g03340	Glyma01g03340	Glyma01g03340	Gm01:2843206-2846996	14-13-0	14-13-7	NOTEST	0	0.0277976	1.79769e+308	1.79769e+308	0.196186	1	no
Glyma01g03360	Glyma01g03360	Glyma01g03360	Gm01:2857640-2860816	14-13-0	14-13-7	OK	20.5131	5.03184	-2.02739	2.9527	0.00315008	0.0525976	no
Glyma01g03371	Glyma01g03371	Glyma01g03371	Gm01:2868081-2871591	14-13-0	14-13-7	NOTEST	0.275458	0.0748219	-1.8803	0.966892	0.333598	1	no
Glyma01g03380	Glyma01g03380	Glyma01g03380	Gm01:2872827-2875983	14-13-0	14-13-7	OK	8.06115	5.47798	-0.557341	0.934857	0.349862	0.704515	no
Glyma01g03390	Glyma01g03390	Glyma01g03390	Gm01:2879282-2884236	14-13-0	14-13-7	OK	0.948164	0.653953	-0.53595	0.704356	0.481211	0.804452	no
Glyma01g03400	Glyma01g03400	Glyma01g03400	Gm01:2895941-2899203	14-13-0	14-13-7	NOTEST	0.0384704	0.0623905	0.697576	-0.441212	0.659059	1	no
Glyma01g03410	Glyma01g03410	Glyma01g03410	Gm01:2907608-2911173	14-13-0	14-13-7	NOTEST	0	0	0	0	1	1	no
Glyma01g03420	Glyma01g03420	Glyma01g03420	Gm01:2912689-2918182	14-13-0	14-13-7	OK	1.29169	1.90734	0.562298	-0.792568	0.428029	0.76815	no
Glyma01g03430	Glyma01g03430	Glyma01g03430	Gm01:2918596-2922169	14-13-0	14-13-7	OK	11.4479	3.07204	-1.89781	2.98632	0.00282355	0.0491631	yes
Glyma01g03450	Glyma01g03450	Glyma01g03450	Gm01:2932298-2941083	14-13-0	14-13-7	NOTEST	0	0	0	0	1	1	no
Glyma01g03470	Glyma01g03470	Glyma01g03470	Gm01:2983533-2985063	14-13-0	14-13-7	OK	1.59436	1.54834	-0.042251	0.0507311	0.95954	0.991996	no
Glyma01g03480	Glyma01g03480	Glyma01g03480	Gm01:2985878-2990726	14-13-0	14-13-7	OK	1.38318	2.64069	0.932929	-1.43702	0.150712	0.475848	no
Glyma01g03490	Glyma01g03490	Glyma01g03490	Gm01:2997710-3004125	14-13-0	14-13-7	OK	4.64201	6.98455	0.589419	-1.01903	0.308191	0.666871	no
Glyma01g03500	Glyma01g03500	Glyma01g03500	Gm01:3020777-3022182	14-13-0	14-13-7	OK	6.13744	8.95866	0.545647	-0.948814	0.342715	0.698638	no
Glyma01g03530	Glyma01g03530	Glyma01g03530	Gm01:3043747-3048064	14-13-0	14-13-7	OK	13.9593	12.6426	-0.142926	0.240222	0.810158	0.952863	no
Glyma01g03540	Glyma01g03540	Glyma01g03540	Gm01:3063216-3065991	14-13-0	14-13-7	OK	10.11	8.78397	-0.202836	0.354292	0.72312	0.918976	no
Glyma01g03550	Glyma01g03550	Glyma01g03550	Gm01:3067764-3073752	14-13-0	14-13-7	OK	21.6259	11.3098	-0.935191	1.59994	0.109611	0.40466	no
Glyma01g03570	Glyma01g03570	Glyma01g03570	Gm01:3082363-3083185	14-13-0	14-13-7	OK	248.458	77.7021	-1.67698	2.2946	0.021756	0.164745	no
Glyma01g03580	Glyma01g03580	Glyma01g03580	Gm01:3090805-3093412	14-13-0	14-13-7	OK	0	1.41791	1.79769e+308	1.79769e+308	0.00429057	0.0635289	no
Glyma01g03590	Glyma01g03590	Glyma01g03590	Gm01:3106546-3108525	14-13-0	14-13-7	OK	16.7354	12.6511	-0.403642	0.684536	0.493637	0.810961	no
Glyma01g03600	Glyma01g03600	Glyma01g03600	Gm01:3114320-3119083	14-13-0	14-13-7	OK	9.05274	3.86503	-1.22788	1.75855	0.0786546	0.337511	no
Glyma01g03610	Glyma01g03610	Glyma01g03610	Gm01:3120584-3124029	14-13-0	14-13-7	OK	23.4651	11.9892	-0.968784	1.63229	0.102618	0.390585	no
Glyma01g03621	Glyma01g03621	Glyma01g03621	Gm01:3124253-3126137	14-13-0	14-13-7	OK	0.675702	0.293678	-1.20215	1.21296	0.225144	0.577523	no
Glyma01g03630	Glyma01g03630	Glyma01g03630	Gm01:3127061-3127831	14-13-0	14-13-7	NOTEST	0	0	0	0	1	1	no
Glyma01g03650	Glyma01g03650	Glyma01g03650	Gm01:3132200-3135385	14-13-0	14-13-7	OK	38.2305	30.4972	-0.326047	0.470968	0.637663	0.886252	no
Glyma01g03661	Glyma01g03661	Glyma01g03661	Gm01:3135687-3141621	14-13-0	14-13-7	NOTEST	0	0.0150973	1.79769e+308	1.79769e+308	0.388954	1	no
Glyma01g03670	Glyma01g03670	Glyma01g03670	Gm01:3144701-3145778	14-13-0	14-13-7	OK	0.445713	1.46689	1.71857	-1.9092	0.0562366	0.279861	no
Glyma01g03690	Glyma01g03690	Glyma01g03690	Gm01:3152038-3157769	14-13-0	14-13-7	NOTEST	0	0	0	0	1	1	no
Glyma01g03700	Glyma01g03700	Glyma01g03700	Gm01:3162858-3164334	14-13-0	14-13-7	OK	1.89998	1.96761	0.0504596	-0.0735703	0.941352	0.988278	no
Glyma01g03710	Glyma01g03710	Glyma01g03710	Gm01:3167711-3172458	14-13-0	14-13-7	OK	5.0259	3.76373	-0.41722	0.635197	0.5253	0.828523	no
Glyma01g03720	Glyma01g03720	Glyma01g03720	Gm01:3174000-3185126	14-13-0	14-13-7	OK	141.479	34.1257	-2.05166	2.50829	0.0121316	0.116677	no
Glyma01g03730	Glyma01g03730	Glyma01g03730	Gm01:3187344-3190927	14-13-0	14-13-7	OK	18.0045	8.72627	-1.04492	1.8	0.0718608	0.320809	no
Glyma01g03750	Glyma01g03750	Glyma01g03750	Gm01:3193903-3200492	14-13-0	14-13-7	OK	24.3662	12.8049	-0.928192	1.58953	0.111942	0.409708	no
Glyma01g03760	Glyma01g03760	Glyma01g03760	Gm01:3219159-3222449	14-13-0	14-13-7	OK	6.02373	8.2518	0.45405	-0.771909	0.440168	0.777104	no
Glyma01g03780	Glyma01g03780	Glyma01g03780	Gm01:3233213-3235819	14-13-0	14-13-7	OK	4.03728	2.48306	-0.701266	0.653965	0.513134	0.82145	no
Glyma01g03790	Glyma01g03790	Glyma01g03790	Gm01:3242605-3245458	14-13-0	14-13-7	NOTEST	0.0421947	0.101997	1.27339	-1.08157	0.279444	1	no
Glyma01g03810	Glyma01g03810	Glyma01g03810	Gm01:3249405-3255967	14-13-0	14-13-7	OK	12.9123	17.6488	0.450828	-0.56613	0.571305	0.855693	no
Glyma01g03820	Glyma01g03820	Glyma01g03820	Gm01:3263267-3267637	14-13-0	14-13-7	OK	2.96996	2.69173	-0.141909	0.233693	0.815223	0.95442	no
Glyma01g03830	Glyma01g03830	Glyma01g03830	Gm01:3283632-3286899	14-13-0	14-13-7	OK	11.9442	7.42075	-0.68667	1.19329	0.232754	0.587718	no
Glyma01g03850	Glyma01g03850	Glyma01g03850	Gm01:3312867-3318968	14-13-0	14-13-7	OK	1.59634	2.50507	0.650082	-0.926639	0.354114	0.708326	no
Glyma01g03870	Glyma01g03870	Glyma01g03870	Gm01:3327064-3332585	14-13-0	14-13-7	OK	2.7818	5.78811	1.05708	-1.81115	0.0701173	0.317342	no
Glyma01g03880	Glyma01g03880	Glyma01g03880	Gm01:3348917-3352335	14-13-0	14-13-7	OK	1.47685	1.47387	-0.00291428	0.0044079	0.996483	0.999045	no
Glyma01g03890	Glyma01g03890	Glyma01g03890	Gm01:3359534-3372620	14-13-0	14-13-7	OK	4.58262	5.02932	0.13419	-0.233574	0.815316	0.95442	no
Glyma01g03900	Glyma01g03900	Glyma01g03900	Gm01:3378305-3380122	14-13-0	14-13-7	NOTEST	0	0.23636	1.79769e+308	1.79769e+308	0.0212374	1	no
Glyma01g03910	Glyma01g03910	Glyma01g03910	Gm01:3381988-3384388	14-13-0	14-13-7	NOTEST	0.043493	0.347738	2.99914	-2.11241	0.0346512	1	no
Glyma01g03921	Glyma01g03921	Glyma01g03921	Gm01:3390102-3396781	14-13-0	14-13-7	NOTEST	0.0497243	0.162486	1.70829	-1.42739	0.153467	1	no
Glyma01g03930	Glyma01g03930	Glyma01g03930	Gm01:3400476-3411080	14-13-0	14-13-7	OK	29.1184	13.0205	-1.16115	1.77143	0.0764889	0.332983	no
Glyma01g03940	Glyma01g03940	Glyma01g03940	Gm01:3413504-3415979	14-13-0	14-13-7	OK	0.318795	0.632309	0.987999	-1.10811	0.267812	0.627521	no
Glyma01g03948	Glyma01g03948	Glyma01g03948	Gm01:3423773-3425166	14-13-0	14-13-7	OK	1.07593	1.62987	0.599166	-0.684276	0.493801	0.810961	no
Glyma01g03956	Glyma01g03956	Glyma01g03956	Gm01:3431068-3433014	14-13-0	14-13-7	OK	4.76657	4.12793	-0.207533	0.32076	0.748392	0.928092	no
Glyma01g03964	Glyma01g03964	Glyma01g03964	Gm01:3433091-3436594	14-13-0	14-13-7	OK	0.973928	0.947122	-0.0402636	0.0576412	0.954034	0.990348	no
Glyma01g03972	Glyma01g03972	Glyma01g03972	Gm01:3439667-3441084	14-13-0	14-13-7	NOTEST	0	0	0	0	1	1	no
Glyma01g03980	Glyma01g03980	Glyma01g03980	Gm01:3455191-3461955	14-13-0	14-13-7	OK	0.475782	0.841671	0.822957	-1.21529	0.224254	0.576227	no
Glyma01g04000	Glyma01g04000	Glyma01g04000	Gm01:3487914-3494204	14-13-0	14-13-7	OK	2.60694	2.61701	0.00556139	-0.00971439	0.992249	0.998224	no
Glyma01g04015	Glyma01g04015	Glyma01g04015	Gm01:3502393-3507947	14-13-0	14-13-7	NOTEST	0.204593	0.19286	-0.0852023	0.0764555	0.939057	1	no
Glyma01g04030	Glyma01g04030	Glyma01g04030	Gm01:3513144-3513438	14-13-0	14-13-7	NOTEST	0	0	0	0	1	1	no
Glyma01g04040	Glyma01g04040	Glyma01g04040	Gm01:3514698-3521382	14-13-0	14-13-7	OK	1.36341	1.08902	-0.324178	0.397659	0.690881	0.907992	no
Glyma01g04050	Glyma01g04050	Glyma01g04050	Gm01:3524004-3527778	14-13-0	14-13-7	OK	69.5609	32.6391	-1.09168	1.67975	0.0930053	0.37059	no
Glyma01g04060	Glyma01g04060	Glyma01g04060	Gm01:3533389-3537718	14-13-0	14-13-7	OK	5.50744	5.0654	-0.120706	0.203367	0.838848	0.962366	no
Glyma01g04070	Glyma01g04070	Glyma01g04070	Gm01:3541049-3543307	14-13-0	14-13-7	OK	12.1651	43.4773	1.83751	-3.08192	0.00205671	0.0400375	yes
Glyma01g04080	Glyma01g04080	Glyma01g04080	Gm01:3552334-3560811	14-13-0	14-13-7	OK	0.793532	0.704365	-0.171965	0.119473	0.904901	0.979879	no
Glyma01g04090	Glyma01g04090	Glyma01g04090	Gm01:3552334-3560811	14-13-0	14-13-7	OK	1.45035	6.70227	2.20825	-2.94429	0.00323698	0.0535758	no
Glyma01g04100	Glyma01g04100	Glyma01g04100	Gm01:3565109-3567816	14-13-0	14-13-7	OK	3.08282	2.93854	-0.0691517	0.114657	0.908717	0.980721	no
Glyma01g04107	Glyma01g04107	Glyma01g04107	Gm01:3570498-3572031	14-13-0	14-13-7	OK	1.33601	0.834603	-0.678769	0.804446	0.42114	0.762638	no
Glyma01g04114	Glyma01g04114	Glyma01g04114	Gm01:3573892-3576381	14-13-0	14-13-7	NOTEST	0	0	0	0	1	1	no
Glyma01g04122	Glyma01g04122	Glyma01g04122	Gm01:3576871-3579242	14-13-0	14-13-7	OK	0	0.529145	1.79769e+308	1.79769e+308	0.00911435	0.0996663	no
Glyma01g04130	Glyma01g04130	Glyma01g04130	Gm01:3588235-3590927	14-13-0	14-13-7	OK	17.9286	13.7626	-0.381502	0.634484	0.525765	0.828736	no
Glyma01g04140	Glyma01g04140	Glyma01g04140	Gm01:3593852-3595627	14-13-0	14-13-7	OK	5.90234	3.28429	-0.845708	1.34543	0.178485	0.518639	no
Glyma01g04151	Glyma01g04151	Glyma01g04151	Gm01:3601850-3604249	14-13-0	14-13-7	OK	2.5639	2.47526	-0.0507606	0.0798183	0.936382	0.987457	no
Glyma01g04160	Glyma01g04160	Glyma01g04160	Gm01:3614505-3619208	14-13-0	14-13-7	NOTEST	0.0956676	0	-1.79769e+308	-1.79769e+308	0.0614965	1	no
Glyma01g04170	Glyma01g04170	Glyma01g04170	Gm01:3622380-3627999	14-13-0	14-13-7	OK	22.2283	8.0182	-1.47105	2.08292	0.0372582	0.22328	no
Glyma01g04190	Glyma01g04190	Glyma01g04190	Gm01:3657972-3659933	14-13-0	14-13-7	OK	2.28282	3.08379	0.433888	-0.647585	0.517254	0.824304	no
Glyma01g04200	Glyma01g04200	Glyma01g04200	Gm01:3671722-3676091	14-13-0	14-13-7	NOTEST	0.0511676	0.0539799	0.0771912	-0.0661906	0.947226	1	no
Glyma01g04210	Glyma01g04210	Glyma01g04210	Gm01:3695969-3699966	14-13-0	14-13-7	LOWDATA	0	0	-1.79769e+308	0	1	1	no
Glyma01g04220	Glyma01g04220	Glyma01g04220	Gm01:3695969-3699966	14-13-0	14-13-7	OK	0.624811	0.679967	0.122045	-0.154094	0.877536	0.972623	no
Glyma01g04230	Glyma01g04230	Glyma01g04230	Gm01:3717479-3721262	14-13-0	14-13-7	OK	25.4839	7.21536	-1.82044	3.01669	0.00255554	0.0461604	yes
Glyma01g04241	Glyma01g04241	Glyma01g04241	Gm01:3734519-3735893	14-13-0	14-13-7	OK	0.520053	0.685599	0.398704	-0.448764	0.653602	0.892046	no
Glyma01g04250	Glyma01g04250	Glyma01g04250	Gm01:3750043-3752379	14-13-0	14-13-7	OK	1.52939	4.46952	1.54717	-2.46563	0.0136773	0.12597	no
Glyma01g04261	Glyma01g04261	Glyma01g04261	Gm01:3767622-3769840	14-13-0	14-13-7	NOTEST	0	0.0214542	1.79769e+308	1.79769e+308	0.196186	1	no
Glyma01g04270	Glyma01g04270	Glyma01g04270	Gm01:3770398-3790851	14-13-0	14-13-7	OK	15.9491	4.33502	-1.87936	2.7714	0.00558151	0.0752929	no
Glyma01g04285	Glyma01g04285	Glyma01g04285	Gm01:3792928-3793735	14-13-0	14-13-7	OK	1.56166	0.189975	-3.0392	2.62614	0.00863592	0.0969845	no
Glyma01g04300	Glyma01g04300	Glyma01g04300	Gm01:3800482-3805133	14-13-0	14-13-7	OK	2.44624	6.1992	1.34151	-2.08212	0.0373312	0.223596	no
Glyma01g04310	Glyma01g04310	Glyma01g04310	Gm01:3839061-3840278	14-13-0	14-13-7	NOTEST	0	0	0	0	1	1	no
Glyma01g04320	Glyma01g04320	Glyma01g04320	Gm01:3843990-3851452	14-13-0	14-13-7	OK	10.2938	6.51963	-0.658911	1.14618	0.25172	0.610231	no
Glyma01g04330	Glyma01g04330	Glyma01g04330	Gm01:3875178-3876239	14-13-0	14-13-7	OK	0.248317	0.570015	1.19882	-0.875146	0.381494	0.730833	no
Glyma01g04335	Glyma01g04335	Glyma01g04335	Gm01:3875178-3876239	14-13-0	14-13-7	OK	2.48968	4.22567	0.763219	-0.360864	0.718201	0.917506	no
Glyma01g04340	Glyma01g04340	Glyma01g04340	Gm01:3894968-3896837	14-13-0	14-13-7	OK	1.52048	0.774063	-0.974004	1.29964	0.193723	0.539887	no
Glyma01g04350	Glyma01g04350	Glyma01g04350	Gm01:3901049-3902869	14-13-0	14-13-7	OK	67.9743	4.3007	-3.98234	6.09847	1.07091e-09	4.09998e-07	yes
Glyma01g04361	Glyma01g04361	Glyma01g04361	Gm01:3905975-3906745	14-13-0	14-13-7	NOTEST	0	0	0	0	1	1	no
Glyma01g04370	Glyma01g04370	Glyma01g04370	Gm01:3910797-3912019	14-13-0	14-13-7	OK	2.34855	0	-1.79769e+308	-1.79769e+308	0.0015312	0.0328558	yes
Glyma01g04380	Glyma01g04380	Glyma01g04380	Gm01:3925166-3926952	14-13-0	14-13-7	OK	0.998082	1.74337	0.804649	-1.10618	0.268648	0.628084	no
Glyma01g04400	Glyma01g04400	Glyma01g04400	Gm01:3936729-3941417	14-13-0	14-13-7	OK	14.8327	17.3714	0.227937	-0.373178	0.709016	0.914541	no
Glyma01g04410	Glyma01g04410	Glyma01g04410	Gm01:3950636-3955032	14-13-0	14-13-7	OK	2.57413	2.14406	-0.263735	0.392481	0.694703	0.909338	no
Glyma01g04421	Glyma01g04421	Glyma01g04421	Gm01:3965515-3967099	14-13-0	14-13-7	OK	0.408866	0.466684	0.190818	-0.195051	0.845353	0.964083	no
Glyma01g04430	Glyma01g04430	Glyma01g04430	Gm01:3981173-3984324	14-13-0	14-13-7	NOTEST	0.0556585	0.177352	1.67194	-1.57554	0.115131	1	no
Glyma01g04440	Glyma01g04440	Glyma01g04440	Gm01:3984541-3989981	14-13-0	14-13-7	OK	3.20826	6.77163	1.07771	-1.71248	0.0868082	0.356529	no
Glyma01g04450	Glyma01g04450	Glyma01g04450	Gm01:3990476-3991986	14-13-0	14-13-7	OK	1.36599	1.02752	-0.410777	0.518158	0.604348	0.871318	no
Glyma01g04460	Glyma01g04460	Glyma01g04460	Gm01:3993484-3995564	14-13-0	14-13-7	OK	8.04396	10.2544	0.350271	-0.602406	0.546904	0.840972	no
Glyma01g04468	Glyma01g04468	Glyma01g04468	Gm01:4005281-4011408	14-13-0	14-13-7	OK	1.37341	0.607415	-1.17701	1.34131	0.17982	0.520479	no
Glyma01g04476	Glyma01g04476	Glyma01g04476	Gm01:4012612-4020206	14-13-0	14-13-7	OK	10.3869	8.07482	-0.363256	0.586293	0.557679	0.847069	no
Glyma01g04484	Glyma01g04484	Glyma01g04484	Gm01:4023641-4024312	14-13-0	14-13-7	OK	4.03742	3.01965	-0.419054	0.486157	0.626856	0.881283	no
Glyma01g04492	Glyma01g04492	Glyma01g04492	Gm01:4024327-4035566	14-13-0	14-13-7	OK	5.1007	7.01859	0.460485	-0.77458	0.438588	0.776091	no
Glyma01g04500	Glyma01g04500	Glyma01g04500	Gm01:4070066-4074636	14-13-0	14-13-7	OK	0.0961222	1.11795	3.53984	-4.00688	6.15273e-05	0.00316732	yes
Glyma01g04515	Glyma01g04515	Glyma01g04515	Gm01:4094045-4096371	14-13-0	14-13-7	OK	2.94842	2.33627	-0.335734	0.562986	0.573445	0.856552	no
Glyma01g04530	Glyma01g04530	Glyma01g04530	Gm01:4108620-4111438	14-13-0	14-13-7	OK	53.1262	18.938	-1.48814	2.22178	0.026298	0.18366	no
Glyma01g04545	Glyma01g04545	Glyma01g04545	Gm01:4119639-4119995	14-13-0	14-13-7	NOTEST	0	0	0	0	1	1	no
Glyma01g04560	Glyma01g04560	Glyma01g04560	Gm01:4134768-4138744	14-13-0	14-13-7	OK	2.43712	3.47146	0.510364	-0.734154	0.462855	0.791986	no
Glyma01g04570	Glyma01g04570	Glyma01g04570	Gm01:4140494-4144862	14-13-0	14-13-7	OK	8.74038	8.45108	-0.048561	0.0804489	0.93588	0.987457	no
Glyma01g04580	Glyma01g04580	Glyma01g04580	Gm01:4160568-4163236	14-13-0	14-13-7	OK	0.977631	2.34881	1.26457	-1.72684	0.0841964	0.350972	no
Glyma01g04590	Glyma01g04590	Glyma01g04590	Gm01:4190455-4199176	14-13-0	14-13-7	OK	0.731535	1.72502	1.23762	-1.99896	0.0456125	0.250065	no
Glyma01g04600	Glyma01g04600	Glyma01g04600	Gm01:4213202-4215294	14-13-0	14-13-7	OK	9.967	7.44228	-0.421414	0.709064	0.478285	0.802537	no
Glyma01g04610	Glyma01g04610	Glyma01g04610	Gm01:4217440-4221353	14-13-0	14-13-7	OK	1.66584	2.11056	0.341381	-0.503061	0.614921	0.875974	no
Glyma01g04616	Glyma01g04616	Glyma01g04616	Gm01:4234777-4236309	14-13-0	14-13-7	NOTEST	0	0	0	0	1	1	no
Glyma01g04623	Glyma01g04623	Glyma01g04623	Gm01:4248628-4253094	14-13-0	14-13-7	NOTEST	0	0.0492476	1.79769e+308	1.79769e+308	0.189664	1	no
Glyma01g04630	Glyma01g04630	Glyma01g04630	Gm01:4267486-4273671	14-13-0	14-13-7	OK	1.30806	0.626226	-1.06267	1.50122	0.133299	0.445702	no
Glyma01g04640	Glyma01g04640	Glyma01g04640	Gm01:4278592-4280521	14-13-0	14-13-7	NOTEST	0.0962543	0.103357	0.102709	-0.0880719	0.92982	1	no
Glyma01g04650	Glyma01g04650	Glyma01g04650	Gm01:4282743-4288290	14-13-0	14-13-7	NOTEST	0	0	0	0	1	1	no
Glyma01g04660	Glyma01g04660	Glyma01g04660	Gm01:4294494-4299400	14-13-0	14-13-7	OK	1.18096	1.42859	0.274638	-0.390054	0.696497	0.910194	no
Glyma01g04670	Glyma01g04670	Glyma01g04670	Gm01:4302121-4303918	14-13-0	14-13-7	OK	0.551155	2.09191	1.92429	-2.36936	0.017819	0.145969	no
Glyma01g04690	Glyma01g04690	Glyma01g04690	Gm01:4314360-4316230	14-13-0	14-13-7	OK	5.99654	12.2917	1.03548	-1.76574	0.0774398	0.33498	no
Glyma01g04700	Glyma01g04700	Glyma01g04700	Gm01:4319542-4321677	14-13-0	14-13-7	NOTEST	0	0	0	0	1	1	no
Glyma01g04710	Glyma01g04710	Glyma01g04710	Gm01:4323773-4325439	14-13-0	14-13-7	OK	418.869	73.8093	-2.50462	3.22445	0.00126214	0.0290127	yes
Glyma01g04720	Glyma01g04720	Glyma01g04720	Gm01:4331150-4337114	14-13-0	14-13-7	OK	3.35809	3.73917	0.15508	-0.261163	0.793967	0.946479	no
Glyma01g04730	Glyma01g04730	Glyma01g04730	Gm01:4347876-4356892	14-13-0	14-13-7	OK	2.05581	4.66648	1.18263	-1.99	0.0465912	0.253129	no
Glyma01g04740	Glyma01g04740	Glyma01g04740	Gm01:4358996-4361499	14-13-0	14-13-7	OK	3.67476	2.36739	-0.634351	1.00208	0.316304	0.674956	no
Glyma01g04750	Glyma01g04750	Glyma01g04750	Gm01:4367348-4370072	14-13-0	14-13-7	OK	0.249651	2.80805	3.49158	-4.0924	4.26924e-05	0.00241525	yes
Glyma01g04760	Glyma01g04760	Glyma01g04760	Gm01:4370091-4371490	14-13-0	14-13-7	OK	40.6502	23.8017	-0.772198	1.30429	0.192134	0.537583	no
Glyma01g04770	Glyma01g04770	Glyma01g04770	Gm01:4372756-4380517	14-13-0	14-13-7	NOTEST	0	0	0	0	1	1	no
Glyma01g04780	Glyma01g04780	Glyma01g04780	Gm01:4372756-4380517	14-13-0	14-13-7	NOTEST	0.358331	0.0197014	-4.18492	0.585952	0.557908	1	no
Glyma01g04791	Glyma01g04791	Glyma01g04791	Gm01:4372756-4380517	14-13-0	14-13-7	NOTEST	0.260643	0.233485	-0.158746	0.185927	0.852502	1	no
Glyma01g04800	Glyma01g04800	Glyma01g04800	Gm01:4381634-4382677	14-13-0	14-13-7	NOTEST	0	0	0	0	1	1	no
Glyma01g04810	Glyma01g04810	Glyma01g04810	Gm01:4398540-4400009	14-13-0	14-13-7	NOTEST	0	0	0	0	1	1	no
Glyma01g04820	Glyma01g04820	Glyma01g04820	Gm01:4406613-4412858	14-13-0	14-13-7	OK	14.4945	8.50444	-0.769218	1.26529	0.205766	0.552352	no
Glyma01g04830	Glyma01g04830	Glyma01g04830	Gm01:4435158-4439690	14-13-0	14-13-7	OK	25.3441	4.0719	-2.63788	4.29229	1.76839e-05	0.00122392	yes
Glyma01g04860	Glyma01g04860	Glyma01g04860	Gm01:4462980-4471168	14-13-0	14-13-7	OK	4.99159	3.3057	-0.594542	0.856698	0.391612	0.739856	no
Glyma01g04870	Glyma01g04870	Glyma01g04870	Gm01:4462980-4471168	14-13-0	14-13-7	NOTEST	0.0349665	0.0936546	1.42138	-0.232717	0.815981	1	no
Glyma01g04880	Glyma01g04880	Glyma01g04880	Gm01:4472509-4474524	14-13-0	14-13-7	OK	7.63274	9.80439	0.361227	-0.6213	0.534402	0.834542	no
Glyma01g04890	Glyma01g04890	Glyma01g04890	Gm01:4508033-4510800	14-13-0	14-13-7	OK	7.07281	31.0221	2.13294	-3.11622	0.00183186	0.0369627	yes
Glyma01g04895	Glyma01g04895	Glyma01g04895	Gm01:4537147-4539699	14-13-0	14-13-7	NOTEST	0	0	0	0	1	1	no
Glyma01g04900	Glyma01g04900	Glyma01g04900	Gm01:4581543-4588129	14-13-0	14-13-7	OK	6.46781	2.95675	-1.12926	1.81174	0.0700266	0.317191	no
Glyma01g04920	Glyma01g04920	Glyma01g04920	Gm01:4591469-4596424	14-13-0	14-13-7	OK	35.4743	23.8052	-0.575497	0.809018	0.418505	0.7604	no
Glyma01g04930	Glyma01g04930	Glyma01g04930	Gm01:4617117-4621351	14-13-0	14-13-7	OK	6.66856	8.32181	0.319523	-0.506647	0.612402	0.875036	no
Glyma01g04940	Glyma01g04940	Glyma01g04940	Gm01:4623827-4626604	14-13-0	14-13-7	NOTEST	0	0	0	0	1	1	no
Glyma01g04950	Glyma01g04950	Glyma01g04950	Gm01:4628266-4630966	14-13-0	14-13-7	NOTEST	0	0	0	0	1	1	no
Glyma01g04970	Glyma01g04970	Glyma01g04970	Gm01:4642856-4646062	14-13-0	14-13-7	NOTEST	0	0	0	0	1	1	no
Glyma01g04980	Glyma01g04980	Glyma01g04980	Gm01:4649145-4655506	14-13-0	14-13-7	OK	24.4438	17.1289	-0.513039	0.805947	0.420274	0.761861	no
Glyma01g04991	Glyma01g04991	Glyma01g04991	Gm01:4658655-4660266	14-13-0	14-13-7	OK	1.93921	0.98922	-0.971109	1.34885	0.177384	0.516689	no
Glyma01g05000	Glyma01g05000	Glyma01g05000	Gm01:4661267-4665903	14-13-0	14-13-7	OK	26.1587	3.37518	-2.95426	4.72126	2.34386e-06	0.000241316	yes
Glyma01g05020	Glyma01g05020	Glyma01g05020	Gm01:4671907-4672948	14-13-0	14-13-7	NOTEST	0	0.0775222	1.79769e+308	1.79769e+308	0.0881256	1	no
Glyma01g05035	Glyma01g05035	Glyma01g05035	Gm01:4674370-4675308	14-13-0	14-13-7	NOTEST	0	0	0	0	1	1	no
Glyma01g05050	Glyma01g05050	Glyma01g05050	Gm01:4685833-4692108	14-13-0	14-13-7	NOTEST	0	0	0	0	1	1	no
Glyma01g05060	Glyma01g05060	Glyma01g05060	Gm01:4706315-4710196	14-13-0	14-13-7	NOTEST	0	0	0	0	1	1	no
Glyma01g05070	Glyma01g05070	Glyma01g05070	Gm01:4710246-4716428	14-13-0	14-13-7	NOTEST	0	0	0	0	1	1	no
Glyma01g05080	Glyma01g05080	Glyma01g05080	Gm01:4729092-4732808	14-13-0	14-13-7	OK	10.3238	1.84349	-2.48547	3.61072	0.000305343	0.0106331	yes
Glyma01g05090	Glyma01g05090	Glyma01g05090	Gm01:4733168-4736974	14-13-0	14-13-7	NOTEST	0.0736197	0.0258161	-1.51182	0.778046	0.436542	1	no
Glyma01g05100	Glyma01g05100	Glyma01g05100	Gm01:4750064-4755456	14-13-0	14-13-7	OK	1.72616	2.40695	0.47964	-0.774703	0.438515	0.776091	no
Glyma01g05110	Glyma01g05110	Glyma01g05110	Gm01:4767629-4768506	14-13-0	14-13-7	NOTEST	0	0	0	0	1	1	no
Glyma01g05120	Glyma01g05120	Glyma01g05120	Gm01:4767629-4768506	14-13-0	14-13-7	NOTEST	0	0	0	0	1	1	no
Glyma01g05135	Glyma01g05135	Glyma01g05135	Gm01:4772497-4774260	14-13-0	14-13-7	NOTEST	0	0	0	0	1	1	no
Glyma01g05150	Glyma01g05150	Glyma01g05150	Gm01:4805906-4807682	14-13-0	14-13-7	OK	132.468	72.4223	-0.871137	1.21713	0.223555	0.575325	no
Glyma01g05160	Glyma01g05160	Glyma01g05160	Gm01:4822853-4826845	14-13-0	14-13-7	OK	9.12579	8.69074	-0.0704693	0.118737	0.905484	0.979879	no
Glyma01g05170	Glyma01g05170	Glyma01g05170	Gm01:4850795-4854700	14-13-0	14-13-7	OK	4.0729	3.95794	-0.0413037	0.0674128	0.946253	0.989128	no
Glyma01g05180	Glyma01g05180	Glyma01g05180	Gm01:4855329-4863296	14-13-0	14-13-7	NOTEST	0.0456964	0	-1.79769e+308	-1.79769e+308	0.211983	1	no
Glyma01g05190	Glyma01g05190	Glyma01g05190	Gm01:4855329-4863296	14-13-0	14-13-7	NOTEST	0.0773494	0.240889	1.6389	-1.47929	0.139064	1	no
Glyma01g05220	Glyma01g05220	Glyma01g05220	Gm01:4891977-4893336	14-13-0	14-13-7	OK	73.3265	29.801	-1.29897	1.98281	0.0473891	0.255347	no
Glyma01g05230	Glyma01g05230	Glyma01g05230	Gm01:4900381-4902743	14-13-0	14-13-7	OK	1.74111	5.34969	1.61945	-2.57194	0.010113	0.105863	no
Glyma01g05240	Glyma01g05240	Glyma01g05240	Gm01:4928138-4929616	14-13-0	14-13-7	NOTEST	0.126236	0	-1.79769e+308	-1.79769e+308	0.123372	1	no
Glyma01g05310	Glyma01g05310	Glyma01g05310	Gm01:4961751-4963489	14-13-0	14-13-7	NOTEST	0.204966	0.344473	0.749009	-0.673919	0.500363	1	no
Glyma01g05321	Glyma01g05321	Glyma01g05321	Gm01:5005094-5010084	14-13-0	14-13-7	OK	0.839545	1.43086	0.769202	-0.77525	0.438192	0.775804	no
Glyma01g05330	Glyma01g05330	Glyma01g05330	Gm01:5020413-5021405	14-13-0	14-13-7	NOTEST	0	0	0	0	1	1	no
Glyma01g05340	Glyma01g05340	Glyma01g05340	Gm01:5037886-5042760	14-13-0	14-13-7	OK	3.65827	4.09815	0.163812	-0.258297	0.796178	0.9474	no
Glyma01g05350	Glyma01g05350	Glyma01g05350	Gm01:5083980-5085647	14-13-0	14-13-7	OK	3.98117	5.28543	0.408828	-0.669736	0.503026	0.81565	no
Glyma01g05360	Glyma01g05360	Glyma01g05360	Gm01:5110798-5114049	14-13-0	14-13-7	OK	2.36414	1.67399	-0.498026	0.69052	0.489867	0.809051	no
Glyma01g05370	Glyma01g05370	Glyma01g05370	Gm01:5118887-5122289	14-13-0	14-13-7	OK	0.408601	0.549161	0.426537	-0.440018	0.659924	0.895428	no
Glyma01g05390	Glyma01g05390	Glyma01g05390	Gm01:5164083-5165652	14-13-0	14-13-7	NOTEST	0	0	0	0	1	1	no
Glyma01g05410	Glyma01g05410	Glyma01g05410	Gm01:5213600-5216013	14-13-0	14-13-7	OK	9.60234	8.44733	-0.184891	0.314805	0.75291	0.929689	no
Glyma01g05430	Glyma01g05430	Glyma01g05430	Gm01:5252557-5258022	14-13-0	14-13-7	OK	5.16689	3.31753	-0.639184	1.04336	0.296782	0.656585	no
Glyma01g05435	Glyma01g05435	Glyma01g05435	Gm01:5252557-5258022	14-13-0	14-13-7	NOTEST	0	0	0	0	1	1	no
Glyma01g05440	Glyma01g05440	Glyma01g05440	Gm01:5263624-5268235	14-13-0	14-13-7	OK	2.07551	1.50852	-0.460328	0.697079	0.485753	0.807288	no
Glyma01g05450	Glyma01g05450	Glyma01g05450	Gm01:5286387-5287671	14-13-0	14-13-7	OK	0.57216	0.933684	0.706516	-0.78186	0.434297	0.772415	no
Glyma01g05470	Glyma01g05470	Glyma01g05470	Gm01:5303846-5307805	14-13-0	14-13-7	OK	2.34773	1.55716	-0.592344	0.840807	0.400456	0.745922	no
Glyma01g05490	Glyma01g05490	Glyma01g05490	Gm01:5313627-5317389	14-13-0	14-13-7	OK	7.80699	8.19874	0.0706363	-0.110171	0.912274	0.981639	no
Glyma01g05500	Glyma01g05500	Glyma01g05500	Gm01:5324074-5325556	14-13-0	14-13-7	OK	1.38673	0.0223177	-5.95735	3.37399	0.000740862	0.0201155	yes
Glyma01g05521	Glyma01g05521	Glyma01g05521	Gm01:5332060-5334718	14-13-0	14-13-7	NOTEST	0	0	0	0	1	1	no
Glyma01g05540	Glyma01g05540	Glyma01g05540	Gm01:5339676-5347885	14-13-0	14-13-7	OK	0.598837	0.265571	-1.17306	1.18768	0.234961	0.590641	no
Glyma01g05550	Glyma01g05550	Glyma01g05550	Gm01:5348570-5352305	14-13-0	14-13-7	OK	9.7761	8.26874	-0.241591	0.421928	0.673077	0.900715	no
Glyma01g05565	Glyma01g05565	Glyma01g05565	Gm01:5365957-5368432	14-13-0	14-13-7	OK	0.496649	0.673067	0.438523	-0.45842	0.646651	0.889128	no
Glyma01g05580	Glyma01g05580	Glyma01g05580	Gm01:5372439-5377697	14-13-0	14-13-7	OK	2.69925	1.91952	-0.491811	0.801609	0.422779	0.764063	no
Glyma01g05680	Glyma01g05680	Glyma01g05680	Gm01:5434961-5437325	14-13-0	14-13-7	NOTEST	0	0	0	0	1	1	no
Glyma01g05710	Glyma01g05710	Glyma01g05710	Gm01:5452126-5455897	14-13-0	14-13-7	OK	2.66689	2.00962	-0.408235	0.681341	0.495656	0.811915	no
Glyma01g05740	Glyma01g05740	Glyma01g05740	Gm01:5471207-5473302	14-13-0	14-13-7	OK	81.5161	21.5994	-1.91609	3.02449	0.00249052	0.0455159	yes
Glyma01g05750	Glyma01g05750	Glyma01g05750	Gm01:5490127-5498444	14-13-0	14-13-7	OK	8.048	7.10359	-0.180083	0.305791	0.759764	0.933358	no
Glyma01g05760	Glyma01g05760	Glyma01g05760	Gm01:5490127-5498444	14-13-0	14-13-7	OK	1.1414	0.677442	-0.752637	0.181186	0.856221	0.967281	no
Glyma01g05765	Glyma01g05765	Glyma01g05765	Gm01:5500755-5503968	14-13-0	14-13-7	OK	1.07226	0.797364	-0.42734	0.483672	0.628619	0.882259	no
Glyma01g05770	Glyma01g05770	Glyma01g05770	Gm01:5507145-5510888	14-13-0	14-13-7	OK	1.09927	0.446305	-1.30045	1.39601	0.162713	0.495614	no
Glyma01g05775	Glyma01g05775	Glyma01g05775	Gm01:5515370-5518889	14-13-0	14-13-7	NOTEST	0	0	0	0	1	1	no
Glyma01g05780	Glyma01g05780	Glyma01g05780	Gm01:5532190-5532902	14-13-0	14-13-7	OK	0	0.885151	1.79769e+308	1.79769e+308	0.0251324	0.178835	no
Glyma01g05800	Glyma01g05800	Glyma01g05800	Gm01:5536188-5540803	14-13-0	14-13-7	OK	13.6025	14.7775	0.11953	-0.206114	0.836702	0.96164	no
Glyma01g05805	Glyma01g05805	Glyma01g05805	Gm01:5546122-5546986	14-13-0	14-13-7	NOTEST	0	0	0	0	1	1	no
Glyma01g05810	Glyma01g05810	Glyma01g05810	Gm01:5571757-5573352	14-13-0	14-13-7	OK	10.2843	1.83826	-2.48404	3.88508	0.000102298	0.00472336	yes
Glyma01g05820	Glyma01g05820	Glyma01g05820	Gm01:5576197-5588666	14-13-0	14-13-7	OK	5.35252	2.77853	-0.945898	1.05451	0.291652	0.650925	no
Glyma01g05830	Glyma01g05830	Glyma01g05830	Gm01:5591933-5594156	14-13-0	14-13-7	OK	1.30279	0.9623	-0.437044	0.619574	0.535538	0.835248	no
Glyma01g05840	Glyma01g05840	Glyma01g05840	Gm01:5603554-5605881	14-13-0	14-13-7	NOTEST	0	0	0	0	1	1	no
Glyma01g05850	Glyma01g05850	Glyma01g05850	Gm01:5614232-5617834	14-13-0	14-13-7	NOTEST	0	0.0290778	1.79769e+308	1.79769e+308	0.196186	1	no
Glyma01g05860	Glyma01g05860	Glyma01g05860	Gm01:5646198-5652308	14-13-0	14-13-7	OK	1.65912	1.99335	0.264783	-0.395961	0.692134	0.908401	no
Glyma01g05871	Glyma01g05871	Glyma01g05871	Gm01:5655285-5657085	14-13-0	14-13-7	OK	0.563008	0.18935	-1.5721	1.44205	0.149289	0.473611	no
Glyma01g05880	Glyma01g05880	Glyma01g05880	Gm01:5667408-5668624	14-13-0	14-13-7	OK	3.57095	4.63944	0.377644	-0.603136	0.546418	0.840918	no
Glyma01g05890	Glyma01g05890	Glyma01g05890	Gm01:5668699-5671152	14-13-0	14-13-7	OK	0.437991	0.424449	-0.0453109	0.0525223	0.958113	0.991582	no
Glyma01g05920	Glyma01g05920	Glyma01g05920	Gm01:5704147-5706648	14-13-0	14-13-7	OK	4.38538	3.05951	-0.5194	0.877902	0.379997	0.729478	no
Glyma01g05933	Glyma01g05933	Glyma01g05933	Gm01:5723315-5724248	14-13-0	14-13-7	NOTEST	0	0	0	0	1	1	no
Glyma01g05946	Glyma01g05946	Glyma01g05946	Gm01:5726524-5728292	14-13-0	14-13-7	NOTEST	0	0	0	0	1	1	no
Glyma01g05960	Glyma01g05960	Glyma01g05960	Gm01:5750258-5754433	14-13-0	14-13-7	OK	1.11637	0.456778	-1.28926	1.6772	0.0935025	0.371808	no
Glyma01g05970	Glyma01g05970	Glyma01g05970	Gm01:5789076-5789854	14-13-0	14-13-7	NOTEST	0	0.12	1.79769e+308	1.79769e+308	0.113214	1	no
Glyma01g05980	Glyma01g05980	Glyma01g05980	Gm01:5800710-5803197	14-13-0	14-13-7	NOTEST	0.0302756	0.0329224	0.120916	-0.0701167	0.944101	1	no
Glyma01g05991	Glyma01g05991	Glyma01g05991	Gm01:5815181-5815856	14-13-0	14-13-7	OK	0.946026	0.140869	-2.74752	2.33947	0.019311	0.153783	no
Glyma01g06001	Glyma01g06001	Glyma01g06001	Gm01:5820213-5821125	14-13-0	14-13-7	NOTEST	0	0	0	0	1	1	no
Glyma01g06010	Glyma01g06010	Glyma01g06010	Gm01:5849676-5850474	14-13-0	14-13-7	OK	3.74875	3.9554	0.0774175	-0.112476	0.910446	0.981026	no
Glyma01g06030	Glyma01g06030	Glyma01g06030	Gm01:5873668-5876124	14-13-0	14-13-7	OK	74.991	189.666	1.33867	-1.59691	0.110285	0.406016	no
Glyma01g06060	Glyma01g06060	Glyma01g06060	Gm01:5950520-5957354	14-13-0	14-13-7	OK	2.61389	2.88508	0.142413	-0.209462	0.834088	0.961105	no
Glyma01g06080	Glyma01g06080	Glyma01g06080	Gm01:5980779-5983675	14-13-0	14-13-7	OK	7.74349	6.29046	-0.299818	0.505106	0.613485	0.875601	no
Glyma01g06091	Glyma01g06091	Glyma01g06091	Gm01:6001894-6002536	14-13-0	14-13-7	NOTEST	0	0	0	0	1	1	no
Glyma01g06101	Glyma01g06101	Glyma01g06101	Gm01:6012889-6016913	14-13-0	14-13-7	NOTEST	0	0	0	0	1	1	no
Glyma01g06110	Glyma01g06110	Glyma01g06110	Gm01:6012889-6016913	14-13-0	14-13-7	OK	230.239	109.866	-1.06739	1.36476	0.172329	0.510094	no
Glyma01g06121	Glyma01g06121	Glyma01g06121	Gm01:6021842-6025894	14-13-0	14-13-7	NOTEST	0	0	0	0	1	1	no
Glyma01g06131	Glyma01g06131	Glyma01g06131	Gm01:6027072-6027783	14-13-0	14-13-7	NOTEST	0	0	0	0	1	1	no
Glyma01g06140	Glyma01g06140	Glyma01g06140	Gm01:6036836-6042396	14-13-0	14-13-7	NOTEST	0	0	0	0	1	1	no
Glyma01g06150	Glyma01g06150	Glyma01g06150	Gm01:6047154-6049059	14-13-0	14-13-7	OK	0.980206	1.54475	0.656219	-0.845161	0.398021	0.744285	no
Glyma01g06170	Glyma01g06170	Glyma01g06170	Gm01:6071138-6081550	14-13-0	14-13-7	OK	11.6777	8.50286	-0.457734	0.697563	0.48545	0.807135	no
Glyma01g06181	Glyma01g06181	Glyma01g06181	Gm01:6100672-6102037	14-13-0	14-13-7	NOTEST	0	0	0	0	1	1	no
Glyma01g06192	Glyma01g06192	Glyma01g06192	Gm01:6238679-6240315	14-13-0	14-13-7	NOTEST	0	0	0	0	1	1	no
Glyma01g06203	Glyma01g06203	Glyma01g06203	Gm01:6266528-6267750	14-13-0	14-13-7	NOTEST	0	0	0	0	1	1	no
Glyma01g06214	Glyma01g06214	Glyma01g06214	Gm01:6283658-6285214	14-13-0	14-13-7	NOTEST	0	0	0	0	1	1	no
Glyma01g06226	Glyma01g06226	Glyma01g06226	Gm01:6285502-6288118	14-13-0	14-13-7	NOTEST	0	0	0	0	1	1	no
Glyma01g06238	Glyma01g06238	Glyma01g06238	Gm01:6291503-6292208	14-13-0	14-13-7	NOTEST	0	0	0	0	1	1	no
Glyma01g06250	Glyma01g06250	Glyma01g06250	Gm01:6303783-6304910	14-13-0	14-13-7	NOTEST	0	0	0	0	1	1	no
Glyma01g06255	Glyma01g06255	Glyma01g06255	Gm01:6305430-6306253	14-13-0	14-13-7	NOTEST	0	0	0	0	1	1	no
Glyma01g06260	Glyma01g06260	Glyma01g06260	Gm01:6314251-6321822	14-13-0	14-13-7	OK	10.0085	4.46367	-1.16493	1.94672	0.0515688	0.268494	no
Glyma01g06265	Glyma01g06265	Glyma01g06265	Gm01:6323487-6330290	14-13-0	14-13-7	OK	0.574711	0.234856	-1.29106	1.75397	0.0794363	0.339429	no
Glyma01g06270	Glyma01g06270	Glyma01g06270	Gm01:6353278-6357024	14-13-0	14-13-7	OK	5.9482	4.20765	-0.49944	0.82827	0.407518	0.751978	no
Glyma01g06281	Glyma01g06281	Glyma01g06281	Gm01:6358175-6364839	14-13-0	14-13-7	OK	1.24059	0.725997	-0.772995	1.06524	0.286769	0.646128	no
Glyma01g06290	Glyma01g06290	Glyma01g06290	Gm01:6415709-6426123	14-13-0	14-13-7	OK	5.01373	5.30936	0.0826533	-0.143966	0.885527	0.975347	no
Glyma01g06300	Glyma01g06300	Glyma01g06300	Gm01:6427320-6430789	14-13-0	14-13-7	OK	3.72862	10.9951	1.56015	-2.63061	0.00852326	0.0960772	no
Glyma01g06320	Glyma01g06320	Glyma01g06320	Gm01:6438347-6443201	14-13-0	14-13-7	OK	5.39122	4.10473	-0.393326	0.636753	0.524286	0.827859	no
Glyma01g06330	Glyma01g06330	Glyma01g06330	Gm01:6463489-6464681	14-13-0	14-13-7	NOTEST	0	0	0	0	1	1	no
Glyma01g06350	Glyma01g06350	Glyma01g06350	Gm01:6519357-6525574	14-13-0	14-13-7	NOTEST	0	0.0514947	1.79769e+308	1.79769e+308	0.196186	1	no
Glyma01g06370	Glyma01g06370	Glyma01g06370	Gm01:6606759-6612290	14-13-0	14-13-7	OK	1.58493	0.226824	-2.80477	3.80029	0.000144524	0.00614698	yes
Glyma01g06380	Glyma01g06380	Glyma01g06380	Gm01:6619142-6624870	14-13-0	14-13-7	OK	4.19147	2.85109	-0.555943	0.823871	0.410013	0.754105	no
Glyma01g06403	Glyma01g06403	Glyma01g06403	Gm01:6653831-6654651	14-13-0	14-13-7	NOTEST	0	0	0	0	1	1	no
Glyma01g06426	Glyma01g06426	Glyma01g06426	Gm01:6655568-6658132	14-13-0	14-13-7	NOTEST	0	0	0	0	1	1	no
Glyma01g06450	Glyma01g06450	Glyma01g06450	Gm01:6697229-6704493	14-13-0	14-13-7	OK	3.07727	2.96105	-0.0555399	0.0961885	0.923371	0.984485	no
Glyma01g06465	Glyma01g06465	Glyma01g06465	Gm01:6734268-6734951	14-13-0	14-13-7	NOTEST	0	0	0	0	1	1	no
Glyma01g06480	Glyma01g06480	Glyma01g06480	Gm01:6737090-6743586	14-13-0	14-13-7	OK	0.237225	0.464124	0.968258	-0.878324	0.379768	0.729413	no
Glyma01g06530	Glyma01g06530	Glyma01g06530	Gm01:6773745-6780125	14-13-0	14-13-7	NOTEST	0.0822786	0.014612	-2.49337	0.877408	0.380265	1	no
Glyma01g06540	Glyma01g06540	Glyma01g06540	Gm01:6785070-6791180	14-13-0	14-13-7	OK	3.26024	1.21576	-1.42312	1.64065	0.100869	0.386636	no
Glyma01g06550	Glyma01g06550	Glyma01g06550	Gm01:6797682-6802949	14-13-0	14-13-7	OK	0.902118	1.48383	0.717938	-1.02857	0.303683	0.663042	no
Glyma01g06575	Glyma01g06575	Glyma01g06575	Gm01:6821946-6822491	14-13-0	14-13-7	NOTEST	0	0	0	0	1	1	no
Glyma01g06600	Glyma01g06600	Glyma01g06600	Gm01:6945949-6947844	14-13-0	14-13-7	OK	12.3739	10.1651	-0.283682	0.439861	0.660037	0.895428	no
Glyma01g06610	Glyma01g06610	Glyma01g06610	Gm01:6949449-6956726	14-13-0	14-13-7	NOTEST	0	0.158045	1.79769e+308	1.79769e+308	0.0351036	1	no
Glyma01g06620	Glyma01g06620	Glyma01g06620	Gm01:6963802-6967415	14-13-0	14-13-7	OK	7.343	7.09024	-0.0505359	0.0860273	0.931445	0.986263	no
Glyma01g06630	Glyma01g06630	Glyma01g06630	Gm01:6987088-6990503	14-13-0	14-13-7	OK	8.18075	4.4431	-0.880667	1.38631	0.165653	0.500293	no
Glyma01g06640	Glyma01g06640	Glyma01g06640	Gm01:6992005-6995011	14-13-0	14-13-7	OK	0.762982	0.817128	0.0989128	-0.115766	0.907838	0.98054	no
Glyma01g06660	Glyma01g06660	Glyma01g06660	Gm01:7007301-7012903	14-13-0	14-13-7	NOTEST	0.0284316	0	-1.79769e+308	-1.79769e+308	0.171391	1	no
Glyma01g06671	Glyma01g06671	Glyma01g06671	Gm01:7051709-7055503	14-13-0	14-13-7	NOTEST	0	0	0	0	1	1	no
Glyma01g06681	Glyma01g06681	Glyma01g06681	Gm01:7074917-7078717	14-13-0	14-13-7	OK	2.85607	6.25546	1.13108	-1.93976	0.0524086	0.270084	no
Glyma01g06690	Glyma01g06690	Glyma01g06690	Gm01:7089055-7091542	14-13-0	14-13-7	OK	0.588237	0.406544	-0.532987	0.652544	0.51405	0.822123	no
Glyma01g06700	Glyma01g06700	Glyma01g06700	Gm01:7093539-7097353	14-13-0	14-13-7	OK	1.62836	1.28098	-0.346164	0.408268	0.683077	0.90468	no
Glyma01g06720	Glyma01g06720	Glyma01g06720	Gm01:7128540-7130153	14-13-0	14-13-7	NOTEST	0	0	0	0	1	1	no
Glyma01g06730	Glyma01g06730	Glyma01g06730	Gm01:7131214-7140582	14-13-0	14-13-7	OK	1.50573	2.01709	0.421809	-0.662598	0.507588	0.817901	no
Glyma01g06740	Glyma01g06740	Glyma01g06740	Gm01:7146652-7148230	14-13-0	14-13-7	OK	68.4873	28.5264	-1.26354	1.719	0.0856152	0.353728	no
Glyma01g06750	Glyma01g06750	Glyma01g06750	Gm01:7149379-7152784	14-13-0	14-13-7	OK	5.32128	3.99652	-0.413031	0.645684	0.518484	0.824614	no
Glyma01g06762	Glyma01g06762	Glyma01g06762	Gm01:7159103-7161168	14-13-0	14-13-7	NOTEST	0	0	0	0	1	1	no
Glyma01g06774	Glyma01g06774	Glyma01g06774	Gm01:7193728-7195967	14-13-0	14-13-7	OK	0.481344	2.97739	2.62891	-3.28466	0.00102104	0.0249444	yes
Glyma01g06787	Glyma01g06787	Glyma01g06787	Gm01:7202426-7203771	14-13-0	14-13-7	OK	1.61126	1.34997	-0.255264	0.277513	0.781386	0.941589	no
Glyma01g06800	Glyma01g06800	Glyma01g06800	Gm01:7209667-7216248	14-13-0	14-13-7	OK	5.71967	3.46816	-0.721759	1.13665	0.255684	0.614145	no
Glyma01g06810	Glyma01g06810	Glyma01g06810	Gm01:7209667-7216248	14-13-0	14-13-7	OK	0.370537	0.816301	1.13948	-0.444057	0.657001	0.893596	no
Glyma01g06820	Glyma01g06820	Glyma01g06820	Gm01:7217423-7219310	14-13-0	14-13-7	OK	1.30536	0.572416	-1.18931	1.32049	0.186672	0.529935	no
Glyma01g06830	Glyma01g06830	Glyma01g06830	Gm01:7247591-7249157	14-13-0	14-13-7	NOTEST	0	0	0	0	1	1	no
Glyma01g06840	Glyma01g06840	Glyma01g06840	Gm01:7250230-7254936	14-13-0	14-13-7	OK	14.7129	12.5142	-0.233517	0.400815	0.688557	0.906988	no
Glyma01g06850	Glyma01g06850	Glyma01g06850	Gm01:7272747-7275098	14-13-0	14-13-7	OK	2.14354	1.12157	-0.93447	1.30207	0.192892	0.538552	no
Glyma01g06860	Glyma01g06860	Glyma01g06860	Gm01:7277818-7281645	14-13-0	14-13-7	NOTEST	0	0	0	0	1	1	no
Glyma01g06870	Glyma01g06870	Glyma01g06870	Gm01:7343212-7351310	14-13-0	14-13-7	OK	1.8901	1.54828	-0.28779	0.360819	0.718235	0.917506	no
Glyma01g06880	Glyma01g06880	Glyma01g06880	Gm01:7358248-7360930	14-13-0	14-13-7	NOTEST	0.302912	0.1139	-1.41114	1.46844	0.141985	1	no
Glyma01g06902	Glyma01g06902	Glyma01g06902	Gm01:7382653-7384804	14-13-0	14-13-7	NOTEST	0	0	0	0	1	1	no
Glyma01g06924	Glyma01g06924	Glyma01g06924	Gm01:7422342-7427765	14-13-0	14-13-7	NOTEST	0	0	0	0	1	1	no
Glyma01g06947	Glyma01g06947	Glyma01g06947	Gm01:7435646-7436810	14-13-0	14-13-7	NOTEST	0	0	0	0	1	1	no
Glyma01g06970	Glyma01g06970	Glyma01g06970	Gm01:7479447-7482232	14-13-0	14-13-7	OK	8.68641	7.86163	-0.143932	0.247488	0.804531	0.950476	no
Glyma01g06980	Glyma01g06980	Glyma01g06980	Gm01:7497548-7505696	14-13-0	14-13-7	NOTEST	0	0	0	0	1	1	no
Glyma01g06995	Glyma01g06995	Glyma01g06995	Gm01:7509309-7511663	14-13-0	14-13-7	NOTEST	0	0	0	0	1	1	no
Glyma01g07010	Glyma01g07010	Glyma01g07010	Gm01:7546180-7550537	14-13-0	14-13-7	OK	14.0746	4.57687	-1.62066	2.73489	0.00624011	0.0800588	no
Glyma01g07020	Glyma01g07020	Glyma01g07020	Gm01:7562682-7571075	14-13-0	14-13-7	OK	1.51907	1.35644	-0.163359	0.166707	0.867601	0.969939	no
Glyma01g07040	Glyma01g07040	Glyma01g07040	Gm01:7573115-7574981	14-13-0	14-13-7	OK	1.27669	0.558101	-1.19382	1.56754	0.116988	0.418297	no
Glyma01g07046	Glyma01g07046	Glyma01g07046	Gm01:7576240-7581159	14-13-0	14-13-7	NOTEST	0.366269	0.125781	-1.54199	1.34539	0.178498	1	no
Glyma01g07053	Glyma01g07053	Glyma01g07053	Gm01:7587960-7591978	14-13-0	14-13-7	NOTEST	0	0	0	0	1	1	no
Glyma01g07060	Glyma01g07060	Glyma01g07060	Gm01:7606030-7608993	14-13-0	14-13-7	NOTEST	0	0	0	0	1	1	no
Glyma01g07070	Glyma01g07070	Glyma01g07070	Gm01:7614281-7618124	14-13-0	14-13-7	OK	4.66288	6.2909	0.432044	-0.738115	0.460444	0.790925	no
Glyma01g07080	Glyma01g07080	Glyma01g07080	Gm01:7621975-7627809	14-13-0	14-13-7	OK	0.000281932	0.817464	11.5016	-0.0280903	0.97759	0.996374	no
Glyma01g07091	Glyma01g07091	Glyma01g07091	Gm01:7621975-7627809	14-13-0	14-13-7	OK	4.81836	2.8646	-0.750207	1.26062	0.207444	0.554383	no
Glyma01g07100	Glyma01g07100	Glyma01g07100	Gm01:7645596-7648115	14-13-0	14-13-7	OK	28.9092	23.5878	-0.293493	0.481007	0.630511	0.883162	no
Glyma01g07110	Glyma01g07110	Glyma01g07110	Gm01:7657795-7664672	14-13-0	14-13-7	NOTEST	0.197593	0.127417	-0.632971	0.570748	0.568171	1	no
Glyma01g07120	Glyma01g07120	Glyma01g07120	Gm01:7694027-7700472	14-13-0	14-13-7	OK	28.4595	22.227	-0.356597	0.424695	0.671059	0.899942	no
Glyma01g07130	Glyma01g07130	Glyma01g07130	Gm01:7726769-7727260	14-13-0	14-13-7	OK	326.137	89.4849	-1.86576	3.00575	0.00264924	0.0471937	yes
Glyma01g07140	Glyma01g07140	Glyma01g07140	Gm01:7745867-7748795	14-13-0	14-13-7	OK	1.14078	0.887257	-0.362598	0.487648	0.625799	0.88068	no
Glyma01g07150	Glyma01g07150	Glyma01g07150	Gm01:7755456-7755710	14-13-0	14-13-7	NOTEST	0	0	0	0	1	1	no
Glyma01g07155	Glyma01g07155	Glyma01g07155	Gm01:7761366-7761600	14-13-0	14-13-7	OK	3.98659	2.47637	-0.686926	0.327613	0.743204	0.926093	no
Glyma01g07160	Glyma01g07160	Glyma01g07160	Gm01:7762334-7764158	14-13-0	14-13-7	OK	1.0762	0.963486	-0.159606	0.202421	0.839588	0.962596	no
Glyma01g07175	Glyma01g07175	Glyma01g07175	Gm01:7777226-7781079	14-13-0	14-13-7	OK	3.00777	1.63689	-0.877738	1.28625	0.198356	0.543297	no
Glyma01g07190	Glyma01g07190	Glyma01g07190	Gm01:7781287-7786746	14-13-0	14-13-7	OK	2.07109	1.99141	-0.056599	0.0768504	0.938743	0.987799	no
Glyma01g07212	Glyma01g07212	Glyma01g07212	Gm01:7794008-7794422	14-13-0	14-13-7	NOTEST	0	0	0	0	1	1	no
Glyma01g07234	Glyma01g07234	Glyma01g07234	Gm01:7804303-7805165	14-13-0	14-13-7	OK	0.373757	0.256041	-0.545725	0.496464	0.619567	0.877626	no
Glyma01g07256	Glyma01g07256	Glyma01g07256	Gm01:7805183-7807029	14-13-0	14-13-7	NOTEST	0	0	0	0	1	1	no
Glyma01g07278	Glyma01g07278	Glyma01g07278	Gm01:7894471-7899056	14-13-0	14-13-7	NOTEST	0	0	0	0	1	1	no
Glyma01g07300	Glyma01g07300	Glyma01g07300	Gm01:7959018-7960497	14-13-0	14-13-7	OK	0.92561	0.71347	-0.375552	0.435349	0.663309	0.897197	no
Glyma01g07310	Glyma01g07310	Glyma01g07310	Gm01:7961184-7963298	14-13-0	14-13-7	OK	1.47367	1.78626	0.277525	-0.319465	0.749374	0.928346	no
Glyma01g07320	Glyma01g07320	Glyma01g07320	Gm01:7976530-7977692	14-13-0	14-13-7	NOTEST	0	0	0	0	1	1	no
Glyma01g07343	Glyma01g07343	Glyma01g07343	Gm01:8062113-8062653	14-13-0	14-13-7	NOTEST	0	0	0	0	1	1	no
Glyma01g07366	Glyma01g07366	Glyma01g07366	Gm01:8067733-8073984	14-13-0	14-13-7	NOTEST	0	0	0	0	1	1	no
Glyma01g07390	Glyma01g07390	Glyma01g07390	Gm01:8081945-8087022	14-13-0	14-13-7	OK	0.939409	0.835059	-0.169875	0.214525	0.830137	0.960014	no
Glyma01g07416	Glyma01g07416	Glyma01g07416	Gm01:8182612-8184549	14-13-0	14-13-7	NOTEST	0	0	0	0	1	1	no
Glyma01g07443	Glyma01g07443	Glyma01g07443	Gm01:8199812-8203907	14-13-0	14-13-7	NOTEST	0	0	0	0	1	1	no
Glyma01g07470	Glyma01g07470	Glyma01g07470	Gm01:8280629-8281870	14-13-0	14-13-7	NOTEST	0	0	0	0	1	1	no
Glyma01g07500	Glyma01g07500	Glyma01g07500	Gm01:8288472-8290635	14-13-0	14-13-7	NOTEST	0	0	0	0	1	1	no
Glyma01g07530	Glyma01g07530	Glyma01g07530	Gm01:8321044-8331324	14-13-0	14-13-7	OK	4.55345	3.50345	-0.378183	0.658614	0.510144	0.819432	no
Glyma01g07542	Glyma01g07542	Glyma01g07542	Gm01:8338977-8341376	14-13-0	14-13-7	OK	0.595696	0.669278	0.168028	-0.182446	0.855232	0.967086	no
Glyma01g07554	Glyma01g07554	Glyma01g07554	Gm01:8344184-8347552	14-13-0	14-13-7	OK	36.7482	19.6538	-0.902862	1.5394	0.123708	0.42935	no
Glyma01g07567	Glyma01g07567	Glyma01g07567	Gm01:8348953-8350397	14-13-0	14-13-7	OK	0.305153	2.23658	2.87369	-3.28736	0.00101131	0.0248165	yes
Glyma01g07580	Glyma01g07580	Glyma01g07580	Gm01:8387061-8389448	14-13-0	14-13-7	OK	15.2323	11.3767	-0.421048	0.694318	0.487483	0.808056	no
Glyma01g07601	Glyma01g07601	Glyma01g07601	Gm01:8400738-8401869	14-13-0	14-13-7	NOTEST	0	0.0506898	1.79769e+308	1.79769e+308	0.196186	1	no
Glyma01g07621	Glyma01g07621	Glyma01g07621	Gm01:8410014-8411417	14-13-0	14-13-7	NOTEST	0	0	0	0	1	1	no
Glyma01g07641	Glyma01g07641	Glyma01g07641	Gm01:8426105-8455213	14-13-0	14-13-7	OK	4.01672	3.96366	-0.0191875	0.0332062	0.97351	0.99546	no
Glyma01g07661	Glyma01g07661	Glyma01g07661	Gm01:8426105-8455213	14-13-0	14-13-7	NOTEST	0.122561	0.152335	0.31375	-0.0757642	0.939607	1	no
Glyma01g07680	Glyma01g07680	Glyma01g07680	Gm01:8471437-8478753	14-13-0	14-13-7	OK	2.11482	2.7584	0.383302	-0.668754	0.503652	0.815925	no
Glyma01g07690	Glyma01g07690	Glyma01g07690	Gm01:8483094-8485802	14-13-0	14-13-7	OK	1.95147	0.774879	-1.33252	2.03118	0.0422368	0.239438	no
Glyma01g07716	Glyma01g07716	Glyma01g07716	Gm01:8488370-8491061	14-13-0	14-13-7	NOTEST	0	0	0	0	1	1	no
Glyma01g07743	Glyma01g07743	Glyma01g07743	Gm01:8512443-8513748	14-13-0	14-13-7	NOTEST	0	0	0	0	1	1	no
Glyma01g07770	Glyma01g07770	Glyma01g07770	Gm01:8571080-8576705	14-13-0	14-13-7	OK	12.7976	7.85657	-0.703896	1.22177	0.221795	0.573804	no
Glyma01g07780	Glyma01g07780	Glyma01g07780	Gm01:8580150-8584320	14-13-0	14-13-7	OK	5.10572	1.4986	-1.7685	2.86277	0.0041995	0.0626556	no
Glyma01g07791	Glyma01g07791	Glyma01g07791	Gm01:8585310-8588909	14-13-0	14-13-7	OK	0.891894	0.653766	-0.448097	0.509749	0.610227	0.874066	no
Glyma01g07800	Glyma01g07800	Glyma01g07800	Gm01:8594093-8595436	14-13-0	14-13-7	OK	7.30602	4.36517	-0.743047	1.2301	0.218659	0.569574	no
Glyma01g07860	Glyma01g07860	Glyma01g07860	Gm01:8667868-8673493	14-13-0	14-13-7	NOTEST	0	0.176408	1.79769e+308	1.79769e+308	0.0183236	1	no
Glyma01g07876	Glyma01g07876	Glyma01g07876	Gm01:8788410-8789743	14-13-0	14-13-7	NOTEST	0	0.0195994	1.79769e+308	1.79769e+308	0.272654	1	no
Glyma01g07893	Glyma01g07893	Glyma01g07893	Gm01:8792135-8793707	14-13-0	14-13-7	NOTEST	0	0	0	0	1	1	no
Glyma01g07910	Glyma01g07910	Glyma01g07910	Gm01:8838722-8843110	14-13-0	14-13-7	NOTEST	0	0	0	0	1	1	no
Glyma01g07930	Glyma01g07930	Glyma01g07930	Gm01:8874759-8878203	14-13-0	14-13-7	OK	10.6393	11.5696	0.12094	-0.209355	0.834171	0.961105	no
Glyma01g07940	Glyma01g07940	Glyma01g07940	Gm01:8910470-8913789	14-13-0	14-13-7	OK	1.36808	1.60214	0.22784	-0.33262	0.739421	0.925011	no
Glyma01g07970	Glyma01g07970	Glyma01g07970	Gm01:8936938-8942561	14-13-0	14-13-7	NOTEST	0	0	0	0	1	1	no
Glyma01g07985	Glyma01g07985	Glyma01g07985	Gm01:8949064-8950284	14-13-0	14-13-7	NOTEST	0.115158	0	-1.79769e+308	-1.79769e+308	0.123372	1	no
Glyma01g08001	Glyma01g08001	Glyma01g08001	Gm01:8978273-8979785	14-13-0	14-13-7	NOTEST	0	0	0	0	1	1	no
Glyma01g08015	Glyma01g08015	Glyma01g08015	Gm01:8998365-8999926	14-13-0	14-13-7	NOTEST	0	0	0	0	1	1	no
Glyma01g08030	Glyma01g08030	Glyma01g08030	Gm01:9017676-9019966	14-13-0	14-13-7	NOTEST	0	0	0	0	1	1	no
Glyma01g08043	Glyma01g08043	Glyma01g08043	Gm01:9021976-9042121	14-13-0	14-13-7	OK	1.2484	1.30157	0.0601766	-0.101121	0.919455	0.983121	no
Glyma01g08056	Glyma01g08056	Glyma01g08056	Gm01:9051046-9057050	14-13-0	14-13-7	OK	1.46424	1.07435	-0.44669	0.558978	0.576176	0.858039	no
Glyma01g08070	Glyma01g08070	Glyma01g08070	Gm01:9109611-9110650	14-13-0	14-13-7	NOTEST	0	0	0	0	1	1	no
Glyma01g08080	Glyma01g08080	Glyma01g08080	Gm01:9174134-9176210	14-13-0	14-13-7	OK	0.794712	1.23934	0.641072	-0.874539	0.381825	0.730973	no
Glyma01g08096	Glyma01g08096	Glyma01g08096	Gm01:9198539-9199466	14-13-0	14-13-7	NOTEST	0	0	0	0	1	1	no
Glyma01g08113	Glyma01g08113	Glyma01g08113	Gm01:9252869-9254570	14-13-0	14-13-7	NOTEST	0	0	0	0	1	1	no
Glyma01g08130	Glyma01g08130	Glyma01g08130	Gm01:9331637-9344994	14-13-0	14-13-7	NOTEST	0	0	0	0	1	1	no
Glyma01g08150	Glyma01g08150	Glyma01g08150	Gm01:9446809-9451393	14-13-0	14-13-7	NOTEST	0.208184	0.272747	0.389707	-0.377138	0.706071	1	no
Glyma01g08191	Glyma01g08191	Glyma01g08191	Gm01:9525972-9529696	14-13-0	14-13-7	NOTEST	0	0	0	0	1	1	no
Glyma01g08230	Glyma01g08230	Glyma01g08230	Gm01:9575252-9581967	14-13-0	14-13-7	OK	3.70276	3.73021	0.0106579	-0.018227	0.985458	0.997178	no
Glyma01g08250	Glyma01g08250	Glyma01g08250	Gm01:9636460-9637409	14-13-0	14-13-7	NOTEST	0	0	0	0	1	1	no
Glyma01g08260	Glyma01g08260	Glyma01g08260	Gm01:9642089-9646537	14-13-0	14-13-7	OK	0.638305	1.33833	1.06811	-1.17424	0.240297	0.5974	no
Glyma01g08400	Glyma01g08400	Glyma01g08400	Gm01:9844796-9845510	14-13-0	14-13-7	NOTEST	0	0	0	0	1	1	no
Glyma01g08540	Glyma01g08540	Glyma01g08540	Gm01:9914169-9919593	14-13-0	14-13-7	OK	3.6412	3.5585	-0.0331472	0.0516853	0.958779	0.991839	no
Glyma01g08560	Glyma01g08560	Glyma01g08560	Gm01:9947412-9949603	14-13-0	14-13-7	NOTEST	0	0	0	0	1	1	no
Glyma01g08580	Glyma01g08580	Glyma01g08580	Gm01:9980287-9986041	14-13-0	14-13-7	OK	8.64852	8.24057	-0.0697092	0.121641	0.903184	0.979428	no
Glyma01g08586	Glyma01g08586	Glyma01g08586	Gm01:10000985-10002625	14-13-0	14-13-7	NOTEST	0	0	0	0	1	1	no
Glyma01g08593	Glyma01g08593	Glyma01g08593	Gm01:10003770-10020103	14-13-0	14-13-7	NOTEST	0	0	0	0	1	1	no
Glyma01g08600	Glyma01g08600	Glyma01g08600	Gm01:10022026-10027778	14-13-0	14-13-7	OK	9.17942	6.46139	-0.506558	0.854373	0.392899	0.74092	no
Glyma01g08610	Glyma01g08610	Glyma01g08610	Gm01:10032095-10036624	14-13-0	14-13-7	NOTEST	0	0	0	0	1	1	no
Glyma01g08621	Glyma01g08621	Glyma01g08621	Gm01:10051789-10059800	14-13-0	14-13-7	NOTEST	0	0	0	0	1	1	no
Glyma01g08631	Glyma01g08631	Glyma01g08631	Gm01:10051789-10059800	14-13-0	14-13-7	NOTEST	0	0.0196688	1.79769e+308	1.79769e+308	0.232212	1	no
Glyma01g08640	Glyma01g08640	Glyma01g08640	Gm01:10086673-10091927	14-13-0	14-13-7	NOTEST	0.0150349	0.214984	3.83784	-2.32005	0.0203384	1	no
Glyma01g08650	Glyma01g08650	Glyma01g08650	Gm01:10086673-10091927	14-13-0	14-13-7	NOTEST	0.123234	0.119958	-0.0388633	0.0134496	0.989269	1	no
Glyma01g08690	Glyma01g08690	Glyma01g08690	Gm01:10142572-10144504	14-13-0	14-13-7	NOTEST	0	0	0	0	1	1	no
Glyma01g08730	Glyma01g08730	Glyma01g08730	Gm01:10288660-10290556	14-13-0	14-13-7	NOTEST	0	0	0	0	1	1	no
Glyma01g08745	Glyma01g08745	Glyma01g08745	Gm01:10293654-10294541	14-13-0	14-13-7	NOTEST	0	0	0	0	1	1	no
Glyma01g08760	Glyma01g08760	Glyma01g08760	Gm01:10355582-10357514	14-13-0	14-13-7	NOTEST	0	0	0	0	1	1	no
Glyma01g08870	Glyma01g08870	Glyma01g08870	Gm01:10370136-10371995	14-13-0	14-13-7	NOTEST	0	0	0	0	1	1	no
Glyma01g08980	Glyma01g08980	Glyma01g08980	Gm01:10504878-10510246	14-13-0	14-13-7	NOTEST	0	0	0	0	1	1	no
Glyma01g09000	Glyma01g09000	Glyma01g09000	Gm01:10570987-10572412	14-13-0	14-13-7	NOTEST	0	0	0	0	1	1	no
Glyma01g09010	Glyma01g09010	Glyma01g09010	Gm01:10577946-10583595	14-13-0	14-13-7	OK	9.11938	7.06467	-0.368314	0.557499	0.577186	0.858408	no
Glyma01g09040	Glyma01g09040	Glyma01g09040	Gm01:10601638-10602621	14-13-0	14-13-7	NOTEST	0	0	0	0	1	1	no
Glyma01g09066	Glyma01g09066	Glyma01g09066	Gm01:10604268-10604624	14-13-0	14-13-7	NOTEST	0	0	0	0	1	1	no
Glyma01g09093	Glyma01g09093	Glyma01g09093	Gm01:10716118-10717174	14-13-0	14-13-7	NOTEST	0	0	0	0	1	1	no
Glyma01g09120	Glyma01g09120	Glyma01g09120	Gm01:10765526-10768563	14-13-0	14-13-7	OK	8.90572	12.5237	0.491856	-0.801736	0.422706	0.764063	no
Glyma01g09160	Glyma01g09160	Glyma01g09160	Gm01:10877246-10880169	14-13-0	14-13-7	OK	2.64251	5.36739	1.02231	-1.70788	0.0876585	0.358551	no
Glyma01g09190	Glyma01g09190	Glyma01g09190	Gm01:10916139-10919654	14-13-0	14-13-7	NOTEST	0	0	0	0	1	1	no
Glyma01g09205	Glyma01g09205	Glyma01g09205	Gm01:10925539-10932891	14-13-0	14-13-7	OK	0.856618	0.267335	-1.68	1.68752	0.091503	0.367404	no
Glyma01g09220	Glyma01g09220	Glyma01g09220	Gm01:10985768-10988999	14-13-0	14-13-7	OK	2.53674	2.19091	-0.211445	0.330942	0.740689	0.925393	no
Glyma01g09251	Glyma01g09251	Glyma01g09251	Gm01:11062433-11064112	14-13-0	14-13-7	NOTEST	0	0	0	0	1	1	no
Glyma01g09280	Glyma01g09280	Glyma01g09280	Gm01:11172148-11173850	14-13-0	14-13-7	NOTEST	0	0	0	0	1	1	no
Glyma01g09290	Glyma01g09290	Glyma01g09290	Gm01:11208547-11216038	14-13-0	14-13-7	OK	6.62721	3.51603	-0.914453	1.55021	0.121091	0.426159	no
Glyma01g09310	Glyma01g09310	Glyma01g09310	Gm01:11247803-11256961	14-13-0	14-13-7	OK	87.667	30.9769	-1.50084	1.94225	0.0521074	0.26979	no
Glyma01g09340	Glyma01g09340	Glyma01g09340	Gm01:11290152-11290409	14-13-0	14-13-7	NOTEST	0	0	0	0	1	1	no
Glyma01g09350	Glyma01g09350	Glyma01g09350	Gm01:11294639-11296592	14-13-0	14-13-7	NOTEST	0	0.0231797	1.79769e+308	1.79769e+308	0.196186	1	no
Glyma01g09360	Glyma01g09360	Glyma01g09360	Gm01:11308064-11312690	14-13-0	14-13-7	OK	1.16477	1.66302	0.513765	-0.6798	0.496631	0.812155	no
Glyma01g09381	Glyma01g09381	Glyma01g09381	Gm01:11366555-11369128	14-13-0	14-13-7	NOTEST	0	0	0	0	1	1	no
Glyma01g09400	Glyma01g09400	Glyma01g09400	Gm01:11464172-11469476	14-13-0	14-13-7	OK	5.38921	3.75743	-0.520327	0.768228	0.442352	0.778166	no
Glyma01g09410	Glyma01g09410	Glyma01g09410	Gm01:11464172-11469476	14-13-0	14-13-7	NOTEST	0	0	0	0	1	1	no
Glyma01g09420	Glyma01g09420	Glyma01g09420	Gm01:11496634-11503018	14-13-0	14-13-7	OK	2.97816	1.86955	-0.671734	1.0222	0.306684	0.66561	no
Glyma01g09460	Glyma01g09460	Glyma01g09460	Gm01:11555183-11556227	14-13-0	14-13-7	OK	0.542599	1.4731	1.4409	-1.54146	0.123206	0.428546	no
Glyma01g09481	Glyma01g09481	Glyma01g09481	Gm01:11560220-11561128	14-13-0	14-13-7	NOTEST	0	0	0	0	1	1	no
Glyma01g09500	Glyma01g09500	Glyma01g09500	Gm01:11608787-11608970	14-13-0	14-13-7	NOTEST	0	0	0	0	1	1	no
Glyma01g09510	Glyma01g09510	Glyma01g09510	Gm01:11675230-11676337	14-13-0	14-13-7	NOTEST	0.0611266	0.0645506	0.0786306	-0.0455964	0.963632	1	no
Glyma01g09515	Glyma01g09515	Glyma01g09515	Gm01:11687514-11688465	14-13-0	14-13-7	NOTEST	0	0.0891291	1.79769e+308	1.79769e+308	0.196186	1	no
Glyma01g09520	Glyma01g09520	Glyma01g09520	Gm01:11695475-11701510	14-13-0	14-13-7	OK	14.6048	19.1325	0.389586	-0.618959	0.535944	0.835392	no
Glyma01g09530	Glyma01g09530	Glyma01g09530	Gm01:11703243-11703468	14-13-0	14-13-7	OK	0	3.31975	1.79769e+308	1.79769e+308	0.196186	0.540868	no
Glyma01g09540	Glyma01g09540	Glyma01g09540	Gm01:11708034-11708550	14-13-0	14-13-7	NOTEST	0	0	0	0	1	1	no
Glyma01g09581	Glyma01g09581	Glyma01g09581	Gm01:11738401-11738872	14-13-0	14-13-7	NOTEST	0	0	0	0	1	1	no
Glyma01g09620	Glyma01g09620	Glyma01g09620	Gm01:11916861-11920298	14-13-0	14-13-7	NOTEST	0	0	0	0	1	1	no
Glyma01g09631	Glyma01g09631	Glyma01g09631	Gm01:11934522-11935027	14-13-0	14-13-7	NOTEST	0	0	0	0	1	1	no
Glyma01g09640	Glyma01g09640	Glyma01g09640	Gm01:11967121-11968573	14-13-0	14-13-7	OK	4.00138	2.64509	-0.59718	0.949726	0.342251	0.698412	no
Glyma01g09650	Glyma01g09650	Glyma01g09650	Gm01:11971139-11974007	14-13-0	14-13-7	OK	0	0.521408	1.79769e+308	1.79769e+308	0.0134751	0.124749	no
Glyma01g09660	Glyma01g09660	Glyma01g09660	Gm01:11996466-12008222	14-13-0	14-13-7	OK	2.27548	0.886483	-1.36001	1.79939	0.0719572	0.321023	no
Glyma01g09860	Glyma01g09860	Glyma01g09860	Gm01:12384414-12385443	14-13-0	14-13-7	NOTEST	0	0	0	0	1	1	no
Glyma01g09900	Glyma01g09900	Glyma01g09900	Gm01:12528614-12537191	14-13-0	14-13-7	OK	0.386055	0.256619	-0.589178	0.603685	0.546053	0.840776	no
Glyma01g09920	Glyma01g09920	Glyma01g09920	Gm01:12588417-12590126	14-13-0	14-13-7	OK	3.01746	2.12556	-0.505495	0.759985	0.447264	0.781227	no
Glyma01g09948	Glyma01g09948	Glyma01g09948	Gm01:12598148-12598766	14-13-0	14-13-7	NOTEST	0	0	0	0	1	1	no
Glyma01g09976	Glyma01g09976	Glyma01g09976	Gm01:12599050-12599537	14-13-0	14-13-7	NOTEST	0	0	0	0	1	1	no
Glyma01g10004	Glyma01g10004	Glyma01g10004	Gm01:12745024-12746402	14-13-0	14-13-7	NOTEST	0	0	0	0	1	1	no
Glyma01g10032	Glyma01g10032	Glyma01g10032	Gm01:12760733-12762383	14-13-0	14-13-7	NOTEST	0	0	0	0	1	1	no
Glyma01g10060	Glyma01g10060	Glyma01g10060	Gm01:12803637-12806519	14-13-0	14-13-7	NOTEST	0	0	0	0	1	1	no
Glyma01g10070	Glyma01g10070	Glyma01g10070	Gm01:12864161-12867113	14-13-0	14-13-7	LOWDATA	0	0	-2.45326	0	1	1	no
Glyma01g10081	Glyma01g10081	Glyma01g10081	Gm01:12864161-12867113	14-13-0	14-13-7	OK	309.628	56.5372	-2.45326	2.90433	0.00368044	0.0575809	no
Glyma01g10090	Glyma01g10090	Glyma01g10090	Gm01:12870303-12870537	14-13-0	14-13-7	NOTEST	0	0	0	0	1	1	no
Glyma01g10100	Glyma01g10100	Glyma01g10100	Gm01:12915879-12921146	14-13-0	14-13-7	OK	1.26243	1.74416	0.466334	-0.745936	0.455706	0.787905	no
Glyma01g10121	Glyma01g10121	Glyma01g10121	Gm01:13008740-13009964	14-13-0	14-13-7	NOTEST	0.0955224	0	-1.79769e+308	-1.79769e+308	0.123372	1	no
Glyma01g10141	Glyma01g10141	Glyma01g10141	Gm01:13045087-13045509	14-13-0	14-13-7	NOTEST	0	0	0	0	1	1	no
Glyma01g10160	Glyma01g10160	Glyma01g10160	Gm01:13068289-13070591	14-13-0	14-13-7	OK	1.17324	1.39239	0.247072	-0.267691	0.788937	0.944407	no
Glyma01g10183	Glyma01g10183	Glyma01g10183	Gm01:13094881-13100738	14-13-0	14-13-7	NOTEST	0	0	0	0	1	1	no
Glyma01g10206	Glyma01g10206	Glyma01g10206	Gm01:13259515-13263715	14-13-0	14-13-7	NOTEST	0	0	0	0	1	1	no
Glyma01g10231	Glyma01g10231	Glyma01g10231	Gm01:13305441-13308517	14-13-0	14-13-7	NOTEST	0	0	0	0	1	1	no
Glyma01g10254	Glyma01g10254	Glyma01g10254	Gm01:13309389-13321481	14-13-0	14-13-7	NOTEST	0	0.0197579	1.79769e+308	1.79769e+308	0.0692411	1	no
Glyma01g10278	Glyma01g10278	Glyma01g10278	Gm01:13324783-13327645	14-13-0	14-13-7	NOTEST	0	0	0	0	1	1	no
Glyma01g10302	Glyma01g10302	Glyma01g10302	Gm01:13355409-13356481	14-13-0	14-13-7	NOTEST	0	0	0	0	1	1	no
Glyma01g10326	Glyma01g10326	Glyma01g10326	Gm01:13416710-13417813	14-13-0	14-13-7	NOTEST	0	0	0	0	1	1	no
Glyma01g10350	Glyma01g10350	Glyma01g10350	Gm01:13419562-13420937	14-13-0	14-13-7	NOTEST	0	0	0	0	1	1	no
Glyma01g10371	Glyma01g10371	Glyma01g10371	Gm01:13433576-13434202	14-13-0	14-13-7	OK	1.8598	3.23508	0.798652	-1.00805	0.313432	0.672163	no
Glyma01g10390	Glyma01g10390	Glyma01g10390	Gm01:13444506-13445181	14-13-0	14-13-7	NOTEST	0.210627	0.240808	0.193192	-0.112028	0.910801	1	no
Glyma01g10600	Glyma01g10600	Glyma01g10600	Gm01:13782194-13783121	14-13-0	14-13-7	NOTEST	0	0.147389	1.79769e+308	1.79769e+308	0.0523416	1	no
Glyma01g10610	Glyma01g10610	Glyma01g10610	Gm01:13795843-13799755	14-13-0	14-13-7	OK	2.36521	3.16601	0.420699	-0.694774	0.487197	0.808056	no
Glyma01g10730	Glyma01g10730	Glyma01g10730	Gm01:13960625-13962588	14-13-0	14-13-7	OK	0.427067	0.270703	-0.657751	0.645254	0.518763	0.824805	no
Glyma01g10850	Glyma01g10850	Glyma01g10850	Gm01:14070871-14087892	14-13-0	14-13-7	OK	3.05547	2.28633	-0.418356	0.649419	0.516068	0.823522	no
Glyma01g10880	Glyma01g10880	Glyma01g10880	Gm01:14112119-14118766	14-13-0	14-13-7	OK	2.61603	2.6377	0.0119021	-0.0183739	0.985341	0.997162	no
Glyma01g10900	Glyma01g10900	Glyma01g10900	Gm01:14129302-14130710	14-13-0	14-13-7	NOTEST	0	0	0	0	1	1	no
Glyma01g11110	Glyma01g11110	Glyma01g11110	Gm01:14247142-14248189	14-13-0	14-13-7	NOTEST	0	0.128388	1.79769e+308	1.79769e+308	0.0523416	1	no
Glyma01g11130	Glyma01g11130	Glyma01g11130	Gm01:14320794-14324110	14-13-0	14-13-7	NOTEST	0.0571952	0.24327	2.08859	-1.42602	0.153861	1	no
Glyma01g11180	Glyma01g11180	Glyma01g11180	Gm01:14568533-14568824	14-13-0	14-13-7	OK	24723.7	17983.2	-0.45925	0.460052	0.645479	0.888861	no
Glyma01g11390	Glyma01g11390	Glyma01g11390	Gm01:14807028-14809655	14-13-0	14-13-7	OK	14.6972	14.2499	-0.0445925	0.0675273	0.946162	0.989087	no
Glyma01g11473	Glyma01g11473	Glyma01g11473	Gm01:14947313-14947773	14-13-0	14-13-7	NOTEST	0	0	0	0	1	1	no
Glyma01g11556	Glyma01g11556	Glyma01g11556	Gm01:14947841-14948129	14-13-0	14-13-7	NOTEST	0	0	0	0	1	1	no
Glyma01g11640	Glyma01g11640	Glyma01g11640	Gm01:14972818-14973806	14-13-0	14-13-7	OK	139.037	60.9684	-1.18934	1.7749	0.0759143	0.331796	no
Glyma01g11755	Glyma01g11755	Glyma01g11755	Gm01:15083417-15085790	14-13-0	14-13-7	NOTEST	0	0	0	0	1	1	no
Glyma01g11870	Glyma01g11870	Glyma01g11870	Gm01:15195053-15195880	14-13-0	14-13-7	OK	64.7629	90.983	0.49043	-0.76662	0.443307	0.778343	no
Glyma01g12310	Glyma01g12310	Glyma01g12310	Gm01:15500343-15500912	14-13-0	14-13-7	NOTEST	0	0	0	0	1	1	no
Glyma01g12340	Glyma01g12340	Glyma01g12340	Gm01:15542210-15548262	14-13-0	14-13-7	OK	7.56999	8.10587	0.0986745	-0.168298	0.866348	0.969601	no
Glyma01g12740	Glyma01g12740	Glyma01g12740	Gm01:15937028-15939729	14-13-0	14-13-7	OK	4.37455	5.26046	0.266054	-0.461915	0.644142	0.888368	no
Glyma01g12840	Glyma01g12840	Glyma01g12840	Gm01:15948220-15953470	14-13-0	14-13-7	NOTEST	0	0.218207	1.79769e+308	1.79769e+308	0.0485508	1	no
Glyma01g12940	Glyma01g12940	Glyma01g12940	Gm01:16087453-16089518	14-13-0	14-13-7	OK	0.252213	0.838371	1.73295	-1.93456	0.0530445	0.271686	no
Glyma01g12955	Glyma01g12955	Glyma01g12955	Gm01:16103170-16106499	14-13-0	14-13-7	NOTEST	0	0	0	0	1	1	no
Glyma01g12970	Glyma01g12970	Glyma01g12970	Gm01:16134796-16136261	14-13-0	14-13-7	OK	3.52315	6.93053	0.976099	-1.64307	0.100369	0.385777	no
Glyma01g13170	Glyma01g13170	Glyma01g13170	Gm01:16335425-16339127	14-13-0	14-13-7	OK	120.835	26.6928	-2.17851	2.83769	0.00454409	0.0656603	no
Glyma01g13390	Glyma01g13390	Glyma01g13390	Gm01:16722784-16724403	14-13-0	14-13-7	NOTEST	0	0	0	0	1	1	no
Glyma01g13400	Glyma01g13400	Glyma01g13400	Gm01:16727753-16728455	14-13-0	14-13-7	NOTEST	0	0	0	0	1	1	no
Glyma01g13410	Glyma01g13410	Glyma01g13410	Gm01:16732842-16733939	14-13-0	14-13-7	NOTEST	0	0	0	0	1	1	no
Glyma01g13532	Glyma01g13532	Glyma01g13532	Gm01:16745457-16750194	14-13-0	14-13-7	OK	0.382418	0.244412	-0.645837	0.472469	0.636592	0.886214	no
Glyma01g13654	Glyma01g13654	Glyma01g13654	Gm01:16827427-16868761	14-13-0	14-13-7	OK	2.86078	3.05144	0.0930795	-0.146605	0.883444	0.974543	no
Glyma01g13777	Glyma01g13777	Glyma01g13777	Gm01:16940733-16941754	14-13-0	14-13-7	NOTEST	0	0	0	0	1	1	no
Glyma01g13900	Glyma01g13900	Glyma01g13900	Gm01:17306260-17308391	14-13-0	14-13-7	NOTEST	0	0	0	0	1	1	no
Glyma01g13930	Glyma01g13930	Glyma01g13930	Gm01:17320003-17321677	14-13-0	14-13-7	OK	0.390721	0.240138	-0.702278	0.715907	0.474049	0.799457	no
Glyma01g13945	Glyma01g13945	Glyma01g13945	Gm01:17420498-17470577	14-13-0	14-13-7	OK	0.414095	0.525448	0.343587	-0.378004	0.705427	0.913228	no
Glyma01g13960	Glyma01g13960	Glyma01g13960	Gm01:17481711-17482061	14-13-0	14-13-7	NOTEST	0	0	0	0	1	1	no
Glyma01g14160	Glyma01g14160	Glyma01g14160	Gm01:17627819-17629241	14-13-0	14-13-7	NOTEST	0	0	0	0	1	1	no
Glyma01g14266	Glyma01g14266	Glyma01g14266	Gm01:17633685-17639586	14-13-0	14-13-7	NOTEST	0	0	0	0	1	1	no
Glyma01g14373	Glyma01g14373	Glyma01g14373	Gm01:18006948-18034570	14-13-0	14-13-7	OK	6.80101	6.01055	-0.17825	0.306744	0.759038	0.933145	no
Glyma01g14480	Glyma01g14480	Glyma01g14480	Gm01:18042133-18046082	14-13-0	14-13-7	OK	30.542	16.3962	-0.897433	1.54141	0.123217	0.428546	no
Glyma01g14500	Glyma01g14500	Glyma01g14500	Gm01:18130228-18132625	14-13-0	14-13-7	NOTEST	0	0	0	0	1	1	no
Glyma01g14700	Glyma01g14700	Glyma01g14700	Gm01:18300892-18301399	14-13-0	14-13-7	OK	6.18712	4.34042	-0.511434	0.699911	0.483983	0.805553	no
Glyma01g14733	Glyma01g14733	Glyma01g14733	Gm01:18318922-18323085	14-13-0	14-13-7	OK	0.744917	0.622754	-0.258419	0.334111	0.738296	0.924439	no
Glyma01g14766	Glyma01g14766	Glyma01g14766	Gm01:18346082-18347761	14-13-0	14-13-7	NOTEST	0.264596	0.209195	-0.338948	0.333048	0.739098	1	no
Glyma01g14800	Glyma01g14800	Glyma01g14800	Gm01:18356149-18373966	14-13-0	14-13-7	OK	5.94184	3.42244	-0.795882	1.33754	0.181046	0.521942	no
Glyma01g14905	Glyma01g14905	Glyma01g14905	Gm01:18507857-18508875	14-13-0	14-13-7	NOTEST	0	0	0	0	1	1	no
Glyma01g15010	Glyma01g15010	Glyma01g15010	Gm01:18517441-18518370	14-13-0	14-13-7	NOTEST	0	0	0	0	1	1	no
Glyma01g15134	Glyma01g15134	Glyma01g15134	Gm01:18526281-18533321	14-13-0	14-13-7	OK	1.99101	0.801197	-1.31327	1.8556	0.0635106	0.300353	no
Glyma01g15258	Glyma01g15258	Glyma01g15258	Gm01:18637238-18640215	14-13-0	14-13-7	NOTEST	0	0.145981	1.79769e+308	1.79769e+308	0.0342161	1	no
Glyma01g15382	Glyma01g15382	Glyma01g15382	Gm01:18694961-18695204	14-13-0	14-13-7	NOTEST	0	0	0	0	1	1	no
Glyma01g15506	Glyma01g15506	Glyma01g15506	Gm01:18952413-18962622	14-13-0	14-13-7	OK	32.2558	16.8073	-0.94047	1.2794	0.200755	0.545664	no
Glyma01g15630	Glyma01g15630	Glyma01g15630	Gm01:19254139-19255483	14-13-0	14-13-7	OK	0.510733	0.102106	-2.3225	1.95132	0.0510191	0.267033	no
Glyma01g15687	Glyma01g15687	Glyma01g15687	Gm01:19474756-19475786	14-13-0	14-13-7	NOTEST	0	0	0	0	1	1	no
Glyma01g15744	Glyma01g15744	Glyma01g15744	Gm01:19561924-19565934	14-13-0	14-13-7	NOTEST	0	0	0	0	1	1	no
Glyma01g15802	Glyma01g15802	Glyma01g15802	Gm01:19569955-19570642	14-13-0	14-13-7	NOTEST	0	0	0	0	1	1	no
Glyma01g15860	Glyma01g15860	Glyma01g15860	Gm01:19642510-19643505	14-13-0	14-13-7	NOTEST	0	0	0	0	1	1	no
Glyma01g15883	Glyma01g15883	Glyma01g15883	Gm01:19661251-19662687	14-13-0	14-13-7	NOTEST	0	0	0	0	1	1	no
Glyma01g15906	Glyma01g15906	Glyma01g15906	Gm01:19730841-19731653	14-13-0	14-13-7	NOTEST	0	0	0	0	1	1	no
Glyma01g15930	Glyma01g15930	Glyma01g15930	Gm01:19793857-19799930	14-13-0	14-13-7	OK	47.2761	26.848	-0.816298	1.18525	0.235917	0.592088	no
Glyma01g16140	Glyma01g16140	Glyma01g16140	Gm01:20041371-20043743	14-13-0	14-13-7	OK	0.110543	1.91885	4.11756	-3.9417	8.09056e-05	0.00393802	yes
Glyma01g16250	Glyma01g16250	Glyma01g16250	Gm01:20048200-20050535	14-13-0	14-13-7	NOTEST	0	0	0	0	1	1	no
Glyma01g16360	Glyma01g16360	Glyma01g16360	Gm01:20233418-20235447	14-13-0	14-13-7	OK	1.36869	0.758079	-0.852376	0.970061	0.332016	0.688927	no
Glyma01g16370	Glyma01g16370	Glyma01g16370	Gm01:20243646-20255339	14-13-0	14-13-7	OK	7.06066	6.65566	-0.0852222	0.124418	0.900984	0.97894	no
Glyma01g16375	Glyma01g16375	Glyma01g16375	Gm01:20243646-20255339	14-13-0	14-13-7	OK	1.20168	1.11296	-0.110654	0.0110508	0.991183	0.997966	no
Glyma01g16380	Glyma01g16380	Glyma01g16380	Gm01:20340974-20356558	14-13-0	14-13-7	OK	34.6652	20.3405	-0.769135	1.1631	0.244787	0.602963	no
Glyma01g16526	Glyma01g16526	Glyma01g16526	Gm01:20473820-20507463	14-13-0	14-13-7	OK	4.89343	3.92232	-0.319139	0.442439	0.658172	0.894367	no
Glyma01g16673	Glyma01g16673	Glyma01g16673	Gm01:20473820-20507463	14-13-0	14-13-7	NOTEST	0.0983807	0.265859	1.43422	-0.489311	0.624621	1	no
Glyma01g16820	Glyma01g16820	Glyma01g16820	Gm01:20713503-20720624	14-13-0	14-13-7	OK	6.82737	4.24711	-0.684849	1.19046	0.233867	0.589258	no
Glyma01g17030	Glyma01g17030	Glyma01g17030	Gm01:21011809-21014457	14-13-0	14-13-7	OK	0.188612	0.640045	1.76275	-1.59517	0.110673	0.406865	no
Glyma01g17230	Glyma01g17230	Glyma01g17230	Gm01:21161585-21162372	14-13-0	14-13-7	OK	12.4222	7.6977	-0.690424	1.15476	0.248187	0.60717	no
Glyma01g17240	Glyma01g17240	Glyma01g17240	Gm01:21232889-21235373	14-13-0	14-13-7	OK	1.71429	1.20719	-0.505963	0.65967	0.509465	0.819018	no
Glyma01g17271	Glyma01g17271	Glyma01g17271	Gm01:21300956-21302664	14-13-0	14-13-7	NOTEST	0	0	0	0	1	1	no
Glyma01g17300	Glyma01g17300	Glyma01g17300	Gm01:21447376-21448520	14-13-0	14-13-7	OK	33.3456	21.177	-0.654996	1.07219	0.283634	0.643353	no
Glyma01g17330	Glyma01g17330	Glyma01g17330	Gm01:21487778-21490647	14-13-0	14-13-7	NOTEST	0	0	0	0	1	1	no
Glyma01g17350	Glyma01g17350	Glyma01g17350	Gm01:21601999-21604652	14-13-0	14-13-7	OK	3.5265	4.04634	0.198382	-0.344903	0.730167	0.921374	no
Glyma01g17426	Glyma01g17426	Glyma01g17426	Gm01:21677182-21677611	14-13-0	14-13-7	NOTEST	0	0	0	0	1	1	no
Glyma01g17503	Glyma01g17503	Glyma01g17503	Gm01:21677719-21680521	14-13-0	14-13-7	NOTEST	0	0	0	0	1	1	no
Glyma01g17580	Glyma01g17580	Glyma01g17580	Gm01:21886080-21888825	14-13-0	14-13-7	NOTEST	0	0	0	0	1	1	no
Glyma01g17590	Glyma01g17590	Glyma01g17590	Gm01:21937384-21937864	14-13-0	14-13-7	NOTEST	0	0	0	0	1	1	no
Glyma01g17820	Glyma01g17820	Glyma01g17820	Gm01:22078170-22079110	14-13-0	14-13-7	OK	32.2796	43.0518	0.415448	-0.699623	0.484163	0.805725	no
Glyma01g17850	Glyma01g17850	Glyma01g17850	Gm01:22130113-22137111	14-13-0	14-13-7	OK	77.8932	34.8845	-1.15891	1.4873	0.136936	0.451915	no
Glyma01g17870	Glyma01g17870	Glyma01g17870	Gm01:22202473-22210341	14-13-0	14-13-7	OK	15.4227	11.3441	-0.443104	0.681269	0.495701	0.811915	no
Glyma01g17880	Glyma01g17880	Glyma01g17880	Gm01:22222121-22222938	14-13-0	14-13-7	NOTEST	0	0	0	0	1	1	no
Glyma01g18040	Glyma01g18040	Glyma01g18040	Gm01:22484144-22487576	14-13-0	14-13-7	OK	8.66208	9.39604	0.11734	-0.191851	0.847859	0.96489	no
Glyma01g18200	Glyma01g18200	Glyma01g18200	Gm01:22687069-22688346	14-13-0	14-13-7	OK	6.33061	0	-1.79769e+308	-1.79769e+308	0.0414546	0.237071	no
Glyma01g18360	Glyma01g18360	Glyma01g18360	Gm01:22689358-22689601	14-13-0	14-13-7	OK	0	2.86846	1.79769e+308	1.79769e+308	0.0692411	0.314838	no
Glyma01g18520	Glyma01g18520	Glyma01g18520	Gm01:22790155-22793135	14-13-0	14-13-7	NOTEST	0	0	0	0	1	1	no
Glyma01g18606	Glyma01g18606	Glyma01g18606	Gm01:23174174-23175344	14-13-0	14-13-7	NOTEST	0	0	0	0	1	1	no
Glyma01g18693	Glyma01g18693	Glyma01g18693	Gm01:23245420-23247113	14-13-0	14-13-7	NOTEST	0	0	0	0	1	1	no
Glyma01g18780	Glyma01g18780	Glyma01g18780	Gm01:23303293-23306986	14-13-0	14-13-7	OK	23.9479	10.7612	-1.15406	1.94485	0.0517925	0.268844	no
Glyma01g18885	Glyma01g18885	Glyma01g18885	Gm01:23422050-23424265	14-13-0	14-13-7	NOTEST	0	0	0	0	1	1	no
Glyma01g18990	Glyma01g18990	Glyma01g18990	Gm01:23424891-23425203	14-13-0	14-13-7	NOTEST	0	0	0	0	1	1	no
Glyma01g19200	Glyma01g19200	Glyma01g19200	Gm01:23586981-23590259	14-13-0	14-13-7	OK	6.90679	4.6973	-0.556184	0.880702	0.378479	0.728496	no
Glyma01g19420	Glyma01g19420	Glyma01g19420	Gm01:23910735-23912214	14-13-0	14-13-7	OK	25.0345	9.14201	-1.45334	2.44497	0.0144865	0.130415	no
Glyma01g19820	Glyma01g19820	Glyma01g19820	Gm01:24220923-24227067	14-13-0	14-13-7	OK	1.33409	1.53342	0.2009	-0.290747	0.771245	0.937736	no
Glyma01g20030	Glyma01g20030	Glyma01g20030	Gm01:24388541-24405141	14-13-0	14-13-7	OK	10.6217	8.91576	-0.252587	0.342643	0.731867	0.921981	no
Glyma01g20130	Glyma01g20130	Glyma01g20130	Gm01:24561667-24562473	14-13-0	14-13-7	NOTEST	0	0	0	0	1	1	no
Glyma01g20230	Glyma01g20230	Glyma01g20230	Gm01:24590327-24594299	14-13-0	14-13-7	OK	2.51087	1.84923	-0.441259	0.589778	0.555339	0.845377	no
Glyma01g20306	Glyma01g20306	Glyma01g20306	Gm01:24680832-24681420	14-13-0	14-13-7	NOTEST	0	0	0	0	1	1	no
Glyma01g20383	Glyma01g20383	Glyma01g20383	Gm01:24850234-24853077	14-13-0	14-13-7	OK	8.06122	3.01161	-1.42047	2.4144	0.015761	0.136998	no
Glyma01g20460	Glyma01g20460	Glyma01g20460	Gm01:24945683-24950931	14-13-0	14-13-7	OK	22.9996	28.4072	0.304648	-0.445257	0.656134	0.893127	no
Glyma01g20565	Glyma01g20565	Glyma01g20565	Gm01:25139086-25141476	14-13-0	14-13-7	NOTEST	0	0	0	0	1	1	no
Glyma01g20670	Glyma01g20670	Glyma01g20670	Gm01:25147643-25157143	14-13-0	14-13-7	OK	20.4098	20.3764	-0.00235914	0.00385097	0.996927	0.999267	no
Glyma01g20700	Glyma01g20700	Glyma01g20700	Gm01:25222324-25227920	14-13-0	14-13-7	OK	19.2332	32.4176	0.753181	-1.14068	0.254001	0.612382	no
Glyma01g20710	Glyma01g20710	Glyma01g20710	Gm01:25241778-25246814	14-13-0	14-13-7	OK	0.0538985	0.831936	3.94816	-3.75968	0.000170134	0.00696634	yes
Glyma01g20720	Glyma01g20720	Glyma01g20720	Gm01:25343080-25358309	14-13-0	14-13-7	OK	1.99489	1.36767	-0.544588	0.839898	0.400966	0.746536	no
Glyma01g20740	Glyma01g20740	Glyma01g20740	Gm01:25402501-25405946	14-13-0	14-13-7	OK	0.659615	0.48973	-0.429637	0.491243	0.623255	0.878969	no
Glyma01g20751	Glyma01g20751	Glyma01g20751	Gm01:25409531-25409921	14-13-0	14-13-7	NOTEST	0	0	0	0	1	1	no
Glyma01g20760	Glyma01g20760	Glyma01g20760	Gm01:25500530-25509163	14-13-0	14-13-7	OK	19.0835	17.2581	-0.145056	0.217202	0.828051	0.959307	no
Glyma01g20775	Glyma01g20775	Glyma01g20775	Gm01:25559739-25563228	14-13-0	14-13-7	OK	14.8747	14.7424	-0.0128864	0.0207125	0.983475	0.997056	no
Glyma01g20790	Glyma01g20790	Glyma01g20790	Gm01:25566713-25569152	14-13-0	14-13-7	OK	0.172909	0.961925	2.47591	-2.23278	0.0255633	0.180582	no
Glyma01g20800	Glyma01g20800	Glyma01g20800	Gm01:25569808-25571509	14-13-0	14-13-7	NOTEST	0	0.147401	1.79769e+308	1.79769e+308	0.0692411	1	no
Glyma01g20811	Glyma01g20811	Glyma01g20811	Gm01:25640214-25651295	14-13-0	14-13-7	OK	4.21007	5.464	0.376113	-0.623374	0.533039	0.833437	no
Glyma01g20820	Glyma01g20820	Glyma01g20820	Gm01:25640214-25651295	14-13-0	14-13-7	LOWDATA	0	0	0.376113	0	1	1	no
Glyma01g20860	Glyma01g20860	Glyma01g20860	Gm01:25711548-25714121	14-13-0	14-13-7	OK	39.5126	26.5622	-0.572939	0.854001	0.393104	0.741139	no
Glyma01g20870	Glyma01g20870	Glyma01g20870	Gm01:25714752-25716813	14-13-0	14-13-7	NOTEST	0.155793	0.195368	0.326566	-0.28434	0.77615	1	no
Glyma01g20885	Glyma01g20885	Glyma01g20885	Gm01:25783765-25787946	14-13-0	14-13-7	NOTEST	0	0	0	0	1	1	no
Glyma01g20900	Glyma01g20900	Glyma01g20900	Gm01:25807514-25813526	14-13-0	14-13-7	NOTEST	0	0	0	0	1	1	no
Glyma01g20910	Glyma01g20910	Glyma01g20910	Gm01:25867401-25867807	14-13-0	14-13-7	NOTEST	0	0	0	0	1	1	no
Glyma01g20920	Glyma01g20920	Glyma01g20920	Gm01:25867821-25870459	14-13-0	14-13-7	OK	1.9168	1.80192	-0.0891662	0.102223	0.91858	0.982989	no
Glyma01g20935	Glyma01g20935	Glyma01g20935	Gm01:25874290-25875066	14-13-0	14-13-7	OK	0.365643	0.426032	0.220529	-0.173777	0.86204	0.969063	no
Glyma01g20950	Glyma01g20950	Glyma01g20950	Gm01:26043470-26048530	14-13-0	14-13-7	OK	1.86711	0.651842	-1.51821	2.1522	0.0313815	0.203116	no
Glyma01g20970	Glyma01g20970	Glyma01g20970	Gm01:26111521-26112660	14-13-0	14-13-7	NOTEST	0	0	0	0	1	1	no
Glyma01g20980	Glyma01g20980	Glyma01g20980	Gm01:26203747-26206343	14-13-0	14-13-7	NOTEST	0	0	0	0	1	1	no
Glyma01g20986	Glyma01g20986	Glyma01g20986	Gm01:26214735-26217244	14-13-0	14-13-7	NOTEST	0	0	0	0	1	1	no
Glyma01g20993	Glyma01g20993	Glyma01g20993	Gm01:26218166-26218983	14-13-0	14-13-7	NOTEST	0	0	0	0	1	1	no
Glyma01g21000	Glyma01g21000	Glyma01g21000	Gm01:26227617-26228265	14-13-0	14-13-7	NOTEST	0	0	0	0	1	1	no
Glyma01g21120	Glyma01g21120	Glyma01g21120	Gm01:26230555-26237293	14-13-0	14-13-7	NOTEST	0	0	0	0	1	1	no
Glyma01g21241	Glyma01g21241	Glyma01g21241	Gm01:26358875-26362351	14-13-0	14-13-7	NOTEST	0	0	0	0	1	1	no
Glyma01g21360	Glyma01g21360	Glyma01g21360	Gm01:26380864-26392487	14-13-0	14-13-7	OK	2.656	3.02766	0.188947	-0.274656	0.783581	0.942331	no
Glyma01g21480	Glyma01g21480	Glyma01g21480	Gm01:26542098-26544485	14-13-0	14-13-7	OK	1.15777	3.07414	1.40883	-2.21828	0.026536	0.184621	no
Glyma01g21500	Glyma01g21500	Glyma01g21500	Gm01:26596018-26599902	14-13-0	14-13-7	OK	41.5918	26.3831	-0.656683	1.07829	0.280903	0.640651	no
Glyma01g21510	Glyma01g21510	Glyma01g21510	Gm01:26672645-26677024	14-13-0	14-13-7	OK	2.57011	1.30687	-0.975708	1.1165	0.264208	0.623684	no
Glyma01g21521	Glyma01g21521	Glyma01g21521	Gm01:26725662-26726466	14-13-0	14-13-7	NOTEST	0	0	0	0	1	1	no
Glyma01g21530	Glyma01g21530	Glyma01g21530	Gm01:26737266-26739888	14-13-0	14-13-7	NOTEST	0.0790882	0.0441969	-0.839519	0.307743	0.758278	1	no
Glyma01g21540	Glyma01g21540	Glyma01g21540	Gm01:26740703-26749646	14-13-0	14-13-7	OK	0	0.372961	1.79769e+308	1.79769e+308	0.0445687	0.24675	no
Glyma01g21570	Glyma01g21570	Glyma01g21570	Gm01:26771286-26773122	14-13-0	14-13-7	NOTEST	0.0332133	0.0538781	0.697937	-0.312146	0.75493	1	no
Glyma01g21575	Glyma01g21575	Glyma01g21575	Gm01:26798193-26799005	14-13-0	14-13-7	NOTEST	0	0	0	0	1	1	no
Glyma01g21580	Glyma01g21580	Glyma01g21580	Gm01:26814403-26817180	14-13-0	14-13-7	NOTEST	0.0657403	0.0353469	-0.895195	0.522896	0.601047	1	no
Glyma01g21590	Glyma01g21590	Glyma01g21590	Gm01:26883578-26885952	14-13-0	14-13-7	NOTEST	0	0	0	0	1	1	no
Glyma01g21620	Glyma01g21620	Glyma01g21620	Gm01:26918441-26921225	14-13-0	14-13-7	NOTEST	0.27488	0.275289	0.00214441	-0.0021629	0.998274	1	no
Glyma01g21630	Glyma01g21630	Glyma01g21630	Gm01:26936772-26938129	14-13-0	14-13-7	NOTEST	0	0	0	0	1	1	no
Glyma01g21660	Glyma01g21660	Glyma01g21660	Gm01:27033743-27042354	14-13-0	14-13-7	OK	1.39772	0.795374	-0.813374	1.07943	0.280394	0.64033	no
Glyma01g21680	Glyma01g21680	Glyma01g21680	Gm01:27082459-27084583	14-13-0	14-13-7	OK	4.09492	3.0058	-0.446087	0.699862	0.484014	0.805564	no
Glyma01g21707	Glyma01g21707	Glyma01g21707	Gm01:27099239-27134127	14-13-0	14-13-7	OK	2.69007	3.49911	0.379345	-0.580438	0.561619	0.849282	no
Glyma01g21734	Glyma01g21734	Glyma01g21734	Gm01:27099239-27134127	14-13-0	14-13-7	OK	0.332388	0.603994	0.861667	-0.586941	0.557244	0.846701	no
Glyma01g21762	Glyma01g21762	Glyma01g21762	Gm01:27142763-27149757	14-13-0	14-13-7	NOTEST	0	0	0	0	1	1	no
Glyma01g21790	Glyma01g21790	Glyma01g21790	Gm01:27193609-27195324	14-13-0	14-13-7	NOTEST	0	0	0	0	1	1	no
Glyma01g21831	Glyma01g21831	Glyma01g21831	Gm01:27209475-27244035	14-13-0	14-13-7	OK	0.280611	0.452872	0.690534	-0.748753	0.454006	0.786621	no
Glyma01g21870	Glyma01g21870	Glyma01g21870	Gm01:27283470-27283944	14-13-0	14-13-7	NOTEST	0	0	0	0	1	1	no
Glyma01g21900	Glyma01g21900	Glyma01g21900	Gm01:27377288-27379936	14-13-0	14-13-7	OK	2.82788	1.40128	-1.01297	1.51784	0.129056	0.438726	no
Glyma01g22120	Glyma01g22120	Glyma01g22120	Gm01:27653934-27655968	14-13-0	14-13-7	NOTEST	0	0	0	0	1	1	no
Glyma01g22131	Glyma01g22131	Glyma01g22131	Gm01:27671430-27681519	14-13-0	14-13-7	NOTEST	0	0	0	0	1	1	no
Glyma01g22140	Glyma01g22140	Glyma01g22140	Gm01:27681952-27683220	14-13-0	14-13-7	NOTEST	0	0	0	0	1	1	no
Glyma01g22160	Glyma01g22160	Glyma01g22160	Gm01:27743827-27745117	14-13-0	14-13-7	OK	1.98896	2.56682	0.367971	-0.513404	0.607668	0.872739	no
Glyma01g22170	Glyma01g22170	Glyma01g22170	Gm01:27746481-27751766	14-13-0	14-13-7	OK	20.5508	7.42478	-1.46878	2.50093	0.0123866	0.118238	no
Glyma01g22180	Glyma01g22180	Glyma01g22180	Gm01:27781683-27784987	14-13-0	14-13-7	OK	14.2879	5.20079	-1.45799	2.39967	0.0164099	0.139672	no
Glyma01g22195	Glyma01g22195	Glyma01g22195	Gm01:27825362-27840530	14-13-0	14-13-7	NOTEST	0	0.0553561	1.79769e+308	1.79769e+308	0.243829	1	no
Glyma01g22210	Glyma01g22210	Glyma01g22210	Gm01:27825362-27840530	14-13-0	14-13-7	OK	2.19982	1.40346	-0.648392	0.801948	0.422583	0.764042	no
Glyma01g22260	Glyma01g22260	Glyma01g22260	Gm01:27963645-27965402	14-13-0	14-13-7	OK	2.28837	8.19247	1.83998	-3.05303	0.00226542	0.0427208	yes
Glyma01g22333	Glyma01g22333	Glyma01g22333	Gm01:28079064-28083033	14-13-0	14-13-7	OK	0.684362	0	-1.79769e+308	-1.79769e+308	0.023028	0.170569	no
Glyma01g22406	Glyma01g22406	Glyma01g22406	Gm01:28104831-28117466	14-13-0	14-13-7	OK	6.10061	11.1102	0.864857	-1.45112	0.146746	0.469405	no
Glyma01g22480	Glyma01g22480	Glyma01g22480	Gm01:28151173-28153211	14-13-0	14-13-7	OK	4.73924	5.76491	0.282644	-0.492181	0.622591	0.878847	no
Glyma01g22490	Glyma01g22490	Glyma01g22490	Gm01:28188535-28194784	14-13-0	14-13-7	OK	22.6444	12.1727	-0.895507	1.42254	0.15487	0.482181	no
Glyma01g22501	Glyma01g22501	Glyma01g22501	Gm01:28205872-28206502	14-13-0	14-13-7	NOTEST	0	0	0	0	1	1	no
Glyma01g22510	Glyma01g22510	Glyma01g22510	Gm01:28236453-28241841	14-13-0	14-13-7	OK	1.20538	3.18165	1.40029	-2.08123	0.0374127	0.223934	no
Glyma01g22530	Glyma01g22530	Glyma01g22530	Gm01:28336960-28340913	14-13-0	14-13-7	NOTEST	0.2247	0.29119	0.373962	-0.378897	0.704764	1	no
Glyma01g22542	Glyma01g22542	Glyma01g22542	Gm01:28390587-28392968	14-13-0	14-13-7	OK	0.384706	2.54449	2.72555	-2.68798	0.00718849	0.0867066	no
Glyma01g22554	Glyma01g22554	Glyma01g22554	Gm01:28393068-28396339	14-13-0	14-13-7	OK	0.417749	2.01109	2.26727	-2.8376	0.00454544	0.0656603	no
Glyma01g22567	Glyma01g22567	Glyma01g22567	Gm01:28416197-28418758	14-13-0	14-13-7	NOTEST	0	0	0	0	1	1	no
Glyma01g22580	Glyma01g22580	Glyma01g22580	Gm01:28513351-28526497	14-13-0	14-13-7	OK	2.63164	2.14593	-0.294354	0.429566	0.667511	0.898951	no
Glyma01g22600	Glyma01g22600	Glyma01g22600	Gm01:28536103-28539838	14-13-0	14-13-7	OK	18.4887	15.2597	-0.276915	0.415649	0.677667	0.902699	no
Glyma01g22610	Glyma01g22610	Glyma01g22610	Gm01:28541141-28542499	14-13-0	14-13-7	NOTEST	0.279114	0.150647	-0.889686	0.750421	0.453001	1	no
Glyma01g22620	Glyma01g22620	Glyma01g22620	Gm01:28543689-28553173	14-13-0	14-13-7	OK	124.872	51.8056	-1.26926	1.48705	0.137001	0.451915	no
Glyma01g22630	Glyma01g22630	Glyma01g22630	Gm01:28591482-28597660	14-13-0	14-13-7	OK	4.17714	3.0137	-0.470982	0.796669	0.425643	0.766456	no
Glyma01g22641	Glyma01g22641	Glyma01g22641	Gm01:28636476-28637827	14-13-0	14-13-7	OK	1.02914	1.18841	0.207599	-0.253607	0.799799	0.949154	no
Glyma01g22650	Glyma01g22650	Glyma01g22650	Gm01:28639438-28642822	14-13-0	14-13-7	NOTEST	0	0	0	0	1	1	no
Glyma01g22670	Glyma01g22670	Glyma01g22670	Gm01:28699702-28704423	14-13-0	14-13-7	NOTEST	0.0459243	0	-1.79769e+308	-1.79769e+308	0.123372	1	no
Glyma01g22680	Glyma01g22680	Glyma01g22680	Gm01:28708173-28714632	14-13-0	14-13-7	OK	18.7118	18.1492	-0.0440468	0.0642623	0.948761	0.989455	no
Glyma01g22710	Glyma01g22710	Glyma01g22710	Gm01:28768432-28773021	14-13-0	14-13-7	OK	1.36435	1.19544	-0.190679	0.305582	0.759923	0.933419	no
Glyma01g22720	Glyma01g22720	Glyma01g22720	Gm01:28773705-28774862	14-13-0	14-13-7	NOTEST	0.113836	0	-1.79769e+308	-1.79769e+308	0.123372	1	no
Glyma01g22730	Glyma01g22730	Glyma01g22730	Gm01:28777549-28780388	14-13-0	14-13-7	NOTEST	0	0	0	0	1	1	no
Glyma01g22751	Glyma01g22751	Glyma01g22751	Gm01:28847126-28848359	14-13-0	14-13-7	NOTEST	0	0.0668181	1.79769e+308	1.79769e+308	0.113214	1	no
Glyma01g22770	Glyma01g22770	Glyma01g22770	Gm01:28902721-28902950	14-13-0	14-13-7	NOTEST	0	0	0	0	1	1	no
Glyma01g22800	Glyma01g22800	Glyma01g22800	Gm01:28928281-28929701	14-13-0	14-13-7	OK	0.10476	0.378086	1.85163	-1.75792	0.0787618	0.337747	no
Glyma01g22830	Glyma01g22830	Glyma01g22830	Gm01:28986402-28988037	14-13-0	14-13-7	OK	0.238809	0.759157	1.66854	-1.56916	0.11661	0.417793	no
Glyma01g22840	Glyma01g22840	Glyma01g22840	Gm01:28991061-29005174	14-13-0	14-13-7	NOTEST	0.0333422	0.0268027	-0.31497	0.191459	0.848166	1	no
Glyma01g22850	Glyma01g22850	Glyma01g22850	Gm01:29076299-29082231	14-13-0	14-13-7	NOTEST	0.0429005	0.0114407	-1.90681	0.996044	0.319229	1	no
Glyma01g22861	Glyma01g22861	Glyma01g22861	Gm01:29092183-29093676	14-13-0	14-13-7	NOTEST	0	0	0	0	1	1	no
Glyma01g22871	Glyma01g22871	Glyma01g22871	Gm01:29147726-29148607	14-13-0	14-13-7	OK	4.35859	3.5375	-0.301131	0.383239	0.701542	0.911807	no
Glyma01g22880	Glyma01g22880	Glyma01g22880	Gm01:29149880-29152191	14-13-0	14-13-7	NOTEST	0.158711	0.338696	1.09359	-1.08266	0.278959	1	no
Glyma01g22910	Glyma01g22910	Glyma01g22910	Gm01:29193663-29195557	14-13-0	14-13-7	NOTEST	0	0	0	0	1	1	no
Glyma01g22927	Glyma01g22927	Glyma01g22927	Gm01:29230774-29239997	14-13-0	14-13-7	NOTEST	0	0	0	0	1	1	no
Glyma01g22944	Glyma01g22944	Glyma01g22944	Gm01:29270621-29273823	14-13-0	14-13-7	NOTEST	0	0	0	0	1	1	no
Glyma01g22962	Glyma01g22962	Glyma01g22962	Gm01:29296975-29300243	14-13-0	14-13-7	NOTEST	0.00891384	0.00471773	-0.917953	0.252762	0.800452	1	no
Glyma01g22980	Glyma01g22980	Glyma01g22980	Gm01:29388012-29389406	14-13-0	14-13-7	NOTEST	0	0	0	0	1	1	no
Glyma01g22990	Glyma01g22990	Glyma01g22990	Gm01:29393119-29399932	14-13-0	14-13-7	NOTEST	0.110315	0.24029	1.12314	-1.17733	0.239063	1	no
Glyma01g23015	Glyma01g23015	Glyma01g23015	Gm01:29421939-29425642	14-13-0	14-13-7	OK	1.48135	1.30711	-0.180535	0.135768	0.892005	0.9767	no
Glyma01g23040	Glyma01g23040	Glyma01g23040	Gm01:29470009-29471440	14-13-0	14-13-7	OK	2.8771	5.02603	0.804806	-1.2794	0.200755	0.545664	no
Glyma01g23056	Glyma01g23056	Glyma01g23056	Gm01:29471833-29483149	14-13-0	14-13-7	OK	3.24587	4.30347	0.406897	-0.649299	0.516145	0.823526	no
Glyma01g23072	Glyma01g23072	Glyma01g23072	Gm01:29511789-29512084	14-13-0	14-13-7	NOTEST	0	0	0	0	1	1	no
Glyma01g23089	Glyma01g23089	Glyma01g23089	Gm01:29533330-29533964	14-13-0	14-13-7	NOTEST	0	0	0	0	1	1	no
Glyma01g23106	Glyma01g23106	Glyma01g23106	Gm01:29535512-29536834	14-13-0	14-13-7	NOTEST	0.181217	0.101165	-0.84101	0.401101	0.688346	1	no
Glyma01g23123	Glyma01g23123	Glyma01g23123	Gm01:29537254-29537802	14-13-0	14-13-7	NOTEST	0	0	0	0	1	1	no
Glyma01g23140	Glyma01g23140	Glyma01g23140	Gm01:29565892-29574413	14-13-0	14-13-7	OK	0.2809	0.510464	0.861753	-1.13804	0.255103	0.61324	no
Glyma01g23150	Glyma01g23150	Glyma01g23150	Gm01:29660957-29665158	14-13-0	14-13-7	OK	4.90407	3.39788	-0.529343	0.915821	0.359761	0.713026	no
Glyma01g23180	Glyma01g23180	Glyma01g23180	Gm01:29699064-29704324	14-13-0	14-13-7	OK	2.2907	3.41468	0.575962	-0.985491	0.324383	0.682357	no
Glyma01g23196	Glyma01g23196	Glyma01g23196	Gm01:29809758-29827788	14-13-0	14-13-7	OK	5.76493	3.73768	-0.625161	0.559768	0.575637	0.857841	no
Glyma01g23213	Glyma01g23213	Glyma01g23213	Gm01:29809758-29827788	14-13-0	14-13-7	OK	5.78433	5.70395	-0.0201894	0.028778	0.977042	0.996374	no
Glyma01g23230	Glyma01g23230	Glyma01g23230	Gm01:29843906-29847664	14-13-0	14-13-7	OK	4.48813	5.42344	0.273093	-0.473461	0.635884	0.885784	no
Glyma01g23250	Glyma01g23250	Glyma01g23250	Gm01:29855703-29857266	14-13-0	14-13-7	NOTEST	0	0	0	0	1	1	no
Glyma01g23300	Glyma01g23300	Glyma01g23300	Gm01:29947728-29948872	14-13-0	14-13-7	NOTEST	0	0	0	0	1	1	no
Glyma01g23342	Glyma01g23342	Glyma01g23342	Gm01:29989093-29991297	14-13-0	14-13-7	NOTEST	0	0	0	0	1	1	no
Glyma01g23384	Glyma01g23384	Glyma01g23384	Gm01:30079377-30079787	14-13-0	14-13-7	OK	0	0.800088	1.79769e+308	1.79769e+308	0.0692411	0.314838	no
Glyma01g23427	Glyma01g23427	Glyma01g23427	Gm01:30083471-30150322	14-13-0	14-13-7	OK	1.96713	2.5073	0.350043	-0.593288	0.552989	0.84441	no
Glyma01g23470	Glyma01g23470	Glyma01g23470	Gm01:30208373-30208835	14-13-0	14-13-7	NOTEST	0	0	0	0	1	1	no
Glyma01g23534	Glyma01g23534	Glyma01g23534	Gm01:30275109-30281645	14-13-0	14-13-7	NOTEST	0	0	0	0	1	1	no
Glyma01g23598	Glyma01g23598	Glyma01g23598	Gm01:30314496-30324821	14-13-0	14-13-7	OK	9.79886	7.3971	-0.405655	0.619467	0.535609	0.835248	no
Glyma01g23662	Glyma01g23662	Glyma01g23662	Gm01:30575165-30577235	14-13-0	14-13-7	NOTEST	0	0	0	0	1	1	no
Glyma01g23726	Glyma01g23726	Glyma01g23726	Gm01:30704826-30710568	14-13-0	14-13-7	OK	6.35531	5.7756	-0.137992	0.240827	0.809689	0.952713	no
Glyma01g23790	Glyma01g23790	Glyma01g23790	Gm01:30725259-30734274	14-13-0	14-13-7	NOTEST	0	0	0	0	1	1	no
Glyma01g23820	Glyma01g23820	Glyma01g23820	Gm01:30803138-30810796	14-13-0	14-13-7	OK	3.56165	2.63144	-0.436691	0.603848	0.545945	0.840727	no
Glyma01g23830	Glyma01g23830	Glyma01g23830	Gm01:30834278-30837915	14-13-0	14-13-7	OK	4.85777	4.65734	-0.0607871	0.102777	0.91814	0.982912	no
Glyma01g23840	Glyma01g23840	Glyma01g23840	Gm01:30921784-30923363	14-13-0	14-13-7	NOTEST	0	0	0	0	1	1	no
Glyma01g23870	Glyma01g23870	Glyma01g23870	Gm01:31003666-31006666	14-13-0	14-13-7	OK	17.9205	3.77664	-2.24644	3.65118	0.000261043	0.00960499	yes
Glyma01g24100	Glyma01g24100	Glyma01g24100	Gm01:31272679-31276347	14-13-0	14-13-7	OK	83.1419	31.7326	-1.38961	2.17675	0.0294989	0.19606	no
Glyma01g24115	Glyma01g24115	Glyma01g24115	Gm01:31363012-31365202	14-13-0	14-13-7	NOTEST	0	0	0	0	1	1	no
Glyma01g24130	Glyma01g24130	Glyma01g24130	Gm01:31382751-31384508	14-13-0	14-13-7	NOTEST	0	0	0	0	1	1	no
Glyma01g24136	Glyma01g24136	Glyma01g24136	Gm01:31384592-31388267	14-13-0	14-13-7	NOTEST	0	0	0	0	1	1	no
Glyma01g24143	Glyma01g24143	Glyma01g24143	Gm01:31403714-31405886	14-13-0	14-13-7	NOTEST	0	0	0	0	1	1	no
Glyma01g24150	Glyma01g24150	Glyma01g24150	Gm01:31406290-31410211	14-13-0	14-13-7	OK	0.919669	1.59883	0.797829	-0.901702	0.367215	0.719046	no
Glyma01g24160	Glyma01g24160	Glyma01g24160	Gm01:31442860-31443621	14-13-0	14-13-7	NOTEST	0.116635	0.0595535	-0.96974	0.462495	0.643726	1	no
Glyma01g24360	Glyma01g24360	Glyma01g24360	Gm01:31583729-31587255	14-13-0	14-13-7	OK	18.115	7.34898	-1.30157	2.22873	0.0258321	0.181556	no
Glyma01g24383	Glyma01g24383	Glyma01g24383	Gm01:31655035-31655556	14-13-0	14-13-7	NOTEST	0	0	0	0	1	1	no
Glyma01g24406	Glyma01g24406	Glyma01g24406	Gm01:31704492-31706592	14-13-0	14-13-7	NOTEST	0	0	0	0	1	1	no
Glyma01g24430	Glyma01g24430	Glyma01g24430	Gm01:31720084-31726752	14-13-0	14-13-7	OK	2.26211	3.29293	0.541702	-0.83502	0.403706	0.749408	no
Glyma01g24455	Glyma01g24455	Glyma01g24455	Gm01:31734753-31736467	14-13-0	14-13-7	OK	0.453938	0.0232694	-4.28599	2.36801	0.0178843	0.146467	no
Glyma01g24480	Glyma01g24480	Glyma01g24480	Gm01:31792540-31792932	14-13-0	14-13-7	OK	6.91112	3.623	-0.931734	1.14395	0.252643	0.611002	no
Glyma01g24495	Glyma01g24495	Glyma01g24495	Gm01:31795450-31795885	14-13-0	14-13-7	NOTEST	0	0.208395	1.79769e+308	1.79769e+308	0.196186	1	no
Glyma01g24510	Glyma01g24510	Glyma01g24510	Gm01:31818673-31828608	14-13-0	14-13-7	OK	2.83195	2.53294	-0.16098	0.273042	0.784821	0.942878	no
Glyma01g24515	Glyma01g24515	Glyma01g24515	Gm01:31889614-31891603	14-13-0	14-13-7	NOTEST	0	0	0	0	1	1	no
Glyma01g24520	Glyma01g24520	Glyma01g24520	Gm01:31911765-31920749	14-13-0	14-13-7	OK	3.88302	4.19741	0.11232	-0.161175	0.871956	0.971327	no
Glyma01g24530	Glyma01g24530	Glyma01g24530	Gm01:31964428-31977723	14-13-0	14-13-7	NOTEST	0.3413	0.288802	-0.240959	0.266798	0.789625	1	no
Glyma01g24536	Glyma01g24536	Glyma01g24536	Gm01:31981604-31985794	14-13-0	14-13-7	NOTEST	0	0	0	0	1	1	no
Glyma01g24543	Glyma01g24543	Glyma01g24543	Gm01:32028704-32031074	14-13-0	14-13-7	NOTEST	0	0	0	0	1	1	no
Glyma01g24550	Glyma01g24550	Glyma01g24550	Gm01:32033425-32036205	14-13-0	14-13-7	OK	3.41419	2.89897	-0.236002	0.301101	0.763338	0.934453	no
Glyma01g24570	Glyma01g24570	Glyma01g24570	Gm01:32066869-32072424	14-13-0	14-13-7	OK	7.53733	6.04377	-0.318605	0.525036	0.599558	0.869908	no
Glyma01g24580	Glyma01g24580	Glyma01g24580	Gm01:32077414-32078744	14-13-0	14-13-7	NOTEST	0	0	0	0	1	1	no
Glyma01g24601	Glyma01g24601	Glyma01g24601	Gm01:32084232-32086938	14-13-0	14-13-7	OK	8.15175	4.14065	-0.977252	1.1779	0.238837	0.595914	no
Glyma01g24620	Glyma01g24620	Glyma01g24620	Gm01:32161499-32162094	14-13-0	14-13-7	NOTEST	0	0	0	0	1	1	no
Glyma01g24650	Glyma01g24650	Glyma01g24650	Gm01:32202535-32211787	14-13-0	14-13-7	OK	9.7316	4.49883	-1.11313	1.90377	0.0569398	0.281868	no
Glyma01g24670	Glyma01g24670	Glyma01g24670	Gm01:32220914-32223882	14-13-0	14-13-7	OK	0.289577	0.478911	0.725809	-0.882929	0.377275	0.727462	no
Glyma01g24680	Glyma01g24680	Glyma01g24680	Gm01:32231085-32231557	14-13-0	14-13-7	NOTEST	0	0	0	0	1	1	no
Glyma01g24710	Glyma01g24710	Glyma01g24710	Gm01:32287633-32289710	14-13-0	14-13-7	NOTEST	0	0.168291	1.79769e+308	1.79769e+308	0.0212374	1	no
Glyma01g24715	Glyma01g24715	Glyma01g24715	Gm01:32301822-32302361	14-13-0	14-13-7	NOTEST	0	0	0	0	1	1	no
Glyma01g24720	Glyma01g24720	Glyma01g24720	Gm01:32308210-32311363	14-13-0	14-13-7	NOTEST	0	0	0	0	1	1	no
Glyma01g24735	Glyma01g24735	Glyma01g24735	Gm01:32401120-32402034	14-13-0	14-13-7	NOTEST	0	0	0	0	1	1	no
Glyma01g24750	Glyma01g24750	Glyma01g24750	Gm01:32402350-32403396	14-13-0	14-13-7	NOTEST	0	0	0	0	1	1	no
Glyma01g24771	Glyma01g24771	Glyma01g24771	Gm01:32417415-32418160	14-13-0	14-13-7	NOTEST	0	0	0	0	1	1	no
Glyma01g24790	Glyma01g24790	Glyma01g24790	Gm01:32422309-32422465	14-13-0	14-13-7	NOTEST	0	0	0	0	1	1	no
Glyma01g24801	Glyma01g24801	Glyma01g24801	Gm01:32490914-32491358	14-13-0	14-13-7	NOTEST	0	0	0	0	1	1	no
Glyma01g24811	Glyma01g24811	Glyma01g24811	Gm01:32561178-32561613	14-13-0	14-13-7	NOTEST	0	0	0	0	1	1	no
Glyma01g24820	Glyma01g24820	Glyma01g24820	Gm01:32606517-32608233	14-13-0	14-13-7	NOTEST	0	0	0	0	1	1	no
Glyma01g24835	Glyma01g24835	Glyma01g24835	Gm01:32612017-32613710	14-13-0	14-13-7	NOTEST	0	0	0	0	1	1	no
Glyma01g24850	Glyma01g24850	Glyma01g24850	Gm01:32687318-32692418	14-13-0	14-13-7	NOTEST	0	0	0	0	1	1	no
Glyma01g24870	Glyma01g24870	Glyma01g24870	Gm01:32782513-32787123	14-13-0	14-13-7	NOTEST	0.0914469	0.0811086	-0.173079	0.145634	0.88421	1	no
Glyma01g24880	Glyma01g24880	Glyma01g24880	Gm01:32798562-32800071	14-13-0	14-13-7	OK	3.69239	4.882	0.402918	-0.639042	0.522796	0.826896	no
Glyma01g24900	Glyma01g24900	Glyma01g24900	Gm01:32814004-32817943	14-13-0	14-13-7	OK	4.91804	5.28335	0.103368	-0.168158	0.866459	0.969601	no
Glyma01g24915	Glyma01g24915	Glyma01g24915	Gm01:32834808-32836555	14-13-0	14-13-7	NOTEST	0	0.0777766	1.79769e+308	1.79769e+308	0.113214	1	no
Glyma01g24931	Glyma01g24931	Glyma01g24931	Gm01:32867175-32870537	14-13-0	14-13-7	OK	43.7419	27.0894	-0.691288	1.07549	0.282155	0.642489	no
Glyma01g24945	Glyma01g24945	Glyma01g24945	Gm01:32870727-32871773	14-13-0	14-13-7	OK	7.43204	8.9207	0.263399	-0.42691	0.669445	0.899744	no
Glyma01g24960	Glyma01g24960	Glyma01g24960	Gm01:32900893-32902163	14-13-0	14-13-7	NOTEST	0	0	0	0	1	1	no
Glyma01g24975	Glyma01g24975	Glyma01g24975	Gm01:33011689-33012355	14-13-0	14-13-7	NOTEST	0	0.218668	1.79769e+308	1.79769e+308	0.196186	1	no
Glyma01g24990	Glyma01g24990	Glyma01g24990	Gm01:33023697-33026836	14-13-0	14-13-7	NOTEST	0	0	0	0	1	1	no
Glyma01g25000	Glyma01g25000	Glyma01g25000	Gm01:33038313-33043683	14-13-0	14-13-7	NOTEST	0	0.223375	1.79769e+308	1.79769e+308	0.0286704	1	no
Glyma01g25010	Glyma01g25010	Glyma01g25010	Gm01:33122056-33128090	14-13-0	14-13-7	OK	1.16408	1.30728	0.167377	-0.220754	0.825284	0.958275	no
Glyma01g25040	Glyma01g25040	Glyma01g25040	Gm01:33159095-33163007	14-13-0	14-13-7	OK	5.48295	3.71366	-0.562111	0.963158	0.335468	0.692048	no
Glyma01g25116	Glyma01g25116	Glyma01g25116	Gm01:33175920-33176216	14-13-0	14-13-7	NOTEST	0	0	0	0	1	1	no
Glyma01g25193	Glyma01g25193	Glyma01g25193	Gm01:33176938-33177664	14-13-0	14-13-7	NOTEST	0	0	0	0	1	1	no
Glyma01g25270	Glyma01g25270	Glyma01g25270	Gm01:33300641-33305517	14-13-0	14-13-7	OK	8.84146	4.41764	-1.00101	1.62202	0.1048	0.395694	no
Glyma01g25690	Glyma01g25690	Glyma01g25690	Gm01:33714521-33724227	14-13-0	14-13-7	OK	3.99321	3.50431	-0.188421	0.322674	0.746942	0.92737	no
Glyma01g25710	Glyma01g25710	Glyma01g25710	Gm01:33743092-33750073	14-13-0	14-13-7	OK	0.863208	1.95897	1.18231	-1.7764	0.0756677	0.331203	no
Glyma01g25734	Glyma01g25734	Glyma01g25734	Gm01:33873561-33877219	14-13-0	14-13-7	NOTEST	0	0	0	0	1	1	no
Glyma01g25758	Glyma01g25758	Glyma01g25758	Gm01:33877681-33878910	14-13-0	14-13-7	NOTEST	0	0	0	0	1	1	no
Glyma01g25782	Glyma01g25782	Glyma01g25782	Gm01:33892028-33896774	14-13-0	14-13-7	NOTEST	0.0370746	0.118999	1.68245	-1.30015	0.193549	1	no
Glyma01g25806	Glyma01g25806	Glyma01g25806	Gm01:33911123-33912252	14-13-0	14-13-7	NOTEST	0	0	0	0	1	1	no
Glyma01g25830	Glyma01g25830	Glyma01g25830	Gm01:33967102-33969353	14-13-0	14-13-7	OK	22.5069	22.3486	-0.0101867	0.0157575	0.987428	0.997416	no
Glyma01g25861	Glyma01g25861	Glyma01g25861	Gm01:33970039-33970770	14-13-0	14-13-7	NOTEST	0	0.259977	1.79769e+308	1.79769e+308	0.113214	1	no
Glyma01g25890	Glyma01g25890	Glyma01g25890	Gm01:34032831-34039400	14-13-0	14-13-7	OK	7.01516	8.61509	0.29639	-0.516819	0.605283	0.871585	no
Glyma01g25903	Glyma01g25903	Glyma01g25903	Gm01:34110636-34112307	14-13-0	14-13-7	NOTEST	0	0	0	0	1	1	no
Glyma01g25916	Glyma01g25916	Glyma01g25916	Gm01:34210140-34210872	14-13-0	14-13-7	NOTEST	0	0	0	0	1	1	no
Glyma01g25930	Glyma01g25930	Glyma01g25930	Gm01:34244964-34245805	14-13-0	14-13-7	NOTEST	0	0.182063	1.79769e+308	1.79769e+308	0.0692411	1	no
Glyma01g25940	Glyma01g25940	Glyma01g25940	Gm01:34287073-34295334	14-13-0	14-13-7	OK	34.2549	18.0439	-0.924803	1.41296	0.157668	0.486959	no
Glyma01g25960	Glyma01g25960	Glyma01g25960	Gm01:34329634-34332496	14-13-0	14-13-7	OK	0.0859707	0.657079	2.93415	-1.67657	0.0936262	0.371991	no
Glyma01g25980	Glyma01g25980	Glyma01g25980	Gm01:34344570-34345856	14-13-0	14-13-7	NOTEST	0	0	0	0	1	1	no
Glyma01g26010	Glyma01g26010	Glyma01g26010	Gm01:34353206-34357427	14-13-0	14-13-7	NOTEST	0	0	0	0	1	1	no
Glyma01g26220	Glyma01g26220	Glyma01g26220	Gm01:34484074-34486309	14-13-0	14-13-7	OK	1.72259	1.72099	-0.00134001	0.00186506	0.998512	0.999446	no
Glyma01g26230	Glyma01g26230	Glyma01g26230	Gm01:34508385-34510490	14-13-0	14-13-7	OK	11.9905	8.20358	-0.547563	0.950428	0.341895	0.698068	no
Glyma01g26300	Glyma01g26300	Glyma01g26300	Gm01:34545482-34547230	14-13-0	14-13-7	OK	5.56348	8.64315	0.635569	-1.04796	0.294656	0.654326	no
Glyma01g26310	Glyma01g26310	Glyma01g26310	Gm01:34591834-34592752	14-13-0	14-13-7	NOTEST	0	0	0	0	1	1	no
Glyma01g26325	Glyma01g26325	Glyma01g26325	Gm01:34678298-34679472	14-13-0	14-13-7	NOTEST	0	0	0	0	1	1	no
Glyma01g26340	Glyma01g26340	Glyma01g26340	Gm01:34729733-34732217	14-13-0	14-13-7	NOTEST	0.207386	0.244345	0.236602	-0.241851	0.808896	1	no
Glyma01g26350	Glyma01g26350	Glyma01g26350	Gm01:34828578-34838846	14-13-0	14-13-7	OK	4.56109	2.97579	-0.616109	1.06814	0.285456	0.645264	no
Glyma01g26360	Glyma01g26360	Glyma01g26360	Gm01:34923320-34923989	14-13-0	14-13-7	OK	7.35307	11.8835	0.692541	-1.08895	0.276176	0.636393	no
Glyma01g26570	Glyma01g26570	Glyma01g26570	Gm01:35047812-35050350	14-13-0	14-13-7	NOTEST	0.0537397	0.0870646	0.696098	-0.440277	0.659736	1	no
Glyma01g26580	Glyma01g26580	Glyma01g26580	Gm01:35128362-35132942	14-13-0	14-13-7	NOTEST	0	0.0729891	1.79769e+308	1.79769e+308	0.113214	1	no
Glyma01g26590	Glyma01g26590	Glyma01g26590	Gm01:35185581-35190582	14-13-0	14-13-7	NOTEST	0.0291972	0.243262	3.05861	-2.82198	0.00477279	1	no
Glyma01g26600	Glyma01g26600	Glyma01g26600	Gm01:35191726-35193878	14-13-0	14-13-7	OK	4.67496	3.7408	-0.321605	0.490903	0.623495	0.879167	no
Glyma01g26606	Glyma01g26606	Glyma01g26606	Gm01:35221753-35222332	14-13-0	14-13-7	NOTEST	0	0	0	0	1	1	no
Glyma01g26613	Glyma01g26613	Glyma01g26613	Gm01:35260947-35261763	14-13-0	14-13-7	NOTEST	0	0	0	0	1	1	no
Glyma01g26620	Glyma01g26620	Glyma01g26620	Gm01:35271480-35272153	14-13-0	14-13-7	NOTEST	0	0	0	0	1	1	no
Glyma01g26650	Glyma01g26650	Glyma01g26650	Gm01:35317654-35328670	14-13-0	14-13-7	OK	2.32386	1.60991	-0.529544	0.780434	0.435135	0.773163	no
Glyma01g26670	Glyma01g26670	Glyma01g26670	Gm01:35431736-35435954	14-13-0	14-13-7	OK	0.311722	0.962898	1.62712	-1.8045	0.0711533	0.319155	no
Glyma01g26681	Glyma01g26681	Glyma01g26681	Gm01:35464370-35465052	14-13-0	14-13-7	NOTEST	0	0	0	0	1	1	no
Glyma01g26690	Glyma01g26690	Glyma01g26690	Gm01:35468032-35472931	14-13-0	14-13-7	OK	0.0932918	0.748503	3.00419	-2.7667	0.00566263	0.0759109	no
Glyma01g26700	Glyma01g26700	Glyma01g26700	Gm01:35501543-35506434	14-13-0	14-13-7	OK	1.26211	2.16743	0.780152	-1.13953	0.25448	0.612553	no
Glyma01g26750	Glyma01g26750	Glyma01g26750	Gm01:35572394-35581615	14-13-0	14-13-7	NOTEST	0.217135	0	-1.79769e+308	-1.79769e+308	0.0534792	1	no
Glyma01g26766	Glyma01g26766	Glyma01g26766	Gm01:35587717-35588464	14-13-0	14-13-7	NOTEST	0	0	0	0	1	1	no
Glyma01g26783	Glyma01g26783	Glyma01g26783	Gm01:35595556-35596652	14-13-0	14-13-7	NOTEST	0	0	0	0	1	1	no
Glyma01g26800	Glyma01g26800	Glyma01g26800	Gm01:35606472-35610217	14-13-0	14-13-7	NOTEST	0	0	0	0	1	1	no
Glyma01g26813	Glyma01g26813	Glyma01g26813	Gm01:35625153-35625890	14-13-0	14-13-7	NOTEST	0	0	0	0	1	1	no
Glyma01g26826	Glyma01g26826	Glyma01g26826	Gm01:35632686-35633208	14-13-0	14-13-7	NOTEST	0	0	0	0	1	1	no
Glyma01g26840	Glyma01g26840	Glyma01g26840	Gm01:35643767-35646603	14-13-0	14-13-7	OK	4.68129	4.86239	0.0547607	-0.0875221	0.930256	0.986085	no
Glyma01g26860	Glyma01g26860	Glyma01g26860	Gm01:35688241-35692239	14-13-0	14-13-7	NOTEST	0	0	0	0	1	1	no
Glyma01g26900	Glyma01g26900	Glyma01g26900	Gm01:35719443-35723183	14-13-0	14-13-7	NOTEST	0	0	0	0	1	1	no
Glyma01g26915	Glyma01g26915	Glyma01g26915	Gm01:35827768-35828303	14-13-0	14-13-7	NOTEST	0	0	0	0	1	1	no
Glyma01g26930	Glyma01g26930	Glyma01g26930	Gm01:35832934-35837033	14-13-0	14-13-7	OK	48.368	17.0707	-1.50253	1.99356	0.0461998	0.25191	no
Glyma01g26940	Glyma01g26940	Glyma01g26940	Gm01:35863797-35865409	14-13-0	14-13-7	OK	2.08736	3.06457	0.554005	-0.842654	0.399422	0.745434	no
Glyma01g26950	Glyma01g26950	Glyma01g26950	Gm01:35866292-35869400	14-13-0	14-13-7	OK	51.4926	30.1761	-0.770961	1.12368	0.261149	0.620317	no
Glyma01g26961	Glyma01g26961	Glyma01g26961	Gm01:35952581-35954091	14-13-0	14-13-7	NOTEST	0	0	0	0	1	1	no
Glyma01g26970	Glyma01g26970	Glyma01g26970	Gm01:35963018-35964248	14-13-0	14-13-7	OK	76.2074	9.4676	-3.00886	4.73265	2.21612e-06	0.000231034	yes
Glyma01g26981	Glyma01g26981	Glyma01g26981	Gm01:35964318-35966630	14-13-0	14-13-7	OK	1.84927	2.08962	0.176288	-0.193118	0.846867	0.964655	no
Glyma01g26990	Glyma01g26990	Glyma01g26990	Gm01:35968043-35972769	14-13-0	14-13-7	OK	16.4191	4.46713	-1.87795	3.13809	0.00170054	0.0352572	yes
Glyma01g27005	Glyma01g27005	Glyma01g27005	Gm01:35977333-35983210	14-13-0	14-13-7	OK	2.86386	0.992119	-1.52937	2.42951	0.0151191	0.133674	no
Glyma01g27020	Glyma01g27020	Glyma01g27020	Gm01:36004326-36005428	14-13-0	14-13-7	NOTEST	0.0397849	0.0108052	-1.88049	0.494134	0.621212	1	no
Glyma01g27040	Glyma01g27040	Glyma01g27040	Gm01:36021672-36025699	14-13-0	14-13-7	OK	0	0.630433	1.79769e+308	1.79769e+308	0.00523418	0.0720015	no
Glyma01g27060	Glyma01g27060	Glyma01g27060	Gm01:36063450-36065354	14-13-0	14-13-7	OK	2.93967	3.22754	0.134779	-0.213248	0.831133	0.960463	no
Glyma01g27110	Glyma01g27110	Glyma01g27110	Gm01:36127733-36131641	14-13-0	14-13-7	NOTEST	0	0	0	0	1	1	no
Glyma01g27120	Glyma01g27120	Glyma01g27120	Gm01:36147154-36151735	14-13-0	14-13-7	OK	5.9214	1.35672	-2.12581	3.11623	0.00183179	0.0369627	yes
Glyma01g27130	Glyma01g27130	Glyma01g27130	Gm01:36161870-36165133	14-13-0	14-13-7	OK	0.397942	0.576777	0.535454	-0.586927	0.557253	0.846701	no
Glyma01g27145	Glyma01g27145	Glyma01g27145	Gm01:36192774-36194659	14-13-0	14-13-7	NOTEST	0	0	0	0	1	1	no
Glyma01g27160	Glyma01g27160	Glyma01g27160	Gm01:36195997-36196273	14-13-0	14-13-7	NOTEST	0	0	0	0	1	1	no
Glyma01g27170	Glyma01g27170	Glyma01g27170	Gm01:36211478-36213198	14-13-0	14-13-7	OK	1.42537	1.67221	0.230415	-0.228896	0.81895	0.955984	no
Glyma01g27200	Glyma01g27200	Glyma01g27200	Gm01:36246044-36251145	14-13-0	14-13-7	OK	10.367	5.9946	-0.79027	1.3697	0.17078	0.507913	no
Glyma01g27215	Glyma01g27215	Glyma01g27215	Gm01:36263859-36271059	14-13-0	14-13-7	NOTEST	0.33276	0.126366	-1.39687	0.709221	0.478187	1	no
Glyma01g27230	Glyma01g27230	Glyma01g27230	Gm01:36326563-36327062	14-13-0	14-13-7	NOTEST	0	0	0	0	1	1	no
Glyma01g27240	Glyma01g27240	Glyma01g27240	Gm01:36332421-36351694	14-13-0	14-13-7	OK	5.10567	5.8009	0.184177	-0.312855	0.754391	0.930519	no
Glyma01g27250	Glyma01g27250	Glyma01g27250	Gm01:36369066-36382267	14-13-0	14-13-7	OK	9.01051	7.31454	-0.30084	0.502377	0.615403	0.876039	no
Glyma01g27260	Glyma01g27260	Glyma01g27260	Gm01:36388728-36391729	14-13-0	14-13-7	NOTEST	0	0	0	0	1	1	no
Glyma01g27280	Glyma01g27280	Glyma01g27280	Gm01:36438459-36440199	14-13-0	14-13-7	OK	0.710091	0.851873	0.262634	-0.314338	0.753264	0.929856	no
Glyma01g27291	Glyma01g27291	Glyma01g27291	Gm01:36450899-36454001	14-13-0	14-13-7	OK	0.584874	0.614451	0.0711716	-0.0618636	0.950671	0.989737	no
Glyma01g27301	Glyma01g27301	Glyma01g27301	Gm01:36450899-36454001	14-13-0	14-13-7	NOTEST	0	0.0853388	1.79769e+308	1.79769e+308	0.302471	1	no
Glyma01g27310	Glyma01g27310	Glyma01g27310	Gm01:36464465-36465566	14-13-0	14-13-7	NOTEST	0	0	0	0	1	1	no
Glyma01g27360	Glyma01g27360	Glyma01g27360	Gm01:36545021-36547291	14-13-0	14-13-7	NOTEST	0.0579382	0.116143	1.00331	-0.910123	0.362758	1	no
Glyma01g27385	Glyma01g27385	Glyma01g27385	Gm01:36610052-36610460	14-13-0	14-13-7	NOTEST	0	0	0	0	1	1	no
Glyma01g27410	Glyma01g27410	Glyma01g27410	Gm01:36654803-36655111	14-13-0	14-13-7	NOTEST	0	0	0	0	1	1	no
Glyma01g27440	Glyma01g27440	Glyma01g27440	Gm01:36685735-36695527	14-13-0	14-13-7	NOTEST	0	0.051359	1.79769e+308	1.79769e+308	0.0595837	1	no
Glyma01g27455	Glyma01g27455	Glyma01g27455	Gm01:36705021-36712560	14-13-0	14-13-7	NOTEST	0.220007	0.236285	0.102976	-0.121961	0.90293	1	no
Glyma01g27470	Glyma01g27470	Glyma01g27470	Gm01:36735448-36737186	14-13-0	14-13-7	NOTEST	0	0.0805276	1.79769e+308	1.79769e+308	0.0523416	1	no
Glyma01g27490	Glyma01g27490	Glyma01g27490	Gm01:36794254-36798874	14-13-0	14-13-7	NOTEST	0	0.0165204	1.79769e+308	1.79769e+308	0.293508	1	no
Glyma01g27710	Glyma01g27710	Glyma01g27710	Gm01:36987889-36992462	14-13-0	14-13-7	OK	2.24897	5.10753	1.18336	-1.98405	0.04725	0.254829	no
Glyma01g27720	Glyma01g27720	Glyma01g27720	Gm01:37036140-37038376	14-13-0	14-13-7	OK	0.192214	1.24304	2.69309	-2.93999	0.00328227	0.0539752	no
Glyma01g27765	Glyma01g27765	Glyma01g27765	Gm01:37212445-37213145	14-13-0	14-13-7	NOTEST	0	0	0	0	1	1	no
Glyma01g27810	Glyma01g27810	Glyma01g27810	Gm01:37231576-37233997	14-13-0	14-13-7	OK	7.53357	11.7743	0.64424	-1.08696	0.277056	0.637404	no
Glyma01g27840	Glyma01g27840	Glyma01g27840	Gm01:37299487-37305059	14-13-0	14-13-7	OK	16.4004	19.4155	0.243481	-0.389242	0.697097	0.910657	no
Glyma01g27860	Glyma01g27860	Glyma01g27860	Gm01:37321469-37321784	14-13-0	14-13-7	NOTEST	0	0	0	0	1	1	no
Glyma01g27890	Glyma01g27890	Glyma01g27890	Gm01:37336991-37338203	14-13-0	14-13-7	OK	0.672734	1.13705	0.757189	-0.85642	0.391766	0.740004	no
Glyma01g27900	Glyma01g27900	Glyma01g27900	Gm01:37379998-37383931	14-13-0	14-13-7	OK	12.1071	23.3572	0.948015	-1.52767	0.126595	0.434146	no
Glyma01g27910	Glyma01g27910	Glyma01g27910	Gm01:37406845-37408224	14-13-0	14-13-7	NOTEST	0	0	0	0	1	1	no
Glyma01g27941	Glyma01g27941	Glyma01g27941	Gm01:37433263-37434146	14-13-0	14-13-7	NOTEST	0	0	0	0	1	1	no
Glyma01g27970	Glyma01g27970	Glyma01g27970	Gm01:37457417-37460795	14-13-0	14-13-7	NOTEST	0	0	0	0	1	1	no
Glyma01g28026	Glyma01g28026	Glyma01g28026	Gm01:37580338-37581229	14-13-0	14-13-7	NOTEST	0	0	0	0	1	1	no
Glyma01g28082	Glyma01g28082	Glyma01g28082	Gm01:37587054-37587942	14-13-0	14-13-7	NOTEST	0	0	0	0	1	1	no
Glyma01g28139	Glyma01g28139	Glyma01g28139	Gm01:37594369-37595242	14-13-0	14-13-7	NOTEST	0	0	0	0	1	1	no
Glyma01g28196	Glyma01g28196	Glyma01g28196	Gm01:37611247-37612183	14-13-0	14-13-7	NOTEST	0	0	0	0	1	1	no
Glyma01g28253	Glyma01g28253	Glyma01g28253	Gm01:37911350-37912244	14-13-0	14-13-7	NOTEST	0	0	0	0	1	1	no
Glyma01g28310	Glyma01g28310	Glyma01g28310	Gm01:37913283-37917411	14-13-0	14-13-7	OK	2.03535	6.86871	1.75477	-2.70381	0.00685493	0.0847649	no
Glyma01g28353	Glyma01g28353	Glyma01g28353	Gm01:38060909-38061301	14-13-0	14-13-7	OK	0.379744	0	-1.79769e+308	-1.79769e+308	0.123372	0.428546	no
Glyma01g28396	Glyma01g28396	Glyma01g28396	Gm01:38199627-38200321	14-13-0	14-13-7	OK	378.765	77.7097	-2.28514	3.49838	0.000468085	0.0143951	yes
Glyma01g28440	Glyma01g28440	Glyma01g28440	Gm01:38205261-38207629	14-13-0	14-13-7	OK	0.524575	3.80283	2.85785	-4.02925	5.5956e-05	0.00293313	yes
Glyma01g28460	Glyma01g28460	Glyma01g28460	Gm01:38222786-38224222	14-13-0	14-13-7	NOTEST	0	0	0	0	1	1	no
Glyma01g28480	Glyma01g28480	Glyma01g28480	Gm01:38248791-38250401	14-13-0	14-13-7	NOTEST	0	0	0	0	1	1	no
Glyma01g28491	Glyma01g28491	Glyma01g28491	Gm01:38259681-38270227	14-13-0	14-13-7	NOTEST	0	0	0	0	1	1	no
Glyma01g28500	Glyma01g28500	Glyma01g28500	Gm01:38308110-38309077	14-13-0	14-13-7	OK	92.9912	45.3227	-1.03686	1.63509	0.102031	0.389334	no
Glyma01g28511	Glyma01g28511	Glyma01g28511	Gm01:38309608-38311167	14-13-0	14-13-7	NOTEST	0	0	0	0	1	1	no
Glyma01g28520	Glyma01g28520	Glyma01g28520	Gm01:38386523-38391051	14-13-0	14-13-7	OK	7.32819	3.84651	-0.929907	1.35383	0.175791	0.515427	no
Glyma01g28550	Glyma01g28550	Glyma01g28550	Gm01:38422858-38424428	14-13-0	14-13-7	NOTEST	0	0	0	0	1	1	no
Glyma01g28626	Glyma01g28626	Glyma01g28626	Gm01:38529390-38530425	14-13-0	14-13-7	NOTEST	0	0	0	0	1	1	no
Glyma01g28703	Glyma01g28703	Glyma01g28703	Gm01:38575000-38577422	14-13-0	14-13-7	OK	0.176355	4.48364	4.66811	-4.49017	7.11669e-06	0.000579853	yes
Glyma01g28780	Glyma01g28780	Glyma01g28780	Gm01:38596171-38598279	14-13-0	14-13-7	OK	0	0.537081	1.79769e+308	1.79769e+308	0.00663834	0.0832114	no
Glyma01g28800	Glyma01g28800	Glyma01g28800	Gm01:38660680-38662575	14-13-0	14-13-7	NOTEST	0	0.0179635	1.79769e+308	1.79769e+308	0.196186	1	no
Glyma01g28805	Glyma01g28805	Glyma01g28805	Gm01:38690273-38690984	14-13-0	14-13-7	NOTEST	0	0	0	0	1	1	no
Glyma01g28810	Glyma01g28810	Glyma01g28810	Gm01:38692764-38695649	14-13-0	14-13-7	OK	1644.91	2115.55	0.363029	-0.308016	0.75807	0.932559	no
Glyma01g28820	Glyma01g28820	Glyma01g28820	Gm01:38703774-38707276	14-13-0	14-13-7	OK	52.7901	44.8602	-0.234833	0.279721	0.779692	0.941103	no
Glyma01g28830	Glyma01g28830	Glyma01g28830	Gm01:38709310-38713735	14-13-0	14-13-7	OK	18.0735	6.01596	-1.58701	2.69649	0.00700747	0.0855659	no
Glyma01g28841	Glyma01g28841	Glyma01g28841	Gm01:38749817-38751606	14-13-0	14-13-7	NOTEST	0	0	0	0	1	1	no
Glyma01g28850	Glyma01g28850	Glyma01g28850	Gm01:38758937-38772979	14-13-0	14-13-7	NOTEST	0	0.0189698	1.79769e+308	1.79769e+308	0.196186	1	no
Glyma01g28865	Glyma01g28865	Glyma01g28865	Gm01:38774846-38778332	14-13-0	14-13-7	NOTEST	0.211701	0.364006	0.781933	-0.775966	0.437769	1	no
Glyma01g28880	Glyma01g28880	Glyma01g28880	Gm01:38811474-38819368	14-13-0	14-13-7	NOTEST	0	0	0	0	1	1	no
Glyma01g28890	Glyma01g28890	Glyma01g28890	Gm01:38825959-38830479	14-13-0	14-13-7	NOTEST	0	0	0	0	1	1	no
Glyma01g28936	Glyma01g28936	Glyma01g28936	Gm01:38986023-38989868	14-13-0	14-13-7	OK	1.27267	0.489658	-1.37801	1.94491	0.051786	0.268844	no
Glyma01g28983	Glyma01g28983	Glyma01g28983	Gm01:39101552-39101978	14-13-0	14-13-7	NOTEST	0	0	0	0	1	1	no
Glyma01g29030	Glyma01g29030	Glyma01g29030	Gm01:39117816-39121119	14-13-0	14-13-7	NOTEST	0.194857	0.118717	-0.714893	0.721841	0.470392	1	no
Glyma01g29070	Glyma01g29070	Glyma01g29070	Gm01:39200746-39201279	14-13-0	14-13-7	NOTEST	0	0	0	0	1	1	no
Glyma01g29091	Glyma01g29091	Glyma01g29091	Gm01:39202322-39203074	14-13-0	14-13-7	NOTEST	0	0	0	0	1	1	no
Glyma01g29110	Glyma01g29110	Glyma01g29110	Gm01:39206637-39207905	14-13-0	14-13-7	NOTEST	0	0	0	0	1	1	no
Glyma01g29131	Glyma01g29131	Glyma01g29131	Gm01:39211228-39211501	14-13-0	14-13-7	NOTEST	0	0	0	0	1	1	no
Glyma01g29150	Glyma01g29150	Glyma01g29150	Gm01:39249319-39254445	14-13-0	14-13-7	OK	2.30087	1.66388	-0.467628	0.760985	0.446666	0.780632	no
Glyma01g29171	Glyma01g29171	Glyma01g29171	Gm01:39255360-39265417	14-13-0	14-13-7	OK	0.5087	2.04878	2.00988	-2.23253	0.0255802	0.180631	no
Glyma01g29190	Glyma01g29190	Glyma01g29190	Gm01:39285279-39288819	14-13-0	14-13-7	NOTEST	0	0	0	0	1	1	no
Glyma01g29220	Glyma01g29220	Glyma01g29220	Gm01:39316166-39317298	14-13-0	14-13-7	NOTEST	0	0	0	0	1	1	no
Glyma01g29230	Glyma01g29230	Glyma01g29230	Gm01:39317900-39318629	14-13-0	14-13-7	NOTEST	0	0	0	0	1	1	no
Glyma01g29255	Glyma01g29255	Glyma01g29255	Gm01:39318953-39319509	14-13-0	14-13-7	NOTEST	0	0	0	0	1	1	no
Glyma01g29280	Glyma01g29280	Glyma01g29280	Gm01:39350672-39358098	14-13-0	14-13-7	OK	2.76137	2.63094	-0.0698053	0.10922	0.913028	0.981749	no
Glyma01g29305	Glyma01g29305	Glyma01g29305	Gm01:39376341-39388072	14-13-0	14-13-7	OK	1.57286	5.00781	1.67078	-2.38002	0.0173119	0.14382	no
Glyma01g29330	Glyma01g29330	Glyma01g29330	Gm01:39403861-39412277	14-13-0	14-13-7	OK	2.19333	6.65024	1.60029	-2.63652	0.00837608	0.0953791	no
Glyma01g29346	Glyma01g29346	Glyma01g29346	Gm01:39421332-39429591	14-13-0	14-13-7	OK	1.22588	3.54507	1.53199	-2.09513	0.0361593	0.219632	no
Glyma01g29362	Glyma01g29362	Glyma01g29362	Gm01:39443729-39458833	14-13-0	14-13-7	OK	4.09074	8.87816	1.1179	-1.88711	0.0591449	0.287883	no
Glyma01g29378	Glyma01g29378	Glyma01g29378	Gm01:39478263-39516299	14-13-0	14-13-7	OK	1.75085	3.72063	1.08749	-1.8245	0.0680758	0.31241	no
Glyma01g29394	Glyma01g29394	Glyma01g29394	Gm01:39526777-39530894	14-13-0	14-13-7	NOTEST	0	0	0	0	1	1	no
Glyma01g29410	Glyma01g29410	Glyma01g29410	Gm01:39591646-39594997	14-13-0	14-13-7	OK	1.03108	1.7664	0.776652	-1.04224	0.297303	0.657387	no
Glyma01g29420	Glyma01g29420	Glyma01g29420	Gm01:39597740-39602942	14-13-0	14-13-7	OK	24.4224	6.91447	-1.82051	3.0187	0.00253858	0.0459885	yes
Glyma01g29440	Glyma01g29440	Glyma01g29440	Gm01:39655886-39656000	14-13-0	14-13-7	NOTEST	0	0	0	0	1	1	no
Glyma01g29470	Glyma01g29470	Glyma01g29470	Gm01:39787035-39797571	14-13-0	14-13-7	OK	5.09669	4.57813	-0.154803	0.268706	0.788156	0.944407	no
Glyma01g29480	Glyma01g29480	Glyma01g29480	Gm01:39799515-39801235	14-13-0	14-13-7	NOTEST	0	0	0	0	1	1	no
Glyma01g29495	Glyma01g29495	Glyma01g29495	Gm01:39818462-39819244	14-13-0	14-13-7	NOTEST	0	0	0	0	1	1	no
Glyma01g29511	Glyma01g29511	Glyma01g29511	Gm01:39824538-39825839	14-13-0	14-13-7	NOTEST	0	0	0	0	1	1	no
Glyma01g29525	Glyma01g29525	Glyma01g29525	Gm01:39837032-39837374	14-13-0	14-13-7	NOTEST	0	0	0	0	1	1	no
Glyma01g29540	Glyma01g29540	Glyma01g29540	Gm01:39848379-39851083	14-13-0	14-13-7	OK	31.3982	15.2387	-1.04294	1.70762	0.0877068	0.358638	no
Glyma01g29570	Glyma01g29570	Glyma01g29570	Gm01:39879227-39883100	14-13-0	14-13-7	NOTEST	0	0.0316396	1.79769e+308	1.79769e+308	0.0573111	1	no
Glyma01g29580	Glyma01g29580	Glyma01g29580	Gm01:39898856-39902291	14-13-0	14-13-7	NOTEST	0	0	0	0	1	1	no
Glyma01g29600	Glyma01g29600	Glyma01g29600	Gm01:39918097-39921140	14-13-0	14-13-7	NOTEST	0	0	0	0	1	1	no
Glyma01g29615	Glyma01g29615	Glyma01g29615	Gm01:39935345-39939812	14-13-0	14-13-7	NOTEST	0.0519312	0.0761213	0.551697	-0.489238	0.624673	1	no
Glyma01g29630	Glyma01g29630	Glyma01g29630	Gm01:39945735-39949387	14-13-0	14-13-7	OK	44.3068	13.9872	-1.66342	2.43042	0.0150813	0.133656	no
Glyma01g29643	Glyma01g29643	Glyma01g29643	Gm01:39958765-39959672	14-13-0	14-13-7	NOTEST	0	0	0	0	1	1	no
Glyma01g29656	Glyma01g29656	Glyma01g29656	Gm01:39965927-39966511	14-13-0	14-13-7	NOTEST	0	0	0	0	1	1	no
Glyma01g29670	Glyma01g29670	Glyma01g29670	Gm01:39988960-39991138	14-13-0	14-13-7	OK	0.151001	0.497511	1.72017	-1.72087	0.0852751	0.353002	no
Glyma01g29715	Glyma01g29715	Glyma01g29715	Gm01:40029815-40030406	14-13-0	14-13-7	NOTEST	0	0.0702548	1.79769e+308	1.79769e+308	0.272654	1	no
Glyma01g29760	Glyma01g29760	Glyma01g29760	Gm01:40077200-40079998	14-13-0	14-13-7	NOTEST	0	0.0414046	1.79769e+308	1.79769e+308	0.190421	1	no
Glyma01g29816	Glyma01g29816	Glyma01g29816	Gm01:40154962-40155672	14-13-0	14-13-7	NOTEST	0.105521	0.0340243	-1.63289	0.488037	0.625523	1	no
Glyma01g29873	Glyma01g29873	Glyma01g29873	Gm01:40234344-40236298	14-13-0	14-13-7	NOTEST	0	0.0326675	1.79769e+308	1.79769e+308	0.113214	1	no
Glyma01g29930	Glyma01g29930	Glyma01g29930	Gm01:40499102-40503250	14-13-0	14-13-7	OK	1.8407	9.24202	2.32795	-3.35362	0.000797616	0.0211034	yes
Glyma01g29950	Glyma01g29950	Glyma01g29950	Gm01:40560867-40564466	14-13-0	14-13-7	OK	6.35227	12.3799	0.962649	-1.66327	0.0962583	0.377086	no
Glyma01g29970	Glyma01g29970	Glyma01g29970	Gm01:40574051-40575558	14-13-0	14-13-7	NOTEST	0	0	0	0	1	1	no
Glyma01g30000	Glyma01g30000	Glyma01g30000	Gm01:40668497-40669995	14-13-0	14-13-7	NOTEST	0	0	0	0	1	1	no
Glyma01g30010	Glyma01g30010	Glyma01g30010	Gm01:40681967-40683465	14-13-0	14-13-7	NOTEST	0	0	0	0	1	1	no
Glyma01g30020	Glyma01g30020	Glyma01g30020	Gm01:40733504-40735002	14-13-0	14-13-7	NOTEST	0	0	0	0	1	1	no
Glyma01g30030	Glyma01g30030	Glyma01g30030	Gm01:40745198-40746696	14-13-0	14-13-7	NOTEST	0	0	0	0	1	1	no
Glyma01g30040	Glyma01g30040	Glyma01g30040	Gm01:40756924-40758421	14-13-0	14-13-7	NOTEST	0	0	0	0	1	1	no
Glyma01g30060	Glyma01g30060	Glyma01g30060	Gm01:40769686-40771162	14-13-0	14-13-7	NOTEST	0	0	0	0	1	1	no
Glyma01g30080	Glyma01g30080	Glyma01g30080	Gm01:40777029-40778052	14-13-0	14-13-7	NOTEST	0	0	0	0	1	1	no
Glyma01g30300	Glyma01g30300	Glyma01g30300	Gm01:40952282-40957143	14-13-0	14-13-7	OK	2.61922	2.95841	0.175683	-0.279256	0.780048	0.941127	no
Glyma01g30320	Glyma01g30320	Glyma01g30320	Gm01:40964890-40985483	14-13-0	14-13-7	OK	7.68019	6.80085	-0.175427	0.28	0.779478	0.941016	no
Glyma01g30335	Glyma01g30335	Glyma01g30335	Gm01:40964890-40985483	14-13-0	14-13-7	NOTEST	0.314567	0.346149	0.138023	-0.0328739	0.973775	1	no
Glyma01g30350	Glyma01g30350	Glyma01g30350	Gm01:41014087-41016040	14-13-0	14-13-7	OK	40.541	50.5358	0.317922	-0.489971	0.624154	0.879656	no
Glyma01g30370	Glyma01g30370	Glyma01g30370	Gm01:41043490-41043758	14-13-0	14-13-7	NOTEST	0	0	0	0	1	1	no
Glyma01g30390	Glyma01g30390	Glyma01g30390	Gm01:41062775-41066889	14-13-0	14-13-7	OK	3.51916	6.29323	0.838567	-1.38683	0.165495	0.500044	no
Glyma01g30400	Glyma01g30400	Glyma01g30400	Gm01:41067190-41075707	14-13-0	14-13-7	OK	8.92622	8.89672	-0.00477547	0.00826045	0.993409	0.998398	no
Glyma01g30431	Glyma01g30431	Glyma01g30431	Gm01:41163921-41165539	14-13-0	14-13-7	NOTEST	0	0	0	0	1	1	no
Glyma01g30460	Glyma01g30460	Glyma01g30460	Gm01:41170972-41176563	14-13-0	14-13-7	NOTEST	0	0	0	0	1	1	no
Glyma01g30485	Glyma01g30485	Glyma01g30485	Gm01:41170972-41176563	14-13-0	14-13-7	NOTEST	0.0528795	0.014096	-1.90742	0.874622	0.38178	1	no
Glyma01g30511	Glyma01g30511	Glyma01g30511	Gm01:41210645-41210897	14-13-0	14-13-7	NOTEST	0	0	0	0	1	1	no
Glyma01g30535	Glyma01g30535	Glyma01g30535	Gm01:41215563-41218988	14-13-0	14-13-7	NOTEST	0	0	0	0	1	1	no
Glyma01g30560	Glyma01g30560	Glyma01g30560	Gm01:41232630-41234794	14-13-0	14-13-7	NOTEST	0	0	0	0	1	1	no
Glyma01g30610	Glyma01g30610	Glyma01g30610	Gm01:41406971-41411553	14-13-0	14-13-7	NOTEST	0	0	0	0	1	1	no
Glyma01g30626	Glyma01g30626	Glyma01g30626	Gm01:41440314-41440973	14-13-0	14-13-7	NOTEST	0	0	0	0	1	1	no
Glyma01g30643	Glyma01g30643	Glyma01g30643	Gm01:41457347-41461938	14-13-0	14-13-7	NOTEST	0	0	0	0	1	1	no
Glyma01g30660	Glyma01g30660	Glyma01g30660	Gm01:41493462-41493999	14-13-0	14-13-7	NOTEST	0	0	0	0	1	1	no
Glyma01g30670	Glyma01g30670	Glyma01g30670	Gm01:41495108-41496829	14-13-0	14-13-7	NOTEST	0	0.168446	1.79769e+308	1.79769e+308	0.0445687	1	no
Glyma01g30900	Glyma01g30900	Glyma01g30900	Gm01:41673575-41673782	14-13-0	14-13-7	NOTEST	0	0	0	0	1	1	no
Glyma01g30910	Glyma01g30910	Glyma01g30910	Gm01:41681659-41690953	14-13-0	14-13-7	OK	11.6439	10.6313	-0.131263	0.229301	0.818635	0.955848	no
Glyma01g30920	Glyma01g30920	Glyma01g30920	Gm01:41691541-41699290	14-13-0	14-13-7	NOTEST	0.0802337	0.11723	0.547057	-0.482412	0.629513	1	no
Glyma01g30982	Glyma01g30982	Glyma01g30982	Gm01:41712879-41714252	14-13-0	14-13-7	OK	0.841048	1.98333	1.23766	-1.51215	0.130496	0.441358	no
Glyma01g31044	Glyma01g31044	Glyma01g31044	Gm01:41890431-41892644	14-13-0	14-13-7	OK	1.67845	1.47803	-0.183452	0.24851	0.80374	0.95037	no
Glyma01g31107	Glyma01g31107	Glyma01g31107	Gm01:41928201-41933073	14-13-0	14-13-7	NOTEST	0	0	0	0	1	1	no
Glyma01g31170	Glyma01g31170	Glyma01g31170	Gm01:41986790-41991338	14-13-0	14-13-7	OK	2.91154	3.32104	0.189853	-0.329317	0.741916	0.925736	no
Glyma01g31180	Glyma01g31180	Glyma01g31180	Gm01:41992765-41993572	14-13-0	14-13-7	OK	0.71285	1.43901	1.0134	-1.08566	0.277629	0.638004	no
Glyma01g31230	Glyma01g31230	Glyma01g31230	Gm01:42040491-42046500	14-13-0	14-13-7	NOTEST	0	0.184531	1.79769e+308	1.79769e+308	0.113895	1	no
Glyma01g31260	Glyma01g31260	Glyma01g31260	Gm01:42062020-42069161	14-13-0	14-13-7	OK	7.10277	2.97954	-1.25329	2.08856	0.0367476	0.2213	no
Glyma01g31270	Glyma01g31270	Glyma01g31270	Gm01:42071523-42074445	14-13-0	14-13-7	OK	22.867	5.82124	-1.97387	3.31145	0.000928135	0.0233995	yes
Glyma01g31275	Glyma01g31275	Glyma01g31275	Gm01:42077853-42078844	14-13-0	14-13-7	NOTEST	0	0	0	0	1	1	no
Glyma01g31280	Glyma01g31280	Glyma01g31280	Gm01:42077853-42078844	14-13-0	14-13-7	NOTEST	0	0	0	0	1	1	no
Glyma01g31300	Glyma01g31300	Glyma01g31300	Gm01:42124055-42127597	14-13-0	14-13-7	OK	543.339	2.15954	-7.97498	9.6762	0	0	yes
Glyma01g31311	Glyma01g31311	Glyma01g31311	Gm01:42143417-42149831	14-13-0	14-13-7	OK	7.65822	6.58749	-0.21728	0.358677	0.719837	0.91813	no
Glyma01g31320	Glyma01g31320	Glyma01g31320	Gm01:42162374-42164312	14-13-0	14-13-7	OK	4.93095	2.1761	-1.18012	1.8795	0.060176	0.290725	no
Glyma01g31341	Glyma01g31341	Glyma01g31341	Gm01:42226588-42230852	14-13-0	14-13-7	NOTEST	0	0.0642469	1.79769e+308	1.79769e+308	0.0692411	1	no
Glyma01g31360	Glyma01g31360	Glyma01g31360	Gm01:42232501-42236451	14-13-0	14-13-7	OK	24.0312	16.9033	-0.507605	0.81254	0.416482	0.75868	no
Glyma01g31370	Glyma01g31370	Glyma01g31370	Gm01:42261741-42265856	14-13-0	14-13-7	NOTEST	0.26418	0.221426	-0.254695	0.264852	0.791123	1	no
Glyma01g31425	Glyma01g31425	Glyma01g31425	Gm01:42373253-42374275	14-13-0	14-13-7	OK	3.03301	1.4504	-1.0643	1.07387	0.28288	0.643015	no
Glyma01g31480	Glyma01g31480	Glyma01g31480	Gm01:42378220-42384123	14-13-0	14-13-7	OK	0.759763	0.594262	-0.354449	0.491686	0.622941	0.878851	no
Glyma01g31520	Glyma01g31520	Glyma01g31520	Gm01:42469464-42474210	14-13-0	14-13-7	NOTEST	0	0	0	0	1	1	no
Glyma01g31550	Glyma01g31550	Glyma01g31550	Gm01:42548413-42558287	14-13-0	14-13-7	NOTEST	0	0	0	0	1	1	no
Glyma01g31570	Glyma01g31570	Glyma01g31570	Gm01:42586307-42593931	14-13-0	14-13-7	OK	6.03636	3.46822	-0.799482	1.36546	0.172109	0.509671	no
Glyma01g31581	Glyma01g31581	Glyma01g31581	Gm01:42597638-42599280	14-13-0	14-13-7	NOTEST	0	0	0	0	1	1	no
Glyma01g31590	Glyma01g31590	Glyma01g31590	Gm01:42607296-42611243	14-13-0	14-13-7	NOTEST	0.152254	0.27725	0.86471	-0.964962	0.334564	1	no
Glyma01g31600	Glyma01g31600	Glyma01g31600	Gm01:42628300-42629673	14-13-0	14-13-7	OK	28.4462	27.3263	-0.0579464	0.0937795	0.925284	0.984857	no
Glyma01g31610	Glyma01g31610	Glyma01g31610	Gm01:42631340-42634983	14-13-0	14-13-7	OK	21.8917	13.818	-0.66383	1.11254	0.265906	0.625285	no
Glyma01g31630	Glyma01g31630	Glyma01g31630	Gm01:42661065-42664809	14-13-0	14-13-7	OK	0.372662	2.33755	2.64906	-2.60587	0.00916401	0.099929	no
Glyma01g31636	Glyma01g31636	Glyma01g31636	Gm01:42667422-42670895	14-13-0	14-13-7	NOTEST	0	0	0	0	1	1	no
Glyma01g31643	Glyma01g31643	Glyma01g31643	Gm01:42681129-42683618	14-13-0	14-13-7	NOTEST	0	0	0	0	1	1	no
Glyma01g31650	Glyma01g31650	Glyma01g31650	Gm01:42697267-42701819	14-13-0	14-13-7	NOTEST	0	0	0	0	1	1	no
Glyma01g31660	Glyma01g31660	Glyma01g31660	Gm01:42724418-42726114	14-13-0	14-13-7	NOTEST	0.180844	0.0315463	-2.51921	1.33947	0.180418	1	no
Glyma01g31670	Glyma01g31670	Glyma01g31670	Gm01:42752424-42753269	14-13-0	14-13-7	NOTEST	0	0	0	0	1	1	no
Glyma01g31691	Glyma01g31691	Glyma01g31691	Gm01:42756407-42766923	14-13-0	14-13-7	NOTEST	0	0	0	0	1	1	no
Glyma01g31711	Glyma01g31711	Glyma01g31711	Gm01:42786261-42789612	14-13-0	14-13-7	NOTEST	0	0	0	0	1	1	no
Glyma01g31730	Glyma01g31730	Glyma01g31730	Gm01:42867418-42868294	14-13-0	14-13-7	NOTEST	0	0	0	0	1	1	no
Glyma01g31750	Glyma01g31750	Glyma01g31750	Gm01:42942064-42943179	14-13-0	14-13-7	OK	13.5577	14.1907	0.0658349	-0.114844	0.908569	0.980689	no
Glyma01g31760	Glyma01g31760	Glyma01g31760	Gm01:42947350-42947710	14-13-0	14-13-7	NOTEST	0	0	0	0	1	1	no
Glyma01g31780	Glyma01g31780	Glyma01g31780	Gm01:42956928-42957282	14-13-0	14-13-7	NOTEST	0	0	0	0	1	1	no
Glyma01g31801	Glyma01g31801	Glyma01g31801	Gm01:43007888-43008997	14-13-0	14-13-7	NOTEST	0	0	0	0	1	1	no
Glyma01g31820	Glyma01g31820	Glyma01g31820	Gm01:43013160-43013421	14-13-0	14-13-7	NOTEST	0	0	0	0	1	1	no
Glyma01g31830	Glyma01g31830	Glyma01g31830	Gm01:43025615-43026886	14-13-0	14-13-7	OK	6.98685	3.48515	-1.00342	1.63023	0.103053	0.39161	no
Glyma01g31840	Glyma01g31840	Glyma01g31840	Gm01:43069330-43072880	14-13-0	14-13-7	OK	0.560411	1.05111	0.907357	-1.25039	0.211158	0.559187	no
Glyma01g31850	Glyma01g31850	Glyma01g31850	Gm01:43076459-43079732	14-13-0	14-13-7	NOTEST	0	0	0	0	1	1	no
Glyma01g31860	Glyma01g31860	Glyma01g31860	Gm01:43090292-43094391	14-13-0	14-13-7	NOTEST	0	0	0	0	1	1	no
Glyma01g31890	Glyma01g31890	Glyma01g31890	Gm01:43130697-43137550	14-13-0	14-13-7	OK	0.81262	0.458524	-0.825582	0.871421	0.383524	0.732661	no
Glyma01g31900	Glyma01g31900	Glyma01g31900	Gm01:43140964-43144007	14-13-0	14-13-7	NOTEST	0.0374648	0.370912	3.30747	-2.34739	0.0189055	1	no
Glyma01g31910	Glyma01g31910	Glyma01g31910	Gm01:43154205-43156585	14-13-0	14-13-7	NOTEST	0	0	0	0	1	1	no
Glyma01g31921	Glyma01g31921	Glyma01g31921	Gm01:43157131-43160950	14-13-0	14-13-7	OK	0.305908	0.502252	0.715315	-0.789433	0.429859	0.769468	no
Glyma01g31930	Glyma01g31930	Glyma01g31930	Gm01:43173872-43179341	14-13-0	14-13-7	OK	1.93447	0.613796	-1.65611	2.44005	0.0146854	0.131459	no
Glyma01g31940	Glyma01g31940	Glyma01g31940	Gm01:43217711-43224924	14-13-0	14-13-7	NOTEST	0.305729	0.0895112	-1.77211	1.49328	0.135363	1	no
Glyma01g31961	Glyma01g31961	Glyma01g31961	Gm01:43241123-43245445	14-13-0	14-13-7	NOTEST	0	0	0	0	1	1	no
Glyma01g31980	Glyma01g31980	Glyma01g31980	Gm01:43250905-43255641	14-13-0	14-13-7	NOTEST	0	0	0	0	1	1	no
Glyma01g31990	Glyma01g31990	Glyma01g31990	Gm01:43250905-43255641	14-13-0	14-13-7	OK	6.48662	3.48482	-0.896384	1.41069	0.158336	0.488212	no
Glyma01g32000	Glyma01g32000	Glyma01g32000	Gm01:43264508-43272659	14-13-0	14-13-7	OK	4.89218	6.61977	0.436303	-0.705375	0.480577	0.804001	no
Glyma01g32010	Glyma01g32010	Glyma01g32010	Gm01:43337913-43338530	14-13-0	14-13-7	NOTEST	0	0	0	0	1	1	no
Glyma01g32020	Glyma01g32020	Glyma01g32020	Gm01:43341907-43343025	14-13-0	14-13-7	NOTEST	0	0	0	0	1	1	no
Glyma01g32031	Glyma01g32031	Glyma01g32031	Gm01:43354010-43355755	14-13-0	14-13-7	NOTEST	0	0	0	0	1	1	no
Glyma01g32040	Glyma01g32040	Glyma01g32040	Gm01:43398690-43400994	14-13-0	14-13-7	NOTEST	0	0	0	0	1	1	no
Glyma01g32070	Glyma01g32070	Glyma01g32070	Gm01:43424973-43427243	14-13-0	14-13-7	NOTEST	0	0	0	0	1	1	no
Glyma01g32081	Glyma01g32081	Glyma01g32081	Gm01:43450179-43450730	14-13-0	14-13-7	OK	0	0.64077	1.79769e+308	1.79769e+308	0.0387476	0.228204	no
Glyma01g32090	Glyma01g32090	Glyma01g32090	Gm01:43463846-43470841	14-13-0	14-13-7	OK	1.84592	8.79669	2.25262	-3.61719	0.000297814	0.0104197	yes
Glyma01g32103	Glyma01g32103	Glyma01g32103	Gm01:43463846-43470841	14-13-0	14-13-7	OK	0.262137	1.59578	2.60587	-0.761943	0.446094	0.780258	no
Glyma01g32116	Glyma01g32116	Glyma01g32116	Gm01:43502972-43506823	14-13-0	14-13-7	NOTEST	0.250394	0.0953924	-1.39226	1.26417	0.206168	1	no
Glyma01g32130	Glyma01g32130	Glyma01g32130	Gm01:43553617-43555903	14-13-0	14-13-7	NOTEST	0	0.239993	1.79769e+308	1.79769e+308	0.0485508	1	no
Glyma01g32140	Glyma01g32140	Glyma01g32140	Gm01:43570735-43574743	14-13-0	14-13-7	OK	1.07419	1.54635	0.525623	-0.613503	0.539544	0.837575	no
Glyma01g32160	Glyma01g32160	Glyma01g32160	Gm01:43604977-43607065	14-13-0	14-13-7	NOTEST	0	0	0	0	1	1	no
Glyma01g32190	Glyma01g32190	Glyma01g32190	Gm01:43621003-43623360	14-13-0	14-13-7	NOTEST	0	0	0	0	1	1	no
Glyma01g32211	Glyma01g32211	Glyma01g32211	Gm01:43638172-43638537	14-13-0	14-13-7	NOTEST	0	0	0	0	1	1	no
Glyma01g32230	Glyma01g32230	Glyma01g32230	Gm01:43687454-43687922	14-13-0	14-13-7	NOTEST	0.223231	0.126114	-0.823813	0.277821	0.781149	1	no
Glyma01g32270	Glyma01g32270	Glyma01g32270	Gm01:43720350-43722510	14-13-0	14-13-7	NOTEST	0	0	0	0	1	1	no
Glyma01g32291	Glyma01g32291	Glyma01g32291	Gm01:43773470-43774094	14-13-0	14-13-7	OK	1.52406	0.62024	-1.29702	1.12389	0.261058	0.620242	no
Glyma01g32310	Glyma01g32310	Glyma01g32310	Gm01:43784204-43786716	14-13-0	14-13-7	NOTEST	0	0	0	0	1	1	no
Glyma01g32340	Glyma01g32340	Glyma01g32340	Gm01:43819827-43820154	14-13-0	14-13-7	NOTEST	0	0	0	0	1	1	no
Glyma01g32360	Glyma01g32360	Glyma01g32360	Gm01:43828911-43832736	14-13-0	14-13-7	NOTEST	0	0.02026	1.79769e+308	1.79769e+308	0.196186	1	no
Glyma01g32370	Glyma01g32370	Glyma01g32370	Gm01:43834206-43835697	14-13-0	14-13-7	OK	2.90743	8.16242	1.48925	-2.40358	0.0162356	0.139009	no
Glyma01g32380	Glyma01g32380	Glyma01g32380	Gm01:43870379-43873398	14-13-0	14-13-7	OK	1.13877	2.68503	1.23746	-1.92962	0.0536537	0.273316	no
Glyma01g32390	Glyma01g32390	Glyma01g32390	Gm01:43912452-43917776	14-13-0	14-13-7	NOTEST	0.145499	0.0392828	-1.88904	0.645435	0.518645	1	no
Glyma01g32400	Glyma01g32400	Glyma01g32400	Gm01:43922908-43926832	14-13-0	14-13-7	OK	4.14208	7.03648	0.764499	-1.32645	0.184692	0.527201	no
Glyma01g32415	Glyma01g32415	Glyma01g32415	Gm01:43929164-43930175	14-13-0	14-13-7	NOTEST	0	0	0	0	1	1	no
Glyma01g32430	Glyma01g32430	Glyma01g32430	Gm01:43974483-43977133	14-13-0	14-13-7	OK	0.218368	1.00359	2.20034	-2.77885	0.00545513	0.0740272	no
Glyma01g32440	Glyma01g32440	Glyma01g32440	Gm01:43989758-43991730	14-13-0	14-13-7	OK	1.85179	0.91252	-1.021	1.4549	0.145696	0.46731	no
Glyma01g32450	Glyma01g32450	Glyma01g32450	Gm01:44035709-44042969	14-13-0	14-13-7	OK	51.5115	33.5026	-0.620621	0.861264	0.389093	0.737519	no
Glyma01g32460	Glyma01g32460	Glyma01g32460	Gm01:44035709-44042969	14-13-0	14-13-7	LOWDATA	0	0	-0.620621	0	1	1	no
Glyma01g32480	Glyma01g32480	Glyma01g32480	Gm01:44085644-44091881	14-13-0	14-13-7	NOTEST	0	0	0	0	1	1	no
Glyma01g32680	Glyma01g32680	Glyma01g32680	Gm01:44207946-44213690	14-13-0	14-13-7	OK	3.54433	1.77675	-0.996271	1.47275	0.14082	0.459132	no
Glyma01g32690	Glyma01g32690	Glyma01g32690	Gm01:44229408-44236211	14-13-0	14-13-7	OK	5.24693	6.3219	0.268887	-0.468116	0.639702	0.886897	no
Glyma01g32750	Glyma01g32750	Glyma01g32750	Gm01:44319318-44320867	14-13-0	14-13-7	OK	2280.2	2415.01	0.082869	-0.0774106	0.938297	0.987654	no
Glyma01g32760	Glyma01g32760	Glyma01g32760	Gm01:44347887-44349526	14-13-0	14-13-7	OK	0.0849772	1.15346	3.76274	-2.70461	0.00683846	0.0847371	no
Glyma01g32775	Glyma01g32775	Glyma01g32775	Gm01:44353224-44356977	14-13-0	14-13-7	NOTEST	0	0.0184404	1.79769e+308	1.79769e+308	0.196186	1	no
Glyma01g32790	Glyma01g32790	Glyma01g32790	Gm01:44365503-44368345	14-13-0	14-13-7	OK	3.11249	2.83546	-0.134486	0.218891	0.826735	0.958709	no
Glyma01g32800	Glyma01g32800	Glyma01g32800	Gm01:44381434-44383734	14-13-0	14-13-7	OK	0.506939	0.11124	-2.18814	1.97983	0.0477228	0.256358	no
Glyma01g32810	Glyma01g32810	Glyma01g32810	Gm01:44384412-44392444	14-13-0	14-13-7	OK	0.438414	1.15075	1.39221	-1.75682	0.0789485	0.338251	no
Glyma01g32825	Glyma01g32825	Glyma01g32825	Gm01:44418267-44430426	14-13-0	14-13-7	NOTEST	0	0.0201106	1.79769e+308	1.79769e+308	0.196186	1	no
Glyma01g32841	Glyma01g32841	Glyma01g32841	Gm01:44482207-44482737	14-13-0	14-13-7	NOTEST	0	0	0	0	1	1	no
Glyma01g32855	Glyma01g32855	Glyma01g32855	Gm01:44489898-44494310	14-13-0	14-13-7	NOTEST	0.103092	0.208078	1.01319	-1.02072	0.307386	1	no
Glyma01g32870	Glyma01g32870	Glyma01g32870	Gm01:44497093-44498739	14-13-0	14-13-7	OK	17.1133	15.7452	-0.120209	0.204305	0.838115	0.962285	no
Glyma01g32881	Glyma01g32881	Glyma01g32881	Gm01:44501342-44502103	14-13-0	14-13-7	OK	2.19271	1.9737	-0.151811	0.182658	0.855066	0.967086	no
Glyma01g32890	Glyma01g32890	Glyma01g32890	Gm01:44504750-44507253	14-13-0	14-13-7	OK	2.08678	2.03891	-0.0334857	0.0351331	0.971974	0.995096	no
Glyma01g32900	Glyma01g32900	Glyma01g32900	Gm01:44534734-44540055	14-13-0	14-13-7	NOTEST	0	0	0	0	1	1	no
Glyma01g32920	Glyma01g32920	Glyma01g32920	Gm01:44562541-44564228	14-13-0	14-13-7	NOTEST	0.323243	0.0675431	-2.25874	1.60335	0.108858	1	no
Glyma01g32940	Glyma01g32940	Glyma01g32940	Gm01:44595567-44597755	14-13-0	14-13-7	NOTEST	0	0	0	0	1	1	no
Glyma01g32961	Glyma01g32961	Glyma01g32961	Gm01:44638341-44639787	14-13-0	14-13-7	NOTEST	0	0	0	0	1	1	no
Glyma01g32981	Glyma01g32981	Glyma01g32981	Gm01:44662613-44664324	14-13-0	14-13-7	NOTEST	0.313944	0.0554593	-2.50101	2.11641	0.0343102	1	no
Glyma01g33000	Glyma01g33000	Glyma01g33000	Gm01:44707383-44712370	14-13-0	14-13-7	NOTEST	0.183787	0.0641939	-1.51753	1.04355	0.296695	1	no
Glyma01g33017	Glyma01g33017	Glyma01g33017	Gm01:44713495-44722187	14-13-0	14-13-7	OK	4.88819	3.98152	-0.295982	0.487516	0.625892	0.88068	no
Glyma01g33034	Glyma01g33034	Glyma01g33034	Gm01:44713495-44722187	14-13-0	14-13-7	OK	0.487325	0.798363	0.712159	-0.373424	0.708833	0.914409	no
Glyma01g33052	Glyma01g33052	Glyma01g33052	Gm01:44724345-44725089	14-13-0	14-13-7	NOTEST	0	0	0	0	1	1	no
Glyma01g33070	Glyma01g33070	Glyma01g33070	Gm01:44755155-44764276	14-13-0	14-13-7	NOTEST	0.292222	0.0514606	-2.50552	1.34488	0.178664	1	no
Glyma01g33080	Glyma01g33080	Glyma01g33080	Gm01:44784821-44785786	14-13-0	14-13-7	NOTEST	0	0	0	0	1	1	no
Glyma01g33097	Glyma01g33097	Glyma01g33097	Gm01:44790872-44791190	14-13-0	14-13-7	OK	0	0.848939	1.79769e+308	1.79769e+308	0.113214	0.411497	no
Glyma01g33114	Glyma01g33114	Glyma01g33114	Gm01:44806144-44806480	14-13-0	14-13-7	NOTEST	0	0	0	0	1	1	no
Glyma01g33132	Glyma01g33132	Glyma01g33132	Gm01:44822529-44827918	14-13-0	14-13-7	NOTEST	0	0	0	0	1	1	no
Glyma01g33150	Glyma01g33150	Glyma01g33150	Gm01:44831611-44835997	14-13-0	14-13-7	NOTEST	0.0312497	0	-1.79769e+308	-1.79769e+308	0.123372	1	no
Glyma01g33160	Glyma01g33160	Glyma01g33160	Gm01:44884977-44888493	14-13-0	14-13-7	NOTEST	0	0	0	0	1	1	no
Glyma01g33170	Glyma01g33170	Glyma01g33170	Gm01:44905880-44910333	14-13-0	14-13-7	NOTEST	0	0.0225074	1.79769e+308	1.79769e+308	0.196186	1	no
Glyma01g33181	Glyma01g33181	Glyma01g33181	Gm01:44911452-44912574	14-13-0	14-13-7	NOTEST	0	0	0	0	1	1	no
Glyma01g33191	Glyma01g33191	Glyma01g33191	Gm01:44940045-44941190	14-13-0	14-13-7	NOTEST	0	0	0	0	1	1	no
Glyma01g33200	Glyma01g33200	Glyma01g33200	Gm01:44962980-44967133	14-13-0	14-13-7	OK	20.7574	8.65502	-1.26202	2.15909	0.0308429	0.201095	no
Glyma01g33220	Glyma01g33220	Glyma01g33220	Gm01:44980052-44984577	14-13-0	14-13-7	OK	5.90877	8.35661	0.50006	-0.859942	0.389821	0.73814	no
Glyma01g33240	Glyma01g33240	Glyma01g33240	Gm01:45046813-45053379	14-13-0	14-13-7	OK	5.57462	5.64774	0.0187988	-0.0327712	0.973857	0.995484	no
Glyma01g33270	Glyma01g33270	Glyma01g33270	Gm01:45164206-45167759	14-13-0	14-13-7	OK	8.38096	8.18132	-0.0347827	0.0589608	0.952983	0.990322	no
Glyma01g33281	Glyma01g33281	Glyma01g33281	Gm01:45184472-45185139	14-13-0	14-13-7	NOTEST	0	0	0	0	1	1	no
Glyma01g33290	Glyma01g33290	Glyma01g33290	Gm01:45230344-45235073	14-13-0	14-13-7	OK	4.62122	2.84286	-0.700928	1.20751	0.227238	0.580093	no
Glyma01g33300	Glyma01g33300	Glyma01g33300	Gm01:45287112-45288519	14-13-0	14-13-7	NOTEST	0	0	0	0	1	1	no
Glyma01g33313	Glyma01g33313	Glyma01g33313	Gm01:45306250-45306442	14-13-0	14-13-7	NOTEST	0	0	0	0	1	1	no
Glyma01g33326	Glyma01g33326	Glyma01g33326	Gm01:45317460-45320741	14-13-0	14-13-7	NOTEST	0	0	0	0	1	1	no
Glyma01g33340	Glyma01g33340	Glyma01g33340	Gm01:45339891-45344677	14-13-0	14-13-7	NOTEST	0.246047	0.162337	-0.599938	0.540963	0.588533	1	no
Glyma01g33350	Glyma01g33350	Glyma01g33350	Gm01:45352146-45354813	14-13-0	14-13-7	NOTEST	0	0.132284	1.79769e+308	1.79769e+308	0.0692411	1	no
Glyma01g33370	Glyma01g33370	Glyma01g33370	Gm01:45401644-45404974	14-13-0	14-13-7	NOTEST	0.247073	0.260962	0.0789052	-0.0750568	0.94017	1	no
Glyma01g33380	Glyma01g33380	Glyma01g33380	Gm01:45433046-45455133	14-13-0	14-13-7	OK	2.44173	2.61115	0.0967849	-0.113667	0.909502	0.980897	no
Glyma01g33420	Glyma01g33420	Glyma01g33420	Gm01:45530801-45532165	14-13-0	14-13-7	NOTEST	0.230864	0.242274	0.069598	-0.0662035	0.947216	1	no
Glyma01g33430	Glyma01g33430	Glyma01g33430	Gm01:45548731-45551079	14-13-0	14-13-7	NOTEST	0	0.0307777	1.79769e+308	1.79769e+308	0.196186	1	no
Glyma01g33440	Glyma01g33440	Glyma01g33440	Gm01:45561036-45565329	14-13-0	14-13-7	NOTEST	0.111368	0.0296119	-1.91109	1.33884	0.180624	1	no
Glyma01g33461	Glyma01g33461	Glyma01g33461	Gm01:45637083-45640786	14-13-0	14-13-7	NOTEST	0	0	0	0	1	1	no
Glyma01g33480	Glyma01g33480	Glyma01g33480	Gm01:45640951-45643255	14-13-0	14-13-7	NOTEST	0	0.0172857	1.79769e+308	1.79769e+308	0.196186	1	no
Glyma01g33500	Glyma01g33500	Glyma01g33500	Gm01:45666010-45668198	14-13-0	14-13-7	NOTEST	0	0	0	0	1	1	no
Glyma01g33510	Glyma01g33510	Glyma01g33510	Gm01:45669204-45672362	14-13-0	14-13-7	NOTEST	0	0	0	0	1	1	no
Glyma01g33520	Glyma01g33520	Glyma01g33520	Gm01:45685075-45692774	14-13-0	14-13-7	OK	9.42372	7.21404	-0.385489	0.641361	0.521288	0.826242	no
Glyma01g33560	Glyma01g33560	Glyma01g33560	Gm01:45743456-45744317	14-13-0	14-13-7	NOTEST	0	0	0	0	1	1	no
Glyma01g33575	Glyma01g33575	Glyma01g33575	Gm01:45782142-45782607	14-13-0	14-13-7	NOTEST	0	0	0	0	1	1	no
Glyma01g33590	Glyma01g33590	Glyma01g33590	Gm01:45785878-45786501	14-13-0	14-13-7	NOTEST	0	0.0826689	1.79769e+308	1.79769e+308	0.196186	1	no
Glyma01g33600	Glyma01g33600	Glyma01g33600	Gm01:45786844-45790318	14-13-0	14-13-7	OK	4.98558	6.03306	0.275128	-0.410727	0.681272	0.903833	no
Glyma01g33610	Glyma01g33610	Glyma01g33610	Gm01:45796676-45800002	14-13-0	14-13-7	OK	6.21101	5.17679	-0.26277	0.453301	0.650332	0.890848	no
Glyma01g33620	Glyma01g33620	Glyma01g33620	Gm01:45803536-45806513	14-13-0	14-13-7	OK	0.791239	0.853098	0.108599	-0.133045	0.894158	0.977416	no
Glyma01g33635	Glyma01g33635	Glyma01g33635	Gm01:45827324-45830713	14-13-0	14-13-7	NOTEST	0	0	0	0	1	1	no
Glyma01g33650	Glyma01g33650	Glyma01g33650	Gm01:45852397-45854700	14-13-0	14-13-7	OK	2.41117	3.1363	0.379331	-0.635084	0.525373	0.828523	no
Glyma01g33660	Glyma01g33660	Glyma01g33660	Gm01:45858147-45867014	14-13-0	14-13-7	OK	20.9392	8.38639	-1.32009	2.16615	0.0302996	0.199502	no
Glyma01g33676	Glyma01g33676	Glyma01g33676	Gm01:45892351-45898318	14-13-0	14-13-7	OK	1.70515	0.66802	-1.35193	1.92558	0.0541564	0.274863	no
Glyma01g33692	Glyma01g33692	Glyma01g33692	Gm01:45905544-45906417	14-13-0	14-13-7	NOTEST	0	0	0	0	1	1	no
Glyma01g33708	Glyma01g33708	Glyma01g33708	Gm01:45911622-45912362	14-13-0	14-13-7	NOTEST	0	0	0	0	1	1	no
Glyma01g33724	Glyma01g33724	Glyma01g33724	Gm01:45932771-45933893	14-13-0	14-13-7	OK	5.71509	2.42125	-1.23903	1.93442	0.053061	0.271686	no
Glyma01g33740	Glyma01g33740	Glyma01g33740	Gm01:45948913-45964890	14-13-0	14-13-7	NOTEST	0	0	0	0	1	1	no
Glyma01g33761	Glyma01g33761	Glyma01g33761	Gm01:45948913-45964890	14-13-0	14-13-7	OK	4.42745	3.58212	-0.305661	0.498656	0.618022	0.876811	no
Glyma01g33782	Glyma01g33782	Glyma01g33782	Gm01:45948913-45964890	14-13-0	14-13-7	NOTEST	0	0	0	0	1	1	no
Glyma01g33803	Glyma01g33803	Glyma01g33803	Gm01:45990835-45994797	14-13-0	14-13-7	NOTEST	0	0	0	0	1	1	no
Glyma01g33824	Glyma01g33824	Glyma01g33824	Gm01:46002247-46005198	14-13-0	14-13-7	NOTEST	0	0	0	0	1	1	no
Glyma01g33845	Glyma01g33845	Glyma01g33845	Gm01:46007636-46011913	14-13-0	14-13-7	NOTEST	0	0.00847341	1.79769e+308	1.79769e+308	0.272654	1	no
Glyma01g33866	Glyma01g33866	Glyma01g33866	Gm01:46043835-46074615	14-13-0	14-13-7	OK	5.22808	5.45298	0.0607658	-0.102529	0.918337	0.982912	no
Glyma01g33888	Glyma01g33888	Glyma01g33888	Gm01:46096266-46097858	14-13-0	14-13-7	NOTEST	0	0	0	0	1	1	no
Glyma01g33910	Glyma01g33910	Glyma01g33910	Gm01:46103382-46104985	14-13-0	14-13-7	NOTEST	0.160073	0.085269	-0.908636	0.709411	0.47807	1	no
Glyma01g33920	Glyma01g33920	Glyma01g33920	Gm01:46115248-46117119	14-13-0	14-13-7	NOTEST	0	0	0	0	1	1	no
Glyma01g33960	Glyma01g33960	Glyma01g33960	Gm01:46237540-46239330	14-13-0	14-13-7	NOTEST	0	0	0	0	1	1	no
Glyma01g33986	Glyma01g33986	Glyma01g33986	Gm01:46305207-46307924	14-13-0	14-13-7	NOTEST	0	0	0	0	1	1	no
Glyma01g34013	Glyma01g34013	Glyma01g34013	Gm01:46321601-46322033	14-13-0	14-13-7	NOTEST	0	0	0	0	1	1	no
Glyma01g34040	Glyma01g34040	Glyma01g34040	Gm01:46325425-46325842	14-13-0	14-13-7	NOTEST	0	0	0	0	1	1	no
Glyma01g34060	Glyma01g34060	Glyma01g34060	Gm01:46360579-46360996	14-13-0	14-13-7	NOTEST	0	0	0	0	1	1	no
Glyma01g34111	Glyma01g34111	Glyma01g34111	Gm01:46405622-46406054	14-13-0	14-13-7	NOTEST	0	0	0	0	1	1	no
Glyma01g34160	Glyma01g34160	Glyma01g34160	Gm01:46426795-46427518	14-13-0	14-13-7	NOTEST	0	0	0	0	1	1	no
Glyma01g34180	Glyma01g34180	Glyma01g34180	Gm01:46434724-46435093	14-13-0	14-13-7	NOTEST	0	0	0	0	1	1	no
Glyma01g34210	Glyma01g34210	Glyma01g34210	Gm01:46467747-46468471	14-13-0	14-13-7	NOTEST	0	0	0	0	1	1	no
Glyma01g34223	Glyma01g34223	Glyma01g34223	Gm01:46519589-46520799	14-13-0	14-13-7	NOTEST	0	0	0	0	1	1	no
Glyma01g34236	Glyma01g34236	Glyma01g34236	Gm01:46527137-46531737	14-13-0	14-13-7	OK	0.606766	0.487577	-0.31551	0.343203	0.731446	0.921896	no
Glyma01g34250	Glyma01g34250	Glyma01g34250	Gm01:46534521-46534953	14-13-0	14-13-7	NOTEST	0	0	0	0	1	1	no
Glyma01g34260	Glyma01g34260	Glyma01g34260	Gm01:46537220-46537655	14-13-0	14-13-7	NOTEST	0	0	0	0	1	1	no
Glyma01g34270	Glyma01g34270	Glyma01g34270	Gm01:46573515-46583536	14-13-0	14-13-7	OK	5.80603	4.72209	-0.298127	0.504829	0.613679	0.875601	no
Glyma01g34300	Glyma01g34300	Glyma01g34300	Gm01:46676161-46677711	14-13-0	14-13-7	OK	271.901	67.0625	-2.0195	2.59174	0.0095492	0.102042	no
Glyma01g34321	Glyma01g34321	Glyma01g34321	Gm01:46693841-46694273	14-13-0	14-13-7	NOTEST	0	0	0	0	1	1	no
Glyma01g34340	Glyma01g34340	Glyma01g34340	Gm01:46707889-46726051	14-13-0	14-13-7	NOTEST	0	0	0	0	1	1	no
Glyma01g34350	Glyma01g34350	Glyma01g34350	Gm01:46731685-46740931	14-13-0	14-13-7	OK	2.75683	2.56074	-0.10645	0.176707	0.859738	0.968497	no
Glyma01g34360	Glyma01g34360	Glyma01g34360	Gm01:46742637-46747004	14-13-0	14-13-7	OK	0.289576	1.10305	1.92948	-1.69456	0.0901597	0.364675	no
Glyma01g34370	Glyma01g34370	Glyma01g34370	Gm01:46749398-46751642	14-13-0	14-13-7	NOTEST	0.115592	0.256527	1.15007	-0.751513	0.452344	1	no
Glyma01g34380	Glyma01g34380	Glyma01g34380	Gm01:46754477-46758976	14-13-0	14-13-7	OK	1.00335	2.59014	1.3682	-1.77146	0.0764849	0.332983	no
Glyma01g34400	Glyma01g34400	Glyma01g34400	Gm01:46763231-46763483	14-13-0	14-13-7	OK	18.0994	0	-1.79769e+308	-1.79769e+308	0.0175048	0.144754	no
Glyma01g34410	Glyma01g34410	Glyma01g34410	Gm01:46764767-46772182	14-13-0	14-13-7	OK	2.12343	4.05564	0.933535	-1.3388	0.180636	0.521642	no
Glyma01g34420	Glyma01g34420	Glyma01g34420	Gm01:46787052-46789561	14-13-0	14-13-7	NOTEST	0	0	0	0	1	1	no
Glyma01g34443	Glyma01g34443	Glyma01g34443	Gm01:46808690-46811728	14-13-0	14-13-7	NOTEST	0	0	0	0	1	1	no
Glyma01g34466	Glyma01g34466	Glyma01g34466	Gm01:46825911-46827713	14-13-0	14-13-7	NOTEST	0	0	0	0	1	1	no
Glyma01g34490	Glyma01g34490	Glyma01g34490	Gm01:46835873-46838757	14-13-0	14-13-7	NOTEST	0.0643059	0.0344553	-0.900225	0.429342	0.667675	1	no
Glyma01g34506	Glyma01g34506	Glyma01g34506	Gm01:46869789-46881811	14-13-0	14-13-7	OK	1.28297	2.57861	1.00711	-1.49953	0.133737	0.446599	no
Glyma01g34523	Glyma01g34523	Glyma01g34523	Gm01:46869789-46881811	14-13-0	14-13-7	NOTEST	0.0910859	0	-1.79769e+308	-1.79769e+308	0.361673	1	no
Glyma01g34540	Glyma01g34540	Glyma01g34540	Gm01:46906412-46911701	14-13-0	14-13-7	NOTEST	0.168127	0.177782	0.0805631	-0.0732757	0.941587	1	no
Glyma01g34560	Glyma01g34560	Glyma01g34560	Gm01:46925228-46938022	14-13-0	14-13-7	OK	1.37749	2.78246	1.01432	-1.49412	0.135145	0.448919	no
Glyma01g34570	Glyma01g34570	Glyma01g34570	Gm01:46940993-46942519	14-13-0	14-13-7	NOTEST	0.0220621	0.186487	3.07943	-1.60168	0.109226	1	no
Glyma01g34580	Glyma01g34580	Glyma01g34580	Gm01:46987337-46989392	14-13-0	14-13-7	NOTEST	0	0.0233139	1.79769e+308	1.79769e+308	0.196186	1	no
Glyma01g34590	Glyma01g34590	Glyma01g34590	Gm01:46994947-47011742	14-13-0	14-13-7	OK	0.065044	0.435063	2.74174	-2.86938	0.00411273	0.0617226	no
Glyma01g34605	Glyma01g34605	Glyma01g34605	Gm01:47017352-47017572	14-13-0	14-13-7	NOTEST	0	0	0	0	1	1	no
Glyma01g34620	Glyma01g34620	Glyma01g34620	Gm01:47044532-47046263	14-13-0	14-13-7	NOTEST	0	0.242815	1.79769e+308	1.79769e+308	0.0342161	1	no
Glyma01g34630	Glyma01g34630	Glyma01g34630	Gm01:47059946-47069275	14-13-0	14-13-7	OK	11.4194	7.27706	-0.650055	1.0668	0.286062	0.645533	no
Glyma01g34650	Glyma01g34650	Glyma01g34650	Gm01:47081810-47085604	14-13-0	14-13-7	NOTEST	0.126039	0.160789	0.3513	-0.226467	0.820839	1	no
Glyma01g34660	Glyma01g34660	Glyma01g34660	Gm01:47090148-47094163	14-13-0	14-13-7	OK	17.2626	10.9933	-0.651028	1.11829	0.263444	0.622901	no
Glyma01g34671	Glyma01g34671	Glyma01g34671	Gm01:47112164-47117514	14-13-0	14-13-7	NOTEST	0	0	0	0	1	1	no
Glyma01g34680	Glyma01g34680	Glyma01g34680	Gm01:47129774-47133165	14-13-0	14-13-7	OK	2.16365	2.21243	0.0321626	-0.0420458	0.966462	0.993596	no
Glyma01g34690	Glyma01g34690	Glyma01g34690	Gm01:47136977-47141477	14-13-0	14-13-7	OK	6.89039	3.36723	-1.03302	1.62455	0.104259	0.394295	no
Glyma01g34700	Glyma01g34700	Glyma01g34700	Gm01:47141945-47148729	14-13-0	14-13-7	OK	180.444	49.3148	-1.87146	2.0938	0.0362776	0.219843	no
Glyma01g34710	Glyma01g34710	Glyma01g34710	Gm01:47159471-47160816	14-13-0	14-13-7	NOTEST	0	0	0	0	1	1	no
Glyma01g34723	Glyma01g34723	Glyma01g34723	Gm01:47186498-47195065	14-13-0	14-13-7	NOTEST	0	0	0	0	1	1	no
Glyma01g34736	Glyma01g34736	Glyma01g34736	Gm01:47186498-47195065	14-13-0	14-13-7	NOTEST	0.131875	0	-1.79769e+308	-1.79769e+308	0.0668072	1	no
Glyma01g34750	Glyma01g34750	Glyma01g34750	Gm01:47186498-47195065	14-13-0	14-13-7	NOTEST	0	0	0	0	1	1	no
Glyma01g34760	Glyma01g34760	Glyma01g34760	Gm01:47218316-47222203	14-13-0	14-13-7	NOTEST	0	0	0	0	1	1	no
Glyma01g34770	Glyma01g34770	Glyma01g34770	Gm01:47223841-47226695	14-13-0	14-13-7	NOTEST	0	0	0	0	1	1	no
Glyma01g34780	Glyma01g34780	Glyma01g34780	Gm01:47252139-47259720	14-13-0	14-13-7	OK	7.90795	6.01349	-0.395102	0.625405	0.531705	0.832637	no
Glyma01g34791	Glyma01g34791	Glyma01g34791	Gm01:47272202-47272649	14-13-0	14-13-7	NOTEST	0	0	0	0	1	1	no
Glyma01g34800	Glyma01g34800	Glyma01g34800	Gm01:47276056-47279637	14-13-0	14-13-7	NOTEST	0.27904	0.0975897	-1.51567	1.32243	0.186024	1	no
Glyma01g34820	Glyma01g34820	Glyma01g34820	Gm01:47295116-47298579	14-13-0	14-13-7	OK	7.78891	8.92137	0.195844	-0.335406	0.737319	0.924283	no
Glyma01g34830	Glyma01g34830	Glyma01g34830	Gm01:47301280-47303164	14-13-0	14-13-7	NOTEST	0.220713	0.235373	0.0927766	-0.0942335	0.924924	1	no
Glyma01g34840	Glyma01g34840	Glyma01g34840	Gm01:47306519-47315257	14-13-0	14-13-7	OK	4.60434	5.71283	0.311212	-0.530085	0.596053	0.868036	no
Glyma01g34890	Glyma01g34890	Glyma01g34890	Gm01:47380345-47383987	14-13-0	14-13-7	NOTEST	0	0	0	0	1	1	no
Glyma01g34930	Glyma01g34930	Glyma01g34930	Gm01:47416768-47417287	14-13-0	14-13-7	OK	1.04886	1.36465	0.379699	-0.385257	0.700047	0.911474	no
Glyma01g34940	Glyma01g34940	Glyma01g34940	Gm01:47418176-47422790	14-13-0	14-13-7	OK	3.51953	2.6945	-0.385365	0.604613	0.545436	0.840695	no
Glyma01g34950	Glyma01g34950	Glyma01g34950	Gm01:47484620-47488243	14-13-0	14-13-7	NOTEST	0.0592346	0	-1.79769e+308	-1.79769e+308	0.359092	1	no
Glyma01g34960	Glyma01g34960	Glyma01g34960	Gm01:47484620-47488243	14-13-0	14-13-7	OK	0.488815	0.656971	0.426541	-0.5259	0.598958	0.869762	no
Glyma01g34971	Glyma01g34971	Glyma01g34971	Gm01:47509796-47513893	14-13-0	14-13-7	NOTEST	0	0	0	0	1	1	no
Glyma01g34980	Glyma01g34980	Glyma01g34980	Gm01:47515002-47518685	14-13-0	14-13-7	OK	3.09429	0.903087	-1.77667	2.75108	0.00593999	0.0778042	no
Glyma01g34990	Glyma01g34990	Glyma01g34990	Gm01:47519487-47522901	14-13-0	14-13-7	OK	0.655658	0.899646	0.456414	-0.537036	0.591243	0.86608	no
Glyma01g35010	Glyma01g35010	Glyma01g35010	Gm01:47557393-47559050	14-13-0	14-13-7	OK	1.24563	0.473694	-1.39485	1.70129	0.0888887	0.36162	no
Glyma01g35030	Glyma01g35030	Glyma01g35030	Gm01:47605850-47609703	14-13-0	14-13-7	OK	25.7486	14.5888	-0.819639	1.35966	0.173938	0.512848	no
Glyma01g35043	Glyma01g35043	Glyma01g35043	Gm01:47610784-47630469	14-13-0	14-13-7	OK	4.8247	3.71372	-0.377573	0.603719	0.546031	0.840776	no
Glyma01g35056	Glyma01g35056	Glyma01g35056	Gm01:47635648-47638176	14-13-0	14-13-7	NOTEST	0.0778451	0.0578443	-0.428432	0.340535	0.733454	1	no
Glyma01g35070	Glyma01g35070	Glyma01g35070	Gm01:47640057-47641838	14-13-0	14-13-7	NOTEST	0	0	0	0	1	1	no
Glyma01g35083	Glyma01g35083	Glyma01g35083	Gm01:47647068-47659579	14-13-0	14-13-7	OK	4.31296	4.50518	0.0629049	-0.103626	0.917466	0.982741	no
Glyma01g35096	Glyma01g35096	Glyma01g35096	Gm01:47647068-47659579	14-13-0	14-13-7	OK	0.578819	0.602445	0.0577178	-0.03368	0.973132	0.995227	no
Glyma01g35110	Glyma01g35110	Glyma01g35110	Gm01:47674344-47678727	14-13-0	14-13-7	OK	2.04256	3.47529	0.766752	-1.16624	0.243518	0.601036	no
Glyma01g35120	Glyma01g35120	Glyma01g35120	Gm01:47680344-47682544	14-13-0	14-13-7	NOTEST	0	0	0	0	1	1	no
Glyma01g35130	Glyma01g35130	Glyma01g35130	Gm01:47684337-47693236	14-13-0	14-13-7	OK	16.5367	19.4513	0.2342	-0.392925	0.694375	0.909338	no
Glyma01g35145	Glyma01g35145	Glyma01g35145	Gm01:47696213-47700220	14-13-0	14-13-7	OK	2.5628	1.56363	-0.712825	1.07472	0.2825	0.642697	no
Glyma01g35160	Glyma01g35160	Glyma01g35160	Gm01:47703725-47705225	14-13-0	14-13-7	OK	0.585024	0.44102	-0.407653	0.451207	0.651841	0.891531	no
Glyma01g35170	Glyma01g35170	Glyma01g35170	Gm01:47707392-47708756	14-13-0	14-13-7	OK	6.91972	5.77159	-0.261744	0.432106	0.665665	0.897696	no
Glyma01g35180	Glyma01g35180	Glyma01g35180	Gm01:47718336-47725678	14-13-0	14-13-7	NOTEST	0.158457	0.16896	0.0925891	-0.081238	0.935253	1	no
Glyma01g35190	Glyma01g35190	Glyma01g35190	Gm01:47727548-47732948	14-13-0	14-13-7	OK	31.8416	22.7039	-0.487968	0.750336	0.453053	0.785903	no
Glyma01g35201	Glyma01g35201	Glyma01g35201	Gm01:47733363-47734311	14-13-0	14-13-7	OK	4.06763	2.64793	-0.619322	0.558441	0.576543	0.858227	no
Glyma01g35211	Glyma01g35211	Glyma01g35211	Gm01:47738908-47740460	14-13-0	14-13-7	NOTEST	0	0.0258001	1.79769e+308	1.79769e+308	0.196186	1	no
Glyma01g35220	Glyma01g35220	Glyma01g35220	Gm01:47744055-47749293	14-13-0	14-13-7	OK	44.7405	43.0848	-0.0544026	0.0635606	0.94932	0.989455	no
Glyma01g35230	Glyma01g35230	Glyma01g35230	Gm01:47776150-47780905	14-13-0	14-13-7	OK	10.6866	10.4167	-0.036907	0.0645139	0.948561	0.98944	no
Glyma01g35255	Glyma01g35255	Glyma01g35255	Gm01:47796276-47802389	14-13-0	14-13-7	NOTEST	0.0226478	0.108498	2.26022	-1.55318	0.120381	1	no
Glyma01g35280	Glyma01g35280	Glyma01g35280	Gm01:47816224-47821828	14-13-0	14-13-7	OK	85.3426	31.2108	-1.45122	2.19927	0.0278585	0.189761	no
Glyma01g35291	Glyma01g35291	Glyma01g35291	Gm01:47825541-47831516	14-13-0	14-13-7	OK	0.718	1.13352	0.65875	-0.852511	0.39393	0.741937	no
Glyma01g35300	Glyma01g35300	Glyma01g35300	Gm01:47832148-47834125	14-13-0	14-13-7	OK	4.70443	4.10832	-0.195471	0.318673	0.749975	0.928596	no
Glyma01g35310	Glyma01g35310	Glyma01g35310	Gm01:47838176-47839418	14-13-0	14-13-7	NOTEST	0	0.0778602	1.79769e+308	1.79769e+308	0.0692411	1	no
Glyma01g35315	Glyma01g35315	Glyma01g35315	Gm01:47840273-47842107	14-13-0	14-13-7	NOTEST	0	0	0	0	1	1	no
Glyma01g35320	Glyma01g35320	Glyma01g35320	Gm01:47843480-47846444	14-13-0	14-13-7	OK	11.0583	12.3913	0.16419	-0.279223	0.780074	0.941127	no
Glyma01g35330	Glyma01g35330	Glyma01g35330	Gm01:47852135-47854503	14-13-0	14-13-7	OK	4.33675	4.81925	0.152195	-0.264005	0.791776	0.945329	no
Glyma01g35360	Glyma01g35360	Glyma01g35360	Gm01:47868564-47871498	14-13-0	14-13-7	OK	24.2792	18.3061	-0.407394	0.674023	0.500297	0.814005	no
Glyma01g35370	Glyma01g35370	Glyma01g35370	Gm01:47876579-47879048	14-13-0	14-13-7	OK	4.56738	2.73478	-0.739943	1.23165	0.21808	0.568558	no
Glyma01g35381	Glyma01g35381	Glyma01g35381	Gm01:47882778-47885490	14-13-0	14-13-7	OK	9.60232	10.6386	0.147857	-0.239743	0.81053	0.953061	no
Glyma01g35390	Glyma01g35390	Glyma01g35390	Gm01:47891482-47901268	14-13-0	14-13-7	OK	11.4827	11.5643	0.0102197	-0.0169437	0.986482	0.997362	no
Glyma01g35400	Glyma01g35400	Glyma01g35400	Gm01:47904409-47909019	14-13-0	14-13-7	OK	1.1562	1.89071	0.709536	-1.01061	0.312202	0.67125	no
Glyma01g35410	Glyma01g35410	Glyma01g35410	Gm01:47910023-47911708	14-13-0	14-13-7	NOTEST	0.0360588	0.112797	1.6453	-1.10446	0.269395	1	no
Glyma01g35420	Glyma01g35420	Glyma01g35420	Gm01:47912898-47913228	14-13-0	14-13-7	OK	0.532562	0	-1.79769e+308	-1.79769e+308	0.123372	0.428546	no
Glyma01g35430	Glyma01g35430	Glyma01g35430	Gm01:47926149-47931104	14-13-0	14-13-7	NOTEST	0.099244	0.072357	-0.455846	0.374353	0.708142	1	no
Glyma01g35440	Glyma01g35440	Glyma01g35440	Gm01:47932186-47933647	14-13-0	14-13-7	NOTEST	0.134795	0.0952626	-0.500785	0.411258	0.680883	1	no
Glyma01g35450	Glyma01g35450	Glyma01g35450	Gm01:47933912-47939040	14-13-0	14-13-7	OK	19.5041	5.48716	-1.82964	3.06533	0.00217427	0.0414927	yes
Glyma01g35460	Glyma01g35460	Glyma01g35460	Gm01:47946562-47947368	14-13-0	14-13-7	OK	4.49651	10.3319	1.20022	-1.86326	0.0624258	0.297281	no
Glyma01g35470	Glyma01g35470	Glyma01g35470	Gm01:47950106-47953985	14-13-0	14-13-7	OK	1.16916	0.936415	-0.320256	0.377373	0.705896	0.913458	no
Glyma01g35480	Glyma01g35480	Glyma01g35480	Gm01:47964085-47972060	14-13-0	14-13-7	OK	2.73971	3.21343	0.230087	-0.308304	0.757851	0.932539	no
Glyma01g35490	Glyma01g35490	Glyma01g35490	Gm01:47975124-47980649	14-13-0	14-13-7	OK	2.24969	2.94747	0.389752	-0.659249	0.509736	0.81918	no
Glyma01g35500	Glyma01g35500	Glyma01g35500	Gm01:47984869-47990016	14-13-0	14-13-7	OK	0.4378	0.628455	0.521539	-0.632583	0.527006	0.829557	no
Glyma01g35510	Glyma01g35510	Glyma01g35510	Gm01:47990548-47991258	14-13-0	14-13-7	OK	0.451373	0.727802	0.689227	-0.614377	0.538966	0.837095	no
Glyma01g35530	Glyma01g35530	Glyma01g35530	Gm01:48002890-48006714	14-13-0	14-13-7	NOTEST	0.0364812	0.238888	2.71111	-1.89029	0.0587193	1	no
Glyma01g35540	Glyma01g35540	Glyma01g35540	Gm01:48012025-48020478	14-13-0	14-13-7	OK	0.88205	2.66939	1.59758	-2.30792	0.0210034	0.161368	no
Glyma01g35551	Glyma01g35551	Glyma01g35551	Gm01:48045791-48046532	14-13-0	14-13-7	OK	0.432364	0.863125	0.997322	-0.904688	0.36563	0.717589	no
Glyma01g35561	Glyma01g35561	Glyma01g35561	Gm01:48046627-48048949	14-13-0	14-13-7	NOTEST	0	0.203765	1.79769e+308	1.79769e+308	0.0212374	1	no
Glyma01g35570	Glyma01g35570	Glyma01g35570	Gm01:48069521-48070621	14-13-0	14-13-7	OK	2.54585	1.10317	-1.20649	1.45123	0.146717	0.469405	no
Glyma01g35580	Glyma01g35580	Glyma01g35580	Gm01:48077865-48083725	14-13-0	14-13-7	OK	1.40621	1.0264	-0.454219	0.517181	0.60503	0.871554	no
Glyma01g35590	Glyma01g35590	Glyma01g35590	Gm01:48086193-48086883	14-13-0	14-13-7	OK	0.104824	0.741562	2.8226	-1.97541	0.0482218	0.25777	no
Glyma01g35600	Glyma01g35600	Glyma01g35600	Gm01:48088646-48092573	14-13-0	14-13-7	OK	5.0182	3.57527	-0.489115	0.779	0.43598	0.773954	no
Glyma01g35611	Glyma01g35611	Glyma01g35611	Gm01:48106435-48107149	14-13-0	14-13-7	NOTEST	0	0	0	0	1	1	no
Glyma01g35620	Glyma01g35620	Glyma01g35620	Gm01:48132072-48139955	14-13-0	14-13-7	OK	74.4697	30.0506	-1.30926	1.77311	0.0762106	0.332482	no
Glyma01g35630	Glyma01g35630	Glyma01g35630	Gm01:48142117-48144321	14-13-0	14-13-7	OK	0.564776	0.748304	0.405947	-0.465065	0.641885	0.887203	no
Glyma01g35640	Glyma01g35640	Glyma01g35640	Gm01:48145384-48152470	14-13-0	14-13-7	OK	0.828277	0.670405	-0.30508	0.403476	0.686598	0.906459	no
Glyma01g35650	Glyma01g35650	Glyma01g35650	Gm01:48157272-48165868	14-13-0	14-13-7	OK	4.29843	4.80719	0.161384	-0.280451	0.779132	0.940973	no
Glyma01g35660	Glyma01g35660	Glyma01g35660	Gm01:48174704-48177832	14-13-0	14-13-7	OK	0.583417	1.55621	1.41544	-1.88093	0.0599809	0.290417	no
Glyma01g35671	Glyma01g35671	Glyma01g35671	Gm01:48220843-48221643	14-13-0	14-13-7	OK	30.8053	10.7546	-1.51823	2.5169	0.0118392	0.11552	no
Glyma01g35681	Glyma01g35681	Glyma01g35681	Gm01:48221730-48222524	14-13-0	14-13-7	NOTEST	0	0	0	0	1	1	no
Glyma01g35690	Glyma01g35690	Glyma01g35690	Gm01:48227988-48235632	14-13-0	14-13-7	OK	0.798068	1.96385	1.2991	-1.8723	0.0611646	0.293703	no
Glyma01g35700	Glyma01g35700	Glyma01g35700	Gm01:48235761-48238962	14-13-0	14-13-7	NOTEST	0.0966626	0.0515153	-0.907956	0.801797	0.42267	1	no
Glyma01g35711	Glyma01g35711	Glyma01g35711	Gm01:48242478-48244212	14-13-0	14-13-7	NOTEST	0	0	0	0	1	1	no
Glyma01g35720	Glyma01g35720	Glyma01g35720	Gm01:48246126-48248948	14-13-0	14-13-7	NOTEST	0	0	0	0	1	1	no
Glyma01g35730	Glyma01g35730	Glyma01g35730	Gm01:48251598-48253821	14-13-0	14-13-7	OK	1.04132	0.430219	-1.27527	1.36897	0.171008	0.50818	no
Glyma01g35740	Glyma01g35740	Glyma01g35740	Gm01:48256233-48258418	14-13-0	14-13-7	OK	1.61235	0.856243	-0.913069	1.10566	0.268872	0.628519	no
Glyma01g35750	Glyma01g35750	Glyma01g35750	Gm01:48262136-48265375	14-13-0	14-13-7	OK	9.30278	8.23764	-0.17543	0.306538	0.759195	0.933192	no
Glyma01g35780	Glyma01g35780	Glyma01g35780	Gm01:48276784-48278711	14-13-0	14-13-7	OK	11.5051	7.7815	-0.564147	0.904128	0.365928	0.717777	no
Glyma01g35790	Glyma01g35790	Glyma01g35790	Gm01:48279936-48284217	14-13-0	14-13-7	OK	5.99765	5.79062	-0.0506774	0.0881695	0.929742	0.985951	no
Glyma01g35800	Glyma01g35800	Glyma01g35800	Gm01:48289113-48292398	14-13-0	14-13-7	OK	0.844969	1.07726	0.350394	-0.499573	0.617376	0.876791	no
Glyma01g35820	Glyma01g35820	Glyma01g35820	Gm01:48321786-48329293	14-13-0	14-13-7	OK	0.738319	1.08711	0.558179	-0.783534	0.433314	0.771667	no
Glyma01g35830	Glyma01g35830	Glyma01g35830	Gm01:48330613-48331119	14-13-0	14-13-7	NOTEST	0	0	0	0	1	1	no
Glyma01g35840	Glyma01g35840	Glyma01g35840	Gm01:48332060-48333217	14-13-0	14-13-7	OK	1.26422	2.74845	1.12037	-1.44979	0.147117	0.469912	no
Glyma01g35850	Glyma01g35850	Glyma01g35850	Gm01:48334976-48338851	14-13-0	14-13-7	OK	3.61378	5.32619	0.559595	-0.974092	0.330011	0.687348	no
Glyma01g35880	Glyma01g35880	Glyma01g35880	Gm01:48348796-48349428	14-13-0	14-13-7	NOTEST	0	0	0	0	1	1	no
Glyma01g35910	Glyma01g35910	Glyma01g35910	Gm01:48361827-48364787	14-13-0	14-13-7	OK	187.724	411.66	1.13284	-1.18098	0.237612	0.594335	no
Glyma01g35920	Glyma01g35920	Glyma01g35920	Gm01:48373909-48375181	14-13-0	14-13-7	OK	2.99023	1.99025	-0.587309	0.850036	0.395305	0.742819	no
Glyma01g35931	Glyma01g35931	Glyma01g35931	Gm01:48376295-48378301	14-13-0	14-13-7	NOTEST	0	0.201333	1.79769e+308	1.79769e+308	0.196186	1	no
Glyma01g35940	Glyma01g35940	Glyma01g35940	Gm01:48378830-48383355	14-13-0	14-13-7	OK	1.45963	3.116	1.09409	-1.7707	0.0766102	0.333149	no
Glyma01g35950	Glyma01g35950	Glyma01g35950	Gm01:48392038-48401536	14-13-0	14-13-7	OK	2.24156	2.90445	0.373763	-0.65057	0.515324	0.823327	no
Glyma01g35960	Glyma01g35960	Glyma01g35960	Gm01:48412616-48415065	14-13-0	14-13-7	NOTEST	0	0.0268868	1.79769e+308	1.79769e+308	0.196186	1	no
Glyma01g35970	Glyma01g35970	Glyma01g35970	Gm01:48419129-48422033	14-13-0	14-13-7	NOTEST	0	0	0	0	1	1	no
Glyma01g35980	Glyma01g35980	Glyma01g35980	Gm01:48422961-48427391	14-13-0	14-13-7	OK	0.493766	1.4964	1.59959	-2.23159	0.0256421	0.180831	no
Glyma01g35990	Glyma01g35990	Glyma01g35990	Gm01:48439916-48441659	14-13-0	14-13-7	OK	3.36141	3.26625	-0.0414299	0.0644175	0.948638	0.98944	no
Glyma01g36000	Glyma01g36000	Glyma01g36000	Gm01:48442886-48447854	14-13-0	14-13-7	OK	1.34867	2.21733	0.717285	-1.15297	0.248924	0.607719	no
Glyma01g36011	Glyma01g36011	Glyma01g36011	Gm01:48469240-48475758	14-13-0	14-13-7	OK	1.64152	3.11391	0.923691	-1.38607	0.165724	0.500464	no
Glyma01g36021	Glyma01g36021	Glyma01g36021	Gm01:48476497-48478317	14-13-0	14-13-7	NOTEST	0	0	0	0	1	1	no
Glyma01g36030	Glyma01g36030	Glyma01g36030	Gm01:48481465-48486456	14-13-0	14-13-7	OK	7.52342	4.07643	-0.884082	1.37806	0.168185	0.504586	no
Glyma01g36040	Glyma01g36040	Glyma01g36040	Gm01:48503695-48509106	14-13-0	14-13-7	OK	1.8193	3.17598	0.803813	-1.30671	0.191312	0.536588	no
Glyma01g36050	Glyma01g36050	Glyma01g36050	Gm01:48515192-48516090	14-13-0	14-13-7	NOTEST	0.0802125	0.16376	1.02968	-0.672844	0.501047	1	no
Glyma01g36070	Glyma01g36070	Glyma01g36070	Gm01:48524087-48529043	14-13-0	14-13-7	OK	13.2094	7.13269	-0.889047	1.52211	0.127981	0.436863	no
Glyma01g36080	Glyma01g36080	Glyma01g36080	Gm01:48537766-48542585	14-13-0	14-13-7	OK	1.66268	2.80352	0.753727	-1.21124	0.225802	0.57868	no
Glyma01g36091	Glyma01g36091	Glyma01g36091	Gm01:48559460-48570512	14-13-0	14-13-7	OK	0.199238	0.723754	1.86101	-1.95607	0.0504571	0.265222	no
Glyma01g36101	Glyma01g36101	Glyma01g36101	Gm01:48579414-48580534	14-13-0	14-13-7	NOTEST	0	0	0	0	1	1	no
Glyma01g36110	Glyma01g36110	Glyma01g36110	Gm01:48584816-48588333	14-13-0	14-13-7	OK	5.58753	9.96624	0.834838	-1.41623	0.156709	0.485352	no
Glyma01g36120	Glyma01g36120	Glyma01g36120	Gm01:48599418-48603933	14-13-0	14-13-7	OK	4.07869	1.56691	-1.38018	2.0337	0.0419823	0.238487	no
Glyma01g36130	Glyma01g36130	Glyma01g36130	Gm01:48622283-48624709	14-13-0	14-13-7	NOTEST	0	0	0	0	1	1	no
Glyma01g36145	Glyma01g36145	Glyma01g36145	Gm01:48632045-48636339	14-13-0	14-13-7	OK	1.14002	2.48907	1.12655	-1.55398	0.12019	0.424339	no
Glyma01g36160	Glyma01g36160	Glyma01g36160	Gm01:48651554-48653174	14-13-0	14-13-7	OK	5.23103	10.9828	1.07008	-1.84547	0.0649689	0.304087	no
Glyma01g36170	Glyma01g36170	Glyma01g36170	Gm01:48661585-48668062	14-13-0	14-13-7	OK	3.28017	4.39827	0.423167	-0.726708	0.467405	0.795084	no
Glyma01g36180	Glyma01g36180	Glyma01g36180	Gm01:48677503-48687090	14-13-0	14-13-7	OK	2.16865	2.22321	0.0358445	-0.0480478	0.961678	0.992422	no
Glyma01g36190	Glyma01g36190	Glyma01g36190	Gm01:48690497-48697620	14-13-0	14-13-7	NOTEST	0	0.0198314	1.79769e+308	1.79769e+308	0.2967	1	no
Glyma01g36200	Glyma01g36200	Glyma01g36200	Gm01:48703010-48710116	14-13-0	14-13-7	OK	7.58629	5.63713	-0.428433	0.734769	0.46248	0.791786	no
Glyma01g36210	Glyma01g36210	Glyma01g36210	Gm01:48710853-48716254	14-13-0	14-13-7	OK	26.6667	19.798	-0.429685	0.585886	0.557952	0.847137	no
Glyma01g36225	Glyma01g36225	Glyma01g36225	Gm01:48732011-48735191	14-13-0	14-13-7	OK	0.805422	0.340591	-1.2417	1.46664	0.142474	0.462579	no
Glyma01g36240	Glyma01g36240	Glyma01g36240	Gm01:48735796-48738228	14-13-0	14-13-7	NOTEST	0.287641	0.351539	0.289416	-0.328513	0.742524	1	no
Glyma01g36250	Glyma01g36250	Glyma01g36250	Gm01:48740116-48740919	14-13-0	14-13-7	OK	0.784794	1.16299	0.567454	-0.556769	0.577685	0.858502	no
Glyma01g36260	Glyma01g36260	Glyma01g36260	Gm01:48742924-48747330	14-13-0	14-13-7	OK	0.913077	1.37233	0.587824	-0.839913	0.400957	0.746536	no
Glyma01g36270	Glyma01g36270	Glyma01g36270	Gm01:48751691-48754081	14-13-0	14-13-7	OK	6.9242	4.04281	-0.776288	1.34536	0.178509	0.51866	no
Glyma01g36280	Glyma01g36280	Glyma01g36280	Gm01:48755468-48766262	14-13-0	14-13-7	OK	1.51641	2.44825	0.691088	-1.17147	0.24141	0.598844	no
Glyma01g36290	Glyma01g36290	Glyma01g36290	Gm01:48768219-48769858	14-13-0	14-13-7	OK	3.65141	5.09429	0.480427	-0.637885	0.523548	0.827336	no
Glyma01g36301	Glyma01g36301	Glyma01g36301	Gm01:48784769-48791019	14-13-0	14-13-7	OK	0.227351	1.69964	2.90223	-3.75298	0.000174747	0.00709083	yes
Glyma01g36311	Glyma01g36311	Glyma01g36311	Gm01:48803722-48809885	14-13-0	14-13-7	NOTEST	0	0.0690075	1.79769e+308	1.79769e+308	0.0692411	1	no
Glyma01g36320	Glyma01g36320	Glyma01g36320	Gm01:48810062-48812413	14-13-0	14-13-7	OK	5.38523	5.6907	0.0795992	-0.114029	0.909215	0.980897	no
Glyma01g36330	Glyma01g36330	Glyma01g36330	Gm01:48812789-48816606	14-13-0	14-13-7	NOTEST	0	0	0	0	1	1	no
Glyma01g36340	Glyma01g36340	Glyma01g36340	Gm01:48817174-48822812	14-13-0	14-13-7	OK	5.21501	5.42814	0.0577898	-0.10094	0.919598	0.983182	no
Glyma01g36350	Glyma01g36350	Glyma01g36350	Gm01:48822940-48825606	14-13-0	14-13-7	OK	0.582974	0.233337	-1.32101	1.54301	0.122829	0.428546	no
Glyma01g36360	Glyma01g36360	Glyma01g36360	Gm01:48830588-48836103	14-13-0	14-13-7	OK	0.0356007	0.526679	3.88695	-2.80169	0.00508362	0.0708582	no
Glyma01g36375	Glyma01g36375	Glyma01g36375	Gm01:48848060-48848643	14-13-0	14-13-7	NOTEST	0	0	0	0	1	1	no
Glyma01g36390	Glyma01g36390	Glyma01g36390	Gm01:48865791-48875859	14-13-0	14-13-7	OK	1.1441	1.98754	0.796771	-1.21855	0.223014	0.575129	no
Glyma01g36410	Glyma01g36410	Glyma01g36410	Gm01:48903092-48909719	14-13-0	14-13-7	OK	19.2021	15.753	-0.28564	0.452205	0.651121	0.891162	no
Glyma01g36420	Glyma01g36420	Glyma01g36420	Gm01:48925196-48933027	14-13-0	14-13-7	OK	1.34166	0.891436	-0.589821	0.742417	0.457835	0.789483	no
Glyma01g36430	Glyma01g36430	Glyma01g36430	Gm01:48939588-48943055	14-13-0	14-13-7	OK	0.6748	0.159117	-2.08438	2.20437	0.0274984	0.188375	no
Glyma01g36440	Glyma01g36440	Glyma01g36440	Gm01:48945635-48947617	14-13-0	14-13-7	OK	14.2088	9.81899	-0.533139	0.89542	0.370563	0.722386	no
Glyma01g36450	Glyma01g36450	Glyma01g36450	Gm01:48961667-48971891	14-13-0	14-13-7	OK	4.06099	4.59117	0.177031	-0.306437	0.759272	0.933192	no
Glyma01g36460	Glyma01g36460	Glyma01g36460	Gm01:48974134-48978029	14-13-0	14-13-7	NOTEST	0	0	0	0	1	1	no
Glyma01g36480	Glyma01g36480	Glyma01g36480	Gm01:48987938-48990441	14-13-0	14-13-7	OK	3.28389	21.8216	2.73228	-4.3348	1.45895e-05	0.00105146	yes
Glyma01g36490	Glyma01g36490	Glyma01g36490	Gm01:48994357-48995257	14-13-0	14-13-7	NOTEST	0	0	0	0	1	1	no
Glyma01g36500	Glyma01g36500	Glyma01g36500	Gm01:48997060-49003679	14-13-0	14-13-7	OK	0.368795	0.402716	0.126946	-0.155089	0.876751	0.972429	no
Glyma01g36510	Glyma01g36510	Glyma01g36510	Gm01:49007099-49008173	14-13-0	14-13-7	NOTEST	0	0.106295	1.79769e+308	1.79769e+308	0.0692411	1	no
Glyma01g36520	Glyma01g36520	Glyma01g36520	Gm01:49010426-49011305	14-13-0	14-13-7	NOTEST	0	0	0	0	1	1	no
Glyma01g36530	Glyma01g36530	Glyma01g36530	Gm01:49013986-49014688	14-13-0	14-13-7	NOTEST	0	0	0	0	1	1	no
Glyma01g36545	Glyma01g36545	Glyma01g36545	Gm01:49022248-49027494	14-13-0	14-13-7	NOTEST	0	0	0	0	1	1	no
Glyma01g36560	Glyma01g36560	Glyma01g36560	Gm01:49029694-49030771	14-13-0	14-13-7	NOTEST	0	0	0	0	1	1	no
Glyma01g36570	Glyma01g36570	Glyma01g36570	Gm01:49038832-49039771	14-13-0	14-13-7	OK	0.552651	0.328723	-0.749497	0.73686	0.461207	0.791223	no
Glyma01g36580	Glyma01g36580	Glyma01g36580	Gm01:49043808-49044992	14-13-0	14-13-7	NOTEST	0	0	0	0	1	1	no
Glyma01g36590	Glyma01g36590	Glyma01g36590	Gm01:49051914-49056921	14-13-0	14-13-7	OK	0.419782	1.6024	1.93252	-2.5477	0.0108434	0.109925	no
Glyma01g36600	Glyma01g36600	Glyma01g36600	Gm01:49064175-49066310	14-13-0	14-13-7	OK	2.1313	7.59737	1.83376	-2.81664	0.00485292	0.0687244	no
Glyma01g36606	Glyma01g36606	Glyma01g36606	Gm01:49068914-49070036	14-13-0	14-13-7	OK	0.530312	1.81318	1.77361	-2.11365	0.0345456	0.214026	no
Glyma01g36613	Glyma01g36613	Glyma01g36613	Gm01:49070073-49072214	14-13-0	14-13-7	OK	0.815589	1.48416	0.863729	-1.05792	0.290093	0.649212	no
Glyma01g36620	Glyma01g36620	Glyma01g36620	Gm01:49074667-49077300	14-13-0	14-13-7	OK	155.237	280.279	0.852388	-1.10686	0.268355	0.627855	no
Glyma01g36630	Glyma01g36630	Glyma01g36630	Gm01:49084944-49093758	14-13-0	14-13-7	OK	2.43307	4.30838	0.824366	-1.33888	0.180611	0.521642	no
Glyma01g36638	Glyma01g36638	Glyma01g36638	Gm01:49107386-49109822	14-13-0	14-13-7	OK	4.76776	11.2619	1.24007	-2.00063	0.0454318	0.249777	no
Glyma01g36646	Glyma01g36646	Glyma01g36646	Gm01:49109982-49111565	14-13-0	14-13-7	OK	3.3169	5.68921	0.778394	-0.989421	0.322457	0.680768	no
Glyma01g36654	Glyma01g36654	Glyma01g36654	Gm01:49113570-49119201	14-13-0	14-13-7	OK	2.02364	3.82643	0.919047	-0.9877	0.3233	0.681407	no
Glyma01g36662	Glyma01g36662	Glyma01g36662	Gm01:49119339-49122865	14-13-0	14-13-7	OK	26.8746	12.9393	-1.05448	1.685	0.0919892	0.368511	no
Glyma01g36670	Glyma01g36670	Glyma01g36670	Gm01:49124364-49127508	14-13-0	14-13-7	OK	7.3762	12.6563	0.778901	-1.14984	0.250209	0.608801	no
Glyma01g36680	Glyma01g36680	Glyma01g36680	Gm01:49129327-49137766	14-13-0	14-13-7	OK	3.73938	3.36888	-0.150529	0.258455	0.796056	0.9473	no
Glyma01g36691	Glyma01g36691	Glyma01g36691	Gm01:49144740-49145859	14-13-0	14-13-7	NOTEST	0	0	0	0	1	1	no
Glyma01g36700	Glyma01g36700	Glyma01g36700	Gm01:49146933-49155639	14-13-0	14-13-7	OK	9.13034	11.9287	0.385694	-0.519027	0.603742	0.871014	no
Glyma01g36711	Glyma01g36711	Glyma01g36711	Gm01:49159187-49159524	14-13-0	14-13-7	NOTEST	0	0	0	0	1	1	no
Glyma01g36720	Glyma01g36720	Glyma01g36720	Gm01:49164706-49167830	14-13-0	14-13-7	OK	1.07063	2.09179	0.966284	-1.20499	0.228205	0.581466	no
Glyma01g36730	Glyma01g36730	Glyma01g36730	Gm01:49171301-49172211	14-13-0	14-13-7	OK	1.60834	0.416909	-1.94777	2.0872	0.0368697	0.221834	no
Glyma01g36740	Glyma01g36740	Glyma01g36740	Gm01:49175886-49179312	14-13-0	14-13-7	OK	11.2646	8.77304	-0.360642	0.629664	0.528914	0.830859	no
Glyma01g36750	Glyma01g36750	Glyma01g36750	Gm01:49180569-49188788	14-13-0	14-13-7	OK	9.63265	19.03	0.982271	-1.53841	0.123948	0.429775	no
Glyma01g36760	Glyma01g36760	Glyma01g36760	Gm01:49196842-49199569	14-13-0	14-13-7	OK	3.63363	2.4349	-0.577549	0.74062	0.458924	0.790063	no
Glyma01g36770	Glyma01g36770	Glyma01g36770	Gm01:49207142-49211246	14-13-0	14-13-7	OK	3.34358	6.37338	0.930667	-1.53203	0.125516	0.432771	no
Glyma01g36780	Glyma01g36780	Glyma01g36780	Gm01:49213870-49215923	14-13-0	14-13-7	OK	5.75535	9.27651	0.688678	-1.10113	0.270842	0.630646	no
Glyma01g36790	Glyma01g36790	Glyma01g36790	Gm01:49215924-49218539	14-13-0	14-13-7	OK	5.66435	3.26348	-0.7955	1.03377	0.301244	0.660746	no
Glyma01g36801	Glyma01g36801	Glyma01g36801	Gm01:49220679-49225998	14-13-0	14-13-7	OK	3.92039	4.01868	0.0357229	-0.0623816	0.950259	0.989633	no
Glyma01g36810	Glyma01g36810	Glyma01g36810	Gm01:49235149-49235590	14-13-0	14-13-7	NOTEST	0	0	0	0	1	1	no
Glyma01g36820	Glyma01g36820	Glyma01g36820	Gm01:49253297-49254542	14-13-0	14-13-7	NOTEST	0.0744646	0.115876	0.637956	-0.403502	0.686579	1	no
Glyma01g36831	Glyma01g36831	Glyma01g36831	Gm01:49256521-49258723	14-13-0	14-13-7	OK	2.01642	1.18176	-0.770859	1.02993	0.303043	0.662346	no
Glyma01g36840	Glyma01g36840	Glyma01g36840	Gm01:49263069-49265363	14-13-0	14-13-7	OK	3.54229	2.07156	-0.773968	1.28769	0.197853	0.542867	no
Glyma01g36850	Glyma01g36850	Glyma01g36850	Gm01:49266433-49268941	14-13-0	14-13-7	OK	89.6132	64.9632	-0.46409	0.682486	0.494932	0.811593	no
Glyma01g36860	Glyma01g36860	Glyma01g36860	Gm01:49271742-49278414	14-13-0	14-13-7	OK	2.73879	6.33881	1.21067	-1.91665	0.0552822	0.277853	no
Glyma01g36870	Glyma01g36870	Glyma01g36870	Gm01:49289720-49299050	14-13-0	14-13-7	OK	4.95966	7.66095	0.627281	-1.07743	0.281288	0.641351	no
Glyma01g36880	Glyma01g36880	Glyma01g36880	Gm01:49300170-49302868	14-13-0	14-13-7	OK	16.1383	15.3507	-0.0721849	0.111998	0.910825	0.981329	no
Glyma01g36890	Glyma01g36890	Glyma01g36890	Gm01:49306067-49309782	14-13-0	14-13-7	OK	63.0518	24.4065	-1.36927	2.05712	0.0396743	0.231341	no
Glyma01g36900	Glyma01g36900	Glyma01g36900	Gm01:49311611-49314379	14-13-0	14-13-7	OK	0.171995	0.416574	1.2762	-1.1736	0.240555	0.597724	no
Glyma01g36920	Glyma01g36920	Glyma01g36920	Gm01:49322909-49327222	14-13-0	14-13-7	NOTEST	0	0.0428628	1.79769e+308	1.79769e+308	0.0523416	1	no
Glyma01g36931	Glyma01g36931	Glyma01g36931	Gm01:49327330-49331955	14-13-0	14-13-7	NOTEST	0	0.0970717	1.79769e+308	1.79769e+308	0.113214	1	no
Glyma01g36940	Glyma01g36940	Glyma01g36940	Gm01:49334742-49338803	14-13-0	14-13-7	OK	0.372473	1.12923	1.60013	-1.76981	0.0767593	0.333428	no
Glyma01g36950	Glyma01g36950	Glyma01g36950	Gm01:49340202-49347954	14-13-0	14-13-7	OK	0.580966	0.0873976	-2.73279	3.1511	0.00162659	0.0342379	yes
Glyma01g36960	Glyma01g36960	Glyma01g36960	Gm01:49357372-49363143	14-13-0	14-13-7	OK	3.10728	5.88477	0.921335	-1.57666	0.114874	0.414713	no
Glyma01g36980	Glyma01g36980	Glyma01g36980	Gm01:49366425-49374835	14-13-0	14-13-7	NOTEST	0	0	0	0	1	1	no
Glyma01g36990	Glyma01g36990	Glyma01g36990	Gm01:49378227-49384148	14-13-0	14-13-7	OK	13.2467	7.91559	-0.742868	1.21431	0.22463	0.576701	no
Glyma01g37000	Glyma01g37000	Glyma01g37000	Gm01:49386620-49392224	14-13-0	14-13-7	NOTEST	0.0948165	0.179817	0.923318	-0.769278	0.441728	1	no
Glyma01g37010	Glyma01g37010	Glyma01g37010	Gm01:49392804-49394717	14-13-0	14-13-7	OK	15.2927	3.24892	-2.23482	3.59744	0.000321365	0.0110632	yes
Glyma01g37020	Glyma01g37020	Glyma01g37020	Gm01:49402192-49404630	14-13-0	14-13-7	OK	12.8861	10.2232	-0.333968	0.570264	0.568499	0.853804	no
Glyma01g37031	Glyma01g37031	Glyma01g37031	Gm01:49405105-49407262	14-13-0	14-13-7	NOTEST	0	0.0647607	1.79769e+308	1.79769e+308	0.113214	1	no
Glyma01g37040	Glyma01g37040	Glyma01g37040	Gm01:49421021-49423263	14-13-0	14-13-7	OK	0.409772	0.365002	-0.166918	0.183435	0.854457	0.967048	no
Glyma01g37051	Glyma01g37051	Glyma01g37051	Gm01:49432478-49435070	14-13-0	14-13-7	NOTEST	0	0	0	0	1	1	no
Glyma01g37060	Glyma01g37060	Glyma01g37060	Gm01:49439171-49440019	14-13-0	14-13-7	NOTEST	0	0	0	0	1	1	no
Glyma01g37080	Glyma01g37080	Glyma01g37080	Gm01:49455121-49457778	14-13-0	14-13-7	OK	3.73476	2.09306	-0.835401	1.42552	0.154007	0.481322	no
Glyma01g37090	Glyma01g37090	Glyma01g37090	Gm01:49471613-49473084	14-13-0	14-13-7	OK	15.1038	33.1123	1.13246	-1.8645	0.0622521	0.296819	no
Glyma01g37100	Glyma01g37100	Glyma01g37100	Gm01:49482623-49488331	14-13-0	14-13-7	OK	2.0677	2.25616	0.12584	-0.195155	0.845271	0.964083	no
Glyma01g37120	Glyma01g37120	Glyma01g37120	Gm01:49513343-49516212	14-13-0	14-13-7	NOTEST	0	0	0	0	1	1	no
Glyma01g37130	Glyma01g37130	Glyma01g37130	Gm01:49518056-49520062	14-13-0	14-13-7	NOTEST	0.0455076	0.0981471	1.10884	-0.724568	0.468717	1	no
Glyma01g37136	Glyma01g37136	Glyma01g37136	Gm01:49520615-49552178	14-13-0	14-13-7	OK	3.51184	5.10845	0.540659	-0.831133	0.405898	0.750602	no
Glyma01g37143	Glyma01g37143	Glyma01g37143	Gm01:49520615-49552178	14-13-0	14-13-7	NOTEST	0.114971	0.061532	-0.901864	0.0361727	0.971145	1	no
Glyma01g37150	Glyma01g37150	Glyma01g37150	Gm01:49557207-49558582	14-13-0	14-13-7	NOTEST	0.0520169	0.086008	0.725491	-0.458868	0.646329	1	no
Glyma01g37160	Glyma01g37160	Glyma01g37160	Gm01:49559523-49562407	14-13-0	14-13-7	OK	5.27263	3.00108	-0.813042	1.32181	0.186231	0.529414	no
Glyma01g37180	Glyma01g37180	Glyma01g37180	Gm01:49563492-49567476	14-13-0	14-13-7	OK	5.07738	4.73372	-0.101112	0.172361	0.863154	0.969309	no
Glyma01g37190	Glyma01g37190	Glyma01g37190	Gm01:49585069-49586870	14-13-0	14-13-7	NOTEST	0	0	0	0	1	1	no
Glyma01g37200	Glyma01g37200	Glyma01g37200	Gm01:49597448-49598567	14-13-0	14-13-7	NOTEST	0	0.0522121	1.79769e+308	1.79769e+308	0.196186	1	no
Glyma01g37215	Glyma01g37215	Glyma01g37215	Gm01:49610632-49612072	14-13-0	14-13-7	NOTEST	0	0.0250992	1.79769e+308	1.79769e+308	0.232212	1	no
Glyma01g37230	Glyma01g37230	Glyma01g37230	Gm01:49610632-49612072	14-13-0	14-13-7	NOTEST	0	0	0	0	1	1	no
Glyma01g37240	Glyma01g37240	Glyma01g37240	Gm01:49616496-49621295	14-13-0	14-13-7	OK	0.391271	0.132249	-1.56491	1.70444	0.0882988	0.360148	no
Glyma01g37250	Glyma01g37250	Glyma01g37250	Gm01:49624839-49626433	14-13-0	14-13-7	OK	139.098	33.3891	-2.05865	2.93676	0.00331659	0.0543776	no
Glyma01g37270	Glyma01g37270	Glyma01g37270	Gm01:49637622-49639519	14-13-0	14-13-7	OK	26.1527	29.4004	0.168875	-0.258144	0.796296	0.947484	no
Glyma01g37290	Glyma01g37290	Glyma01g37290	Gm01:49639992-49643961	14-13-0	14-13-7	OK	4.89391	5.68283	0.215623	-0.264834	0.791137	0.945085	no
Glyma01g37296	Glyma01g37296	Glyma01g37296	Gm01:49646115-49646903	14-13-0	14-13-7	OK	84.4836	256.373	1.6015	-2.71588	0.00660996	0.0832114	no
Glyma01g37303	Glyma01g37303	Glyma01g37303	Gm01:49646973-49647556	14-13-0	14-13-7	OK	0.482153	0.530565	0.138039	-0.108776	0.91338	0.981749	no
Glyma01g37310	Glyma01g37310	Glyma01g37310	Gm01:49651805-49656854	14-13-0	14-13-7	OK	0.390258	0.305327	-0.354075	0.373819	0.708539	0.914312	no
Glyma01g37320	Glyma01g37320	Glyma01g37320	Gm01:49680382-49682445	14-13-0	14-13-7	OK	21.7159	15.0295	-0.53095	0.9185	0.358357	0.711819	no
Glyma01g37330	Glyma01g37330	Glyma01g37330	Gm01:49688213-49691604	14-13-0	14-13-7	NOTEST	0.113177	0.079957	-0.501279	0.474345	0.635254	1	no
Glyma01g37341	Glyma01g37341	Glyma01g37341	Gm01:49698283-49706430	14-13-0	14-13-7	OK	7.00586	4.56591	-0.617659	0.949519	0.342357	0.698483	no
Glyma01g37350	Glyma01g37350	Glyma01g37350	Gm01:49711599-49713520	14-13-0	14-13-7	NOTEST	0	0	0	0	1	1	no
Glyma01g37360	Glyma01g37360	Glyma01g37360	Gm01:49721188-49723541	14-13-0	14-13-7	OK	1.37312	7.87805	2.52038	-3.46371	0.000532772	0.0159209	yes
Glyma01g37370	Glyma01g37370	Glyma01g37370	Gm01:49725132-49728656	14-13-0	14-13-7	OK	42.7804	10.8442	-1.98003	3.19618	0.00139262	0.0307174	yes
Glyma01g37380	Glyma01g37380	Glyma01g37380	Gm01:49736248-49744811	14-13-0	14-13-7	OK	4.21905	3.66383	-0.203567	0.336978	0.736134	0.923756	no
Glyma01g37393	Glyma01g37393	Glyma01g37393	Gm01:49755262-49762118	14-13-0	14-13-7	OK	4.641	4.67315	0.00995948	-0.016909	0.986509	0.997362	no
Glyma01g37406	Glyma01g37406	Glyma01g37406	Gm01:49766181-49770448	14-13-0	14-13-7	OK	4.32881	4.22042	-0.0365845	0.060837	0.951489	0.989949	no
Glyma01g37420	Glyma01g37420	Glyma01g37420	Gm01:49772165-49778547	14-13-0	14-13-7	OK	1.4227	1.4581	0.0354533	-0.0557195	0.955565	0.990881	no
Glyma01g37430	Glyma01g37430	Glyma01g37430	Gm01:49781351-49784822	14-13-0	14-13-7	OK	0.218209	0.813574	1.89856	-2.23251	0.0255811	0.180631	no
Glyma01g37440	Glyma01g37440	Glyma01g37440	Gm01:49804689-49806831	14-13-0	14-13-7	NOTEST	0	0	0	0	1	1	no
Glyma01g37450	Glyma01g37450	Glyma01g37450	Gm01:49804689-49806831	14-13-0	14-13-7	OK	2.88775	3.09112	0.098181	-0.160891	0.87218	0.971327	no
Glyma01g37460	Glyma01g37460	Glyma01g37460	Gm01:49816977-49818918	14-13-0	14-13-7	OK	8.11724	5.92692	-0.453705	0.78926	0.42996	0.769532	no
Glyma01g37470	Glyma01g37470	Glyma01g37470	Gm01:49821773-49824393	14-13-0	14-13-7	NOTEST	0	0.0268556	1.79769e+308	1.79769e+308	0.300971	1	no
Glyma01g37480	Glyma01g37480	Glyma01g37480	Gm01:49830529-49834966	14-13-0	14-13-7	OK	17.9294	23.3912	0.383637	-0.661538	0.508267	0.818163	no
Glyma01g37490	Glyma01g37490	Glyma01g37490	Gm01:49841544-49848877	14-13-0	14-13-7	OK	7.77891	4.71457	-0.722441	1.16068	0.245772	0.603891	no
Glyma01g37500	Glyma01g37500	Glyma01g37500	Gm01:49850120-49854265	14-13-0	14-13-7	OK	20.0396	7.6041	-1.39801	2.26517	0.0235023	0.172362	no
Glyma01g37510	Glyma01g37510	Glyma01g37510	Gm01:49858452-49865847	14-13-0	14-13-7	OK	0.469947	1.46686	1.64216	-2.13413	0.0328322	0.208596	no
Glyma01g37520	Glyma01g37520	Glyma01g37520	Gm01:49869523-49871376	14-13-0	14-13-7	OK	1.78792	1.24494	-0.522206	0.752131	0.451972	0.785149	no
Glyma01g37530	Glyma01g37530	Glyma01g37530	Gm01:49872196-49872388	14-13-0	14-13-7	NOTEST	0	0	0	0	1	1	no
Glyma01g37541	Glyma01g37541	Glyma01g37541	Gm01:49879281-49885195	14-13-0	14-13-7	OK	32.3668	25.2921	-0.355831	0.506653	0.612398	0.875036	no
Glyma01g37550	Glyma01g37550	Glyma01g37550	Gm01:49885628-49888995	14-13-0	14-13-7	OK	153.576	106.283	-0.531046	0.779219	0.435851	0.773923	no
Glyma01g37560	Glyma01g37560	Glyma01g37560	Gm01:49891280-49893312	14-13-0	14-13-7	OK	7.43705	7.49451	0.011104	-0.0162023	0.987073	0.997378	no
Glyma01g37571	Glyma01g37571	Glyma01g37571	Gm01:49893933-49905366	14-13-0	14-13-7	NOTEST	0	0	0	0	1	1	no
Glyma01g37580	Glyma01g37580	Glyma01g37580	Gm01:49893933-49905366	14-13-0	14-13-7	OK	16.5957	14.2069	-0.22422	0.325386	0.744889	0.926667	no
Glyma01g37590	Glyma01g37590	Glyma01g37590	Gm01:49909450-49916251	14-13-0	14-13-7	OK	0.616629	0.18127	-1.76626	1.92954	0.0536642	0.273316	no
Glyma01g37600	Glyma01g37600	Glyma01g37600	Gm01:49942124-49946080	14-13-0	14-13-7	NOTEST	0	0.0207368	1.79769e+308	1.79769e+308	0.113214	1	no
Glyma01g37610	Glyma01g37610	Glyma01g37610	Gm01:49946274-49947782	14-13-0	14-13-7	OK	7.08624	4.77444	-0.569689	0.893053	0.371829	0.723647	no
Glyma01g37620	Glyma01g37620	Glyma01g37620	Gm01:49949013-49952809	14-13-0	14-13-7	OK	1.50679	1.25084	-0.268586	0.418464	0.675608	0.901827	no
Glyma01g37630	Glyma01g37630	Glyma01g37630	Gm01:49953469-49956749	14-13-0	14-13-7	NOTEST	0.0383919	0.0815344	1.08661	-0.710044	0.477677	1	no
Glyma01g37640	Glyma01g37640	Glyma01g37640	Gm01:49963812-49969112	14-13-0	14-13-7	NOTEST	0.102153	0.0407443	-1.32607	1.06056	0.28889	1	no
Glyma01g37650	Glyma01g37650	Glyma01g37650	Gm01:49975720-49977560	14-13-0	14-13-7	NOTEST	0.135261	0.287579	1.08822	-1.05283	0.29242	1	no
Glyma01g37670	Glyma01g37670	Glyma01g37670	Gm01:49982520-49986256	14-13-0	14-13-7	OK	3.44583	4.12715	0.260293	-0.448277	0.653953	0.892095	no
Glyma01g37675	Glyma01g37675	Glyma01g37675	Gm01:49992409-49993063	14-13-0	14-13-7	NOTEST	0	0	0	0	1	1	no
Glyma01g37680	Glyma01g37680	Glyma01g37680	Gm01:49999698-50001148	14-13-0	14-13-7	NOTEST	0	0	0	0	1	1	no
Glyma01g37690	Glyma01g37690	Glyma01g37690	Gm01:50011031-50012116	14-13-0	14-13-7	NOTEST	0.125578	0	-1.79769e+308	-1.79769e+308	0.0555427	1	no
Glyma01g37710	Glyma01g37710	Glyma01g37710	Gm01:50023553-50027805	14-13-0	14-13-7	OK	16.5571	12.1231	-0.449693	0.774465	0.438656	0.776164	no
Glyma01g37720	Glyma01g37720	Glyma01g37720	Gm01:50028224-50031144	14-13-0	14-13-7	OK	8.15583	15.2772	0.905481	-1.48872	0.136561	0.451206	no
Glyma01g37730	Glyma01g37730	Glyma01g37730	Gm01:50039747-50044012	14-13-0	14-13-7	OK	5.54647	5.95858	0.1034	-0.180665	0.85663	0.967367	no
Glyma01g37750	Glyma01g37750	Glyma01g37750	Gm01:50051364-50051706	14-13-0	14-13-7	NOTEST	0	0	0	0	1	1	no
Glyma01g37760	Glyma01g37760	Glyma01g37760	Gm01:50053788-50061598	14-13-0	14-13-7	OK	0.870536	1.21677	0.483076	-0.764974	0.444287	0.779065	no
Glyma01g37780	Glyma01g37780	Glyma01g37780	Gm01:50066372-50070574	14-13-0	14-13-7	OK	20.26	12.3334	-0.716062	1.22843	0.219286	0.570519	no
Glyma01g37790	Glyma01g37790	Glyma01g37790	Gm01:50071761-50075271	14-13-0	14-13-7	OK	15.1049	15.9505	0.0785869	-0.133674	0.89366	0.977299	no
Glyma01g37801	Glyma01g37801	Glyma01g37801	Gm01:50076638-50080885	14-13-0	14-13-7	NOTEST	0	0.0133008	1.79769e+308	1.79769e+308	0.196186	1	no
Glyma01g37810	Glyma01g37810	Glyma01g37810	Gm01:50095935-50098278	14-13-0	14-13-7	OK	1.18294	1.69205	0.516398	-0.703669	0.481639	0.8046	no
Glyma01g37820	Glyma01g37820	Glyma01g37820	Gm01:50121728-50127532	14-13-0	14-13-7	NOTEST	0.115987	0.0607716	-0.932493	0.728037	0.466591	1	no
Glyma01g37840	Glyma01g37840	Glyma01g37840	Gm01:50130998-50133253	14-13-0	14-13-7	NOTEST	0	0	0	0	1	1	no
Glyma01g37850	Glyma01g37850	Glyma01g37850	Gm01:50135076-50137305	14-13-0	14-13-7	OK	0.46884	0.445904	-0.0723644	0.077814	0.937976	0.987654	no
Glyma01g37860	Glyma01g37860	Glyma01g37860	Gm01:50141791-50144442	14-13-0	14-13-7	OK	1.79902	1.2562	-0.51814	0.738618	0.460139	0.7908	no
Glyma01g37870	Glyma01g37870	Glyma01g37870	Gm01:50146983-50150059	14-13-0	14-13-7	OK	44.1651	11.7852	-1.90593	2.97476	0.00293217	0.0504974	no
Glyma01g37880	Glyma01g37880	Glyma01g37880	Gm01:50151986-50153270	14-13-0	14-13-7	NOTEST	0	0	0	0	1	1	no
Glyma01g37890	Glyma01g37890	Glyma01g37890	Gm01:50153494-50155300	14-13-0	14-13-7	OK	2.81331	4.11052	0.547056	-0.891029	0.372914	0.724328	no
Glyma01g37900	Glyma01g37900	Glyma01g37900	Gm01:50155332-50163097	14-13-0	14-13-7	OK	253.464	71.86	-1.81852	2.26261	0.0236598	0.17295	no
Glyma01g37910	Glyma01g37910	Glyma01g37910	Gm01:50155332-50163097	14-13-0	14-13-7	OK	6.73729	4.20296	-0.680763	0.227106	0.820341	0.956633	no
Glyma01g37920	Glyma01g37920	Glyma01g37920	Gm01:50155332-50163097	14-13-0	14-13-7	NOTEST	0.0646282	0.071196	0.139633	-0.00408488	0.996741	1	no
Glyma01g37930	Glyma01g37930	Glyma01g37930	Gm01:50166501-50169549	14-13-0	14-13-7	OK	0.835265	1.39722	0.742252	-1.02536	0.305192	0.664701	no
Glyma01g37940	Glyma01g37940	Glyma01g37940	Gm01:50177417-50180805	14-13-0	14-13-7	OK	7.14861	7.74026	0.114719	-0.199521	0.841855	0.962596	no
Glyma01g37950	Glyma01g37950	Glyma01g37950	Gm01:50182416-50188946	14-13-0	14-13-7	OK	2.0062	0.825962	-1.28032	1.86145	0.0626804	0.297961	no
Glyma01g37961	Glyma01g37961	Glyma01g37961	Gm01:50206805-50209153	14-13-0	14-13-7	NOTEST	0	0	0	0	1	1	no
Glyma01g37970	Glyma01g37970	Glyma01g37970	Gm01:50210431-50216350	14-13-0	14-13-7	OK	2.13528	0.526591	-2.01967	2.83964	0.00451647	0.0654661	no
Glyma01g37980	Glyma01g37980	Glyma01g37980	Gm01:50217118-50219743	14-13-0	14-13-7	NOTEST	0	0.108046	1.79769e+308	1.79769e+308	0.113214	1	no
Glyma01g37993	Glyma01g37993	Glyma01g37993	Gm01:50222810-50223758	14-13-0	14-13-7	NOTEST	0.308719	0.363334	0.235003	-0.225591	0.821519	1	no
Glyma01g38006	Glyma01g38006	Glyma01g38006	Gm01:50230283-50235022	14-13-0	14-13-7	NOTEST	0	0	0	0	1	1	no
Glyma01g38020	Glyma01g38020	Glyma01g38020	Gm01:50230283-50235022	14-13-0	14-13-7	LOWDATA	0	0	0	0	1	1	no
Glyma01g38040	Glyma01g38040	Glyma01g38040	Gm01:50244376-50247091	14-13-0	14-13-7	NOTEST	0	0	0	0	1	1	no
Glyma01g38050	Glyma01g38050	Glyma01g38050	Gm01:50251094-50252088	14-13-0	14-13-7	NOTEST	0	0	0	0	1	1	no
Glyma01g38060	Glyma01g38060	Glyma01g38060	Gm01:50253664-50255929	14-13-0	14-13-7	NOTEST	0	0	0	0	1	1	no
Glyma01g38070	Glyma01g38070	Glyma01g38070	Gm01:50257294-50261107	14-13-0	14-13-7	OK	7.89284	4.35061	-0.859329	1.37159	0.170192	0.506982	no
Glyma01g38080	Glyma01g38080	Glyma01g38080	Gm01:50257294-50261107	14-13-0	14-13-7	OK	0.883561	0.954586	0.111546	-0.0254128	0.979726	0.996783	no
Glyma01g38090	Glyma01g38090	Glyma01g38090	Gm01:50261440-50263777	14-13-0	14-13-7	OK	3.09379	5.51384	0.83368	-1.40617	0.159674	0.490686	no
Glyma01g38105	Glyma01g38105	Glyma01g38105	Gm01:50271874-50276395	14-13-0	14-13-7	NOTEST	0.160559	0.0986102	-0.703293	0.647715	0.51717	1	no
Glyma01g38120	Glyma01g38120	Glyma01g38120	Gm01:50277040-50282069	14-13-0	14-13-7	OK	22.5558	18.3922	-0.294408	0.4599	0.645588	0.888925	no
Glyma01g38130	Glyma01g38130	Glyma01g38130	Gm01:50286808-50291347	14-13-0	14-13-7	OK	0.927878	3.89942	2.07125	-3.00824	0.00262762	0.0469095	yes
Glyma01g38150	Glyma01g38150	Glyma01g38150	Gm01:50297901-50304459	14-13-0	14-13-7	OK	0.84673	0.342744	-1.30477	1.68482	0.0920229	0.368511	no
Glyma01g38165	Glyma01g38165	Glyma01g38165	Gm01:50306261-50309677	14-13-0	14-13-7	OK	3.03019	2.44506	-0.309536	0.417389	0.676394	0.902185	no
Glyma01g38180	Glyma01g38180	Glyma01g38180	Gm01:50334433-50339882	14-13-0	14-13-7	OK	2.66758	5.9597	1.15971	-1.85929	0.0629865	0.298848	no
Glyma01g38190	Glyma01g38190	Glyma01g38190	Gm01:50334433-50339882	14-13-0	14-13-7	OK	0.788028	1.46344	0.893044	-0.359814	0.718987	0.917822	no
Glyma01g38200	Glyma01g38200	Glyma01g38200	Gm01:50344732-50351525	14-13-0	14-13-7	OK	22.9792	18.193	-0.336946	0.523233	0.600812	0.870022	no
Glyma01g38211	Glyma01g38211	Glyma01g38211	Gm01:50359266-50363158	14-13-0	14-13-7	OK	245.656	257.202	0.0662602	-0.0508375	0.959455	0.991996	no
Glyma01g38220	Glyma01g38220	Glyma01g38220	Gm01:50366968-50368330	14-13-0	14-13-7	OK	0.773122	0.44197	-0.806748	0.87773	0.38009	0.729516	no
Glyma01g38230	Glyma01g38230	Glyma01g38230	Gm01:50369093-50373219	14-13-0	14-13-7	OK	4.65218	12.3842	1.41252	-2.34728	0.0189109	0.151654	no
Glyma01g38240	Glyma01g38240	Glyma01g38240	Gm01:50382617-50389821	14-13-0	14-13-7	OK	3.37038	2.94507	-0.194611	0.338954	0.734644	0.923305	no
Glyma01g38250	Glyma01g38250	Glyma01g38250	Gm01:50392826-50393355	14-13-0	14-13-7	NOTEST	0	0	0	0	1	1	no
Glyma01g38260	Glyma01g38260	Glyma01g38260	Gm01:50394489-50396439	14-13-0	14-13-7	OK	1.81599	0.535522	-1.76174	1.93617	0.0528466	0.271331	no
Glyma01g38270	Glyma01g38270	Glyma01g38270	Gm01:50396914-50399570	14-13-0	14-13-7	OK	1.59901	2.21554	0.470482	-0.627722	0.530186	0.831759	no
Glyma01g38280	Glyma01g38280	Glyma01g38280	Gm01:50400416-50410022	14-13-0	14-13-7	OK	1.3793	0.846043	-0.705133	1.09808	0.27217	0.632231	no
Glyma01g38285	Glyma01g38285	Glyma01g38285	Gm01:50429282-50431539	14-13-0	14-13-7	NOTEST	0	0	0	0	1	1	no
Glyma01g38290	Glyma01g38290	Glyma01g38290	Gm01:50444755-50448681	14-13-0	14-13-7	OK	10.6994	9.59243	-0.157563	0.255655	0.798217	0.948477	no
Glyma01g38305	Glyma01g38305	Glyma01g38305	Gm01:50449917-50454973	14-13-0	14-13-7	OK	2.33576	1.91374	-0.287498	0.472714	0.636417	0.886177	no
Glyma01g38320	Glyma01g38320	Glyma01g38320	Gm01:50456603-50460237	14-13-0	14-13-7	OK	17.9045	11.3208	-0.661351	1.00461	0.315083	0.674042	no
Glyma01g38330	Glyma01g38330	Glyma01g38330	Gm01:50462526-50464658	14-13-0	14-13-7	OK	3.84511	2.59218	-0.568855	0.730686	0.464971	0.793346	no
Glyma01g38340	Glyma01g38340	Glyma01g38340	Gm01:50465731-50468463	14-13-0	14-13-7	NOTEST	0.0188912	0.0206851	0.130878	-0.0758939	0.939504	1	no
Glyma01g38350	Glyma01g38350	Glyma01g38350	Gm01:50468718-50471279	14-13-0	14-13-7	NOTEST	0.148841	0.18513	0.314769	-0.274069	0.784032	1	no
Glyma01g38360	Glyma01g38360	Glyma01g38360	Gm01:50481849-50484062	14-13-0	14-13-7	OK	7.43667	7.76808	0.0629012	-0.108414	0.913667	0.981754	no
Glyma01g38370	Glyma01g38370	Glyma01g38370	Gm01:50487836-50491942	14-13-0	14-13-7	OK	10.5513	6.89563	-0.613671	1.02504	0.305344	0.664862	no
Glyma01g38381	Glyma01g38381	Glyma01g38381	Gm01:50492109-50499655	14-13-0	14-13-7	OK	0.183183	0.40185	1.13337	-1.04392	0.29652	0.656137	no
Glyma01g38390	Glyma01g38390	Glyma01g38390	Gm01:50502781-50505172	14-13-0	14-13-7	OK	0	0.404826	1.79769e+308	1.79769e+308	0.019682	0.155265	no
Glyma01g38400	Glyma01g38400	Glyma01g38400	Gm01:50522426-50525037	14-13-0	14-13-7	OK	2.96545	2.65182	-0.161263	0.260753	0.794283	0.946637	no
Glyma01g38410	Glyma01g38410	Glyma01g38410	Gm01:50528621-50536566	14-13-0	14-13-7	OK	15.8118	15.383	-0.0396637	0.0585967	0.953273	0.990322	no
Glyma01g38430	Glyma01g38430	Glyma01g38430	Gm01:50543383-50544862	14-13-0	14-13-7	NOTEST	0	0.0196573	1.79769e+308	1.79769e+308	0.196186	1	no
Glyma01g38450	Glyma01g38450	Glyma01g38450	Gm01:50549840-50551564	14-13-0	14-13-7	OK	20.0129	30.2921	0.59801	-0.930457	0.352134	0.706662	no
Glyma01g38460	Glyma01g38460	Glyma01g38460	Gm01:50559469-50563981	14-13-0	14-13-7	OK	2.1519	2.04627	-0.0726149	0.112373	0.910528	0.981078	no
Glyma01g38470	Glyma01g38470	Glyma01g38470	Gm01:50564247-50567428	14-13-0	14-13-7	OK	53.8171	46.0187	-0.225844	0.338581	0.734925	0.923482	no
Glyma01g38481	Glyma01g38481	Glyma01g38481	Gm01:50571005-50572016	14-13-0	14-13-7	NOTEST	0.183939	0.135013	-0.446128	0.366372	0.714087	1	no
Glyma01g38490	Glyma01g38490	Glyma01g38490	Gm01:50575585-50578085	14-13-0	14-13-7	OK	0.792131	0.863122	0.123825	-0.150066	0.880713	0.973506	no
Glyma01g38500	Glyma01g38500	Glyma01g38500	Gm01:50580026-50582631	14-13-0	14-13-7	OK	3.18643	0.567433	-2.48942	3.36108	0.000776391	0.0206572	yes
Glyma01g38510	Glyma01g38510	Glyma01g38510	Gm01:50585499-50587165	14-13-0	14-13-7	OK	7.0027	8.699	0.312939	-0.53968	0.589418	0.865277	no
Glyma01g38520	Glyma01g38520	Glyma01g38520	Gm01:50595299-50597560	14-13-0	14-13-7	OK	1.02598	1.96194	0.935285	-1.36291	0.172911	0.510995	no
Glyma01g38530	Glyma01g38530	Glyma01g38530	Gm01:50601604-50607434	14-13-0	14-13-7	NOTEST	0	0.0203583	1.79769e+308	1.79769e+308	0.232212	1	no
Glyma01g38540	Glyma01g38540	Glyma01g38540	Gm01:50612385-50613848	14-13-0	14-13-7	NOTEST	0	0	0	0	1	1	no
Glyma01g38550	Glyma01g38550	Glyma01g38550	Gm01:50621610-50624263	14-13-0	14-13-7	NOTEST	0	0.0498152	1.79769e+308	1.79769e+308	0.0692411	1	no
Glyma01g38560	Glyma01g38560	Glyma01g38560	Gm01:50625695-50629374	14-13-0	14-13-7	OK	0.26112	0.377987	0.533627	-0.652824	0.51387	0.822007	no
Glyma01g38570	Glyma01g38570	Glyma01g38570	Gm01:50630573-50632809	14-13-0	14-13-7	OK	0.427446	0.226012	-0.91934	0.964584	0.334753	0.691432	no
Glyma01g38580	Glyma01g38580	Glyma01g38580	Gm01:50633743-50644902	14-13-0	14-13-7	OK	0.567088	0.966928	0.769835	-1.20806	0.227024	0.580021	no
Glyma01g38590	Glyma01g38590	Glyma01g38590	Gm01:50645459-50648060	14-13-0	14-13-7	OK	14.1269	5.99681	-1.23617	2.11624	0.0343247	0.213096	no
Glyma01g38600	Glyma01g38600	Glyma01g38600	Gm01:50652785-50654854	14-13-0	14-13-7	OK	1.74775	0.238557	-2.87309	3.3866	0.000707635	0.0194032	yes
Glyma01g38610	Glyma01g38610	Glyma01g38610	Gm01:50657110-50660265	14-13-0	14-13-7	NOTEST	0.0336617	0.105956	1.65428	-1.11049	0.26679	1	no
Glyma01g38630	Glyma01g38630	Glyma01g38630	Gm01:50667181-50669294	14-13-0	14-13-7	NOTEST	0	0.0756474	1.79769e+308	1.79769e+308	0.0523416	1	no
Glyma01g38640	Glyma01g38640	Glyma01g38640	Gm01:50682059-50689940	14-13-0	14-13-7	OK	8.28352	5.47622	-0.597064	1.03917	0.298727	0.65849	no
Glyma01g38650	Glyma01g38650	Glyma01g38650	Gm01:50714207-50721679	14-13-0	14-13-7	OK	28.161	22.488	-0.324541	0.465217	0.641776	0.887203	no
Glyma01g38660	Glyma01g38660	Glyma01g38660	Gm01:50733266-50737661	14-13-0	14-13-7	OK	0.754392	0.516931	-0.545342	0.706772	0.479708	0.803521	no
Glyma01g38671	Glyma01g38671	Glyma01g38671	Gm01:50746604-50760836	14-13-0	14-13-7	OK	0.715823	1.52083	1.08719	-1.55883	0.119036	0.422543	no
Glyma01g38680	Glyma01g38680	Glyma01g38680	Gm01:50767560-50772744	14-13-0	14-13-7	OK	1.18915	1.39099	0.226182	-0.345063	0.730047	0.921374	no
Glyma01g38683	Glyma01g38683	Glyma01g38683	Gm01:50776465-50776986	14-13-0	14-13-7	NOTEST	0	0	0	0	1	1	no
Glyma01g38686	Glyma01g38686	Glyma01g38686	Gm01:50778421-50779180	14-13-0	14-13-7	NOTEST	0	0	0	0	1	1	no
Glyma01g38690	Glyma01g38690	Glyma01g38690	Gm01:50779484-50780771	14-13-0	14-13-7	OK	0	0.424893	1.79769e+308	1.79769e+308	0.0151173	0.133674	no
Glyma01g38710	Glyma01g38710	Glyma01g38710	Gm01:50784350-50784782	14-13-0	14-13-7	OK	0.82953	0.589877	-0.491882	0.425676	0.670344	0.899835	no
Glyma01g38720	Glyma01g38720	Glyma01g38720	Gm01:50799865-50800659	14-13-0	14-13-7	NOTEST	0	0.131436	1.79769e+308	1.79769e+308	0.0692411	1	no
Glyma01g38730	Glyma01g38730	Glyma01g38730	Gm01:50805196-50807200	14-13-0	14-13-7	NOTEST	0.134626	0.200633	0.575607	-0.539555	0.589504	1	no
Glyma01g38740	Glyma01g38740	Glyma01g38740	Gm01:50808925-50811172	14-13-0	14-13-7	OK	1.56802	2.07142	0.401678	-0.460034	0.645491	0.888861	no
Glyma01g38750	Glyma01g38750	Glyma01g38750	Gm01:50813274-50815197	14-13-0	14-13-7	OK	1447.17	1080.67	-0.4213	0.383495	0.701353	0.911807	no
Glyma01g38760	Glyma01g38760	Glyma01g38760	Gm01:50816662-50817396	14-13-0	14-13-7	OK	6.97452	0.189447	-5.20223	2.92057	0.00349396	0.0560362	no
Glyma01g38770	Glyma01g38770	Glyma01g38770	Gm01:50817872-50819939	14-13-0	14-13-7	OK	4.65394	1.16005	-2.00426	2.66578	0.00768095	0.0902975	no
Glyma01g38780	Glyma01g38780	Glyma01g38780	Gm01:50823650-50825788	14-13-0	14-13-7	OK	0.698765	0.0561236	-3.63813	3.21315	0.00131287	0.0296285	yes
Glyma01g38800	Glyma01g38800	Glyma01g38800	Gm01:50835383-50838753	14-13-0	14-13-7	OK	12.7198	7.16363	-0.828311	1.41042	0.158415	0.48831	no
Glyma01g38830	Glyma01g38830	Glyma01g38830	Gm01:50842944-50844670	14-13-0	14-13-7	NOTEST	0	0	0	0	1	1	no
Glyma01g38840	Glyma01g38840	Glyma01g38840	Gm01:50846296-50851361	14-13-0	14-13-7	OK	3.66954	4.08486	0.154688	-0.264519	0.79138	0.945118	no
Glyma01g38850	Glyma01g38850	Glyma01g38850	Gm01:50852873-50855077	14-13-0	14-13-7	NOTEST	0	0.121288	1.79769e+308	1.79769e+308	0.0445687	1	no
Glyma01g38860	Glyma01g38860	Glyma01g38860	Gm01:50858802-50861902	14-13-0	14-13-7	NOTEST	0.0353113	0	-1.79769e+308	-1.79769e+308	0.123372	1	no
Glyma01g38870	Glyma01g38870	Glyma01g38870	Gm01:50865163-50867505	14-13-0	14-13-7	OK	0	0.437767	1.79769e+308	1.79769e+308	0.00803752	0.0929727	no
Glyma01g38880	Glyma01g38880	Glyma01g38880	Gm01:50879358-50885115	14-13-0	14-13-7	OK	3.19466	2.55711	-0.321152	0.522873	0.601063	0.870022	no
Glyma01g38890	Glyma01g38890	Glyma01g38890	Gm01:50885116-50891376	14-13-0	14-13-7	OK	2.67387	3.95966	0.566445	-0.985638	0.324311	0.68225	no
Glyma01g38900	Glyma01g38900	Glyma01g38900	Gm01:50896720-50898557	14-13-0	14-13-7	NOTEST	0	0.0500439	1.79769e+308	1.79769e+308	0.0692411	1	no
Glyma01g38905	Glyma01g38905	Glyma01g38905	Gm01:50904042-50904806	14-13-0	14-13-7	NOTEST	0	0	0	0	1	1	no
Glyma01g38910	Glyma01g38910	Glyma01g38910	Gm01:50905481-50907657	14-13-0	14-13-7	OK	2.30338	1.70338	-0.43535	0.595307	0.551638	0.843461	no
Glyma01g38920	Glyma01g38920	Glyma01g38920	Gm01:50914354-50920765	14-13-0	14-13-7	OK	0.599939	1.62312	1.43588	-2.0259	0.0427745	0.241537	no
Glyma01g38930	Glyma01g38930	Glyma01g38930	Gm01:50921917-50923972	14-13-0	14-13-7	OK	85.0162	90.11	0.08395	-0.119468	0.904905	0.979879	no
Glyma01g38940	Glyma01g38940	Glyma01g38940	Gm01:50926261-50927303	14-13-0	14-13-7	OK	299.206	161.126	-0.892947	1.14907	0.250528	0.609221	no
Glyma01g38950	Glyma01g38950	Glyma01g38950	Gm01:50927363-50936118	14-13-0	14-13-7	OK	11.9916	5.72279	-1.06723	1.76611	0.0773779	0.334887	no
Glyma01g38970	Glyma01g38970	Glyma01g38970	Gm01:50951026-50952807	14-13-0	14-13-7	OK	0.909267	1.43542	0.658697	-0.880615	0.378526	0.728529	no
Glyma01g38980	Glyma01g38980	Glyma01g38980	Gm01:50956636-50960580	14-13-0	14-13-7	OK	1.54208	4.26026	1.46607	-2.36376	0.0180903	0.147413	no
Glyma01g38990	Glyma01g38990	Glyma01g38990	Gm01:50965004-50966084	14-13-0	14-13-7	OK	0	0.451867	1.79769e+308	1.79769e+308	0.0342161	0.21278	no
Glyma01g39000	Glyma01g39000	Glyma01g39000	Gm01:50968054-50971842	14-13-0	14-13-7	OK	0.494181	2.15254	2.12293	-3.02126	0.00251723	0.0457769	yes
Glyma01g39010	Glyma01g39010	Glyma01g39010	Gm01:50973225-50978011	14-13-0	14-13-7	OK	0.965121	1.76423	0.870256	-1.35764	0.174578	0.513716	no
Glyma01g39020	Glyma01g39020	Glyma01g39020	Gm01:50978689-50990291	14-13-0	14-13-7	OK	4.07168	5.77135	0.503284	-0.832081	0.405363	0.750466	no
Glyma01g39030	Glyma01g39030	Glyma01g39030	Gm01:50993362-50998484	14-13-0	14-13-7	OK	10.2579	6.37797	-0.685573	1.07111	0.284119	0.64391	no
Glyma01g39040	Glyma01g39040	Glyma01g39040	Gm01:51015839-51018131	14-13-0	14-13-7	OK	2.18272	0.121923	-4.16209	4.56026	5.10903e-06	0.000443389	yes
Glyma01g39050	Glyma01g39050	Glyma01g39050	Gm01:51020378-51026936	14-13-0	14-13-7	OK	2.83531	1.4446	-0.972833	1.52492	0.12728	0.435707	no
Glyma01g39060	Glyma01g39060	Glyma01g39060	Gm01:51032159-51036122	14-13-0	14-13-7	NOTEST	0	0.0330964	1.79769e+308	1.79769e+308	0.193499	1	no
Glyma01g39071	Glyma01g39071	Glyma01g39071	Gm01:51054324-51059649	14-13-0	14-13-7	NOTEST	0	0	0	0	1	1	no
Glyma01g39080	Glyma01g39080	Glyma01g39080	Gm01:51065275-51067178	14-13-0	14-13-7	NOTEST	0	0.0325542	1.79769e+308	1.79769e+308	0.196186	1	no
Glyma01g39090	Glyma01g39090	Glyma01g39090	Gm01:51073678-51079219	14-13-0	14-13-7	OK	1.32584	1.59099	0.263015	-0.411478	0.680722	0.903712	no
Glyma01g39100	Glyma01g39100	Glyma01g39100	Gm01:51080529-51083731	14-13-0	14-13-7	OK	0.920846	1.70482	0.888588	-1.24797	0.212043	0.560412	no
Glyma01g39110	Glyma01g39110	Glyma01g39110	Gm01:51090471-51105666	14-13-0	14-13-7	OK	0.331703	0.54606	0.719168	-0.769444	0.44163	0.777945	no
Glyma01g39120	Glyma01g39120	Glyma01g39120	Gm01:51105888-51110702	14-13-0	14-13-7	OK	18.6032	35.5613	0.934762	-0.953691	0.34024	0.696813	no
Glyma01g39141	Glyma01g39141	Glyma01g39141	Gm01:51125197-51131131	14-13-0	14-13-7	OK	3.35086	2.64012	-0.343929	0.600452	0.548205	0.841544	no
Glyma01g39160	Glyma01g39160	Glyma01g39160	Gm01:51146769-51147427	14-13-0	14-13-7	NOTEST	0	0	0	0	1	1	no
Glyma01g39170	Glyma01g39170	Glyma01g39170	Gm01:51153265-51154075	14-13-0	14-13-7	NOTEST	0	0	0	0	1	1	no
Glyma01g39180	Glyma01g39180	Glyma01g39180	Gm01:51160065-51160350	14-13-0	14-13-7	NOTEST	0	0	0	0	1	1	no
Glyma01g39190	Glyma01g39190	Glyma01g39190	Gm01:51164315-51168296	14-13-0	14-13-7	OK	0.51843	0.754882	0.542101	-0.482883	0.629179	0.882565	no
Glyma01g39200	Glyma01g39200	Glyma01g39200	Gm01:51176939-51182827	14-13-0	14-13-7	OK	97.3325	33.1294	-1.55481	2.245	0.0247678	0.177848	no
Glyma01g39220	Glyma01g39220	Glyma01g39220	Gm01:51195447-51198098	14-13-0	14-13-7	OK	1.6353	7.91971	2.27589	-3.65589	0.000256289	0.00951755	yes
Glyma01g39230	Glyma01g39230	Glyma01g39230	Gm01:51207026-51208664	14-13-0	14-13-7	NOTEST	0	0	0	0	1	1	no
Glyma01g39240	Glyma01g39240	Glyma01g39240	Gm01:51218796-51220209	14-13-0	14-13-7	OK	5.01597	4.06859	-0.301998	0.490906	0.623493	0.879167	no
Glyma01g39250	Glyma01g39250	Glyma01g39250	Gm01:51223239-51226456	14-13-0	14-13-7	OK	11.5109	6.40641	-0.845407	1.1197	0.26284	0.622449	no
Glyma01g39260	Glyma01g39260	Glyma01g39260	Gm01:51227462-51229777	14-13-0	14-13-7	OK	1.34961	2.42175	0.843504	-1.25432	0.209725	0.557294	no
Glyma01g39270	Glyma01g39270	Glyma01g39270	Gm01:51234092-51236207	14-13-0	14-13-7	OK	64.683	61.7618	-0.0666735	0.0936827	0.925361	0.984857	no
Glyma01g39280	Glyma01g39280	Glyma01g39280	Gm01:51241780-51246700	14-13-0	14-13-7	OK	15.2674	16.1538	0.0814257	-0.13158	0.895316	0.977525	no
Glyma01g39290	Glyma01g39290	Glyma01g39290	Gm01:51259529-51261619	14-13-0	14-13-7	OK	3.93474	2.42204	-0.700043	1.16817	0.242736	0.600089	no
Glyma01g39300	Glyma01g39300	Glyma01g39300	Gm01:51273336-51279506	14-13-0	14-13-7	NOTEST	0	0	0	0	1	1	no
Glyma01g39306	Glyma01g39306	Glyma01g39306	Gm01:51273336-51279506	14-13-0	14-13-7	NOTEST	0	0	0	0	1	1	no
Glyma01g39313	Glyma01g39313	Glyma01g39313	Gm01:51280851-51284021	14-13-0	14-13-7	NOTEST	0	0.0812601	1.79769e+308	1.79769e+308	0.113214	1	no
Glyma01g39320	Glyma01g39320	Glyma01g39320	Gm01:51287475-51290552	14-13-0	14-13-7	OK	4.25493	2.52246	-0.754305	1.24022	0.214895	0.563712	no
Glyma01g39330	Glyma01g39330	Glyma01g39330	Gm01:51290922-51295650	14-13-0	14-13-7	OK	12.7293	13.2143	0.0539476	-0.0921508	0.926578	0.985056	no
Glyma01g39340	Glyma01g39340	Glyma01g39340	Gm01:51296877-51297857	14-13-0	14-13-7	OK	0.747449	0.676569	-0.143739	0.143859	0.885612	0.975347	no
Glyma01g39350	Glyma01g39350	Glyma01g39350	Gm01:51298441-51305321	14-13-0	14-13-7	OK	26.5583	24.0315	-0.144236	0.228985	0.81888	0.955984	no
Glyma01g39360	Glyma01g39360	Glyma01g39360	Gm01:51314677-51315832	14-13-0	14-13-7	NOTEST	0	0	0	0	1	1	no
Glyma01g39370	Glyma01g39370	Glyma01g39370	Gm01:51321188-51322374	14-13-0	14-13-7	OK	4.81828	13.8422	1.52249	-2.56425	0.01034	0.10729	no
Glyma01g39380	Glyma01g39380	Glyma01g39380	Gm01:51332253-51333769	14-13-0	14-13-7	NOTEST	0	0.0516596	1.79769e+308	1.79769e+308	0.0881256	1	no
Glyma01g39391	Glyma01g39391	Glyma01g39391	Gm01:51334950-51335823	14-13-0	14-13-7	NOTEST	0	0	0	0	1	1	no
Glyma01g39401	Glyma01g39401	Glyma01g39401	Gm01:51345282-51346122	14-13-0	14-13-7	NOTEST	0	0	0	0	1	1	no
Glyma01g39410	Glyma01g39410	Glyma01g39410	Gm01:51349990-51355206	14-13-0	14-13-7	OK	5.58728	6.43532	0.203866	-0.316349	0.751738	0.929288	no
Glyma01g39420	Glyma01g39420	Glyma01g39420	Gm01:51355206-51358366	14-13-0	14-13-7	OK	3.06436	4.77426	0.639695	-1.09709	0.272602	0.632625	no
Glyma01g39430	Glyma01g39430	Glyma01g39430	Gm01:51363128-51376630	14-13-0	14-13-7	OK	1.44828	0.655675	-1.14329	1.85546	0.0635307	0.300366	no
Glyma01g39440	Glyma01g39440	Glyma01g39440	Gm01:51376879-51383234	14-13-0	14-13-7	NOTEST	0	0	0	0	1	1	no
Glyma01g39451	Glyma01g39451	Glyma01g39451	Gm01:51385174-51388582	14-13-0	14-13-7	OK	0.644808	0.125534	-2.3608	2.40091	0.0163545	0.13945	no
Glyma01g39460	Glyma01g39460	Glyma01g39460	Gm01:51397147-51399175	14-13-0	14-13-7	OK	1.23994	4.36543	1.81585	-2.49792	0.0124925	0.118873	no
Glyma01g39470	Glyma01g39470	Glyma01g39470	Gm01:51403228-51406259	14-13-0	14-13-7	OK	3.06815	2.53141	-0.277432	0.391267	0.6956	0.909613	no
Glyma01g39480	Glyma01g39480	Glyma01g39480	Gm01:51407024-51411165	14-13-0	14-13-7	NOTEST	0.145782	0.323389	1.14946	-1.16596	0.243629	1	no
Glyma01g39490	Glyma01g39490	Glyma01g39490	Gm01:51412886-51422885	14-13-0	14-13-7	OK	1.52965	1.55301	0.021868	-0.0354651	0.971709	0.99507	no
Glyma01g39500	Glyma01g39500	Glyma01g39500	Gm01:51428871-51431363	14-13-0	14-13-7	OK	102.507	30.5403	-1.74694	2.54796	0.0108354	0.109918	no
Glyma01g39510	Glyma01g39510	Glyma01g39510	Gm01:51431925-51439061	14-13-0	14-13-7	OK	0.528086	1.17175	1.14982	-1.60627	0.108214	0.401778	no
Glyma01g39520	Glyma01g39520	Glyma01g39520	Gm01:51456457-51460406	14-13-0	14-13-7	OK	6.28009	5.34062	-0.233778	0.34288	0.731689	0.921932	no
Glyma01g39530	Glyma01g39530	Glyma01g39530	Gm01:51483951-51489283	14-13-0	14-13-7	OK	167.212	194.849	0.220681	-0.262147	0.793208	0.946138	no
Glyma01g39540	Glyma01g39540	Glyma01g39540	Gm01:51490230-51491823	14-13-0	14-13-7	OK	20.6443	11.6029	-0.831259	1.39762	0.162227	0.494815	no
Glyma01g39560	Glyma01g39560	Glyma01g39560	Gm01:51508290-51512259	14-13-0	14-13-7	OK	7.50877	6.62304	-0.181083	0.297665	0.765959	0.935353	no
Glyma01g39570	Glyma01g39570	Glyma01g39570	Gm01:51516172-51517312	14-13-0	14-13-7	OK	0.822913	0.197733	-2.05719	2.06859	0.0385844	0.227809	no
Glyma01g39580	Glyma01g39580	Glyma01g39580	Gm01:51518038-51522362	14-13-0	14-13-7	OK	12.0254	14.0325	0.222685	-0.387837	0.698137	0.910971	no
Glyma01g39590	Glyma01g39590	Glyma01g39590	Gm01:51527348-51528891	14-13-0	14-13-7	OK	0.602628	1.06306	0.818882	-1.0013	0.316683	0.67533	no
Glyma01g39600	Glyma01g39600	Glyma01g39600	Gm01:51531989-51534998	14-13-0	14-13-7	OK	5.20955	5.60796	0.106316	-0.168249	0.866387	0.969601	no
Glyma01g39610	Glyma01g39610	Glyma01g39610	Gm01:51545785-51549819	14-13-0	14-13-7	OK	1.37114	2.16473	0.658814	-1.04115	0.297808	0.657598	no
Glyma01g39630	Glyma01g39630	Glyma01g39630	Gm01:51555027-51556605	14-13-0	14-13-7	OK	0.575378	0.582936	0.0188255	-0.0216828	0.982701	0.997056	no
Glyma01g39640	Glyma01g39640	Glyma01g39640	Gm01:51557943-51560354	14-13-0	14-13-7	OK	6.8201	5.75872	-0.244046	0.405573	0.685056	0.905614	no
Glyma01g39650	Glyma01g39650	Glyma01g39650	Gm01:51565663-51573461	14-13-0	14-13-7	OK	2.50533	2.75927	0.139286	-0.231828	0.816671	0.955058	no
Glyma01g39660	Glyma01g39660	Glyma01g39660	Gm01:51574045-51576407	14-13-0	14-13-7	OK	1.31366	1.31081	-0.00312596	0.00468105	0.996265	0.999009	no
Glyma01g39690	Glyma01g39690	Glyma01g39690	Gm01:51579270-51581490	14-13-0	14-13-7	NOTEST	0.0333867	0.279316	3.06455	-2.16443	0.0304315	1	no
Glyma01g39700	Glyma01g39700	Glyma01g39700	Gm01:51584479-51586969	14-13-0	14-13-7	OK	5.75096	5.19312	-0.1472	0.213215	0.83116	0.960463	no
Glyma01g39710	Glyma01g39710	Glyma01g39710	Gm01:51587208-51587971	14-13-0	14-13-7	OK	0.463611	0.640312	0.46586	-0.432897	0.66509	0.897415	no
Glyma01g39720	Glyma01g39720	Glyma01g39720	Gm01:51588563-51590809	14-13-0	14-13-7	NOTEST	0.0710779	0.265142	1.89929	-1.66804	0.0953073	1	no
Glyma01g39740	Glyma01g39740	Glyma01g39740	Gm01:51613142-51614901	14-13-0	14-13-7	OK	14.5326	18.2569	0.329148	-0.542172	0.5877	0.864049	no
Glyma01g39750	Glyma01g39750	Glyma01g39750	Gm01:51624486-51625983	14-13-0	14-13-7	OK	0.440965	0.474474	0.105666	-0.0865733	0.931011	0.986263	no
Glyma01g39760	Glyma01g39760	Glyma01g39760	Gm01:51627630-51629200	14-13-0	14-13-7	NOTEST	0.0459634	0.0247662	-0.892111	0.425472	0.670493	1	no
Glyma01g39770	Glyma01g39770	Glyma01g39770	Gm01:51633199-51634269	14-13-0	14-13-7	OK	14.6874	5.52736	-1.40991	2.30469	0.0211839	0.162227	no
Glyma01g39780	Glyma01g39780	Glyma01g39780	Gm01:51645378-51647678	14-13-0	14-13-7	NOTEST	0	0.0559081	1.79769e+308	1.79769e+308	0.0523416	1	no
Glyma01g39790	Glyma01g39790	Glyma01g39790	Gm01:51653322-51656914	14-13-0	14-13-7	OK	40.3383	11.3519	-1.82922	2.89809	0.00375446	0.0582715	no
Glyma01g39800	Glyma01g39800	Glyma01g39800	Gm01:51659391-51665037	14-13-0	14-13-7	OK	1.50885	2.07803	0.46176	-0.69996	0.483952	0.805543	no
Glyma01g39810	Glyma01g39810	Glyma01g39810	Gm01:51668222-51670161	14-13-0	14-13-7	OK	12.3292	18.3632	0.574736	-0.983317	0.325452	0.683239	no
Glyma01g39820	Glyma01g39820	Glyma01g39820	Gm01:51675929-51677501	14-13-0	14-13-7	NOTEST	0	0	0	0	1	1	no
Glyma01g39830	Glyma01g39830	Glyma01g39830	Gm01:51679882-51690594	14-13-0	14-13-7	OK	2.95496	3.94631	0.417367	-0.708965	0.478346	0.802537	no
Glyma01g39850	Glyma01g39850	Glyma01g39850	Gm01:51698415-51700257	14-13-0	14-13-7	OK	5.9992	71.3323	3.57171	-5.54774	2.89383e-08	6.57097e-06	yes
Glyma01g39860	Glyma01g39860	Glyma01g39860	Gm01:51704330-51708072	14-13-0	14-13-7	OK	0.560918	1.93324	1.78516	-2.28112	0.0225416	0.168843	no
Glyma01g39870	Glyma01g39870	Glyma01g39870	Gm01:51714716-51716494	14-13-0	14-13-7	NOTEST	0.0685975	0.0732856	0.0953739	-0.075155	0.940091	1	no
Glyma01g39880	Glyma01g39880	Glyma01g39880	Gm01:51721226-51730602	14-13-0	14-13-7	OK	0.666687	0.763872	0.196323	-0.0458485	0.963431	0.992902	no
Glyma01g39890	Glyma01g39890	Glyma01g39890	Gm01:51721226-51730602	14-13-0	14-13-7	OK	55.0498	21.0161	-1.38924	2.07376	0.038102	0.225997	no
Glyma01g39900	Glyma01g39900	Glyma01g39900	Gm01:51730921-51747255	14-13-0	14-13-7	NOTEST	0.121637	0.0664936	-0.87129	0.208587	0.834771	1	no
Glyma01g39910	Glyma01g39910	Glyma01g39910	Gm01:51730921-51747255	14-13-0	14-13-7	OK	1.40495	1.55872	0.149843	-0.176491	0.859909	0.968497	no
Glyma01g39920	Glyma01g39920	Glyma01g39920	Gm01:51750715-51754579	14-13-0	14-13-7	OK	1.71758	2.05855	0.261247	-0.348622	0.727373	0.920448	no
Glyma01g39935	Glyma01g39935	Glyma01g39935	Gm01:51755461-51757387	14-13-0	14-13-7	OK	17.7418	18.3483	0.0484897	-0.0844609	0.93269	0.986537	no
Glyma01g39950	Glyma01g39950	Glyma01g39950	Gm01:51758052-51764933	14-13-0	14-13-7	OK	6.73463	17.2718	1.35875	-2.26873	0.0232849	0.17139	no
Glyma01g39960	Glyma01g39960	Glyma01g39960	Gm01:51768697-51773656	14-13-0	14-13-7	OK	21.9244	14.1904	-0.627624	0.982904	0.325655	0.683298	no
Glyma01g39970	Glyma01g39970	Glyma01g39970	Gm01:51778756-51782898	14-13-0	14-13-7	OK	13.7369	8.94128	-0.619499	1.02331	0.306163	0.665509	no
Glyma01g39981	Glyma01g39981	Glyma01g39981	Gm01:51784287-51787179	14-13-0	14-13-7	OK	1.23775	2.24362	0.858109	-1.08218	0.279173	0.639433	no
Glyma01g39990	Glyma01g39990	Glyma01g39990	Gm01:51795376-51797766	14-13-0	14-13-7	OK	0.837753	1.32717	0.663752	-0.846672	0.397178	0.744039	no
Glyma01g40010	Glyma01g40010	Glyma01g40010	Gm01:51813387-51815770	14-13-0	14-13-7	OK	28.0861	2.97529	-3.23875	5.14834	2.62795e-07	3.99641e-05	yes
Glyma01g40030	Glyma01g40030	Glyma01g40030	Gm01:51830579-51838128	14-13-0	14-13-7	OK	1.74158	2.9799	0.774861	-0.310424	0.756238	0.931793	no
Glyma01g40041	Glyma01g40041	Glyma01g40041	Gm01:51830579-51838128	14-13-0	14-13-7	OK	2.96116	2.00176	-0.564896	0.89028	0.373316	0.724574	no
Glyma01g40050	Glyma01g40050	Glyma01g40050	Gm01:51861767-51863943	14-13-0	14-13-7	NOTEST	0.0908863	0.277401	1.60984	-1.51079	0.130842	1	no
Glyma01g40060	Glyma01g40060	Glyma01g40060	Gm01:51873281-51875272	14-13-0	14-13-7	NOTEST	0	0	0	0	1	1	no
Glyma01g40080	Glyma01g40080	Glyma01g40080	Gm01:51889805-51895295	14-13-0	14-13-7	OK	3.93392	1.36494	-1.52713	2.57489	0.0100271	0.105295	no
Glyma01g40090	Glyma01g40090	Glyma01g40090	Gm01:51899586-51905304	14-13-0	14-13-7	OK	2.98354	1.28123	-1.21949	1.40378	0.160386	0.491853	no
Glyma01g40100	Glyma01g40100	Glyma01g40100	Gm01:51910087-51912612	14-13-0	14-13-7	NOTEST	0	0.0680524	1.79769e+308	1.79769e+308	0.0523416	1	no
Glyma01g40110	Glyma01g40110	Glyma01g40110	Gm01:51918737-51926979	14-13-0	14-13-7	NOTEST	0.0573907	0.0758959	0.403205	-0.368136	0.712772	1	no
Glyma01g40130	Glyma01g40130	Glyma01g40130	Gm01:51926992-51932894	14-13-0	14-13-7	OK	5.18933	12.188	1.23184	-1.97128	0.0486919	0.259562	no
Glyma01g40140	Glyma01g40140	Glyma01g40140	Gm01:51939465-51943260	14-13-0	14-13-7	OK	35.1932	12.6982	-1.47067	2.3839	0.0171304	0.14287	no
Glyma01g40150	Glyma01g40150	Glyma01g40150	Gm01:51946620-51947536	14-13-0	14-13-7	OK	61.729	25.5436	-1.27299	2.0593	0.0394653	0.230783	no
Glyma01g40161	Glyma01g40161	Glyma01g40161	Gm01:51948401-51952638	14-13-0	14-13-7	OK	0.699889	0.98927	0.49924	-0.648232	0.516835	0.824144	no
Glyma01g40170	Glyma01g40170	Glyma01g40170	Gm01:51956944-51961922	14-13-0	14-13-7	OK	3.63201	3.17746	-0.192893	0.330412	0.741089	0.925531	no
Glyma01g40180	Glyma01g40180	Glyma01g40180	Gm01:51965657-51969274	14-13-0	14-13-7	OK	2.5238	1.70031	-0.569801	0.907974	0.363892	0.716502	no
Glyma01g40190	Glyma01g40190	Glyma01g40190	Gm01:51969918-51974115	14-13-0	14-13-7	OK	1.38998	2.36287	0.76548	-1.18362	0.236563	0.592784	no
[truncated: 52,176 more rows]
