# Supplementary material for: Overexpression of a Cinnamyl Alcohol Dehydrogenase-Coding Gene, GsCAD1, from Wild Soybean Enhances Resistance to Soybean Mosaic Virus
Source: MDPI journal article supplement (doi:10.3390/ijms232315206), 2022-12-02
Supplement: s1 [file s1 › Table S8 S-1-0D-vs-14D.xlsx]

## Sheet: Sheet1
test_id	gene_id	gene	locus	sample_1	sample_2	status	value_1	value_2	log2(fold_change)	test_stat	p_value	q_value	significant
Glyma0002s50	Glyma0002s50	Glyma0002s50	Gm02:2248-17672	14-13-0	14-13-14	OK	3.80349	2.0565	-0.887134	1.22374	0.221049	0.550278	no
Glyma0003s50	Glyma0003s50	Glyma0003s50	Gm03:8648-28244	14-13-0	14-13-14	OK	16.2612	6.98355	-1.2194	1.66937	0.0950436	0.339544	no
Glyma0005s50	Glyma0005s50	Glyma0005s50	Gm05:16184-21667	14-13-0	14-13-14	OK	0.83468	2.62144	1.65107	-1.57609	0.115005	0.382333	no
Glyma0006s50	Glyma0006s50	Glyma0006s50	Gm06:1757-15096	14-13-0	14-13-14	OK	9.70916	8.70603	-0.157331	0.218395	0.827122	0.959429	no
Glyma0007s50	Glyma0007s50	Glyma0007s50	Gm07:1209-3554	14-13-0	14-13-14	OK	0.692046	0.483283	-0.517998	0.410818	0.681206	0.905385	no
Glyma0010s50	Glyma0010s50	Glyma0010s50	Gm10:10493-13224	14-13-0	14-13-14	NOTEST	0	0	0	0	1	1	no
Glyma0011s50	Glyma0011s50	Glyma0011s50	Gm11:1119-5508	14-13-0	14-13-14	NOTEST	0	0	0	0	1	1	no
Glyma0015s50	Glyma0015s50	Glyma0015s50	Gm15:626-2726	14-13-0	14-13-14	NOTEST	0	0	0	0	1	1	no
Glyma0017s50	Glyma0017s50	Glyma0017s50	Gm17:405-1845	14-13-0	14-13-14	NOTEST	0.282425	0.444745	0.655112	-0.401003	0.688418	1	no
Glyma0018s50	Glyma0018s50	Glyma0018s50	Gm18:2484-40137	14-13-0	14-13-14	OK	3.02721	3.34382	0.14351	-0.197153	0.843708	0.964861	no
Glyma0021s00410	Glyma0021s00410	Glyma0021s00410	scaffold_21:663659-664067	14-13-0	14-13-14	NOTEST	0	0	0	0	1	1	no
Glyma0021s00426	Glyma0021s00426	Glyma0021s00426	scaffold_21:684712-690812	14-13-0	14-13-14	OK	0.627019	0.700447	0.159768	-0.0921582	0.926572	0.986189	no
Glyma0021s00443	Glyma0021s00443	Glyma0021s00443	scaffold_21:692299-694156	14-13-0	14-13-14	OK	1.01759	0.792388	-0.360871	0.272124	0.785527	0.945955	no
Glyma0021s00460	Glyma0021s00460	Glyma0021s00460	scaffold_21:716657-721100	14-13-0	14-13-14	OK	1.54556	1.90789	0.303853	-0.286489	0.774504	0.942621	no
Glyma0022s00200	Glyma0022s00200	Glyma0022s00200	scaffold_22:543542-558386	14-13-0	14-13-14	NOTEST	0	0	0	0	1	1	no
Glyma0022s00273	Glyma0022s00273	Glyma0022s00273	scaffold_22:561854-563467	14-13-0	14-13-14	NOTEST	0	0	0	0	1	1	no
Glyma0022s00346	Glyma0022s00346	Glyma0022s00346	scaffold_22:563726-567494	14-13-0	14-13-14	NOTEST	0	0	0	0	1	1	no
Glyma0022s00420	Glyma0022s00420	Glyma0022s00420	scaffold_22:722866-725638	14-13-0	14-13-14	OK	8.7394	7.9087	-0.144095	0.200042	0.841448	0.963863	no
Glyma0022s00430	Glyma0022s00430	Glyma0022s00430	scaffold_22:728729-731634	14-13-0	14-13-14	OK	0.177124	1.64298	3.21348	-2.11007	0.0348524	0.188466	no
Glyma0022s00443	Glyma0022s00443	Glyma0022s00443	scaffold_22:800491-802362	14-13-0	14-13-14	NOTEST	0	0	0	0	1	1	no
Glyma0022s00456	Glyma0022s00456	Glyma0022s00456	scaffold_22:942964-948274	14-13-0	14-13-14	OK	3.67755	3.96717	0.109367	-0.0751994	0.940056	0.989524	no
Glyma0022s00470	Glyma0022s00470	Glyma0022s00470	scaffold_22:942964-948274	14-13-0	14-13-14	OK	0	0.460966	1.79769e+308	1.79769e+308	0.347443	0.693376	no
Glyma0022s00480	Glyma0022s00480	Glyma0022s00480	scaffold_22:952859-956925	14-13-0	14-13-14	OK	0.798376	0.104241	-2.93715	2.29349	0.0218198	0.144596	no
Glyma0023s00410	Glyma0023s00410	Glyma0023s00410	scaffold_23:476540-479148	14-13-0	14-13-14	OK	5.7879	1.37314	-2.07556	2.22213	0.0262742	0.161335	no
Glyma0023s00515	Glyma0023s00515	Glyma0023s00515	scaffold_23:689759-693471	14-13-0	14-13-14	OK	0.804139	1.34236	0.739251	-0.526172	0.598769	0.867668	no
Glyma0023s00620	Glyma0023s00620	Glyma0023s00620	scaffold_23:694208-709536	14-13-0	14-13-14	OK	6.78809	4.50495	-0.591496	0.672448	0.501299	0.810371	no
Glyma0023s00670	Glyma0023s00670	Glyma0023s00670	scaffold_23:882926-883789	14-13-0	14-13-14	NOTEST	0	0	0	0	1	1	no
Glyma0024s00230	Glyma0024s00230	Glyma0024s00230	scaffold_24:8124-13007	14-13-0	14-13-14	OK	3.77572	6.07752	0.686732	-0.89025	0.373331	0.715718	no
Glyma0024s00245	Glyma0024s00245	Glyma0024s00245	scaffold_24:191608-197085	14-13-0	14-13-14	NOTEST	0	0	0	0	1	1	no
Glyma0024s00260	Glyma0024s00260	Glyma0024s00260	scaffold_24:201620-211808	14-13-0	14-13-14	OK	2.76986	4.2004	0.600711	-0.665894	0.505479	0.811917	no
Glyma0028s00210	Glyma0028s00210	Glyma0028s00210	scaffold_28:233807-247417	14-13-0	14-13-14	OK	16.782	8.66149	-0.954231	1.14882	0.25063	0.588082	no
Glyma0028s00260	Glyma0028s00260	Glyma0028s00260	scaffold_28:250538-253655	14-13-0	14-13-14	NOTEST	0	0	0	0	1	1	no
Glyma0041s00210	Glyma0041s00210	Glyma0041s00210	scaffold_41:27189-31640	14-13-0	14-13-14	OK	2.86737	6.53819	1.18916	-1.6089	0.107637	0.366352	no
Glyma0041s00225	Glyma0041s00225	Glyma0041s00225	scaffold_41:41035-42513	14-13-0	14-13-14	NOTEST	0	0	0	0	1	1	no
Glyma0041s00240	Glyma0041s00240	Glyma0041s00240	scaffold_41:45959-49258	14-13-0	14-13-14	OK	0.592877	0.792233	0.418192	-0.359553	0.719182	0.920785	no
Glyma0041s00260	Glyma0041s00260	Glyma0041s00260	scaffold_41:61732-66813	14-13-0	14-13-14	OK	3.88107	5.95373	0.617339	-0.797692	0.42505	0.758014	no
Glyma0041s00271	Glyma0041s00271	Glyma0041s00271	scaffold_41:70024-73638	14-13-0	14-13-14	OK	1.21683	1.24261	0.0302442	-0.0233964	0.981334	0.996736	no
Glyma0041s00280	Glyma0041s00280	Glyma0041s00280	scaffold_41:74056-78241	14-13-0	14-13-14	OK	4.71571	10.6225	1.17158	-1.50997	0.131051	0.41127	no
Glyma0041s00290	Glyma0041s00290	Glyma0041s00290	scaffold_41:85372-94695	14-13-0	14-13-14	OK	6.08847	0.781825	-2.96116	2.92852	0.0034058	0.0412207	yes
Glyma0041s00300	Glyma0041s00300	Glyma0041s00300	scaffold_41:96315-98827	14-13-0	14-13-14	OK	25.5452	15.8138	-0.691869	0.956029	0.339058	0.686837	no
Glyma0041s00310	Glyma0041s00310	Glyma0041s00310	scaffold_41:111899-114096	14-13-0	14-13-14	OK	0.149158	1.00077	2.7462	-1.84987	0.0643323	0.268677	no
Glyma0041s00331	Glyma0041s00331	Glyma0041s00331	scaffold_41:122453-123227	14-13-0	14-13-14	NOTEST	0	0	0	0	1	1	no
Glyma0041s00350	Glyma0041s00350	Glyma0041s00350	scaffold_41:149673-152360	14-13-0	14-13-14	NOTEST	0.230502	0.0588864	-1.96877	1.29301	0.196006	1	no
Glyma0041s00360	Glyma0041s00360	Glyma0041s00360	scaffold_41:165449-171887	14-13-0	14-13-14	NOTEST	0	0	0	0	1	1	no
Glyma0041s50	Glyma0041s50	Glyma0041s50	scaffold_41:4320-9458	14-13-0	14-13-14	NOTEST	0.139786	0.231674	0.728869	-0.624426	0.532348	1	no
Glyma0042s100	Glyma0042s100	Glyma0042s100	scaffold_42:281628-284115	14-13-0	14-13-14	OK	3.54441	1.08841	-1.70332	1.47048	0.141431	0.43055	no
Glyma0042s50	Glyma0042s50	Glyma0042s50	scaffold_42:265872-271658	14-13-0	14-13-14	NOTEST	0	0	0	0	1	1	no
Glyma0048s00220	Glyma0048s00220	Glyma0048s00220	scaffold_48:756-13042	14-13-0	14-13-14	NOTEST	0	0	0	0	1	1	no
Glyma0048s00230	Glyma0048s00230	Glyma0048s00230	scaffold_48:13316-18869	14-13-0	14-13-14	OK	1.16747	0.35969	-1.69856	0.0794302	0.93669	0.988515	no
Glyma0048s00240	Glyma0048s00240	Glyma0048s00240	scaffold_48:13316-18869	14-13-0	14-13-14	OK	4.25336	4.59872	0.112629	-0.150835	0.880106	0.974074	no
Glyma0048s00250	Glyma0048s00250	Glyma0048s00250	scaffold_48:24012-27245	14-13-0	14-13-14	OK	72.1878	34.2449	-1.07586	1.27873	0.200991	0.524485	no
Glyma0048s00260	Glyma0048s00260	Glyma0048s00260	scaffold_48:30256-31906	14-13-0	14-13-14	OK	1.2738	1.36935	0.10435	-0.102793	0.918127	0.983742	no
Glyma0048s00270	Glyma0048s00270	Glyma0048s00270	scaffold_48:32191-38154	14-13-0	14-13-14	OK	25.1625	6.20397	-2.02001	2.67773	0.00741238	0.0703546	no
Glyma0048s00280	Glyma0048s00280	Glyma0048s00280	scaffold_48:41005-46815	14-13-0	14-13-14	OK	8.02827	1.59543	-2.33114	2.61565	0.00890582	0.0798319	no
Glyma0048s00290	Glyma0048s00290	Glyma0048s00290	scaffold_48:51746-58457	14-13-0	14-13-14	OK	24.8965	12.7277	-0.967972	1.23275	0.217668	0.545789	no
Glyma0048s00300	Glyma0048s00300	Glyma0048s00300	scaffold_48:62047-65487	14-13-0	14-13-14	OK	48.0499	31.4368	-0.612078	0.639623	0.522418	0.822658	no
Glyma0048s00305	Glyma0048s00305	Glyma0048s00305	scaffold_48:62047-65487	14-13-0	14-13-14	OK	3.15819	1.87509	-0.752139	0.136518	0.891412	0.976858	no
Glyma0048s00310	Glyma0048s00310	Glyma0048s00310	scaffold_48:73905-75284	14-13-0	14-13-14	OK	0	0.584456	1.79769e+308	1.79769e+308	0.0341152	0.186209	no
Glyma0048s00320	Glyma0048s00320	Glyma0048s00320	scaffold_48:78264-89175	14-13-0	14-13-14	OK	4.61307	3.36777	-0.45393	0.567846	0.570139	0.852492	no
Glyma0048s00330	Glyma0048s00330	Glyma0048s00330	scaffold_48:92831-93821	14-13-0	14-13-14	OK	8.9414	15.3283	0.777629	-1.02853	0.303701	0.650265	no
Glyma0048s00340	Glyma0048s00340	Glyma0048s00340	scaffold_48:93959-105291	14-13-0	14-13-14	OK	5.19461	3.93323	-0.401298	0.545128	0.585666	0.86104	no
Glyma0048s00350	Glyma0048s00350	Glyma0048s00350	scaffold_48:115208-118892	14-13-0	14-13-14	NOTEST	0	0	0	0	1	1	no
Glyma0048s50	Glyma0048s50	Glyma0048s50	scaffold_48:756-13042	14-13-0	14-13-14	OK	1.75031	0.809381	-1.11272	1.09726	0.272528	0.615278	no
Glyma0053s100	Glyma0053s100	Glyma0053s100	scaffold_53:40277-44576	14-13-0	14-13-14	NOTEST	0	0	0	0	1	1	no
Glyma0053s150	Glyma0053s150	Glyma0053s150	scaffold_53:60537-64721	14-13-0	14-13-14	NOTEST	0	0	0	0	1	1	no
Glyma0053s200	Glyma0053s200	Glyma0053s200	scaffold_53:96299-97317	14-13-0	14-13-14	NOTEST	0	0	0	0	1	1	no
Glyma0053s50	Glyma0053s50	Glyma0053s50	scaffold_53:1663-6177	14-13-0	14-13-14	NOTEST	0	0	0	0	1	1	no
Glyma0057s100	Glyma0057s100	Glyma0057s100	scaffold_57:113347-115364	14-13-0	14-13-14	NOTEST	0	0	0	0	1	1	no
Glyma0057s50	Glyma0057s50	Glyma0057s50	scaffold_57:98459-99986	14-13-0	14-13-14	NOTEST	0	0	0	0	1	1	no
Glyma0060s00220	Glyma0060s00220	Glyma0060s00220	scaffold_60:12548-13243	14-13-0	14-13-14	NOTEST	0	0	0	0	1	1	no
Glyma0060s00320	Glyma0060s00320	Glyma0060s00320	scaffold_60:67387-68707	14-13-0	14-13-14	NOTEST	0	0	0	0	1	1	no
Glyma0060s00370	Glyma0060s00370	Glyma0060s00370	scaffold_60:104356-106210	14-13-0	14-13-14	NOTEST	0	0	0	0	1	1	no
Glyma0066s50	Glyma0066s50	Glyma0066s50	scaffold_66:161914-164286	14-13-0	14-13-14	NOTEST	0	0	0	0	1	1	no
Glyma0067s50	Glyma0067s50	Glyma0067s50	scaffold_67:44433-45302	14-13-0	14-13-14	NOTEST	0	0	0	0	1	1	no
Glyma0070s50	Glyma0070s50	Glyma0070s50	scaffold_70:35574-40055	14-13-0	14-13-14	OK	0.815908	1.65084	1.01673	-0.929284	0.352742	0.698026	no
Glyma0079s00200	Glyma0079s00200	Glyma0079s00200	scaffold_79:9482-9737	14-13-0	14-13-14	NOTEST	0	0	0	0	1	1	no
Glyma0079s00210	Glyma0079s00210	Glyma0079s00210	scaffold_79:16304-17051	14-13-0	14-13-14	OK	0.567133	0.0704639	-3.00873	1.54545	0.122236	0.393934	no
Glyma0079s00220	Glyma0079s00220	Glyma0079s00220	scaffold_79:17736-18009	14-13-0	14-13-14	NOTEST	0	0	0	0	1	1	no
Glyma0079s00230	Glyma0079s00230	Glyma0079s00230	scaffold_79:18723-19596	14-13-0	14-13-14	NOTEST	0	0	0	0	1	1	no
Glyma0079s00240	Glyma0079s00240	Glyma0079s00240	scaffold_79:20660-20912	14-13-0	14-13-14	NOTEST	0	0	0	0	1	1	no
Glyma0079s00250	Glyma0079s00250	Glyma0079s00250	scaffold_79:20961-21240	14-13-0	14-13-14	NOTEST	0	0	0	0	1	1	no
Glyma0079s00261	Glyma0079s00261	Glyma0079s00261	scaffold_79:22053-22326	14-13-0	14-13-14	NOTEST	0	0	0	0	1	1	no
Glyma0079s00270	Glyma0079s00270	Glyma0079s00270	scaffold_79:25288-26862	14-13-0	14-13-14	NOTEST	0	0	0	0	1	1	no
Glyma0079s00280	Glyma0079s00280	Glyma0079s00280	scaffold_79:27077-28537	14-13-0	14-13-14	NOTEST	0	0	0	0	1	1	no
Glyma0079s00290	Glyma0079s00290	Glyma0079s00290	scaffold_79:30187-34025	14-13-0	14-13-14	NOTEST	0.0759679	0	-1.79769e+308	-1.79769e+308	0.0666501	1	no
Glyma0079s00295	Glyma0079s00295	Glyma0079s00295	scaffold_79:54681-55767	14-13-0	14-13-14	NOTEST	0	0	0	0	1	1	no
Glyma0079s00300	Glyma0079s00300	Glyma0079s00300	scaffold_79:56320-57461	14-13-0	14-13-14	NOTEST	0	0	0	0	1	1	no
Glyma0079s00311	Glyma0079s00311	Glyma0079s00311	scaffold_79:123336-123591	14-13-0	14-13-14	NOTEST	0	0	0	0	1	1	no
Glyma0079s00320	Glyma0079s00320	Glyma0079s00320	scaffold_79:127744-128017	14-13-0	14-13-14	NOTEST	0	0	0	0	1	1	no
Glyma0079s00330	Glyma0079s00330	Glyma0079s00330	scaffold_79:128776-129055	14-13-0	14-13-14	NOTEST	0	0	0	0	1	1	no
Glyma0079s00340	Glyma0079s00340	Glyma0079s00340	scaffold_79:161645-161951	14-13-0	14-13-14	NOTEST	0	0	0	0	1	1	no
Glyma0079s00350	Glyma0079s00350	Glyma0079s00350	scaffold_79:164291-164540	14-13-0	14-13-14	NOTEST	0	0	0	0	1	1	no
Glyma0079s00360	Glyma0079s00360	Glyma0079s00360	scaffold_79:165133-166200	14-13-0	14-13-14	NOTEST	0	0	0	0	1	1	no
Glyma0079s00370	Glyma0079s00370	Glyma0079s00370	scaffold_79:167220-167502	14-13-0	14-13-14	NOTEST	0	0	0	0	1	1	no
Glyma0080s50	Glyma0080s50	Glyma0080s50	scaffold_80:33970-43733	14-13-0	14-13-14	NOTEST	0.346175	0.254615	-0.443187	0.354701	0.722813	1	no
Glyma0084s00210	Glyma0084s00210	Glyma0084s00210	scaffold_84:12274-20446	14-13-0	14-13-14	OK	128.858	52.6922	-1.29012	1.34929	0.177243	0.490671	no
Glyma0084s00230	Glyma0084s00230	Glyma0084s00230	scaffold_84:53420-54224	14-13-0	14-13-14	NOTEST	0	0	0	0	1	1	no
Glyma0086s00200	Glyma0086s00200	Glyma0086s00200	scaffold_86:18942-19924	14-13-0	14-13-14	NOTEST	0	0	0	0	1	1	no
Glyma0086s00250	Glyma0086s00250	Glyma0086s00250	scaffold_86:40393-43241	14-13-0	14-13-14	NOTEST	0	0	0	0	1	1	no
Glyma0086s00300	Glyma0086s00300	Glyma0086s00300	scaffold_86:91106-93419	14-13-0	14-13-14	NOTEST	0	0	0	0	1	1	no
Glyma0090s00200	Glyma0090s00200	Glyma0090s00200	scaffold_90:4631-8816	14-13-0	14-13-14	NOTEST	0.0432904	0.222517	2.3618	-1.81144	0.0700723	1	no
Glyma0090s00250	Glyma0090s00250	Glyma0090s00250	scaffold_90:22827-24762	14-13-0	14-13-14	NOTEST	0.101745	0.0246199	-2.04706	1.02458	0.305559	1	no
Glyma0090s00300	Glyma0090s00300	Glyma0090s00300	scaffold_90:24885-25615	14-13-0	14-13-14	OK	0	0.486986	1.79769e+308	1.79769e+308	0.0780415	0.301077	no
Glyma0090s00350	Glyma0090s00350	Glyma0090s00350	scaffold_90:44125-48952	14-13-0	14-13-14	NOTEST	0.0186623	0.00906709	-1.04141	0.492176	0.622595	1	no
Glyma0091s00230	Glyma0091s00230	Glyma0091s00230	scaffold_91:29255-30661	14-13-0	14-13-14	NOTEST	0	0	0	0	1	1	no
Glyma0092s00200	Glyma0092s00200	Glyma0092s00200	scaffold_92:4798-6418	14-13-0	14-13-14	OK	0.168212	2.32189	3.78695	-3.24787	0.00116272	0.0183694	yes
Glyma0092s00210	Glyma0092s00210	Glyma0092s00210	scaffold_92:9477-13080	14-13-0	14-13-14	OK	8.35804	4.26108	-0.971946	1.0846	0.278098	0.62157	no
Glyma0092s00230	Glyma0092s00230	Glyma0092s00230	scaffold_92:31216-33044	14-13-0	14-13-14	OK	24.4529	12.2624	-0.995772	1.33723	0.181149	0.496329	no
Glyma0092s00240	Glyma0092s00240	Glyma0092s00240	scaffold_92:54198-55797	14-13-0	14-13-14	OK	16.9256	32.772	0.953255	-1.21825	0.223129	0.553048	no
Glyma0096s100	Glyma0096s100	Glyma0096s100	scaffold_96:83938-84651	14-13-0	14-13-14	NOTEST	0	0	0	0	1	1	no
Glyma0096s50	Glyma0096s50	Glyma0096s50	scaffold_96:24926-29013	14-13-0	14-13-14	NOTEST	0	0	0	0	1	1	no
Glyma0101s00200	Glyma0101s00200	Glyma0101s00200	scaffold_101:409-679	14-13-0	14-13-14	NOTEST	0	0	0	0	1	1	no
Glyma0101s00210	Glyma0101s00210	Glyma0101s00210	scaffold_101:1190-2295	14-13-0	14-13-14	NOTEST	0	0	0	0	1	1	no
Glyma0101s00230	Glyma0101s00230	Glyma0101s00230	scaffold_101:16731-19812	14-13-0	14-13-14	NOTEST	0	0	0	0	1	1	no
Glyma0101s00241	Glyma0101s00241	Glyma0101s00241	scaffold_101:20750-20975	14-13-0	14-13-14	NOTEST	0	0	0	0	1	1	no
Glyma0101s00251	Glyma0101s00251	Glyma0101s00251	scaffold_101:42209-42999	14-13-0	14-13-14	NOTEST	0	0	0	0	1	1	no
Glyma0101s00260	Glyma0101s00260	Glyma0101s00260	scaffold_101:49116-50221	14-13-0	14-13-14	NOTEST	0	0	0	0	1	1	no
Glyma0103s100	Glyma0103s100	Glyma0103s100	scaffold_103:35985-36595	14-13-0	14-13-14	NOTEST	0.183455	0.101652	-0.851783	0.402555	0.687275	1	no
Glyma0103s50	Glyma0103s50	Glyma0103s50	scaffold_103:19207-24805	14-13-0	14-13-14	NOTEST	0	0.0421787	1.79769e+308	1.79769e+308	0.23975	1	no
Glyma0120s50	Glyma0120s50	Glyma0120s50	scaffold_120:55294-60491	14-13-0	14-13-14	NOTEST	0	0	0	0	1	1	no
Glyma0121s00200	Glyma0121s00200	Glyma0121s00200	scaffold_121:11730-14225	14-13-0	14-13-14	NOTEST	0	0	0	0	1	1	no
Glyma0121s00230	Glyma0121s00230	Glyma0121s00230	scaffold_121:28095-29760	14-13-0	14-13-14	NOTEST	0	0	0	0	1	1	no
Glyma0121s00240	Glyma0121s00240	Glyma0121s00240	scaffold_121:38140-41744	14-13-0	14-13-14	NOTEST	0	0	0	0	1	1	no
Glyma0128s50	Glyma0128s50	Glyma0128s50	scaffold_128:8755-9643	14-13-0	14-13-14	NOTEST	0	0	0	0	1	1	no
Glyma0146s00210	Glyma0146s00210	Glyma0146s00210	scaffold_146:13454-14636	14-13-0	14-13-14	NOTEST	0	0	0	0	1	1	no
Glyma0165s00200	Glyma0165s00200	Glyma0165s00200	scaffold_165:18150-20209	14-13-0	14-13-14	NOTEST	0	0	0	0	1	1	no
Glyma0165s50	Glyma0165s50	Glyma0165s50	scaffold_165:12356-14234	14-13-0	14-13-14	NOTEST	0	0	0	0	1	1	no
Glyma0169s00200	Glyma0169s00200	Glyma0169s00200	scaffold_169:6036-7668	14-13-0	14-13-14	OK	115.608	38.0235	-1.60428	1.81958	0.0688227	0.279544	no
Glyma0169s00210	Glyma0169s00210	Glyma0169s00210	scaffold_169:10271-14284	14-13-0	14-13-14	OK	246.996	65.9313	-1.90545	1.64273	0.10044	0.351408	no
Glyma0174s50	Glyma0174s50	Glyma0174s50	scaffold_174:28-832	14-13-0	14-13-14	NOTEST	0.367777	0.358258	-0.0378318	0.0262136	0.979087	1	no
Glyma0175s50	Glyma0175s50	Glyma0175s50	scaffold_175:15261-16399	14-13-0	14-13-14	NOTEST	0	0	0	0	1	1	no
Glyma0196s00210	Glyma0196s00210	Glyma0196s00210	scaffold_196:12292-15573	14-13-0	14-13-14	NOTEST	0.028932	0	-1.79769e+308	-1.79769e+308	0.122021	1	no
Glyma0196s130	Glyma0196s130	Glyma0196s130	scaffold_196:9547-9835	14-13-0	14-13-14	NOTEST	0	0	0	0	1	1	no
Glyma0196s50	Glyma0196s50	Glyma0196s50	scaffold_196:6280-7448	14-13-0	14-13-14	NOTEST	0.43161	0.217855	-0.986363	0.687435	0.491808	1	no
Glyma01g00210	Glyma01g00210	Glyma01g00210	Gm01:27642-27977	14-13-0	14-13-14	OK	4.63615	7.71568	0.734867	-0.449822	0.652839	0.893437	no
Glyma01g00241	Glyma01g00241	Glyma01g00241	Gm01:28504-30546	14-13-0	14-13-14	OK	0.394207	0.735848	0.900454	-0.761479	0.446371	0.775761	no
Glyma01g00270	Glyma01g00270	Glyma01g00270	Gm01:51480-61502	14-13-0	14-13-14	NOTEST	0.282841	0.0825824	-1.77608	1.27919	0.20083	1	no
Glyma01g00280	Glyma01g00280	Glyma01g00280	Gm01:61964-63428	14-13-0	14-13-14	NOTEST	0	0	0	0	1	1	no
Glyma01g00291	Glyma01g00291	Glyma01g00291	Gm01:69968-71359	14-13-0	14-13-14	OK	2.96466	1.86692	-0.667209	0.631087	0.527984	0.826319	no
Glyma01g00300	Glyma01g00300	Glyma01g00300	Gm01:90229-96102	14-13-0	14-13-14	OK	6.39869	4.19717	-0.608362	0.839492	0.401193	0.738851	no
Glyma01g00311	Glyma01g00311	Glyma01g00311	Gm01:111565-114809	14-13-0	14-13-14	NOTEST	0	0	0	0	1	1	no
Glyma01g00321	Glyma01g00321	Glyma01g00321	Gm01:116191-128024	14-13-0	14-13-14	OK	4.88463	3.23352	-0.595144	0.811554	0.417048	0.751777	no
Glyma01g00341	Glyma01g00341	Glyma01g00341	Gm01:143352-155722	14-13-0	14-13-14	OK	1.73141	0.903856	-0.937781	0.822587	0.410743	0.746737	no
Glyma01g00361	Glyma01g00361	Glyma01g00361	Gm01:157174-157917	14-13-0	14-13-14	NOTEST	0.103888	0	-1.79769e+308	-1.79769e+308	0.122021	1	no
Glyma01g00380	Glyma01g00380	Glyma01g00380	Gm01:170678-193544	14-13-0	14-13-14	OK	3.81607	4.39779	0.204691	-0.279323	0.779997	0.944368	no
Glyma01g00400	Glyma01g00400	Glyma01g00400	Gm01:196374-202050	14-13-0	14-13-14	OK	11.5571	9.47924	-0.285931	0.31168	0.755283	0.935721	no
Glyma01g00410	Glyma01g00410	Glyma01g00410	Gm01:205593-226050	14-13-0	14-13-14	OK	44.5241	10.9932	-2.01797	2.12427	0.0336479	0.184795	no
Glyma01g00420	Glyma01g00420	Glyma01g00420	Gm01:205593-226050	14-13-0	14-13-14	OK	0.265382	1.05487	1.99092	-0.340277	0.733648	0.92675	no
Glyma01g00430	Glyma01g00430	Glyma01g00430	Gm01:227158-238073	14-13-0	14-13-14	OK	41.9949	21.3635	-0.975067	0.938688	0.347891	0.693615	no
Glyma01g00440	Glyma01g00440	Glyma01g00440	Gm01:244255-244600	14-13-0	14-13-14	NOTEST	0	0	0	0	1	1	no
Glyma01g00450	Glyma01g00450	Glyma01g00450	Gm01:247079-274310	14-13-0	14-13-14	NOTEST	0	0	0	0	1	1	no
Glyma01g00460	Glyma01g00460	Glyma01g00460	Gm01:247079-274310	14-13-0	14-13-14	OK	2.88049	1.69956	-0.761152	0.675438	0.499398	0.809093	no
Glyma01g00470	Glyma01g00470	Glyma01g00470	Gm01:247079-274310	14-13-0	14-13-14	OK	6.5609	4.77359	-0.458819	0.487578	0.625849	0.881436	no
Glyma01g00481	Glyma01g00481	Glyma01g00481	Gm01:275569-278576	14-13-0	14-13-14	OK	0	0.929265	1.79769e+308	1.79769e+308	0.0177556	0.126598	no
Glyma01g00490	Glyma01g00490	Glyma01g00490	Gm01:281068-285680	14-13-0	14-13-14	NOTEST	0	0	0	0	1	1	no
Glyma01g00500	Glyma01g00500	Glyma01g00500	Gm01:285991-288741	14-13-0	14-13-14	OK	115.725	27.9388	-2.05036	2.54773	0.0108427	0.0916004	no
Glyma01g00510	Glyma01g00510	Glyma01g00510	Gm01:291440-297515	14-13-0	14-13-14	OK	3.46362	4.43441	0.356463	-0.469417	0.638772	0.887082	no
Glyma01g00520	Glyma01g00520	Glyma01g00520	Gm01:303945-308194	14-13-0	14-13-14	OK	2.43696	3.56687	0.549576	-0.535516	0.592293	0.864338	no
Glyma01g00530	Glyma01g00530	Glyma01g00530	Gm01:318581-323172	14-13-0	14-13-14	NOTEST	0	0	0	0	1	1	no
Glyma01g00541	Glyma01g00541	Glyma01g00541	Gm01:329083-331923	14-13-0	14-13-14	OK	4.84286	29.9853	2.63033	-3.26064	0.0011116	0.0177846	yes
Glyma01g00551	Glyma01g00551	Glyma01g00551	Gm01:333453-334355	14-13-0	14-13-14	NOTEST	0	0	0	0	1	1	no
Glyma01g00560	Glyma01g00560	Glyma01g00560	Gm01:335231-337098	14-13-0	14-13-14	OK	8.26888	29.3469	1.82745	-2.3839	0.0171304	0.123747	no
Glyma01g00570	Glyma01g00570	Glyma01g00570	Gm01:339899-343391	14-13-0	14-13-14	OK	36.4719	16.424	-1.15098	1.56651	0.11723	0.385807	no
Glyma01g00580	Glyma01g00580	Glyma01g00580	Gm01:344017-344620	14-13-0	14-13-14	NOTEST	0	0	0	0	1	1	no
Glyma01g00590	Glyma01g00590	Glyma01g00590	Gm01:346489-350011	14-13-0	14-13-14	OK	63.9728	16.6208	-1.94447	2.58172	0.00983089	0.0856236	no
Glyma01g00600	Glyma01g00600	Glyma01g00600	Gm01:363275-365404	14-13-0	14-13-14	OK	17.3653	22.1859	0.353434	-0.482014	0.629796	0.882896	no
Glyma01g00610	Glyma01g00610	Glyma01g00610	Gm01:369322-375842	14-13-0	14-13-14	OK	10.8692	8.99461	-0.273108	0.25313	0.800168	0.951039	no
Glyma01g00620	Glyma01g00620	Glyma01g00620	Gm01:369322-375842	14-13-0	14-13-14	NOTEST	0.0997099	0.149776	0.586997	-0.0871497	0.930553	1	no
Glyma01g00640	Glyma01g00640	Glyma01g00640	Gm01:380015-381810	14-13-0	14-13-14	OK	11.4425	6.0437	-0.920898	1.2663	0.205407	0.530316	no
Glyma01g00660	Glyma01g00660	Glyma01g00660	Gm01:384777-386898	14-13-0	14-13-14	NOTEST	0	0	0	0	1	1	no
Glyma01g00670	Glyma01g00670	Glyma01g00670	Gm01:387855-391000	14-13-0	14-13-14	OK	4.2652	1.6889	-1.33653	1.59961	0.109685	0.370773	no
Glyma01g00680	Glyma01g00680	Glyma01g00680	Gm01:391564-396978	14-13-0	14-13-14	OK	4.51466	4.12113	-0.131577	0.165541	0.868518	0.971471	no
Glyma01g00690	Glyma01g00690	Glyma01g00690	Gm01:397383-400581	14-13-0	14-13-14	OK	14.2059	10.0436	-0.500221	0.610821	0.541318	0.835171	no
Glyma01g00700	Glyma01g00700	Glyma01g00700	Gm01:411261-413277	14-13-0	14-13-14	NOTEST	0	0	0	0	1	1	no
Glyma01g00710	Glyma01g00710	Glyma01g00710	Gm01:415321-417655	14-13-0	14-13-14	OK	0.0986154	0.742519	2.91254	-1.94141	0.0522088	0.23758	no
Glyma01g00720	Glyma01g00720	Glyma01g00720	Gm01:418762-423973	14-13-0	14-13-14	OK	1.92591	2.07012	0.104171	-0.137458	0.890669	0.97675	no
Glyma01g00730	Glyma01g00730	Glyma01g00730	Gm01:425499-427881	14-13-0	14-13-14	OK	5.27437	3.91843	-0.428726	0.405092	0.68541	0.90692	no
Glyma01g00740	Glyma01g00740	Glyma01g00740	Gm01:429463-430748	14-13-0	14-13-14	OK	163.117	69.2722	-1.23556	1.35199	0.176377	0.48976	no
Glyma01g00750	Glyma01g00750	Glyma01g00750	Gm01:431176-433062	14-13-0	14-13-14	NOTEST	0.130153	0.246566	0.921769	-0.709805	0.477825	1	no
Glyma01g00760	Glyma01g00760	Glyma01g00760	Gm01:434429-437563	14-13-0	14-13-14	OK	21.2446	13.933	-0.608596	0.761688	0.446246	0.775682	no
Glyma01g00771	Glyma01g00771	Glyma01g00771	Gm01:438390-439678	14-13-0	14-13-14	OK	4.16309	14.2888	1.77916	-2.11877	0.0341097	0.186209	no
Glyma01g00780	Glyma01g00780	Glyma01g00780	Gm01:441913-445194	14-13-0	14-13-14	OK	0.665023	1.24764	0.907727	-0.827165	0.408144	0.744724	no
Glyma01g00790	Glyma01g00790	Glyma01g00790	Gm01:446961-452958	14-13-0	14-13-14	NOTEST	0.0233639	0.0228226	-0.0338138	0.0195047	0.984439	1	no
Glyma01g00805	Glyma01g00805	Glyma01g00805	Gm01:457615-459673	14-13-0	14-13-14	NOTEST	0	0.111208	1.79769e+308	1.79769e+308	0.0780415	1	no
Glyma01g00820	Glyma01g00820	Glyma01g00820	Gm01:464651-466721	14-13-0	14-13-14	OK	2.60727	16.858	2.69283	-3.44241	0.000576563	0.0107915	yes
Glyma01g00840	Glyma01g00840	Glyma01g00840	Gm01:505341-508290	14-13-0	14-13-14	NOTEST	0.0638915	0.104792	0.71383	-0.35694	0.721137	1	no
Glyma01g00850	Glyma01g00850	Glyma01g00850	Gm01:512025-517266	14-13-0	14-13-14	OK	4.47158	2.07838	-1.10532	1.44467	0.148551	0.443179	no
Glyma01g00860	Glyma01g00860	Glyma01g00860	Gm01:518296-520313	14-13-0	14-13-14	OK	12.9498	14.0393	0.116539	-0.13988	0.888755	0.976105	no
Glyma01g00870	Glyma01g00870	Glyma01g00870	Gm01:523808-529106	14-13-0	14-13-14	OK	15.4611	30.0029	0.956453	-1.01803	0.308665	0.655202	no
Glyma01g00880	Glyma01g00880	Glyma01g00880	Gm01:544620-550750	14-13-0	14-13-14	OK	0.316995	1.71521	2.43585	-2.23747	0.0252557	0.157257	no
Glyma01g00890	Glyma01g00890	Glyma01g00890	Gm01:559624-561661	14-13-0	14-13-14	OK	0.0378282	1.61022	5.41165	-3.85822	0.000114218	0.00310596	yes
Glyma01g00900	Glyma01g00900	Glyma01g00900	Gm01:562674-567038	14-13-0	14-13-14	NOTEST	0	0.0680208	1.79769e+308	1.79769e+308	0.200203	1	no
Glyma01g00910	Glyma01g00910	Glyma01g00910	Gm01:567202-572032	14-13-0	14-13-14	NOTEST	0.0292773	0.259893	3.15006	-2.11042	0.0348223	1	no
Glyma01g00920	Glyma01g00920	Glyma01g00920	Gm01:576437-580149	14-13-0	14-13-14	NOTEST	0	0	0	0	1	1	no
Glyma01g00930	Glyma01g00930	Glyma01g00930	Gm01:585699-587056	14-13-0	14-13-14	OK	0.612824	1.26184	1.04199	-0.905633	0.36513	0.709056	no
Glyma01g00940	Glyma01g00940	Glyma01g00940	Gm01:588160-598604	14-13-0	14-13-14	OK	40.9165	12.1693	-1.74944	2.11054	0.034812	0.188338	no
Glyma01g00950	Glyma01g00950	Glyma01g00950	Gm01:598924-599925	14-13-0	14-13-14	OK	0.901905	4.17095	2.20933	-2.18057	0.0292156	0.171586	no
Glyma01g00960	Glyma01g00960	Glyma01g00960	Gm01:604191-612760	14-13-0	14-13-14	OK	13.3672	6.85618	-0.963216	1.18355	0.23659	0.571012	no
Glyma01g00975	Glyma01g00975	Glyma01g00975	Gm01:613982-641941	14-13-0	14-13-14	OK	1.51364	1.52409	0.00992576	-0.0122573	0.99022	0.998255	no
Glyma01g00990	Glyma01g00990	Glyma01g00990	Gm01:643213-651111	14-13-0	14-13-14	OK	2.61624	2.22119	-0.23616	0.324399	0.745636	0.931936	no
Glyma01g01000	Glyma01g01000	Glyma01g01000	Gm01:652294-658333	14-13-0	14-13-14	OK	30.723	2.22187	-3.78947	4.00103	6.30677e-05	0.00195644	yes
Glyma01g01010	Glyma01g01010	Glyma01g01010	Gm01:663901-668594	14-13-0	14-13-14	OK	0.48666	4.07955	3.06742	-3.04326	0.00234031	0.0314561	yes
Glyma01g01020	Glyma01g01020	Glyma01g01020	Gm01:670826-674335	14-13-0	14-13-14	OK	49.1527	23.4985	-1.0647	1.36183	0.173253	0.485079	no
Glyma01g01030	Glyma01g01030	Glyma01g01030	Gm01:681416-683646	14-13-0	14-13-14	OK	0.149687	1.3418	3.16415	-2.76225	0.00574042	0.0589179	no
Glyma01g01050	Glyma01g01050	Glyma01g01050	Gm01:706987-708399	14-13-0	14-13-14	NOTEST	0.130717	0.0241587	-2.43584	1.23868	0.215465	1	no
Glyma01g01060	Glyma01g01060	Glyma01g01060	Gm01:729658-735082	14-13-0	14-13-14	OK	10.6708	11.6805	0.130422	-0.161528	0.871677	0.972287	no
Glyma01g01070	Glyma01g01070	Glyma01g01070	Gm01:735854-740661	14-13-0	14-13-14	NOTEST	0.0619246	0.24894	2.00721	-1.52058	0.128366	1	no
Glyma01g01080	Glyma01g01080	Glyma01g01080	Gm01:741674-745361	14-13-0	14-13-14	OK	0.94827	2.58007	1.44404	-1.72802	0.0839839	0.315493	no
Glyma01g01090	Glyma01g01090	Glyma01g01090	Gm01:746504-750472	14-13-0	14-13-14	NOTEST	0.0206745	0.061774	1.57915	-1.00977	0.312607	1	no
Glyma01g01101	Glyma01g01101	Glyma01g01101	Gm01:752181-756473	14-13-0	14-13-14	NOTEST	0	0	0	0	1	1	no
Glyma01g01110	Glyma01g01110	Glyma01g01110	Gm01:757751-761280	14-13-0	14-13-14	OK	8.95739	3.32205	-1.43101	1.94392	0.0519055	0.236741	no
Glyma01g01120	Glyma01g01120	Glyma01g01120	Gm01:762982-771636	14-13-0	14-13-14	OK	0.529984	2.87375	2.43892	-2.71104	0.00670725	0.0655063	no
Glyma01g01130	Glyma01g01130	Glyma01g01130	Gm01:773986-783534	14-13-0	14-13-14	NOTEST	0	0.043542	1.79769e+308	1.79769e+308	0.388649	1	no
Glyma01g01140	Glyma01g01140	Glyma01g01140	Gm01:773986-783534	14-13-0	14-13-14	OK	3.88189	5.06672	0.384292	-0.447322	0.654642	0.894352	no
Glyma01g01150	Glyma01g01150	Glyma01g01150	Gm01:786786-790850	14-13-0	14-13-14	OK	0.513959	0.26502	-0.955553	0.803649	0.4216	0.755065	no
Glyma01g01160	Glyma01g01160	Glyma01g01160	Gm01:801794-812173	14-13-0	14-13-14	NOTEST	0.0508755	0.0340684	-0.578535	0.413434	0.679288	1	no
Glyma01g01165	Glyma01g01165	Glyma01g01165	Gm01:813195-815449	14-13-0	14-13-14	NOTEST	0	0	0	0	1	1	no
Glyma01g01170	Glyma01g01170	Glyma01g01170	Gm01:817680-822876	14-13-0	14-13-14	OK	3.413	1.54477	-1.14365	1.15553	0.247875	0.584631	no
Glyma01g01180	Glyma01g01180	Glyma01g01180	Gm01:826828-831862	14-13-0	14-13-14	OK	54.3825	35.589	-0.611712	0.593964	0.552537	0.841723	no
Glyma01g01190	Glyma01g01190	Glyma01g01190	Gm01:837437-839839	14-13-0	14-13-14	OK	17.6898	14.1499	-0.322135	0.403237	0.686774	0.90749	no
Glyma01g01210	Glyma01g01210	Glyma01g01210	Gm01:841603-854009	14-13-0	14-13-14	OK	0.0913517	0.484205	2.40612	-2.03881	0.0414691	0.207718	no
Glyma01g01220	Glyma01g01220	Glyma01g01220	Gm01:861697-864316	14-13-0	14-13-14	OK	17.2749	12.6476	-0.449811	0.542457	0.587504	0.861592	no
Glyma01g01230	Glyma01g01230	Glyma01g01230	Gm01:864945-873519	14-13-0	14-13-14	OK	2.67001	2.76718	0.0515705	-0.0692327	0.944804	0.990487	no
Glyma01g01240	Glyma01g01240	Glyma01g01240	Gm01:882373-883583	14-13-0	14-13-14	OK	1.36385	0	-1.79769e+308	-1.79769e+308	0.0250334	0.156275	no
Glyma01g01251	Glyma01g01251	Glyma01g01251	Gm01:897328-899783	14-13-0	14-13-14	NOTEST	0	0.0193476	1.79769e+308	1.79769e+308	0.200203	1	no
Glyma01g01260	Glyma01g01260	Glyma01g01260	Gm01:901470-902792	14-13-0	14-13-14	OK	80.8051	74.8572	-0.110305	0.126064	0.899682	0.979175	no
Glyma01g01270	Glyma01g01270	Glyma01g01270	Gm01:908126-916913	14-13-0	14-13-14	OK	15.8681	13.6165	-0.220776	0.290322	0.77157	0.941558	no
Glyma01g01280	Glyma01g01280	Glyma01g01280	Gm01:919766-925870	14-13-0	14-13-14	OK	1.46657	2.15013	0.551975	-0.708947	0.478358	0.795791	no
Glyma01g01291	Glyma01g01291	Glyma01g01291	Gm01:934414-936646	14-13-0	14-13-14	OK	0.139973	0.783318	2.48445	-1.90551	0.0567132	0.249465	no
Glyma01g01300	Glyma01g01300	Glyma01g01300	Gm01:937313-940538	14-13-0	14-13-14	OK	1.3383	1.38615	0.0506817	-0.049854	0.960239	0.993181	no
Glyma01g01310	Glyma01g01310	Glyma01g01310	Gm01:952468-956652	14-13-0	14-13-14	OK	0.615063	18.82	4.93539	-5.30482	1.12784e-07	1.31501e-05	yes
Glyma01g01330	Glyma01g01330	Glyma01g01330	Gm01:959531-963281	14-13-0	14-13-14	OK	16.5753	16.3019	-0.0239956	0.0333248	0.973416	0.995669	no
Glyma01g01340	Glyma01g01340	Glyma01g01340	Gm01:966937-971332	14-13-0	14-13-14	OK	22.841	11.0174	-1.05184	1.42116	0.15527	0.454596	no
Glyma01g01350	Glyma01g01350	Glyma01g01350	Gm01:972898-978372	14-13-0	14-13-14	OK	4.22469	1.17062	-1.85157	2.04792	0.0405681	0.204922	no
Glyma01g01360	Glyma01g01360	Glyma01g01360	Gm01:980271-987366	14-13-0	14-13-14	OK	3.96457	2.415	-0.715145	0.938806	0.347831	0.693615	no
Glyma01g01365	Glyma01g01365	Glyma01g01365	Gm01:991596-992349	14-13-0	14-13-14	NOTEST	0	0	0	0	1	1	no
Glyma01g01370	Glyma01g01370	Glyma01g01370	Gm01:992662-997177	14-13-0	14-13-14	OK	2117.49	139.789	-3.92103	1.88175	0.0598699	0.257235	no
Glyma01g01380	Glyma01g01380	Glyma01g01380	Gm01:1000826-1006591	14-13-0	14-13-14	OK	16.901	20.8916	0.305813	-0.389424	0.696962	0.911874	no
Glyma01g01390	Glyma01g01390	Glyma01g01390	Gm01:1008758-1013501	14-13-0	14-13-14	OK	20.7366	15.3236	-0.436428	0.558195	0.576711	0.855585	no
Glyma01g01400	Glyma01g01400	Glyma01g01400	Gm01:1018233-1021659	14-13-0	14-13-14	OK	10.9893	0.642046	-4.09727	4.64704	3.36738e-06	0.000196311	yes
Glyma01g01410	Glyma01g01410	Glyma01g01410	Gm01:1023044-1025742	14-13-0	14-13-14	OK	111	67.8823	-0.70945	0.847332	0.39681	0.735757	no
Glyma01g01420	Glyma01g01420	Glyma01g01420	Gm01:1028982-1033386	14-13-0	14-13-14	NOTEST	0	0	0	0	1	1	no
Glyma01g01431	Glyma01g01431	Glyma01g01431	Gm01:1035987-1043507	14-13-0	14-13-14	OK	2.03287	1.58264	-0.361189	0.415096	0.678071	0.904255	no
Glyma01g01440	Glyma01g01440	Glyma01g01440	Gm01:1047147-1051040	14-13-0	14-13-14	OK	18.5902	7.04533	-1.39981	1.44038	0.14976	0.445615	no
Glyma01g01450	Glyma01g01450	Glyma01g01450	Gm01:1052601-1053493	14-13-0	14-13-14	OK	0.819119	2.50789	1.61433	-1.43421	0.151513	0.448986	no
Glyma01g01460	Glyma01g01460	Glyma01g01460	Gm01:1056819-1061665	14-13-0	14-13-14	OK	17.4713	11.8272	-0.562879	0.769672	0.441495	0.77142	no
Glyma01g01470	Glyma01g01470	Glyma01g01470	Gm01:1066130-1073350	14-13-0	14-13-14	OK	4.6274	6.54573	0.500352	-0.69043	0.489924	0.803466	no
Glyma01g01480	Glyma01g01480	Glyma01g01480	Gm01:1088031-1090516	14-13-0	14-13-14	OK	25.8196	6.53928	-1.98126	2.55963	0.0104785	0.0893886	no
Glyma01g01491	Glyma01g01491	Glyma01g01491	Gm01:1091316-1094909	14-13-0	14-13-14	OK	0.654599	0.877292	0.422444	-0.378511	0.705051	0.915688	no
Glyma01g01500	Glyma01g01500	Glyma01g01500	Gm01:1095456-1099007	14-13-0	14-13-14	NOTEST	0	0.378189	1.79769e+308	1.79769e+308	0.0416807	1	no
Glyma01g01510	Glyma01g01510	Glyma01g01510	Gm01:1125596-1130365	14-13-0	14-13-14	NOTEST	0.0695411	0	-1.79769e+308	-1.79769e+308	0.0794037	1	no
Glyma01g01521	Glyma01g01521	Glyma01g01521	Gm01:1133845-1137317	14-13-0	14-13-14	OK	0.902834	0.27751	-1.70192	1.51518	0.129726	0.409019	no
Glyma01g01530	Glyma01g01530	Glyma01g01530	Gm01:1138207-1139962	14-13-0	14-13-14	NOTEST	0	0	0	0	1	1	no
Glyma01g01550	Glyma01g01550	Glyma01g01550	Gm01:1143928-1150404	14-13-0	14-13-14	OK	0.138189	1.08022	2.96661	-2.66374	0.00772771	0.072379	no
Glyma01g01560	Glyma01g01560	Glyma01g01560	Gm01:1160591-1165098	14-13-0	14-13-14	NOTEST	0.068074	0.230658	1.76058	-1.45637	0.145289	1	no
Glyma01g01570	Glyma01g01570	Glyma01g01570	Gm01:1165649-1171110	14-13-0	14-13-14	OK	0.0664937	6.2885	6.56335	-5.73938	9.50259e-09	1.90309e-06	yes
Glyma01g01580	Glyma01g01580	Glyma01g01580	Gm01:1185427-1188776	14-13-0	14-13-14	NOTEST	0	0	0	0	1	1	no
Glyma01g01590	Glyma01g01590	Glyma01g01590	Gm01:1196921-1198375	14-13-0	14-13-14	OK	10.8579	6.69287	-0.698044	0.688988	0.490831	0.804112	no
Glyma01g01601	Glyma01g01601	Glyma01g01601	Gm01:1201663-1205929	14-13-0	14-13-14	OK	19.0968	6.76929	-1.49626	2.02864	0.0424951	0.210657	no
Glyma01g01610	Glyma01g01610	Glyma01g01610	Gm01:1207927-1212597	14-13-0	14-13-14	OK	9.28957	6.66884	-0.478176	0.658101	0.510473	0.814833	no
Glyma01g01620	Glyma01g01620	Glyma01g01620	Gm01:1215172-1220713	14-13-0	14-13-14	NOTEST	0	0	0	0	1	1	no
Glyma01g01630	Glyma01g01630	Glyma01g01630	Gm01:1224165-1228877	14-13-0	14-13-14	NOTEST	0	0	0	0	1	1	no
Glyma01g01641	Glyma01g01641	Glyma01g01641	Gm01:1231917-1233070	14-13-0	14-13-14	NOTEST	0	0	0	0	1	1	no
Glyma01g01651	Glyma01g01651	Glyma01g01651	Gm01:1235950-1236741	14-13-0	14-13-14	OK	0	2.08411	1.79769e+308	1.79769e+308	0.0306878	0.176367	no
Glyma01g01661	Glyma01g01661	Glyma01g01661	Gm01:1237990-1239189	14-13-0	14-13-14	NOTEST	0	0	0	0	1	1	no
Glyma01g01671	Glyma01g01671	Glyma01g01671	Gm01:1237990-1239189	14-13-0	14-13-14	NOTEST	0	0	0	0	1	1	no
Glyma01g01680	Glyma01g01680	Glyma01g01680	Gm01:1241352-1245024	14-13-0	14-13-14	NOTEST	0	0.00890039	1.79769e+308	1.79769e+308	0.200203	1	no
Glyma01g01690	Glyma01g01690	Glyma01g01690	Gm01:1252980-1257657	14-13-0	14-13-14	NOTEST	0	0	0	0	1	1	no
Glyma01g01700	Glyma01g01700	Glyma01g01700	Gm01:1273194-1280313	14-13-0	14-13-14	NOTEST	0	0	0	0	1	1	no
Glyma01g01715	Glyma01g01715	Glyma01g01715	Gm01:1283531-1285362	14-13-0	14-13-14	NOTEST	0	0	0	0	1	1	no
Glyma01g01730	Glyma01g01730	Glyma01g01730	Gm01:1289360-1298217	14-13-0	14-13-14	OK	2.25667	4.79476	1.08726	-1.40612	0.159688	0.461428	no
Glyma01g01740	Glyma01g01740	Glyma01g01740	Gm01:1307387-1317730	14-13-0	14-13-14	OK	3.18126	4.5436	0.514237	-0.62658	0.530934	0.82793	no
Glyma01g01750	Glyma01g01750	Glyma01g01750	Gm01:1319394-1322259	14-13-0	14-13-14	OK	2.27681	2.09095	-0.122857	0.157762	0.874645	0.973151	no
Glyma01g01770	Glyma01g01770	Glyma01g01770	Gm01:1332992-1336611	14-13-0	14-13-14	OK	8.33633	1.4361	-2.53726	2.74783	0.0059992	0.0608742	no
Glyma01g01780	Glyma01g01780	Glyma01g01780	Gm01:1342969-1347966	14-13-0	14-13-14	NOTEST	0.215843	0.289392	0.42304	-0.378034	0.705406	1	no
Glyma01g01790	Glyma01g01790	Glyma01g01790	Gm01:1357260-1362758	14-13-0	14-13-14	OK	0.457357	0.212651	-1.10483	0.909929	0.36286	0.707232	no
Glyma01g01805	Glyma01g01805	Glyma01g01805	Gm01:1377132-1387290	14-13-0	14-13-14	OK	4.56068	5.06367	0.150934	-0.177882	0.858815	0.968911	no
Glyma01g01820	Glyma01g01820	Glyma01g01820	Gm01:1391664-1392341	14-13-0	14-13-14	NOTEST	0	0	0	0	1	1	no
Glyma01g01830	Glyma01g01830	Glyma01g01830	Gm01:1394336-1398687	14-13-0	14-13-14	OK	30.5877	9.40085	-1.70209	2.04058	0.0412924	0.207321	no
Glyma01g01840	Glyma01g01840	Glyma01g01840	Gm01:1399714-1403226	14-13-0	14-13-14	OK	3.38959	3.75389	0.147275	-0.150718	0.880198	0.9741	no
Glyma01g01850	Glyma01g01850	Glyma01g01850	Gm01:1409321-1416077	14-13-0	14-13-14	OK	0.551878	2.8144	2.3504	-2.64679	0.00812603	0.0748536	no
Glyma01g01860	Glyma01g01860	Glyma01g01860	Gm01:1432595-1439227	14-13-0	14-13-14	OK	2.94118	5.57645	0.922952	-1.14331	0.252908	0.590611	no
Glyma01g01875	Glyma01g01875	Glyma01g01875	Gm01:1464340-1468599	14-13-0	14-13-14	OK	6.64329	7.25156	0.126393	-0.162419	0.870976	0.972017	no
Glyma01g01890	Glyma01g01890	Glyma01g01890	Gm01:1483775-1488285	14-13-0	14-13-14	OK	31.5828	14.34	-1.13909	1.47348	0.140623	0.429351	no
Glyma01g01900	Glyma01g01900	Glyma01g01900	Gm01:1489317-1495820	14-13-0	14-13-14	OK	17.7473	21.5289	0.278674	-0.278759	0.78043	0.944368	no
Glyma01g01910	Glyma01g01910	Glyma01g01910	Gm01:1500824-1504087	14-13-0	14-13-14	OK	223.423	29.4656	-2.92267	1.94177	0.0521646	0.237523	no
Glyma01g01920	Glyma01g01920	Glyma01g01920	Gm01:1504880-1510358	14-13-0	14-13-14	NOTEST	0.129838	0.158106	0.284183	-0.235305	0.813972	1	no
Glyma01g01930	Glyma01g01930	Glyma01g01930	Gm01:1511111-1512857	14-13-0	14-13-14	OK	3.12579	2.86382	-0.126285	0.103143	0.91785	0.983736	no
Glyma01g01940	Glyma01g01940	Glyma01g01940	Gm01:1514417-1515781	14-13-0	14-13-14	OK	19.0017	57.3763	1.59432	-2.06877	0.0385677	0.199957	no
Glyma01g01950	Glyma01g01950	Glyma01g01950	Gm01:1520439-1523995	14-13-0	14-13-14	OK	17.8061	9.54523	-0.899524	1.23894	0.215368	0.542865	no
Glyma01g01960	Glyma01g01960	Glyma01g01960	Gm01:1526003-1531395	14-13-0	14-13-14	OK	2.08937	1.66596	-0.32671	0.354458	0.722996	0.922098	no
Glyma01g01970	Glyma01g01970	Glyma01g01970	Gm01:1532782-1536385	14-13-0	14-13-14	OK	1.29966	1.80609	0.474731	-0.339678	0.734099	0.926973	no
Glyma01g01980	Glyma01g01980	Glyma01g01980	Gm01:1537139-1538153	14-13-0	14-13-14	NOTEST	0	0	0	0	1	1	no
Glyma01g01990	Glyma01g01990	Glyma01g01990	Gm01:1540562-1544363	14-13-0	14-13-14	OK	5.49289	6.6937	0.285239	-0.396014	0.692095	0.909841	no
Glyma01g02020	Glyma01g02020	Glyma01g02020	Gm01:1547972-1555699	14-13-0	14-13-14	LOWDATA	0	0	-1.79769e+308	0	1	1	no
Glyma01g02031	Glyma01g02031	Glyma01g02031	Gm01:1547972-1555699	14-13-0	14-13-14	NOTEST	0.306435	0.312021	0.0260613	-0.0246426	0.98034	1	no
Glyma01g02040	Glyma01g02040	Glyma01g02040	Gm01:1558849-1560186	14-13-0	14-13-14	OK	3.60128	2.40178	-0.584403	0.56235	0.573877	0.854172	no
Glyma01g02050	Glyma01g02050	Glyma01g02050	Gm01:1564664-1568931	14-13-0	14-13-14	OK	1.92781	1.98442	0.0417545	-0.03994	0.968141	0.994331	no
Glyma01g02060	Glyma01g02060	Glyma01g02060	Gm01:1577696-1587475	14-13-0	14-13-14	OK	15.2738	10.3828	-0.556859	0.673452	0.50066	0.810051	no
Glyma01g02070	Glyma01g02070	Glyma01g02070	Gm01:1596899-1599449	14-13-0	14-13-14	NOTEST	0	0.357298	1.79769e+308	1.79769e+308	0.0473656	1	no
Glyma01g02080	Glyma01g02080	Glyma01g02080	Gm01:1603349-1604459	14-13-0	14-13-14	NOTEST	0	0	0	0	1	1	no
Glyma01g02090	Glyma01g02090	Glyma01g02090	Gm01:1613117-1616592	14-13-0	14-13-14	OK	23.5652	16.5033	-0.5139	0.692687	0.488506	0.802535	no
Glyma01g02100	Glyma01g02100	Glyma01g02100	Gm01:1618639-1623534	14-13-0	14-13-14	OK	5.89071	7.75106	0.395951	-0.548831	0.583121	0.859286	no
Glyma01g02110	Glyma01g02110	Glyma01g02110	Gm01:1626846-1628287	14-13-0	14-13-14	OK	4.21528	12.3227	1.54762	-1.69574	0.0899347	0.328391	no
Glyma01g02120	Glyma01g02120	Glyma01g02120	Gm01:1633690-1637207	14-13-0	14-13-14	OK	19.4399	32.7427	0.752155	-0.98935	0.322492	0.669037	no
Glyma01g02130	Glyma01g02130	Glyma01g02130	Gm01:1642576-1643443	14-13-0	14-13-14	NOTEST	0	0	0	0	1	1	no
Glyma01g02140	Glyma01g02140	Glyma01g02140	Gm01:1648084-1649989	14-13-0	14-13-14	OK	0.146029	1.44988	3.3116	-2.50245	0.0123336	0.0999785	no
Glyma01g02150	Glyma01g02150	Glyma01g02150	Gm01:1653306-1656923	14-13-0	14-13-14	OK	53.9437	30.4437	-0.825312	0.996653	0.318933	0.665709	no
Glyma01g02160	Glyma01g02160	Glyma01g02160	Gm01:1662473-1663732	14-13-0	14-13-14	NOTEST	0	0.197297	1.79769e+308	1.79769e+308	0.117179	1	no
Glyma01g02171	Glyma01g02171	Glyma01g02171	Gm01:1673102-1673545	14-13-0	14-13-14	NOTEST	0	0.157742	1.79769e+308	1.79769e+308	0.200203	1	no
Glyma01g02180	Glyma01g02180	Glyma01g02180	Gm01:1688059-1691046	14-13-0	14-13-14	OK	36.0006	6.54064	-2.46052	3.12392	0.00178459	0.0256503	yes
Glyma01g02190	Glyma01g02190	Glyma01g02190	Gm01:1721264-1722533	14-13-0	14-13-14	OK	10.0937	2.35252	-2.10117	2.28726	0.0221806	0.145897	no
Glyma01g02200	Glyma01g02200	Glyma01g02200	Gm01:1733389-1734562	14-13-0	14-13-14	OK	11.066	5.19472	-1.09102	1.42709	0.153554	0.452084	no
Glyma01g02215	Glyma01g02215	Glyma01g02215	Gm01:1735229-1736763	14-13-0	14-13-14	OK	12.8378	15.7168	0.291916	-0.375465	0.707315	0.916305	no
Glyma01g02230	Glyma01g02230	Glyma01g02230	Gm01:1744296-1745378	14-13-0	14-13-14	OK	28.7062	6.93854	-2.04866	2.40675	0.0160954	0.119019	no
Glyma01g02235	Glyma01g02235	Glyma01g02235	Gm01:1747643-1748703	14-13-0	14-13-14	NOTEST	0	0	0	0	1	1	no
Glyma01g02240	Glyma01g02240	Glyma01g02240	Gm01:1748705-1753242	14-13-0	14-13-14	OK	1.80966	1.87549	0.0515454	-0.0625627	0.950115	0.991468	no
Glyma01g02251	Glyma01g02251	Glyma01g02251	Gm01:1771935-1773875	14-13-0	14-13-14	OK	24.8902	22.6148	-0.138313	0.16519	0.868795	0.971528	no
Glyma01g02260	Glyma01g02260	Glyma01g02260	Gm01:1781864-1782671	14-13-0	14-13-14	NOTEST	0.104776	0	-1.79769e+308	-1.79769e+308	0.122021	1	no
Glyma01g02270	Glyma01g02270	Glyma01g02270	Gm01:1782704-1786280	14-13-0	14-13-14	OK	1.62808	4.03291	1.30865	-1.13056	0.258239	0.597677	no
Glyma01g02280	Glyma01g02280	Glyma01g02280	Gm01:1788990-1791158	14-13-0	14-13-14	OK	5.91848	6.24589	0.0776788	-0.10707	0.914733	0.982468	no
Glyma01g02290	Glyma01g02290	Glyma01g02290	Gm01:1803011-1804370	14-13-0	14-13-14	OK	7.91253	4.34027	-0.866354	1.1259	0.260206	0.600308	no
Glyma01g02295	Glyma01g02295	Glyma01g02295	Gm01:1813531-1816390	14-13-0	14-13-14	NOTEST	0	0	0	0	1	1	no
Glyma01g02300	Glyma01g02300	Glyma01g02300	Gm01:1817115-1820935	14-13-0	14-13-14	NOTEST	0.214667	0.307165	0.516915	-0.420728	0.673954	1	no
Glyma01g02310	Glyma01g02310	Glyma01g02310	Gm01:1822915-1823629	14-13-0	14-13-14	NOTEST	0	0	0	0	1	1	no
Glyma01g02321	Glyma01g02321	Glyma01g02321	Gm01:1825753-1835393	14-13-0	14-13-14	OK	14.6646	11.7052	-0.32519	0.388891	0.697356	0.912037	no
Glyma01g02330	Glyma01g02330	Glyma01g02330	Gm01:1838125-1845872	14-13-0	14-13-14	OK	1.48958	3.54942	1.25268	-1.5609	0.118546	0.388361	no
Glyma01g02340	Glyma01g02340	Glyma01g02340	Gm01:1865275-1868142	14-13-0	14-13-14	OK	1.6327	5.98046	1.873	-2.42154	0.0154548	0.116179	no
Glyma01g02350	Glyma01g02350	Glyma01g02350	Gm01:1886187-1890464	14-13-0	14-13-14	OK	6.13637	10.3383	0.752544	-0.899764	0.368246	0.711498	no
Glyma01g02360	Glyma01g02360	Glyma01g02360	Gm01:1905414-1906471	14-13-0	14-13-14	OK	10.2162	0.675484	-3.91879	3.91352	9.0959e-05	0.00259798	yes
Glyma01g02380	Glyma01g02380	Glyma01g02380	Gm01:1929549-1932204	14-13-0	14-13-14	OK	0.796667	1.35289	0.763992	-0.784719	0.432618	0.763686	no
Glyma01g02390	Glyma01g02390	Glyma01g02390	Gm01:1940680-1942652	14-13-0	14-13-14	OK	2.13487	5.93264	1.47452	-1.56571	0.117416	0.386023	no
Glyma01g02400	Glyma01g02400	Glyma01g02400	Gm01:1969464-1975586	14-13-0	14-13-14	OK	101.104	46.4126	-1.12325	0.850439	0.395081	0.734438	no
Glyma01g02420	Glyma01g02420	Glyma01g02420	Gm01:1977639-1982632	14-13-0	14-13-14	OK	6.75732	5.83653	-0.211341	0.290863	0.771156	0.941403	no
Glyma01g02435	Glyma01g02435	Glyma01g02435	Gm01:1989327-1993130	14-13-0	14-13-14	NOTEST	0	0	0	0	1	1	no
Glyma01g02451	Glyma01g02451	Glyma01g02451	Gm01:1998300-2009388	14-13-0	14-13-14	NOTEST	0	0.170911	1.79769e+308	1.79769e+308	0.18406	1	no
Glyma01g02465	Glyma01g02465	Glyma01g02465	Gm01:1998300-2009388	14-13-0	14-13-14	OK	7.7861	7.34431	-0.0842739	0.0747363	0.940425	0.989677	no
Glyma01g02480	Glyma01g02480	Glyma01g02480	Gm01:2010099-2018636	14-13-0	14-13-14	OK	58.3869	16.4097	-1.8311	1.991	0.0464806	0.221729	no
Glyma01g02510	Glyma01g02510	Glyma01g02510	Gm01:2033797-2034792	14-13-0	14-13-14	OK	0.278495	0.686076	1.30072	-1.01924	0.308087	0.654834	no
Glyma01g02525	Glyma01g02525	Glyma01g02525	Gm01:2038298-2054214	14-13-0	14-13-14	NOTEST	0	0	0	0	1	1	no
Glyma01g02540	Glyma01g02540	Glyma01g02540	Gm01:2065426-2066242	14-13-0	14-13-14	NOTEST	0	0	0	0	1	1	no
Glyma01g02550	Glyma01g02550	Glyma01g02550	Gm01:2067340-2068207	14-13-0	14-13-14	NOTEST	0	0	0	0	1	1	no
Glyma01g02560	Glyma01g02560	Glyma01g02560	Gm01:2089449-2097520	14-13-0	14-13-14	OK	0.0850049	0.978619	3.52513	-2.99378	0.00275548	0.035227	yes
Glyma01g02570	Glyma01g02570	Glyma01g02570	Gm01:2102150-2107115	14-13-0	14-13-14	OK	5.27385	6.77381	0.36111	-0.482899	0.629168	0.882743	no
Glyma01g02580	Glyma01g02580	Glyma01g02580	Gm01:2119856-2122838	14-13-0	14-13-14	OK	0.852849	1.34258	0.654646	-0.627234	0.530506	0.827924	no
Glyma01g02610	Glyma01g02610	Glyma01g02610	Gm01:2137616-2139436	14-13-0	14-13-14	OK	0.715256	0.472257	-0.598888	0.549175	0.582885	0.859161	no
Glyma01g02620	Glyma01g02620	Glyma01g02620	Gm01:2146050-2152449	14-13-0	14-13-14	OK	0.0520872	1.26489	4.60194	-4.10181	4.09925e-05	0.00139007	yes
Glyma01g02630	Glyma01g02630	Glyma01g02630	Gm01:2156930-2161301	14-13-0	14-13-14	OK	6.21187	4.87857	-0.348568	0.462327	0.643847	0.889257	no
Glyma01g02640	Glyma01g02640	Glyma01g02640	Gm01:2168404-2173706	14-13-0	14-13-14	OK	5.67736	10.727	0.917953	-1.19404	0.232462	0.5661	no
Glyma01g02660	Glyma01g02660	Glyma01g02660	Gm01:2184322-2188837	14-13-0	14-13-14	OK	10.269	6.784	-0.59809	0.749608	0.453491	0.780129	no
Glyma01g02670	Glyma01g02670	Glyma01g02670	Gm01:2192165-2194689	14-13-0	14-13-14	OK	14.2082	2.61034	-2.44441	3.12578	0.00177336	0.0255397	yes
Glyma01g02691	Glyma01g02691	Glyma01g02691	Gm01:2199760-2201127	14-13-0	14-13-14	OK	1.01426	0.170258	-2.57463	1.99779	0.0457394	0.219794	no
Glyma01g02710	Glyma01g02710	Glyma01g02710	Gm01:2204078-2206129	14-13-0	14-13-14	NOTEST	0	0	0	0	1	1	no
Glyma01g02720	Glyma01g02720	Glyma01g02720	Gm01:2204078-2206129	14-13-0	14-13-14	OK	49.8993	106.935	1.09965	-1.25655	0.208917	0.534354	no
Glyma01g02740	Glyma01g02740	Glyma01g02740	Gm01:2209772-2211864	14-13-0	14-13-14	NOTEST	0.135944	0.0710451	-0.936206	0.682576	0.494875	1	no
Glyma01g02750	Glyma01g02750	Glyma01g02750	Gm01:2228817-2234268	14-13-0	14-13-14	OK	0.833032	0.879336	0.0780415	-0.0764284	0.939078	0.989155	no
Glyma01g02760	Glyma01g02760	Glyma01g02760	Gm01:2239126-2244480	14-13-0	14-13-14	NOTEST	0.0830287	0.337646	2.02383	-1.61946	0.105348	1	no
Glyma01g02780	Glyma01g02780	Glyma01g02780	Gm01:2274285-2279870	14-13-0	14-13-14	OK	6.90797	17.1782	1.31425	-1.68851	0.0913137	0.331294	no
Glyma01g02790	Glyma01g02790	Glyma01g02790	Gm01:2280412-2286189	14-13-0	14-13-14	OK	0.169239	2.56619	3.92249	-3.69372	0.000220994	0.00518536	yes
Glyma01g02800	Glyma01g02800	Glyma01g02800	Gm01:2289835-2296934	14-13-0	14-13-14	OK	2.65332	2.19992	-0.270346	0.346736	0.72879	0.924683	no
Glyma01g02810	Glyma01g02810	Glyma01g02810	Gm01:2296971-2301386	14-13-0	14-13-14	NOTEST	0.0667688	0.270751	2.01972	-1.68503	0.0919832	1	no
Glyma01g02820	Glyma01g02820	Glyma01g02820	Gm01:2307249-2310533	14-13-0	14-13-14	OK	14.0584	11.808	-0.251661	0.349551	0.726676	0.923934	no
Glyma01g02830	Glyma01g02830	Glyma01g02830	Gm01:2320650-2323809	14-13-0	14-13-14	NOTEST	0	0	0	0	1	1	no
Glyma01g02840	Glyma01g02840	Glyma01g02840	Gm01:2324547-2332128	14-13-0	14-13-14	OK	26.219	2.57134	-3.35002	3.65907	0.000253134	0.00576578	yes
Glyma01g02850	Glyma01g02850	Glyma01g02850	Gm01:2336135-2340956	14-13-0	14-13-14	OK	67.8413	32.9984	-1.03977	1.00381	0.315471	0.662585	no
Glyma01g02880	Glyma01g02880	Glyma01g02880	Gm01:2360197-2366406	14-13-0	14-13-14	OK	13.723	2.53966	-2.43389	2.42411	0.015346	0.115597	no
Glyma01g02890	Glyma01g02890	Glyma01g02890	Gm01:2373884-2395585	14-13-0	14-13-14	OK	2.4369	2.47678	0.0234176	-0.0322707	0.974256	0.995669	no
Glyma01g02900	Glyma01g02900	Glyma01g02900	Gm01:2398001-2407368	14-13-0	14-13-14	OK	1.5598	1.14769	-0.442626	0.393801	0.693728	0.910309	no
Glyma01g02920	Glyma01g02920	Glyma01g02920	Gm01:2419558-2420449	14-13-0	14-13-14	OK	2.20438	2.71314	0.299591	-0.305358	0.760094	0.937988	no
Glyma01g02930	Glyma01g02930	Glyma01g02930	Gm01:2424756-2426304	14-13-0	14-13-14	OK	0.075413	0.448837	2.57331	-1.70453	0.0882823	0.324408	no
Glyma01g02941	Glyma01g02941	Glyma01g02941	Gm01:2426753-2435682	14-13-0	14-13-14	OK	3.15805	1.93841	-0.704161	0.938545	0.347965	0.693615	no
Glyma01g02950	Glyma01g02950	Glyma01g02950	Gm01:2448362-2450139	14-13-0	14-13-14	OK	51.8822	58.0238	0.161406	-0.170735	0.864432	0.970213	no
Glyma01g02963	Glyma01g02963	Glyma01g02963	Gm01:2455817-2458234	14-13-0	14-13-14	NOTEST	0	0	0	0	1	1	no
Glyma01g02976	Glyma01g02976	Glyma01g02976	Gm01:2465269-2466518	14-13-0	14-13-14	NOTEST	0	0	0	0	1	1	no
Glyma01g02990	Glyma01g02990	Glyma01g02990	Gm01:2477179-2479230	14-13-0	14-13-14	OK	1.25327	5.73832	2.19494	-2.3346	0.0195642	0.135108	no
Glyma01g03005	Glyma01g03005	Glyma01g03005	Gm01:2495435-2497366	14-13-0	14-13-14	OK	0.0876905	0.836985	3.25471	-2.56574	0.0102956	0.0883158	no
Glyma01g03020	Glyma01g03020	Glyma01g03020	Gm01:2497579-2500150	14-13-0	14-13-14	OK	20.1609	10.2225	-0.979819	1.34895	0.177352	0.490671	no
Glyma01g03030	Glyma01g03030	Glyma01g03030	Gm01:2522226-2524933	14-13-0	14-13-14	OK	2.44099	1.49245	-0.709787	0.768135	0.442407	0.772214	no
Glyma01g03040	Glyma01g03040	Glyma01g03040	Gm01:2530562-2537849	14-13-0	14-13-14	OK	0.0824921	0.456389	2.46794	-1.89672	0.0578645	0.252506	no
Glyma01g03050	Glyma01g03050	Glyma01g03050	Gm01:2543533-2544636	14-13-0	14-13-14	NOTEST	0	0	0	0	1	1	no
Glyma01g03060	Glyma01g03060	Glyma01g03060	Gm01:2551019-2553294	14-13-0	14-13-14	OK	0	3.49104	1.79769e+308	1.79769e+308	0.00410332	0.0469113	yes
Glyma01g03070	Glyma01g03070	Glyma01g03070	Gm01:2585415-2586673	14-13-0	14-13-14	OK	333.599	697.6	1.06428	-0.770642	0.440919	0.771048	no
Glyma01g03090	Glyma01g03090	Glyma01g03090	Gm01:2600263-2605224	14-13-0	14-13-14	OK	10.5639	0.753977	-3.80847	4.19149	2.77128e-05	0.00104026	yes
Glyma01g03100	Glyma01g03100	Glyma01g03100	Gm01:2633476-2636259	14-13-0	14-13-14	OK	4.19673	4.37886	0.0612874	-0.0801696	0.936102	0.988515	no
Glyma01g03110	Glyma01g03110	Glyma01g03110	Gm01:2667742-2669323	14-13-0	14-13-14	OK	0	0.889975	1.79769e+308	1.79769e+308	0.0288387	0.170327	no
Glyma01g03120	Glyma01g03120	Glyma01g03120	Gm01:2683531-2686001	14-13-0	14-13-14	OK	3.2615	8.38365	1.36204	-1.68541	0.0919096	0.332606	no
Glyma01g03130	Glyma01g03130	Glyma01g03130	Gm01:2686762-2690092	14-13-0	14-13-14	OK	4.6079	3.00609	-0.616221	0.806588	0.419904	0.753693	no
Glyma01g03140	Glyma01g03140	Glyma01g03140	Gm01:2696508-2700015	14-13-0	14-13-14	LOWDATA	0	0	-2.29987	0	1	1	no
Glyma01g03150	Glyma01g03150	Glyma01g03150	Gm01:2696508-2700015	14-13-0	14-13-14	OK	29.5548	6.00205	-2.29987	2.50924	0.0120991	0.0987832	no
Glyma01g03160	Glyma01g03160	Glyma01g03160	Gm01:2716401-2724818	14-13-0	14-13-14	OK	37.2484	7.61314	-2.29061	2.38073	0.0172784	0.124468	no
Glyma01g03180	Glyma01g03180	Glyma01g03180	Gm01:2725857-2728953	14-13-0	14-13-14	OK	66.6196	25.8212	-1.36739	1.57938	0.114249	0.380784	no
Glyma01g03190	Glyma01g03190	Glyma01g03190	Gm01:2731349-2739464	14-13-0	14-13-14	OK	3.25428	1.43861	-1.17766	1.37627	0.168738	0.476979	no
Glyma01g03200	Glyma01g03200	Glyma01g03200	Gm01:2741979-2744444	14-13-0	14-13-14	NOTEST	0	0	0	0	1	1	no
Glyma01g03210	Glyma01g03210	Glyma01g03210	Gm01:2749285-2751625	14-13-0	14-13-14	OK	0.30026	1.50298	2.32355	-2.26955	0.0232352	0.149766	no
Glyma01g03220	Glyma01g03220	Glyma01g03220	Gm01:2752604-2755538	14-13-0	14-13-14	OK	7.48919	5.72499	-0.387536	0.532208	0.594582	0.865609	no
Glyma01g03240	Glyma01g03240	Glyma01g03240	Gm01:2765558-2766634	14-13-0	14-13-14	OK	0	1.09372	1.79769e+308	1.79769e+308	0.0323042	0.180669	no
Glyma01g03260	Glyma01g03260	Glyma01g03260	Gm01:2784884-2792465	14-13-0	14-13-14	OK	1083.01	146.2	-2.88903	1.23116	0.218264	0.546812	no
Glyma01g03270	Glyma01g03270	Glyma01g03270	Gm01:2803081-2807357	14-13-0	14-13-14	OK	5.12324	6.33945	0.307301	-0.415203	0.677994	0.904186	no
Glyma01g03281	Glyma01g03281	Glyma01g03281	Gm01:2811064-2811250	14-13-0	14-13-14	NOTEST	0	0	0	0	1	1	no
Glyma01g03290	Glyma01g03290	Glyma01g03290	Gm01:2814292-2814876	14-13-0	14-13-14	NOTEST	0	0	0	0	1	1	no
Glyma01g03301	Glyma01g03301	Glyma01g03301	Gm01:2815679-2817384	14-13-0	14-13-14	NOTEST	0	0.0689864	1.79769e+308	1.79769e+308	0.117179	1	no
Glyma01g03310	Glyma01g03310	Glyma01g03310	Gm01:2820282-2822588	14-13-0	14-13-14	NOTEST	0	0	0	0	1	1	no
Glyma01g03321	Glyma01g03321	Glyma01g03321	Gm01:2825602-2830330	14-13-0	14-13-14	NOTEST	0	0	0	0	1	1	no
Glyma01g03330	Glyma01g03330	Glyma01g03330	Gm01:2836050-2840937	14-13-0	14-13-14	OK	5.44413	7.93274	0.543119	-0.74589	0.455734	0.781777	no
Glyma01g03340	Glyma01g03340	Glyma01g03340	Gm01:2843206-2846996	14-13-0	14-13-14	NOTEST	0	0.0322544	1.79769e+308	1.79769e+308	0.200203	1	no
Glyma01g03360	Glyma01g03360	Glyma01g03360	Gm01:2857640-2860816	14-13-0	14-13-14	OK	24.4194	1.79986	-3.76207	3.33116	0.000864843	0.0145981	yes
Glyma01g03371	Glyma01g03371	Glyma01g03371	Gm01:2868081-2871591	14-13-0	14-13-14	NOTEST	0.336702	0.345327	0.0364912	-0.021304	0.983003	1	no
Glyma01g03380	Glyma01g03380	Glyma01g03380	Gm01:2872827-2875983	14-13-0	14-13-14	OK	9.9105	8.61442	-0.202204	0.273388	0.784555	0.945721	no
Glyma01g03390	Glyma01g03390	Glyma01g03390	Gm01:2879282-2884236	14-13-0	14-13-14	OK	1.15989	1.69611	0.548242	-0.588266	0.556354	0.844365	no
Glyma01g03400	Glyma01g03400	Glyma01g03400	Gm01:2895941-2899203	14-13-0	14-13-14	NOTEST	0.0470427	0.0234781	-1.00266	0.473859	0.635601	1	no
Glyma01g03410	Glyma01g03410	Glyma01g03410	Gm01:2907608-2911173	14-13-0	14-13-14	NOTEST	0	0	0	0	1	1	no
Glyma01g03420	Glyma01g03420	Glyma01g03420	Gm01:2912689-2918182	14-13-0	14-13-14	OK	1.58128	1.85262	0.228474	-0.228404	0.819332	0.956639	no
Glyma01g03430	Glyma01g03430	Glyma01g03430	Gm01:2918596-2922169	14-13-0	14-13-14	OK	13.8404	8.51853	-0.700207	0.938036	0.348226	0.693781	no
Glyma01g03450	Glyma01g03450	Glyma01g03450	Gm01:2932298-2941083	14-13-0	14-13-14	NOTEST	0	0	0	0	1	1	no
Glyma01g03470	Glyma01g03470	Glyma01g03470	Gm01:2983533-2985063	14-13-0	14-13-14	OK	1.93036	1.13666	-0.764074	0.688782	0.49096	0.804154	no
Glyma01g03480	Glyma01g03480	Glyma01g03480	Gm01:2985878-2990726	14-13-0	14-13-14	OK	1.67904	6.1358	1.86962	-2.27639	0.0228226	0.148428	no
Glyma01g03490	Glyma01g03490	Glyma01g03490	Gm01:2997710-3004125	14-13-0	14-13-14	OK	5.74828	8.05713	0.487136	-0.671211	0.502086	0.810546	no
Glyma01g03500	Glyma01g03500	Glyma01g03500	Gm01:3020777-3022182	14-13-0	14-13-14	OK	7.2978	10.9598	0.586688	-0.811441	0.417113	0.75181	no
Glyma01g03530	Glyma01g03530	Glyma01g03530	Gm01:3043747-3048064	14-13-0	14-13-14	OK	16.823	19.6933	0.22727	-0.298776	0.765111	0.939477	no
Glyma01g03540	Glyma01g03540	Glyma01g03540	Gm01:3063216-3065991	14-13-0	14-13-14	OK	12.2126	10.9178	-0.161689	0.224604	0.822287	0.957901	no
Glyma01g03550	Glyma01g03550	Glyma01g03550	Gm01:3067764-3073752	14-13-0	14-13-14	OK	26.7353	9.6289	-1.47331	1.99844	0.0456689	0.219706	no
Glyma01g03570	Glyma01g03570	Glyma01g03570	Gm01:3082363-3083185	14-13-0	14-13-14	OK	290.95	142.501	-1.0298	0.966549	0.33377	0.681062	no
Glyma01g03580	Glyma01g03580	Glyma01g03580	Gm01:3090805-3093412	14-13-0	14-13-14	NOTEST	0	0.0328029	1.79769e+308	1.79769e+308	0.29545	1	no
Glyma01g03590	Glyma01g03590	Glyma01g03590	Gm01:3106546-3108525	14-13-0	14-13-14	OK	20.6837	22.2291	0.103957	-0.142799	0.886449	0.975675	no
Glyma01g03600	Glyma01g03600	Glyma01g03600	Gm01:3114320-3119083	14-13-0	14-13-14	OK	10.9639	3.55203	-1.62605	1.76726	0.0771847	0.299604	no
Glyma01g03610	Glyma01g03610	Glyma01g03610	Gm01:3120584-3124029	14-13-0	14-13-14	OK	28.0289	14.4287	-0.95798	1.27995	0.200563	0.523657	no
Glyma01g03621	Glyma01g03621	Glyma01g03621	Gm01:3124253-3126137	14-13-0	14-13-14	OK	0.825666	0.186988	-2.14262	1.68574	0.0918468	0.332484	no
Glyma01g03630	Glyma01g03630	Glyma01g03630	Gm01:3127061-3127831	14-13-0	14-13-14	NOTEST	0	0	0	0	1	1	no
Glyma01g03650	Glyma01g03650	Glyma01g03650	Gm01:3132200-3135385	14-13-0	14-13-14	OK	10.6694	8.38297	-0.347949	0.472534	0.636546	0.886014	no
Glyma01g03661	Glyma01g03661	Glyma01g03661	Gm01:3135687-3141621	14-13-0	14-13-14	NOTEST	0	0	0	0	1	1	no
Glyma01g03670	Glyma01g03670	Glyma01g03670	Gm01:3144701-3145778	14-13-0	14-13-14	OK	0.54231	7.14925	3.7206	-3.66043	0.00025179	0.00575331	yes
Glyma01g03690	Glyma01g03690	Glyma01g03690	Gm01:3152038-3157769	14-13-0	14-13-14	NOTEST	0	0.0118867	1.79769e+308	1.79769e+308	0.200203	1	no
Glyma01g03700	Glyma01g03700	Glyma01g03700	Gm01:3162858-3164334	14-13-0	14-13-14	OK	2.28673	1.10842	-1.04479	1.06594	0.286449	0.63147	no
Glyma01g03710	Glyma01g03710	Glyma01g03710	Gm01:3167711-3172458	14-13-0	14-13-14	OK	6.08216	1.06218	-2.51755	2.68319	0.00729239	0.0695648	no
Glyma01g03720	Glyma01g03720	Glyma01g03720	Gm01:3174000-3185126	14-13-0	14-13-14	OK	168.429	21.3707	-2.97843	2.53201	0.0113411	0.0947303	no
Glyma01g03730	Glyma01g03730	Glyma01g03730	Gm01:3187344-3190927	14-13-0	14-13-14	OK	21.7869	14.9946	-0.539022	0.74722	0.454931	0.78126	no
Glyma01g03750	Glyma01g03750	Glyma01g03750	Gm01:3193903-3200492	14-13-0	14-13-14	OK	30.1137	15.8176	-0.928893	1.26333	0.206469	0.531493	no
Glyma01g03760	Glyma01g03760	Glyma01g03760	Gm01:3219159-3222449	14-13-0	14-13-14	OK	7.14616	19.452	1.44468	-1.85009	0.0643006	0.268578	no
Glyma01g03780	Glyma01g03780	Glyma01g03780	Gm01:3233213-3235819	14-13-0	14-13-14	OK	4.78163	4.13905	-0.208203	0.166633	0.867658	0.971282	no
Glyma01g03790	Glyma01g03790	Glyma01g03790	Gm01:3242605-3245458	14-13-0	14-13-14	OK	0.0506846	1.32452	4.70778	-3.91321	9.10763e-05	0.00259915	yes
Glyma01g03810	Glyma01g03810	Glyma01g03810	Gm01:3249405-3255967	14-13-0	14-13-14	OK	15.3691	18.3374	0.254752	-0.257354	0.796906	0.949881	no
Glyma01g03820	Glyma01g03820	Glyma01g03820	Gm01:3263267-3267637	14-13-0	14-13-14	OK	3.61855	1.32704	-1.4472	1.67313	0.0943009	0.337919	no
Glyma01g03830	Glyma01g03830	Glyma01g03830	Gm01:3283632-3286899	14-13-0	14-13-14	OK	14.3464	11.3595	-0.33679	0.46768	0.640014	0.888007	no
Glyma01g03850	Glyma01g03850	Glyma01g03850	Gm01:3312867-3318968	14-13-0	14-13-14	OK	1.96063	1.26502	-0.632154	0.636308	0.524576	0.823684	no
Glyma01g03870	Glyma01g03870	Glyma01g03870	Gm01:3327064-3332585	14-13-0	14-13-14	OK	3.40728	2.8521	-0.256595	0.346557	0.728924	0.924683	no
Glyma01g03880	Glyma01g03880	Glyma01g03880	Gm01:3348917-3352335	14-13-0	14-13-14	OK	1.79978	5.78697	1.68499	-2.10189	0.0355626	0.190731	no
Glyma01g03890	Glyma01g03890	Glyma01g03890	Gm01:3359534-3372620	14-13-0	14-13-14	OK	5.55458	4.3582	-0.349947	0.486083	0.626908	0.881736	no
Glyma01g03900	Glyma01g03900	Glyma01g03900	Gm01:3378305-3380122	14-13-0	14-13-14	OK	0	1.41843	1.79769e+308	1.79769e+308	0.0193897	0.134285	no
Glyma01g03910	Glyma01g03910	Glyma01g03910	Gm01:3381988-3384388	14-13-0	14-13-14	OK	0.0530058	1.43493	4.75869	-3.32837	0.000873545	0.0147231	yes
Glyma01g03921	Glyma01g03921	Glyma01g03921	Gm01:3390102-3396781	14-13-0	14-13-14	NOTEST	0.0611078	0.420478	2.7826	-2.15034	0.0315281	1	no
Glyma01g03930	Glyma01g03930	Glyma01g03930	Gm01:3400476-3411080	14-13-0	14-13-14	OK	34.4494	15.4874	-1.15338	1.34401	0.178946	0.4929	no
Glyma01g03940	Glyma01g03940	Glyma01g03940	Gm01:3413504-3415979	14-13-0	14-13-14	OK	0.38331	1.31286	1.77613	-1.63663	0.101708	0.353742	no
Glyma01g03948	Glyma01g03948	Glyma01g03948	Gm01:3423773-3425166	14-13-0	14-13-14	OK	0.588476	0.599954	0.0278687	-0.0222006	0.982288	0.996956	no
Glyma01g03956	Glyma01g03956	Glyma01g03956	Gm01:3431068-3433014	14-13-0	14-13-14	OK	5.80513	7.5754	0.383994	-0.473662	0.635741	0.885584	no
Glyma01g03964	Glyma01g03964	Glyma01g03964	Gm01:3433091-3436594	14-13-0	14-13-14	OK	1.17203	0.872994	-0.424963	0.445234	0.656151	0.894901	no
Glyma01g03972	Glyma01g03972	Glyma01g03972	Gm01:3439667-3441084	14-13-0	14-13-14	NOTEST	0	0	0	0	1	1	no
Glyma01g03980	Glyma01g03980	Glyma01g03980	Gm01:3455191-3461955	14-13-0	14-13-14	OK	0.580678	0.609308	0.0694339	-0.073828	0.941147	0.989754	no
Glyma01g04000	Glyma01g04000	Glyma01g04000	Gm01:3487914-3494204	14-13-0	14-13-14	OK	3.12277	1.56747	-0.994389	1.33082	0.183248	0.499357	no
Glyma01g04015	Glyma01g04015	Glyma01g04015	Gm01:3502393-3507947	14-13-0	14-13-14	NOTEST	0.255311	0.0624405	-2.0317	1.33435	0.182091	1	no
Glyma01g04030	Glyma01g04030	Glyma01g04030	Gm01:3513144-3513438	14-13-0	14-13-14	NOTEST	0	0	0	0	1	1	no
Glyma01g04040	Glyma01g04040	Glyma01g04040	Gm01:3514698-3521382	14-13-0	14-13-14	OK	1.66054	6.7934	2.03248	-2.19794	0.0279533	0.167523	no
Glyma01g04050	Glyma01g04050	Glyma01g04050	Gm01:3524004-3527778	14-13-0	14-13-14	OK	79.0967	20.79	-1.92773	2.281	0.0225486	0.147219	no
Glyma01g04060	Glyma01g04060	Glyma01g04060	Gm01:3533389-3537718	14-13-0	14-13-14	OK	6.58374	10.0497	0.610172	-0.828627	0.407315	0.744162	no
Glyma01g04070	Glyma01g04070	Glyma01g04070	Gm01:3541049-3543307	14-13-0	14-13-14	OK	14.8607	51.157	1.78343	-2.37278	0.0176546	0.12629	no
Glyma01g04080	Glyma01g04080	Glyma01g04080	Gm01:3552334-3560811	14-13-0	14-13-14	OK	0.975975	0.989965	0.0205336	-0.0123116	0.990177	0.998255	no
Glyma01g04090	Glyma01g04090	Glyma01g04090	Gm01:3552334-3560811	14-13-0	14-13-14	OK	1.6693	3.09437	0.890401	-0.822496	0.410794	0.746766	no
Glyma01g04100	Glyma01g04100	Glyma01g04100	Gm01:3565109-3567816	14-13-0	14-13-14	OK	3.76771	3.75895	-0.00335781	0.00439967	0.99649	0.999595	no
Glyma01g04107	Glyma01g04107	Glyma01g04107	Gm01:3570498-3572031	14-13-0	14-13-14	OK	1.62885	0.929478	-0.809357	0.742595	0.457727	0.783262	no
Glyma01g04114	Glyma01g04114	Glyma01g04114	Gm01:3573892-3576381	14-13-0	14-13-14	NOTEST	0	0	0	0	1	1	no
Glyma01g04122	Glyma01g04122	Glyma01g04122	Gm01:3576871-3579242	14-13-0	14-13-14	OK	0	0.74289	1.79769e+308	1.79769e+308	0.0296955	0.173267	no
Glyma01g04130	Glyma01g04130	Glyma01g04130	Gm01:3588235-3590927	14-13-0	14-13-14	OK	22.3354	17.4916	-0.35267	0.462484	0.643734	0.889257	no
Glyma01g04140	Glyma01g04140	Glyma01g04140	Gm01:3593852-3595627	14-13-0	14-13-14	OK	7.02108	3.5045	-1.00248	1.20732	0.22731	0.55861	no
Glyma01g04151	Glyma01g04151	Glyma01g04151	Gm01:3601850-3604249	14-13-0	14-13-14	OK	3.13272	4.2514	0.440519	-0.549672	0.582544	0.859015	no
Glyma01g04160	Glyma01g04160	Glyma01g04160	Gm01:3614505-3619208	14-13-0	14-13-14	OK	0.118442	0.578121	2.28719	-1.54961	0.121234	0.392858	no
Glyma01g04170	Glyma01g04170	Glyma01g04170	Gm01:3622380-3627999	14-13-0	14-13-14	OK	26.3052	16.0906	-0.709128	0.835372	0.403508	0.740961	no
Glyma01g04190	Glyma01g04190	Glyma01g04190	Gm01:3657972-3659933	14-13-0	14-13-14	OK	2.70061	7.22436	1.41958	-1.69208	0.0906311	0.329943	no
Glyma01g04200	Glyma01g04200	Glyma01g04200	Gm01:3671722-3676091	14-13-0	14-13-14	NOTEST	0.063528	0.122594	0.948424	-0.73413	0.46287	1	no
Glyma01g04210	Glyma01g04210	Glyma01g04210	Gm01:3695969-3699966	14-13-0	14-13-14	LOWDATA	0	0	-1.79769e+308	0	1	1	no
Glyma01g04220	Glyma01g04220	Glyma01g04220	Gm01:3695969-3699966	14-13-0	14-13-14	OK	0.765506	1.8364	1.26239	-1.29309	0.19598	0.519128	no
Glyma01g04230	Glyma01g04230	Glyma01g04230	Gm01:3717479-3721262	14-13-0	14-13-14	OK	30.6362	8.64192	-1.82581	2.38184	0.0172266	0.124203	no
Glyma01g04241	Glyma01g04241	Glyma01g04241	Gm01:3734519-3735893	14-13-0	14-13-14	OK	0.643084	0.691388	0.104487	-0.0922527	0.926497	0.986189	no
Glyma01g04250	Glyma01g04250	Glyma01g04250	Gm01:3750043-3752379	14-13-0	14-13-14	OK	1.8372	1.74084	-0.0777255	0.0866603	0.930942	0.98724	no
Glyma01g04261	Glyma01g04261	Glyma01g04261	Gm01:3767622-3769840	14-13-0	14-13-14	NOTEST	0	0.0243782	1.79769e+308	1.79769e+308	0.200203	1	no
Glyma01g04270	Glyma01g04270	Glyma01g04270	Gm01:3770398-3790851	14-13-0	14-13-14	OK	19.0531	4.79926	-1.98914	2.18417	0.0289495	0.170748	no
Glyma01g04285	Glyma01g04285	Glyma01g04285	Gm01:3792928-3793735	14-13-0	14-13-14	OK	1.94788	1.66754	-0.224185	0.19937	0.841973	0.96414	no
Glyma01g04300	Glyma01g04300	Glyma01g04300	Gm01:3800482-3805133	14-13-0	14-13-14	OK	2.98433	7.937	1.41119	-1.59011	0.11181	0.37534	no
Glyma01g04310	Glyma01g04310	Glyma01g04310	Gm01:3839061-3840278	14-13-0	14-13-14	NOTEST	0	0	0	0	1	1	no
Glyma01g04320	Glyma01g04320	Glyma01g04320	Gm01:3843990-3851452	14-13-0	14-13-14	OK	12.4594	9.73842	-0.35548	0.459849	0.645625	0.890179	no
Glyma01g04330	Glyma01g04330	Glyma01g04330	Gm01:3875178-3876239	14-13-0	14-13-14	OK	0.312144	0.517162	0.728404	-0.467067	0.640452	0.888252	no
Glyma01g04335	Glyma01g04335	Glyma01g04335	Gm01:3875178-3876239	14-13-0	14-13-14	OK	3.05472	1.73536	-0.815801	0.23834	0.811618	0.954371	no
Glyma01g04340	Glyma01g04340	Glyma01g04340	Gm01:3894968-3896837	14-13-0	14-13-14	OK	1.83468	0.218376	-3.07065	2.78727	0.00531542	0.0558718	no
Glyma01g04350	Glyma01g04350	Glyma01g04350	Gm01:3901049-3902869	14-13-0	14-13-14	OK	81.6187	1.21673	-6.06781	6.11588	9.60233e-10	2.99928e-07	yes
Glyma01g04361	Glyma01g04361	Glyma01g04361	Gm01:3905975-3906745	14-13-0	14-13-14	NOTEST	0	0	0	0	1	1	no
Glyma01g04370	Glyma01g04370	Glyma01g04370	Gm01:3910797-3912019	14-13-0	14-13-14	OK	2.80849	0	-1.79769e+308	-1.79769e+308	0.0128318	0.102745	no
Glyma01g04380	Glyma01g04380	Glyma01g04380	Gm01:3925166-3926952	14-13-0	14-13-14	OK	1.19887	1.31702	0.135609	-0.134744	0.892814	0.977274	no
Glyma01g04400	Glyma01g04400	Glyma01g04400	Gm01:3936729-3941417	14-13-0	14-13-14	OK	17.4085	11.0806	-0.651762	0.875479	0.381313	0.722598	no
Glyma01g04410	Glyma01g04410	Glyma01g04410	Gm01:3950636-3955032	14-13-0	14-13-14	OK	3.15768	1.6625	-0.925512	0.992161	0.321119	0.667927	no
Glyma01g04421	Glyma01g04421	Glyma01g04421	Gm01:3965515-3967099	14-13-0	14-13-14	OK	0.500808	0.924192	0.883937	-0.760692	0.446841	0.776141	no
Glyma01g04430	Glyma01g04430	Glyma01g04430	Gm01:3981173-3984324	14-13-0	14-13-14	NOTEST	0.0675944	0.29542	2.12779	-1.71251	0.086803	1	no
Glyma01g04440	Glyma01g04440	Glyma01g04440	Gm01:3984541-3989981	14-13-0	14-13-14	OK	3.88799	9.57017	1.29952	-1.66827	0.0952618	0.340109	no
Glyma01g04450	Glyma01g04450	Glyma01g04450	Gm01:3990476-3991986	14-13-0	14-13-14	OK	1.67721	0.0307593	-5.7689	3.10113	0.00192783	0.027257	yes
Glyma01g04460	Glyma01g04460	Glyma01g04460	Gm01:3993484-3995564	14-13-0	14-13-14	OK	9.68149	10.6868	0.142526	-0.196452	0.844257	0.9651	no
Glyma01g04468	Glyma01g04468	Glyma01g04468	Gm01:4005281-4011408	14-13-0	14-13-14	OK	1.63766	0.508156	-1.68829	1.22169	0.221826	0.551447	no
Glyma01g04476	Glyma01g04476	Glyma01g04476	Gm01:4012612-4020206	14-13-0	14-13-14	OK	12.6161	6.26145	-1.01069	1.31448	0.188685	0.507541	no
Glyma01g04484	Glyma01g04484	Glyma01g04484	Gm01:4023641-4024312	14-13-0	14-13-14	OK	4.739	6.70899	0.501512	-0.472531	0.636548	0.886014	no
Glyma01g04492	Glyma01g04492	Glyma01g04492	Gm01:4024327-4035566	14-13-0	14-13-14	OK	6.25159	4.48836	-0.478035	0.655715	0.512007	0.815943	no
Glyma01g04500	Glyma01g04500	Glyma01g04500	Gm01:4070066-4074636	14-13-0	14-13-14	OK	0.115283	0.906189	2.97463	-2.65754	0.00787139	0.0732412	no
Glyma01g04515	Glyma01g04515	Glyma01g04515	Gm01:4094045-4096371	14-13-0	14-13-14	OK	3.50817	2.14525	-0.709571	0.909535	0.363068	0.707272	no
Glyma01g04530	Glyma01g04530	Glyma01g04530	Gm01:4108620-4111438	14-13-0	14-13-14	OK	63.7809	13.069	-2.28698	2.62849	0.00857661	0.0779288	no
Glyma01g04545	Glyma01g04545	Glyma01g04545	Gm01:4119639-4119995	14-13-0	14-13-14	NOTEST	0	0	0	0	1	1	no
Glyma01g04560	Glyma01g04560	Glyma01g04560	Gm01:4134768-4138744	14-13-0	14-13-14	OK	3.03832	2.89341	-0.0705036	0.0694586	0.944625	0.990487	no
Glyma01g04570	Glyma01g04570	Glyma01g04570	Gm01:4140494-4144862	14-13-0	14-13-14	OK	10.227	9.52264	-0.102956	0.136637	0.891318	0.976849	no
Glyma01g04580	Glyma01g04580	Glyma01g04580	Gm01:4160568-4163236	14-13-0	14-13-14	OK	1.22904	1.55576	0.340083	-0.334714	0.737841	0.928877	no
Glyma01g04590	Glyma01g04590	Glyma01g04590	Gm01:4190455-4199176	14-13-0	14-13-14	OK	0.903313	1.16324	0.364846	-0.437801	0.661531	0.896751	no
Glyma01g04600	Glyma01g04600	Glyma01g04600	Gm01:4213202-4215294	14-13-0	14-13-14	OK	11.9472	7.99333	-0.579802	0.757522	0.448737	0.777095	no
Glyma01g04610	Glyma01g04610	Glyma01g04610	Gm01:4217440-4221353	14-13-0	14-13-14	OK	2.00718	2.95677	0.558856	-0.60952	0.54218	0.835819	no
Glyma01g04616	Glyma01g04616	Glyma01g04616	Gm01:4234777-4236309	14-13-0	14-13-14	NOTEST	0	0	0	0	1	1	no
Glyma01g04623	Glyma01g04623	Glyma01g04623	Gm01:4248628-4253094	14-13-0	14-13-14	NOTEST	0	0.0278251	1.79769e+308	1.79769e+308	0.297449	1	no
Glyma01g04630	Glyma01g04630	Glyma01g04630	Gm01:4267486-4273671	14-13-0	14-13-14	OK	1.60401	1.17573	-0.448136	0.503372	0.614703	0.875163	no
Glyma01g04640	Glyma01g04640	Glyma01g04640	Gm01:4278592-4280521	14-13-0	14-13-14	OK	0.117129	0.715831	2.61152	-2.13489	0.0327704	0.182268	no
Glyma01g04650	Glyma01g04650	Glyma01g04650	Gm01:4282743-4288290	14-13-0	14-13-14	NOTEST	0	0	0	0	1	1	no
Glyma01g04660	Glyma01g04660	Glyma01g04660	Gm01:4294494-4299400	14-13-0	14-13-14	OK	1.43669	1.41159	-0.0254318	0.0266099	0.978771	0.996598	no
Glyma01g04670	Glyma01g04670	Glyma01g04670	Gm01:4302121-4303918	14-13-0	14-13-14	OK	0.670574	2.529	1.9151	-1.84083	0.0656465	0.271918	no
Glyma01g04690	Glyma01g04690	Glyma01g04690	Gm01:4314360-4316230	14-13-0	14-13-14	OK	7.22393	6.68444	-0.111977	0.146124	0.883824	0.975218	no
Glyma01g04700	Glyma01g04700	Glyma01g04700	Gm01:4319542-4321677	14-13-0	14-13-14	NOTEST	0	0	0	0	1	1	no
Glyma01g04710	Glyma01g04710	Glyma01g04710	Gm01:4323773-4325439	14-13-0	14-13-14	OK	471.017	43.1236	-3.44923	3.16913	0.00152897	0.0228155	yes
Glyma01g04720	Glyma01g04720	Glyma01g04720	Gm01:4331150-4337114	14-13-0	14-13-14	OK	3.99958	12.6467	1.66084	-2.2171	0.0266164	0.162624	no
Glyma01g04730	Glyma01g04730	Glyma01g04730	Gm01:4347876-4356892	14-13-0	14-13-14	OK	2.46063	1.17746	-1.06335	1.22587	0.220249	0.54954	no
Glyma01g04740	Glyma01g04740	Glyma01g04740	Gm01:4358996-4361499	14-13-0	14-13-14	OK	4.40783	4.29824	-0.0363246	0.0459803	0.963326	0.993571	no
Glyma01g04750	Glyma01g04750	Glyma01g04750	Gm01:4367348-4370072	14-13-0	14-13-14	OK	0.303798	0.57919	0.930924	-0.789103	0.430052	0.761576	no
Glyma01g04760	Glyma01g04760	Glyma01g04760	Gm01:4370091-4371490	14-13-0	14-13-14	OK	46.3142	3.22	-3.84632	4.40995	1.03394e-05	0.000477404	yes
Glyma01g04770	Glyma01g04770	Glyma01g04770	Gm01:4372756-4380517	14-13-0	14-13-14	NOTEST	0	0	0	0	1	1	no
Glyma01g04780	Glyma01g04780	Glyma01g04780	Gm01:4372756-4380517	14-13-0	14-13-14	OK	0.462078	0	-1.79769e+308	-1.79769e+308	0.320771	0.6675	no
Glyma01g04791	Glyma01g04791	Glyma01g04791	Gm01:4372756-4380517	14-13-0	14-13-14	NOTEST	0.31966	0.192039	-0.735134	0.651301	0.514853	1	no
Glyma01g04800	Glyma01g04800	Glyma01g04800	Gm01:4381634-4382677	14-13-0	14-13-14	NOTEST	0	0	0	0	1	1	no
Glyma01g04810	Glyma01g04810	Glyma01g04810	Gm01:4398540-4400009	14-13-0	14-13-14	NOTEST	0	0	0	0	1	1	no
Glyma01g04820	Glyma01g04820	Glyma01g04820	Gm01:4406613-4412858	14-13-0	14-13-14	OK	17.3369	9.01967	-0.942699	1.23179	0.218027	0.546408	no
Glyma01g04830	Glyma01g04830	Glyma01g04830	Gm01:4435158-4439690	14-13-0	14-13-14	OK	31.307	1.48594	-4.39703	4.97401	6.55832e-07	5.20477e-05	yes
Glyma01g04860	Glyma01g04860	Glyma01g04860	Gm01:4462980-4471168	14-13-0	14-13-14	OK	6.00327	2.91309	-1.0432	1.07161	0.283896	0.62802	no
Glyma01g04870	Glyma01g04870	Glyma01g04870	Gm01:4462980-4471168	14-13-0	14-13-14	NOTEST	0.043193	0.146801	1.76499	-0.168972	0.865819	1	no
Glyma01g04880	Glyma01g04880	Glyma01g04880	Gm01:4472509-4474524	14-13-0	14-13-14	OK	9.18109	13.6185	0.568825	-0.778259	0.436416	0.766953	no
Glyma01g04890	Glyma01g04890	Glyma01g04890	Gm01:4508033-4510800	14-13-0	14-13-14	OK	8.5204	16.5368	0.956683	-1.16411	0.244378	0.58016	no
Glyma01g04895	Glyma01g04895	Glyma01g04895	Gm01:4537147-4539699	14-13-0	14-13-14	NOTEST	0	0	0	0	1	1	no
Glyma01g04900	Glyma01g04900	Glyma01g04900	Gm01:4581543-4588129	14-13-0	14-13-14	OK	7.88898	0.534775	-3.88284	4.07947	4.51384e-05	0.00150076	yes
Glyma01g04920	Glyma01g04920	Glyma01g04920	Gm01:4591469-4596424	14-13-0	14-13-14	OK	42.5404	5.4251	-2.97111	3.18967	0.00142434	0.0215524	yes
Glyma01g04930	Glyma01g04930	Glyma01g04930	Gm01:4617117-4621351	14-13-0	14-13-14	OK	8.09079	7.10784	-0.18687	0.235133	0.814105	0.95504	no
Glyma01g04940	Glyma01g04940	Glyma01g04940	Gm01:4623827-4626604	14-13-0	14-13-14	NOTEST	0	0	0	0	1	1	no
Glyma01g04950	Glyma01g04950	Glyma01g04950	Gm01:4628266-4630966	14-13-0	14-13-14	NOTEST	0	0.0342374	1.79769e+308	1.79769e+308	0.200203	1	no
Glyma01g04970	Glyma01g04970	Glyma01g04970	Gm01:4642856-4646062	14-13-0	14-13-14	NOTEST	0	0	0	0	1	1	no
Glyma01g04980	Glyma01g04980	Glyma01g04980	Gm01:4649145-4655506	14-13-0	14-13-14	OK	28.6264	11.475	-1.31885	1.62353	0.104476	0.359536	no
Glyma01g04991	Glyma01g04991	Glyma01g04991	Gm01:4658655-4660266	14-13-0	14-13-14	OK	2.36612	0.604523	-1.96865	1.96464	0.0494555	0.230185	no
Glyma01g05000	Glyma01g05000	Glyma01g05000	Gm01:4661267-4665903	14-13-0	14-13-14	OK	31.7915	8.14418	-1.9648	2.61578	0.00890249	0.0798319	no
Glyma01g05020	Glyma01g05020	Glyma01g05020	Gm01:4671907-4672948	14-13-0	14-13-14	NOTEST	0	0	0	0	1	1	no
Glyma01g05035	Glyma01g05035	Glyma01g05035	Gm01:4674370-4675308	14-13-0	14-13-14	NOTEST	0	0	0	0	1	1	no
Glyma01g05050	Glyma01g05050	Glyma01g05050	Gm01:4685833-4692108	14-13-0	14-13-14	NOTEST	0	0	0	0	1	1	no
Glyma01g05060	Glyma01g05060	Glyma01g05060	Gm01:4706315-4710196	14-13-0	14-13-14	NOTEST	0	0	0	0	1	1	no
Glyma01g05070	Glyma01g05070	Glyma01g05070	Gm01:4710246-4716428	14-13-0	14-13-14	NOTEST	0	0	0	0	1	1	no
Glyma01g05080	Glyma01g05080	Glyma01g05080	Gm01:4729092-4732808	14-13-0	14-13-14	OK	11.808	0.374873	-4.97722	4.75114	2.02274e-06	0.000130182	yes
Glyma01g05090	Glyma01g05090	Glyma01g05090	Gm01:4733168-4736974	14-13-0	14-13-14	OK	0.0898685	0.530465	2.56137	-1.91882	0.0550069	0.244518	no
Glyma01g05100	Glyma01g05100	Glyma01g05100	Gm01:4750064-4755456	14-13-0	14-13-14	OK	2.12598	3.9457	0.892152	-1.14054	0.254062	0.59204	no
Glyma01g05110	Glyma01g05110	Glyma01g05110	Gm01:4767629-4768506	14-13-0	14-13-14	NOTEST	0	0	0	0	1	1	no
Glyma01g05120	Glyma01g05120	Glyma01g05120	Gm01:4767629-4768506	14-13-0	14-13-14	NOTEST	0	0	0	0	1	1	no
Glyma01g05135	Glyma01g05135	Glyma01g05135	Gm01:4772497-4774260	14-13-0	14-13-14	NOTEST	0	0	0	0	1	1	no
Glyma01g05150	Glyma01g05150	Glyma01g05150	Gm01:4805906-4807682	14-13-0	14-13-14	OK	161.003	50.0101	-1.6868	1.77889	0.0752572	0.295219	no
Glyma01g05160	Glyma01g05160	Glyma01g05160	Gm01:4822853-4826845	14-13-0	14-13-14	OK	10.99	6.25571	-0.812948	1.12211	0.261815	0.602443	no
Glyma01g05170	Glyma01g05170	Glyma01g05170	Gm01:4850795-4854700	14-13-0	14-13-14	OK	4.99147	6.21801	0.316989	-0.413179	0.679476	0.90453	no
Glyma01g05180	Glyma01g05180	Glyma01g05180	Gm01:4855329-4863296	14-13-0	14-13-14	NOTEST	0.0570583	0.291773	2.35434	-0.604952	0.545211	1	no
Glyma01g05190	Glyma01g05190	Glyma01g05190	Gm01:4855329-4863296	14-13-0	14-13-14	OK	0.0954454	1.6163	4.08188	-3.24716	0.00116564	0.0183814	yes
Glyma01g05220	Glyma01g05220	Glyma01g05220	Gm01:4891977-4893336	14-13-0	14-13-14	OK	86.4766	5.50643	-3.97312	4.60292	4.16611e-06	0.000232905	yes
Glyma01g05230	Glyma01g05230	Glyma01g05230	Gm01:4900381-4902743	14-13-0	14-13-14	OK	2.10619	9.77186	2.214	-2.72095	0.00650954	0.0643507	no
Glyma01g05240	Glyma01g05240	Glyma01g05240	Gm01:4928138-4929616	14-13-0	14-13-14	NOTEST	0.155748	0.0783686	-0.990867	0.468287	0.639579	1	no
Glyma01g05310	Glyma01g05310	Glyma01g05310	Gm01:4961751-4963489	14-13-0	14-13-14	NOTEST	0.248964	0.0420921	-2.56432	1.30401	0.192229	1	no
Glyma01g05321	Glyma01g05321	Glyma01g05321	Gm01:5005094-5010084	14-13-0	14-13-14	OK	0.927135	1.32542	0.5156	-0.419657	0.674736	0.902671	no
Glyma01g05330	Glyma01g05330	Glyma01g05330	Gm01:5020413-5021405	14-13-0	14-13-14	NOTEST	0	0	0	0	1	1	no
Glyma01g05340	Glyma01g05340	Glyma01g05340	Gm01:5037886-5042760	14-13-0	14-13-14	OK	4.56329	3.48219	-0.390077	0.499552	0.617391	0.876477	no
Glyma01g05350	Glyma01g05350	Glyma01g05350	Gm01:5083980-5085647	14-13-0	14-13-14	OK	4.88689	3.53315	-0.46796	0.565613	0.571657	0.852876	no
Glyma01g05360	Glyma01g05360	Glyma01g05360	Gm01:5110798-5114049	14-13-0	14-13-14	OK	2.79537	1.80644	-0.629891	0.640824	0.521637	0.82213	no
Glyma01g05370	Glyma01g05370	Glyma01g05370	Gm01:5118887-5122289	14-13-0	14-13-14	OK	0.495718	3.51557	2.82617	-2.50338	0.0123015	0.0998355	no
Glyma01g05390	Glyma01g05390	Glyma01g05390	Gm01:5164083-5165652	14-13-0	14-13-14	NOTEST	0	0	0	0	1	1	no
Glyma01g05410	Glyma01g05410	Glyma01g05410	Gm01:5213600-5216013	14-13-0	14-13-14	OK	11.4357	11.2957	-0.0177667	0.023939	0.980901	0.996736	no
Glyma01g05430	Glyma01g05430	Glyma01g05430	Gm01:5252557-5258022	14-13-0	14-13-14	OK	6.26518	3.40231	-0.880842	1.09827	0.272088	0.614943	no
Glyma01g05435	Glyma01g05435	Glyma01g05435	Gm01:5252557-5258022	14-13-0	14-13-14	NOTEST	0	0	0	0	1	1	no
Glyma01g05440	Glyma01g05440	Glyma01g05440	Gm01:5263624-5268235	14-13-0	14-13-14	OK	2.49024	4.51215	0.857532	-1.07587	0.281984	0.626618	no
Glyma01g05450	Glyma01g05450	Glyma01g05450	Gm01:5286387-5287671	14-13-0	14-13-14	OK	0.694716	0	-1.79769e+308	-1.79769e+308	0.040303	0.204563	no
Glyma01g05470	Glyma01g05470	Glyma01g05470	Gm01:5303846-5307805	14-13-0	14-13-14	OK	2.91736	4.29664	0.558543	-0.644513	0.519243	0.820484	no
Glyma01g05490	Glyma01g05490	Glyma01g05490	Gm01:5313627-5317389	14-13-0	14-13-14	OK	9.51115	5.15298	-0.884212	0.97157	0.331265	0.678349	no
Glyma01g05500	Glyma01g05500	Glyma01g05500	Gm01:5324074-5325556	14-13-0	14-13-14	OK	1.69172	0.0260013	-6.02376	3.25641	0.00112831	0.0179759	yes
Glyma01g05521	Glyma01g05521	Glyma01g05521	Gm01:5332060-5334718	14-13-0	14-13-14	NOTEST	0	0	0	0	1	1	no
Glyma01g05540	Glyma01g05540	Glyma01g05540	Gm01:5339676-5347885	14-13-0	14-13-14	OK	0.735963	1.16201	0.658924	-0.546863	0.584473	0.860279	no
Glyma01g05550	Glyma01g05550	Glyma01g05550	Gm01:5348570-5352305	14-13-0	14-13-14	OK	12.1579	8.38497	-0.536015	0.743284	0.45731	0.78302	no
Glyma01g05565	Glyma01g05565	Glyma01g05565	Gm01:5365957-5368432	14-13-0	14-13-14	OK	0.612943	1.28723	1.07045	-0.926411	0.354232	0.699709	no
Glyma01g05580	Glyma01g05580	Glyma01g05580	Gm01:5372439-5377697	14-13-0	14-13-14	OK	3.3226	2.11203	-0.653685	0.823475	0.410238	0.746417	no
Glyma01g05680	Glyma01g05680	Glyma01g05680	Gm01:5434961-5437325	14-13-0	14-13-14	NOTEST	0	0	0	0	1	1	no
Glyma01g05710	Glyma01g05710	Glyma01g05710	Gm01:5452126-5455897	14-13-0	14-13-14	OK	3.29354	2.40911	-0.451139	0.594163	0.552403	0.841584	no
Glyma01g05740	Glyma01g05740	Glyma01g05740	Gm01:5471207-5473302	14-13-0	14-13-14	OK	96.732	39.0225	-1.30969	1.5548	0.119994	0.390417	no
Glyma01g05750	Glyma01g05750	Glyma01g05750	Gm01:5490127-5498444	14-13-0	14-13-14	OK	9.66371	5.74426	-0.750456	1.01365	0.310751	0.657388	no
Glyma01g05760	Glyma01g05760	Glyma01g05760	Gm01:5490127-5498444	14-13-0	14-13-14	OK	1.4669	1.4318	-0.0349389	0.00848584	0.993229	0.998941	no
Glyma01g05765	Glyma01g05765	Glyma01g05765	Gm01:5500755-5503968	14-13-0	14-13-14	OK	1.28624	1.02967	-0.320969	0.287059	0.774067	0.94249	no
Glyma01g05770	Glyma01g05770	Glyma01g05770	Gm01:5507145-5510888	14-13-0	14-13-14	OK	1.3535	0.74593	-0.859579	0.762336	0.44586	0.775416	no
Glyma01g05775	Glyma01g05775	Glyma01g05775	Gm01:5515370-5518889	14-13-0	14-13-14	NOTEST	0	0	0	0	1	1	no
Glyma01g05780	Glyma01g05780	Glyma01g05780	Gm01:5532190-5532902	14-13-0	14-13-14	NOTEST	0	0.20003	1.79769e+308	1.79769e+308	0.117179	1	no
Glyma01g05800	Glyma01g05800	Glyma01g05800	Gm01:5536188-5540803	14-13-0	14-13-14	OK	15.512	17.5376	0.177066	-0.243461	0.807649	0.952514	no
Glyma01g05805	Glyma01g05805	Glyma01g05805	Gm01:5546122-5546986	14-13-0	14-13-14	OK	0	1.46117	1.79769e+308	1.79769e+308	0.0306878	0.176367	no
Glyma01g05810	Glyma01g05810	Glyma01g05810	Gm01:5571757-5573352	14-13-0	14-13-14	OK	12.3637	3.08403	-2.00322	2.52314	0.0116312	0.0960892	no
Glyma01g05820	Glyma01g05820	Glyma01g05820	Gm01:5576197-5588666	14-13-0	14-13-14	OK	6.47098	1.06724	-2.60009	1.92324	0.0544498	0.242898	no
Glyma01g05830	Glyma01g05830	Glyma01g05830	Gm01:5591933-5594156	14-13-0	14-13-14	OK	1.58766	1.45886	-0.122058	0.133562	0.893749	0.977394	no
Glyma01g05840	Glyma01g05840	Glyma01g05840	Gm01:5603554-5605881	14-13-0	14-13-14	NOTEST	0	0	0	0	1	1	no
Glyma01g05850	Glyma01g05850	Glyma01g05850	Gm01:5614232-5617834	14-13-0	14-13-14	NOTEST	0	0.203148	1.79769e+308	1.79769e+308	0.0654322	1	no
Glyma01g05860	Glyma01g05860	Glyma01g05860	Gm01:5646198-5652308	14-13-0	14-13-14	OK	2.04265	3.18677	0.64165	-0.733443	0.463288	0.786624	no
Glyma01g05871	Glyma01g05871	Glyma01g05871	Gm01:5655285-5657085	14-13-0	14-13-14	OK	0.704973	0.823081	0.223467	-0.191061	0.848477	0.965956	no
Glyma01g05880	Glyma01g05880	Glyma01g05880	Gm01:5667408-5668624	14-13-0	14-13-14	OK	4.37464	1.13836	-1.9422	2.0186	0.0435288	0.213789	no
Glyma01g05890	Glyma01g05890	Glyma01g05890	Gm01:5668699-5671152	14-13-0	14-13-14	OK	0.532205	0.816683	0.617794	-0.578304	0.563059	0.848679	no
Glyma01g05920	Glyma01g05920	Glyma01g05920	Gm01:5704147-5706648	14-13-0	14-13-14	OK	5.32225	5.20231	-0.0328832	0.0450318	0.964082	0.993617	no
Glyma01g05933	Glyma01g05933	Glyma01g05933	Gm01:5723315-5724248	14-13-0	14-13-14	NOTEST	0	0	0	0	1	1	no
Glyma01g05946	Glyma01g05946	Glyma01g05946	Gm01:5726524-5728292	14-13-0	14-13-14	NOTEST	0	0	0	0	1	1	no
Glyma01g05960	Glyma01g05960	Glyma01g05960	Gm01:5750258-5754433	14-13-0	14-13-14	OK	1.34329	0.353468	-1.92612	1.85756	0.063231	0.265708	no
Glyma01g05970	Glyma01g05970	Glyma01g05970	Gm01:5789076-5789854	14-13-0	14-13-14	NOTEST	0	0.136217	1.79769e+308	1.79769e+308	0.117179	1	no
Glyma01g05980	Glyma01g05980	Glyma01g05980	Gm01:5800710-5803197	14-13-0	14-13-14	OK	0.0360556	0.47725	3.72645	-2.53909	0.0111142	0.0932468	no
Glyma01g05991	Glyma01g05991	Glyma01g05991	Gm01:5815181-5815856	14-13-0	14-13-14	NOTEST	0	0	0	0	1	1	no
Glyma01g06001	Glyma01g06001	Glyma01g06001	Gm01:5820213-5821125	14-13-0	14-13-14	NOTEST	0	0	0	0	1	1	no
Glyma01g06010	Glyma01g06010	Glyma01g06010	Gm01:5849676-5850474	14-13-0	14-13-14	OK	4.44723	5.91523	0.411526	-0.4582	0.646809	0.890934	no
Glyma01g06030	Glyma01g06030	Glyma01g06030	Gm01:5873668-5876124	14-13-0	14-13-14	OK	91.3887	64.1418	-0.510752	0.471156	0.637529	0.88652	no
Glyma01g06060	Glyma01g06060	Glyma01g06060	Gm01:5950520-5957354	14-13-0	14-13-14	OK	3.23303	4.64129	0.52164	-0.596564	0.550798	0.84054	no
Glyma01g06080	Glyma01g06080	Glyma01g06080	Gm01:5980779-5983675	14-13-0	14-13-14	OK	9.33077	5.84599	-0.674547	0.872532	0.382918	0.723786	no
Glyma01g06091	Glyma01g06091	Glyma01g06091	Gm01:6001894-6002536	14-13-0	14-13-14	NOTEST	0	0	0	0	1	1	no
Glyma01g06101	Glyma01g06101	Glyma01g06101	Gm01:6012889-6016913	14-13-0	14-13-14	NOTEST	0	0	0	0	1	1	no
Glyma01g06110	Glyma01g06110	Glyma01g06110	Gm01:6012889-6016913	14-13-0	14-13-14	OK	279.695	45.7511	-2.61198	2.35009	0.0187689	0.131402	no
Glyma01g06121	Glyma01g06121	Glyma01g06121	Gm01:6021842-6025894	14-13-0	14-13-14	NOTEST	0	0	0	0	1	1	no
Glyma01g06131	Glyma01g06131	Glyma01g06131	Gm01:6027072-6027783	14-13-0	14-13-14	NOTEST	0	0	0	0	1	1	no
Glyma01g06140	Glyma01g06140	Glyma01g06140	Gm01:6036836-6042396	14-13-0	14-13-14	NOTEST	0	0	0	0	1	1	no
Glyma01g06150	Glyma01g06150	Glyma01g06150	Gm01:6047154-6049059	14-13-0	14-13-14	OK	1.19416	0.642985	-0.893138	0.817317	0.413747	0.749344	no
Glyma01g06170	Glyma01g06170	Glyma01g06170	Gm01:6071138-6081550	14-13-0	14-13-14	OK	14.0986	15.4555	0.132569	-0.147859	0.882454	0.974882	no
Glyma01g06181	Glyma01g06181	Glyma01g06181	Gm01:6100672-6102037	14-13-0	14-13-14	NOTEST	0	0	0	0	1	1	no
Glyma01g06192	Glyma01g06192	Glyma01g06192	Gm01:6238679-6240315	14-13-0	14-13-14	NOTEST	0	0.27251	1.79769e+308	1.79769e+308	0.0515363	1	no
Glyma01g06203	Glyma01g06203	Glyma01g06203	Gm01:6266528-6267750	14-13-0	14-13-14	NOTEST	0	0	0	0	1	1	no
Glyma01g06214	Glyma01g06214	Glyma01g06214	Gm01:6283658-6285214	14-13-0	14-13-14	NOTEST	0	0	0	0	1	1	no
Glyma01g06226	Glyma01g06226	Glyma01g06226	Gm01:6285502-6288118	14-13-0	14-13-14	NOTEST	0	0	0	0	1	1	no
Glyma01g06238	Glyma01g06238	Glyma01g06238	Gm01:6291503-6292208	14-13-0	14-13-14	NOTEST	0	0	0	0	1	1	no
Glyma01g06250	Glyma01g06250	Glyma01g06250	Gm01:6303783-6304910	14-13-0	14-13-14	NOTEST	0	0	0	0	1	1	no
Glyma01g06255	Glyma01g06255	Glyma01g06255	Gm01:6305430-6306253	14-13-0	14-13-14	NOTEST	0	0	0	0	1	1	no
Glyma01g06260	Glyma01g06260	Glyma01g06260	Gm01:6314251-6321822	14-13-0	14-13-14	OK	12.1423	6.28885	-0.949179	1.26927	0.204346	0.528981	no
Glyma01g06265	Glyma01g06265	Glyma01g06265	Gm01:6323487-6330290	14-13-0	14-13-14	OK	0.715642	0.203135	-1.8168	1.83273	0.0668424	0.274513	no
Glyma01g06270	Glyma01g06270	Glyma01g06270	Gm01:6353278-6357024	14-13-0	14-13-14	OK	7.06316	6.07106	-0.218365	0.289187	0.772438	0.94182	no
Glyma01g06281	Glyma01g06281	Glyma01g06281	Gm01:6358175-6364839	14-13-0	14-13-14	OK	1.48752	1.58456	0.0911693	-0.10072	0.919772	0.984054	no
Glyma01g06290	Glyma01g06290	Glyma01g06290	Gm01:6415709-6426123	14-13-0	14-13-14	OK	6.11544	4.7018	-0.379244	0.518901	0.60383	0.870364	no
Glyma01g06300	Glyma01g06300	Glyma01g06300	Gm01:6427320-6430789	14-13-0	14-13-14	OK	4.47919	3.14599	-0.509723	0.628277	0.529823	0.827523	no
Glyma01g06320	Glyma01g06320	Glyma01g06320	Gm01:6438347-6443201	14-13-0	14-13-14	OK	6.44942	4.85509	-0.40967	0.514142	0.607153	0.871685	no
Glyma01g06330	Glyma01g06330	Glyma01g06330	Gm01:6463489-6464681	14-13-0	14-13-14	NOTEST	0	0	0	0	1	1	no
Glyma01g06350	Glyma01g06350	Glyma01g06350	Gm01:6519357-6525574	14-13-0	14-13-14	NOTEST	0	0	0	0	1	1	no
Glyma01g06370	Glyma01g06370	Glyma01g06370	Gm01:6606759-6612290	14-13-0	14-13-14	OK	1.92752	0.570844	-1.75558	1.99147	0.0464291	0.221622	no
Glyma01g06380	Glyma01g06380	Glyma01g06380	Gm01:6619142-6624870	14-13-0	14-13-14	OK	5.16208	3.70317	-0.47919	0.543411	0.586847	0.86159	no
Glyma01g06403	Glyma01g06403	Glyma01g06403	Gm01:6653831-6654651	14-13-0	14-13-14	NOTEST	0	0	0	0	1	1	no
Glyma01g06426	Glyma01g06426	Glyma01g06426	Gm01:6655568-6658132	14-13-0	14-13-14	NOTEST	0	0	0	0	1	1	no
Glyma01g06450	Glyma01g06450	Glyma01g06450	Gm01:6697229-6704493	14-13-0	14-13-14	OK	3.8057	10.2697	1.43216	-1.93853	0.0525585	0.238144	no
Glyma01g06465	Glyma01g06465	Glyma01g06465	Gm01:6734268-6734951	14-13-0	14-13-14	NOTEST	0	0	0	0	1	1	no
Glyma01g06480	Glyma01g06480	Glyma01g06480	Gm01:6737090-6743586	14-13-0	14-13-14	OK	0.292169	0.59862	1.03483	-0.801016	0.423122	0.756201	no
Glyma01g06530	Glyma01g06530	Glyma01g06530	Gm01:6773745-6780125	14-13-0	14-13-14	NOTEST	0.102225	0.0305698	-1.74158	0.963126	0.335484	1	no
Glyma01g06540	Glyma01g06540	Glyma01g06540	Gm01:6785070-6791180	14-13-0	14-13-14	OK	4.09106	3.17756	-0.364556	0.359746	0.719037	0.920785	no
Glyma01g06550	Glyma01g06550	Glyma01g06550	Gm01:6797682-6802949	14-13-0	14-13-14	OK	1.0571	1.96229	0.892428	-0.972966	0.33057	0.67762	no
Glyma01g06575	Glyma01g06575	Glyma01g06575	Gm01:6821946-6822491	14-13-0	14-13-14	NOTEST	0	0	0	0	1	1	no
Glyma01g06600	Glyma01g06600	Glyma01g06600	Gm01:6945949-6947844	14-13-0	14-13-14	OK	14.9269	9.30621	-0.681644	0.787202	0.431163	0.762591	no
Glyma01g06610	Glyma01g06610	Glyma01g06610	Gm01:6949449-6956726	14-13-0	14-13-14	OK	0	1.26297	1.79769e+308	1.79769e+308	0.0675436	0.276045	no
Glyma01g06620	Glyma01g06620	Glyma01g06620	Gm01:6963802-6967415	14-13-0	14-13-14	OK	8.97063	5.46516	-0.714946	0.925215	0.354854	0.700381	no
Glyma01g06630	Glyma01g06630	Glyma01g06630	Gm01:6987088-6990503	14-13-0	14-13-14	OK	9.84328	7.23717	-0.443713	0.570124	0.568593	0.852058	no
Glyma01g06640	Glyma01g06640	Glyma01g06640	Gm01:6992005-6995011	14-13-0	14-13-14	OK	0.937233	4.61115	2.29865	-2.36756	0.0179059	0.12735	no
Glyma01g06660	Glyma01g06660	Glyma01g06660	Gm01:7007301-7012903	14-13-0	14-13-14	NOTEST	0.0354323	0.0337597	-0.0697606	0.0265534	0.978816	1	no
Glyma01g06671	Glyma01g06671	Glyma01g06671	Gm01:7051709-7055503	14-13-0	14-13-14	NOTEST	0	0	0	0	1	1	no
Glyma01g06681	Glyma01g06681	Glyma01g06681	Gm01:7074917-7078717	14-13-0	14-13-14	OK	3.46128	4.08719	0.239803	-0.333039	0.739104	0.929349	no
Glyma01g06690	Glyma01g06690	Glyma01g06690	Gm01:7089055-7091542	14-13-0	14-13-14	OK	0.728596	0.881445	0.274752	-0.270152	0.787044	0.946376	no
Glyma01g06700	Glyma01g06700	Glyma01g06700	Gm01:7093539-7097353	14-13-0	14-13-14	OK	1.87654	1.83686	-0.0308344	0.0280196	0.977646	0.996526	no
Glyma01g06720	Glyma01g06720	Glyma01g06720	Gm01:7128540-7130153	14-13-0	14-13-14	NOTEST	0	0	0	0	1	1	no
Glyma01g06730	Glyma01g06730	Glyma01g06730	Gm01:7131214-7140582	14-13-0	14-13-14	OK	1.80529	2.25536	0.321127	-0.383122	0.701629	0.91405	no
Glyma01g06740	Glyma01g06740	Glyma01g06740	Gm01:7146652-7148230	14-13-0	14-13-14	OK	81.6524	43.2971	-0.915225	0.912769	0.361364	0.705648	no
Glyma01g06750	Glyma01g06750	Glyma01g06750	Gm01:7149379-7152784	14-13-0	14-13-14	OK	6.28134	4.80526	-0.386458	0.425561	0.670427	0.900101	no
Glyma01g06762	Glyma01g06762	Glyma01g06762	Gm01:7159103-7161168	14-13-0	14-13-14	NOTEST	0	0	0	0	1	1	no
Glyma01g06774	Glyma01g06774	Glyma01g06774	Gm01:7193728-7195967	14-13-0	14-13-14	OK	0.605302	0	-1.79769e+308	-1.79769e+308	0.0368655	0.194923	no
Glyma01g06787	Glyma01g06787	Glyma01g06787	Gm01:7202426-7203771	14-13-0	14-13-14	OK	0.510678	0.429782	-0.248807	0.181069	0.856314	0.96811	no
Glyma01g06800	Glyma01g06800	Glyma01g06800	Gm01:7209667-7216248	14-13-0	14-13-14	OK	6.97829	4.83801	-0.52846	0.654445	0.512825	0.816507	no
Glyma01g06810	Glyma01g06810	Glyma01g06810	Gm01:7209667-7216248	14-13-0	14-13-14	OK	0.441599	1.11238	1.33285	-0.413036	0.67958	0.904566	no
Glyma01g06820	Glyma01g06820	Glyma01g06820	Gm01:7217423-7219310	14-13-0	14-13-14	OK	1.60063	0.393333	-2.02482	1.71961	0.0855033	0.319078	no
Glyma01g06830	Glyma01g06830	Glyma01g06830	Gm01:7247591-7249157	14-13-0	14-13-14	NOTEST	0	0	0	0	1	1	no
Glyma01g06840	Glyma01g06840	Glyma01g06840	Gm01:7250230-7254936	14-13-0	14-13-14	OK	17.5316	9.24759	-0.922812	1.26862	0.204577	0.529112	no
Glyma01g06850	Glyma01g06850	Glyma01g06850	Gm01:7272747-7275098	14-13-0	14-13-14	OK	2.56925	4.22428	0.717358	-0.851161	0.39468	0.734317	no
Glyma01g06860	Glyma01g06860	Glyma01g06860	Gm01:7277818-7281645	14-13-0	14-13-14	NOTEST	0	0	0	0	1	1	no
Glyma01g06870	Glyma01g06870	Glyma01g06870	Gm01:7343212-7351310	14-13-0	14-13-14	OK	2.26693	0.630686	-1.84575	1.51911	0.128736	0.406958	no
Glyma01g06880	Glyma01g06880	Glyma01g06880	Gm01:7358248-7360930	14-13-0	14-13-14	NOTEST	0.371326	0.0403181	-3.20319	2.4209	0.015482	1	no
Glyma01g06902	Glyma01g06902	Glyma01g06902	Gm01:7382653-7384804	14-13-0	14-13-14	NOTEST	0	0	0	0	1	1	no
Glyma01g06924	Glyma01g06924	Glyma01g06924	Gm01:7422342-7427765	14-13-0	14-13-14	NOTEST	0	0	0	0	1	1	no
Glyma01g06947	Glyma01g06947	Glyma01g06947	Gm01:7435646-7436810	14-13-0	14-13-14	NOTEST	0	0	0	0	1	1	no
Glyma01g06970	Glyma01g06970	Glyma01g06970	Gm01:7479447-7482232	14-13-0	14-13-14	OK	10.4171	20.5051	0.977029	-1.27444	0.202507	0.526347	no
Glyma01g06980	Glyma01g06980	Glyma01g06980	Gm01:7497548-7505696	14-13-0	14-13-14	NOTEST	0	0	0	0	1	1	no
Glyma01g06995	Glyma01g06995	Glyma01g06995	Gm01:7509309-7511663	14-13-0	14-13-14	NOTEST	0	0	0	0	1	1	no
Glyma01g07010	Glyma01g07010	Glyma01g07010	Gm01:7546180-7550537	14-13-0	14-13-14	OK	17.1451	3.49079	-2.29617	2.89916	0.00374169	0.0441711	yes
Glyma01g07020	Glyma01g07020	Glyma01g07020	Gm01:7562682-7571075	14-13-0	14-13-14	OK	1.87046	3.01128	0.686986	-0.530631	0.595674	0.866421	no
Glyma01g07040	Glyma01g07040	Glyma01g07040	Gm01:7573115-7574981	14-13-0	14-13-14	OK	1.55587	1.61069	0.0499548	-0.0540847	0.956868	0.992219	no
Glyma01g07046	Glyma01g07046	Glyma01g07046	Gm01:7576240-7581159	14-13-0	14-13-14	OK	0.455511	0	-1.79769e+308	-1.79769e+308	0.0482636	0.226896	no
Glyma01g07053	Glyma01g07053	Glyma01g07053	Gm01:7587960-7591978	14-13-0	14-13-14	NOTEST	0	0	0	0	1	1	no
Glyma01g07060	Glyma01g07060	Glyma01g07060	Gm01:7606030-7608993	14-13-0	14-13-14	NOTEST	0	0	0	0	1	1	no
Glyma01g07070	Glyma01g07070	Glyma01g07070	Gm01:7614281-7618124	14-13-0	14-13-14	OK	5.63344	10.312	0.872233	-1.18531	0.235894	0.570401	no
Glyma01g07080	Glyma01g07080	Glyma01g07080	Gm01:7621975-7627809	14-13-0	14-13-14	OK	0.156627	2.50361	3.99861	-0.0765596	0.938974	0.989155	no
Glyma01g07091	Glyma01g07091	Glyma01g07091	Gm01:7621975-7627809	14-13-0	14-13-14	OK	5.64994	3.75558	-0.589202	0.748016	0.45445	0.780919	no
Glyma01g07100	Glyma01g07100	Glyma01g07100	Gm01:7645596-7648115	14-13-0	14-13-14	OK	34.9284	17.468	-0.999683	1.32382	0.185564	0.503122	no
Glyma01g07110	Glyma01g07110	Glyma01g07110	Gm01:7657795-7664672	14-13-0	14-13-14	OK	0.240193	0.628163	1.38694	-1.16451	0.244218	0.579969	no
Glyma01g07120	Glyma01g07120	Glyma01g07120	Gm01:7694027-7700472	14-13-0	14-13-14	OK	35.205	16.7526	-1.07139	0.897453	0.369477	0.712738	no
Glyma01g07130	Glyma01g07130	Glyma01g07130	Gm01:7726769-7727260	14-13-0	14-13-14	OK	398.676	104.642	-1.92975	2.40918	0.0159883	0.118773	no
Glyma01g07140	Glyma01g07140	Glyma01g07140	Gm01:7745867-7748795	14-13-0	14-13-14	OK	0.876185	0.753539	-0.217553	0.207945	0.835272	0.961609	no
Glyma01g07150	Glyma01g07150	Glyma01g07150	Gm01:7755456-7755710	14-13-0	14-13-14	NOTEST	0	0	0	0	1	1	no
Glyma01g07155	Glyma01g07155	Glyma01g07155	Gm01:7761366-7761600	14-13-0	14-13-14	OK	4.83015	2.61498	-0.885268	0.418381	0.675669	0.903077	no
Glyma01g07160	Glyma01g07160	Glyma01g07160	Gm01:7762334-7764158	14-13-0	14-13-14	OK	0.897257	0.737858	-0.282177	0.258492	0.796027	0.949628	no
Glyma01g07175	Glyma01g07175	Glyma01g07175	Gm01:7777226-7781079	14-13-0	14-13-14	OK	3.69687	3.59678	-0.0396008	0.0485058	0.961313	0.993345	no
Glyma01g07190	Glyma01g07190	Glyma01g07190	Gm01:7781287-7786746	14-13-0	14-13-14	OK	2.54413	3.0172	0.246038	-0.245096	0.806382	0.952371	no
Glyma01g07212	Glyma01g07212	Glyma01g07212	Gm01:7794008-7794422	14-13-0	14-13-14	NOTEST	0	0	0	0	1	1	no
Glyma01g07234	Glyma01g07234	Glyma01g07234	Gm01:7804303-7805165	14-13-0	14-13-14	NOTEST	0	0	0	0	1	1	no
Glyma01g07256	Glyma01g07256	Glyma01g07256	Gm01:7805183-7807029	14-13-0	14-13-14	NOTEST	0	0	0	0	1	1	no
Glyma01g07278	Glyma01g07278	Glyma01g07278	Gm01:7894471-7899056	14-13-0	14-13-14	NOTEST	0	0	0	0	1	1	no
Glyma01g07300	Glyma01g07300	Glyma01g07300	Gm01:7959018-7960497	14-13-0	14-13-14	OK	1.16179	0.885244	-0.392201	0.357728	0.720547	0.921168	no
Glyma01g07310	Glyma01g07310	Glyma01g07310	Gm01:7961184-7963298	14-13-0	14-13-14	OK	1.8103	2.60847	0.526974	-0.482065	0.62976	0.882883	no
Glyma01g07320	Glyma01g07320	Glyma01g07320	Gm01:7976530-7977692	14-13-0	14-13-14	NOTEST	0	0	0	0	1	1	no
Glyma01g07343	Glyma01g07343	Glyma01g07343	Gm01:8062113-8062653	14-13-0	14-13-14	NOTEST	0	0	0	0	1	1	no
Glyma01g07366	Glyma01g07366	Glyma01g07366	Gm01:8067733-8073984	14-13-0	14-13-14	NOTEST	0	0	0	0	1	1	no
Glyma01g07390	Glyma01g07390	Glyma01g07390	Gm01:8081945-8087022	14-13-0	14-13-14	OK	1.14593	0.445442	-1.36321	1.22577	0.220285	0.549558	no
Glyma01g07416	Glyma01g07416	Glyma01g07416	Gm01:8182612-8184549	14-13-0	14-13-14	NOTEST	0	0	0	0	1	1	no
Glyma01g07443	Glyma01g07443	Glyma01g07443	Gm01:8199812-8203907	14-13-0	14-13-14	NOTEST	0	0	0	0	1	1	no
Glyma01g07470	Glyma01g07470	Glyma01g07470	Gm01:8280629-8281870	14-13-0	14-13-14	NOTEST	0	0	0	0	1	1	no
Glyma01g07500	Glyma01g07500	Glyma01g07500	Gm01:8288472-8290635	14-13-0	14-13-14	NOTEST	0	0	0	0	1	1	no
Glyma01g07530	Glyma01g07530	Glyma01g07530	Gm01:8321044-8331324	14-13-0	14-13-14	OK	5.44043	3.4575	-0.653992	0.898131	0.369116	0.71237	no
Glyma01g07542	Glyma01g07542	Glyma01g07542	Gm01:8338977-8341376	14-13-0	14-13-14	OK	0.729549	0.339862	-1.10205	0.90805	0.363852	0.70799	no
Glyma01g07554	Glyma01g07554	Glyma01g07554	Gm01:8344184-8347552	14-13-0	14-13-14	OK	41.6833	23.013	-0.857021	1.16381	0.2445	0.580267	no
Glyma01g07567	Glyma01g07567	Glyma01g07567	Gm01:8348953-8350397	14-13-0	14-13-14	OK	0.377012	27.3369	6.18009	-6.07518	1.23852e-09	3.57345e-07	yes
Glyma01g07580	Glyma01g07580	Glyma01g07580	Gm01:8387061-8389448	14-13-0	14-13-14	OK	18.1136	0.0160096	-10.1439	5.62867	1.81601e-08	3.187e-06	yes
Glyma01g07601	Glyma01g07601	Glyma01g07601	Gm01:8400738-8401869	14-13-0	14-13-14	NOTEST	0	0.0578288	1.79769e+308	1.79769e+308	0.200203	1	no
Glyma01g07621	Glyma01g07621	Glyma01g07621	Gm01:8410014-8411417	14-13-0	14-13-14	NOTEST	0	0	0	0	1	1	no
Glyma01g07641	Glyma01g07641	Glyma01g07641	Gm01:8426105-8455213	14-13-0	14-13-14	OK	4.75067	4.16102	-0.191197	0.263559	0.79212	0.948061	no
Glyma01g07661	Glyma01g07661	Glyma01g07661	Gm01:8426105-8455213	14-13-0	14-13-14	NOTEST	0.148752	0.0975459	-0.608753	0.103737	0.917378	1	no
Glyma01g07680	Glyma01g07680	Glyma01g07680	Gm01:8471437-8478753	14-13-0	14-13-14	OK	2.56269	4.74291	0.888112	-1.2179	0.223262	0.553135	no
Glyma01g07690	Glyma01g07690	Glyma01g07690	Gm01:8483094-8485802	14-13-0	14-13-14	OK	2.32909	0.864956	-1.42907	1.64831	0.09929	0.348821	no
Glyma01g07716	Glyma01g07716	Glyma01g07716	Gm01:8488370-8491061	14-13-0	14-13-14	NOTEST	0	0	0	0	1	1	no
Glyma01g07743	Glyma01g07743	Glyma01g07743	Gm01:8512443-8513748	14-13-0	14-13-14	NOTEST	0	0.0886887	1.79769e+308	1.79769e+308	0.117179	1	no
Glyma01g07770	Glyma01g07770	Glyma01g07770	Gm01:8571080-8576705	14-13-0	14-13-14	OK	15.4456	4.3307	-1.83452	2.36287	0.0181342	0.12825	no
Glyma01g07780	Glyma01g07780	Glyma01g07780	Gm01:8580150-8584320	14-13-0	14-13-14	OK	6.2734	7.62841	0.282134	-0.391664	0.695307	0.911006	no
Glyma01g07791	Glyma01g07791	Glyma01g07791	Gm01:8585310-8588909	14-13-0	14-13-14	OK	1.08767	0.697545	-0.640886	0.604739	0.545352	0.837837	no
Glyma01g07800	Glyma01g07800	Glyma01g07800	Gm01:8594093-8595436	14-13-0	14-13-14	OK	8.63742	7.01599	-0.299954	0.399518	0.689511	0.908399	no
Glyma01g07860	Glyma01g07860	Glyma01g07860	Gm01:8667868-8673493	14-13-0	14-13-14	OK	0	5.65526	1.79769e+308	1.79769e+308	0.00229763	0.0311529	yes
Glyma01g07876	Glyma01g07876	Glyma01g07876	Gm01:8788410-8789743	14-13-0	14-13-14	NOTEST	0	0	0	0	1	1	no
Glyma01g07893	Glyma01g07893	Glyma01g07893	Gm01:8792135-8793707	14-13-0	14-13-14	NOTEST	0	0	0	0	1	1	no
Glyma01g07910	Glyma01g07910	Glyma01g07910	Gm01:8838722-8843110	14-13-0	14-13-14	NOTEST	0	0	0	0	1	1	no
Glyma01g07930	Glyma01g07930	Glyma01g07930	Gm01:8874759-8878203	14-13-0	14-13-14	OK	12.7144	17.3175	0.445768	-0.608798	0.542659	0.836253	no
Glyma01g07940	Glyma01g07940	Glyma01g07940	Gm01:8910470-8913789	14-13-0	14-13-14	OK	1.63583	4.93367	1.59264	-1.89446	0.0581641	0.253525	no
Glyma01g07970	Glyma01g07970	Glyma01g07970	Gm01:8936938-8942561	14-13-0	14-13-14	NOTEST	0	0	0	0	1	1	no
Glyma01g07985	Glyma01g07985	Glyma01g07985	Gm01:8949064-8950284	14-13-0	14-13-14	NOTEST	0	0	0	0	1	1	no
Glyma01g08001	Glyma01g08001	Glyma01g08001	Gm01:8978273-8979785	14-13-0	14-13-14	NOTEST	0	0	0	0	1	1	no
Glyma01g08015	Glyma01g08015	Glyma01g08015	Gm01:8998365-8999926	14-13-0	14-13-14	NOTEST	0	0	0	0	1	1	no
Glyma01g08030	Glyma01g08030	Glyma01g08030	Gm01:9017676-9019966	14-13-0	14-13-14	NOTEST	0	0	0	0	1	1	no
Glyma01g08043	Glyma01g08043	Glyma01g08043	Gm01:9021976-9042121	14-13-0	14-13-14	OK	1.54072	1.15447	-0.416372	0.537701	0.590784	0.863519	no
Glyma01g08056	Glyma01g08056	Glyma01g08056	Gm01:9051046-9057050	14-13-0	14-13-14	OK	1.80931	1.95349	0.110614	-0.100946	0.919594	0.984054	no
Glyma01g08070	Glyma01g08070	Glyma01g08070	Gm01:9109611-9110650	14-13-0	14-13-14	NOTEST	0	0	0	0	1	1	no
Glyma01g08080	Glyma01g08080	Glyma01g08080	Gm01:9174134-9176210	14-13-0	14-13-14	OK	0.958527	0.293235	-1.70876	1.56275	0.118111	0.387474	no
Glyma01g08096	Glyma01g08096	Glyma01g08096	Gm01:9198539-9199466	14-13-0	14-13-14	NOTEST	0	0	0	0	1	1	no
Glyma01g08113	Glyma01g08113	Glyma01g08113	Gm01:9252869-9254570	14-13-0	14-13-14	NOTEST	0	0.0748453	1.79769e+308	1.79769e+308	0.200203	1	no
Glyma01g08130	Glyma01g08130	Glyma01g08130	Gm01:9331637-9344994	14-13-0	14-13-14	NOTEST	0	0	0	0	1	1	no
Glyma01g08150	Glyma01g08150	Glyma01g08150	Gm01:9446809-9451393	14-13-0	14-13-14	NOTEST	0.255785	0	-1.79769e+308	-1.79769e+308	0.0525576	1	no
Glyma01g08191	Glyma01g08191	Glyma01g08191	Gm01:9525972-9529696	14-13-0	14-13-14	NOTEST	0	0	0	0	1	1	no
Glyma01g08230	Glyma01g08230	Glyma01g08230	Gm01:9575252-9581967	14-13-0	14-13-14	OK	4.5458	4.23277	-0.102933	0.139397	0.889137	0.976122	no
Glyma01g08250	Glyma01g08250	Glyma01g08250	Gm01:9636460-9637409	14-13-0	14-13-14	NOTEST	0	0	0	0	1	1	no
Glyma01g08260	Glyma01g08260	Glyma01g08260	Gm01:9642089-9646537	14-13-0	14-13-14	OK	0.779988	1.64956	1.08056	-0.876153	0.380947	0.722316	no
Glyma01g08400	Glyma01g08400	Glyma01g08400	Gm01:9844796-9845510	14-13-0	14-13-14	NOTEST	0	0	0	0	1	1	no
Glyma01g08540	Glyma01g08540	Glyma01g08540	Gm01:9914169-9919593	14-13-0	14-13-14	OK	4.48166	3.72625	-0.266308	0.309925	0.756618	0.936415	no
Glyma01g08560	Glyma01g08560	Glyma01g08560	Gm01:9947412-9949603	14-13-0	14-13-14	NOTEST	0	0	0	0	1	1	no
Glyma01g08580	Glyma01g08580	Glyma01g08580	Gm01:9980287-9986041	14-13-0	14-13-14	OK	10.0999	12.2451	0.277862	-0.384505	0.700604	0.913904	no
Glyma01g08586	Glyma01g08586	Glyma01g08586	Gm01:10000985-10002625	14-13-0	14-13-14	NOTEST	0	0	0	0	1	1	no
Glyma01g08593	Glyma01g08593	Glyma01g08593	Gm01:10003770-10020103	14-13-0	14-13-14	NOTEST	0	0	0	0	1	1	no
Glyma01g08600	Glyma01g08600	Glyma01g08600	Gm01:10022026-10027778	14-13-0	14-13-14	OK	11.069	5.65179	-0.96974	1.14679	0.25147	0.588988	no
Glyma01g08610	Glyma01g08610	Glyma01g08610	Gm01:10032095-10036624	14-13-0	14-13-14	NOTEST	0	0.0664188	1.79769e+308	1.79769e+308	0.117179	1	no
Glyma01g08621	Glyma01g08621	Glyma01g08621	Gm01:10051789-10059800	14-13-0	14-13-14	NOTEST	0	0	0	0	1	1	no
Glyma01g08631	Glyma01g08631	Glyma01g08631	Gm01:10051789-10059800	14-13-0	14-13-14	NOTEST	0	0	0	0	1	1	no
Glyma01g08640	Glyma01g08640	Glyma01g08640	Gm01:10086673-10091927	14-13-0	14-13-14	NOTEST	0.01866	0.00899924	-1.05207	0.415123	0.678052	1	no
Glyma01g08650	Glyma01g08650	Glyma01g08650	Gm01:10086673-10091927	14-13-0	14-13-14	NOTEST	0.152353	0	-1.79769e+308	-1.79769e+308	0.168627	1	no
Glyma01g08690	Glyma01g08690	Glyma01g08690	Gm01:10142572-10144504	14-13-0	14-13-14	NOTEST	0	0	0	0	1	1	no
Glyma01g08730	Glyma01g08730	Glyma01g08730	Gm01:10288660-10290556	14-13-0	14-13-14	NOTEST	0	0	0	0	1	1	no
Glyma01g08745	Glyma01g08745	Glyma01g08745	Gm01:10293654-10294541	14-13-0	14-13-14	NOTEST	0	0	0	0	1	1	no
Glyma01g08760	Glyma01g08760	Glyma01g08760	Gm01:10355582-10357514	14-13-0	14-13-14	NOTEST	0	0	0	0	1	1	no
Glyma01g08870	Glyma01g08870	Glyma01g08870	Gm01:10370136-10371995	14-13-0	14-13-14	NOTEST	0	0	0	0	1	1	no
Glyma01g08980	Glyma01g08980	Glyma01g08980	Gm01:10504878-10510246	14-13-0	14-13-14	NOTEST	0	0	0	0	1	1	no
Glyma01g09000	Glyma01g09000	Glyma01g09000	Gm01:10570987-10572412	14-13-0	14-13-14	NOTEST	0	0	0	0	1	1	no
Glyma01g09010	Glyma01g09010	Glyma01g09010	Gm01:10577946-10583595	14-13-0	14-13-14	OK	10.9702	8.38369	-0.387931	0.451821	0.651398	0.892912	no
Glyma01g09040	Glyma01g09040	Glyma01g09040	Gm01:10601638-10602621	14-13-0	14-13-14	NOTEST	0	0	0	0	1	1	no
Glyma01g09066	Glyma01g09066	Glyma01g09066	Gm01:10604268-10604624	14-13-0	14-13-14	NOTEST	0	0	0	0	1	1	no
Glyma01g09093	Glyma01g09093	Glyma01g09093	Gm01:10716118-10717174	14-13-0	14-13-14	NOTEST	0	0	0	0	1	1	no
Glyma01g09120	Glyma01g09120	Glyma01g09120	Gm01:10765526-10768563	14-13-0	14-13-14	OK	10.8075	8.09401	-0.417107	0.558473	0.576521	0.855547	no
Glyma01g09160	Glyma01g09160	Glyma01g09160	Gm01:10877246-10880169	14-13-0	14-13-14	OK	3.15498	4.43188	0.490289	-0.630537	0.528343	0.826615	no
Glyma01g09190	Glyma01g09190	Glyma01g09190	Gm01:10916139-10919654	14-13-0	14-13-14	NOTEST	0	0	0	0	1	1	no
Glyma01g09205	Glyma01g09205	Glyma01g09205	Gm01:10925539-10932891	14-13-0	14-13-14	OK	1.05494	0.187302	-2.49372	1.94708	0.0515255	0.235739	no
Glyma01g09220	Glyma01g09220	Glyma01g09220	Gm01:10985768-10988999	14-13-0	14-13-14	OK	3.04801	3.80598	0.320401	-0.3983	0.690409	0.908782	no
Glyma01g09251	Glyma01g09251	Glyma01g09251	Gm01:11062433-11064112	14-13-0	14-13-14	NOTEST	0	0	0	0	1	1	no
Glyma01g09280	Glyma01g09280	Glyma01g09280	Gm01:11172148-11173850	14-13-0	14-13-14	NOTEST	0	0	0	0	1	1	no
Glyma01g09290	Glyma01g09290	Glyma01g09290	Gm01:11208547-11216038	14-13-0	14-13-14	OK	7.949	4.32128	-0.879314	1.17842	0.238629	0.573067	no
Glyma01g09310	Glyma01g09310	Glyma01g09310	Gm01:11247803-11256961	14-13-0	14-13-14	OK	104.879	29.9095	-1.81005	1.64283	0.100418	0.351406	no
Glyma01g09340	Glyma01g09340	Glyma01g09340	Gm01:11290152-11290409	14-13-0	14-13-14	NOTEST	0	0	0	0	1	1	no
Glyma01g09350	Glyma01g09350	Glyma01g09350	Gm01:11294639-11296592	14-13-0	14-13-14	NOTEST	0	0	0	0	1	1	no
Glyma01g09360	Glyma01g09360	Glyma01g09360	Gm01:11308064-11312690	14-13-0	14-13-14	OK	1.44384	1.91989	0.411116	-0.411653	0.680594	0.905101	no
Glyma01g09381	Glyma01g09381	Glyma01g09381	Gm01:11366555-11369128	14-13-0	14-13-14	NOTEST	0	0	0	0	1	1	no
Glyma01g09400	Glyma01g09400	Glyma01g09400	Gm01:11464172-11469476	14-13-0	14-13-14	OK	6.46399	8.21989	0.346695	-0.394012	0.693572	0.910309	no
Glyma01g09410	Glyma01g09410	Glyma01g09410	Gm01:11464172-11469476	14-13-0	14-13-14	NOTEST	0	0	0	0	1	1	no
Glyma01g09420	Glyma01g09420	Glyma01g09420	Gm01:11496634-11503018	14-13-0	14-13-14	OK	3.69112	3.30959	-0.157408	0.195802	0.844765	0.965162	no
Glyma01g09460	Glyma01g09460	Glyma01g09460	Gm01:11555183-11556227	14-13-0	14-13-14	OK	0.681186	2.75084	2.01375	-1.7847	0.0743107	0.292872	no
Glyma01g09481	Glyma01g09481	Glyma01g09481	Gm01:11560220-11561128	14-13-0	14-13-14	NOTEST	0	0	0	0	1	1	no
Glyma01g09500	Glyma01g09500	Glyma01g09500	Gm01:11608787-11608970	14-13-0	14-13-14	NOTEST	0	0	0	0	1	1	no
Glyma01g09510	Glyma01g09510	Glyma01g09510	Gm01:11675230-11676337	14-13-0	14-13-14	NOTEST	0.0721066	0	-1.79769e+308	-1.79769e+308	0.122021	1	no
Glyma01g09515	Glyma01g09515	Glyma01g09515	Gm01:11687514-11688465	14-13-0	14-13-14	NOTEST	0	0	0	0	1	1	no
Glyma01g09520	Glyma01g09520	Glyma01g09520	Gm01:11695475-11701510	14-13-0	14-13-14	OK	17.8428	25.5628	0.51871	-0.636298	0.524582	0.823684	no
Glyma01g09530	Glyma01g09530	Glyma01g09530	Gm01:11703243-11703468	14-13-0	14-13-14	NOTEST	0	0	0	0	1	1	no
Glyma01g09540	Glyma01g09540	Glyma01g09540	Gm01:11708034-11708550	14-13-0	14-13-14	NOTEST	0	0	0	0	1	1	no
Glyma01g09581	Glyma01g09581	Glyma01g09581	Gm01:11738401-11738872	14-13-0	14-13-14	OK	0	1.22506	1.79769e+308	1.79769e+308	0.0573281	0.251002	no
Glyma01g09620	Glyma01g09620	Glyma01g09620	Gm01:11916861-11920298	14-13-0	14-13-14	NOTEST	0	0	0	0	1	1	no
Glyma01g09631	Glyma01g09631	Glyma01g09631	Gm01:11934522-11935027	14-13-0	14-13-14	NOTEST	0	0	0	0	1	1	no
Glyma01g09640	Glyma01g09640	Glyma01g09640	Gm01:11967121-11968573	14-13-0	14-13-14	OK	4.66989	2.77314	-0.751869	0.898443	0.368949	0.712216	no
Glyma01g09650	Glyma01g09650	Glyma01g09650	Gm01:11971139-11974007	14-13-0	14-13-14	NOTEST	0	0.0634392	1.79769e+308	1.79769e+308	0.117179	1	no
Glyma01g09660	Glyma01g09660	Glyma01g09660	Gm01:11996466-12008222	14-13-0	14-13-14	OK	2.77275	1.18074	-1.23162	1.30649	0.191386	0.511736	no
Glyma01g09860	Glyma01g09860	Glyma01g09860	Gm01:12384414-12385443	14-13-0	14-13-14	NOTEST	0	0	0	0	1	1	no
Glyma01g09900	Glyma01g09900	Glyma01g09900	Gm01:12528614-12537191	14-13-0	14-13-14	OK	0.473484	0.0491326	-3.26856	1.67372	0.094186	0.337792	no
Glyma01g09920	Glyma01g09920	Glyma01g09920	Gm01:12588417-12590126	14-13-0	14-13-14	OK	3.67089	4.22012	0.201153	-0.243179	0.807867	0.952564	no
Glyma01g09948	Glyma01g09948	Glyma01g09948	Gm01:12598148-12598766	14-13-0	14-13-14	NOTEST	0	0	0	0	1	1	no
Glyma01g09976	Glyma01g09976	Glyma01g09976	Gm01:12599050-12599537	14-13-0	14-13-14	NOTEST	0	0	0	0	1	1	no
Glyma01g10004	Glyma01g10004	Glyma01g10004	Gm01:12745024-12746402	14-13-0	14-13-14	NOTEST	0	0	0	0	1	1	no
Glyma01g10032	Glyma01g10032	Glyma01g10032	Gm01:12760733-12762383	14-13-0	14-13-14	NOTEST	0	0	0	0	1	1	no
Glyma01g10060	Glyma01g10060	Glyma01g10060	Gm01:12803637-12806519	14-13-0	14-13-14	NOTEST	0	0	0	0	1	1	no
Glyma01g10070	Glyma01g10070	Glyma01g10070	Gm01:12864161-12867113	14-13-0	14-13-14	LOWDATA	0	0	-3.18207	0	1	1	no
Glyma01g10081	Glyma01g10081	Glyma01g10081	Gm01:12864161-12867113	14-13-0	14-13-14	OK	378.173	41.667	-3.18207	2.38857	0.0169142	0.122843	no
Glyma01g10090	Glyma01g10090	Glyma01g10090	Gm01:12870303-12870537	14-13-0	14-13-14	NOTEST	0	0	0	0	1	1	no
Glyma01g10100	Glyma01g10100	Glyma01g10100	Gm01:12915879-12921146	14-13-0	14-13-14	OK	1.53747	0.840987	-0.870402	0.970866	0.331615	0.678775	no
Glyma01g10121	Glyma01g10121	Glyma01g10121	Gm01:13008740-13009964	14-13-0	14-13-14	NOTEST	0.114714	0	-1.79769e+308	-1.79769e+308	0.122021	1	no
Glyma01g10141	Glyma01g10141	Glyma01g10141	Gm01:13045087-13045509	14-13-0	14-13-14	NOTEST	0	0	0	0	1	1	no
Glyma01g10160	Glyma01g10160	Glyma01g10160	Gm01:13068289-13070591	14-13-0	14-13-14	OK	1.45591	1.85659	0.350736	-0.27833	0.780759	0.944368	no
Glyma01g10183	Glyma01g10183	Glyma01g10183	Gm01:13094881-13100738	14-13-0	14-13-14	NOTEST	0	0	0	0	1	1	no
Glyma01g10206	Glyma01g10206	Glyma01g10206	Gm01:13259515-13263715	14-13-0	14-13-14	NOTEST	0	0	0	0	1	1	no
Glyma01g10231	Glyma01g10231	Glyma01g10231	Gm01:13305441-13308517	14-13-0	14-13-14	NOTEST	0	0	0	0	1	1	no
Glyma01g10254	Glyma01g10254	Glyma01g10254	Gm01:13309389-13321481	14-13-0	14-13-14	NOTEST	0	0.00728922	1.79769e+308	1.79769e+308	0.200203	1	no
Glyma01g10278	Glyma01g10278	Glyma01g10278	Gm01:13324783-13327645	14-13-0	14-13-14	NOTEST	0	0	0	0	1	1	no
Glyma01g10302	Glyma01g10302	Glyma01g10302	Gm01:13355409-13356481	14-13-0	14-13-14	NOTEST	0	0	0	0	1	1	no
Glyma01g10326	Glyma01g10326	Glyma01g10326	Gm01:13416710-13417813	14-13-0	14-13-14	NOTEST	0	0	0	0	1	1	no
Glyma01g10350	Glyma01g10350	Glyma01g10350	Gm01:13419562-13420937	14-13-0	14-13-14	NOTEST	0	0	0	0	1	1	no
Glyma01g10371	Glyma01g10371	Glyma01g10371	Gm01:13433576-13434202	14-13-0	14-13-14	OK	2.15207	2.24114	0.0585058	-0.0543189	0.956681	0.992176	no
Glyma01g10390	Glyma01g10390	Glyma01g10390	Gm01:13444506-13445181	14-13-0	14-13-14	NOTEST	0.259446	0.267086	0.0418716	-0.0241527	0.980731	1	no
Glyma01g10600	Glyma01g10600	Glyma01g10600	Gm01:13782194-13783121	14-13-0	14-13-14	NOTEST	0	0.131999	1.79769e+308	1.79769e+308	0.0878604	1	no
Glyma01g10610	Glyma01g10610	Glyma01g10610	Gm01:13795843-13799755	14-13-0	14-13-14	OK	2.78232	5.70704	1.03646	-1.36582	0.171995	0.482629	no
Glyma01g10730	Glyma01g10730	Glyma01g10730	Gm01:13960625-13962588	14-13-0	14-13-14	OK	0.540612	0.588507	0.122466	-0.105183	0.916231	0.983018	no
Glyma01g10850	Glyma01g10850	Glyma01g10850	Gm01:14070871-14087892	14-13-0	14-13-14	OK	3.715	1.59001	-1.22432	1.40294	0.160635	0.462688	no
Glyma01g10880	Glyma01g10880	Glyma01g10880	Gm01:14112119-14118766	14-13-0	14-13-14	OK	3.05295	2.59885	-0.232333	0.265858	0.790349	0.947472	no
Glyma01g10900	Glyma01g10900	Glyma01g10900	Gm01:14129302-14130710	14-13-0	14-13-14	NOTEST	0	0	0	0	1	1	no
Glyma01g11110	Glyma01g11110	Glyma01g11110	Gm01:14247142-14248189	14-13-0	14-13-14	NOTEST	0	0.074274	1.79769e+308	1.79769e+308	0.117179	1	no
Glyma01g11130	Glyma01g11130	Glyma01g11130	Gm01:14320794-14324110	14-13-0	14-13-14	OK	0.0691242	0.598833	3.11489	-2.09149	0.0364846	0.193754	no
Glyma01g11180	Glyma01g11180	Glyma01g11180	Gm01:14568533-14568824	14-13-0	14-13-14	OK	30590.2	6636.76	-2.20452	1.38597	0.165756	0.472128	no
Glyma01g11390	Glyma01g11390	Glyma01g11390	Gm01:14807028-14809655	14-13-0	14-13-14	OK	17.8187	6.83815	-1.38171	1.59429	0.110872	0.373442	no
Glyma01g11473	Glyma01g11473	Glyma01g11473	Gm01:14947313-14947773	14-13-0	14-13-14	NOTEST	0	0	0	0	1	1	no
Glyma01g11556	Glyma01g11556	Glyma01g11556	Gm01:14947841-14948129	14-13-0	14-13-14	NOTEST	0	0	0	0	1	1	no
Glyma01g11640	Glyma01g11640	Glyma01g11640	Gm01:14972818-14973806	14-13-0	14-13-14	OK	171.248	14.9407	-3.51877	4.11623	3.85113e-05	0.0013244	yes
Glyma01g11755	Glyma01g11755	Glyma01g11755	Gm01:15083417-15085790	14-13-0	14-13-14	NOTEST	0	0	0	0	1	1	no
Glyma01g11870	Glyma01g11870	Glyma01g11870	Gm01:15195053-15195880	14-13-0	14-13-14	OK	78.9492	40.5038	-0.962868	1.25568	0.209231	0.534957	no
Glyma01g12310	Glyma01g12310	Glyma01g12310	Gm01:15500343-15500912	14-13-0	14-13-14	NOTEST	0	0	0	0	1	1	no
Glyma01g12340	Glyma01g12340	Glyma01g12340	Gm01:15542210-15548262	14-13-0	14-13-14	OK	8.98308	11.0943	0.304538	-0.395842	0.692222	0.909851	no
Glyma01g12740	Glyma01g12740	Glyma01g12740	Gm01:15937028-15939729	14-13-0	14-13-14	OK	5.14539	3.90526	-0.397862	0.551737	0.581129	0.857955	no
Glyma01g12840	Glyma01g12840	Glyma01g12840	Gm01:15948220-15953470	14-13-0	14-13-14	OK	0	0.521551	1.79769e+308	1.79769e+308	0.0777424	0.301033	no
Glyma01g12940	Glyma01g12940	Glyma01g12940	Gm01:16087453-16089518	14-13-0	14-13-14	OK	0.305672	1.35645	2.14978	-1.95523	0.0505555	0.233511	no
Glyma01g12955	Glyma01g12955	Glyma01g12955	Gm01:16103170-16106499	14-13-0	14-13-14	NOTEST	0	0	0	0	1	1	no
Glyma01g12970	Glyma01g12970	Glyma01g12970	Gm01:16134796-16136261	14-13-0	14-13-14	OK	4.23776	7.05883	0.736126	-0.969268	0.332412	0.679594	no
Glyma01g13170	Glyma01g13170	Glyma01g13170	Gm01:16335425-16339127	14-13-0	14-13-14	OK	146.648	33.2515	-2.14086	1.89766	0.0577405	0.252062	no
Glyma01g13390	Glyma01g13390	Glyma01g13390	Gm01:16722784-16724403	14-13-0	14-13-14	NOTEST	0	0	0	0	1	1	no
Glyma01g13400	Glyma01g13400	Glyma01g13400	Gm01:16727753-16728455	14-13-0	14-13-14	NOTEST	0	0	0	0	1	1	no
Glyma01g13410	Glyma01g13410	Glyma01g13410	Gm01:16732842-16733939	14-13-0	14-13-14	NOTEST	0	0.416107	1.79769e+308	1.79769e+308	0.0456888	1	no
Glyma01g13532	Glyma01g13532	Glyma01g13532	Gm01:16745457-16750194	14-13-0	14-13-14	OK	0.467454	0.486841	0.0586264	-0.0423534	0.966217	0.994153	no
Glyma01g13654	Glyma01g13654	Glyma01g13654	Gm01:16827427-16868761	14-13-0	14-13-14	OK	3.47758	3.14105	-0.146835	0.179556	0.857501	0.968501	no
Glyma01g13777	Glyma01g13777	Glyma01g13777	Gm01:16940733-16941754	14-13-0	14-13-14	NOTEST	0	0	0	0	1	1	no
Glyma01g13900	Glyma01g13900	Glyma01g13900	Gm01:17306260-17308391	14-13-0	14-13-14	NOTEST	0	0.0696741	1.79769e+308	1.79769e+308	0.0878604	1	no
Glyma01g13930	Glyma01g13930	Glyma01g13930	Gm01:17320003-17321677	14-13-0	14-13-14	NOTEST	0.410213	0.27617	-0.570818	0.471775	0.637088	1	no
Glyma01g13945	Glyma01g13945	Glyma01g13945	Gm01:17420498-17470577	14-13-0	14-13-14	OK	0.513847	0.320787	-0.679722	0.622648	0.533516	0.829295	no
Glyma01g13960	Glyma01g13960	Glyma01g13960	Gm01:17481711-17482061	14-13-0	14-13-14	NOTEST	0	0	0	0	1	1	no
Glyma01g14160	Glyma01g14160	Glyma01g14160	Gm01:17627819-17629241	14-13-0	14-13-14	NOTEST	0	0	0	0	1	1	no
Glyma01g14266	Glyma01g14266	Glyma01g14266	Gm01:17633685-17639586	14-13-0	14-13-14	NOTEST	0	0	0	0	1	1	no
Glyma01g14373	Glyma01g14373	Glyma01g14373	Gm01:18006948-18034570	14-13-0	14-13-14	OK	8.19056	7.14354	-0.197322	0.270748	0.786585	0.946058	no
Glyma01g14480	Glyma01g14480	Glyma01g14480	Gm01:18042133-18046082	14-13-0	14-13-14	OK	37.1424	16.8468	-1.14059	1.55705	0.119457	0.389648	no
Glyma01g14500	Glyma01g14500	Glyma01g14500	Gm01:18130228-18132625	14-13-0	14-13-14	NOTEST	0	0	0	0	1	1	no
Glyma01g14700	Glyma01g14700	Glyma01g14700	Gm01:18300892-18301399	14-13-0	14-13-14	OK	7.20099	2.86114	-1.33161	1.3066	0.191349	0.511736	no
Glyma01g14733	Glyma01g14733	Glyma01g14733	Gm01:18318922-18323085	14-13-0	14-13-14	OK	0.922842	0.937942	0.0234147	-0.023498	0.981253	0.996736	no
Glyma01g14766	Glyma01g14766	Glyma01g14766	Gm01:18346082-18347761	14-13-0	14-13-14	OK	0.321137	0.502504	0.645945	-0.55066	0.581867	0.858521	no
Glyma01g14800	Glyma01g14800	Glyma01g14800	Gm01:18356149-18373966	14-13-0	14-13-14	OK	6.91992	4.03197	-0.779271	1.02919	0.303393	0.649887	no
Glyma01g14905	Glyma01g14905	Glyma01g14905	Gm01:18507857-18508875	14-13-0	14-13-14	NOTEST	0	0	0	0	1	1	no
Glyma01g15010	Glyma01g15010	Glyma01g15010	Gm01:18517441-18518370	14-13-0	14-13-14	NOTEST	0	0	0	0	1	1	no
Glyma01g15134	Glyma01g15134	Glyma01g15134	Gm01:18526281-18533321	14-13-0	14-13-14	OK	2.2679	1.01935	-1.15371	1.24002	0.214966	0.54242	no
Glyma01g15258	Glyma01g15258	Glyma01g15258	Gm01:18637238-18640215	14-13-0	14-13-14	OK	0	0.669166	1.79769e+308	1.79769e+308	0.0328834	0.182426	no
Glyma01g15382	Glyma01g15382	Glyma01g15382	Gm01:18694961-18695204	14-13-0	14-13-14	NOTEST	0	0	0	0	1	1	no
Glyma01g15506	Glyma01g15506	Glyma01g15506	Gm01:18952413-18962622	14-13-0	14-13-14	OK	38.0668	13.3253	-1.51437	1.62456	0.104257	0.359125	no
Glyma01g15630	Glyma01g15630	Glyma01g15630	Gm01:19254139-19255483	14-13-0	14-13-14	OK	0.619637	0.323104	-0.939424	0.757658	0.448656	0.777034	no
Glyma01g15687	Glyma01g15687	Glyma01g15687	Gm01:19474756-19475786	14-13-0	14-13-14	NOTEST	0	0	0	0	1	1	no
Glyma01g15744	Glyma01g15744	Glyma01g15744	Gm01:19561924-19565934	14-13-0	14-13-14	NOTEST	0	0	0	0	1	1	no
Glyma01g15802	Glyma01g15802	Glyma01g15802	Gm01:19569955-19570642	14-13-0	14-13-14	NOTEST	0	0	0	0	1	1	no
Glyma01g15860	Glyma01g15860	Glyma01g15860	Gm01:19642510-19643505	14-13-0	14-13-14	NOTEST	0	0.153258	1.79769e+308	1.79769e+308	0.117179	1	no
Glyma01g15883	Glyma01g15883	Glyma01g15883	Gm01:19661251-19662687	14-13-0	14-13-14	NOTEST	0	0	0	0	1	1	no
Glyma01g15906	Glyma01g15906	Glyma01g15906	Gm01:19730841-19731653	14-13-0	14-13-14	NOTEST	0	0	0	0	1	1	no
Glyma01g15930	Glyma01g15930	Glyma01g15930	Gm01:19793857-19799930	14-13-0	14-13-14	OK	55.6161	8.47871	-2.71359	3.13743	0.00170439	0.0247558	yes
Glyma01g16140	Glyma01g16140	Glyma01g16140	Gm01:20041371-20043743	14-13-0	14-13-14	NOTEST	0.133562	0.175497	0.393935	-0.277662	0.781272	1	no
Glyma01g16250	Glyma01g16250	Glyma01g16250	Gm01:20048200-20050535	14-13-0	14-13-14	NOTEST	0	0	0	0	1	1	no
Glyma01g16360	Glyma01g16360	Glyma01g16360	Gm01:20233418-20235447	14-13-0	14-13-14	OK	1.71134	1.11262	-0.621162	0.564505	0.57241	0.853252	no
Glyma01g16370	Glyma01g16370	Glyma01g16370	Gm01:20243646-20255339	14-13-0	14-13-14	OK	8.62221	3.88576	-1.14986	1.35598	0.175106	0.488141	no
Glyma01g16375	Glyma01g16375	Glyma01g16375	Gm01:20243646-20255339	14-13-0	14-13-14	OK	1.5438	1.36282	-0.17989	0.0153125	0.987783	0.997806	no
Glyma01g16380	Glyma01g16380	Glyma01g16380	Gm01:20340974-20356558	14-13-0	14-13-14	OK	42.1195	11.8774	-1.82627	2.19455	0.0281958	0.168354	no
Glyma01g16526	Glyma01g16526	Glyma01g16526	Gm01:20473820-20507463	14-13-0	14-13-14	OK	6.00359	4.63905	-0.371996	0.406947	0.684047	0.906573	no
Glyma01g16673	Glyma01g16673	Glyma01g16673	Gm01:20473820-20507463	14-13-0	14-13-14	NOTEST	0.119489	0.38514	1.6885	-0.470762	0.637811	1	no
Glyma01g16820	Glyma01g16820	Glyma01g16820	Gm01:20713503-20720624	14-13-0	14-13-14	OK	8.05858	4.00284	-1.0095	1.38066	0.167384	0.475125	no
Glyma01g17030	Glyma01g17030	Glyma01g17030	Gm01:21011809-21014457	14-13-0	14-13-14	OK	0.233446	0.653234	1.48451	-1.0767	0.281614	0.62614	no
Glyma01g17230	Glyma01g17230	Glyma01g17230	Gm01:21161585-21162372	14-13-0	14-13-14	OK	14.9383	8.10845	-0.88152	1.13696	0.255556	0.59379	no
Glyma01g17240	Glyma01g17240	Glyma01g17240	Gm01:21232889-21235373	14-13-0	14-13-14	OK	2.09472	1.42401	-0.556792	0.550548	0.581943	0.858591	no
Glyma01g17271	Glyma01g17271	Glyma01g17271	Gm01:21300956-21302664	14-13-0	14-13-14	NOTEST	0	0	0	0	1	1	no
Glyma01g17300	Glyma01g17300	Glyma01g17300	Gm01:21447376-21448520	14-13-0	14-13-14	OK	38.8182	2.1439	-4.17842	4.71407	2.42814e-06	0.000151131	yes
Glyma01g17330	Glyma01g17330	Glyma01g17330	Gm01:21487778-21490647	14-13-0	14-13-14	NOTEST	0	0	0	0	1	1	no
Glyma01g17350	Glyma01g17350	Glyma01g17350	Gm01:21601999-21604652	14-13-0	14-13-14	OK	4.24759	2.65454	-0.678183	0.904416	0.365775	0.709704	no
Glyma01g17426	Glyma01g17426	Glyma01g17426	Gm01:21677182-21677611	14-13-0	14-13-14	NOTEST	0	0	0	0	1	1	no
Glyma01g17503	Glyma01g17503	Glyma01g17503	Gm01:21677719-21680521	14-13-0	14-13-14	NOTEST	0	0	0	0	1	1	no
Glyma01g17580	Glyma01g17580	Glyma01g17580	Gm01:21886080-21888825	14-13-0	14-13-14	NOTEST	0	0.10491	1.79769e+308	1.79769e+308	0.0915339	1	no
Glyma01g17590	Glyma01g17590	Glyma01g17590	Gm01:21937384-21937864	14-13-0	14-13-14	NOTEST	0	0	0	0	1	1	no
Glyma01g17820	Glyma01g17820	Glyma01g17820	Gm01:22078170-22079110	14-13-0	14-13-14	OK	40.021	35.8589	-0.158426	0.215882	0.82908	0.960296	no
Glyma01g17850	Glyma01g17850	Glyma01g17850	Gm01:22130113-22137111	14-13-0	14-13-14	OK	93.6309	8.05129	-3.53969	3.30963	0.000934181	0.0155275	yes
Glyma01g17870	Glyma01g17870	Glyma01g17870	Gm01:22202473-22210341	14-13-0	14-13-14	OK	18.9232	8.27619	-1.19312	1.43275	0.15193	0.449731	no
Glyma01g17880	Glyma01g17880	Glyma01g17880	Gm01:22222121-22222938	14-13-0	14-13-14	NOTEST	0	0	0	0	1	1	no
Glyma01g18040	Glyma01g18040	Glyma01g18040	Gm01:22484144-22487576	14-13-0	14-13-14	OK	10.5873	6.31312	-0.745906	0.995437	0.319524	0.666494	no
Glyma01g18200	Glyma01g18200	Glyma01g18200	Gm01:22687069-22688346	14-13-0	14-13-14	OK	7.91953	4.37371	-0.856559	0.59697	0.550528	0.84054	no
Glyma01g18360	Glyma01g18360	Glyma01g18360	Gm01:22689358-22689601	14-13-0	14-13-14	OK	0	1.07723	1.79769e+308	1.79769e+308	0.200203	0.523344	no
Glyma01g18520	Glyma01g18520	Glyma01g18520	Gm01:22790155-22793135	14-13-0	14-13-14	NOTEST	0	0	0	0	1	1	no
Glyma01g18606	Glyma01g18606	Glyma01g18606	Gm01:23174174-23175344	14-13-0	14-13-14	NOTEST	0	0.11932	1.79769e+308	1.79769e+308	0.0780415	1	no
Glyma01g18693	Glyma01g18693	Glyma01g18693	Gm01:23245420-23247113	14-13-0	14-13-14	NOTEST	0	0	0	0	1	1	no
Glyma01g18780	Glyma01g18780	Glyma01g18780	Gm01:23303293-23306986	14-13-0	14-13-14	OK	29.2281	12.3472	-1.24317	1.66163	0.096588	0.342974	no
Glyma01g18885	Glyma01g18885	Glyma01g18885	Gm01:23422050-23424265	14-13-0	14-13-14	NOTEST	0	0	0	0	1	1	no
Glyma01g18990	Glyma01g18990	Glyma01g18990	Gm01:23424891-23425203	14-13-0	14-13-14	NOTEST	0	0	0	0	1	1	no
Glyma01g19200	Glyma01g19200	Glyma01g19200	Gm01:23586981-23590259	14-13-0	14-13-14	OK	8.47687	5.55653	-0.609348	0.739492	0.459608	0.784171	no
Glyma01g19420	Glyma01g19420	Glyma01g19420	Gm01:23910735-23912214	14-13-0	14-13-14	OK	29.7795	3.90187	-2.93208	3.67171	0.000240936	0.00557478	yes
Glyma01g19820	Glyma01g19820	Glyma01g19820	Gm01:24220923-24227067	14-13-0	14-13-14	OK	1.67545	1.27668	-0.392149	0.412082	0.680279	0.904913	no
Glyma01g20030	Glyma01g20030	Glyma01g20030	Gm01:24388541-24405141	14-13-0	14-13-14	OK	13.2028	7.7767	-0.763613	0.729417	0.465747	0.788392	no
Glyma01g20130	Glyma01g20130	Glyma01g20130	Gm01:24561667-24562473	14-13-0	14-13-14	NOTEST	0	0	0	0	1	1	no
Glyma01g20230	Glyma01g20230	Glyma01g20230	Gm01:24590327-24594299	14-13-0	14-13-14	OK	3.06776	5.82795	0.925802	-1.03096	0.30256	0.649097	no
Glyma01g20306	Glyma01g20306	Glyma01g20306	Gm01:24680832-24681420	14-13-0	14-13-14	NOTEST	0	0	0	0	1	1	no
Glyma01g20383	Glyma01g20383	Glyma01g20383	Gm01:24850234-24853077	14-13-0	14-13-14	OK	10.0477	3.96196	-1.34258	1.72581	0.0843825	0.316584	no
Glyma01g20460	Glyma01g20460	Glyma01g20460	Gm01:24945683-24950931	14-13-0	14-13-14	OK	27.7343	71.5921	1.36813	-1.35318	0.175998	0.489305	no
Glyma01g20565	Glyma01g20565	Glyma01g20565	Gm01:25139086-25141476	14-13-0	14-13-14	NOTEST	0	0	0	0	1	1	no
Glyma01g20670	Glyma01g20670	Glyma01g20670	Gm01:25147643-25157143	14-13-0	14-13-14	OK	23.6623	23.709	0.00284437	-0.00368467	0.99706	0.999702	no
Glyma01g20700	Glyma01g20700	Glyma01g20700	Gm01:25222324-25227920	14-13-0	14-13-14	OK	23.2718	32.522	0.48283	-0.565952	0.571426	0.852719	no
Glyma01g20710	Glyma01g20710	Glyma01g20710	Gm01:25241778-25246814	14-13-0	14-13-14	NOTEST	0.0655378	0.132977	1.02078	-0.74358	0.457131	1	no
Glyma01g20720	Glyma01g20720	Glyma01g20720	Gm01:25343080-25358309	14-13-0	14-13-14	OK	2.33624	3.79386	0.699479	-0.893519	0.371579	0.71433	no
Glyma01g20740	Glyma01g20740	Glyma01g20740	Gm01:25402501-25405946	14-13-0	14-13-14	OK	0.813841	0.278264	-1.54829	1.32816	0.184124	0.500934	no
Glyma01g20751	Glyma01g20751	Glyma01g20751	Gm01:25409531-25409921	14-13-0	14-13-14	NOTEST	0	0	0	0	1	1	no
Glyma01g20760	Glyma01g20760	Glyma01g20760	Gm01:25500530-25509163	14-13-0	14-13-14	OK	23.0919	15.9375	-0.534959	0.640536	0.521824	0.822273	no
Glyma01g20775	Glyma01g20775	Glyma01g20775	Gm01:25559739-25563228	14-13-0	14-13-14	OK	18.1858	18.7398	0.0432956	-0.0544183	0.956602	0.992176	no
Glyma01g20790	Glyma01g20790	Glyma01g20790	Gm01:25566713-25569152	14-13-0	14-13-14	OK	0.214315	1.54251	2.84748	-2.21498	0.0267616	0.163079	no
Glyma01g20800	Glyma01g20800	Glyma01g20800	Gm01:25569808-25571509	14-13-0	14-13-14	NOTEST	0	0.38639	1.79769e+308	1.79769e+308	0.0610048	1	no
Glyma01g20811	Glyma01g20811	Glyma01g20811	Gm01:25640214-25651295	14-13-0	14-13-14	OK	5.20622	5.05139	-0.0435569	0.05774	0.953956	0.991767	no
Glyma01g20820	Glyma01g20820	Glyma01g20820	Gm01:25640214-25651295	14-13-0	14-13-14	LOWDATA	0	0	-0.0435569	0	1	1	no
Glyma01g20860	Glyma01g20860	Glyma01g20860	Gm01:25711548-25714121	14-13-0	14-13-14	OK	47.617	21.2391	-1.16475	1.35261	0.17618	0.489521	no
Glyma01g20870	Glyma01g20870	Glyma01g20870	Gm01:25714752-25716813	14-13-0	14-13-14	OK	0.189967	0.829619	2.1267	-1.71163	0.0869648	0.322352	no
Glyma01g20885	Glyma01g20885	Glyma01g20885	Gm01:25783765-25787946	14-13-0	14-13-14	NOTEST	0	0	0	0	1	1	no
Glyma01g20900	Glyma01g20900	Glyma01g20900	Gm01:25807514-25813526	14-13-0	14-13-14	NOTEST	0	0	0	0	1	1	no
Glyma01g20910	Glyma01g20910	Glyma01g20910	Gm01:25867401-25867807	14-13-0	14-13-14	NOTEST	0	0	0	0	1	1	no
Glyma01g20920	Glyma01g20920	Glyma01g20920	Gm01:25867821-25870459	14-13-0	14-13-14	OK	2.36781	2.70249	0.190736	-0.174441	0.861519	0.96911	no
Glyma01g20935	Glyma01g20935	Glyma01g20935	Gm01:25874290-25875066	14-13-0	14-13-14	OK	0.45175	0	-1.79769e+308	-1.79769e+308	0.0794037	0.303716	no
Glyma01g20950	Glyma01g20950	Glyma01g20950	Gm01:26043470-26048530	14-13-0	14-13-14	OK	2.26122	0.109346	-4.37013	3.97508	7.03561e-05	0.00212542	yes
Glyma01g20970	Glyma01g20970	Glyma01g20970	Gm01:26111521-26112660	14-13-0	14-13-14	NOTEST	0	0	0	0	1	1	no
Glyma01g20980	Glyma01g20980	Glyma01g20980	Gm01:26203747-26206343	14-13-0	14-13-14	NOTEST	0	0	0	0	1	1	no
Glyma01g20986	Glyma01g20986	Glyma01g20986	Gm01:26214735-26217244	14-13-0	14-13-14	NOTEST	0	0	0	0	1	1	no
Glyma01g20993	Glyma01g20993	Glyma01g20993	Gm01:26218166-26218983	14-13-0	14-13-14	NOTEST	0	0	0	0	1	1	no
Glyma01g21000	Glyma01g21000	Glyma01g21000	Gm01:26227617-26228265	14-13-0	14-13-14	NOTEST	0	0	0	0	1	1	no
Glyma01g21120	Glyma01g21120	Glyma01g21120	Gm01:26230555-26237293	14-13-0	14-13-14	NOTEST	0	0	0	0	1	1	no
Glyma01g21241	Glyma01g21241	Glyma01g21241	Gm01:26358875-26362351	14-13-0	14-13-14	NOTEST	0	0	0	0	1	1	no
Glyma01g21360	Glyma01g21360	Glyma01g21360	Gm01:26380864-26392487	14-13-0	14-13-14	OK	3.22837	4.23411	0.39125	-0.430645	0.666727	0.898665	no
Glyma01g21480	Glyma01g21480	Glyma01g21480	Gm01:26542098-26544485	14-13-0	14-13-14	OK	1.37612	4.76038	1.79047	-2.18879	0.0286124	0.169711	no
Glyma01g21500	Glyma01g21500	Glyma01g21500	Gm01:26596018-26599902	14-13-0	14-13-14	OK	49.774	9.97411	-2.31913	3.03128	0.00243516	0.0321846	yes
Glyma01g21510	Glyma01g21510	Glyma01g21510	Gm01:26672645-26677024	14-13-0	14-13-14	OK	3.20499	0.14688	-4.44761	3.05362	0.00226096	0.0309391	yes
Glyma01g21521	Glyma01g21521	Glyma01g21521	Gm01:26725662-26726466	14-13-0	14-13-14	NOTEST	0	0	0	0	1	1	no
Glyma01g21530	Glyma01g21530	Glyma01g21530	Gm01:26737266-26739888	14-13-0	14-13-14	NOTEST	0.0950833	0.269306	1.50198	-0.788051	0.430667	1	no
Glyma01g21540	Glyma01g21540	Glyma01g21540	Gm01:26740703-26749646	14-13-0	14-13-14	NOTEST	0	0.257737	1.79769e+308	1.79769e+308	0.0878604	1	no
Glyma01g21570	Glyma01g21570	Glyma01g21570	Gm01:26771286-26773122	14-13-0	14-13-14	NOTEST	0	0	0	0	1	1	no
Glyma01g21575	Glyma01g21575	Glyma01g21575	Gm01:26798193-26799005	14-13-0	14-13-14	NOTEST	0	0	0	0	1	1	no
Glyma01g21580	Glyma01g21580	Glyma01g21580	Gm01:26814403-26817180	14-13-0	14-13-14	NOTEST	0.0540707	0	-1.79769e+308	-1.79769e+308	0.122021	1	no
Glyma01g21590	Glyma01g21590	Glyma01g21590	Gm01:26883578-26885952	14-13-0	14-13-14	NOTEST	0	0	0	0	1	1	no
Glyma01g21620	Glyma01g21620	Glyma01g21620	Gm01:26918441-26921225	14-13-0	14-13-14	NOTEST	0.33744	0.405466	0.264948	-0.22323	0.823357	1	no
Glyma01g21630	Glyma01g21630	Glyma01g21630	Gm01:26936772-26938129	14-13-0	14-13-14	NOTEST	0	0	0	0	1	1	no
Glyma01g21660	Glyma01g21660	Glyma01g21660	Gm01:27033743-27042354	14-13-0	14-13-14	OK	1.22275	1.38087	0.175448	-0.17657	0.859846	0.968959	no
Glyma01g21680	Glyma01g21680	Glyma01g21680	Gm01:27082459-27084583	14-13-0	14-13-14	OK	5.04099	4.14749	-0.281468	0.344513	0.73046	0.925368	no
Glyma01g21707	Glyma01g21707	Glyma01g21707	Gm01:27099239-27134127	14-13-0	14-13-14	OK	3.21404	2.59717	-0.307449	0.351813	0.724979	0.923095	no
Glyma01g21734	Glyma01g21734	Glyma01g21734	Gm01:27099239-27134127	14-13-0	14-13-14	OK	0.402873	0.608084	0.593946	-0.327557	0.743246	0.930909	no
Glyma01g21762	Glyma01g21762	Glyma01g21762	Gm01:27142763-27149757	14-13-0	14-13-14	NOTEST	0	0	0	0	1	1	no
Glyma01g21790	Glyma01g21790	Glyma01g21790	Gm01:27193609-27195324	14-13-0	14-13-14	NOTEST	0	0	0	0	1	1	no
Glyma01g21831	Glyma01g21831	Glyma01g21831	Gm01:27209475-27244035	14-13-0	14-13-14	OK	0.346156	0.800393	1.20929	-0.779529	0.435668	0.766331	no
Glyma01g21870	Glyma01g21870	Glyma01g21870	Gm01:27283470-27283944	14-13-0	14-13-14	NOTEST	0	0	0	0	1	1	no
Glyma01g21900	Glyma01g21900	Glyma01g21900	Gm01:27377288-27379936	14-13-0	14-13-14	OK	3.38409	0.880774	-1.94192	2.0674	0.0386969	0.200015	no
Glyma01g22120	Glyma01g22120	Glyma01g22120	Gm01:27653934-27655968	14-13-0	14-13-14	NOTEST	0	0	0	0	1	1	no
Glyma01g22131	Glyma01g22131	Glyma01g22131	Gm01:27671430-27681519	14-13-0	14-13-14	NOTEST	0	0	0	0	1	1	no
Glyma01g22140	Glyma01g22140	Glyma01g22140	Gm01:27681952-27683220	14-13-0	14-13-14	NOTEST	0	0	0	0	1	1	no
Glyma01g22160	Glyma01g22160	Glyma01g22160	Gm01:27743827-27745117	14-13-0	14-13-14	OK	2.38321	2.0893	-0.189884	0.191814	0.847888	0.965749	no
Glyma01g22170	Glyma01g22170	Glyma01g22170	Gm01:27746481-27751766	14-13-0	14-13-14	OK	24.388	10.266	-1.2483	1.69652	0.0897871	0.327993	no
Glyma01g22180	Glyma01g22180	Glyma01g22180	Gm01:27781683-27784987	14-13-0	14-13-14	OK	16.7415	4.44282	-1.91388	2.3284	0.0198911	0.136562	no
Glyma01g22195	Glyma01g22195	Glyma01g22195	Gm01:27825362-27840530	14-13-0	14-13-14	NOTEST	0	0.0211424	1.79769e+308	1.79769e+308	0.386415	1	no
Glyma01g22210	Glyma01g22210	Glyma01g22210	Gm01:27825362-27840530	14-13-0	14-13-14	OK	2.57731	2.22694	-0.210804	0.1972	0.843671	0.964852	no
Glyma01g22260	Glyma01g22260	Glyma01g22260	Gm01:27963645-27965402	14-13-0	14-13-14	OK	2.71955	13.9378	2.35756	-3.0317	0.00243184	0.0321656	yes
Glyma01g22333	Glyma01g22333	Glyma01g22333	Gm01:28079064-28083033	14-13-0	14-13-14	OK	0.841152	0.353942	-1.24885	0.952744	0.34072	0.688209	no
Glyma01g22406	Glyma01g22406	Glyma01g22406	Gm01:28104831-28117466	14-13-0	14-13-14	OK	7.31635	7.07884	-0.0476105	0.0655727	0.947718	0.99104	no
Glyma01g22480	Glyma01g22480	Glyma01g22480	Gm01:28151173-28153211	14-13-0	14-13-14	OK	5.64412	10.771	0.932325	-1.28596	0.198455	0.523305	no
Glyma01g22490	Glyma01g22490	Glyma01g22490	Gm01:28188535-28194784	14-13-0	14-13-14	OK	27.382	3.37557	-3.02003	3.77292	0.000161351	0.00407519	yes
Glyma01g22501	Glyma01g22501	Glyma01g22501	Gm01:28205872-28206502	14-13-0	14-13-14	NOTEST	0	0	0	0	1	1	no
Glyma01g22510	Glyma01g22510	Glyma01g22510	Gm01:28236453-28241841	14-13-0	14-13-14	OK	1.48697	4.44867	1.581	-1.8188	0.0689418	0.279894	no
Glyma01g22530	Glyma01g22530	Glyma01g22530	Gm01:28336960-28340913	14-13-0	14-13-14	OK	0.265775	0.726263	1.45028	-1.08287	0.278864	0.622612	no
Glyma01g22542	Glyma01g22542	Glyma01g22542	Gm01:28390587-28392968	14-13-0	14-13-14	OK	0.478369	3.11259	2.70192	-2.21763	0.0265804	0.162624	no
Glyma01g22554	Glyma01g22554	Glyma01g22554	Gm01:28393068-28396339	14-13-0	14-13-14	OK	0.473311	3.04994	2.68792	-2.66392	0.00772363	0.0723689	no
Glyma01g22567	Glyma01g22567	Glyma01g22567	Gm01:28416197-28418758	14-13-0	14-13-14	NOTEST	0	0	0	0	1	1	no
Glyma01g22580	Glyma01g22580	Glyma01g22580	Gm01:28513351-28526497	14-13-0	14-13-14	OK	2.66741	2.08143	-0.357864	0.376392	0.706626	0.916103	no
Glyma01g22600	Glyma01g22600	Glyma01g22600	Gm01:28536103-28539838	14-13-0	14-13-14	OK	22.4091	16.4284	-0.44789	0.542582	0.587417	0.861592	no
Glyma01g22610	Glyma01g22610	Glyma01g22610	Gm01:28541141-28542499	14-13-0	14-13-14	NOTEST	0.337306	0.0879735	-1.93892	1.27341	0.202874	1	no
Glyma01g22620	Glyma01g22620	Glyma01g22620	Gm01:28543689-28553173	14-13-0	14-13-14	OK	150.963	29.8812	-2.33689	1.85567	0.0634999	0.266312	no
Glyma01g22630	Glyma01g22630	Glyma01g22630	Gm01:28591482-28597660	14-13-0	14-13-14	OK	5.02179	3.66627	-0.453888	0.567937	0.570078	0.852492	no
Glyma01g22641	Glyma01g22641	Glyma01g22641	Gm01:28636476-28637827	14-13-0	14-13-14	OK	1.26587	2.33904	0.88579	-0.86233	0.388506	0.728644	no
Glyma01g22650	Glyma01g22650	Glyma01g22650	Gm01:28639438-28642822	14-13-0	14-13-14	NOTEST	0	0	0	0	1	1	no
Glyma01g22670	Glyma01g22670	Glyma01g22670	Gm01:28699702-28704423	14-13-0	14-13-14	NOTEST	0.0555035	0	-1.79769e+308	-1.79769e+308	0.122021	1	no
Glyma01g22680	Glyma01g22680	Glyma01g22680	Gm01:28708173-28714632	14-13-0	14-13-14	OK	22.4667	20.0257	-0.165938	0.179244	0.857746	0.968552	no
Glyma01g22710	Glyma01g22710	Glyma01g22710	Gm01:28768432-28773021	14-13-0	14-13-14	OK	1.66795	1.56949	-0.0877771	0.110136	0.912302	0.98239	no
Glyma01g22720	Glyma01g22720	Glyma01g22720	Gm01:28773705-28774862	14-13-0	14-13-14	NOTEST	0.138489	0	-1.79769e+308	-1.79769e+308	0.122021	1	no
Glyma01g22730	Glyma01g22730	Glyma01g22730	Gm01:28777549-28780388	14-13-0	14-13-14	NOTEST	0	0.064051	1.79769e+308	1.79769e+308	0.141528	1	no
Glyma01g22751	Glyma01g22751	Glyma01g22751	Gm01:28847126-28848359	14-13-0	14-13-14	NOTEST	0	0.115902	1.79769e+308	1.79769e+308	0.0878604	1	no
Glyma01g22770	Glyma01g22770	Glyma01g22770	Gm01:28902721-28902950	14-13-0	14-13-14	NOTEST	0	0	0	0	1	1	no
Glyma01g22800	Glyma01g22800	Glyma01g22800	Gm01:28928281-28929701	14-13-0	14-13-14	NOTEST	0.123288	0.067279	-0.873799	0.608985	0.542534	1	no
Glyma01g22830	Glyma01g22830	Glyma01g22830	Gm01:28986402-28988037	14-13-0	14-13-14	OK	0.288156	2.95271	3.35712	-2.81491	0.00487902	0.052852	no
Glyma01g22840	Glyma01g22840	Glyma01g22840	Gm01:28991061-29005174	14-13-0	14-13-14	NOTEST	0.0403777	0.0209568	-0.946139	0.461987	0.644091	1	no
Glyma01g22850	Glyma01g22850	Glyma01g22850	Gm01:29076299-29082231	14-13-0	14-13-14	NOTEST	0.0520883	0.0133969	-1.95906	0.980541	0.326819	1	no
Glyma01g22861	Glyma01g22861	Glyma01g22861	Gm01:29092183-29093676	14-13-0	14-13-14	NOTEST	0	0	0	0	1	1	no
Glyma01g22871	Glyma01g22871	Glyma01g22871	Gm01:29147726-29148607	14-13-0	14-13-14	OK	5.11707	0	-1.79769e+308	-1.79769e+308	0.0224092	0.146585	no
Glyma01g22880	Glyma01g22880	Glyma01g22880	Gm01:29149880-29152191	14-13-0	14-13-14	NOTEST	0.12741	0.396486	1.63779	-1.29525	0.195235	1	no
Glyma01g22910	Glyma01g22910	Glyma01g22910	Gm01:29193663-29195557	14-13-0	14-13-14	NOTEST	0	0	0	0	1	1	no
Glyma01g22927	Glyma01g22927	Glyma01g22927	Gm01:29230774-29239997	14-13-0	14-13-14	NOTEST	0	0	0	0	1	1	no
Glyma01g22944	Glyma01g22944	Glyma01g22944	Gm01:29270621-29273823	14-13-0	14-13-14	NOTEST	0	0	0	0	1	1	no
Glyma01g22962	Glyma01g22962	Glyma01g22962	Gm01:29296975-29300243	14-13-0	14-13-14	NOTEST	0	0	0	0	1	1	no
Glyma01g22980	Glyma01g22980	Glyma01g22980	Gm01:29388012-29389406	14-13-0	14-13-14	NOTEST	0	0	0	0	1	1	no
Glyma01g22990	Glyma01g22990	Glyma01g22990	Gm01:29393119-29399932	14-13-0	14-13-14	NOTEST	0.113772	0.0446246	-1.35024	0.998904	0.317841	1	no
Glyma01g23015	Glyma01g23015	Glyma01g23015	Gm01:29421939-29425642	14-13-0	14-13-14	OK	1.776	1.95204	0.13635	-0.094477	0.92473	0.986144	no
Glyma01g23040	Glyma01g23040	Glyma01g23040	Gm01:29470009-29471440	14-13-0	14-13-14	OK	3.39236	6.82105	1.00771	-1.24894	0.211688	0.538328	no
Glyma01g23056	Glyma01g23056	Glyma01g23056	Gm01:29471833-29483149	14-13-0	14-13-14	OK	3.98285	4.54734	0.191223	-0.240943	0.8096	0.953132	no
Glyma01g23072	Glyma01g23072	Glyma01g23072	Gm01:29511789-29512084	14-13-0	14-13-14	NOTEST	0	0	0	0	1	1	no
Glyma01g23089	Glyma01g23089	Glyma01g23089	Gm01:29533330-29533964	14-13-0	14-13-14	NOTEST	0	0	0	0	1	1	no
Glyma01g23106	Glyma01g23106	Glyma01g23106	Gm01:29535512-29536834	14-13-0	14-13-14	NOTEST	0	0	0	0	1	1	no
Glyma01g23123	Glyma01g23123	Glyma01g23123	Gm01:29537254-29537802	14-13-0	14-13-14	NOTEST	0	0	0	0	1	1	no
Glyma01g23140	Glyma01g23140	Glyma01g23140	Gm01:29565892-29574413	14-13-0	14-13-14	OK	0.349113	0.767953	1.13732	-1.16698	0.243217	0.578799	no
Glyma01g23150	Glyma01g23150	Glyma01g23150	Gm01:29660957-29665158	14-13-0	14-13-14	OK	4.9313	2.96614	-0.733379	0.979828	0.327171	0.673816	no
Glyma01g23180	Glyma01g23180	Glyma01g23180	Gm01:29699064-29704324	14-13-0	14-13-14	OK	2.75224	1.87457	-0.55405	0.708662	0.478534	0.795791	no
Glyma01g23196	Glyma01g23196	Glyma01g23196	Gm01:29809758-29827788	14-13-0	14-13-14	OK	6.82923	3.22705	-1.08151	0.810387	0.417718	0.752065	no
Glyma01g23213	Glyma01g23213	Glyma01g23213	Gm01:29809758-29827788	14-13-0	14-13-14	OK	6.99204	3.72683	-0.907762	1.0296	0.303196	0.649738	no
Glyma01g23230	Glyma01g23230	Glyma01g23230	Gm01:29843906-29847664	14-13-0	14-13-14	OK	5.32632	6.05936	0.186026	-0.255779	0.798122	0.950332	no
Glyma01g23250	Glyma01g23250	Glyma01g23250	Gm01:29855703-29857266	14-13-0	14-13-14	NOTEST	0	0	0	0	1	1	no
Glyma01g23300	Glyma01g23300	Glyma01g23300	Gm01:29947728-29948872	14-13-0	14-13-14	NOTEST	0	0	0	0	1	1	no
Glyma01g23342	Glyma01g23342	Glyma01g23342	Gm01:29989093-29991297	14-13-0	14-13-14	NOTEST	0	0	0	0	1	1	no
Glyma01g23384	Glyma01g23384	Glyma01g23384	Gm01:30079377-30079787	14-13-0	14-13-14	OK	0	0.634757	1.79769e+308	1.79769e+308	0.117179	0.385755	no
Glyma01g23427	Glyma01g23427	Glyma01g23427	Gm01:30083471-30150322	14-13-0	14-13-14	OK	2.38211	1.8939	-0.330881	0.428186	0.668515	0.899367	no
Glyma01g23470	Glyma01g23470	Glyma01g23470	Gm01:30208373-30208835	14-13-0	14-13-14	NOTEST	0	0	0	0	1	1	no
Glyma01g23534	Glyma01g23534	Glyma01g23534	Gm01:30275109-30281645	14-13-0	14-13-14	NOTEST	0	0	0	0	1	1	no
Glyma01g23598	Glyma01g23598	Glyma01g23598	Gm01:30314496-30324821	14-13-0	14-13-14	OK	11.8388	6.84691	-0.79	0.942656	0.345857	0.691849	no
Glyma01g23662	Glyma01g23662	Glyma01g23662	Gm01:30575165-30577235	14-13-0	14-13-14	NOTEST	0	0	0	0	1	1	no
Glyma01g23726	Glyma01g23726	Glyma01g23726	Gm01:30704826-30710568	14-13-0	14-13-14	OK	7.71132	6.42694	-0.262844	0.364309	0.715628	0.919128	no
Glyma01g23790	Glyma01g23790	Glyma01g23790	Gm01:30725259-30734274	14-13-0	14-13-14	NOTEST	0	0	0	0	1	1	no
Glyma01g23820	Glyma01g23820	Glyma01g23820	Gm01:30803138-30810796	14-13-0	14-13-14	OK	4.36931	3.00242	-0.541279	0.56326	0.573258	0.853731	no
Glyma01g23830	Glyma01g23830	Glyma01g23830	Gm01:30834278-30837915	14-13-0	14-13-14	OK	5.90588	5.59909	-0.0769601	0.102988	0.917972	0.983736	no
Glyma01g23840	Glyma01g23840	Glyma01g23840	Gm01:30921784-30923363	14-13-0	14-13-14	NOTEST	0	0	0	0	1	1	no
Glyma01g23870	Glyma01g23870	Glyma01g23870	Gm01:31003666-31006666	14-13-0	14-13-14	OK	21.5488	9.58243	-1.16914	1.45277	0.146288	0.439124	no
Glyma01g24100	Glyma01g24100	Glyma01g24100	Gm01:31272679-31276347	14-13-0	14-13-14	OK	100.709	42.9692	-1.22882	1.46837	0.142004	0.431549	no
Glyma01g24115	Glyma01g24115	Glyma01g24115	Gm01:31363012-31365202	14-13-0	14-13-14	NOTEST	0	0	0	0	1	1	no
Glyma01g24130	Glyma01g24130	Glyma01g24130	Gm01:31382751-31384508	14-13-0	14-13-14	NOTEST	0	0	0	0	1	1	no
Glyma01g24136	Glyma01g24136	Glyma01g24136	Gm01:31384592-31388267	14-13-0	14-13-14	NOTEST	0	0	0	0	1	1	no
Glyma01g24143	Glyma01g24143	Glyma01g24143	Gm01:31403714-31405886	14-13-0	14-13-14	NOTEST	0	0	0	0	1	1	no
Glyma01g24150	Glyma01g24150	Glyma01g24150	Gm01:31406290-31410211	14-13-0	14-13-14	OK	1.07722	3.02413	1.4892	-1.28234	0.199724	0.523344	no
Glyma01g24160	Glyma01g24160	Glyma01g24160	Gm01:31442860-31443621	14-13-0	14-13-14	NOTEST	0.145954	0.146918	0.00949367	-0.0054762	0.995631	1	no
Glyma01g24360	Glyma01g24360	Glyma01g24360	Gm01:31583729-31587255	14-13-0	14-13-14	OK	21.7328	29.2714	0.429612	-0.56258	0.573721	0.854156	no
Glyma01g24383	Glyma01g24383	Glyma01g24383	Gm01:31655035-31655556	14-13-0	14-13-14	NOTEST	0	0	0	0	1	1	no
Glyma01g24406	Glyma01g24406	Glyma01g24406	Gm01:31704492-31706592	14-13-0	14-13-14	OK	0	0.772583	1.79769e+308	1.79769e+308	0.0654322	0.27134	no
Glyma01g24430	Glyma01g24430	Glyma01g24430	Gm01:31720084-31726752	14-13-0	14-13-14	OK	2.75277	3.55753	0.369991	-0.429926	0.66725	0.898977	no
Glyma01g24455	Glyma01g24455	Glyma01g24455	Gm01:31734753-31736467	14-13-0	14-13-14	OK	0.543206	0.201741	-1.42899	1.15312	0.248862	0.585907	no
Glyma01g24480	Glyma01g24480	Glyma01g24480	Gm01:31792540-31792932	14-13-0	14-13-14	OK	8.12145	2.43026	-1.74063	1.57832	0.114492	0.381225	no
Glyma01g24495	Glyma01g24495	Glyma01g24495	Gm01:31795450-31795885	14-13-0	14-13-14	OK	0	0.743283	1.79769e+308	1.79769e+308	0.0878604	0.323396	no
Glyma01g24510	Glyma01g24510	Glyma01g24510	Gm01:31818673-31828608	14-13-0	14-13-14	OK	3.43613	2.35957	-0.542258	0.708006	0.478941	0.796067	no
Glyma01g24515	Glyma01g24515	Glyma01g24515	Gm01:31889614-31891603	14-13-0	14-13-14	NOTEST	0	0	0	0	1	1	no
Glyma01g24520	Glyma01g24520	Glyma01g24520	Gm01:31911765-31920749	14-13-0	14-13-14	OK	4.63707	5.22001	0.170838	-0.17517	0.860946	0.968959	no
Glyma01g24530	Glyma01g24530	Glyma01g24530	Gm01:31964428-31977723	14-13-0	14-13-14	NOTEST	0.402685	0	-1.79769e+308	-1.79769e+308	0.0337251	1	no
Glyma01g24536	Glyma01g24536	Glyma01g24536	Gm01:31981604-31985794	14-13-0	14-13-14	NOTEST	0	0	0	0	1	1	no
Glyma01g24543	Glyma01g24543	Glyma01g24543	Gm01:32028704-32031074	14-13-0	14-13-14	OK	0	0.449144	1.79769e+308	1.79769e+308	0.070927	0.284293	no
Glyma01g24550	Glyma01g24550	Glyma01g24550	Gm01:32033425-32036205	14-13-0	14-13-14	OK	4.15423	5.78052	0.476617	-0.44287	0.65786	0.895434	no
Glyma01g24570	Glyma01g24570	Glyma01g24570	Gm01:32066869-32072424	14-13-0	14-13-14	OK	8.9255	6.27599	-0.508088	0.645203	0.518796	0.820168	no
Glyma01g24580	Glyma01g24580	Glyma01g24580	Gm01:32077414-32078744	14-13-0	14-13-14	NOTEST	0	0	0	0	1	1	no
Glyma01g24601	Glyma01g24601	Glyma01g24601	Gm01:32084232-32086938	14-13-0	14-13-14	OK	7.74932	5.04729	-0.618562	0.537137	0.591173	0.863692	no
Glyma01g24620	Glyma01g24620	Glyma01g24620	Gm01:32161499-32162094	14-13-0	14-13-14	NOTEST	0	0	0	0	1	1	no
Glyma01g24650	Glyma01g24650	Glyma01g24650	Gm01:32202535-32211787	14-13-0	14-13-14	OK	11.7815	9.50404	-0.309912	0.430531	0.666809	0.89867	no
Glyma01g24670	Glyma01g24670	Glyma01g24670	Gm01:32220914-32223882	14-13-0	14-13-14	OK	0.355124	0.915076	1.36557	-1.33061	0.183318	0.49946	no
Glyma01g24680	Glyma01g24680	Glyma01g24680	Gm01:32231085-32231557	14-13-0	14-13-14	NOTEST	0	0	0	0	1	1	no
Glyma01g24710	Glyma01g24710	Glyma01g24710	Gm01:32287633-32289710	14-13-0	14-13-14	NOTEST	0	0.226582	1.79769e+308	1.79769e+308	0.0442066	1	no
Glyma01g24715	Glyma01g24715	Glyma01g24715	Gm01:32301822-32302361	14-13-0	14-13-14	NOTEST	0	0	0	0	1	1	no
Glyma01g24720	Glyma01g24720	Glyma01g24720	Gm01:32308210-32311363	14-13-0	14-13-14	NOTEST	0	0	0	0	1	1	no
Glyma01g24735	Glyma01g24735	Glyma01g24735	Gm01:32401120-32402034	14-13-0	14-13-14	NOTEST	0	0	0	0	1	1	no
Glyma01g24750	Glyma01g24750	Glyma01g24750	Gm01:32402350-32403396	14-13-0	14-13-14	NOTEST	0	0	0	0	1	1	no
Glyma01g24771	Glyma01g24771	Glyma01g24771	Gm01:32417415-32418160	14-13-0	14-13-14	NOTEST	0	0	0	0	1	1	no
Glyma01g24790	Glyma01g24790	Glyma01g24790	Gm01:32422309-32422465	14-13-0	14-13-14	NOTEST	0	0	0	0	1	1	no
Glyma01g24801	Glyma01g24801	Glyma01g24801	Gm01:32490914-32491358	14-13-0	14-13-14	NOTEST	0	0	0	0	1	1	no
Glyma01g24811	Glyma01g24811	Glyma01g24811	Gm01:32561178-32561613	14-13-0	14-13-14	NOTEST	0	0	0	0	1	1	no
Glyma01g24820	Glyma01g24820	Glyma01g24820	Gm01:32606517-32608233	14-13-0	14-13-14	NOTEST	0	0	0	0	1	1	no
Glyma01g24835	Glyma01g24835	Glyma01g24835	Gm01:32612017-32613710	14-13-0	14-13-14	NOTEST	0	0	0	0	1	1	no
Glyma01g24850	Glyma01g24850	Glyma01g24850	Gm01:32687318-32692418	14-13-0	14-13-14	NOTEST	0	0	0	0	1	1	no
Glyma01g24870	Glyma01g24870	Glyma01g24870	Gm01:32782513-32787123	14-13-0	14-13-14	NOTEST	0.113914	0.109993	-0.050541	0.0373045	0.970242	1	no
Glyma01g24880	Glyma01g24880	Glyma01g24880	Gm01:32798562-32800071	14-13-0	14-13-14	OK	4.58458	0.596945	-2.94112	2.89311	0.00381449	0.044705	yes
Glyma01g24900	Glyma01g24900	Glyma01g24900	Gm01:32814004-32817943	14-13-0	14-13-14	OK	6.05952	8.78109	0.535196	-0.693651	0.487901	0.802235	no
Glyma01g24915	Glyma01g24915	Glyma01g24915	Gm01:32834808-32836555	14-13-0	14-13-14	NOTEST	0	0	0	0	1	1	no
Glyma01g24931	Glyma01g24931	Glyma01g24931	Gm01:32867175-32870537	14-13-0	14-13-14	OK	52.9157	29.1142	-0.861975	1.04488	0.296076	0.642052	no
Glyma01g24945	Glyma01g24945	Glyma01g24945	Gm01:32870727-32871773	14-13-0	14-13-14	OK	9.05432	11.9719	0.402978	-0.513192	0.607817	0.87216	no
Glyma01g24960	Glyma01g24960	Glyma01g24960	Gm01:32900893-32902163	14-13-0	14-13-14	NOTEST	0	0	0	0	1	1	no
Glyma01g24975	Glyma01g24975	Glyma01g24975	Gm01:33011689-33012355	14-13-0	14-13-14	NOTEST	0	0	0	0	1	1	no
Glyma01g24990	Glyma01g24990	Glyma01g24990	Gm01:33023697-33026836	14-13-0	14-13-14	NOTEST	0	0	0	0	1	1	no
Glyma01g25000	Glyma01g25000	Glyma01g25000	Gm01:33038313-33043683	14-13-0	14-13-14	NOTEST	0	0.142673	1.79769e+308	1.79769e+308	0.0934305	1	no
Glyma01g25010	Glyma01g25010	Glyma01g25010	Gm01:33122056-33128090	14-13-0	14-13-14	OK	1.4417	1.59596	0.146654	-0.146963	0.883161	0.975182	no
Glyma01g25040	Glyma01g25040	Glyma01g25040	Gm01:33159095-33163007	14-13-0	14-13-14	OK	6.61439	4.61412	-0.519553	0.706663	0.479776	0.796686	no
Glyma01g25116	Glyma01g25116	Glyma01g25116	Gm01:33175920-33176216	14-13-0	14-13-14	NOTEST	0	0	0	0	1	1	no
Glyma01g25193	Glyma01g25193	Glyma01g25193	Gm01:33176938-33177664	14-13-0	14-13-14	NOTEST	0	0	0	0	1	1	no
Glyma01g25270	Glyma01g25270	Glyma01g25270	Gm01:33300641-33305517	14-13-0	14-13-14	OK	10.7117	13.9846	0.38465	-0.444737	0.65651	0.894919	no
Glyma01g25690	Glyma01g25690	Glyma01g25690	Gm01:33714521-33724227	14-13-0	14-13-14	OK	4.82622	10.9497	1.18193	-1.61359	0.106617	0.364097	no
Glyma01g25710	Glyma01g25710	Glyma01g25710	Gm01:33743092-33750073	14-13-0	14-13-14	OK	1.05611	0.440976	-1.25998	1.23913	0.215296	0.54276	no
Glyma01g25734	Glyma01g25734	Glyma01g25734	Gm01:33873561-33877219	14-13-0	14-13-14	NOTEST	0	0	0	0	1	1	no
Glyma01g25758	Glyma01g25758	Glyma01g25758	Gm01:33877681-33878910	14-13-0	14-13-14	NOTEST	0	0	0	0	1	1	no
Glyma01g25782	Glyma01g25782	Glyma01g25782	Gm01:33892028-33896774	14-13-0	14-13-14	OK	0.0450096	0.448688	3.31741	-2.37302	0.0176433	0.126273	no
Glyma01g25806	Glyma01g25806	Glyma01g25806	Gm01:33911123-33912252	14-13-0	14-13-14	NOTEST	0	0	0	0	1	1	no
Glyma01g25830	Glyma01g25830	Glyma01g25830	Gm01:33967102-33969353	14-13-0	14-13-14	OK	26.757	16.7481	-0.675922	0.839451	0.401216	0.738851	no
Glyma01g25861	Glyma01g25861	Glyma01g25861	Gm01:33970039-33970770	14-13-0	14-13-14	NOTEST	0	0	0	0	1	1	no
Glyma01g25890	Glyma01g25890	Glyma01g25890	Gm01:34032831-34039400	14-13-0	14-13-14	OK	8.5934	0.971244	-3.14532	3.55805	0.000373624	0.00781351	yes
Glyma01g25903	Glyma01g25903	Glyma01g25903	Gm01:34110636-34112307	14-13-0	14-13-14	NOTEST	0	0.0946415	1.79769e+308	1.79769e+308	0.200203	1	no
Glyma01g25916	Glyma01g25916	Glyma01g25916	Gm01:34210140-34210872	14-13-0	14-13-14	NOTEST	0	0.0653311	1.79769e+308	1.79769e+308	0.200203	1	no
Glyma01g25930	Glyma01g25930	Glyma01g25930	Gm01:34244964-34245805	14-13-0	14-13-14	NOTEST	0	0.0729879	1.79769e+308	1.79769e+308	0.200203	1	no
Glyma01g25940	Glyma01g25940	Glyma01g25940	Gm01:34287073-34295334	14-13-0	14-13-14	OK	41.1251	23.2072	-0.825442	0.951363	0.34142	0.688861	no
Glyma01g25960	Glyma01g25960	Glyma01g25960	Gm01:34329634-34332496	14-13-0	14-13-14	NOTEST	0.104934	0.0535177	-0.971395	0.383289	0.701506	1	no
Glyma01g25980	Glyma01g25980	Glyma01g25980	Gm01:34344570-34345856	14-13-0	14-13-14	NOTEST	0	0	0	0	1	1	no
Glyma01g26010	Glyma01g26010	Glyma01g26010	Gm01:34353206-34357427	14-13-0	14-13-14	NOTEST	0	0	0	0	1	1	no
Glyma01g26220	Glyma01g26220	Glyma01g26220	Gm01:34484074-34486309	14-13-0	14-13-14	OK	2.10205	6.99245	1.734	-2.02451	0.0429179	0.21183	no
Glyma01g26230	Glyma01g26230	Glyma01g26230	Gm01:34508385-34510490	14-13-0	14-13-14	OK	14.6016	50.4721	1.78936	-2.32844	0.0198887	0.136562	no
Glyma01g26300	Glyma01g26300	Glyma01g26300	Gm01:34545482-34547230	14-13-0	14-13-14	OK	6.63374	9.32241	0.490879	-0.627087	0.530602	0.827924	no
Glyma01g26310	Glyma01g26310	Glyma01g26310	Gm01:34591834-34592752	14-13-0	14-13-14	NOTEST	0	0	0	0	1	1	no
Glyma01g26325	Glyma01g26325	Glyma01g26325	Gm01:34678298-34679472	14-13-0	14-13-14	NOTEST	0	0	0	0	1	1	no
Glyma01g26340	Glyma01g26340	Glyma01g26340	Gm01:34729733-34732217	14-13-0	14-13-14	OK	0.256561	0.676536	1.39887	-1.22825	0.219355	0.548404	no
Glyma01g26350	Glyma01g26350	Glyma01g26350	Gm01:34828578-34838846	14-13-0	14-13-14	OK	5.51454	3.59526	-0.617143	0.851344	0.394578	0.734239	no
Glyma01g26360	Glyma01g26360	Glyma01g26360	Gm01:34923320-34923989	14-13-0	14-13-14	OK	8.91209	13.8996	0.641207	-0.770263	0.441144	0.771166	no
Glyma01g26570	Glyma01g26570	Glyma01g26570	Gm01:35047812-35050350	14-13-0	14-13-14	NOTEST	0.0634978	0	-1.79769e+308	-1.79769e+308	0.122021	1	no
Glyma01g26580	Glyma01g26580	Glyma01g26580	Gm01:35128362-35132942	14-13-0	14-13-14	OK	0	2.05333	1.79769e+308	1.79769e+308	0.0236675	0.151269	no
Glyma01g26590	Glyma01g26590	Glyma01g26590	Gm01:35185581-35190582	14-13-0	14-13-14	OK	0.0360227	0.500495	3.79638	-3.04941	0.00229295	0.0311267	yes
Glyma01g26600	Glyma01g26600	Glyma01g26600	Gm01:35191726-35193878	14-13-0	14-13-14	OK	5.76251	4.88448	-0.238493	0.277312	0.78154	0.944439	no
Glyma01g26606	Glyma01g26606	Glyma01g26606	Gm01:35221753-35222332	14-13-0	14-13-14	NOTEST	0	0	0	0	1	1	no
Glyma01g26613	Glyma01g26613	Glyma01g26613	Gm01:35260947-35261763	14-13-0	14-13-14	NOTEST	0	0	0	0	1	1	no
Glyma01g26620	Glyma01g26620	Glyma01g26620	Gm01:35271480-35272153	14-13-0	14-13-14	NOTEST	0	0	0	0	1	1	no
Glyma01g26650	Glyma01g26650	Glyma01g26650	Gm01:35317654-35328670	14-13-0	14-13-14	OK	2.80387	3.76947	0.426942	-0.513954	0.607284	0.871743	no
Glyma01g26670	Glyma01g26670	Glyma01g26670	Gm01:35431736-35435954	14-13-0	14-13-14	NOTEST	0.38837	0.296635	-0.388743	0.318772	0.749899	1	no
Glyma01g26681	Glyma01g26681	Glyma01g26681	Gm01:35464370-35465052	14-13-0	14-13-14	NOTEST	0	0	0	0	1	1	no
Glyma01g26690	Glyma01g26690	Glyma01g26690	Gm01:35468032-35472931	14-13-0	14-13-14	OK	0.113952	1.56834	3.78274	-3.02988	0.00244654	0.0322636	yes
Glyma01g26700	Glyma01g26700	Glyma01g26700	Gm01:35501543-35506434	14-13-0	14-13-14	OK	1.52792	3.81902	1.32164	-1.50706	0.131796	0.412343	no
Glyma01g26750	Glyma01g26750	Glyma01g26750	Gm01:35572394-35581615	14-13-0	14-13-14	NOTEST	0.264747	0.019579	-3.75724	1.23913	0.215296	1	no
Glyma01g26766	Glyma01g26766	Glyma01g26766	Gm01:35587717-35588464	14-13-0	14-13-14	NOTEST	0	0	0	0	1	1	no
Glyma01g26783	Glyma01g26783	Glyma01g26783	Gm01:35595556-35596652	14-13-0	14-13-14	NOTEST	0	0	0	0	1	1	no
Glyma01g26800	Glyma01g26800	Glyma01g26800	Gm01:35606472-35610217	14-13-0	14-13-14	NOTEST	0	0	0	0	1	1	no
Glyma01g26813	Glyma01g26813	Glyma01g26813	Gm01:35625153-35625890	14-13-0	14-13-14	NOTEST	0	0	0	0	1	1	no
Glyma01g26826	Glyma01g26826	Glyma01g26826	Gm01:35632686-35633208	14-13-0	14-13-14	NOTEST	0	0	0	0	1	1	no
Glyma01g26840	Glyma01g26840	Glyma01g26840	Gm01:35643767-35646603	14-13-0	14-13-14	OK	5.71726	11.4627	1.00355	-1.30063	0.193385	0.514978	no
Glyma01g26860	Glyma01g26860	Glyma01g26860	Gm01:35688241-35692239	14-13-0	14-13-14	NOTEST	0	0	0	0	1	1	no
Glyma01g26900	Glyma01g26900	Glyma01g26900	Gm01:35719443-35723183	14-13-0	14-13-14	NOTEST	0	0.0228822	1.79769e+308	1.79769e+308	0.200203	1	no
Glyma01g26915	Glyma01g26915	Glyma01g26915	Gm01:35827768-35828303	14-13-0	14-13-14	NOTEST	0	0	0	0	1	1	no
Glyma01g26930	Glyma01g26930	Glyma01g26930	Gm01:35832934-35837033	14-13-0	14-13-14	OK	58.7048	17.5566	-1.74146	1.72035	0.0853686	0.318796	no
Glyma01g26940	Glyma01g26940	Glyma01g26940	Gm01:35863797-35865409	14-13-0	14-13-14	OK	2.61035	5.13528	0.976201	-1.1622	0.245152	0.580811	no
Glyma01g26950	Glyma01g26950	Glyma01g26950	Gm01:35866292-35869400	14-13-0	14-13-14	OK	61.1954	52.5849	-0.218774	0.228116	0.819556	0.956639	no
Glyma01g26961	Glyma01g26961	Glyma01g26961	Gm01:35952581-35954091	14-13-0	14-13-14	NOTEST	0	0	0	0	1	1	no
Glyma01g26970	Glyma01g26970	Glyma01g26970	Gm01:35963018-35964248	14-13-0	14-13-14	OK	91.7871	11.822	-2.95682	3.524	0.000425089	0.0086044	yes
Glyma01g26981	Glyma01g26981	Glyma01g26981	Gm01:35964318-35966630	14-13-0	14-13-14	OK	2.27348	2.37729	0.0644202	-0.0504684	0.959749	0.993174	no
Glyma01g26990	Glyma01g26990	Glyma01g26990	Gm01:35968043-35972769	14-13-0	14-13-14	OK	19.4102	6.75892	-1.52195	2.01457	0.0439498	0.215328	no
Glyma01g27005	Glyma01g27005	Glyma01g27005	Gm01:35977333-35983210	14-13-0	14-13-14	OK	3.43947	0.32493	-3.40399	3.62264	0.000291611	0.00641355	yes
Glyma01g27020	Glyma01g27020	Glyma01g27020	Gm01:36004326-36005428	14-13-0	14-13-14	NOTEST	0	0	0	0	1	1	no
Glyma01g27040	Glyma01g27040	Glyma01g27040	Gm01:36021672-36025699	14-13-0	14-13-14	OK	0	5.07862	1.79769e+308	1.79769e+308	0.00258108	0.0335659	yes
Glyma01g27060	Glyma01g27060	Glyma01g27060	Gm01:36063450-36065354	14-13-0	14-13-14	OK	3.63591	9.1457	1.33078	-1.71165	0.0869608	0.322352	no
Glyma01g27110	Glyma01g27110	Glyma01g27110	Gm01:36127733-36131641	14-13-0	14-13-14	NOTEST	0	0	0	0	1	1	no
Glyma01g27120	Glyma01g27120	Glyma01g27120	Gm01:36147154-36151735	14-13-0	14-13-14	OK	7.27302	2.41553	-1.59022	1.83786	0.066083	0.273118	no
Glyma01g27130	Glyma01g27130	Glyma01g27130	Gm01:36161870-36165133	14-13-0	14-13-14	OK	0.494302	0.685523	0.471813	-0.413478	0.679257	0.904438	no
Glyma01g27145	Glyma01g27145	Glyma01g27145	Gm01:36192774-36194659	14-13-0	14-13-14	NOTEST	0	0	0	0	1	1	no
Glyma01g27160	Glyma01g27160	Glyma01g27160	Gm01:36195997-36196273	14-13-0	14-13-14	NOTEST	0	0	0	0	1	1	no
Glyma01g27170	Glyma01g27170	Glyma01g27170	Gm01:36211478-36213198	14-13-0	14-13-14	OK	1.73619	2.63831	0.603688	-0.505028	0.613539	0.874498	no
Glyma01g27200	Glyma01g27200	Glyma01g27200	Gm01:36246044-36251145	14-13-0	14-13-14	OK	12.2541	7.0003	-0.807774	1.11235	0.26599	0.607712	no
Glyma01g27215	Glyma01g27215	Glyma01g27215	Gm01:36263859-36271059	14-13-0	14-13-14	NOTEST	0.270637	0	-1.79769e+308	-1.79769e+308	0.122021	1	no
Glyma01g27230	Glyma01g27230	Glyma01g27230	Gm01:36326563-36327062	14-13-0	14-13-14	NOTEST	0	0	0	0	1	1	no
Glyma01g27240	Glyma01g27240	Glyma01g27240	Gm01:36332421-36351694	14-13-0	14-13-14	OK	6.0421	6.07183	0.00707954	-0.00982335	0.992162	0.998494	no
Glyma01g27250	Glyma01g27250	Glyma01g27250	Gm01:36369066-36382267	14-13-0	14-13-14	OK	10.9509	8.26394	-0.406149	0.53428	0.593148	0.864452	no
Glyma01g27260	Glyma01g27260	Glyma01g27260	Gm01:36388728-36391729	14-13-0	14-13-14	NOTEST	0	0	0	0	1	1	no
Glyma01g27280	Glyma01g27280	Glyma01g27280	Gm01:36438459-36440199	14-13-0	14-13-14	OK	0.895087	1.6446	0.877636	-0.842055	0.399757	0.73828	no
Glyma01g27291	Glyma01g27291	Glyma01g27291	Gm01:36450899-36454001	14-13-0	14-13-14	OK	0.689506	0.934079	0.437982	-0.34216	0.732231	0.926059	no
Glyma01g27301	Glyma01g27301	Glyma01g27301	Gm01:36450899-36454001	14-13-0	14-13-14	NOTEST	0	0	0	0	1	1	no
Glyma01g27310	Glyma01g27310	Glyma01g27310	Gm01:36464465-36465566	14-13-0	14-13-14	NOTEST	0	0	0	0	1	1	no
Glyma01g27360	Glyma01g27360	Glyma01g27360	Gm01:36545021-36547291	14-13-0	14-13-14	OK	0.0678066	0.865906	3.67471	-3.1149	0.00184005	0.0262888	yes
Glyma01g27385	Glyma01g27385	Glyma01g27385	Gm01:36610052-36610460	14-13-0	14-13-14	NOTEST	0	0	0	0	1	1	no
Glyma01g27410	Glyma01g27410	Glyma01g27410	Gm01:36654803-36655111	14-13-0	14-13-14	NOTEST	0	0	0	0	1	1	no
Glyma01g27440	Glyma01g27440	Glyma01g27440	Gm01:36685735-36695527	14-13-0	14-13-14	NOTEST	0	0.0963378	1.79769e+308	1.79769e+308	0.0566328	1	no
Glyma01g27455	Glyma01g27455	Glyma01g27455	Gm01:36705021-36712560	14-13-0	14-13-14	OK	0.270949	0.554792	1.03393	-0.999703	0.317454	0.664579	no
Glyma01g27470	Glyma01g27470	Glyma01g27470	Gm01:36735448-36737186	14-13-0	14-13-14	NOTEST	0	0	0	0	1	1	no
Glyma01g27490	Glyma01g27490	Glyma01g27490	Gm01:36794254-36798874	14-13-0	14-13-14	NOTEST	0	0.0189133	1.79769e+308	1.79769e+308	0.332274	1	no
Glyma01g27710	Glyma01g27710	Glyma01g27710	Gm01:36987889-36992462	14-13-0	14-13-14	OK	2.75506	4.41997	0.681952	-0.890319	0.373295	0.715688	no
Glyma01g27720	Glyma01g27720	Glyma01g27720	Gm01:37036140-37038376	14-13-0	14-13-14	OK	0.233426	0.470577	1.01147	-0.839513	0.401182	0.738851	no
Glyma01g27765	Glyma01g27765	Glyma01g27765	Gm01:37212445-37213145	14-13-0	14-13-14	NOTEST	0	0	0	0	1	1	no
Glyma01g27810	Glyma01g27810	Glyma01g27810	Gm01:37231576-37233997	14-13-0	14-13-14	OK	8.98	3.38031	-1.40956	1.90269	0.0570816	0.250659	no
Glyma01g27840	Glyma01g27840	Glyma01g27840	Gm01:37299487-37305059	14-13-0	14-13-14	OK	19.8127	21.3352	0.106809	-0.135219	0.892439	0.977208	no
Glyma01g27860	Glyma01g27860	Glyma01g27860	Gm01:37321469-37321784	14-13-0	14-13-14	NOTEST	0	0	0	0	1	1	no
Glyma01g27890	Glyma01g27890	Glyma01g27890	Gm01:37336991-37338203	14-13-0	14-13-14	OK	0.830139	0.287302	-1.53078	1.23525	0.216736	0.544374	no
Glyma01g27900	Glyma01g27900	Glyma01g27900	Gm01:37379998-37383931	14-13-0	14-13-14	OK	14.3365	11.5204	-0.315495	0.42569	0.670334	0.900072	no
Glyma01g27910	Glyma01g27910	Glyma01g27910	Gm01:37406845-37408224	14-13-0	14-13-14	NOTEST	0	0	0	0	1	1	no
Glyma01g27941	Glyma01g27941	Glyma01g27941	Gm01:37433263-37434146	14-13-0	14-13-14	NOTEST	0	0	0	0	1	1	no
Glyma01g27970	Glyma01g27970	Glyma01g27970	Gm01:37457417-37460795	14-13-0	14-13-14	NOTEST	0	0.145045	1.79769e+308	1.79769e+308	0.0780415	1	no
Glyma01g28026	Glyma01g28026	Glyma01g28026	Gm01:37580338-37581229	14-13-0	14-13-14	NOTEST	0	0	0	0	1	1	no
Glyma01g28082	Glyma01g28082	Glyma01g28082	Gm01:37587054-37587942	14-13-0	14-13-14	NOTEST	0	0	0	0	1	1	no
Glyma01g28139	Glyma01g28139	Glyma01g28139	Gm01:37594369-37595242	14-13-0	14-13-14	NOTEST	0	0	0	0	1	1	no
Glyma01g28196	Glyma01g28196	Glyma01g28196	Gm01:37611247-37612183	14-13-0	14-13-14	NOTEST	0	0	0	0	1	1	no
Glyma01g28253	Glyma01g28253	Glyma01g28253	Gm01:37911350-37912244	14-13-0	14-13-14	NOTEST	0	0	0	0	1	1	no
Glyma01g28310	Glyma01g28310	Glyma01g28310	Gm01:37913283-37917411	14-13-0	14-13-14	OK	2.49767	6.2218	1.31675	-1.51672	0.129337	0.408186	no
Glyma01g28353	Glyma01g28353	Glyma01g28353	Gm01:38060909-38061301	14-13-0	14-13-14	OK	0.470147	0	-1.79769e+308	-1.79769e+308	0.122021	0.393515	no
Glyma01g28396	Glyma01g28396	Glyma01g28396	Gm01:38199627-38200321	14-13-0	14-13-14	OK	478.264	143.104	-1.74075	1.95111	0.0510443	0.234813	no
Glyma01g28440	Glyma01g28440	Glyma01g28440	Gm01:38205261-38207629	14-13-0	14-13-14	OK	0.646689	5.32657	3.04206	-3.34915	0.000810609	0.0139525	yes
Glyma01g28460	Glyma01g28460	Glyma01g28460	Gm01:38222786-38224222	14-13-0	14-13-14	NOTEST	0	0	0	0	1	1	no
Glyma01g28480	Glyma01g28480	Glyma01g28480	Gm01:38248791-38250401	14-13-0	14-13-14	NOTEST	0	0	0	0	1	1	no
Glyma01g28491	Glyma01g28491	Glyma01g28491	Gm01:38259681-38270227	14-13-0	14-13-14	NOTEST	0	0	0	0	1	1	no
Glyma01g28500	Glyma01g28500	Glyma01g28500	Gm01:38308110-38309077	14-13-0	14-13-14	OK	111.499	88.611	-0.331472	0.392513	0.694679	0.910835	no
Glyma01g28511	Glyma01g28511	Glyma01g28511	Gm01:38309608-38311167	14-13-0	14-13-14	NOTEST	0	0.0978837	1.79769e+308	1.79769e+308	0.0780415	1	no
Glyma01g28520	Glyma01g28520	Glyma01g28520	Gm01:38386523-38391051	14-13-0	14-13-14	OK	8.82793	0.957225	-3.20515	2.84188	0.00448487	0.0499319	yes
Glyma01g28550	Glyma01g28550	Glyma01g28550	Gm01:38422858-38424428	14-13-0	14-13-14	NOTEST	0	0	0	0	1	1	no
Glyma01g28626	Glyma01g28626	Glyma01g28626	Gm01:38529390-38530425	14-13-0	14-13-14	NOTEST	0	0	0	0	1	1	no
Glyma01g28703	Glyma01g28703	Glyma01g28703	Gm01:38575000-38577422	14-13-0	14-13-14	OK	0.21736	11.1783	5.68447	-4.93612	7.9693e-07	6.13853e-05	yes
Glyma01g28780	Glyma01g28780	Glyma01g28780	Gm01:38596171-38598279	14-13-0	14-13-14	OK	0	1.54837	1.79769e+308	1.79769e+308	0.0132421	0.104555	no
Glyma01g28800	Glyma01g28800	Glyma01g28800	Gm01:38660680-38662575	14-13-0	14-13-14	NOTEST	0	0.102529	1.79769e+308	1.79769e+308	0.070927	1	no
Glyma01g28805	Glyma01g28805	Glyma01g28805	Gm01:38690273-38690984	14-13-0	14-13-14	NOTEST	0	0	0	0	1	1	no
Glyma01g28810	Glyma01g28810	Glyma01g28810	Gm01:38692764-38695649	14-13-0	14-13-14	OK	1943.69	644.632	-1.59225	0.708413	0.478689	0.79589	no
Glyma01g28820	Glyma01g28820	Glyma01g28820	Gm01:38703774-38707276	14-13-0	14-13-14	OK	62.4097	28.0912	-1.15165	0.944456	0.344937	0.691019	no
Glyma01g28830	Glyma01g28830	Glyma01g28830	Gm01:38709310-38713735	14-13-0	14-13-14	OK	21.8936	6.70407	-1.7074	2.30286	0.0212867	0.142607	no
Glyma01g28841	Glyma01g28841	Glyma01g28841	Gm01:38749817-38751606	14-13-0	14-13-14	NOTEST	0	0	0	0	1	1	no
Glyma01g28850	Glyma01g28850	Glyma01g28850	Gm01:38758937-38772979	14-13-0	14-13-14	NOTEST	0	0.0215197	1.79769e+308	1.79769e+308	0.200203	1	no
Glyma01g28865	Glyma01g28865	Glyma01g28865	Gm01:38774846-38778332	14-13-0	14-13-14	NOTEST	0.258675	0	-1.79769e+308	-1.79769e+308	0.0525576	1	no
Glyma01g28880	Glyma01g28880	Glyma01g28880	Gm01:38811474-38819368	14-13-0	14-13-14	NOTEST	0	0	0	0	1	1	no
Glyma01g28890	Glyma01g28890	Glyma01g28890	Gm01:38825959-38830479	14-13-0	14-13-14	NOTEST	0	0	0	0	1	1	no
Glyma01g28936	Glyma01g28936	Glyma01g28936	Gm01:38986023-38989868	14-13-0	14-13-14	OK	1.56852	0.0549607	-4.83486	4.21516	2.49606e-05	0.000971209	yes
Glyma01g28983	Glyma01g28983	Glyma01g28983	Gm01:39101552-39101978	14-13-0	14-13-14	NOTEST	0	0	0	0	1	1	no
Glyma01g29030	Glyma01g29030	Glyma01g29030	Gm01:39117816-39121119	14-13-0	14-13-14	NOTEST	0.240856	0.102669	-1.23018	0.998427	0.318072	1	no
Glyma01g29070	Glyma01g29070	Glyma01g29070	Gm01:39200746-39201279	14-13-0	14-13-14	NOTEST	0	0	0	0	1	1	no
Glyma01g29091	Glyma01g29091	Glyma01g29091	Gm01:39202322-39203074	14-13-0	14-13-14	NOTEST	0	0	0	0	1	1	no
Glyma01g29110	Glyma01g29110	Glyma01g29110	Gm01:39206637-39207905	14-13-0	14-13-14	NOTEST	0	0	0	0	1	1	no
Glyma01g29131	Glyma01g29131	Glyma01g29131	Gm01:39211228-39211501	14-13-0	14-13-14	NOTEST	0	0	0	0	1	1	no
Glyma01g29150	Glyma01g29150	Glyma01g29150	Gm01:39249319-39254445	14-13-0	14-13-14	OK	2.82711	2.73117	-0.0498106	0.0652423	0.947981	0.99104	no
Glyma01g29171	Glyma01g29171	Glyma01g29171	Gm01:39255360-39265417	14-13-0	14-13-14	OK	0.627774	1.85845	1.56578	-1.27097	0.203738	0.528094	no
Glyma01g29190	Glyma01g29190	Glyma01g29190	Gm01:39285279-39288819	14-13-0	14-13-14	NOTEST	0	0	0	0	1	1	no
Glyma01g29220	Glyma01g29220	Glyma01g29220	Gm01:39316166-39317298	14-13-0	14-13-14	NOTEST	0	0	0	0	1	1	no
Glyma01g29230	Glyma01g29230	Glyma01g29230	Gm01:39317900-39318629	14-13-0	14-13-14	NOTEST	0	0	0	0	1	1	no
Glyma01g29255	Glyma01g29255	Glyma01g29255	Gm01:39318953-39319509	14-13-0	14-13-14	NOTEST	0	0	0	0	1	1	no
Glyma01g29280	Glyma01g29280	Glyma01g29280	Gm01:39350672-39358098	14-13-0	14-13-14	OK	3.30674	4.60931	0.479141	-0.594551	0.552144	0.841535	no
Glyma01g29305	Glyma01g29305	Glyma01g29305	Gm01:39376341-39388072	14-13-0	14-13-14	OK	1.37943	4.53761	1.71787	-1.78265	0.0746437	0.293659	no
Glyma01g29330	Glyma01g29330	Glyma01g29330	Gm01:39403861-39412277	14-13-0	14-13-14	OK	1.18677	4.70859	1.98826	-2.25585	0.0240803	0.152443	no
Glyma01g29346	Glyma01g29346	Glyma01g29346	Gm01:39421332-39429591	14-13-0	14-13-14	OK	0.910365	2.90741	1.67522	-1.63062	0.10297	0.356683	no
Glyma01g29362	Glyma01g29362	Glyma01g29362	Gm01:39443729-39458833	14-13-0	14-13-14	OK	4.51412	11.6594	1.36898	-1.78795	0.0737847	0.291593	no
Glyma01g29378	Glyma01g29378	Glyma01g29378	Gm01:39478263-39516299	14-13-0	14-13-14	OK	1.35837	3.46507	1.351	-1.63663	0.101709	0.353742	no
Glyma01g29394	Glyma01g29394	Glyma01g29394	Gm01:39526777-39530894	14-13-0	14-13-14	NOTEST	0	0.0140239	1.79769e+308	1.79769e+308	0.200203	1	no
Glyma01g29410	Glyma01g29410	Glyma01g29410	Gm01:39591646-39594997	14-13-0	14-13-14	OK	1.24855	1.52511	0.288667	-0.285108	0.775562	0.943087	no
Glyma01g29420	Glyma01g29420	Glyma01g29420	Gm01:39597740-39602942	14-13-0	14-13-14	OK	29.3119	8.15089	-1.84646	2.41366	0.0157931	0.117734	no
Glyma01g29440	Glyma01g29440	Glyma01g29440	Gm01:39655886-39656000	14-13-0	14-13-14	NOTEST	0	0	0	0	1	1	no
Glyma01g29470	Glyma01g29470	Glyma01g29470	Gm01:39787035-39797571	14-13-0	14-13-14	OK	5.84981	3.50998	-0.736929	1.01906	0.308173	0.654854	no
Glyma01g29480	Glyma01g29480	Glyma01g29480	Gm01:39799515-39801235	14-13-0	14-13-14	NOTEST	0	0	0	0	1	1	no
Glyma01g29495	Glyma01g29495	Glyma01g29495	Gm01:39818462-39819244	14-13-0	14-13-14	NOTEST	0	0	0	0	1	1	no
Glyma01g29511	Glyma01g29511	Glyma01g29511	Gm01:39824538-39825839	14-13-0	14-13-14	NOTEST	0	0	0	0	1	1	no
Glyma01g29525	Glyma01g29525	Glyma01g29525	Gm01:39837032-39837374	14-13-0	14-13-14	NOTEST	0	0	0	0	1	1	no
Glyma01g29540	Glyma01g29540	Glyma01g29540	Gm01:39848379-39851083	14-13-0	14-13-14	OK	37.4292	17.796	-1.07261	1.38474	0.166131	0.472917	no
Glyma01g29570	Glyma01g29570	Glyma01g29570	Gm01:39879227-39883100	14-13-0	14-13-14	NOTEST	0	0.0519015	1.79769e+308	1.79769e+308	0.070927	1	no
Glyma01g29580	Glyma01g29580	Glyma01g29580	Gm01:39898856-39902291	14-13-0	14-13-14	NOTEST	0	0	0	0	1	1	no
Glyma01g29600	Glyma01g29600	Glyma01g29600	Gm01:39918097-39921140	14-13-0	14-13-14	NOTEST	0	0	0	0	1	1	no
Glyma01g29615	Glyma01g29615	Glyma01g29615	Gm01:39935345-39939812	14-13-0	14-13-14	NOTEST	0.0633571	0.0617671	-0.0366662	0.0270634	0.978409	1	no
Glyma01g29630	Glyma01g29630	Glyma01g29630	Gm01:39945735-39949387	14-13-0	14-13-14	OK	54.0881	16.9101	-1.67743	1.69391	0.0902827	0.329195	no
Glyma01g29643	Glyma01g29643	Glyma01g29643	Gm01:39958765-39959672	14-13-0	14-13-14	NOTEST	0	0	0	0	1	1	no
Glyma01g29656	Glyma01g29656	Glyma01g29656	Gm01:39965927-39966511	14-13-0	14-13-14	NOTEST	0	0	0	0	1	1	no
Glyma01g29670	Glyma01g29670	Glyma01g29670	Gm01:39988960-39991138	14-13-0	14-13-14	OK	0.183187	2.27227	3.63275	-3.25485	0.00113452	0.0180498	yes
Glyma01g29715	Glyma01g29715	Glyma01g29715	Gm01:40029815-40030406	14-13-0	14-13-14	NOTEST	0	0	0	0	1	1	no
Glyma01g29760	Glyma01g29760	Glyma01g29760	Gm01:40077200-40079998	14-13-0	14-13-14	NOTEST	0	0.192954	1.79769e+308	1.79769e+308	0.062836	1	no
Glyma01g29816	Glyma01g29816	Glyma01g29816	Gm01:40154962-40155672	14-13-0	14-13-14	NOTEST	0	0	0	0	1	1	no
Glyma01g29873	Glyma01g29873	Glyma01g29873	Gm01:40234344-40236298	14-13-0	14-13-14	NOTEST	0	0.0182949	1.79769e+308	1.79769e+308	0.200203	1	no
Glyma01g29930	Glyma01g29930	Glyma01g29930	Gm01:40499102-40503250	14-13-0	14-13-14	OK	2.2278	4.26844	0.938085	-0.967756	0.333166	0.680443	no
Glyma01g29950	Glyma01g29950	Glyma01g29950	Gm01:40560867-40564466	14-13-0	14-13-14	OK	7.60577	15.7776	1.05271	-1.4454	0.148345	0.442798	no
Glyma01g29970	Glyma01g29970	Glyma01g29970	Gm01:40574051-40575558	14-13-0	14-13-14	NOTEST	0	0	0	0	1	1	no
Glyma01g30000	Glyma01g30000	Glyma01g30000	Gm01:40668497-40669995	14-13-0	14-13-14	NOTEST	0	0	0	0	1	1	no
Glyma01g30010	Glyma01g30010	Glyma01g30010	Gm01:40681967-40683465	14-13-0	14-13-14	NOTEST	0	0	0	0	1	1	no
Glyma01g30020	Glyma01g30020	Glyma01g30020	Gm01:40733504-40735002	14-13-0	14-13-14	NOTEST	0	0	0	0	1	1	no
Glyma01g30030	Glyma01g30030	Glyma01g30030	Gm01:40745198-40746696	14-13-0	14-13-14	NOTEST	0	0	0	0	1	1	no
Glyma01g30040	Glyma01g30040	Glyma01g30040	Gm01:40756924-40758421	14-13-0	14-13-14	NOTEST	0	0	0	0	1	1	no
Glyma01g30060	Glyma01g30060	Glyma01g30060	Gm01:40769686-40771162	14-13-0	14-13-14	NOTEST	0	0	0	0	1	1	no
Glyma01g30080	Glyma01g30080	Glyma01g30080	Gm01:40777029-40778052	14-13-0	14-13-14	NOTEST	0	0	0	0	1	1	no
Glyma01g30300	Glyma01g30300	Glyma01g30300	Gm01:40952282-40957143	14-13-0	14-13-14	OK	3.134	3.77271	0.267595	-0.330556	0.74098	0.930033	no
Glyma01g30320	Glyma01g30320	Glyma01g30320	Gm01:40964890-40985483	14-13-0	14-13-14	OK	9.24766	5.22889	-0.822585	1.07591	0.281968	0.626618	no
Glyma01g30335	Glyma01g30335	Glyma01g30335	Gm01:40964890-40985483	14-13-0	14-13-14	NOTEST	0	0	0	0	1	1	no
Glyma01g30350	Glyma01g30350	Glyma01g30350	Gm01:41014087-41016040	14-13-0	14-13-14	OK	49.603	34.733	-0.514118	0.640683	0.521729	0.822237	no
Glyma01g30370	Glyma01g30370	Glyma01g30370	Gm01:41043490-41043758	14-13-0	14-13-14	NOTEST	0	0	0	0	1	1	no
Glyma01g30390	Glyma01g30390	Glyma01g30390	Gm01:41062775-41066889	14-13-0	14-13-14	OK	4.1912	0.687188	-2.60859	2.67245	0.00752985	0.0710733	no
Glyma01g30400	Glyma01g30400	Glyma01g30400	Gm01:41067190-41075707	14-13-0	14-13-14	OK	10.6717	13.1131	0.297217	-0.406572	0.684323	0.906655	no
Glyma01g30431	Glyma01g30431	Glyma01g30431	Gm01:41163921-41165539	14-13-0	14-13-14	NOTEST	0	0	0	0	1	1	no
Glyma01g30460	Glyma01g30460	Glyma01g30460	Gm01:41170972-41176563	14-13-0	14-13-14	NOTEST	0	0	0	0	1	1	no
Glyma01g30485	Glyma01g30485	Glyma01g30485	Gm01:41170972-41176563	14-13-0	14-13-14	NOTEST	0.0647647	0	-1.79769e+308	-1.79769e+308	0.0873766	1	no
Glyma01g30511	Glyma01g30511	Glyma01g30511	Gm01:41210645-41210897	14-13-0	14-13-14	NOTEST	0	0	0	0	1	1	no
Glyma01g30535	Glyma01g30535	Glyma01g30535	Gm01:41215563-41218988	14-13-0	14-13-14	NOTEST	0	0	0	0	1	1	no
Glyma01g30560	Glyma01g30560	Glyma01g30560	Gm01:41232630-41234794	14-13-0	14-13-14	NOTEST	0	0	0	0	1	1	no
Glyma01g30610	Glyma01g30610	Glyma01g30610	Gm01:41406971-41411553	14-13-0	14-13-14	NOTEST	0	0.133198	1.79769e+308	1.79769e+308	0.0654322	1	no
Glyma01g30626	Glyma01g30626	Glyma01g30626	Gm01:41440314-41440973	14-13-0	14-13-14	NOTEST	0	0	0	0	1	1	no
Glyma01g30643	Glyma01g30643	Glyma01g30643	Gm01:41457347-41461938	14-13-0	14-13-14	NOTEST	0	0	0	0	1	1	no
Glyma01g30660	Glyma01g30660	Glyma01g30660	Gm01:41493462-41493999	14-13-0	14-13-14	NOTEST	0	0	0	0	1	1	no
Glyma01g30670	Glyma01g30670	Glyma01g30670	Gm01:41495108-41496829	14-13-0	14-13-14	NOTEST	0	0.154529	1.79769e+308	1.79769e+308	0.0780415	1	no
Glyma01g30900	Glyma01g30900	Glyma01g30900	Gm01:41673575-41673782	14-13-0	14-13-14	NOTEST	0	0	0	0	1	1	no
Glyma01g30910	Glyma01g30910	Glyma01g30910	Gm01:41681659-41690953	14-13-0	14-13-14	OK	14.1243	12.8513	-0.136269	0.189365	0.849807	0.966358	no
Glyma01g30920	Glyma01g30920	Glyma01g30920	Gm01:41691541-41699290	14-13-0	14-13-14	NOTEST	0.0968442	0.0337646	-1.52015	0.982215	0.325994	1	no
Glyma01g30982	Glyma01g30982	Glyma01g30982	Gm01:41712879-41714252	14-13-0	14-13-14	OK	1.04742	1.21298	0.211717	-0.191968	0.847768	0.965743	no
Glyma01g31044	Glyma01g31044	Glyma01g31044	Gm01:41890431-41892644	14-13-0	14-13-14	OK	2.06754	0.425544	-2.28054	2.1057	0.0352307	0.189863	no
Glyma01g31107	Glyma01g31107	Glyma01g31107	Gm01:41928201-41933073	14-13-0	14-13-14	NOTEST	0	0	0	0	1	1	no
Glyma01g31170	Glyma01g31170	Glyma01g31170	Gm01:41986790-41991338	14-13-0	14-13-14	OK	3.55811	2.80666	-0.342258	0.463878	0.642735	0.888708	no
Glyma01g31180	Glyma01g31180	Glyma01g31180	Gm01:41992765-41993572	14-13-0	14-13-14	OK	0.866035	1.18622	0.45387	-0.384799	0.700386	0.91379	no
Glyma01g31230	Glyma01g31230	Glyma01g31230	Gm01:42040491-42046500	14-13-0	14-13-14	OK	0	0.695131	1.79769e+308	1.79769e+308	0.0835182	0.314363	no
Glyma01g31260	Glyma01g31260	Glyma01g31260	Gm01:42062020-42069161	14-13-0	14-13-14	OK	8.40342	5.85262	-0.521893	0.692908	0.488368	0.802457	no
Glyma01g31270	Glyma01g31270	Glyma01g31270	Gm01:42071523-42074445	14-13-0	14-13-14	OK	27.5665	7.45162	-1.88729	2.51717	0.0118302	0.0972114	no
Glyma01g31275	Glyma01g31275	Glyma01g31275	Gm01:42077853-42078844	14-13-0	14-13-14	NOTEST	0	0	0	0	1	1	no
Glyma01g31280	Glyma01g31280	Glyma01g31280	Gm01:42077853-42078844	14-13-0	14-13-14	NOTEST	0	0	0	0	1	1	no
Glyma01g31300	Glyma01g31300	Glyma01g31300	Gm01:42124055-42127597	14-13-0	14-13-14	OK	653.14	11.9711	-5.76977	4.97323	6.58481e-07	5.21364e-05	yes
Glyma01g31311	Glyma01g31311	Glyma01g31311	Gm01:42143417-42149831	14-13-0	14-13-14	OK	9.34773	4.28038	-1.12688	1.35679	0.174849	0.487784	no
Glyma01g31320	Glyma01g31320	Glyma01g31320	Gm01:42162374-42164312	14-13-0	14-13-14	OK	5.94403	8.66688	0.544071	-0.741387	0.458459	0.783748	no
Glyma01g31341	Glyma01g31341	Glyma01g31341	Gm01:42226588-42230852	14-13-0	14-13-14	NOTEST	0	0	0	0	1	1	no
Glyma01g31360	Glyma01g31360	Glyma01g31360	Gm01:42232501-42236451	14-13-0	14-13-14	OK	29.1162	22.3878	-0.379112	0.445158	0.656206	0.894901	no
Glyma01g31370	Glyma01g31370	Glyma01g31370	Gm01:42261741-42265856	14-13-0	14-13-14	OK	0.3243	0.667055	1.04048	-0.930417	0.352155	0.697346	no
Glyma01g31425	Glyma01g31425	Glyma01g31425	Gm01:42373253-42374275	14-13-0	14-13-14	OK	3.70792	2.52717	-0.553088	0.472904	0.636282	0.885837	no
Glyma01g31480	Glyma01g31480	Glyma01g31480	Gm01:42378220-42384123	14-13-0	14-13-14	OK	0.890999	1.1432	0.359585	-0.394221	0.693418	0.910309	no
Glyma01g31520	Glyma01g31520	Glyma01g31520	Gm01:42469464-42474210	14-13-0	14-13-14	NOTEST	0	0	0	0	1	1	no
Glyma01g31550	Glyma01g31550	Glyma01g31550	Gm01:42548413-42558287	14-13-0	14-13-14	NOTEST	0	0	0	0	1	1	no
Glyma01g31570	Glyma01g31570	Glyma01g31570	Gm01:42586307-42593931	14-13-0	14-13-14	OK	6.92504	3.78931	-0.86989	1.15876	0.246555	0.582607	no
Glyma01g31581	Glyma01g31581	Glyma01g31581	Gm01:42597638-42599280	14-13-0	14-13-14	NOTEST	0	0	0	0	1	1	no
Glyma01g31590	Glyma01g31590	Glyma01g31590	Gm01:42607296-42611243	14-13-0	14-13-14	OK	0.18634	4.71344	4.66077	-4.80545	1.54408e-06	0.00010472	yes
Glyma01g31600	Glyma01g31600	Glyma01g31600	Gm01:42628300-42629673	14-13-0	14-13-14	OK	33.0943	37.9326	0.196856	-0.249561	0.802927	0.951956	no
Glyma01g31610	Glyma01g31610	Glyma01g31610	Gm01:42631340-42634983	14-13-0	14-13-14	OK	27.3208	16.8178	-0.70001	0.928929	0.352926	0.698138	no
Glyma01g31630	Glyma01g31630	Glyma01g31630	Gm01:42661065-42664809	14-13-0	14-13-14	OK	0.449369	1.43127	1.67133	-1.32526	0.185085	0.502572	no
Glyma01g31636	Glyma01g31636	Glyma01g31636	Gm01:42667422-42670895	14-13-0	14-13-14	NOTEST	0	0	0	0	1	1	no
Glyma01g31643	Glyma01g31643	Glyma01g31643	Gm01:42681129-42683618	14-13-0	14-13-14	NOTEST	0	0	0	0	1	1	no
Glyma01g31650	Glyma01g31650	Glyma01g31650	Gm01:42697267-42701819	14-13-0	14-13-14	NOTEST	0	0.0456386	1.79769e+308	1.79769e+308	0.117179	1	no
Glyma01g31660	Glyma01g31660	Glyma01g31660	Gm01:42724418-42726114	14-13-0	14-13-14	NOTEST	0.218543	0.10958	-0.995935	0.694107	0.487615	1	no
Glyma01g31670	Glyma01g31670	Glyma01g31670	Gm01:42752424-42753269	14-13-0	14-13-14	NOTEST	0	0	0	0	1	1	no
Glyma01g31691	Glyma01g31691	Glyma01g31691	Gm01:42756407-42766923	14-13-0	14-13-14	NOTEST	0	0	0	0	1	1	no
Glyma01g31711	Glyma01g31711	Glyma01g31711	Gm01:42786261-42789612	14-13-0	14-13-14	NOTEST	0	0	0	0	1	1	no
Glyma01g31730	Glyma01g31730	Glyma01g31730	Gm01:42867418-42868294	14-13-0	14-13-14	NOTEST	0	0	0	0	1	1	no
Glyma01g31750	Glyma01g31750	Glyma01g31750	Gm01:42942064-42943179	14-13-0	14-13-14	OK	16.2458	8.04888	-1.01321	1.37691	0.168542	0.476756	no
Glyma01g31760	Glyma01g31760	Glyma01g31760	Gm01:42947350-42947710	14-13-0	14-13-14	NOTEST	0	0	0	0	1	1	no
Glyma01g31780	Glyma01g31780	Glyma01g31780	Gm01:42956928-42957282	14-13-0	14-13-14	NOTEST	0	0	0	0	1	1	no
Glyma01g31801	Glyma01g31801	Glyma01g31801	Gm01:43007888-43008997	14-13-0	14-13-14	NOTEST	0	0	0	0	1	1	no
Glyma01g31820	Glyma01g31820	Glyma01g31820	Gm01:43013160-43013421	14-13-0	14-13-14	NOTEST	0	0	0	0	1	1	no
Glyma01g31830	Glyma01g31830	Glyma01g31830	Gm01:43025615-43026886	14-13-0	14-13-14	OK	8.44172	9.78815	0.2135	-0.290034	0.77179	0.941558	no
Glyma01g31840	Glyma01g31840	Glyma01g31840	Gm01:43069330-43072880	14-13-0	14-13-14	OK	0.682064	2.81644	2.04589	-2.28187	0.0224968	0.146983	no
Glyma01g31850	Glyma01g31850	Glyma01g31850	Gm01:43076459-43079732	14-13-0	14-13-14	NOTEST	0	0	0	0	1	1	no
Glyma01g31860	Glyma01g31860	Glyma01g31860	Gm01:43090292-43094391	14-13-0	14-13-14	NOTEST	0	0	0	0	1	1	no
Glyma01g31890	Glyma01g31890	Glyma01g31890	Gm01:43130697-43137550	14-13-0	14-13-14	NOTEST	0	0	0	0	1	1	no
Glyma01g31900	Glyma01g31900	Glyma01g31900	Gm01:43140964-43144007	14-13-0	14-13-14	NOTEST	0.0453402	0.364756	3.00807	-2.01042	0.0443863	1	no
Glyma01g31910	Glyma01g31910	Glyma01g31910	Gm01:43154205-43156585	14-13-0	14-13-14	NOTEST	0	0	0	0	1	1	no
Glyma01g31921	Glyma01g31921	Glyma01g31921	Gm01:43157131-43160950	14-13-0	14-13-14	OK	0.373862	0.572632	0.615105	-0.554461	0.579263	0.856939	no
Glyma01g31930	Glyma01g31930	Glyma01g31930	Gm01:43173872-43179341	14-13-0	14-13-14	OK	2.37788	1.32978	-0.838491	1.0164	0.309441	0.656019	no
Glyma01g31940	Glyma01g31940	Glyma01g31940	Gm01:43217711-43224924	14-13-0	14-13-14	NOTEST	0.380673	0.159353	-1.25633	0.953652	0.34026	1	no
Glyma01g31961	Glyma01g31961	Glyma01g31961	Gm01:43241123-43245445	14-13-0	14-13-14	NOTEST	0	0	0	0	1	1	no
Glyma01g31980	Glyma01g31980	Glyma01g31980	Gm01:43250905-43255641	14-13-0	14-13-14	NOTEST	0	0.189544	1.79769e+308	1.79769e+308	0.363641	1	no
Glyma01g31990	Glyma01g31990	Glyma01g31990	Gm01:43250905-43255641	14-13-0	14-13-14	OK	7.80855	5.91348	-0.401047	0.502605	0.615242	0.875273	no
Glyma01g32000	Glyma01g32000	Glyma01g32000	Gm01:43264508-43272659	14-13-0	14-13-14	OK	5.72831	5.62023	-0.0274805	0.0359733	0.971304	0.995419	no
Glyma01g32010	Glyma01g32010	Glyma01g32010	Gm01:43337913-43338530	14-13-0	14-13-14	NOTEST	0	0	0	0	1	1	no
Glyma01g32020	Glyma01g32020	Glyma01g32020	Gm01:43341907-43343025	14-13-0	14-13-14	NOTEST	0	0	0	0	1	1	no
Glyma01g32031	Glyma01g32031	Glyma01g32031	Gm01:43354010-43355755	14-13-0	14-13-14	NOTEST	0	0	0	0	1	1	no
Glyma01g32040	Glyma01g32040	Glyma01g32040	Gm01:43398690-43400994	14-13-0	14-13-14	NOTEST	0	0	0	0	1	1	no
Glyma01g32070	Glyma01g32070	Glyma01g32070	Gm01:43424973-43427243	14-13-0	14-13-14	NOTEST	0	0	0	0	1	1	no
Glyma01g32081	Glyma01g32081	Glyma01g32081	Gm01:43450179-43450730	14-13-0	14-13-14	NOTEST	0	0	0	0	1	1	no
Glyma01g32090	Glyma01g32090	Glyma01g32090	Gm01:43463846-43470841	14-13-0	14-13-14	OK	2.27016	1.43783	-0.658899	0.712293	0.476283	0.795035	no
Glyma01g32103	Glyma01g32103	Glyma01g32103	Gm01:43463846-43470841	14-13-0	14-13-14	NOTEST	0.332792	0.14948	-1.15466	0.207782	0.835399	1	no
Glyma01g32116	Glyma01g32116	Glyma01g32116	Gm01:43502972-43506823	14-13-0	14-13-14	NOTEST	0.307678	0.0646796	-2.25004	1.65001	0.0989408	1	no
Glyma01g32130	Glyma01g32130	Glyma01g32130	Gm01:43553617-43555903	14-13-0	14-13-14	OK	0	20.4339	1.79769e+308	1.79769e+308	0.0149831	0.113839	no
Glyma01g32140	Glyma01g32140	Glyma01g32140	Gm01:43570735-43574743	14-13-0	14-13-14	OK	1.28607	8.25815	2.68285	-2.74956	0.00596755	0.0606119	no
Glyma01g32160	Glyma01g32160	Glyma01g32160	Gm01:43604977-43607065	14-13-0	14-13-14	NOTEST	0	0	0	0	1	1	no
Glyma01g32190	Glyma01g32190	Glyma01g32190	Gm01:43621003-43623360	14-13-0	14-13-14	NOTEST	0	0	0	0	1	1	no
Glyma01g32211	Glyma01g32211	Glyma01g32211	Gm01:43638172-43638537	14-13-0	14-13-14	NOTEST	0	0	0	0	1	1	no
Glyma01g32230	Glyma01g32230	Glyma01g32230	Gm01:43687454-43687922	14-13-0	14-13-14	NOTEST	0	0	0	0	1	1	no
Glyma01g32270	Glyma01g32270	Glyma01g32270	Gm01:43720350-43722510	14-13-0	14-13-14	NOTEST	0	0	0	0	1	1	no
Glyma01g32291	Glyma01g32291	Glyma01g32291	Gm01:43773470-43774094	14-13-0	14-13-14	OK	0.674872	0.180971	-1.89885	0.950407	0.341906	0.68921	no
Glyma01g32310	Glyma01g32310	Glyma01g32310	Gm01:43784204-43786716	14-13-0	14-13-14	NOTEST	0	0	0	0	1	1	no
Glyma01g32340	Glyma01g32340	Glyma01g32340	Gm01:43819827-43820154	14-13-0	14-13-14	NOTEST	0	0	0	0	1	1	no
Glyma01g32360	Glyma01g32360	Glyma01g32360	Gm01:43828911-43832736	14-13-0	14-13-14	NOTEST	0	0.0921472	1.79769e+308	1.79769e+308	0.0780415	1	no
Glyma01g32370	Glyma01g32370	Glyma01g32370	Gm01:43834206-43835697	14-13-0	14-13-14	OK	3.5116	2.60825	-0.42905	0.478265	0.632461	0.884053	no
Glyma01g32380	Glyma01g32380	Glyma01g32380	Gm01:43870379-43873398	14-13-0	14-13-14	OK	1.39093	3.6032	1.37323	-1.65695	0.0975305	0.345074	no
Glyma01g32390	Glyma01g32390	Glyma01g32390	Gm01:43912452-43917776	14-13-0	14-13-14	NOTEST	0.176967	0.176604	-0.00295792	0.00173307	0.998617	1	no
Glyma01g32400	Glyma01g32400	Glyma01g32400	Gm01:43922908-43926832	14-13-0	14-13-14	OK	5.08599	5.38668	0.0828685	-0.1148	0.908604	0.981622	no
Glyma01g32415	Glyma01g32415	Glyma01g32415	Gm01:43929164-43930175	14-13-0	14-13-14	NOTEST	0	0	0	0	1	1	no
Glyma01g32430	Glyma01g32430	Glyma01g32430	Gm01:43974483-43977133	14-13-0	14-13-14	OK	0.261232	1.4708	2.4932	-2.492	0.0127026	0.101998	no
Glyma01g32440	Glyma01g32440	Glyma01g32440	Gm01:43989758-43991730	14-13-0	14-13-14	OK	2.23104	4.05212	0.860961	-1.0664	0.286241	0.631176	no
Glyma01g32450	Glyma01g32450	Glyma01g32450	Gm01:44035709-44042969	14-13-0	14-13-14	OK	62.0747	1.84682	-5.07089	5.29429	1.19482e-07	1.38363e-05	yes
Glyma01g32460	Glyma01g32460	Glyma01g32460	Gm01:44035709-44042969	14-13-0	14-13-14	LOWDATA	0	0	-5.07089	0	1	1	no
Glyma01g32480	Glyma01g32480	Glyma01g32480	Gm01:44085644-44091881	14-13-0	14-13-14	NOTEST	0	0	0	0	1	1	no
Glyma01g32680	Glyma01g32680	Glyma01g32680	Gm01:44207946-44213690	14-13-0	14-13-14	OK	3.09337	0.620833	-2.3169	2.39722	0.0165199	0.120721	no
Glyma01g32690	Glyma01g32690	Glyma01g32690	Gm01:44229408-44236211	14-13-0	14-13-14	OK	6.43519	7.75626	0.269378	-0.372844	0.709265	0.917193	no
Glyma01g32750	Glyma01g32750	Glyma01g32750	Gm01:44319318-44320867	14-13-0	14-13-14	OK	2666.98	2380.58	-0.163891	0.080236	0.93605	0.988515	no
Glyma01g32760	Glyma01g32760	Glyma01g32760	Gm01:44347887-44349526	14-13-0	14-13-14	OK	0.101008	10.9669	6.76254	-5.0026	5.65618e-07	4.69684e-05	yes
Glyma01g32775	Glyma01g32775	Glyma01g32775	Gm01:44353224-44356977	14-13-0	14-13-14	NOTEST	0	0.151703	1.79769e+308	1.79769e+308	0.0610048	1	no
Glyma01g32790	Glyma01g32790	Glyma01g32790	Gm01:44365503-44368345	14-13-0	14-13-14	OK	3.7616	3.22743	-0.220962	0.278767	0.780424	0.944368	no
Glyma01g32800	Glyma01g32800	Glyma01g32800	Gm01:44381434-44383734	14-13-0	14-13-14	OK	0.622724	0.253891	-1.29438	1.05629	0.290838	0.636105	no
Glyma01g32810	Glyma01g32810	Glyma01g32810	Gm01:44384412-44392444	14-13-0	14-13-14	OK	0.525357	1.2371	1.23559	-1.30121	0.193187	0.514691	no
Glyma01g32825	Glyma01g32825	Glyma01g32825	Gm01:44418267-44430426	14-13-0	14-13-14	NOTEST	0	0.139449	1.79769e+308	1.79769e+308	0.0654322	1	no
Glyma01g32841	Glyma01g32841	Glyma01g32841	Gm01:44482207-44482737	14-13-0	14-13-14	OK	0	0.969997	1.79769e+308	1.79769e+308	0.0515363	0.235739	no
Glyma01g32855	Glyma01g32855	Glyma01g32855	Gm01:44489898-44494310	14-13-0	14-13-14	OK	0.126864	0.909352	2.84156	-2.364	0.0180788	0.128067	no
Glyma01g32870	Glyma01g32870	Glyma01g32870	Gm01:44497093-44498739	14-13-0	14-13-14	OK	20.0039	24.7251	0.305695	-0.416731	0.676875	0.903385	no
Glyma01g32881	Glyma01g32881	Glyma01g32881	Gm01:44501342-44502103	14-13-0	14-13-14	OK	2.65159	0.370729	-2.83842	2.2906	0.0219864	0.145217	no
Glyma01g32890	Glyma01g32890	Glyma01g32890	Gm01:44504750-44507253	14-13-0	14-13-14	OK	2.39845	0.455478	-2.39665	2.01172	0.0442499	0.215743	no
Glyma01g32900	Glyma01g32900	Glyma01g32900	Gm01:44534734-44540055	14-13-0	14-13-14	NOTEST	0	0	0	0	1	1	no
Glyma01g32920	Glyma01g32920	Glyma01g32920	Gm01:44562541-44564228	14-13-0	14-13-14	NOTEST	0.396213	0.197085	-1.00746	0.760016	0.447245	1	no
Glyma01g32940	Glyma01g32940	Glyma01g32940	Gm01:44595567-44597755	14-13-0	14-13-14	NOTEST	0	0	0	0	1	1	no
Glyma01g32961	Glyma01g32961	Glyma01g32961	Gm01:44638341-44639787	14-13-0	14-13-14	NOTEST	0	0	0	0	1	1	no
Glyma01g32981	Glyma01g32981	Glyma01g32981	Gm01:44662613-44664324	14-13-0	14-13-14	NOTEST	0.380602	0.280189	-0.441884	0.371851	0.710004	1	no
Glyma01g33000	Glyma01g33000	Glyma01g33000	Gm01:44707383-44712370	14-13-0	14-13-14	NOTEST	0.223241	0.376396	0.753653	-0.576871	0.564026	1	no
Glyma01g33017	Glyma01g33017	Glyma01g33017	Gm01:44713495-44722187	14-13-0	14-13-14	OK	5.89249	4.99988	-0.236984	0.314711	0.752981	0.93504	no
Glyma01g33034	Glyma01g33034	Glyma01g33034	Gm01:44713495-44722187	14-13-0	14-13-14	OK	0.619252	0.583694	-0.0853142	0.032526	0.974053	0.995669	no
Glyma01g33052	Glyma01g33052	Glyma01g33052	Gm01:44724345-44725089	14-13-0	14-13-14	NOTEST	0	0	0	0	1	1	no
Glyma01g33070	Glyma01g33070	Glyma01g33070	Gm01:44755155-44764276	14-13-0	14-13-14	NOTEST	0.366235	0.0287061	-3.67334	1.17494	0.240017	1	no
Glyma01g33080	Glyma01g33080	Glyma01g33080	Gm01:44784821-44785786	14-13-0	14-13-14	NOTEST	0	0	0	0	1	1	no
Glyma01g33097	Glyma01g33097	Glyma01g33097	Gm01:44790872-44791190	14-13-0	14-13-14	NOTEST	0	0	0	0	1	1	no
Glyma01g33114	Glyma01g33114	Glyma01g33114	Gm01:44806144-44806480	14-13-0	14-13-14	NOTEST	0	0	0	0	1	1	no
Glyma01g33132	Glyma01g33132	Glyma01g33132	Gm01:44822529-44827918	14-13-0	14-13-14	NOTEST	0	0	0	0	1	1	no
Glyma01g33150	Glyma01g33150	Glyma01g33150	Gm01:44831611-44835997	14-13-0	14-13-14	NOTEST	0.0383663	0.0384038	0.00141063	-0.000813689	0.999351	1	no
Glyma01g33160	Glyma01g33160	Glyma01g33160	Gm01:44884977-44888493	14-13-0	14-13-14	NOTEST	0	0	0	0	1	1	no
Glyma01g33170	Glyma01g33170	Glyma01g33170	Gm01:44905880-44910333	14-13-0	14-13-14	NOTEST	0	0.153404	1.79769e+308	1.79769e+308	0.0654322	1	no
Glyma01g33181	Glyma01g33181	Glyma01g33181	Gm01:44911452-44912574	14-13-0	14-13-14	NOTEST	0	0	0	0	1	1	no
Glyma01g33191	Glyma01g33191	Glyma01g33191	Gm01:44940045-44941190	14-13-0	14-13-14	NOTEST	0	0	0	0	1	1	no
Glyma01g33200	Glyma01g33200	Glyma01g33200	Gm01:44962980-44967133	14-13-0	14-13-14	OK	25.3056	7.77026	-1.70342	2.29382	0.0218011	0.144596	no
Glyma01g33220	Glyma01g33220	Glyma01g33220	Gm01:44980052-44984577	14-13-0	14-13-14	OK	7.1693	9.82323	0.454365	-0.61954	0.53556	0.830948	no
Glyma01g33240	Glyma01g33240	Glyma01g33240	Gm01:45046813-45053379	14-13-0	14-13-14	OK	6.7727	9.25845	0.451039	-0.619864	0.535347	0.830778	no
Glyma01g33270	Glyma01g33270	Glyma01g33270	Gm01:45164206-45167759	14-13-0	14-13-14	OK	10.2192	12.0088	0.232798	-0.310226	0.756389	0.936288	no
Glyma01g33281	Glyma01g33281	Glyma01g33281	Gm01:45184472-45185139	14-13-0	14-13-14	NOTEST	0	0	0	0	1	1	no
Glyma01g33290	Glyma01g33290	Glyma01g33290	Gm01:45230344-45235073	14-13-0	14-13-14	OK	5.47255	2.86855	-0.931892	1.2648	0.205942	0.530697	no
Glyma01g33300	Glyma01g33300	Glyma01g33300	Gm01:45287112-45288519	14-13-0	14-13-14	NOTEST	0	0.0670449	1.79769e+308	1.79769e+308	0.200203	1	no
Glyma01g33313	Glyma01g33313	Glyma01g33313	Gm01:45306250-45306442	14-13-0	14-13-14	NOTEST	0	0	0	0	1	1	no
Glyma01g33326	Glyma01g33326	Glyma01g33326	Gm01:45317460-45320741	14-13-0	14-13-14	NOTEST	0	0	0	0	1	1	no
Glyma01g33340	Glyma01g33340	Glyma01g33340	Gm01:45339891-45344677	14-13-0	14-13-14	OK	0.306191	1.06905	1.80383	-1.539	0.123804	0.397082	no
Glyma01g33350	Glyma01g33350	Glyma01g33350	Gm01:45352146-45354813	14-13-0	14-13-14	NOTEST	0	0	0	0	1	1	no
Glyma01g33370	Glyma01g33370	Glyma01g33370	Gm01:45401644-45404974	14-13-0	14-13-14	OK	0.293194	3.72726	3.66819	-3.40839	0.000653464	0.0118466	yes
Glyma01g33380	Glyma01g33380	Glyma01g33380	Gm01:45433046-45455133	14-13-0	14-13-14	OK	2.89424	3.70041	0.354504	-0.305905	0.759677	0.937945	no
Glyma01g33420	Glyma01g33420	Glyma01g33420	Gm01:45530801-45532165	14-13-0	14-13-14	NOTEST	0.277376	0.345341	0.316177	-0.254948	0.798763	1	no
Glyma01g33430	Glyma01g33430	Glyma01g33430	Gm01:45548731-45551079	14-13-0	14-13-14	NOTEST	0	0.106923	1.79769e+308	1.79769e+308	0.0878604	1	no
Glyma01g33440	Glyma01g33440	Glyma01g33440	Gm01:45561036-45565329	14-13-0	14-13-14	NOTEST	0.133127	0.069246	-0.943	0.68753	0.491749	1	no
Glyma01g33461	Glyma01g33461	Glyma01g33461	Gm01:45637083-45640786	14-13-0	14-13-14	NOTEST	0	0	0	0	1	1	no
Glyma01g33480	Glyma01g33480	Glyma01g33480	Gm01:45640951-45643255	14-13-0	14-13-14	NOTEST	0	0	0	0	1	1	no
Glyma01g33500	Glyma01g33500	Glyma01g33500	Gm01:45666010-45668198	14-13-0	14-13-14	NOTEST	0	0	0	0	1	1	no
Glyma01g33510	Glyma01g33510	Glyma01g33510	Gm01:45669204-45672362	14-13-0	14-13-14	NOTEST	0	0	0	0	1	1	no
Glyma01g33520	Glyma01g33520	Glyma01g33520	Gm01:45685075-45692774	14-13-0	14-13-14	OK	10.9309	7.45997	-0.551174	0.703737	0.481597	0.797815	no
Glyma01g33560	Glyma01g33560	Glyma01g33560	Gm01:45743456-45744317	14-13-0	14-13-14	NOTEST	0	0	0	0	1	1	no
Glyma01g33575	Glyma01g33575	Glyma01g33575	Gm01:45782142-45782607	14-13-0	14-13-14	NOTEST	0	0	0	0	1	1	no
Glyma01g33590	Glyma01g33590	Glyma01g33590	Gm01:45785878-45786501	14-13-0	14-13-14	NOTEST	0	0.311366	1.79769e+308	1.79769e+308	0.0878604	1	no
Glyma01g33600	Glyma01g33600	Glyma01g33600	Gm01:45786844-45790318	14-13-0	14-13-14	OK	6.06641	8.29386	0.4512	-0.538748	0.590061	0.86305	no
Glyma01g33610	Glyma01g33610	Glyma01g33610	Gm01:45796676-45800002	14-13-0	14-13-14	OK	7.15063	7.34165	0.0380337	-0.0523593	0.958242	0.992679	no
Glyma01g33620	Glyma01g33620	Glyma01g33620	Gm01:45803536-45806513	14-13-0	14-13-14	OK	0.979682	1.34815	0.460593	-0.44293	0.657816	0.895434	no
Glyma01g33635	Glyma01g33635	Glyma01g33635	Gm01:45827324-45830713	14-13-0	14-13-14	NOTEST	0	0	0	0	1	1	no
Glyma01g33650	Glyma01g33650	Glyma01g33650	Gm01:45852397-45854700	14-13-0	14-13-14	OK	2.90225	5.02904	0.79311	-1.05855	0.289806	0.63503	no
Glyma01g33660	Glyma01g33660	Glyma01g33660	Gm01:45858147-45867014	14-13-0	14-13-14	OK	24.2873	15.7698	-0.623037	0.791429	0.428694	0.760766	no
Glyma01g33676	Glyma01g33676	Glyma01g33676	Gm01:45892351-45898318	14-13-0	14-13-14	OK	2.09268	1.28295	-0.705888	0.808173	0.418991	0.752848	no
Glyma01g33692	Glyma01g33692	Glyma01g33692	Gm01:45905544-45906417	14-13-0	14-13-14	NOTEST	0	0	0	0	1	1	no
Glyma01g33708	Glyma01g33708	Glyma01g33708	Gm01:45911622-45912362	14-13-0	14-13-14	NOTEST	0	0	0	0	1	1	no
Glyma01g33724	Glyma01g33724	Glyma01g33724	Gm01:45932771-45933893	14-13-0	14-13-14	OK	6.41095	3.7344	-0.779662	0.963305	0.335395	0.682782	no
Glyma01g33740	Glyma01g33740	Glyma01g33740	Gm01:45948913-45964890	14-13-0	14-13-14	NOTEST	0	0	0	0	1	1	no
Glyma01g33761	Glyma01g33761	Glyma01g33761	Gm01:45948913-45964890	14-13-0	14-13-14	OK	5.10413	2.60753	-0.968982	1.12729	0.259619	0.599677	no
Glyma01g33782	Glyma01g33782	Glyma01g33782	Gm01:45948913-45964890	14-13-0	14-13-14	NOTEST	0	0.0415781	1.79769e+308	1.79769e+308	0.411532	1	no
Glyma01g33803	Glyma01g33803	Glyma01g33803	Gm01:45990835-45994797	14-13-0	14-13-14	NOTEST	0	0	0	0	1	1	no
Glyma01g33824	Glyma01g33824	Glyma01g33824	Gm01:46002247-46005198	14-13-0	14-13-14	NOTEST	0	0	0	0	1	1	no
Glyma01g33845	Glyma01g33845	Glyma01g33845	Gm01:46007636-46011913	14-13-0	14-13-14	NOTEST	0	0.0191006	1.79769e+308	1.79769e+308	0.200203	1	no
Glyma01g33866	Glyma01g33866	Glyma01g33866	Gm01:46043835-46074615	14-13-0	14-13-14	OK	6.26213	4.55431	-0.459422	0.566401	0.571121	0.852719	no
Glyma01g33888	Glyma01g33888	Glyma01g33888	Gm01:46096266-46097858	14-13-0	14-13-14	NOTEST	0	0	0	0	1	1	no
Glyma01g33910	Glyma01g33910	Glyma01g33910	Gm01:46103382-46104985	14-13-0	14-13-14	NOTEST	0.196263	0.0671774	-1.54674	0.999393	0.317605	1	no
Glyma01g33920	Glyma01g33920	Glyma01g33920	Gm01:46115248-46117119	14-13-0	14-13-14	NOTEST	0	0	0	0	1	1	no
Glyma01g33960	Glyma01g33960	Glyma01g33960	Gm01:46237540-46239330	14-13-0	14-13-14	NOTEST	0	0	0	0	1	1	no
Glyma01g33986	Glyma01g33986	Glyma01g33986	Gm01:46305207-46307924	14-13-0	14-13-14	NOTEST	0	0	0	0	1	1	no
Glyma01g34013	Glyma01g34013	Glyma01g34013	Gm01:46321601-46322033	14-13-0	14-13-14	NOTEST	0	0	0	0	1	1	no
Glyma01g34040	Glyma01g34040	Glyma01g34040	Gm01:46325425-46325842	14-13-0	14-13-14	NOTEST	0	0	0	0	1	1	no
Glyma01g34060	Glyma01g34060	Glyma01g34060	Gm01:46360579-46360996	14-13-0	14-13-14	NOTEST	0	0	0	0	1	1	no
Glyma01g34111	Glyma01g34111	Glyma01g34111	Gm01:46405622-46406054	14-13-0	14-13-14	NOTEST	0	0	0	0	1	1	no
Glyma01g34160	Glyma01g34160	Glyma01g34160	Gm01:46426795-46427518	14-13-0	14-13-14	NOTEST	0	0	0	0	1	1	no
Glyma01g34180	Glyma01g34180	Glyma01g34180	Gm01:46434724-46435093	14-13-0	14-13-14	NOTEST	0	0	0	0	1	1	no
Glyma01g34210	Glyma01g34210	Glyma01g34210	Gm01:46467747-46468471	14-13-0	14-13-14	NOTEST	0	0	0	0	1	1	no
Glyma01g34223	Glyma01g34223	Glyma01g34223	Gm01:46519589-46520799	14-13-0	14-13-14	NOTEST	0	0	0	0	1	1	no
Glyma01g34236	Glyma01g34236	Glyma01g34236	Gm01:46527137-46531737	14-13-0	14-13-14	OK	0.743109	0.11514	-2.69019	1.93511	0.0529763	0.239335	no
Glyma01g34250	Glyma01g34250	Glyma01g34250	Gm01:46534521-46534953	14-13-0	14-13-14	NOTEST	0	0	0	0	1	1	no
Glyma01g34260	Glyma01g34260	Glyma01g34260	Gm01:46537220-46537655	14-13-0	14-13-14	NOTEST	0	0	0	0	1	1	no
Glyma01g34270	Glyma01g34270	Glyma01g34270	Gm01:46573515-46583536	14-13-0	14-13-14	OK	7.10465	7.09247	-0.00247498	0.0033618	0.997318	0.999828	no
Glyma01g34300	Glyma01g34300	Glyma01g34300	Gm01:46676161-46677711	14-13-0	14-13-14	OK	332.567	1.25875	-8.0455	6.77616	1.23408e-11	1.04407e-08	yes
Glyma01g34321	Glyma01g34321	Glyma01g34321	Gm01:46693841-46694273	14-13-0	14-13-14	NOTEST	0	0	0	0	1	1	no
Glyma01g34340	Glyma01g34340	Glyma01g34340	Gm01:46707889-46726051	14-13-0	14-13-14	NOTEST	0	0	0	0	1	1	no
Glyma01g34350	Glyma01g34350	Glyma01g34350	Gm01:46731685-46740931	14-13-0	14-13-14	OK	3.39746	2.26738	-0.583432	0.703438	0.481783	0.797961	no
Glyma01g34360	Glyma01g34360	Glyma01g34360	Gm01:46742637-46747004	14-13-0	14-13-14	OK	0.177413	1.77389	3.32173	-2.24321	0.0248834	0.155789	no
Glyma01g34370	Glyma01g34370	Glyma01g34370	Gm01:46749398-46751642	14-13-0	14-13-14	NOTEST	0.141986	0.0701303	-1.01764	0.48094	0.630559	1	no
Glyma01g34380	Glyma01g34380	Glyma01g34380	Gm01:46754477-46758976	14-13-0	14-13-14	OK	1.21619	2.46041	1.01653	-0.988228	0.323041	0.669605	no
Glyma01g34400	Glyma01g34400	Glyma01g34400	Gm01:46763231-46763483	14-13-0	14-13-14	OK	22.0568	0	-1.79769e+308	-1.79769e+308	0.0424427	0.210489	no
Glyma01g34410	Glyma01g34410	Glyma01g34410	Gm01:46764767-46772182	14-13-0	14-13-14	OK	2.48697	11.6749	2.23095	-2.32535	0.0200533	0.137344	no
Glyma01g34420	Glyma01g34420	Glyma01g34420	Gm01:46787052-46789561	14-13-0	14-13-14	NOTEST	0	0.0590094	1.79769e+308	1.79769e+308	0.117179	1	no
Glyma01g34443	Glyma01g34443	Glyma01g34443	Gm01:46808690-46811728	14-13-0	14-13-14	NOTEST	0	0	0	0	1	1	no
Glyma01g34466	Glyma01g34466	Glyma01g34466	Gm01:46825911-46827713	14-13-0	14-13-14	NOTEST	0	0	0	0	1	1	no
Glyma01g34490	Glyma01g34490	Glyma01g34490	Gm01:46835873-46838757	14-13-0	14-13-14	NOTEST	0.0794931	0	-1.79769e+308	-1.79769e+308	0.122021	1	no
Glyma01g34506	Glyma01g34506	Glyma01g34506	Gm01:46869789-46881811	14-13-0	14-13-14	OK	1.54364	3.08949	1.00104	-1.18829	0.234721	0.569004	no
Glyma01g34523	Glyma01g34523	Glyma01g34523	Gm01:46869789-46881811	14-13-0	14-13-14	OK	0.110488	0.47577	2.10637	-0.342847	0.731714	0.926059	no
Glyma01g34540	Glyma01g34540	Glyma01g34540	Gm01:46906412-46911701	14-13-0	14-13-14	NOTEST	0.203419	0.182469	-0.15681	0.11967	0.904744	1	no
Glyma01g34560	Glyma01g34560	Glyma01g34560	Gm01:46925228-46938022	14-13-0	14-13-14	OK	1.4205	2.44304	0.782283	-0.873028	0.382648	0.723636	no
Glyma01g34570	Glyma01g34570	Glyma01g34570	Gm01:46940993-46942519	14-13-0	14-13-14	NOTEST	0	0.0534586	1.79769e+308	1.79769e+308	0.117179	1	no
Glyma01g34580	Glyma01g34580	Glyma01g34580	Gm01:46987337-46989392	14-13-0	14-13-14	NOTEST	0	0.0534882	1.79769e+308	1.79769e+308	0.117179	1	no
Glyma01g34590	Glyma01g34590	Glyma01g34590	Gm01:46994947-47011742	14-13-0	14-13-14	OK	0.0796743	2.10183	4.72138	-4.4261	9.59523e-06	0.000449971	yes
Glyma01g34605	Glyma01g34605	Glyma01g34605	Gm01:47017352-47017572	14-13-0	14-13-14	NOTEST	0	0	0	0	1	1	no
Glyma01g34620	Glyma01g34620	Glyma01g34620	Gm01:47044532-47046263	14-13-0	14-13-14	NOTEST	0	0.15954	1.79769e+308	1.79769e+308	0.0780415	1	no
Glyma01g34630	Glyma01g34630	Glyma01g34630	Gm01:47059946-47069275	14-13-0	14-13-14	OK	13.7154	5.97845	-1.19796	1.47296	0.140761	0.429616	no
Glyma01g34650	Glyma01g34650	Glyma01g34650	Gm01:47081810-47085604	14-13-0	14-13-14	OK	0.151886	0.818848	2.43061	-1.62099	0.105019	0.360612	no
Glyma01g34660	Glyma01g34660	Glyma01g34660	Gm01:47090148-47094163	14-13-0	14-13-14	OK	21.1153	16.6076	-0.346444	0.477457	0.633037	0.884236	no
Glyma01g34671	Glyma01g34671	Glyma01g34671	Gm01:47112164-47117514	14-13-0	14-13-14	NOTEST	0	0	0	0	1	1	no
Glyma01g34680	Glyma01g34680	Glyma01g34680	Gm01:47129774-47133165	14-13-0	14-13-14	OK	2.66442	0.231995	-3.52165	2.89082	0.00384235	0.0449696	yes
Glyma01g34690	Glyma01g34690	Glyma01g34690	Gm01:47136977-47141477	14-13-0	14-13-14	OK	8.43178	4.94935	-0.768597	0.819931	0.412255	0.74785	no
Glyma01g34700	Glyma01g34700	Glyma01g34700	Gm01:47141945-47148729	14-13-0	14-13-14	OK	221.834	42.6665	-2.3783	1.65047	0.0988463	0.348008	no
Glyma01g34710	Glyma01g34710	Glyma01g34710	Gm01:47159471-47160816	14-13-0	14-13-14	NOTEST	0	0	0	0	1	1	no
Glyma01g34723	Glyma01g34723	Glyma01g34723	Gm01:47186498-47195065	14-13-0	14-13-14	NOTEST	0	0	0	0	1	1	no
Glyma01g34736	Glyma01g34736	Glyma01g34736	Gm01:47186498-47195065	14-13-0	14-13-14	NOTEST	0	0	0	0	1	1	no
Glyma01g34750	Glyma01g34750	Glyma01g34750	Gm01:47186498-47195065	14-13-0	14-13-14	NOTEST	0	0	0	0	1	1	no
Glyma01g34760	Glyma01g34760	Glyma01g34760	Gm01:47218316-47222203	14-13-0	14-13-14	NOTEST	0	0	0	0	1	1	no
Glyma01g34770	Glyma01g34770	Glyma01g34770	Gm01:47223841-47226695	14-13-0	14-13-14	NOTEST	0	0	0	0	1	1	no
Glyma01g34780	Glyma01g34780	Glyma01g34780	Gm01:47252139-47259720	14-13-0	14-13-14	OK	9.63821	7.69232	-0.325347	0.394323	0.693343	0.910309	no
Glyma01g34791	Glyma01g34791	Glyma01g34791	Gm01:47272202-47272649	14-13-0	14-13-14	NOTEST	0	0	0	0	1	1	no
Glyma01g34800	Glyma01g34800	Glyma01g34800	Gm01:47276056-47279637	14-13-0	14-13-14	NOTEST	0.343699	0.0851507	-2.01306	1.46475	0.142989	1	no
Glyma01g34820	Glyma01g34820	Glyma01g34820	Gm01:47295116-47298579	14-13-0	14-13-14	OK	9.30661	13.0834	0.491406	-0.662106	0.507903	0.81305	no
Glyma01g34830	Glyma01g34830	Glyma01g34830	Gm01:47301280-47303164	14-13-0	14-13-14	OK	0.270615	0.480327	0.827776	-0.712362	0.476241	0.795003	no
Glyma01g34840	Glyma01g34840	Glyma01g34840	Gm01:47306519-47315257	14-13-0	14-13-14	OK	5.59114	2.79801	-0.998743	1.37416	0.169393	0.478047	no
Glyma01g34890	Glyma01g34890	Glyma01g34890	Gm01:47380345-47383987	14-13-0	14-13-14	NOTEST	0	0	0	0	1	1	no
Glyma01g34930	Glyma01g34930	Glyma01g34930	Gm01:47416768-47417287	14-13-0	14-13-14	NOTEST	0	0	0	0	1	1	no
Glyma01g34940	Glyma01g34940	Glyma01g34940	Gm01:47418176-47422790	14-13-0	14-13-14	NOTEST	0.10558	0.157931	0.58096	-0.405247	0.685296	1	no
Glyma01g34950	Glyma01g34950	Glyma01g34950	Gm01:47484620-47488243	14-13-0	14-13-14	NOTEST	0.0501609	0.0222233	-1.17449	0.104806	0.91653	1	no
Glyma01g34960	Glyma01g34960	Glyma01g34960	Gm01:47484620-47488243	14-13-0	14-13-14	OK	0.535496	0.491734	-0.122997	0.0941968	0.924953	0.986189	no
Glyma01g34971	Glyma01g34971	Glyma01g34971	Gm01:47509796-47513893	14-13-0	14-13-14	NOTEST	0	0	0	0	1	1	no
Glyma01g34980	Glyma01g34980	Glyma01g34980	Gm01:47515002-47518685	14-13-0	14-13-14	OK	3.67349	2.25469	-0.704225	0.920509	0.357307	0.702204	no
Glyma01g34990	Glyma01g34990	Glyma01g34990	Gm01:47519487-47522901	14-13-0	14-13-14	OK	0.811974	1.78786	1.13873	-1.06429	0.287197	0.632303	no
Glyma01g35010	Glyma01g35010	Glyma01g35010	Gm01:47557393-47559050	14-13-0	14-13-14	OK	1.47661	2.41287	0.708455	-0.753279	0.451282	0.778652	no
Glyma01g35030	Glyma01g35030	Glyma01g35030	Gm01:47605850-47609703	14-13-0	14-13-14	OK	28.5153	7.9542	-1.84195	2.45337	0.0141525	0.109529	no
Glyma01g35043	Glyma01g35043	Glyma01g35043	Gm01:47610784-47630469	14-13-0	14-13-14	OK	5.88071	3.24411	-0.85817	0.997606	0.31847	0.665315	no
Glyma01g35056	Glyma01g35056	Glyma01g35056	Gm01:47635648-47638176	14-13-0	14-13-14	NOTEST	0	0	0	0	1	1	no
Glyma01g35070	Glyma01g35070	Glyma01g35070	Gm01:47640057-47641838	14-13-0	14-13-14	NOTEST	0	0	0	0	1	1	no
Glyma01g35083	Glyma01g35083	Glyma01g35083	Gm01:47647068-47659579	14-13-0	14-13-14	OK	5.08601	5.76336	0.180374	-0.238802	0.811259	0.954096	no
Glyma01g35096	Glyma01g35096	Glyma01g35096	Gm01:47647068-47659579	14-13-0	14-13-14	OK	0.711404	0.442278	-0.685717	0.281009	0.778703	0.94394	no
Glyma01g35110	Glyma01g35110	Glyma01g35110	Gm01:47674344-47678727	14-13-0	14-13-14	OK	2.47378	3.85931	0.641627	-0.721308	0.47072	0.791341	no
Glyma01g35120	Glyma01g35120	Glyma01g35120	Gm01:47680344-47682544	14-13-0	14-13-14	NOTEST	0	0	0	0	1	1	no
Glyma01g35130	Glyma01g35130	Glyma01g35130	Gm01:47684337-47693236	14-13-0	14-13-14	OK	18.8275	17.1318	-0.136165	0.177699	0.858959	0.968911	no
Glyma01g35145	Glyma01g35145	Glyma01g35145	Gm01:47696213-47700220	14-13-0	14-13-14	OK	2.98167	2.57038	-0.214142	0.25387	0.799596	0.950845	no
Glyma01g35160	Glyma01g35160	Glyma01g35160	Gm01:47703725-47705225	14-13-0	14-13-14	OK	0.707154	1.54564	1.12811	-1.06086	0.288753	0.634292	no
Glyma01g35170	Glyma01g35170	Glyma01g35170	Gm01:47707392-47708756	14-13-0	14-13-14	OK	7.82625	17.2214	1.13781	-1.5282	0.126462	0.402237	no
Glyma01g35180	Glyma01g35180	Glyma01g35180	Gm01:47718336-47725678	14-13-0	14-13-14	OK	0.192457	0.760184	1.98181	-1.42397	0.154454	0.453239	no
Glyma01g35190	Glyma01g35190	Glyma01g35190	Gm01:47727548-47732948	14-13-0	14-13-14	OK	37.6678	24.1145	-0.643429	0.770219	0.44117	0.771166	no
Glyma01g35201	Glyma01g35201	Glyma01g35201	Gm01:47733363-47734311	14-13-0	14-13-14	OK	5.01494	4.08212	-0.296914	0.232645	0.816037	0.95505	no
Glyma01g35211	Glyma01g35211	Glyma01g35211	Gm01:47738908-47740460	14-13-0	14-13-14	NOTEST	0	0	0	0	1	1	no
Glyma01g35220	Glyma01g35220	Glyma01g35220	Gm01:47744055-47749293	14-13-0	14-13-14	OK	54.2812	40.0818	-0.437507	0.349329	0.726843	0.923998	no
Glyma01g35230	Glyma01g35230	Glyma01g35230	Gm01:47776150-47780905	14-13-0	14-13-14	OK	13.1596	6.35489	-1.05017	1.42393	0.154466	0.453239	no
Glyma01g35255	Glyma01g35255	Glyma01g35255	Gm01:47796276-47802389	14-13-0	14-13-14	NOTEST	0.0277701	0.123843	2.1569	-1.40962	0.158652	1	no
Glyma01g35280	Glyma01g35280	Glyma01g35280	Gm01:47816224-47821828	14-13-0	14-13-14	OK	100.603	26.8856	-1.90376	2.21666	0.0266463	0.162673	no
Glyma01g35291	Glyma01g35291	Glyma01g35291	Gm01:47825541-47831516	14-13-0	14-13-14	OK	0.888067	1.04662	0.237004	-0.208982	0.834462	0.961517	no
Glyma01g35300	Glyma01g35300	Glyma01g35300	Gm01:47832148-47834125	14-13-0	14-13-14	OK	5.59453	7.13374	0.350642	-0.460516	0.645146	0.88989	no
Glyma01g35310	Glyma01g35310	Glyma01g35310	Gm01:47838176-47839418	14-13-0	14-13-14	OK	0	0.856451	1.79769e+308	1.79769e+308	0.0328834	0.182426	no
Glyma01g35315	Glyma01g35315	Glyma01g35315	Gm01:47840273-47842107	14-13-0	14-13-14	NOTEST	0	0.258633	1.79769e+308	1.79769e+308	0.0654322	1	no
Glyma01g35320	Glyma01g35320	Glyma01g35320	Gm01:47843480-47846444	14-13-0	14-13-14	OK	13.6127	13.4306	-0.0194388	0.0264238	0.978919	0.996659	no
Glyma01g35330	Glyma01g35330	Glyma01g35330	Gm01:47852135-47854503	14-13-0	14-13-14	OK	5.03902	1.98111	-1.34683	1.68079	0.092803	0.334629	no
Glyma01g35360	Glyma01g35360	Glyma01g35360	Gm01:47868564-47871498	14-13-0	14-13-14	OK	29.7053	19.8975	-0.578134	0.762102	0.445999	0.775531	no
Glyma01g35370	Glyma01g35370	Glyma01g35370	Gm01:47876579-47879048	14-13-0	14-13-14	OK	5.44001	4.36985	-0.316027	0.424711	0.671047	0.900389	no
Glyma01g35381	Glyma01g35381	Glyma01g35381	Gm01:47882778-47885490	14-13-0	14-13-14	OK	11.0827	9.01888	-0.297287	0.359761	0.719026	0.920785	no
Glyma01g35390	Glyma01g35390	Glyma01g35390	Gm01:47891482-47901268	14-13-0	14-13-14	OK	14.069	19.7202	0.487158	-0.622619	0.533535	0.829295	no
Glyma01g35400	Glyma01g35400	Glyma01g35400	Gm01:47904409-47909019	14-13-0	14-13-14	OK	1.41574	1.4276	0.0120311	-0.0123491	0.990147	0.998255	no
Glyma01g35410	Glyma01g35410	Glyma01g35410	Gm01:47910023-47911708	14-13-0	14-13-14	OK	0.0434855	0.532136	3.61319	-2.45527	0.014078	0.10918	no
Glyma01g35420	Glyma01g35420	Glyma01g35420	Gm01:47912898-47913228	14-13-0	14-13-14	OK	0.641279	0	-1.79769e+308	-1.79769e+308	0.122021	0.393515	no
Glyma01g35430	Glyma01g35430	Glyma01g35430	Gm01:47926149-47931104	14-13-0	14-13-14	NOTEST	0.12134	0.231034	0.929045	-0.715408	0.474357	1	no
Glyma01g35440	Glyma01g35440	Glyma01g35440	Gm01:47932186-47933647	14-13-0	14-13-14	NOTEST	0.161668	0.0275656	-2.55209	1.29779	0.194358	1	no
Glyma01g35450	Glyma01g35450	Glyma01g35450	Gm01:47933912-47939040	14-13-0	14-13-14	OK	23.4834	2.14875	-3.45007	4.15967	3.18708e-05	0.00114788	yes
Glyma01g35460	Glyma01g35460	Glyma01g35460	Gm01:47946562-47947368	14-13-0	14-13-14	OK	5.48745	1.06059	-2.37128	2.27184	0.0230962	0.149459	no
Glyma01g35470	Glyma01g35470	Glyma01g35470	Gm01:47950106-47953985	14-13-0	14-13-14	OK	1.4218	0.790233	-0.847373	0.761598	0.4463	0.775682	no
Glyma01g35480	Glyma01g35480	Glyma01g35480	Gm01:47964085-47972060	14-13-0	14-13-14	OK	3.32671	3.92526	0.238693	-0.24375	0.807425	0.952514	no
Glyma01g35490	Glyma01g35490	Glyma01g35490	Gm01:47975124-47980649	14-13-0	14-13-14	OK	2.72196	4.25221	0.64357	-0.865434	0.386801	0.727334	no
Glyma01g35500	Glyma01g35500	Glyma01g35500	Gm01:47984869-47990016	14-13-0	14-13-14	OK	0.535143	0.702783	0.393154	-0.366111	0.714282	0.91894	no
Glyma01g35510	Glyma01g35510	Glyma01g35510	Gm01:47990548-47991258	14-13-0	14-13-14	OK	0.560048	0.723896	0.370232	-0.279086	0.780179	0.944368	no
Glyma01g35530	Glyma01g35530	Glyma01g35530	Gm01:48002890-48006714	14-13-0	14-13-14	NOTEST	0.0445269	0.432556	3.28014	-2.21117	0.0270242	1	no
Glyma01g35540	Glyma01g35540	Glyma01g35540	Gm01:48012025-48020478	14-13-0	14-13-14	OK	1.07753	5.31234	2.30162	-2.55137	0.01073	0.0910281	no
Glyma01g35551	Glyma01g35551	Glyma01g35551	Gm01:48045791-48046532	14-13-0	14-13-14	OK	0.524267	1.06911	1.02804	-0.795753	0.426176	0.758523	no
Glyma01g35561	Glyma01g35561	Glyma01g35561	Gm01:48046627-48048949	14-13-0	14-13-14	NOTEST	0	0.191069	1.79769e+308	1.79769e+308	0.0515363	1	no
Glyma01g35570	Glyma01g35570	Glyma01g35570	Gm01:48069521-48070621	14-13-0	14-13-14	OK	3.22389	1.15068	-1.48631	1.37828	0.168118	0.476212	no
Glyma01g35580	Glyma01g35580	Glyma01g35580	Gm01:48077865-48083725	14-13-0	14-13-14	OK	1.73323	0.873414	-0.988725	0.875022	0.381562	0.722777	no
Glyma01g35590	Glyma01g35590	Glyma01g35590	Gm01:48086193-48086883	14-13-0	14-13-14	OK	0.124154	1.14311	3.20276	-2.15048	0.0315169	0.17876	no
Glyma01g35600	Glyma01g35600	Glyma01g35600	Gm01:48088646-48092573	14-13-0	14-13-14	OK	6.11414	2.58451	-1.24226	1.42659	0.153697	0.452272	no
Glyma01g35611	Glyma01g35611	Glyma01g35611	Gm01:48106435-48107149	14-13-0	14-13-14	NOTEST	0	0	0	0	1	1	no
Glyma01g35620	Glyma01g35620	Glyma01g35620	Gm01:48132072-48139955	14-13-0	14-13-14	OK	90.6602	1.09378	-6.37307	6.14657	7.91771e-10	2.59198e-07	yes
Glyma01g35630	Glyma01g35630	Glyma01g35630	Gm01:48142117-48144321	14-13-0	14-13-14	OK	0.696491	1.97444	1.50327	-1.42931	0.152914	0.451143	no
Glyma01g35640	Glyma01g35640	Glyma01g35640	Gm01:48145384-48152470	14-13-0	14-13-14	OK	1.01304	1.35606	0.420726	-0.44245	0.658164	0.895526	no
Glyma01g35650	Glyma01g35650	Glyma01g35650	Gm01:48157272-48165868	14-13-0	14-13-14	OK	5.18154	2.60506	-0.992063	1.35761	0.174588	0.48736	no
Glyma01g35660	Glyma01g35660	Glyma01g35660	Gm01:48174704-48177832	14-13-0	14-13-14	OK	0.710606	4.39193	2.62773	-2.82115	0.00478515	0.0521662	no
Glyma01g35671	Glyma01g35671	Glyma01g35671	Gm01:48220843-48221643	14-13-0	14-13-14	OK	38.5627	15.5015	-1.3148	1.74498	0.0809884	0.307463	no
Glyma01g35681	Glyma01g35681	Glyma01g35681	Gm01:48221730-48222524	14-13-0	14-13-14	NOTEST	0	0	0	0	1	1	no
Glyma01g35690	Glyma01g35690	Glyma01g35690	Gm01:48227988-48235632	14-13-0	14-13-14	OK	0.977813	3.72231	1.92857	-2.19091	0.0284584	0.16912	no
Glyma01g35700	Glyma01g35700	Glyma01g35700	Gm01:48235761-48238962	14-13-0	14-13-14	NOTEST	0.118933	0.129414	0.121846	-0.0976989	0.922171	1	no
Glyma01g35711	Glyma01g35711	Glyma01g35711	Gm01:48242478-48244212	14-13-0	14-13-14	NOTEST	0	0	0	0	1	1	no
Glyma01g35720	Glyma01g35720	Glyma01g35720	Gm01:48246126-48248948	14-13-0	14-13-14	NOTEST	0	0.118141	1.79769e+308	1.79769e+308	0.0780415	1	no
Glyma01g35730	Glyma01g35730	Glyma01g35730	Gm01:48251598-48253821	14-13-0	14-13-14	OK	1.27578	0.564071	-1.17743	1.02753	0.304173	0.650612	no
Glyma01g35740	Glyma01g35740	Glyma01g35740	Gm01:48256233-48258418	14-13-0	14-13-14	OK	1.93535	0.302149	-2.67926	2.29802	0.0215609	0.143793	no
Glyma01g35750	Glyma01g35750	Glyma01g35750	Gm01:48262136-48265375	14-13-0	14-13-14	OK	11.1657	11.3998	0.0299379	-0.0415786	0.966835	0.994153	no
Glyma01g35780	Glyma01g35780	Glyma01g35780	Gm01:48276784-48278711	14-13-0	14-13-14	OK	13.5841	13.3575	-0.0242681	0.0299948	0.976071	0.996161	no
Glyma01g35790	Glyma01g35790	Glyma01g35790	Gm01:48279936-48284217	14-13-0	14-13-14	OK	7.29154	5.55765	-0.391749	0.543336	0.586898	0.86159	no
Glyma01g35800	Glyma01g35800	Glyma01g35800	Gm01:48289113-48292398	14-13-0	14-13-14	OK	1.02326	0.879209	-0.2189	0.225477	0.821608	0.957508	no
Glyma01g35820	Glyma01g35820	Glyma01g35820	Gm01:48321786-48329293	14-13-0	14-13-14	OK	0.913575	1.79409	0.973658	-1.06464	0.287041	0.6323	no
Glyma01g35830	Glyma01g35830	Glyma01g35830	Gm01:48330613-48331119	14-13-0	14-13-14	NOTEST	0	0	0	0	1	1	no
Glyma01g35840	Glyma01g35840	Glyma01g35840	Gm01:48332060-48333217	14-13-0	14-13-14	OK	1.48345	3.46669	1.2246	-1.21333	0.225004	0.55531	no
Glyma01g35850	Glyma01g35850	Glyma01g35850	Gm01:48334976-48338851	14-13-0	14-13-14	OK	4.37246	5.46306	0.321264	-0.446016	0.655586	0.894843	no
Glyma01g35880	Glyma01g35880	Glyma01g35880	Gm01:48348796-48349428	14-13-0	14-13-14	NOTEST	0	0	0	0	1	1	no
Glyma01g35910	Glyma01g35910	Glyma01g35910	Gm01:48361827-48364787	14-13-0	14-13-14	OK	219.495	54.0164	-2.02272	1.62915	0.103282	0.357387	no
Glyma01g35920	Glyma01g35920	Glyma01g35920	Gm01:48373909-48375181	14-13-0	14-13-14	OK	3.62307	2.763	-0.390974	0.43264	0.665276	0.898351	no
Glyma01g35931	Glyma01g35931	Glyma01g35931	Gm01:48376295-48378301	14-13-0	14-13-14	NOTEST	0	0	0	0	1	1	no
Glyma01g35940	Glyma01g35940	Glyma01g35940	Gm01:48378830-48383355	14-13-0	14-13-14	OK	1.77293	4.25432	1.26279	-1.59102	0.111606	0.375023	no
Glyma01g35950	Glyma01g35950	Glyma01g35950	Gm01:48392038-48401536	14-13-0	14-13-14	OK	2.72469	6.29513	1.20814	-1.64592	0.0997796	0.349819	no
Glyma01g35960	Glyma01g35960	Glyma01g35960	Gm01:48412616-48415065	14-13-0	14-13-14	NOTEST	0	0.0300764	1.79769e+308	1.79769e+308	0.200203	1	no
Glyma01g35970	Glyma01g35970	Glyma01g35970	Gm01:48419129-48422033	14-13-0	14-13-14	NOTEST	0	0	0	0	1	1	no
Glyma01g35980	Glyma01g35980	Glyma01g35980	Gm01:48422961-48427391	14-13-0	14-13-14	OK	0.589125	0.966755	0.714577	-0.717891	0.472825	0.792995	no
Glyma01g35990	Glyma01g35990	Glyma01g35990	Gm01:48439916-48441659	14-13-0	14-13-14	OK	4.09956	3.40142	-0.269333	0.313906	0.753593	0.935176	no
Glyma01g36000	Glyma01g36000	Glyma01g36000	Gm01:48442886-48447854	14-13-0	14-13-14	OK	1.64776	2.15084	0.384387	-0.470547	0.637964	0.886862	no
Glyma01g36011	Glyma01g36011	Glyma01g36011	Gm01:48469240-48475758	14-13-0	14-13-14	OK	2.01105	2.21913	0.142047	-0.153931	0.877664	0.973838	no
Glyma01g36021	Glyma01g36021	Glyma01g36021	Gm01:48476497-48478317	14-13-0	14-13-14	NOTEST	0	0	0	0	1	1	no
Glyma01g36030	Glyma01g36030	Glyma01g36030	Gm01:48481465-48486456	14-13-0	14-13-14	OK	8.96548	2.43263	-1.88187	1.8206	0.0686673	0.279197	no
Glyma01g36040	Glyma01g36040	Glyma01g36040	Gm01:48503695-48509106	14-13-0	14-13-14	OK	2.24454	3.70071	0.721383	-0.910824	0.362388	0.706744	no
Glyma01g36050	Glyma01g36050	Glyma01g36050	Gm01:48515192-48516090	14-13-0	14-13-14	NOTEST	0.0980234	0.342385	1.80442	-1.16376	0.244521	1	no
Glyma01g36070	Glyma01g36070	Glyma01g36070	Gm01:48524087-48529043	14-13-0	14-13-14	OK	15.6029	8.32521	-0.906254	1.23283	0.21764	0.545789	no
Glyma01g36080	Glyma01g36080	Glyma01g36080	Gm01:48537766-48542585	14-13-0	14-13-14	OK	1.98102	7.62432	1.94437	-2.47416	0.0133551	0.105252	no
Glyma01g36091	Glyma01g36091	Glyma01g36091	Gm01:48559460-48570512	14-13-0	14-13-14	OK	0.199427	0.786123	1.9789	-1.65356	0.0982179	0.346673	no
Glyma01g36101	Glyma01g36101	Glyma01g36101	Gm01:48579414-48580534	14-13-0	14-13-14	NOTEST	0	0	0	0	1	1	no
Glyma01g36110	Glyma01g36110	Glyma01g36110	Gm01:48584816-48588333	14-13-0	14-13-14	OK	6.72911	13.3881	0.992465	-1.32627	0.184751	0.502123	no
Glyma01g36120	Glyma01g36120	Glyma01g36120	Gm01:48599418-48603933	14-13-0	14-13-14	OK	4.52947	2.31366	-0.969167	1.11146	0.266369	0.608128	no
Glyma01g36130	Glyma01g36130	Glyma01g36130	Gm01:48622283-48624709	14-13-0	14-13-14	NOTEST	0	0	0	0	1	1	no
Glyma01g36145	Glyma01g36145	Glyma01g36145	Gm01:48632045-48636339	14-13-0	14-13-14	OK	1.39278	3.97165	1.51177	-1.61257	0.106839	0.364435	no
Glyma01g36160	Glyma01g36160	Glyma01g36160	Gm01:48651554-48653174	14-13-0	14-13-14	OK	6.17282	8.88055	0.524719	-0.723145	0.469591	0.790497	no
Glyma01g36170	Glyma01g36170	Glyma01g36170	Gm01:48661585-48668062	14-13-0	14-13-14	OK	3.8902	3.23314	-0.266908	0.353131	0.72399	0.92263	no
Glyma01g36180	Glyma01g36180	Glyma01g36180	Gm01:48677503-48687090	14-13-0	14-13-14	OK	2.6676	4.59965	0.785983	-0.839801	0.40102	0.738806	no
Glyma01g36190	Glyma01g36190	Glyma01g36190	Gm01:48690497-48697620	14-13-0	14-13-14	NOTEST	0	0	0	0	1	1	no
Glyma01g36200	Glyma01g36200	Glyma01g36200	Gm01:48703010-48710116	14-13-0	14-13-14	OK	9.34667	4.56526	-1.03376	1.41582	0.15683	0.457142	no
Glyma01g36210	Glyma01g36210	Glyma01g36210	Gm01:48710853-48716254	14-13-0	14-13-14	OK	32.7832	11.6687	-1.49031	1.54954	0.121252	0.392858	no
Glyma01g36225	Glyma01g36225	Glyma01g36225	Gm01:48732011-48735191	14-13-0	14-13-14	OK	0.991125	0.286479	-1.79064	1.61584	0.10613	0.363127	no
Glyma01g36240	Glyma01g36240	Glyma01g36240	Gm01:48735796-48738228	14-13-0	14-13-14	NOTEST	0.350731	0.400476	0.19135	-0.170961	0.864254	1	no
Glyma01g36250	Glyma01g36250	Glyma01g36250	Gm01:48740116-48740919	14-13-0	14-13-14	OK	0.953921	0.59298	-0.685886	0.525349	0.59934	0.867927	no
Glyma01g36260	Glyma01g36260	Glyma01g36260	Gm01:48742924-48747330	14-13-0	14-13-14	OK	1.12671	1.2842	0.188761	-0.198543	0.84262	0.964384	no
Glyma01g36270	Glyma01g36270	Glyma01g36270	Gm01:48751691-48754081	14-13-0	14-13-14	OK	8.46169	4.65191	-0.863123	1.18726	0.235124	0.569428	no
Glyma01g36280	Glyma01g36280	Glyma01g36280	Gm01:48755468-48766262	14-13-0	14-13-14	OK	1.8314	1.41775	-0.369341	0.469669	0.638591	0.887009	no
Glyma01g36290	Glyma01g36290	Glyma01g36290	Gm01:48768219-48769858	14-13-0	14-13-14	OK	4.46894	6.24569	0.482929	-0.487633	0.62581	0.881436	no
Glyma01g36301	Glyma01g36301	Glyma01g36301	Gm01:48784769-48791019	14-13-0	14-13-14	OK	0.27785	2.683	3.27147	-3.31914	0.000902959	0.0151195	yes
Glyma01g36311	Glyma01g36311	Glyma01g36311	Gm01:48803722-48809885	14-13-0	14-13-14	NOTEST	0	0.102228	1.79769e+308	1.79769e+308	0.0780415	1	no
Glyma01g36320	Glyma01g36320	Glyma01g36320	Gm01:48810062-48812413	14-13-0	14-13-14	OK	6.44881	6.5203	0.0159062	-0.0174991	0.986038	0.997346	no
Glyma01g36330	Glyma01g36330	Glyma01g36330	Gm01:48812789-48816606	14-13-0	14-13-14	NOTEST	0	0	0	0	1	1	no
Glyma01g36340	Glyma01g36340	Glyma01g36340	Gm01:48817174-48822812	14-13-0	14-13-14	OK	6.27419	4.62444	-0.440149	0.609781	0.542007	0.835817	no
Glyma01g36350	Glyma01g36350	Glyma01g36350	Gm01:48822940-48825606	14-13-0	14-13-14	OK	0.718071	0.914546	0.348929	-0.347502	0.728214	0.924546	no
Glyma01g36360	Glyma01g36360	Glyma01g36360	Gm01:48830588-48836103	14-13-0	14-13-14	OK	0.0437333	0.735039	4.07102	-2.79645	0.0051667	0.0548333	no
Glyma01g36375	Glyma01g36375	Glyma01g36375	Gm01:48848060-48848643	14-13-0	14-13-14	NOTEST	0	0	0	0	1	1	no
Glyma01g36390	Glyma01g36390	Glyma01g36390	Gm01:48865791-48875859	14-13-0	14-13-14	OK	1.41281	2.71472	0.942229	-1.11259	0.265883	0.607712	no
Glyma01g36410	Glyma01g36410	Glyma01g36410	Gm01:48903092-48909719	14-13-0	14-13-14	OK	22.8498	19.3643	-0.238786	0.295091	0.767925	0.940459	no
Glyma01g36420	Glyma01g36420	Glyma01g36420	Gm01:48925196-48933027	14-13-0	14-13-14	OK	1.66603	1.76976	0.0871383	-0.092193	0.926545	0.986189	no
Glyma01g36430	Glyma01g36430	Glyma01g36430	Gm01:48939588-48943055	14-13-0	14-13-14	OK	0.828437	4.77659	2.52752	-2.76601	0.00567471	0.0584573	no
Glyma01g36440	Glyma01g36440	Glyma01g36440	Gm01:48945635-48947617	14-13-0	14-13-14	OK	17.0011	13.624	-0.319484	0.423511	0.671922	0.900818	no
Glyma01g36450	Glyma01g36450	Glyma01g36450	Gm01:48961667-48971891	14-13-0	14-13-14	OK	4.88216	5.25511	0.106203	-0.146506	0.883522	0.975218	no
Glyma01g36460	Glyma01g36460	Glyma01g36460	Gm01:48974134-48978029	14-13-0	14-13-14	NOTEST	0	0	0	0	1	1	no
Glyma01g36480	Glyma01g36480	Glyma01g36480	Gm01:48987938-48990441	14-13-0	14-13-14	OK	3.54814	14.5063	2.03155	-2.46047	0.0138754	0.107964	no
Glyma01g36490	Glyma01g36490	Glyma01g36490	Gm01:48994357-48995257	14-13-0	14-13-14	NOTEST	0	0	0	0	1	1	no
Glyma01g36500	Glyma01g36500	Glyma01g36500	Gm01:48997060-49003679	14-13-0	14-13-14	OK	0.446236	3.71577	3.05778	-3.34293	0.000828984	0.014192	yes
Glyma01g36510	Glyma01g36510	Glyma01g36510	Gm01:49007099-49008173	14-13-0	14-13-14	NOTEST	0	0.041088	1.79769e+308	1.79769e+308	0.200203	1	no
Glyma01g36520	Glyma01g36520	Glyma01g36520	Gm01:49010426-49011305	14-13-0	14-13-14	NOTEST	0	0	0	0	1	1	no
Glyma01g36530	Glyma01g36530	Glyma01g36530	Gm01:49013986-49014688	14-13-0	14-13-14	NOTEST	0	0	0	0	1	1	no
Glyma01g36545	Glyma01g36545	Glyma01g36545	Gm01:49022248-49027494	14-13-0	14-13-14	NOTEST	0	0	0	0	1	1	no
Glyma01g36560	Glyma01g36560	Glyma01g36560	Gm01:49029694-49030771	14-13-0	14-13-14	NOTEST	0	0.0736668	1.79769e+308	1.79769e+308	0.117179	1	no
Glyma01g36570	Glyma01g36570	Glyma01g36570	Gm01:49038832-49039771	14-13-0	14-13-14	OK	0.673652	3.15612	2.22808	-2.07202	0.0382636	0.199273	no
Glyma01g36580	Glyma01g36580	Glyma01g36580	Gm01:49043808-49044992	14-13-0	14-13-14	NOTEST	0	0	0	0	1	1	no
Glyma01g36590	Glyma01g36590	Glyma01g36590	Gm01:49051914-49056921	14-13-0	14-13-14	OK	0.519194	0.0485722	-3.41807	2.59773	0.00938423	0.0829428	no
Glyma01g36600	Glyma01g36600	Glyma01g36600	Gm01:49064175-49066310	14-13-0	14-13-14	OK	2.5886	8.51221	1.71736	-2.01987	0.043397	0.213295	no
Glyma01g36606	Glyma01g36606	Glyma01g36606	Gm01:49068914-49070036	14-13-0	14-13-14	OK	0.649154	1.57356	1.2774	-1.16878	0.24249	0.578021	no
Glyma01g36613	Glyma01g36613	Glyma01g36613	Gm01:49070073-49072214	14-13-0	14-13-14	OK	0.989764	0.869217	-0.187368	0.168847	0.865917	0.9706	no
Glyma01g36620	Glyma01g36620	Glyma01g36620	Gm01:49074667-49077300	14-13-0	14-13-14	OK	183.058	28.2472	-2.69612	3.0155	0.00256559	0.0334667	yes
Glyma01g36630	Glyma01g36630	Glyma01g36630	Gm01:49084944-49093758	14-13-0	14-13-14	OK	2.74925	2.651	-0.0525008	0.0655858	0.947708	0.99104	no
Glyma01g36638	Glyma01g36638	Glyma01g36638	Gm01:49107386-49109822	14-13-0	14-13-14	OK	5.74993	15.3339	1.41511	-1.77419	0.0760311	0.297193	no
Glyma01g36646	Glyma01g36646	Glyma01g36646	Gm01:49109982-49111565	14-13-0	14-13-14	OK	3.98708	8.41846	1.07822	-1.06441	0.287144	0.632303	no
Glyma01g36654	Glyma01g36654	Glyma01g36654	Gm01:49113570-49119201	14-13-0	14-13-14	OK	2.48292	4.56678	0.879141	-0.667716	0.504315	0.811494	no
Glyma01g36662	Glyma01g36662	Glyma01g36662	Gm01:49119339-49122865	14-13-0	14-13-14	OK	31.5457	10.1401	-1.63738	2.08062	0.037469	0.196862	no
Glyma01g36670	Glyma01g36670	Glyma01g36670	Gm01:49124364-49127508	14-13-0	14-13-14	OK	8.89667	14.6465	0.719219	-0.775164	0.438243	0.768367	no
Glyma01g36680	Glyma01g36680	Glyma01g36680	Gm01:49129327-49137766	14-13-0	14-13-14	OK	4.46155	3.59318	-0.312286	0.432537	0.665351	0.898351	no
Glyma01g36691	Glyma01g36691	Glyma01g36691	Gm01:49144740-49145859	14-13-0	14-13-14	NOTEST	0	0	0	0	1	1	no
Glyma01g36700	Glyma01g36700	Glyma01g36700	Gm01:49146933-49155639	14-13-0	14-13-14	OK	10.9571	9.18472	-0.254562	0.27373	0.784292	0.945639	no
Glyma01g36711	Glyma01g36711	Glyma01g36711	Gm01:49159187-49159524	14-13-0	14-13-14	OK	0	1.71756	1.79769e+308	1.79769e+308	0.0878604	0.323396	no
Glyma01g36720	Glyma01g36720	Glyma01g36720	Gm01:49164706-49167830	14-13-0	14-13-14	OK	1.31692	2.26032	0.779352	-0.741883	0.458158	0.783571	no
Glyma01g36730	Glyma01g36730	Glyma01g36730	Gm01:49171301-49172211	14-13-0	14-13-14	OK	1.95039	0.296026	-2.71997	2.24495	0.0247713	0.155173	no
Glyma01g36740	Glyma01g36740	Glyma01g36740	Gm01:49175886-49179312	14-13-0	14-13-14	OK	13.8871	12.8556	-0.111343	0.142687	0.886538	0.975675	no
Glyma01g36750	Glyma01g36750	Glyma01g36750	Gm01:49180569-49188788	14-13-0	14-13-14	OK	11.6191	19.9976	0.783331	-0.961243	0.33643	0.683826	no
Glyma01g36760	Glyma01g36760	Glyma01g36760	Gm01:49196842-49199569	14-13-0	14-13-14	OK	4.27264	4.57786	0.0995442	-0.0995779	0.920679	0.984591	no
Glyma01g36770	Glyma01g36770	Glyma01g36770	Gm01:49207142-49211246	14-13-0	14-13-14	OK	4.08245	7.57308	0.891446	-1.13062	0.258215	0.597674	no
Glyma01g36780	Glyma01g36780	Glyma01g36780	Gm01:49213870-49215923	14-13-0	14-13-14	OK	7.05752	2.5408	-1.47388	1.49583	0.134699	0.418236	no
Glyma01g36790	Glyma01g36790	Glyma01g36790	Gm01:49215924-49218539	14-13-0	14-13-14	OK	6.8989	2.01357	-1.77661	1.57812	0.114538	0.381225	no
Glyma01g36801	Glyma01g36801	Glyma01g36801	Gm01:49220679-49225998	14-13-0	14-13-14	OK	4.69839	5.10804	0.120604	-0.167477	0.866995	0.970977	no
Glyma01g36810	Glyma01g36810	Glyma01g36810	Gm01:49235149-49235590	14-13-0	14-13-14	NOTEST	0	0.310609	1.79769e+308	1.79769e+308	0.117179	1	no
Glyma01g36820	Glyma01g36820	Glyma01g36820	Gm01:49253297-49254542	14-13-0	14-13-14	NOTEST	0.0915066	0.0433067	-1.07929	0.510074	0.61	1	no
Glyma01g36831	Glyma01g36831	Glyma01g36831	Gm01:49256521-49258723	14-13-0	14-13-14	OK	2.49658	1.7118	-0.544441	0.559433	0.575866	0.855371	no
Glyma01g36840	Glyma01g36840	Glyma01g36840	Gm01:49263069-49265363	14-13-0	14-13-14	OK	4.34824	4.15284	-0.0663343	0.0902718	0.928071	0.986645	no
Glyma01g36850	Glyma01g36850	Glyma01g36850	Gm01:49266433-49268941	14-13-0	14-13-14	OK	108.038	71.5656	-0.5942	0.656225	0.511679	0.815573	no
Glyma01g36860	Glyma01g36860	Glyma01g36860	Gm01:49271742-49278414	14-13-0	14-13-14	OK	3.34492	11.383	1.76683	-2.14723	0.0317751	0.179524	no
Glyma01g36870	Glyma01g36870	Glyma01g36870	Gm01:49289720-49299050	14-13-0	14-13-14	OK	5.97097	6.58439	0.141086	-0.195185	0.845248	0.965326	no
Glyma01g36880	Glyma01g36880	Glyma01g36880	Gm01:49300170-49302868	14-13-0	14-13-14	OK	19.2571	32.3437	0.748094	-0.842085	0.39974	0.73828	no
Glyma01g36890	Glyma01g36890	Glyma01g36890	Gm01:49306067-49309782	14-13-0	14-13-14	OK	74.7578	29.4515	-1.34388	1.52192	0.128029	0.405326	no
Glyma01g36900	Glyma01g36900	Glyma01g36900	Gm01:49311611-49314379	14-13-0	14-13-14	NOTEST	0.21053	0.361472	0.779859	-0.59693	0.550554	1	no
Glyma01g36920	Glyma01g36920	Glyma01g36920	Gm01:49322909-49327222	14-13-0	14-13-14	NOTEST	0	0.190455	1.79769e+308	1.79769e+308	0.0428802	1	no
Glyma01g36931	Glyma01g36931	Glyma01g36931	Gm01:49327330-49331955	14-13-0	14-13-14	NOTEST	0	0.166054	1.79769e+308	1.79769e+308	0.0878604	1	no
Glyma01g36940	Glyma01g36940	Glyma01g36940	Gm01:49334742-49338803	14-13-0	14-13-14	OK	0.457425	1.57955	1.78791	-1.59901	0.109819	0.370961	no
Glyma01g36950	Glyma01g36950	Glyma01g36950	Gm01:49340202-49347954	14-13-0	14-13-14	OK	0.698126	0.041404	-4.07565	3.4399	0.00058192	0.0108559	yes
Glyma01g36960	Glyma01g36960	Glyma01g36960	Gm01:49357372-49363143	14-13-0	14-13-14	OK	3.64619	3.68928	0.0169505	-0.0223539	0.982166	0.996924	no
Glyma01g36980	Glyma01g36980	Glyma01g36980	Gm01:49366425-49374835	14-13-0	14-13-14	NOTEST	0	0	0	0	1	1	no
Glyma01g36990	Glyma01g36990	Glyma01g36990	Gm01:49378227-49384148	14-13-0	14-13-14	OK	15.8639	12.2664	-0.371031	0.466344	0.640969	0.888385	no
Glyma01g37000	Glyma01g37000	Glyma01g37000	Gm01:49386620-49392224	14-13-0	14-13-14	NOTEST	0.116923	0.170923	0.547793	-0.38033	0.703701	1	no
Glyma01g37010	Glyma01g37010	Glyma01g37010	Gm01:49392804-49394717	14-13-0	14-13-14	OK	18.6196	3.35122	-2.47406	3.01851	0.0025402	0.0331991	yes
Glyma01g37020	Glyma01g37020	Glyma01g37020	Gm01:49402192-49404630	14-13-0	14-13-14	OK	15.3615	8.04793	-0.932635	1.27479	0.202382	0.526347	no
Glyma01g37031	Glyma01g37031	Glyma01g37031	Gm01:49405105-49407262	14-13-0	14-13-14	NOTEST	0	0	0	0	1	1	no
Glyma01g37040	Glyma01g37040	Glyma01g37040	Gm01:49421021-49423263	14-13-0	14-13-14	OK	0.485046	0.155874	-1.63774	1.3335	0.182369	0.498429	no
Glyma01g37051	Glyma01g37051	Glyma01g37051	Gm01:49432478-49435070	14-13-0	14-13-14	NOTEST	0	0	0	0	1	1	no
Glyma01g37060	Glyma01g37060	Glyma01g37060	Gm01:49439171-49440019	14-13-0	14-13-14	NOTEST	0	0	0	0	1	1	no
Glyma01g37080	Glyma01g37080	Glyma01g37080	Gm01:49455121-49457778	14-13-0	14-13-14	OK	4.42384	1.25192	-1.82116	2.25698	0.0240094	0.152291	no
Glyma01g37090	Glyma01g37090	Glyma01g37090	Gm01:49471613-49473084	14-13-0	14-13-14	OK	18.0214	1.61297	-3.48192	3.97263	7.10839e-05	0.0021436	yes
Glyma01g37100	Glyma01g37100	Glyma01g37100	Gm01:49482623-49488331	14-13-0	14-13-14	OK	2.45514	3.03431	0.305563	-0.358463	0.719997	0.920815	no
Glyma01g37120	Glyma01g37120	Glyma01g37120	Gm01:49513343-49516212	14-13-0	14-13-14	NOTEST	0	0.0236204	1.79769e+308	1.79769e+308	0.200203	1	no
Glyma01g37130	Glyma01g37130	Glyma01g37130	Gm01:49518056-49520062	14-13-0	14-13-14	OK	0.055535	0.842528	3.92326	-2.68617	0.00722768	0.0691455	no
Glyma01g37136	Glyma01g37136	Glyma01g37136	Gm01:49520615-49552178	14-13-0	14-13-14	OK	4.198	3.07273	-0.450181	0.568048	0.570002	0.852472	no
Glyma01g37143	Glyma01g37143	Glyma01g37143	Gm01:49520615-49552178	14-13-0	14-13-14	NOTEST	0.139327	0	-1.79769e+308	-1.79769e+308	0.463383	1	no
Glyma01g37150	Glyma01g37150	Glyma01g37150	Gm01:49557207-49558582	14-13-0	14-13-14	NOTEST	0.0633502	0.0327588	-0.951467	0.449666	0.652951	1	no
Glyma01g37160	Glyma01g37160	Glyma01g37160	Gm01:49559523-49562407	14-13-0	14-13-14	OK	6.34234	4.96078	-0.354448	0.42632	0.669874	0.899986	no
Glyma01g37180	Glyma01g37180	Glyma01g37180	Gm01:49563492-49567476	14-13-0	14-13-14	OK	6.17161	4.49837	-0.456246	0.605655	0.544744	0.837671	no
Glyma01g37190	Glyma01g37190	Glyma01g37190	Gm01:49585069-49586870	14-13-0	14-13-14	NOTEST	0	0	0	0	1	1	no
Glyma01g37200	Glyma01g37200	Glyma01g37200	Gm01:49597448-49598567	14-13-0	14-13-14	NOTEST	0	0.0591669	1.79769e+308	1.79769e+308	0.200203	1	no
Glyma01g37215	Glyma01g37215	Glyma01g37215	Gm01:49610632-49612072	14-13-0	14-13-14	NOTEST	0	0	0	0	1	1	no
Glyma01g37230	Glyma01g37230	Glyma01g37230	Gm01:49610632-49612072	14-13-0	14-13-14	NOTEST	0	0	0	0	1	1	no
Glyma01g37240	Glyma01g37240	Glyma01g37240	Gm01:49616496-49621295	14-13-0	14-13-14	OK	0.479277	0.747577	0.641362	-0.56896	0.569384	0.852245	no
Glyma01g37250	Glyma01g37250	Glyma01g37250	Gm01:49624839-49626433	14-13-0	14-13-14	OK	163.19	58.0497	-1.49119	1.51054	0.130905	0.411181	no
Glyma01g37270	Glyma01g37270	Glyma01g37270	Gm01:49637622-49639519	14-13-0	14-13-14	OK	30.6725	69.4091	1.17818	-1.28044	0.200391	0.523487	no
Glyma01g37290	Glyma01g37290	Glyma01g37290	Gm01:49639992-49643961	14-13-0	14-13-14	OK	5.96102	12.17	1.02969	-0.964457	0.334817	0.682315	no
Glyma01g37296	Glyma01g37296	Glyma01g37296	Gm01:49646115-49646903	14-13-0	14-13-14	OK	102.667	126.657	0.302961	-0.420855	0.673861	0.902122	no
Glyma01g37303	Glyma01g37303	Glyma01g37303	Gm01:49646973-49647556	14-13-0	14-13-14	OK	0.601197	0.742042	0.303664	-0.214035	0.83052	0.960692	no
Glyma01g37310	Glyma01g37310	Glyma01g37310	Gm01:49651805-49656854	14-13-0	14-13-14	OK	0.476076	0.980255	1.04197	-0.954493	0.339834	0.68743	no
Glyma01g37320	Glyma01g37320	Glyma01g37320	Gm01:49680382-49682445	14-13-0	14-13-14	OK	25.9793	40.0993	0.626215	-0.834043	0.404257	0.741798	no
Glyma01g37330	Glyma01g37330	Glyma01g37330	Gm01:49688213-49691604	14-13-0	14-13-14	NOTEST	0.135523	0.404672	1.57821	-1.36603	0.171931	1	no
Glyma01g37341	Glyma01g37341	Glyma01g37341	Gm01:49698283-49706430	14-13-0	14-13-14	OK	8.50862	12.8338	0.592955	-0.700086	0.483874	0.799493	no
Glyma01g37350	Glyma01g37350	Glyma01g37350	Gm01:49711599-49713520	14-13-0	14-13-14	NOTEST	0	0	0	0	1	1	no
Glyma01g37360	Glyma01g37360	Glyma01g37360	Gm01:49721188-49723541	14-13-0	14-13-14	OK	1.66265	63.6248	5.25803	-5.54108	3.00607e-08	4.61011e-06	yes
Glyma01g37370	Glyma01g37370	Glyma01g37370	Gm01:49725132-49728656	14-13-0	14-13-14	OK	51.3995	1.64554	-4.96512	5.38359	7.30165e-08	9.34556e-06	yes
Glyma01g37380	Glyma01g37380	Glyma01g37380	Gm01:49736248-49744811	14-13-0	14-13-14	OK	4.92361	3.57086	-0.463446	0.587197	0.557071	0.844893	no
Glyma01g37393	Glyma01g37393	Glyma01g37393	Gm01:49755262-49762118	14-13-0	14-13-14	OK	5.66853	4.14683	-0.450964	0.61525	0.53839	0.832738	no
Glyma01g37406	Glyma01g37406	Glyma01g37406	Gm01:49766181-49770448	14-13-0	14-13-14	OK	5.22348	4.5986	-0.183818	0.234842	0.814331	0.95504	no
Glyma01g37420	Glyma01g37420	Glyma01g37420	Gm01:49772165-49778547	14-13-0	14-13-14	OK	1.70391	1.45352	-0.229291	0.270194	0.787011	0.94637	no
Glyma01g37430	Glyma01g37430	Glyma01g37430	Gm01:49781351-49784822	14-13-0	14-13-14	NOTEST	0.141843	0.251795	0.827957	-0.679024	0.497123	1	no
Glyma01g37440	Glyma01g37440	Glyma01g37440	Gm01:49804689-49806831	14-13-0	14-13-14	NOTEST	0	0	0	0	1	1	no
Glyma01g37450	Glyma01g37450	Glyma01g37450	Gm01:49804689-49806831	14-13-0	14-13-14	OK	3.47793	15.3667	2.1435	-2.76776	0.00564432	0.0582873	no
Glyma01g37460	Glyma01g37460	Glyma01g37460	Gm01:49816977-49818918	14-13-0	14-13-14	OK	9.64554	25.738	1.41597	-1.83221	0.0669196	0.274668	no
Glyma01g37470	Glyma01g37470	Glyma01g37470	Gm01:49821773-49824393	14-13-0	14-13-14	NOTEST	0	0.328886	1.79769e+308	1.79769e+308	0.0524165	1	no
Glyma01g37480	Glyma01g37480	Glyma01g37480	Gm01:49830529-49834966	14-13-0	14-13-14	OK	21.5846	20.2398	-0.0928071	0.128565	0.897702	0.978474	no
Glyma01g37490	Glyma01g37490	Glyma01g37490	Gm01:49841544-49848877	14-13-0	14-13-14	OK	9.50043	3.05075	-1.63883	1.94389	0.0519083	0.236741	no
Glyma01g37500	Glyma01g37500	Glyma01g37500	Gm01:49850120-49854265	14-13-0	14-13-14	OK	24.5856	10.9967	-1.16074	1.45832	0.144752	0.436088	no
Glyma01g37510	Glyma01g37510	Glyma01g37510	Gm01:49858452-49865847	14-13-0	14-13-14	OK	0.569931	1.19034	1.06252	-1.02604	0.304872	0.651307	no
Glyma01g37520	Glyma01g37520	Glyma01g37520	Gm01:49869523-49871376	14-13-0	14-13-14	OK	2.15209	2.07154	-0.0550347	0.0619945	0.950567	0.991468	no
Glyma01g37530	Glyma01g37530	Glyma01g37530	Gm01:49872196-49872388	14-13-0	14-13-14	NOTEST	0	0	0	0	1	1	no
Glyma01g37541	Glyma01g37541	Glyma01g37541	Gm01:49879281-49885195	14-13-0	14-13-14	OK	39.0552	50.2248	0.362885	-0.356923	0.72115	0.921396	no
Glyma01g37550	Glyma01g37550	Glyma01g37550	Gm01:49885628-49888995	14-13-0	14-13-14	OK	189.935	17.907	-3.40692	3.91176	9.16245e-05	0.0026126	yes
Glyma01g37560	Glyma01g37560	Glyma01g37560	Gm01:49891280-49893312	14-13-0	14-13-14	OK	9.30714	7.15296	-0.379796	0.408055	0.683234	0.906205	no
Glyma01g37571	Glyma01g37571	Glyma01g37571	Gm01:49893933-49905366	14-13-0	14-13-14	NOTEST	0	0	0	0	1	1	no
Glyma01g37580	Glyma01g37580	Glyma01g37580	Gm01:49893933-49905366	14-13-0	14-13-14	OK	20.0434	15.0387	-0.414447	0.519518	0.6034	0.870039	no
Glyma01g37590	Glyma01g37590	Glyma01g37590	Gm01:49909450-49916251	14-13-0	14-13-14	OK	0.746727	0.920158	0.301302	-0.288639	0.772858	0.942028	no
Glyma01g37600	Glyma01g37600	Glyma01g37600	Gm01:49942124-49946080	14-13-0	14-13-14	NOTEST	0	0.012111	1.79769e+308	1.79769e+308	0.200203	1	no
Glyma01g37610	Glyma01g37610	Glyma01g37610	Gm01:49946274-49947782	14-13-0	14-13-14	OK	8.70569	8.79865	0.0153229	-0.0166407	0.986723	0.997564	no
Glyma01g37620	Glyma01g37620	Glyma01g37620	Gm01:49949013-49952809	14-13-0	14-13-14	OK	1.85523	2.87993	0.63443	-0.802398	0.422323	0.755636	no
Glyma01g37630	Glyma01g37630	Glyma01g37630	Gm01:49953469-49956749	14-13-0	14-13-14	NOTEST	0.0468044	0.0236955	-0.982032	0.464112	0.642568	1	no
Glyma01g37640	Glyma01g37640	Glyma01g37640	Gm01:49963812-49969112	14-13-0	14-13-14	NOTEST	0.124102	0.0311279	-1.99525	1.3104	0.190059	1	no
Glyma01g37650	Glyma01g37650	Glyma01g37650	Gm01:49975720-49977560	14-13-0	14-13-14	NOTEST	0.164298	0.373183	1.18357	-0.959393	0.337361	1	no
Glyma01g37670	Glyma01g37670	Glyma01g37670	Gm01:49982520-49986256	14-13-0	14-13-14	OK	4.10966	3.91709	-0.069236	0.0934584	0.925539	0.986189	no
Glyma01g37675	Glyma01g37675	Glyma01g37675	Gm01:49992409-49993063	14-13-0	14-13-14	NOTEST	0	0	0	0	1	1	no
Glyma01g37680	Glyma01g37680	Glyma01g37680	Gm01:49999698-50001148	14-13-0	14-13-14	NOTEST	0	0	0	0	1	1	no
Glyma01g37690	Glyma01g37690	Glyma01g37690	Gm01:50011031-50012116	14-13-0	14-13-14	NOTEST	0.150112	0	-1.79769e+308	-1.79769e+308	0.0794037	1	no
Glyma01g37710	Glyma01g37710	Glyma01g37710	Gm01:50023553-50027805	14-13-0	14-13-14	OK	20.506	3.67761	-2.4792	3.15947	0.00158058	0.0233965	yes
Glyma01g37720	Glyma01g37720	Glyma01g37720	Gm01:50028224-50031144	14-13-0	14-13-14	OK	9.83443	21.0805	1.09999	-1.41109	0.158217	0.459065	no
Glyma01g37730	Glyma01g37730	Glyma01g37730	Gm01:50039747-50044012	14-13-0	14-13-14	OK	6.68485	8.41128	0.331431	-0.459348	0.645984	0.890412	no
Glyma01g37750	Glyma01g37750	Glyma01g37750	Gm01:50051364-50051706	14-13-0	14-13-14	NOTEST	0	0	0	0	1	1	no
Glyma01g37760	Glyma01g37760	Glyma01g37760	Gm01:50053788-50061598	14-13-0	14-13-14	OK	1.06677	4.48754	2.07268	-2.58129	0.00984311	0.0857081	no
Glyma01g37780	Glyma01g37780	Glyma01g37780	Gm01:50066372-50070574	14-13-0	14-13-14	OK	24.0911	11.7407	-1.03699	1.41703	0.156475	0.456412	no
Glyma01g37790	Glyma01g37790	Glyma01g37790	Gm01:50071761-50075271	14-13-0	14-13-14	OK	17.0248	19.378	0.186783	-0.237249	0.812464	0.954866	no
Glyma01g37801	Glyma01g37801	Glyma01g37801	Gm01:50076638-50080885	14-13-0	14-13-14	NOTEST	0	0.0148714	1.79769e+308	1.79769e+308	0.200203	1	no
Glyma01g37810	Glyma01g37810	Glyma01g37810	Gm01:50095935-50098278	14-13-0	14-13-14	OK	1.45538	6.88221	2.24148	-2.54856	0.0108168	0.0914269	no
Glyma01g37820	Glyma01g37820	Glyma01g37820	Gm01:50121728-50127532	14-13-0	14-13-14	NOTEST	0.141533	0	-1.79769e+308	-1.79769e+308	0.0666501	1	no
Glyma01g37840	Glyma01g37840	Glyma01g37840	Gm01:50130998-50133253	14-13-0	14-13-14	NOTEST	0	0.0323697	1.79769e+308	1.79769e+308	0.200203	1	no
Glyma01g37850	Glyma01g37850	Glyma01g37850	Gm01:50135076-50137305	14-13-0	14-13-14	OK	0.572022	0.282953	-1.01551	0.843742	0.398814	0.737377	no
Glyma01g37860	Glyma01g37860	Glyma01g37860	Gm01:50141791-50144442	14-13-0	14-13-14	OK	2.16335	1.75008	-0.305851	0.333005	0.739131	0.929349	no
Glyma01g37870	Glyma01g37870	Glyma01g37870	Gm01:50146983-50150059	14-13-0	14-13-14	OK	51.614	11.2606	-2.19648	2.61732	0.00886229	0.0795689	no
Glyma01g37880	Glyma01g37880	Glyma01g37880	Gm01:50151986-50153270	14-13-0	14-13-14	NOTEST	0	0.152249	1.79769e+308	1.79769e+308	0.070927	1	no
Glyma01g37890	Glyma01g37890	Glyma01g37890	Gm01:50153494-50155300	14-13-0	14-13-14	OK	3.48675	3.07662	-0.180539	0.219095	0.826576	0.959286	no
Glyma01g37900	Glyma01g37900	Glyma01g37900	Gm01:50155332-50163097	14-13-0	14-13-14	OK	305.378	35.7559	-3.09434	2.76493	0.00569342	0.0585968	no
Glyma01g37910	Glyma01g37910	Glyma01g37910	Gm01:50155332-50163097	14-13-0	14-13-14	OK	8.13328	3.45123	-1.23673	0.298719	0.765155	0.939477	no
Glyma01g37920	Glyma01g37920	Glyma01g37920	Gm01:50155332-50163097	14-13-0	14-13-14	NOTEST	0.0782609	0.221852	1.50324	-0.0318737	0.974573	1	no
Glyma01g37930	Glyma01g37930	Glyma01g37930	Gm01:50166501-50169549	14-13-0	14-13-14	OK	1.01865	1.02033	0.00237338	-0.00236488	0.998113	0.999828	no
Glyma01g37940	Glyma01g37940	Glyma01g37940	Gm01:50177417-50180805	14-13-0	14-13-14	OK	8.72698	7.97219	-0.130506	0.181118	0.856275	0.96811	no
Glyma01g37950	Glyma01g37950	Glyma01g37950	Gm01:50182416-50188946	14-13-0	14-13-14	OK	2.46941	0.0121823	-7.66323	2.67339	0.007509	0.0709749	no
Glyma01g37961	Glyma01g37961	Glyma01g37961	Gm01:50206805-50209153	14-13-0	14-13-14	NOTEST	0	0	0	0	1	1	no
Glyma01g37970	Glyma01g37970	Glyma01g37970	Gm01:50210431-50216350	14-13-0	14-13-14	OK	2.5987	1.51815	-0.775478	0.929484	0.352638	0.697929	no
Glyma01g37980	Glyma01g37980	Glyma01g37980	Gm01:50217118-50219743	14-13-0	14-13-14	NOTEST	0	0	0	0	1	1	no
Glyma01g37993	Glyma01g37993	Glyma01g37993	Gm01:50222810-50223758	14-13-0	14-13-14	OK	0.360622	1.96726	2.44763	-2.13421	0.0328257	0.182403	no
Glyma01g38006	Glyma01g38006	Glyma01g38006	Gm01:50230283-50235022	14-13-0	14-13-14	NOTEST	0	0.100304	1.79769e+308	1.79769e+308	0.158655	1	no
Glyma01g38020	Glyma01g38020	Glyma01g38020	Gm01:50230283-50235022	14-13-0	14-13-14	LOWDATA	0	0	1.79769e+308	0	1	1	no
Glyma01g38040	Glyma01g38040	Glyma01g38040	Gm01:50244376-50247091	14-13-0	14-13-14	NOTEST	0	0	0	0	1	1	no
Glyma01g38050	Glyma01g38050	Glyma01g38050	Gm01:50251094-50252088	14-13-0	14-13-14	NOTEST	0	0	0	0	1	1	no
Glyma01g38060	Glyma01g38060	Glyma01g38060	Gm01:50253664-50255929	14-13-0	14-13-14	NOTEST	0	0	0	0	1	1	no
Glyma01g38070	Glyma01g38070	Glyma01g38070	Gm01:50257294-50261107	14-13-0	14-13-14	OK	9.49064	4.86871	-0.962966	1.16152	0.245429	0.581075	no
Glyma01g38080	Glyma01g38080	Glyma01g38080	Gm01:50257294-50261107	14-13-0	14-13-14	OK	1.13795	1.75566	0.62558	-0.101653	0.919032	0.983894	no
Glyma01g38090	Glyma01g38090	Glyma01g38090	Gm01:50261440-50263777	14-13-0	14-13-14	OK	3.69829	7.62997	1.04482	-1.39036	0.164421	0.46966	no
Glyma01g38105	Glyma01g38105	Glyma01g38105	Gm01:50271874-50276395	14-13-0	14-13-14	NOTEST	0.165714	0.184581	0.155557	-0.123975	0.901335	1	no
Glyma01g38120	Glyma01g38120	Glyma01g38120	Gm01:50277040-50282069	14-13-0	14-13-14	OK	26.5366	20.0453	-0.404717	0.495355	0.620349	0.878261	no
Glyma01g38130	Glyma01g38130	Glyma01g38130	Gm01:50286808-50291347	14-13-0	14-13-14	OK	1.14332	39.3103	5.10361	-5.42564	5.77466e-08	7.64996e-06	yes
Glyma01g38150	Glyma01g38150	Glyma01g38150	Gm01:50297901-50304459	14-13-0	14-13-14	OK	1.03996	1.40786	0.436977	-0.484487	0.62804	0.88201	no
Glyma01g38165	Glyma01g38165	Glyma01g38165	Gm01:50306261-50309677	14-13-0	14-13-14	OK	3.71599	3.40952	-0.124177	0.128136	0.898041	0.978546	no
Glyma01g38180	Glyma01g38180	Glyma01g38180	Gm01:50334433-50339882	14-13-0	14-13-14	OK	3.15557	6.90033	1.12877	-1.40045	0.161379	0.463797	no
Glyma01g38190	Glyma01g38190	Glyma01g38190	Gm01:50334433-50339882	14-13-0	14-13-14	OK	0.969551	2.62056	1.43449	-0.508635	0.611008	0.873467	no
Glyma01g38200	Glyma01g38200	Glyma01g38200	Gm01:50344732-50351525	14-13-0	14-13-14	OK	27.2298	14.4987	-0.909267	1.10772	0.267981	0.610035	no
Glyma01g38211	Glyma01g38211	Glyma01g38211	Gm01:50359266-50363158	14-13-0	14-13-14	OK	310.887	128.619	-1.27328	0.500339	0.616837	0.876134	no
Glyma01g38220	Glyma01g38220	Glyma01g38220	Gm01:50366968-50368330	14-13-0	14-13-14	OK	0.942947	0.199593	-2.24011	1.81253	0.0699048	0.282557	no
Glyma01g38230	Glyma01g38230	Glyma01g38230	Gm01:50369093-50373219	14-13-0	14-13-14	OK	5.67285	10.2663	0.855773	-1.10174	0.270575	0.613397	no
Glyma01g38240	Glyma01g38240	Glyma01g38240	Gm01:50382617-50389821	14-13-0	14-13-14	OK	4.10323	2.45949	-0.738397	1.00248	0.316113	0.663239	no
Glyma01g38250	Glyma01g38250	Glyma01g38250	Gm01:50392826-50393355	14-13-0	14-13-14	NOTEST	0	0.13031	1.79769e+308	1.79769e+308	0.200203	1	no
Glyma01g38260	Glyma01g38260	Glyma01g38260	Gm01:50394489-50396439	14-13-0	14-13-14	OK	2.23467	1.47716	-0.597232	0.55612	0.578129	0.856286	no
Glyma01g38270	Glyma01g38270	Glyma01g38270	Gm01:50396914-50399570	14-13-0	14-13-14	OK	1.98034	2.92134	0.560881	-0.572443	0.567022	0.85115	no
Glyma01g38280	Glyma01g38280	Glyma01g38280	Gm01:50400416-50410022	14-13-0	14-13-14	OK	1.71639	0.973658	-0.817886	0.973163	0.330472	0.677542	no
Glyma01g38285	Glyma01g38285	Glyma01g38285	Gm01:50429282-50431539	14-13-0	14-13-14	NOTEST	0	0	0	0	1	1	no
Glyma01g38290	Glyma01g38290	Glyma01g38290	Gm01:50444755-50448681	14-13-0	14-13-14	OK	12.8315	8.5679	-0.582678	0.759331	0.447654	0.776718	no
Glyma01g38305	Glyma01g38305	Glyma01g38305	Gm01:50449917-50454973	14-13-0	14-13-14	OK	2.88648	1.67284	-0.787013	0.905538	0.365181	0.709056	no
Glyma01g38320	Glyma01g38320	Glyma01g38320	Gm01:50456603-50460237	14-13-0	14-13-14	OK	21.3591	14.3735	-0.571442	0.665916	0.505465	0.811917	no
Glyma01g38330	Glyma01g38330	Glyma01g38330	Gm01:50462526-50464658	14-13-0	14-13-14	OK	4.66263	3.06681	-0.604405	0.594309	0.552305	0.841584	no
Glyma01g38340	Glyma01g38340	Glyma01g38340	Gm01:50465731-50468463	14-13-0	14-13-14	NOTEST	0.0227421	0.0352151	0.630827	-0.386138	0.699395	1	no
Glyma01g38350	Glyma01g38350	Glyma01g38350	Gm01:50468718-50471279	14-13-0	14-13-14	NOTEST	0.183253	0.0308039	-2.57265	1.30825	0.190788	1	no
Glyma01g38360	Glyma01g38360	Glyma01g38360	Gm01:50481849-50484062	14-13-0	14-13-14	OK	8.68687	6.0243	-0.528042	0.729411	0.46575	0.788392	no
Glyma01g38370	Glyma01g38370	Glyma01g38370	Gm01:50487836-50491942	14-13-0	14-13-14	OK	12.626	11.3074	-0.159133	0.214598	0.830081	0.96057	no
Glyma01g38381	Glyma01g38381	Glyma01g38381	Gm01:50492109-50499655	14-13-0	14-13-14	NOTEST	0.223819	0.148324	-0.593574	0.452622	0.650821	1	no
Glyma01g38390	Glyma01g38390	Glyma01g38390	Gm01:50502781-50505172	14-13-0	14-13-14	NOTEST	0	0.321901	1.79769e+308	1.79769e+308	0.0542051	1	no
Glyma01g38400	Glyma01g38400	Glyma01g38400	Gm01:50522426-50525037	14-13-0	14-13-14	OK	3.57685	4.61054	0.366246	-0.475093	0.634721	0.885027	no
Glyma01g38410	Glyma01g38410	Glyma01g38410	Gm01:50528621-50536566	14-13-0	14-13-14	OK	18.8688	6.66818	-1.50064	1.65003	0.0989358	0.348116	no
Glyma01g38430	Glyma01g38430	Glyma01g38430	Gm01:50543383-50544862	14-13-0	14-13-14	NOTEST	0	0	0	0	1	1	no
Glyma01g38450	Glyma01g38450	Glyma01g38450	Gm01:50549840-50551564	14-13-0	14-13-14	OK	23.5374	26.9983	0.197913	-0.246165	0.805555	0.952371	no
Glyma01g38460	Glyma01g38460	Glyma01g38460	Gm01:50559469-50563981	14-13-0	14-13-14	OK	2.64463	3.1253	0.240926	-0.291127	0.770954	0.941273	no
Glyma01g38470	Glyma01g38470	Glyma01g38470	Gm01:50564247-50567428	14-13-0	14-13-14	OK	64.9538	46.1297	-0.493718	0.505996	0.612859	0.874438	no
Glyma01g38481	Glyma01g38481	Glyma01g38481	Gm01:50571005-50572016	14-13-0	14-13-14	OK	0.219899	0.566831	1.36607	-1.06656	0.286173	0.631108	no
Glyma01g38490	Glyma01g38490	Glyma01g38490	Gm01:50575585-50578085	14-13-0	14-13-14	OK	0.980402	0.854494	-0.198303	0.184746	0.853428	0.967495	no
Glyma01g38500	Glyma01g38500	Glyma01g38500	Gm01:50580026-50582631	14-13-0	14-13-14	OK	3.82829	0.0225482	-7.40754	4.10559	4.03277e-05	0.00137851	yes
Glyma01g38510	Glyma01g38510	Glyma01g38510	Gm01:50585499-50587165	14-13-0	14-13-14	OK	8.42446	6.43441	-0.388777	0.517853	0.604561	0.870828	no
Glyma01g38520	Glyma01g38520	Glyma01g38520	Gm01:50595299-50597560	14-13-0	14-13-14	OK	1.19603	1.91676	0.68041	-0.733003	0.463557	0.786752	no
Glyma01g38530	Glyma01g38530	Glyma01g38530	Gm01:50601604-50607434	14-13-0	14-13-14	NOTEST	0	0	0	0	1	1	no
Glyma01g38540	Glyma01g38540	Glyma01g38540	Gm01:50612385-50613848	14-13-0	14-13-14	NOTEST	0	0	0	0	1	1	no
Glyma01g38550	Glyma01g38550	Glyma01g38550	Gm01:50621610-50624263	14-13-0	14-13-14	NOTEST	0	0.03905	1.79769e+308	1.79769e+308	0.117179	1	no
Glyma01g38560	Glyma01g38560	Glyma01g38560	Gm01:50625695-50629374	14-13-0	14-13-14	NOTEST	0	0.00972566	1.79769e+308	1.79769e+308	0.200203	1	no
Glyma01g38570	Glyma01g38570	Glyma01g38570	Gm01:50630573-50632809	14-13-0	14-13-14	OK	0.519939	0.287149	-0.856543	0.732248	0.464017	0.787045	no
Glyma01g38580	Glyma01g38580	Glyma01g38580	Gm01:50633743-50644902	14-13-0	14-13-14	OK	0.679359	2.46064	1.85679	-2.22143	0.0263217	0.161497	no
Glyma01g38590	Glyma01g38590	Glyma01g38590	Gm01:50645459-50648060	14-13-0	14-13-14	OK	16.9412	0.652109	-4.69928	5.06365	4.11308e-07	3.67543e-05	yes
Glyma01g38600	Glyma01g38600	Glyma01g38600	Gm01:50652785-50654854	14-13-0	14-13-14	OK	2.07662	0.0414878	-5.6454	4.11914	3.80289e-05	0.00131796	yes
Glyma01g38610	Glyma01g38610	Glyma01g38610	Gm01:50657110-50660265	14-13-0	14-13-14	NOTEST	0.0413769	0.0609361	0.558473	-0.341849	0.732465	1	no
Glyma01g38630	Glyma01g38630	Glyma01g38630	Gm01:50667181-50669294	14-13-0	14-13-14	NOTEST	0	0.0848792	1.79769e+308	1.79769e+308	0.0780415	1	no
Glyma01g38640	Glyma01g38640	Glyma01g38640	Gm01:50682059-50689940	14-13-0	14-13-14	OK	10.0143	4.64244	-1.1091	1.52096	0.128271	0.405902	no
Glyma01g38650	Glyma01g38650	Glyma01g38650	Gm01:50714207-50721679	14-13-0	14-13-14	OK	33.4432	11.2348	-1.57373	1.78485	0.074285	0.292856	no
Glyma01g38660	Glyma01g38660	Glyma01g38660	Gm01:50733266-50737661	14-13-0	14-13-14	OK	0.91207	1.24025	0.443411	-0.463838	0.642764	0.888708	no
Glyma01g38671	Glyma01g38671	Glyma01g38671	Gm01:50746604-50760836	14-13-0	14-13-14	OK	0.887971	1.98136	1.15791	-1.2708	0.203801	0.528214	no
Glyma01g38680	Glyma01g38680	Glyma01g38680	Gm01:50767560-50772744	14-13-0	14-13-14	OK	1.4238	1.87421	0.396537	-0.464182	0.642517	0.888708	no
Glyma01g38683	Glyma01g38683	Glyma01g38683	Gm01:50776465-50776986	14-13-0	14-13-14	NOTEST	0	0	0	0	1	1	no
Glyma01g38686	Glyma01g38686	Glyma01g38686	Gm01:50778421-50779180	14-13-0	14-13-14	NOTEST	0	0.107279	1.79769e+308	1.79769e+308	0.200203	1	no
Glyma01g38690	Glyma01g38690	Glyma01g38690	Gm01:50779484-50780771	14-13-0	14-13-14	OK	0	31.4333	1.79769e+308	1.79769e+308	0.00408477	0.0468249	yes
Glyma01g38710	Glyma01g38710	Glyma01g38710	Gm01:50784350-50784782	14-13-0	14-13-14	OK	0.997734	1.11303	0.157761	-0.12161	0.903208	0.980193	no
Glyma01g38720	Glyma01g38720	Glyma01g38720	Gm01:50799865-50800659	14-13-0	14-13-14	OK	0	1.70549	1.79769e+308	1.79769e+308	0.0296955	0.173267	no
Glyma01g38730	Glyma01g38730	Glyma01g38730	Gm01:50805196-50807200	14-13-0	14-13-14	OK	0.166338	0.501604	1.59243	-1.30961	0.190327	0.510185	no
Glyma01g38740	Glyma01g38740	Glyma01g38740	Gm01:50808925-50811172	14-13-0	14-13-14	OK	1.92462	1.80409	-0.0932995	0.0865375	0.931039	0.98724	no
Glyma01g38750	Glyma01g38750	Glyma01g38750	Gm01:50813274-50815197	14-13-0	14-13-14	OK	1728.17	392.953	-2.13682	1.08633	0.277335	0.620571	no
Glyma01g38760	Glyma01g38760	Glyma01g38760	Gm01:50816662-50817396	14-13-0	14-13-14	OK	8.45423	0	-1.79769e+308	-1.79769e+308	0.0265033	0.162262	no
Glyma01g38770	Glyma01g38770	Glyma01g38770	Gm01:50817872-50819939	14-13-0	14-13-14	OK	6.00806	2.07933	-1.53078	1.62634	0.103877	0.358498	no
Glyma01g38780	Glyma01g38780	Glyma01g38780	Gm01:50823650-50825788	14-13-0	14-13-14	OK	0.849112	0.0221873	-5.25815	2.80788	0.00498686	0.0535592	no
Glyma01g38800	Glyma01g38800	Glyma01g38800	Gm01:50835383-50838753	14-13-0	14-13-14	OK	15.2964	11.7071	-0.385804	0.517094	0.605091	0.870891	no
Glyma01g38830	Glyma01g38830	Glyma01g38830	Gm01:50842944-50844670	14-13-0	14-13-14	NOTEST	0	0	0	0	1	1	no
Glyma01g38840	Glyma01g38840	Glyma01g38840	Gm01:50846296-50851361	14-13-0	14-13-14	OK	4.49714	5.96483	0.407473	-0.555982	0.578223	0.856286	no
Glyma01g38850	Glyma01g38850	Glyma01g38850	Gm01:50852873-50855077	14-13-0	14-13-14	NOTEST	0	0	0	0	1	1	no
Glyma01g38860	Glyma01g38860	Glyma01g38860	Gm01:50858802-50861902	14-13-0	14-13-14	OK	0.0424863	0.652829	3.94164	-2.69565	0.00702524	0.0677882	no
Glyma01g38870	Glyma01g38870	Glyma01g38870	Gm01:50865163-50867505	14-13-0	14-13-14	NOTEST	0	0.016817	1.79769e+308	1.79769e+308	0.200203	1	no
Glyma01g38880	Glyma01g38880	Glyma01g38880	Gm01:50879358-50885115	14-13-0	14-13-14	OK	3.85467	0.0966311	-5.31797	4.73172	2.2263e-06	0.000140625	yes
Glyma01g38890	Glyma01g38890	Glyma01g38890	Gm01:50885116-50891376	14-13-0	14-13-14	OK	3.23255	4.35628	0.430425	-0.596358	0.550936	0.840551	no
Glyma01g38900	Glyma01g38900	Glyma01g38900	Gm01:50896720-50898557	14-13-0	14-13-14	NOTEST	0	0.386811	1.79769e+308	1.79769e+308	0.037775	1	no
Glyma01g38905	Glyma01g38905	Glyma01g38905	Gm01:50904042-50904806	14-13-0	14-13-14	NOTEST	0	0	0	0	1	1	no
Glyma01g38910	Glyma01g38910	Glyma01g38910	Gm01:50905481-50907657	14-13-0	14-13-14	OK	2.77914	2.91327	0.068001	-0.0724991	0.942205	0.99017	no
Glyma01g38920	Glyma01g38920	Glyma01g38920	Gm01:50914354-50920765	14-13-0	14-13-14	OK	0.737581	1.95088	1.40325	-1.43912	0.150115	0.446419	no
Glyma01g38930	Glyma01g38930	Glyma01g38930	Gm01:50921917-50923972	14-13-0	14-13-14	OK	102.576	72.4626	-0.50138	0.542588	0.587413	0.861592	no
Glyma01g38940	Glyma01g38940	Glyma01g38940	Gm01:50926261-50927303	14-13-0	14-13-14	OK	360.554	119.222	-1.59656	1.47118	0.141243	0.430414	no
Glyma01g38950	Glyma01g38950	Glyma01g38950	Gm01:50927363-50936118	14-13-0	14-13-14	OK	14.6072	7.12995	-1.03471	1.34423	0.178873	0.492871	no
Glyma01g38970	Glyma01g38970	Glyma01g38970	Gm01:50951026-50952807	14-13-0	14-13-14	OK	1.08378	1.53744	0.504466	-0.50445	0.613945	0.874796	no
Glyma01g38980	Glyma01g38980	Glyma01g38980	Gm01:50956636-50960580	14-13-0	14-13-14	OK	1.85807	14.4945	2.96363	-3.62678	0.000286973	0.00634871	yes
Glyma01g38990	Glyma01g38990	Glyma01g38990	Gm01:50965004-50966084	14-13-0	14-13-14	NOTEST	0	0.295388	1.79769e+308	1.79769e+308	0.0780415	1	no
Glyma01g39000	Glyma01g39000	Glyma01g39000	Gm01:50968054-50971842	14-13-0	14-13-14	OK	0.606564	2.4389	2.0075	-2.19752	0.0279831	0.167643	no
Glyma01g39010	Glyma01g39010	Glyma01g39010	Gm01:50973225-50978011	14-13-0	14-13-14	OK	1.15265	1.93152	0.744777	-0.882367	0.377578	0.719203	no
Glyma01g39020	Glyma01g39020	Glyma01g39020	Gm01:50978689-50990291	14-13-0	14-13-14	OK	4.7504	3.7472	-0.342235	0.448034	0.654129	0.894181	no
Glyma01g39030	Glyma01g39030	Glyma01g39030	Gm01:50993362-50998484	14-13-0	14-13-14	OK	12.5278	7.76965	-0.689212	0.833077	0.404801	0.742417	no
Glyma01g39040	Glyma01g39040	Glyma01g39040	Gm01:51015839-51018131	14-13-0	14-13-14	OK	2.63423	0.0408918	-6.00943	4.44825	8.65725e-06	0.000416306	yes
Glyma01g39050	Glyma01g39050	Glyma01g39050	Gm01:51020378-51026936	14-13-0	14-13-14	OK	3.43209	2.29046	-0.583455	0.72812	0.46654	0.788867	no
Glyma01g39060	Glyma01g39060	Glyma01g39060	Gm01:51032159-51036122	14-13-0	14-13-14	NOTEST	0	0.196186	1.79769e+308	1.79769e+308	0.110916	1	no
Glyma01g39071	Glyma01g39071	Glyma01g39071	Gm01:51054324-51059649	14-13-0	14-13-14	NOTEST	0	0	0	0	1	1	no
Glyma01g39080	Glyma01g39080	Glyma01g39080	Gm01:51065275-51067178	14-13-0	14-13-14	NOTEST	0	0	0	0	1	1	no
Glyma01g39090	Glyma01g39090	Glyma01g39090	Gm01:51073678-51079219	14-13-0	14-13-14	OK	1.61975	1.811	0.161011	-0.191632	0.848031	0.965814	no
Glyma01g39100	Glyma01g39100	Glyma01g39100	Gm01:51080529-51083731	14-13-0	14-13-14	OK	1.13652	1.85649	0.707949	-0.746635	0.455284	0.781398	no
Glyma01g39110	Glyma01g39110	Glyma01g39110	Gm01:51090471-51105666	14-13-0	14-13-14	OK	0.406109	1.0749	1.40427	-1.02405	0.30581	0.652509	no
Glyma01g39120	Glyma01g39120	Glyma01g39120	Gm01:51105888-51110702	14-13-0	14-13-14	OK	22.7018	35.5978	0.648983	-0.438017	0.661374	0.896751	no
Glyma01g39141	Glyma01g39141	Glyma01g39141	Gm01:51125197-51131131	14-13-0	14-13-14	OK	4.08874	2.48713	-0.717171	0.988257	0.323027	0.669605	no
Glyma01g39160	Glyma01g39160	Glyma01g39160	Gm01:51146769-51147427	14-13-0	14-13-14	NOTEST	0	0	0	0	1	1	no
Glyma01g39170	Glyma01g39170	Glyma01g39170	Gm01:51153265-51154075	14-13-0	14-13-14	NOTEST	0	0	0	0	1	1	no
Glyma01g39180	Glyma01g39180	Glyma01g39180	Gm01:51160065-51160350	14-13-0	14-13-14	NOTEST	0	0	0	0	1	1	no
Glyma01g39190	Glyma01g39190	Glyma01g39190	Gm01:51164315-51168296	14-13-0	14-13-14	OK	0.635506	5.18801	3.0292	-2.54958	0.0107852	0.0912731	no
Glyma01g39200	Glyma01g39200	Glyma01g39200	Gm01:51176939-51182827	14-13-0	14-13-14	OK	115.617	34.8549	-1.72991	1.85429	0.0636972	0.266719	no
Glyma01g39220	Glyma01g39220	Glyma01g39220	Gm01:51195447-51198098	14-13-0	14-13-14	OK	1.95435	6.87802	1.81531	-2.24752	0.0246067	0.154483	no
Glyma01g39230	Glyma01g39230	Glyma01g39230	Gm01:51207026-51208664	14-13-0	14-13-14	OK	0	1.1216	1.79769e+308	1.79769e+308	0.0296955	0.173267	no
Glyma01g39240	Glyma01g39240	Glyma01g39240	Gm01:51218796-51220209	14-13-0	14-13-14	OK	6.19148	0.586107	-3.40105	3.46955	0.000521327	0.0100097	yes
Glyma01g39250	Glyma01g39250	Glyma01g39250	Gm01:51223239-51226456	14-13-0	14-13-14	OK	13.607	7.76957	-0.808438	0.817914	0.413406	0.749157	no
Glyma01g39260	Glyma01g39260	Glyma01g39260	Gm01:51227462-51229777	14-13-0	14-13-14	OK	1.63408	0.949186	-0.783716	0.790513	0.429228	0.76111	no
Glyma01g39270	Glyma01g39270	Glyma01g39270	Gm01:51234092-51236207	14-13-0	14-13-14	OK	76.8343	35.1019	-1.1302	1.23778	0.215796	0.543296	no
Glyma01g39280	Glyma01g39280	Glyma01g39280	Gm01:51241780-51246700	14-13-0	14-13-14	OK	18.0125	13.4397	-0.422497	0.551917	0.581005	0.857955	no
Glyma01g39290	Glyma01g39290	Glyma01g39290	Gm01:51259529-51261619	14-13-0	14-13-14	OK	4.7156	3.93733	-0.260223	0.350323	0.726096	0.923723	no
Glyma01g39300	Glyma01g39300	Glyma01g39300	Gm01:51273336-51279506	14-13-0	14-13-14	NOTEST	0	0	0	0	1	1	no
Glyma01g39306	Glyma01g39306	Glyma01g39306	Gm01:51273336-51279506	14-13-0	14-13-14	NOTEST	0	0	0	0	1	1	no
Glyma01g39313	Glyma01g39313	Glyma01g39313	Gm01:51280851-51284021	14-13-0	14-13-14	NOTEST	0	0	0	0	1	1	no
Glyma01g39320	Glyma01g39320	Glyma01g39320	Gm01:51287475-51290552	14-13-0	14-13-14	OK	5.16346	6.12672	0.246776	-0.335884	0.736958	0.928295	no
Glyma01g39330	Glyma01g39330	Glyma01g39330	Gm01:51290922-51295650	14-13-0	14-13-14	OK	15.468	15.5111	0.00401872	-0.00546262	0.995641	0.999487	no
Glyma01g39340	Glyma01g39340	Glyma01g39340	Gm01:51296877-51297857	14-13-0	14-13-14	OK	0.91964	2.72401	1.56659	-1.38791	0.165164	0.470835	no
Glyma01g39350	Glyma01g39350	Glyma01g39350	Gm01:51298441-51305321	14-13-0	14-13-14	OK	32.8283	45.608	0.474348	-0.562414	0.573834	0.854172	no
Glyma01g39360	Glyma01g39360	Glyma01g39360	Gm01:51314677-51315832	14-13-0	14-13-14	OK	0	0.679673	1.79769e+308	1.79769e+308	0.037775	0.197586	no
Glyma01g39370	Glyma01g39370	Glyma01g39370	Gm01:51321188-51322374	14-13-0	14-13-14	OK	5.73533	58.6297	3.35368	-4.11903	3.8047e-05	0.00131796	yes
Glyma01g39380	Glyma01g39380	Glyma01g39380	Gm01:51332253-51333769	14-13-0	14-13-14	NOTEST	0	0	0	0	1	1	no
Glyma01g39391	Glyma01g39391	Glyma01g39391	Gm01:51334950-51335823	14-13-0	14-13-14	NOTEST	0	0	0	0	1	1	no
Glyma01g39401	Glyma01g39401	Glyma01g39401	Gm01:51345282-51346122	14-13-0	14-13-14	NOTEST	0	0	0	0	1	1	no
Glyma01g39410	Glyma01g39410	Glyma01g39410	Gm01:51349990-51355206	14-13-0	14-13-14	OK	6.62054	15.2562	1.20438	-1.41503	0.157059	0.457627	no
Glyma01g39420	Glyma01g39420	Glyma01g39420	Gm01:51355206-51358366	14-13-0	14-13-14	OK	3.67816	7.01336	0.931122	-1.26683	0.205216	0.529944	no
Glyma01g39430	Glyma01g39430	Glyma01g39430	Gm01:51363128-51376630	14-13-0	14-13-14	OK	1.72027	2.83512	0.720772	-0.988549	0.322884	0.669401	no
Glyma01g39440	Glyma01g39440	Glyma01g39440	Gm01:51376879-51383234	14-13-0	14-13-14	NOTEST	0	0.0398424	1.79769e+308	1.79769e+308	0.117179	1	no
Glyma01g39451	Glyma01g39451	Glyma01g39451	Gm01:51385174-51388582	14-13-0	14-13-14	OK	0.778263	3.35859	2.10952	-2.22986	0.0257569	0.159151	no
Glyma01g39460	Glyma01g39460	Glyma01g39460	Gm01:51397147-51399175	14-13-0	14-13-14	OK	1.49322	1.98859	0.413323	-0.399685	0.689389	0.908399	no
Glyma01g39470	Glyma01g39470	Glyma01g39470	Gm01:51403228-51406259	14-13-0	14-13-14	OK	3.66033	1.85011	-0.984364	0.997902	0.318327	0.665215	no
Glyma01g39480	Glyma01g39480	Glyma01g39480	Gm01:51407024-51411165	14-13-0	14-13-14	OK	0.176428	0.536462	1.6044	-1.35984	0.17388	0.486263	no
Glyma01g39490	Glyma01g39490	Glyma01g39490	Gm01:51412886-51422885	14-13-0	14-13-14	OK	1.78114	4.21547	1.24289	-1.63035	0.103027	0.356797	no
Glyma01g39500	Glyma01g39500	Glyma01g39500	Gm01:51428871-51431363	14-13-0	14-13-14	OK	120.844	14.7818	-3.03126	3.40639	0.000658272	0.011902	yes
Glyma01g39510	Glyma01g39510	Glyma01g39510	Gm01:51431925-51439061	14-13-0	14-13-14	OK	0.649307	3.01271	2.21409	-2.27149	0.0231174	0.149459	no
Glyma01g39520	Glyma01g39520	Glyma01g39520	Gm01:51456457-51460406	14-13-0	14-13-14	OK	7.54463	11.1168	0.559218	-0.610463	0.541555	0.83542	no
Glyma01g39530	Glyma01g39530	Glyma01g39530	Gm01:51483951-51489283	14-13-0	14-13-14	OK	198.721	139.352	-0.512012	0.412133	0.680242	0.904913	no
Glyma01g39540	Glyma01g39540	Glyma01g39540	Gm01:51490230-51491823	14-13-0	14-13-14	OK	24.7899	12.2501	-1.01695	1.36038	0.173711	0.486003	no
Glyma01g39560	Glyma01g39560	Glyma01g39560	Gm01:51508290-51512259	14-13-0	14-13-14	OK	8.84565	5.12731	-0.786767	0.98872	0.3228	0.669295	no
Glyma01g39570	Glyma01g39570	Glyma01g39570	Gm01:51516172-51517312	14-13-0	14-13-14	OK	0.998821	0.359344	-1.47486	1.26517	0.20581	0.530697	no
Glyma01g39580	Glyma01g39580	Glyma01g39580	Gm01:51518038-51522362	14-13-0	14-13-14	OK	14.4995	17.2987	0.254662	-0.352581	0.724403	0.922734	no
Glyma01g39590	Glyma01g39590	Glyma01g39590	Gm01:51527348-51528891	14-13-0	14-13-14	OK	0.714594	0.716841	0.00452834	-0.00411692	0.996715	0.999604	no
Glyma01g39600	Glyma01g39600	Glyma01g39600	Gm01:51531989-51534998	14-13-0	14-13-14	OK	6.31466	9.36762	0.568977	-0.711681	0.476662	0.795241	no
Glyma01g39610	Glyma01g39610	Glyma01g39610	Gm01:51545785-51549819	14-13-0	14-13-14	OK	1.64512	1.76937	0.105041	-0.122473	0.902525	0.979999	no
Glyma01g39630	Glyma01g39630	Glyma01g39630	Gm01:51555027-51556605	14-13-0	14-13-14	OK	0.696949	1.03313	0.567901	-0.525283	0.599386	0.867927	no
Glyma01g39640	Glyma01g39640	Glyma01g39640	Gm01:51557943-51560354	14-13-0	14-13-14	OK	8.37295	9.58113	0.194459	-0.260509	0.794471	0.949365	no
Glyma01g39650	Glyma01g39650	Glyma01g39650	Gm01:51565663-51573461	14-13-0	14-13-14	OK	3.02002	5.28885	0.808395	-1.08148	0.279482	0.623297	no
Glyma01g39660	Glyma01g39660	Glyma01g39660	Gm01:51574045-51576407	14-13-0	14-13-14	OK	1.57824	1.74376	0.143887	-0.164166	0.8696	0.971691	no
Glyma01g39690	Glyma01g39690	Glyma01g39690	Gm01:51579270-51581490	14-13-0	14-13-14	OK	0.0407987	1.22045	4.90274	-3.44138	0.000578758	0.0108206	yes
Glyma01g39700	Glyma01g39700	Glyma01g39700	Gm01:51584479-51586969	14-13-0	14-13-14	OK	6.62624	0.714904	-3.21237	3.07347	0.00211585	0.0293785	yes
Glyma01g39710	Glyma01g39710	Glyma01g39710	Gm01:51587208-51587971	14-13-0	14-13-14	OK	0.564901	0.0737987	-2.93633	1.50827	0.131486	0.41187	no
Glyma01g39720	Glyma01g39720	Glyma01g39720	Gm01:51588563-51590809	14-13-0	14-13-14	OK	0.0857494	2.82354	5.04123	-4.25345	2.10506e-05	0.000846304	yes
Glyma01g39740	Glyma01g39740	Glyma01g39740	Gm01:51613142-51614901	14-13-0	14-13-14	OK	17.1653	23.5677	0.457313	-0.591974	0.553868	0.842515	no
Glyma01g39750	Glyma01g39750	Glyma01g39750	Gm01:51624486-51625983	14-13-0	14-13-14	OK	0.537575	0.344253	-0.642998	0.436798	0.662258	0.897132	no
Glyma01g39760	Glyma01g39760	Glyma01g39760	Gm01:51627630-51629200	14-13-0	14-13-14	NOTEST	0.0559431	0.028647	-0.965574	0.456334	0.64815	1	no
Glyma01g39770	Glyma01g39770	Glyma01g39770	Gm01:51633199-51634269	14-13-0	14-13-14	OK	17.6128	12.5092	-0.493636	0.66501	0.506044	0.812143	no
Glyma01g39780	Glyma01g39780	Glyma01g39780	Gm01:51645378-51647678	14-13-0	14-13-14	NOTEST	0	0	0	0	1	1	no
Glyma01g39790	Glyma01g39790	Glyma01g39790	Gm01:51653322-51656914	14-13-0	14-13-14	OK	48.5016	7.47046	-2.69876	3.30843	0.000938216	0.0155817	yes
Glyma01g39800	Glyma01g39800	Glyma01g39800	Gm01:51659391-51665037	14-13-0	14-13-14	OK	1.84097	1.68673	-0.126236	0.139319	0.889198	0.976122	no
Glyma01g39810	Glyma01g39810	Glyma01g39810	Gm01:51668222-51670161	14-13-0	14-13-14	OK	14.4201	54.2965	1.91278	-2.40706	0.0160815	0.119019	no
Glyma01g39820	Glyma01g39820	Glyma01g39820	Gm01:51675929-51677501	14-13-0	14-13-14	NOTEST	0	0	0	0	1	1	no
Glyma01g39830	Glyma01g39830	Glyma01g39830	Gm01:51679882-51690594	14-13-0	14-13-14	OK	3.58051	3.21512	-0.155292	0.205961	0.836821	0.961864	no
Glyma01g39850	Glyma01g39850	Glyma01g39850	Gm01:51698415-51700257	14-13-0	14-13-14	OK	7.33748	18.9146	1.36614	-1.85515	0.0635751	0.266523	no
Glyma01g39860	Glyma01g39860	Glyma01g39860	Gm01:51704330-51708072	14-13-0	14-13-14	OK	0.684117	0.274378	-1.31808	1.1227	0.261564	0.602029	no
Glyma01g39870	Glyma01g39870	Glyma01g39870	Gm01:51714716-51716494	14-13-0	14-13-14	NOTEST	0.0848	0.0839587	-0.0143845	0.00996703	0.992048	1	no
Glyma01g39880	Glyma01g39880	Glyma01g39880	Gm01:51721226-51730602	14-13-0	14-13-14	OK	0.781555	0.2536	-1.62379	0.290292	0.771593	0.941558	no
Glyma01g39890	Glyma01g39890	Glyma01g39890	Gm01:51721226-51730602	14-13-0	14-13-14	OK	65.9461	5.26574	-3.64658	4.14952	3.33176e-05	0.00118654	yes
Glyma01g39900	Glyma01g39900	Glyma01g39900	Gm01:51730921-51747255	14-13-0	14-13-14	NOTEST	0.151824	0.156253	0.0414795	-0.00926689	0.992606	1	no
Glyma01g39910	Glyma01g39910	Glyma01g39910	Gm01:51730921-51747255	14-13-0	14-13-14	OK	1.70555	1.7989	0.076878	-0.0685362	0.945359	0.990487	no
Glyma01g39920	Glyma01g39920	Glyma01g39920	Gm01:51750715-51754579	14-13-0	14-13-14	OK	2.1113	1.14004	-0.889052	0.78071	0.434973	0.765684	no
Glyma01g39935	Glyma01g39935	Glyma01g39935	Gm01:51755461-51757387	14-13-0	14-13-14	OK	20.9087	15.0104	-0.478143	0.663292	0.507144	0.812703	no
Glyma01g39950	Glyma01g39950	Glyma01g39950	Gm01:51758052-51764933	14-13-0	14-13-14	OK	8.21147	16.6736	1.02185	-1.37131	0.17028	0.479736	no
Glyma01g39960	Glyma01g39960	Glyma01g39960	Gm01:51768697-51773656	14-13-0	14-13-14	OK	26.3892	15.0112	-0.813909	0.998249	0.318158	0.665142	no
Glyma01g39970	Glyma01g39970	Glyma01g39970	Gm01:51778756-51782898	14-13-0	14-13-14	OK	16.7693	3.42727	-2.29069	3.00085	0.00269226	0.0346534	yes
Glyma01g39981	Glyma01g39981	Glyma01g39981	Gm01:51784287-51787179	14-13-0	14-13-14	OK	1.51672	1.0486	-0.532488	0.433561	0.664607	0.898211	no
Glyma01g39990	Glyma01g39990	Glyma01g39990	Gm01:51795376-51797766	14-13-0	14-13-14	OK	1.01093	9.1381	3.17621	-3.49901	0.000466987	0.00922753	yes
Glyma01g40010	Glyma01g40010	Glyma01g40010	Gm01:51813387-51815770	14-13-0	14-13-14	OK	33.6933	0.711925	-5.56459	5.79908	6.6678e-09	1.48374e-06	yes
Glyma01g40030	Glyma01g40030	Glyma01g40030	Gm01:51830579-51838128	14-13-0	14-13-14	OK	2.09212	0.283847	-2.88178	0.423119	0.672209	0.901016	no
Glyma01g40041	Glyma01g40041	Glyma01g40041	Gm01:51830579-51838128	14-13-0	14-13-14	OK	3.65462	3.44143	-0.0867133	0.113804	0.909393	0.981888	no
Glyma01g40050	Glyma01g40050	Glyma01g40050	Gm01:51861767-51863943	14-13-0	14-13-14	OK	0.108802	1.35715	3.64079	-3.09201	0.00198808	0.0279211	yes
Glyma01g40060	Glyma01g40060	Glyma01g40060	Gm01:51873281-51875272	14-13-0	14-13-14	OK	0	0.995824	1.79769e+308	1.79769e+308	0.0254582	0.158109	no
Glyma01g40080	Glyma01g40080	Glyma01g40080	Gm01:51889805-51895295	14-13-0	14-13-14	OK	4.70123	3.01889	-0.639019	0.884243	0.376565	0.718517	no
Glyma01g40090	Glyma01g40090	Glyma01g40090	Gm01:51899586-51905304	14-13-0	14-13-14	OK	3.70347	0.0872185	-5.4081	3.60623	0.000310678	0.00675437	yes
Glyma01g40100	Glyma01g40100	Glyma01g40100	Gm01:51910087-51912612	14-13-0	14-13-14	OK	0	0.750671	1.79769e+308	1.79769e+308	0.0270313	0.164019	no
Glyma01g40110	Glyma01g40110	Glyma01g40110	Gm01:51918737-51926979	14-13-0	14-13-14	OK	0.0702264	0.946439	3.75242	-3.35529	0.000792805	0.0137084	yes
Glyma01g40130	Glyma01g40130	Glyma01g40130	Gm01:51926992-51932894	14-13-0	14-13-14	OK	6.29407	15.4262	1.29332	-1.57404	0.115478	0.383351	no
Glyma01g40140	Glyma01g40140	Glyma01g40140	Gm01:51939465-51943260	14-13-0	14-13-14	OK	43.0548	14.1097	-1.60949	2.04379	0.0409748	0.206366	no
Glyma01g40150	Glyma01g40150	Glyma01g40150	Gm01:51946620-51947536	14-13-0	14-13-14	OK	75.396	55.3038	-0.447109	0.547464	0.58406	0.859939	no
Glyma01g40161	Glyma01g40161	Glyma01g40161	Gm01:51948401-51952638	14-13-0	14-13-14	OK	0.843294	3.06247	1.86059	-1.99912	0.0455957	0.219631	no
Glyma01g40170	Glyma01g40170	Glyma01g40170	Gm01:51956944-51961922	14-13-0	14-13-14	OK	4.38939	4.12971	-0.0879783	0.120227	0.904303	0.980562	no
Glyma01g40180	Glyma01g40180	Glyma01g40180	Gm01:51965657-51969274	14-13-0	14-13-14	OK	2.96476	9.1024	1.61833	-2.15382	0.0312542	0.177732	no
Glyma01g40190	Glyma01g40190	Glyma01g40190	Gm01:51969918-51974115	14-13-0	14-13-14	OK	1.69954	2.87967	0.760758	-0.902657	0.366708	0.710381	no
[truncated: 52,176 more rows]
